# Supplementary material for: IsomiR expression profiles in human lymphoblastoid cell lines exhibit population and gender dependencies
Source: PubMed Central journal article supplement (PMC4226722; doi:10.18632/oncotarget.2405), 2014-08-27
Supplement: oncotarget-05-8790-s001.pdf [file oncotarget-05-8790-s001.pdf]

**Supp. Figure 1 (pages 1-194). isomiR boxplots.** Shown are boxplots for all 194 miRBase miRNAs and their associated isomiRs. For each plot, the Y-axis is the quantile normalized sequence read counts for each isomiR. The miRBase reference is green and the isomiRs are red.

**Supp. Figure 2 (pages 195-199). Differentially expressed isomiRs for each population.** Shown are individual heatmaps for each of the five different population groups examined. Plotted are the population comparisons (columns) and the rows are the different isomiRs. Cells shown in light gray correspond to cases that did not reach statistical significance for the corresponding isomiR/population combination. All other cells correspond to statistically significant combinations with an associated FDR value  $\leq 0.05$ . The color intensity scale is logarithmic ( $\log_2$ ).

**Supp. Figure 3 (pages 199-204). Differentially expressed isomiRs for males only.** Shown are individual heatmaps for each of the male subjects from the five different population groups examined. Plotted are the population comparisons (columns) and the rows are the different isomiRs. Cells shown in light gray correspond to cases that did not reach statistical significance for the corresponding isomiR/population combination. All other cells correspond to statistically significant combinations with an associated FDR value  $\leq 0.05$ . The color intensity scale is logarithmic ( $\log_2$ ).

**Supp. Figure 4 (pages 205-209). Differentially expressed isomiRs for females only.** Shown are individual heatmaps for each of the female subjects from the five different population groups examined. Plotted are the population comparisons (columns) and the rows are the different isomiRs. Cells shown in light gray correspond to cases that did not reach statistical significance for the corresponding isomiR/population combination. All other cells correspond to statistically significant combinations with an associated FDR value  $\leq 0.05$ . The color intensity scale is logarithmic ( $\log_2$ ).

**Supp. Figure 5 (page 210). Distribution of isomiR termini.** Shown is a schematic representation of the distribution of 5' and 3' terminus of the isomiRs. The 22 nts of the miRBase reference entry is shown in blue with each box and each box extending past represents an additional nucleotide position. The graphs show the distribution of bases at each nucleotide position either extending past the miRBase reference terminus or before the terminus.

---

**Supp. Table 1 (page 211). Statistics for each population separately for the single most abundant isomiR produced from a given precursor arm.** The most abundant isomiR's identity was determined by analyzing the technical replicates separately for each of the populations. At each locus, we also generated the "conservative" estimate by requiring that the most abundant isomiR have higher expression than the miRBase reference by at least  $0.585 \log_2$  units.

**Supp. Table 2 (page 212). Statistics for each population separately for the single most abundant isomiR produced from a given precursor arm – using only females.** The most abundant isomiR's identity was determined by analyzing the entire collection of all unique datasets that passed quality control and belonged to females. At each locus, we also generated the "conservative" estimate by requiring that the most abundant isomiR have higher expression than the miRBase reference by at least  $0.585 \log_2$  units.

**Supp. Table 3 (page 213). Statistics for each population separately for the single most abundant isomiR produced from a given precursor arm – using only males.** The most abundant isomiR's identity was determined by analyzing the entire collection of all unique datasets that passed quality control and belonged to males. At each locus, we also generated the "conservative" estimate by requiring that the most abundant isomiR have higher expression than the miRBase reference by at least  $0.585 \log_2$  units.

# MIMAT0000440=hsa-miR-191-5p=MI0000465

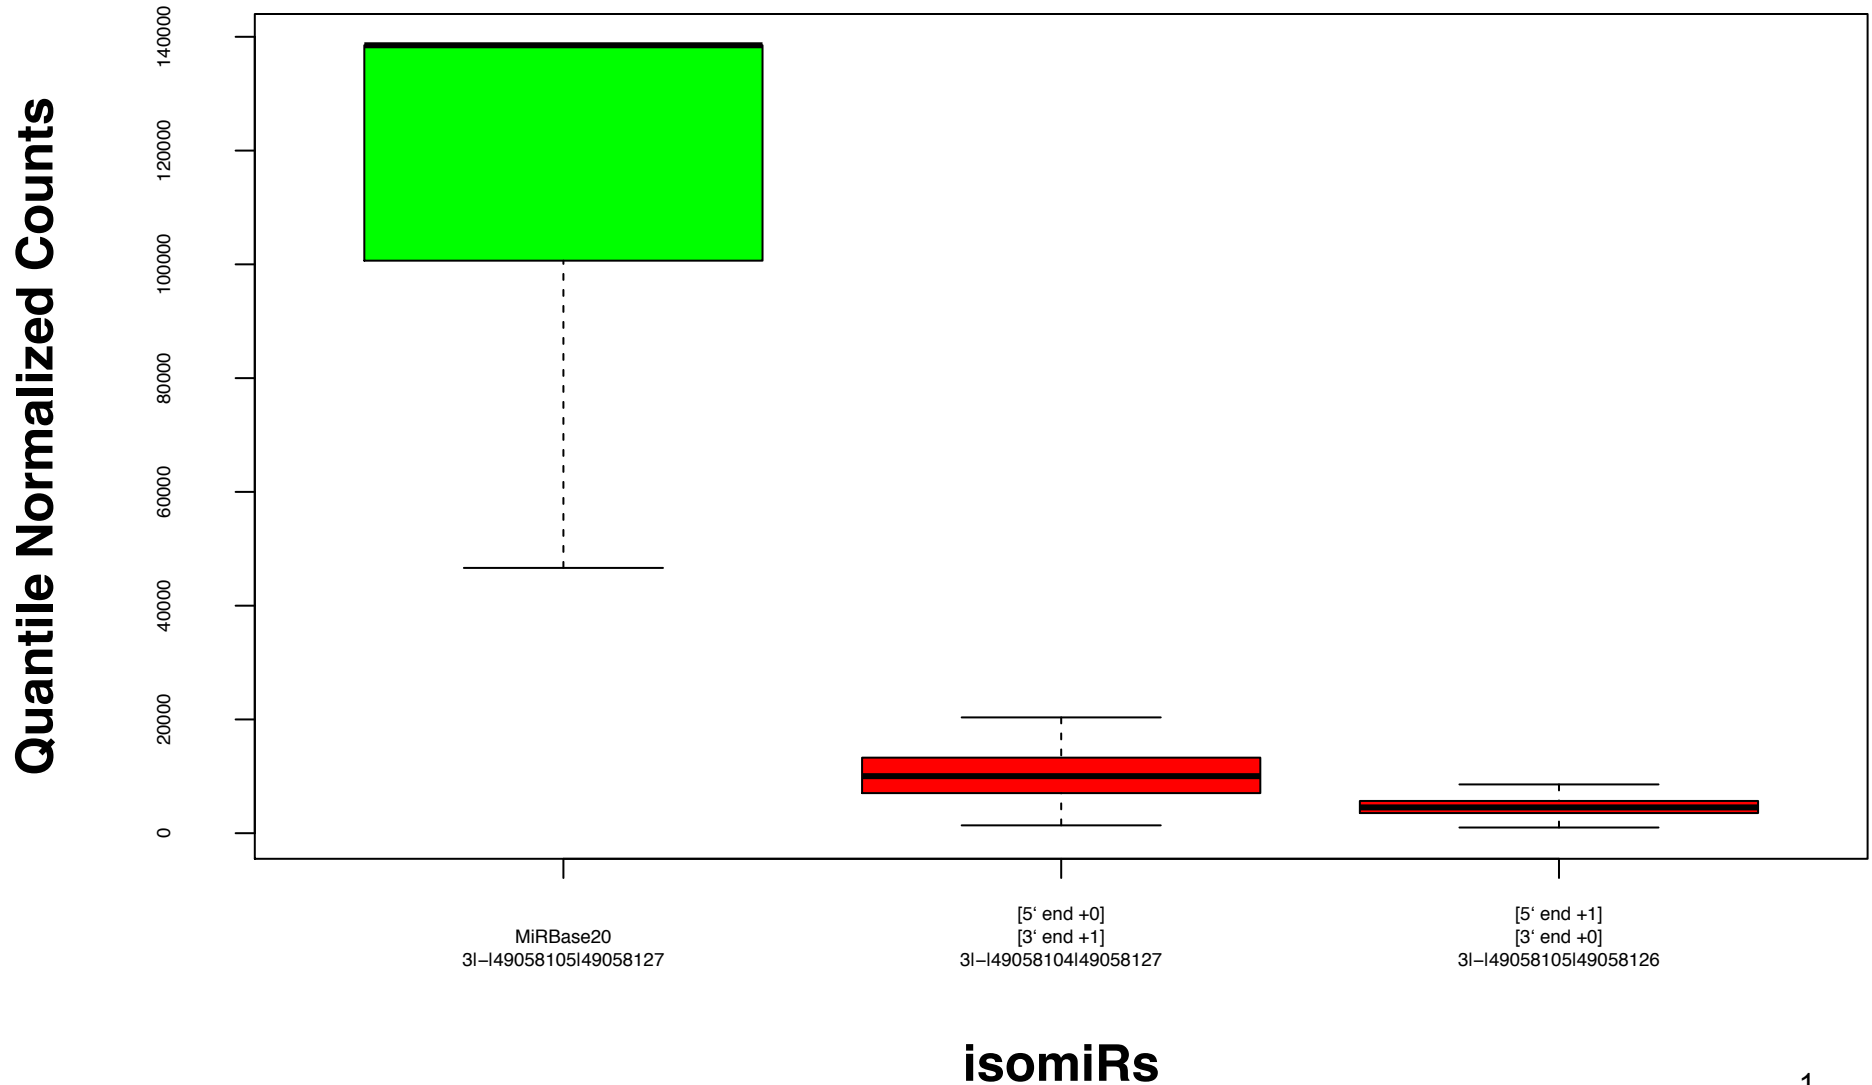

# MIMAT0000646=hsa-miR-155-5p=MI0000681

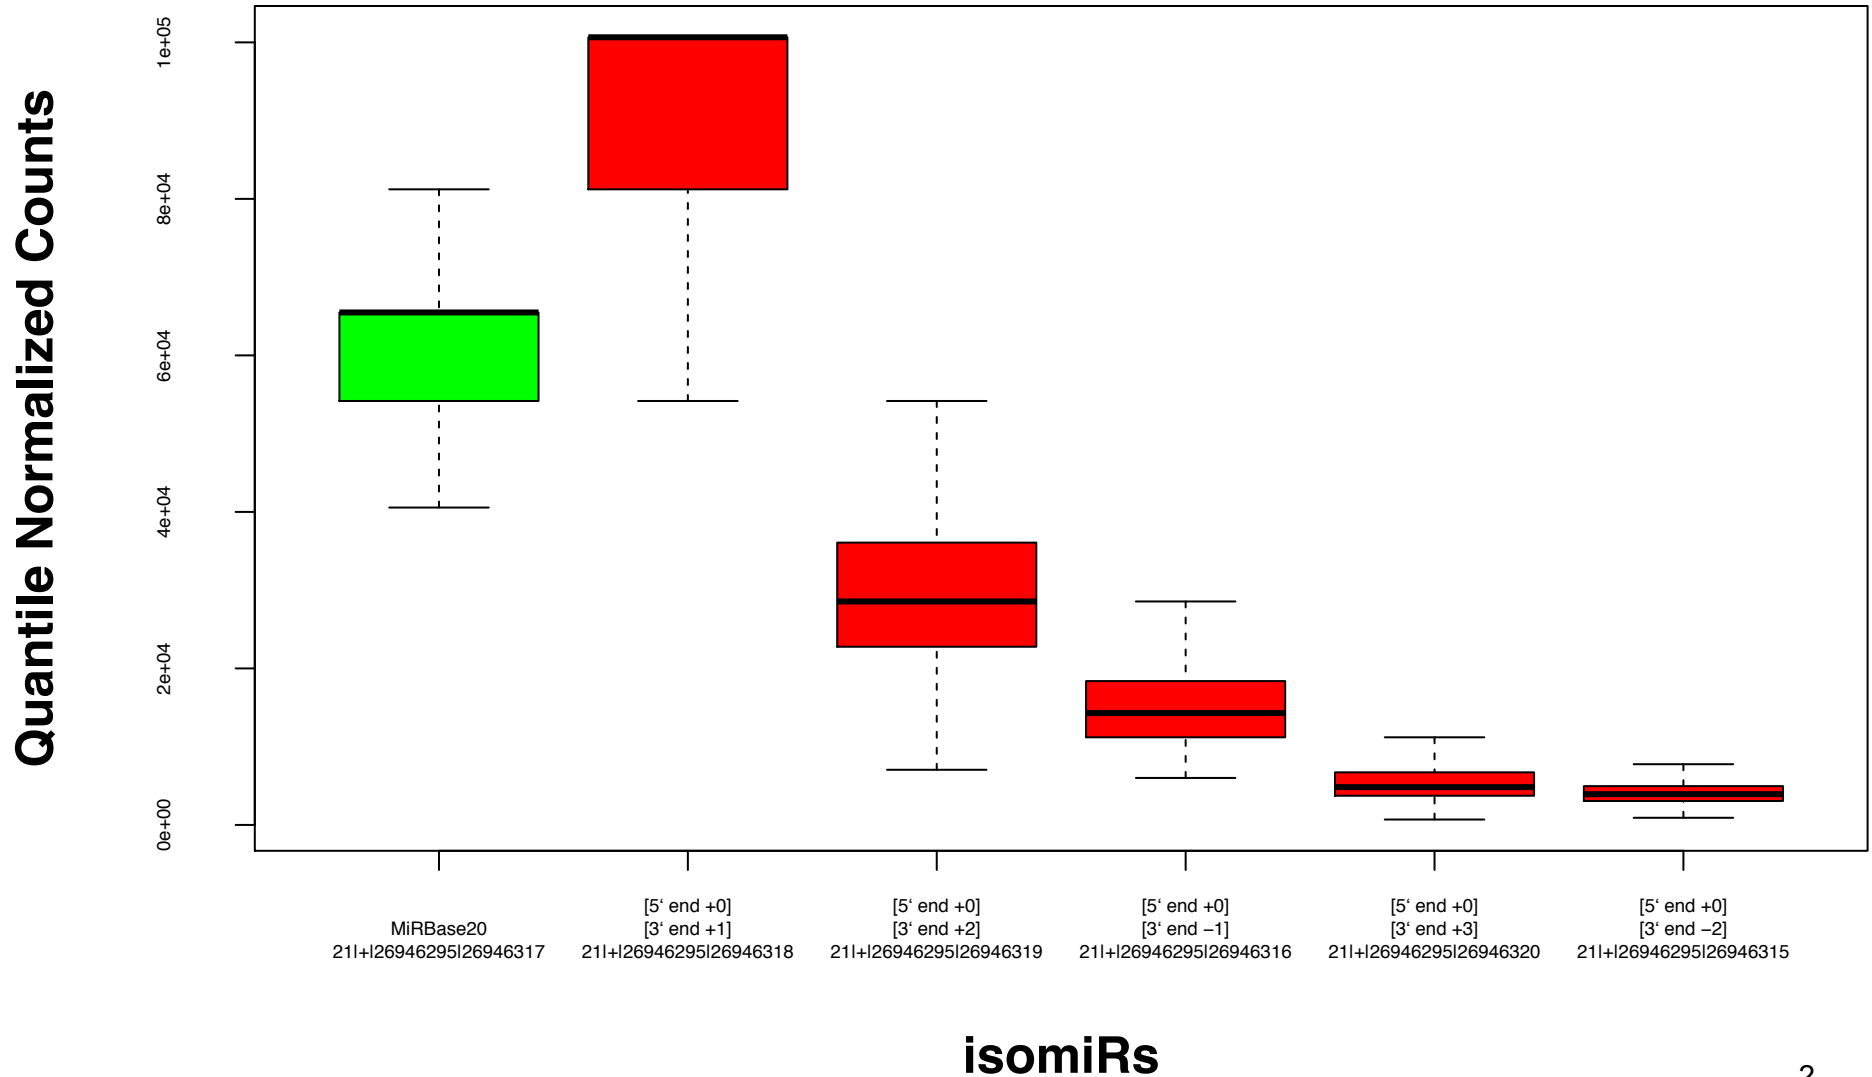

# MIMAT0000449=hsa-miR-146a-5p=MI0000477

Quantile Normalized Counts

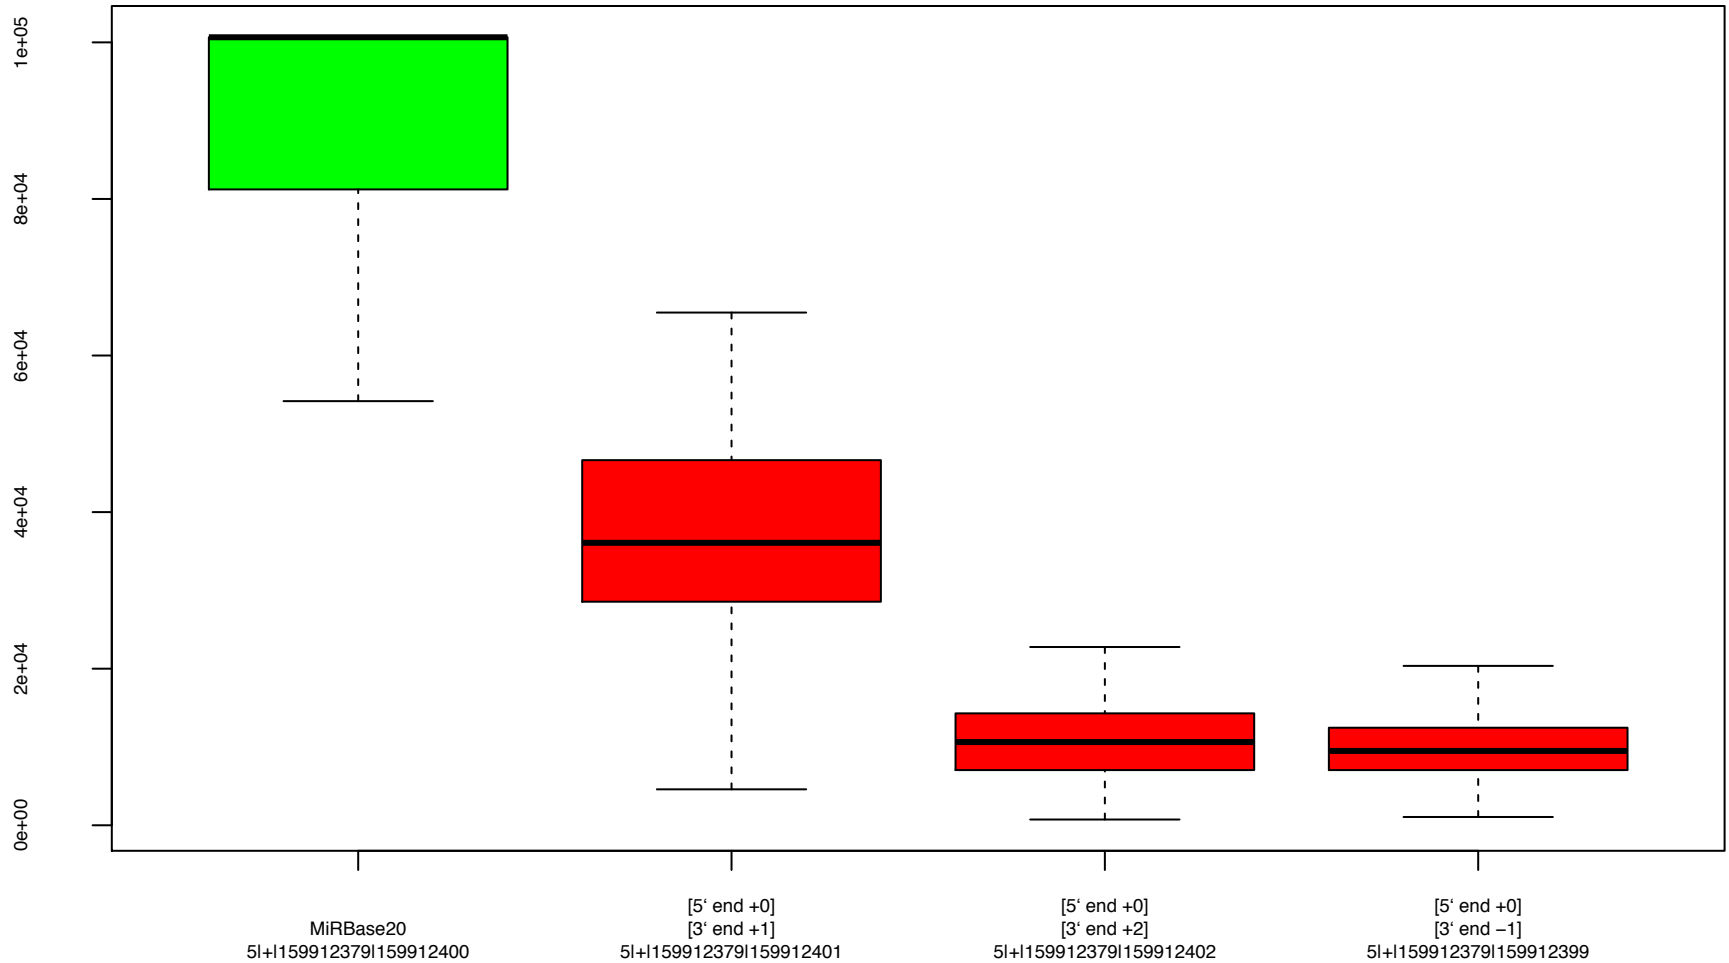

isomiRs

# MIMAT0000243=hsa-miR-148a-3p=MI0000253

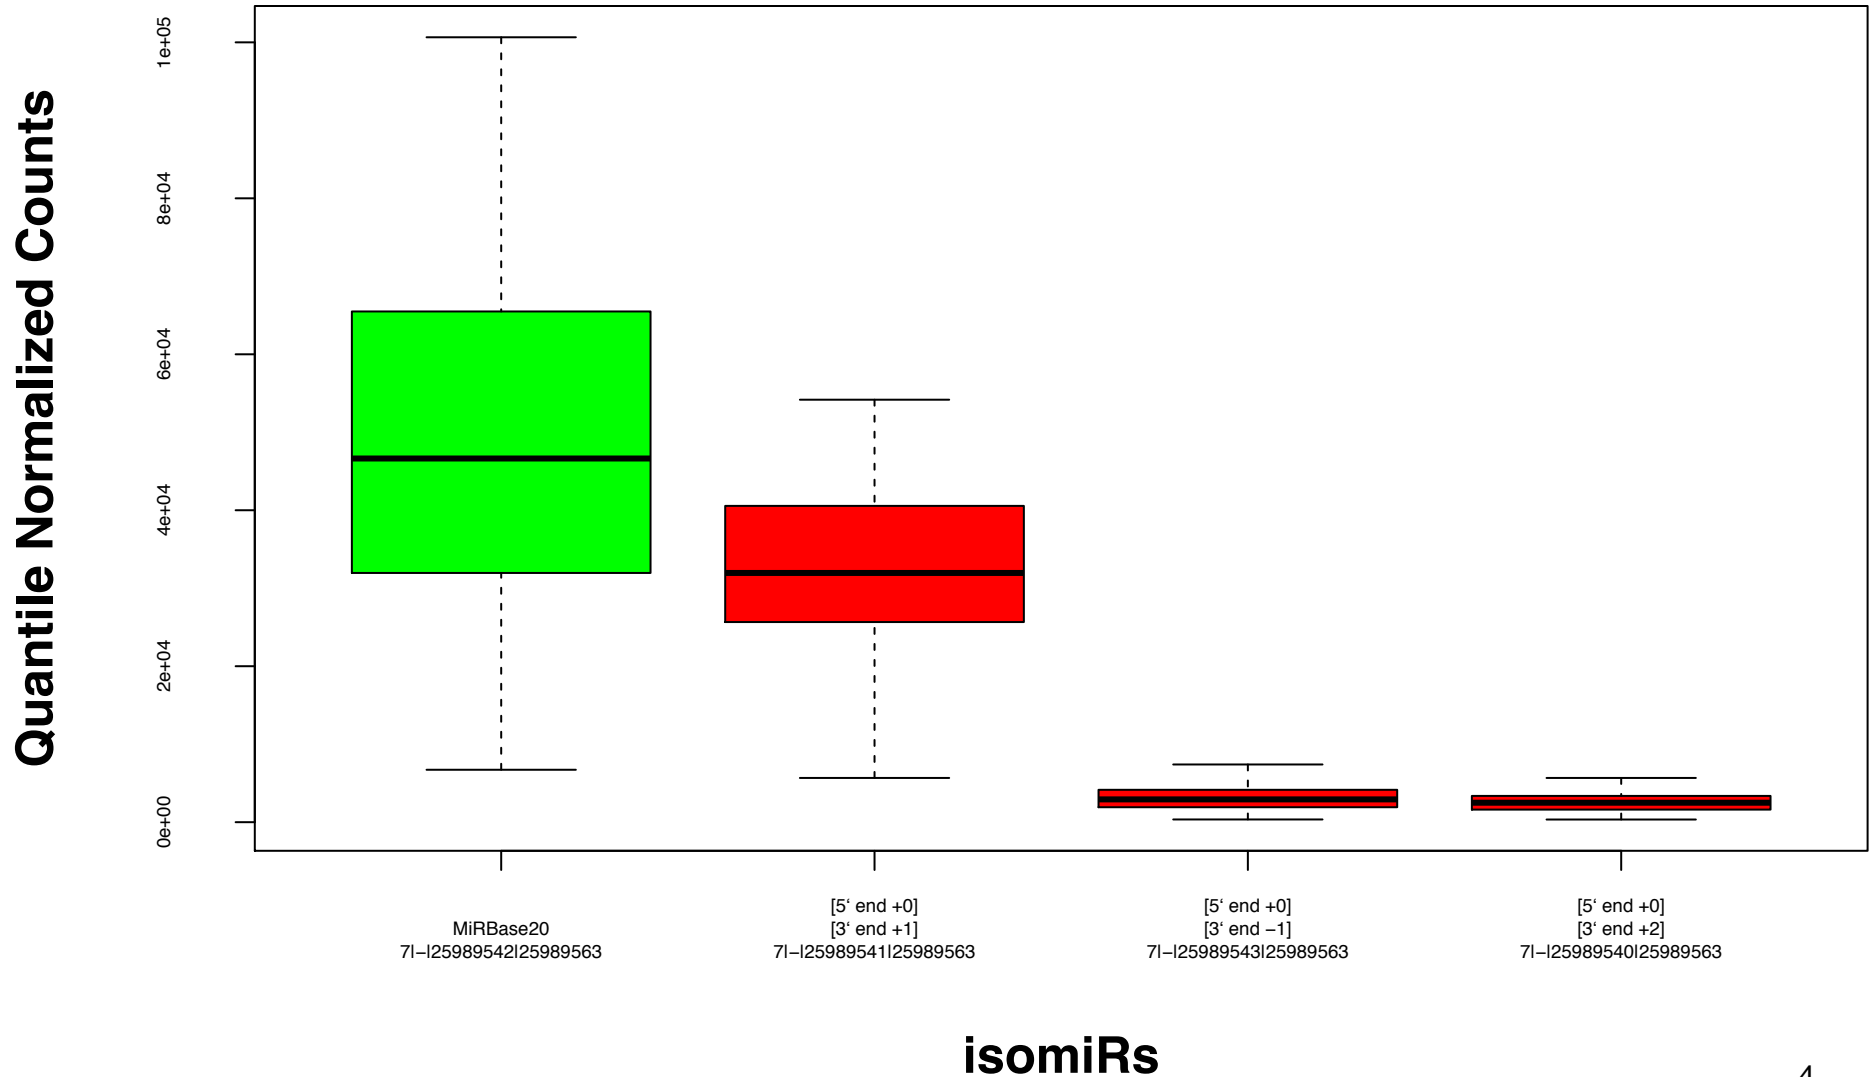

# MIMAT0002809=hsa-miR-146b-5p=MI0003129

Quantile Normalized Counts

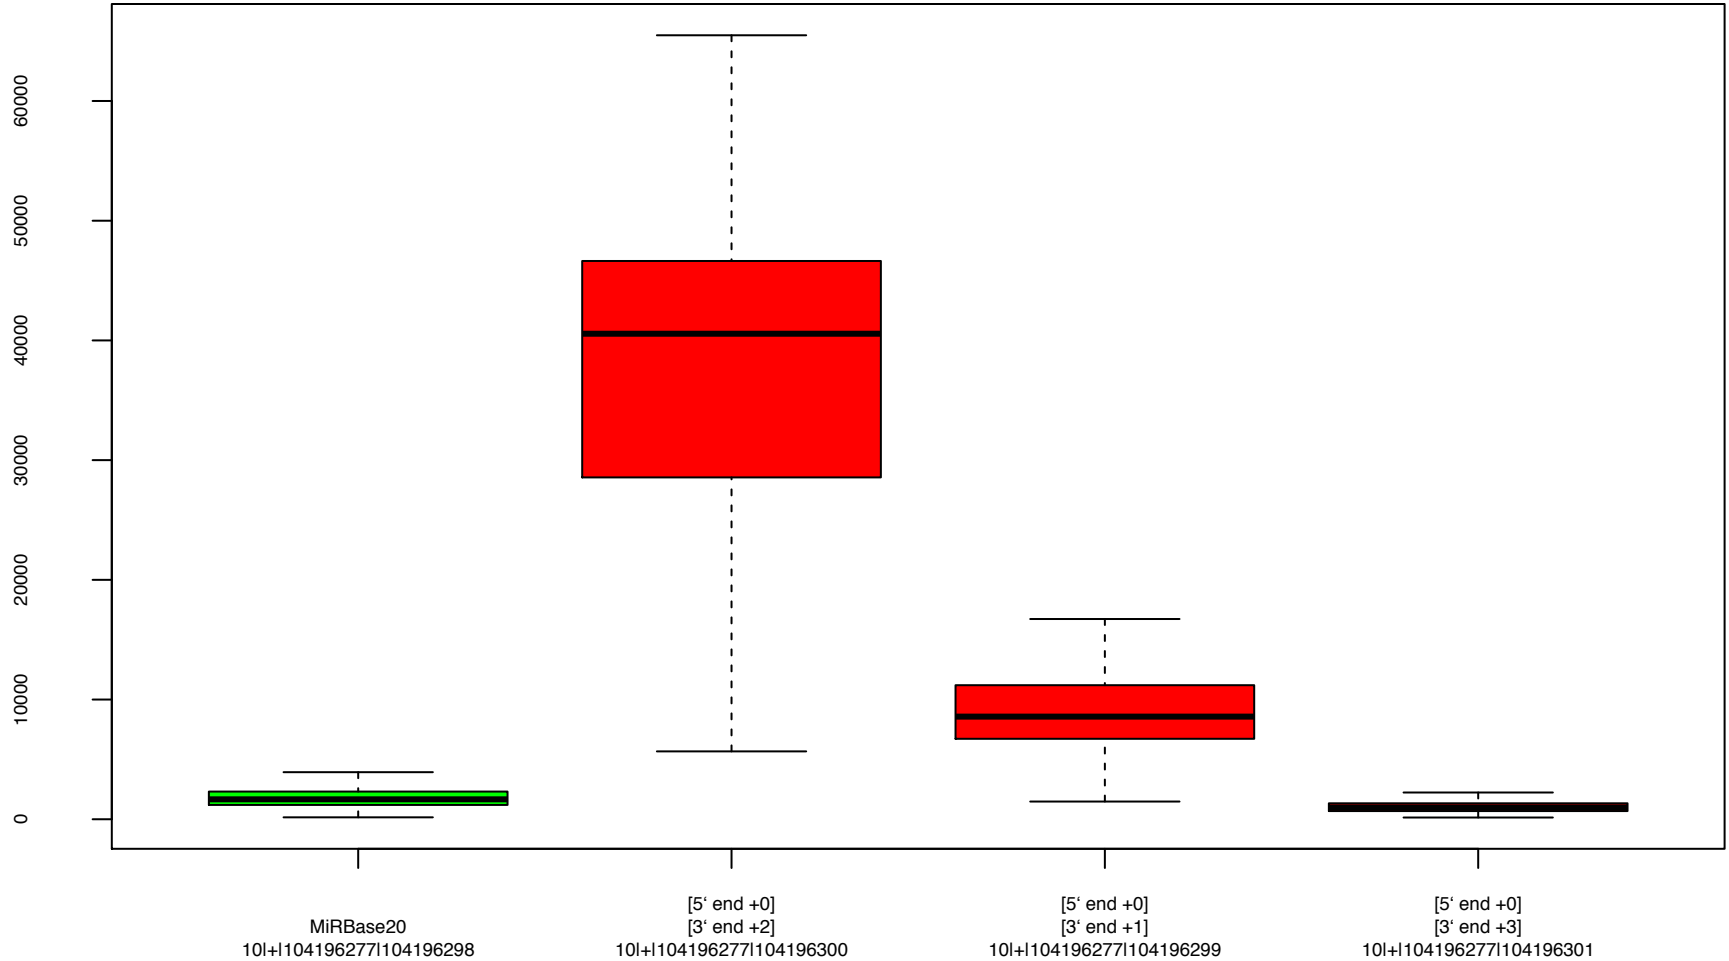

isomiRs

# MIMAT0000433=hsa-miR-142-5p=MI0000458

Quantile Normalized Counts

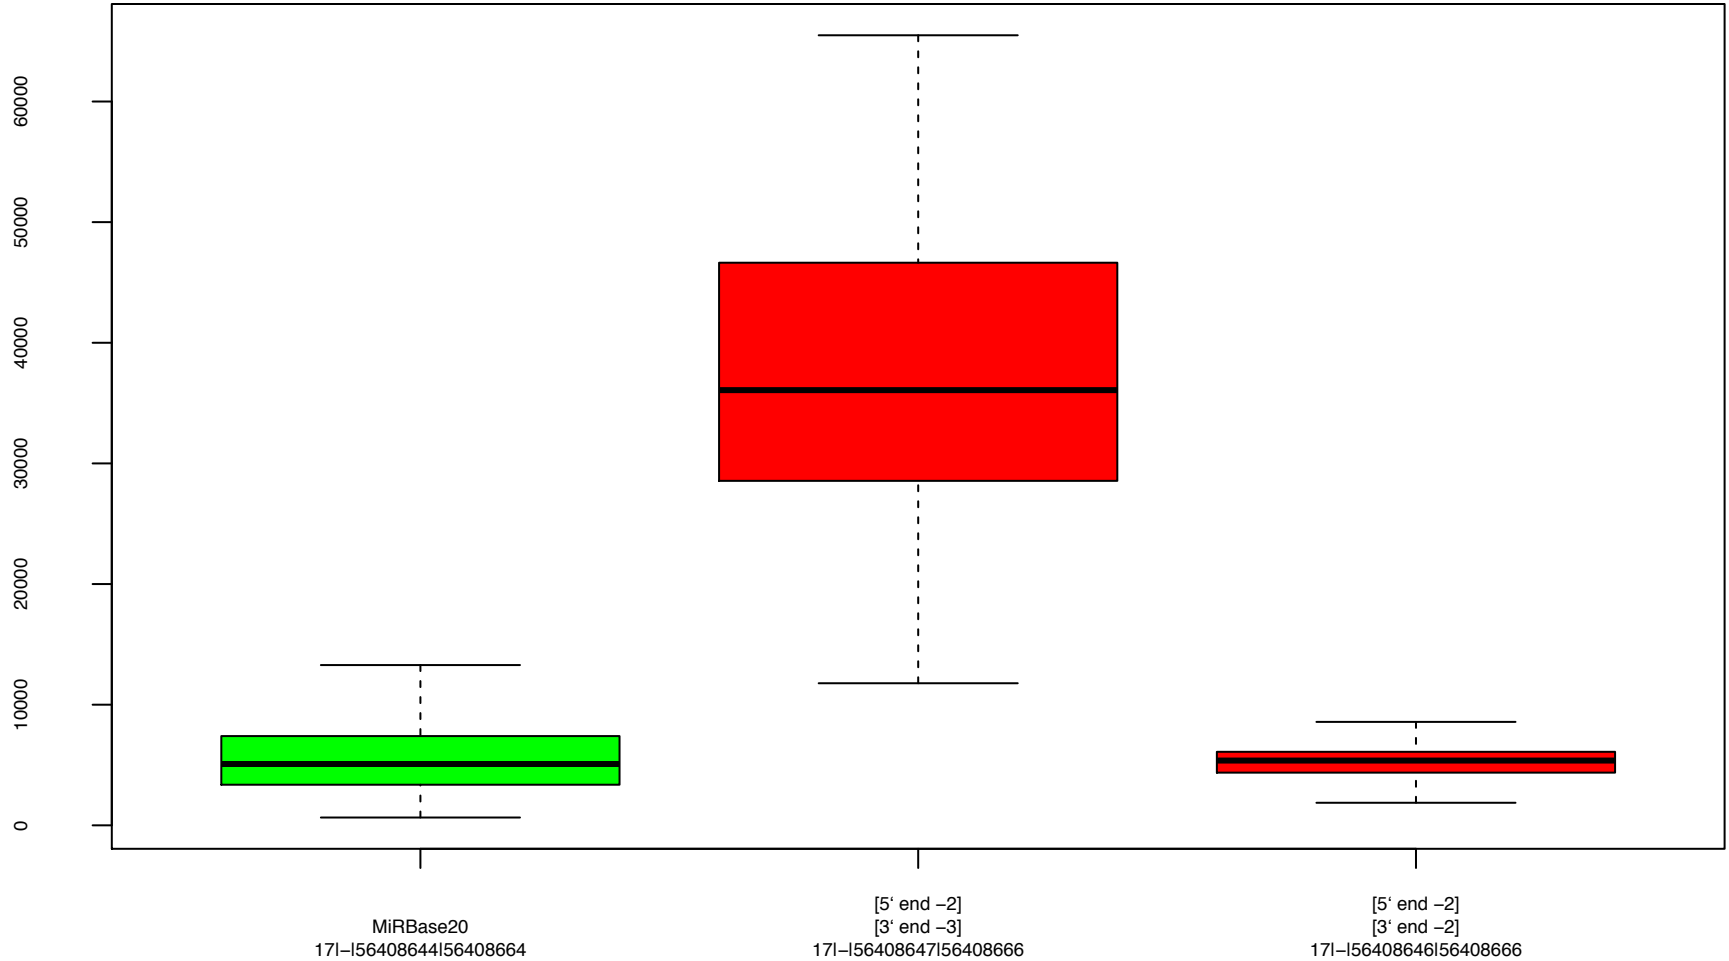

isomiRs

# MIMAT0000076=hsa-miR-21-5p=MI0000077

Quantile Normalized Counts

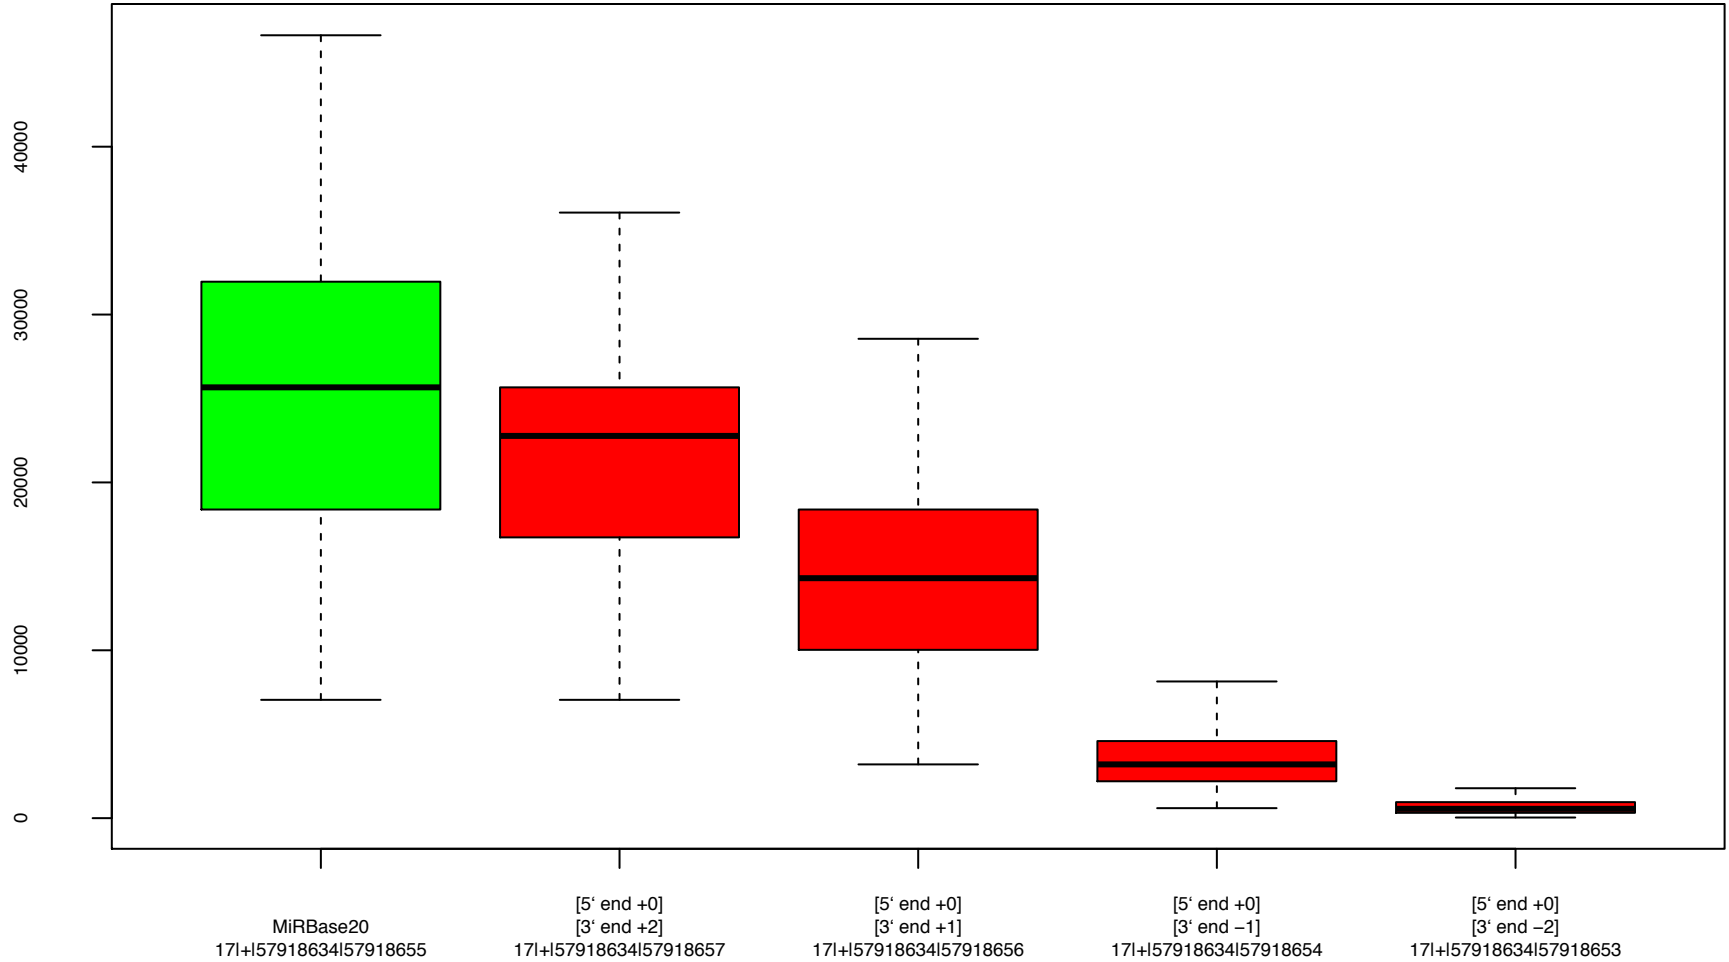

isomiRs



# MIMAT0000253=hsa-miR-10a-5p=MI0000266

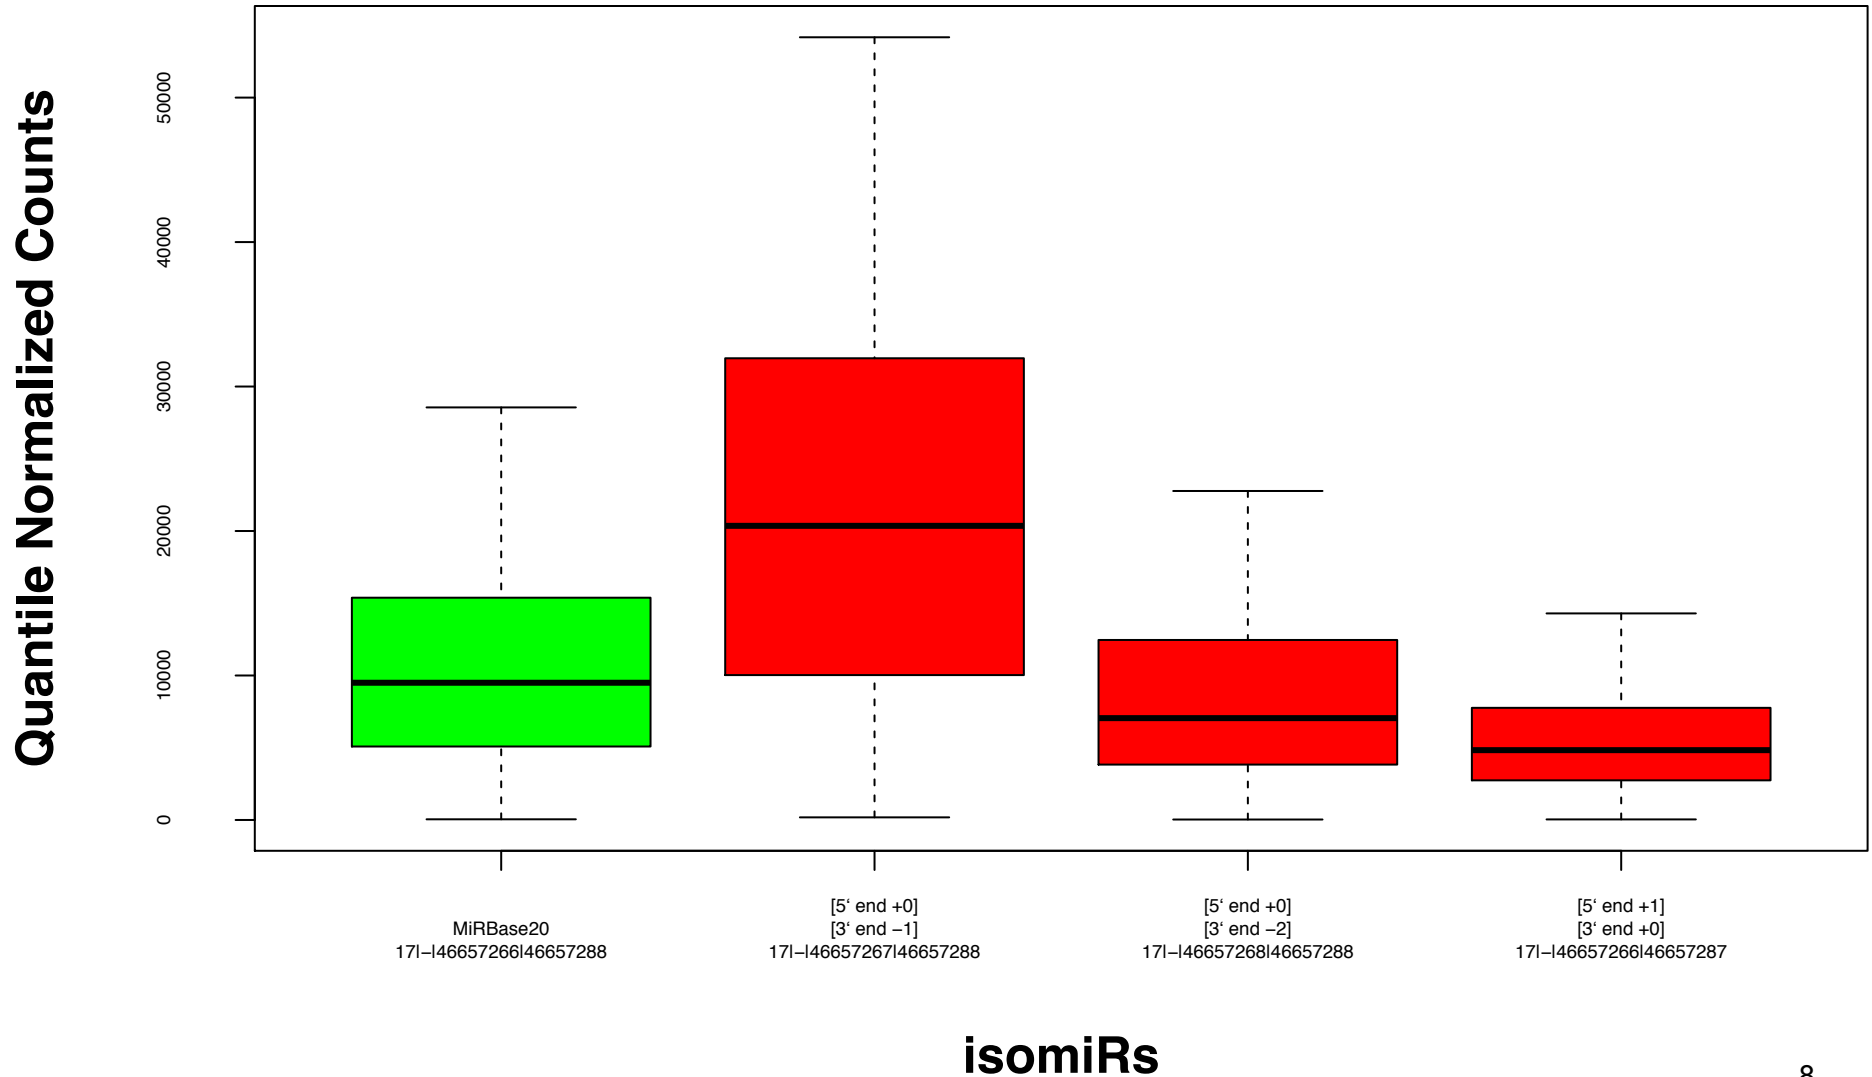

# MIMAT0000245=hsa-miR-30d-5p=MI0000255

Quantile Normalized Counts

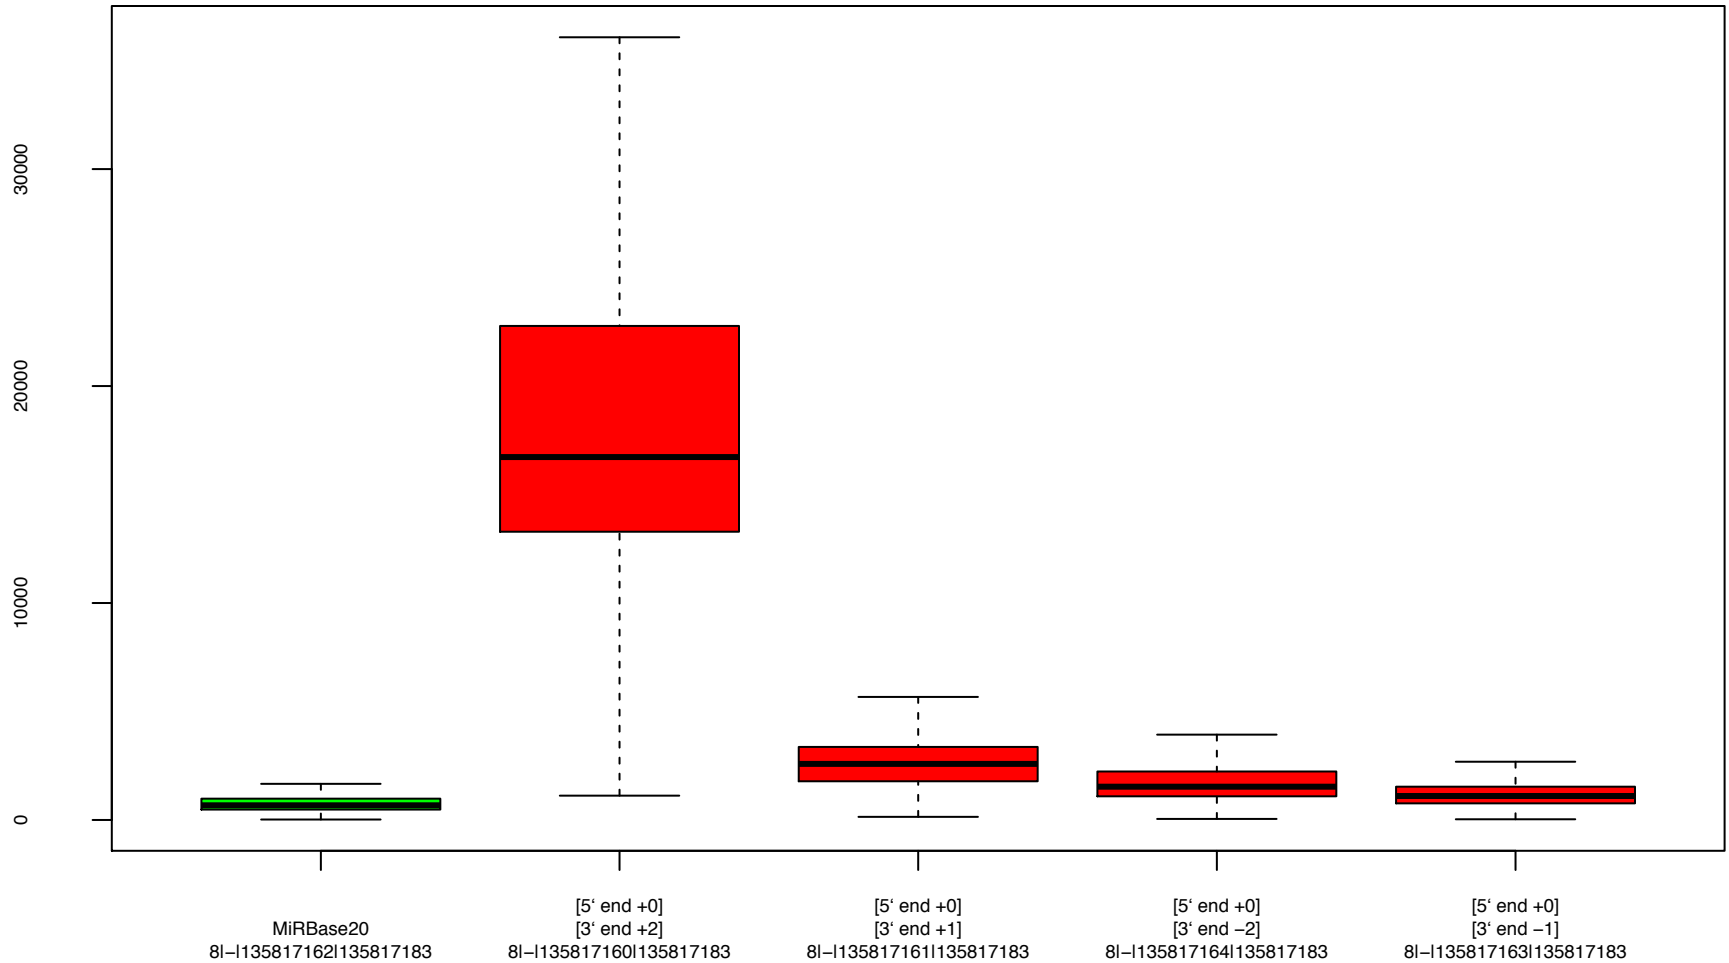

isomiRs

# MIMAT0000414=hsa-let-7g-5p=MI0000433

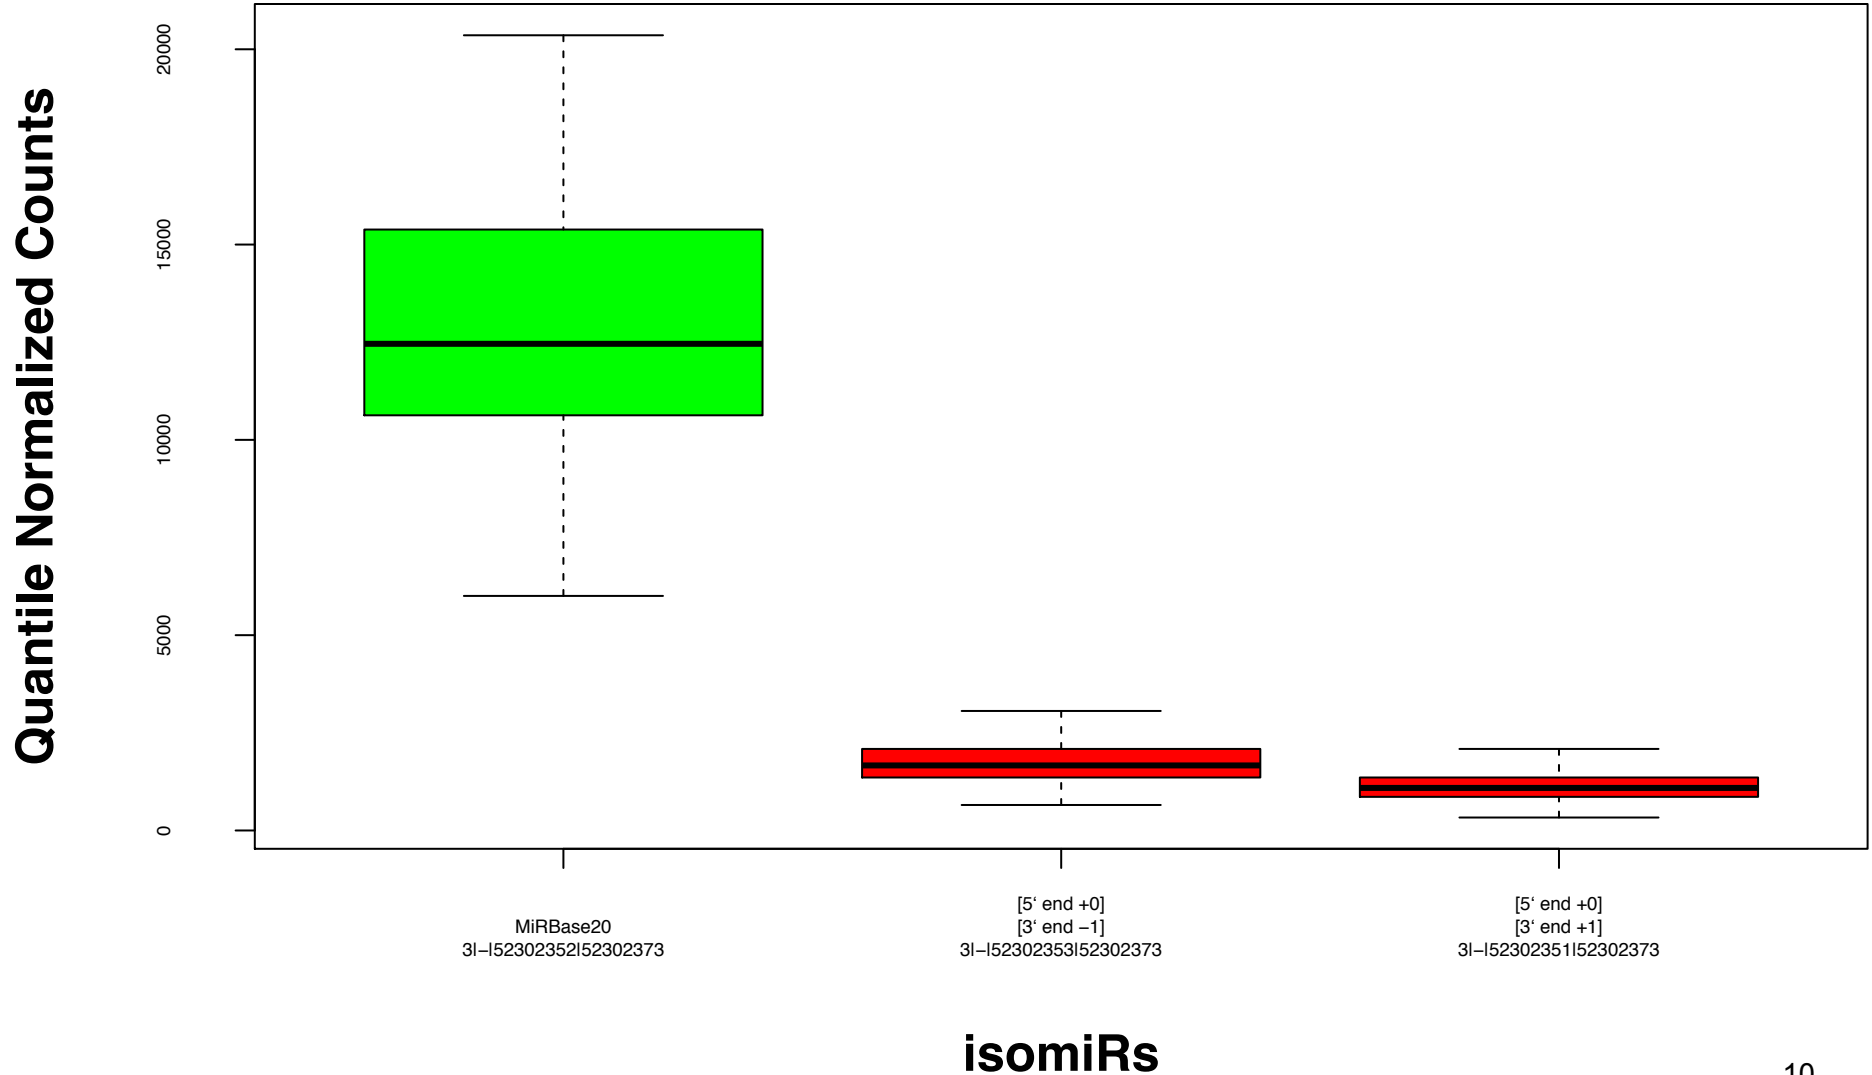

# MIMAT0004494=hsa-miR-21-3p=MI0000077

Quantile Normalized Counts

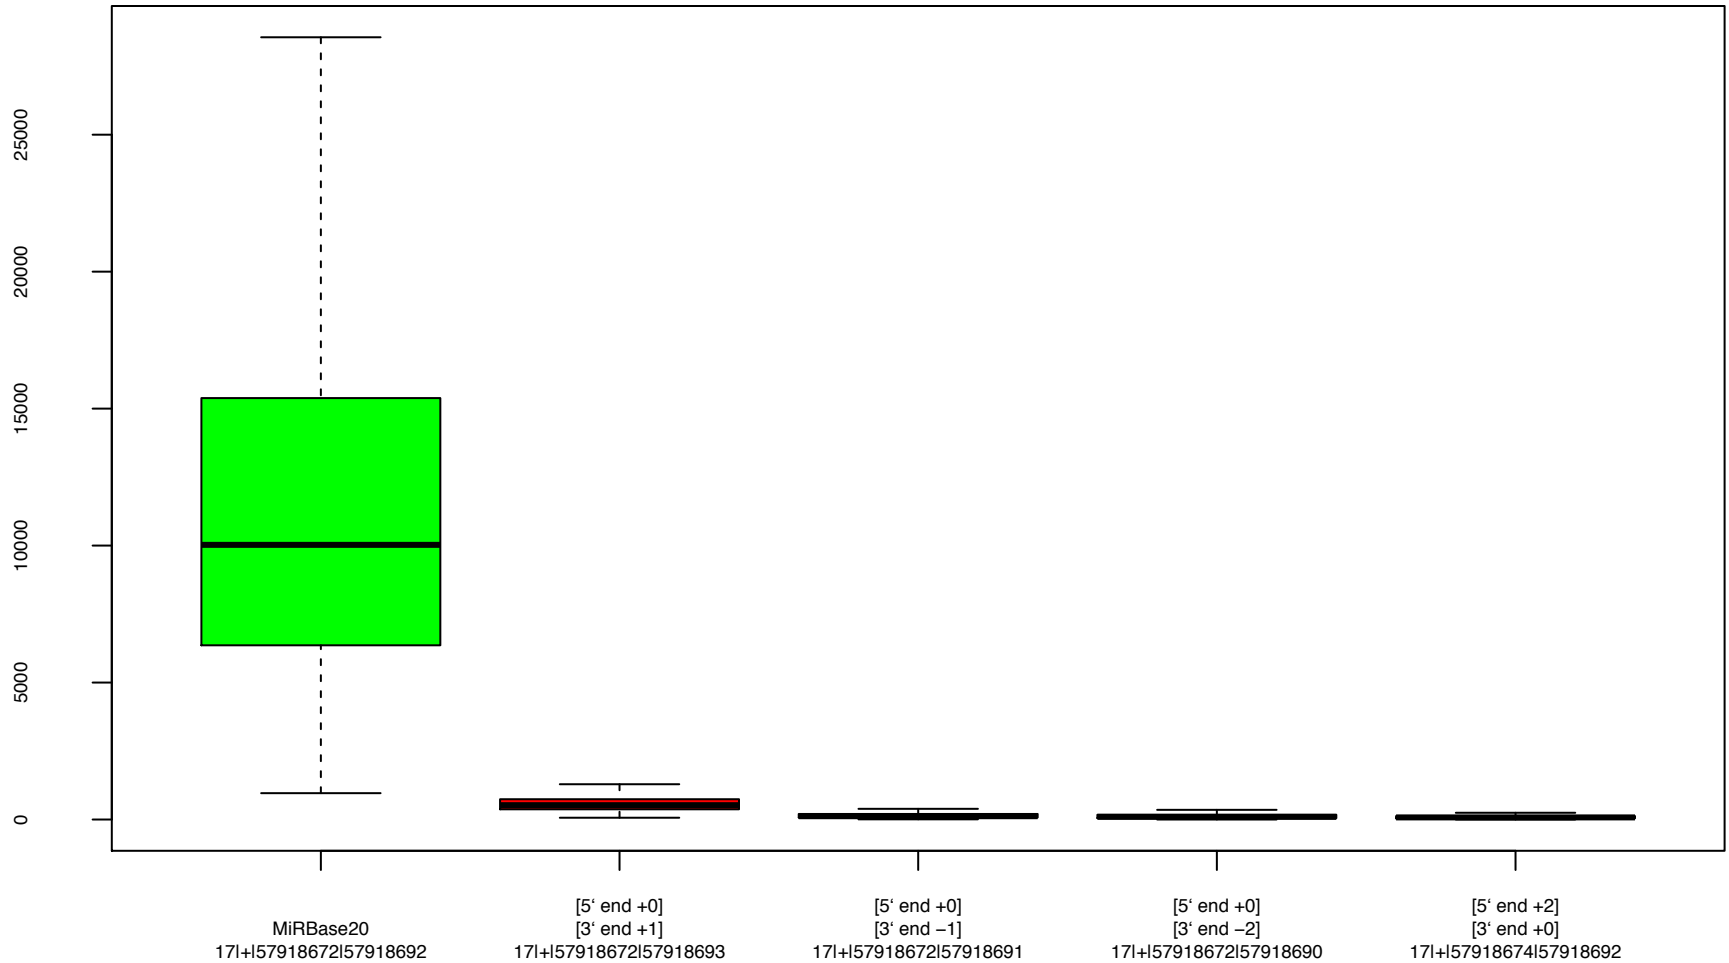

isomiRs

# MIMAT0000077=hsa-miR-22-3p=MI0000078

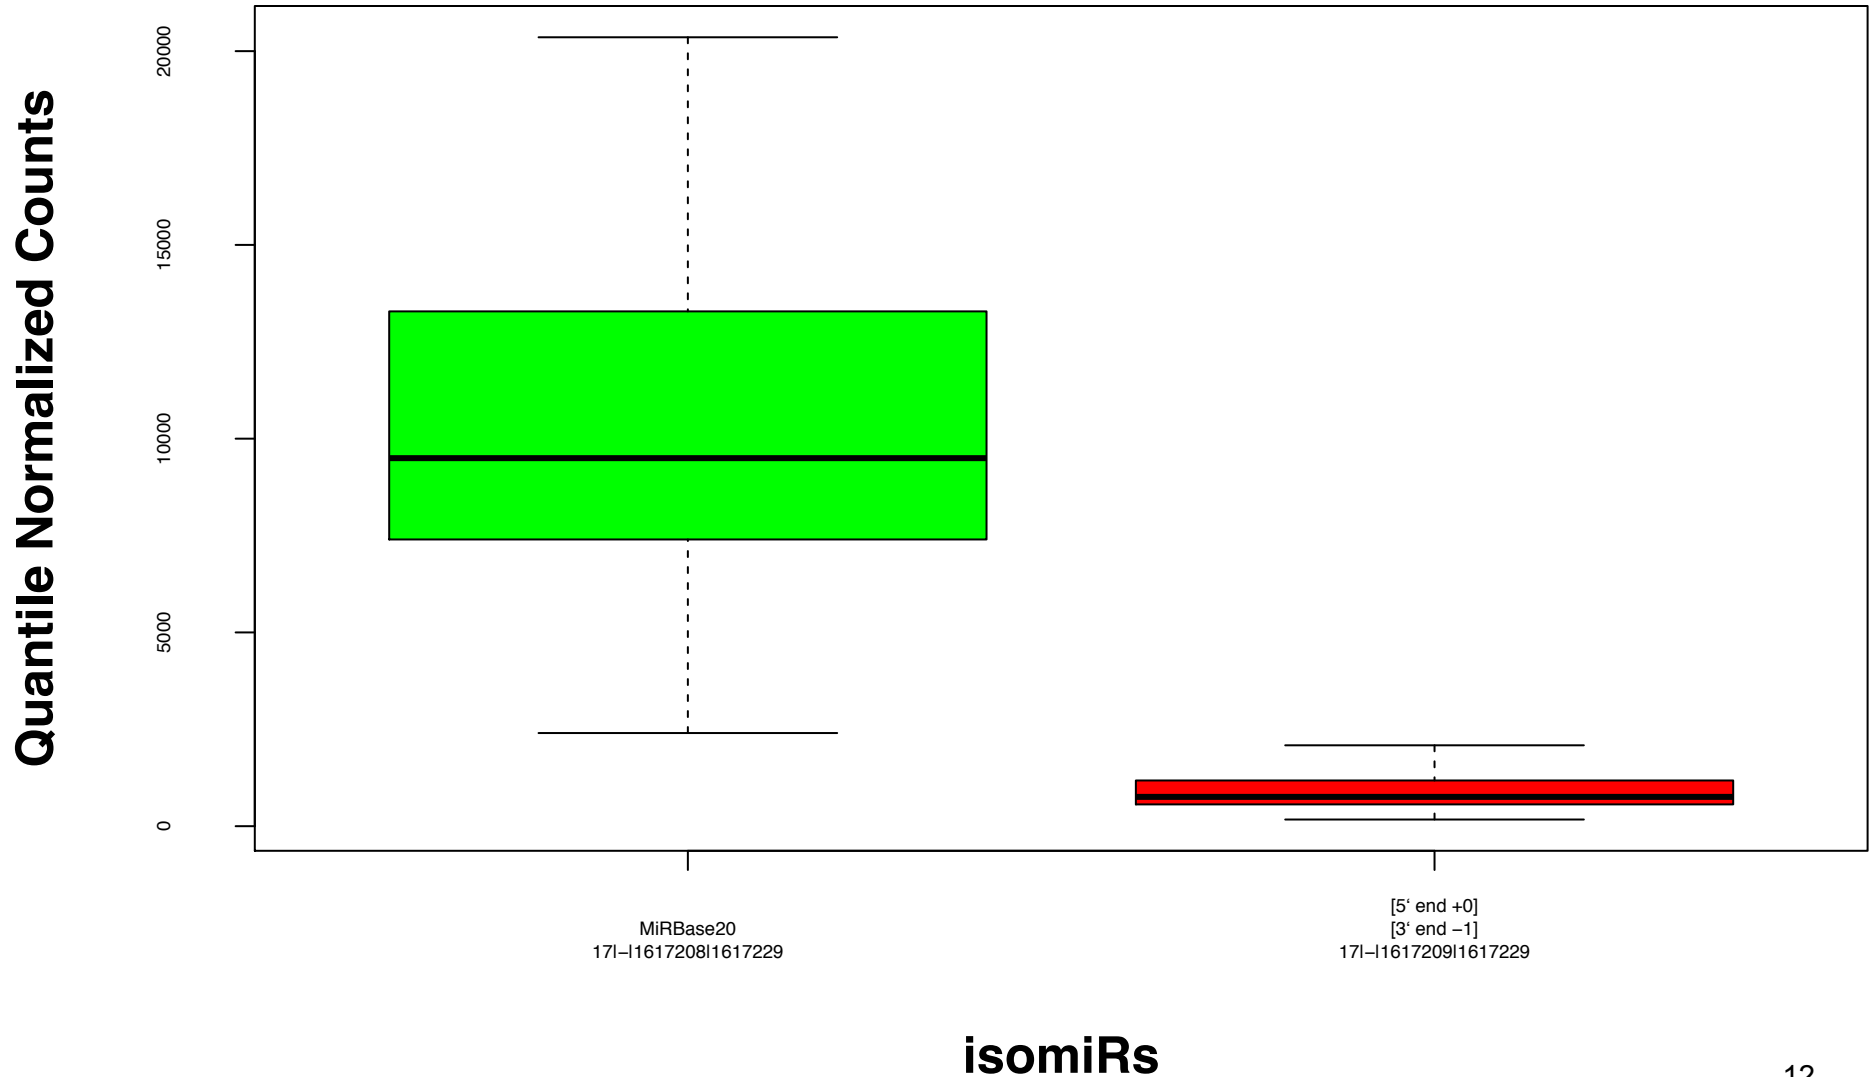

# MIMAT0000092=hsa-miR-92a-3p=MI0000093

Quantile Normalized Counts

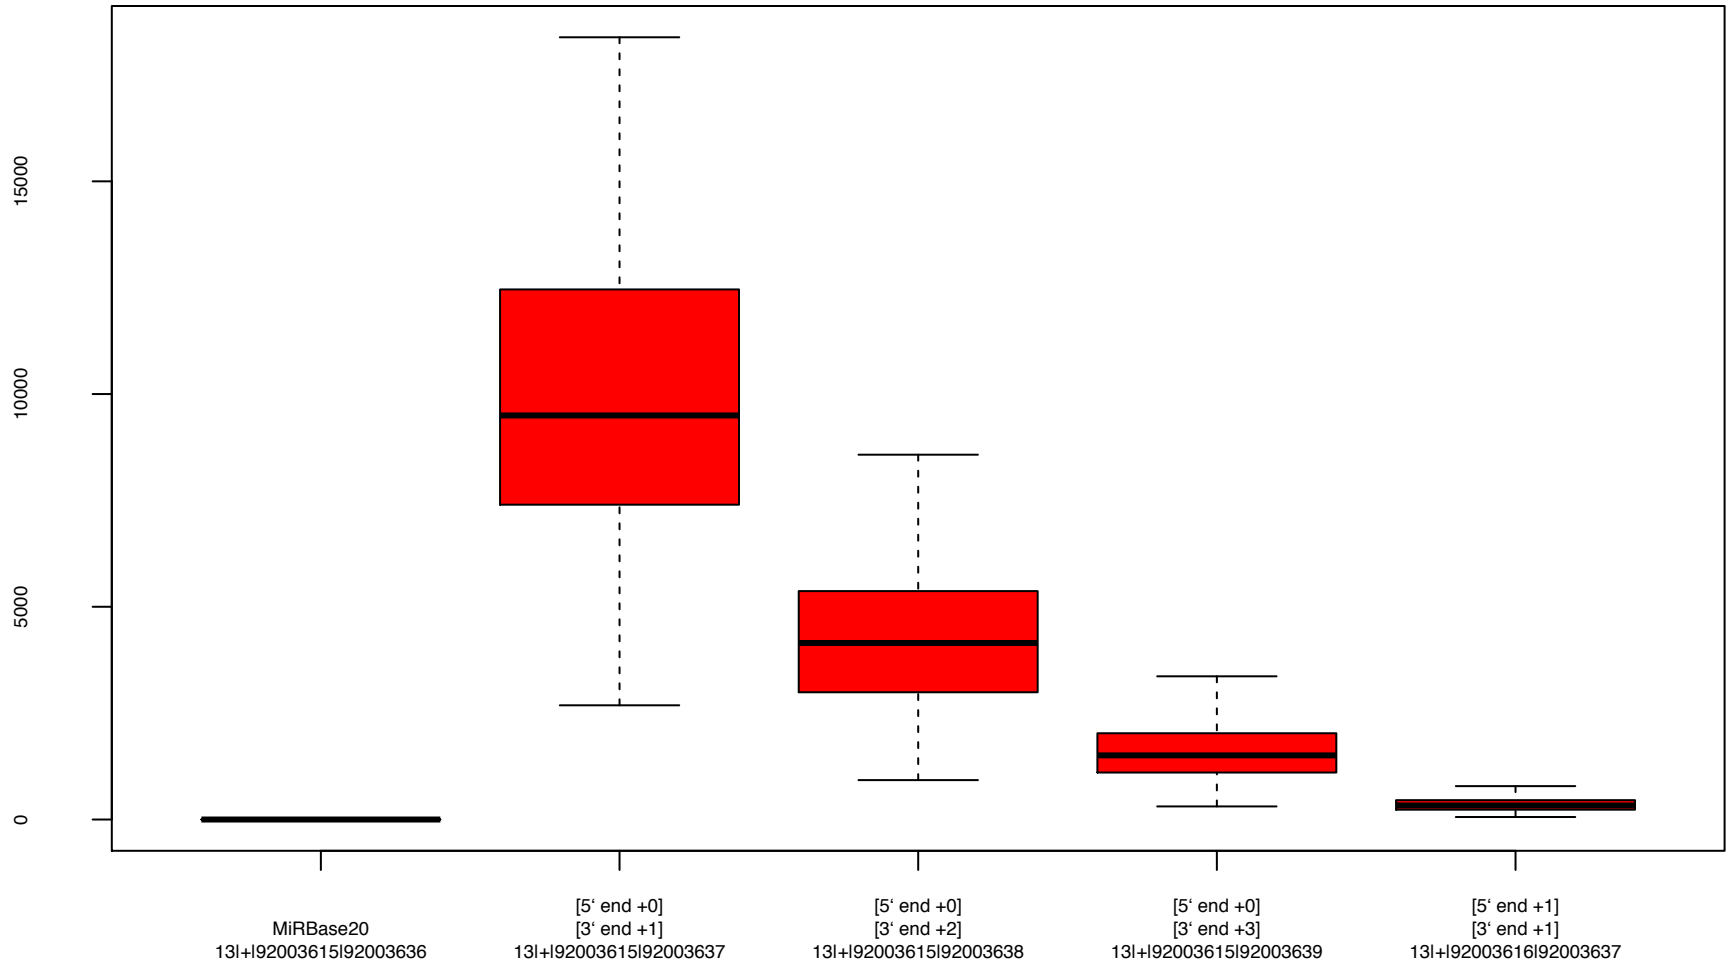

isomiRs

# MIMAT0000081=hsa-miR-25-3p=MI0000082

Quantile Normalized Counts

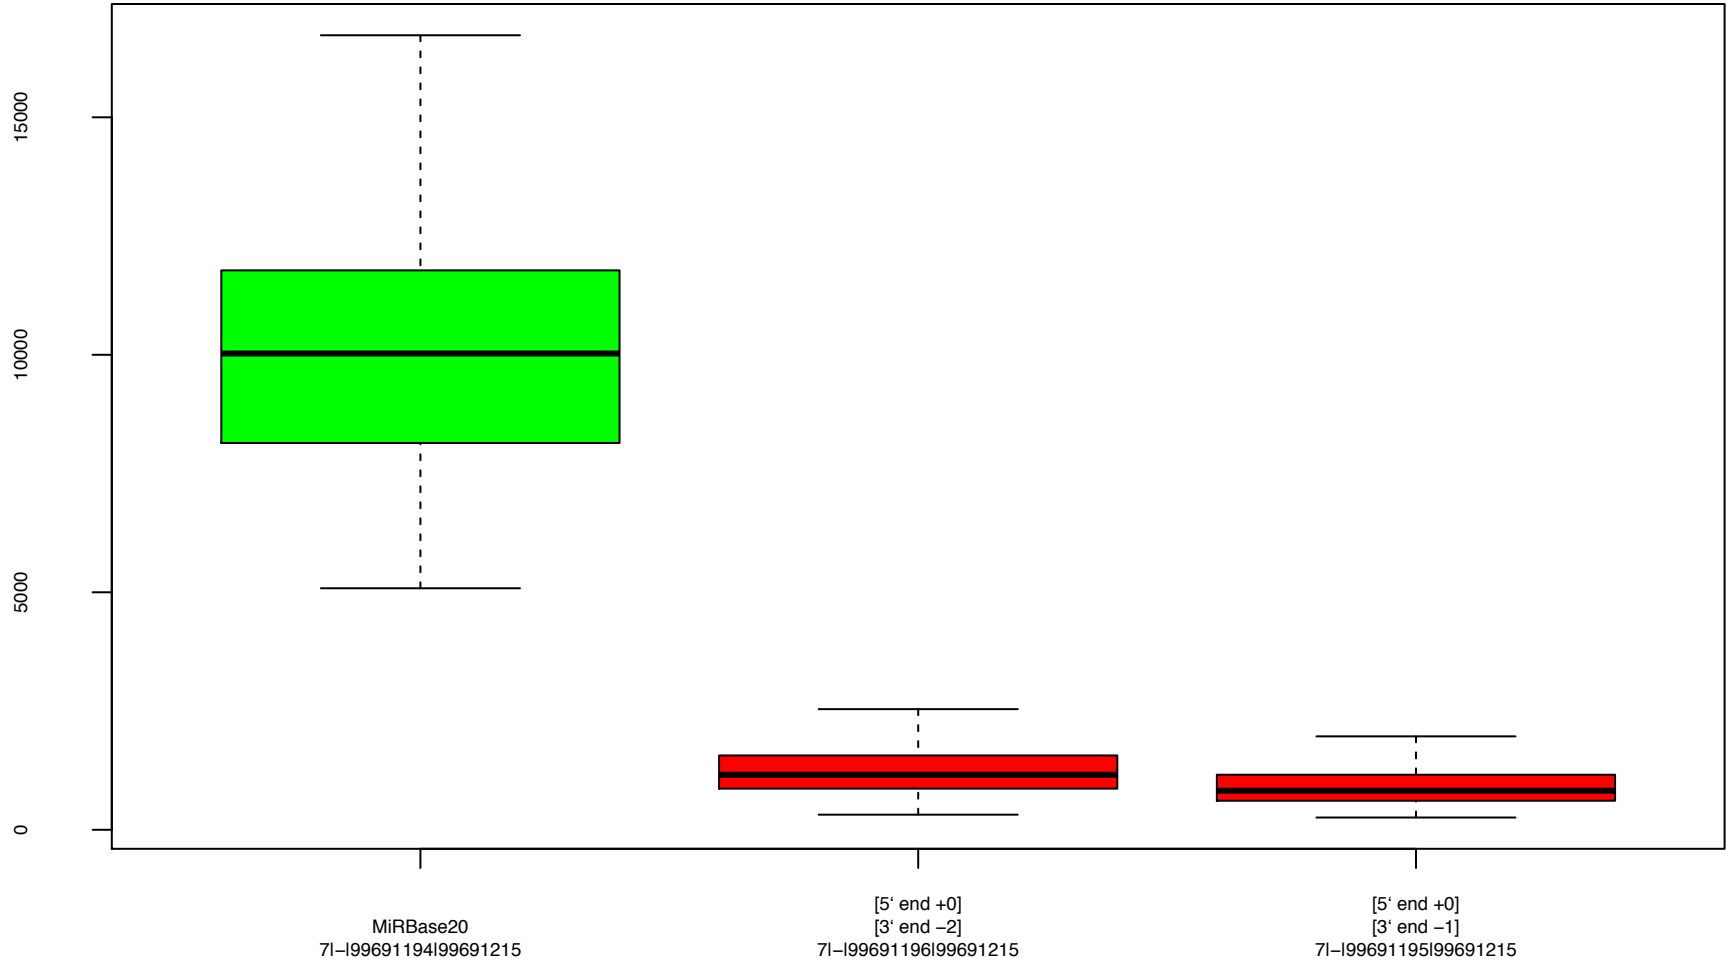

isomiRs

# MIMAT0000456=hsa-miR-186-5p=MI0000483

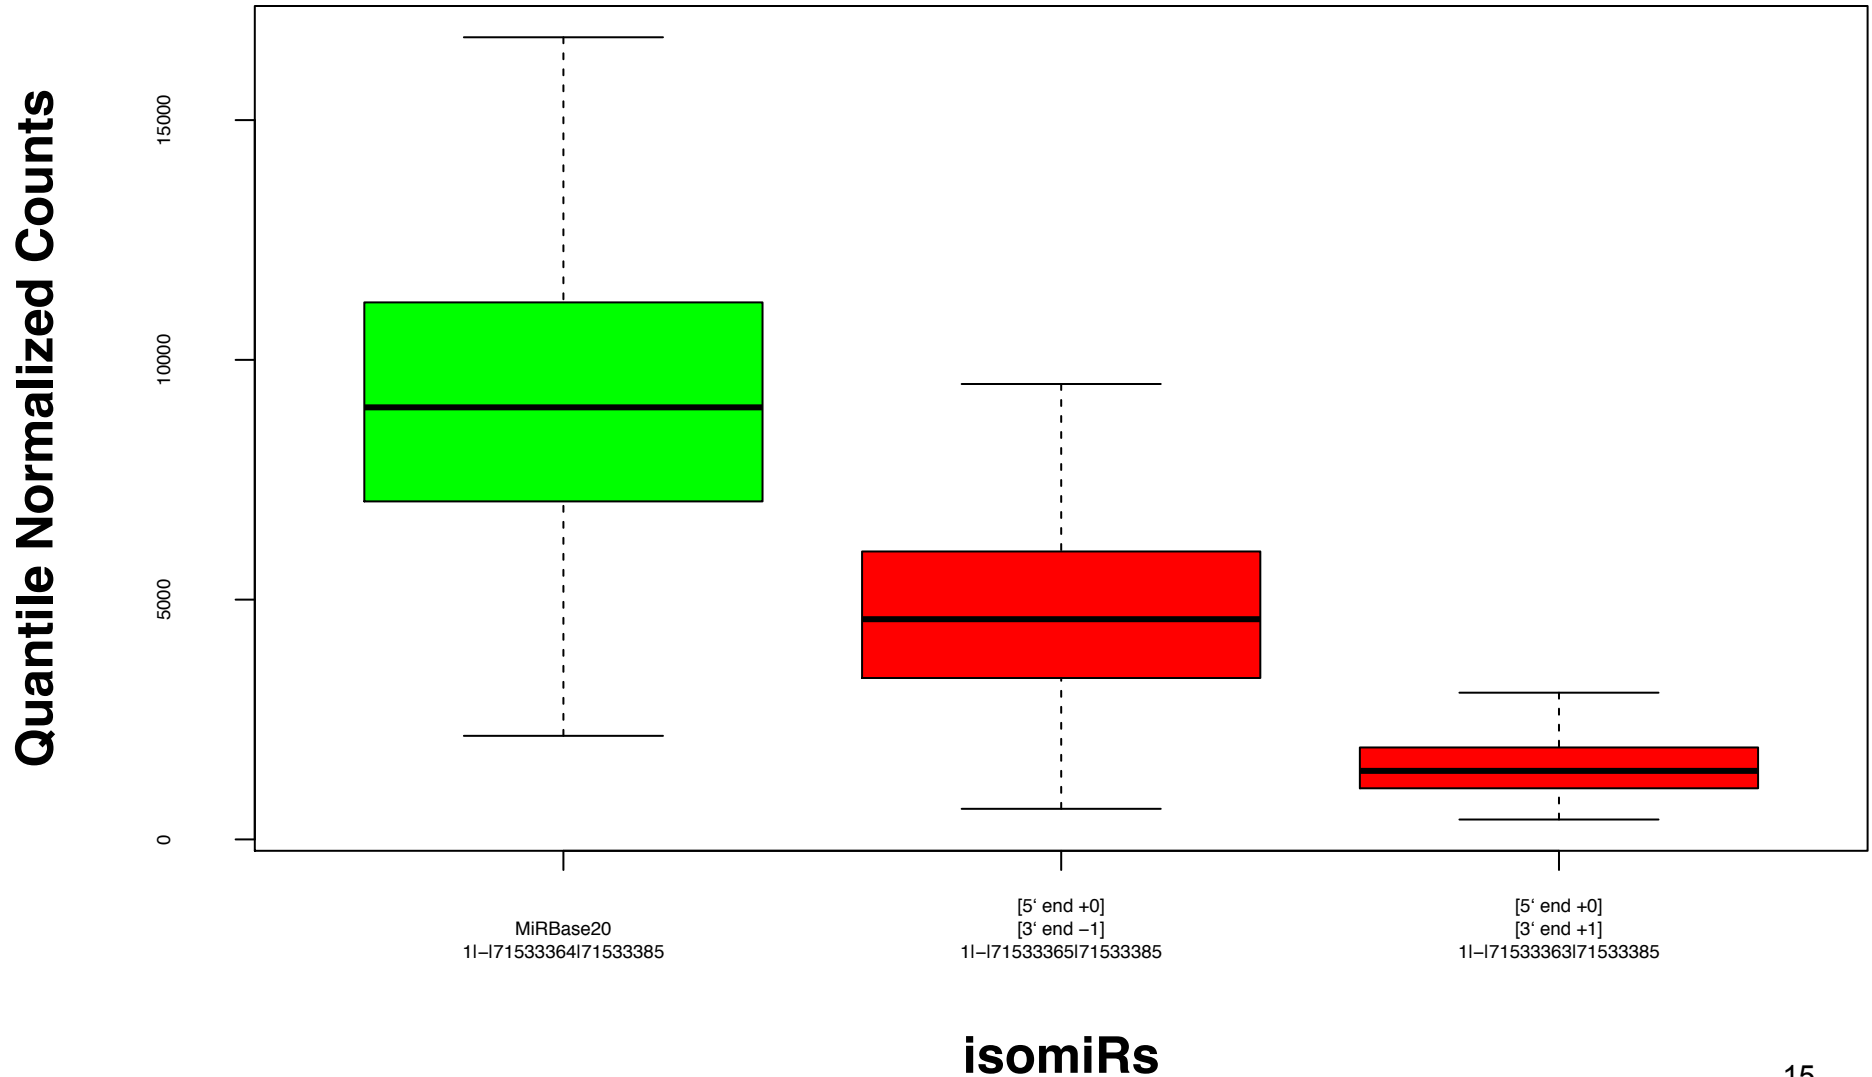



# MIMAT0000419=hsa-miR-27b-3p=MI0000440

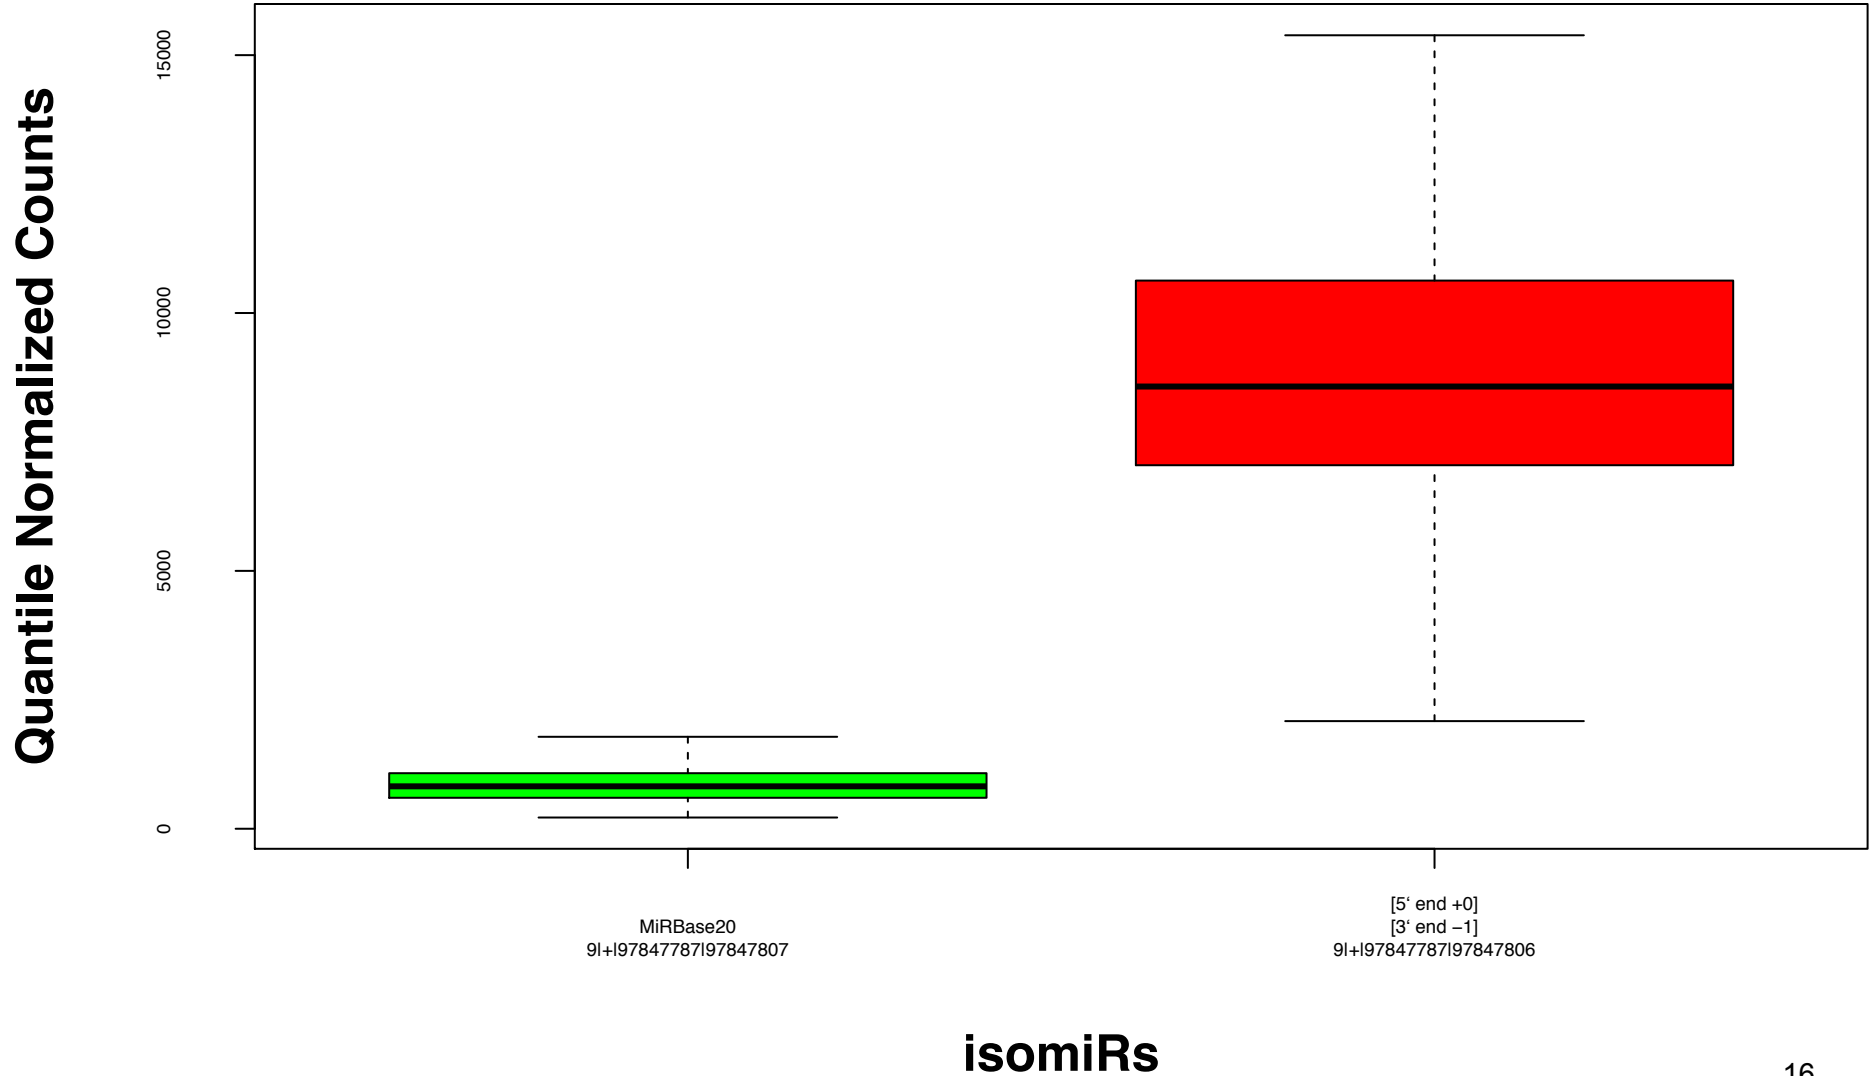

# MIMAT0000692=hsa-miR-30e-5p=MI0000749

Quantile Normalized Counts

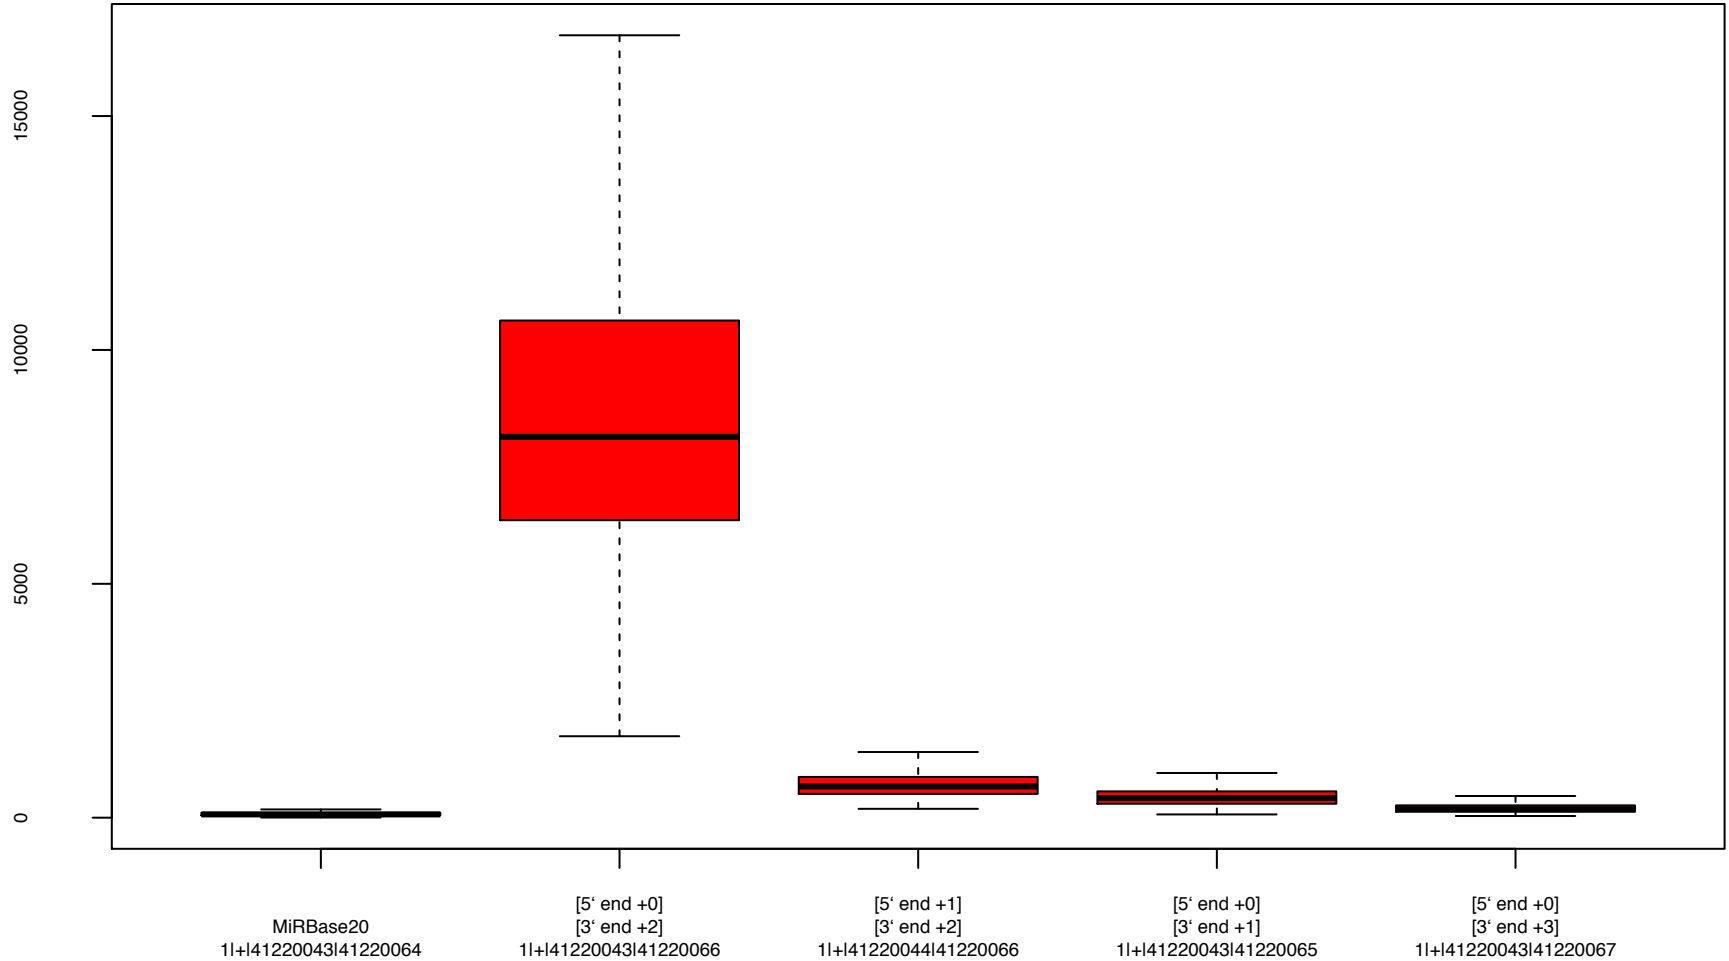

isomiRs

# MIMAT0000096=hsa-miR-98-5p=MI0000100

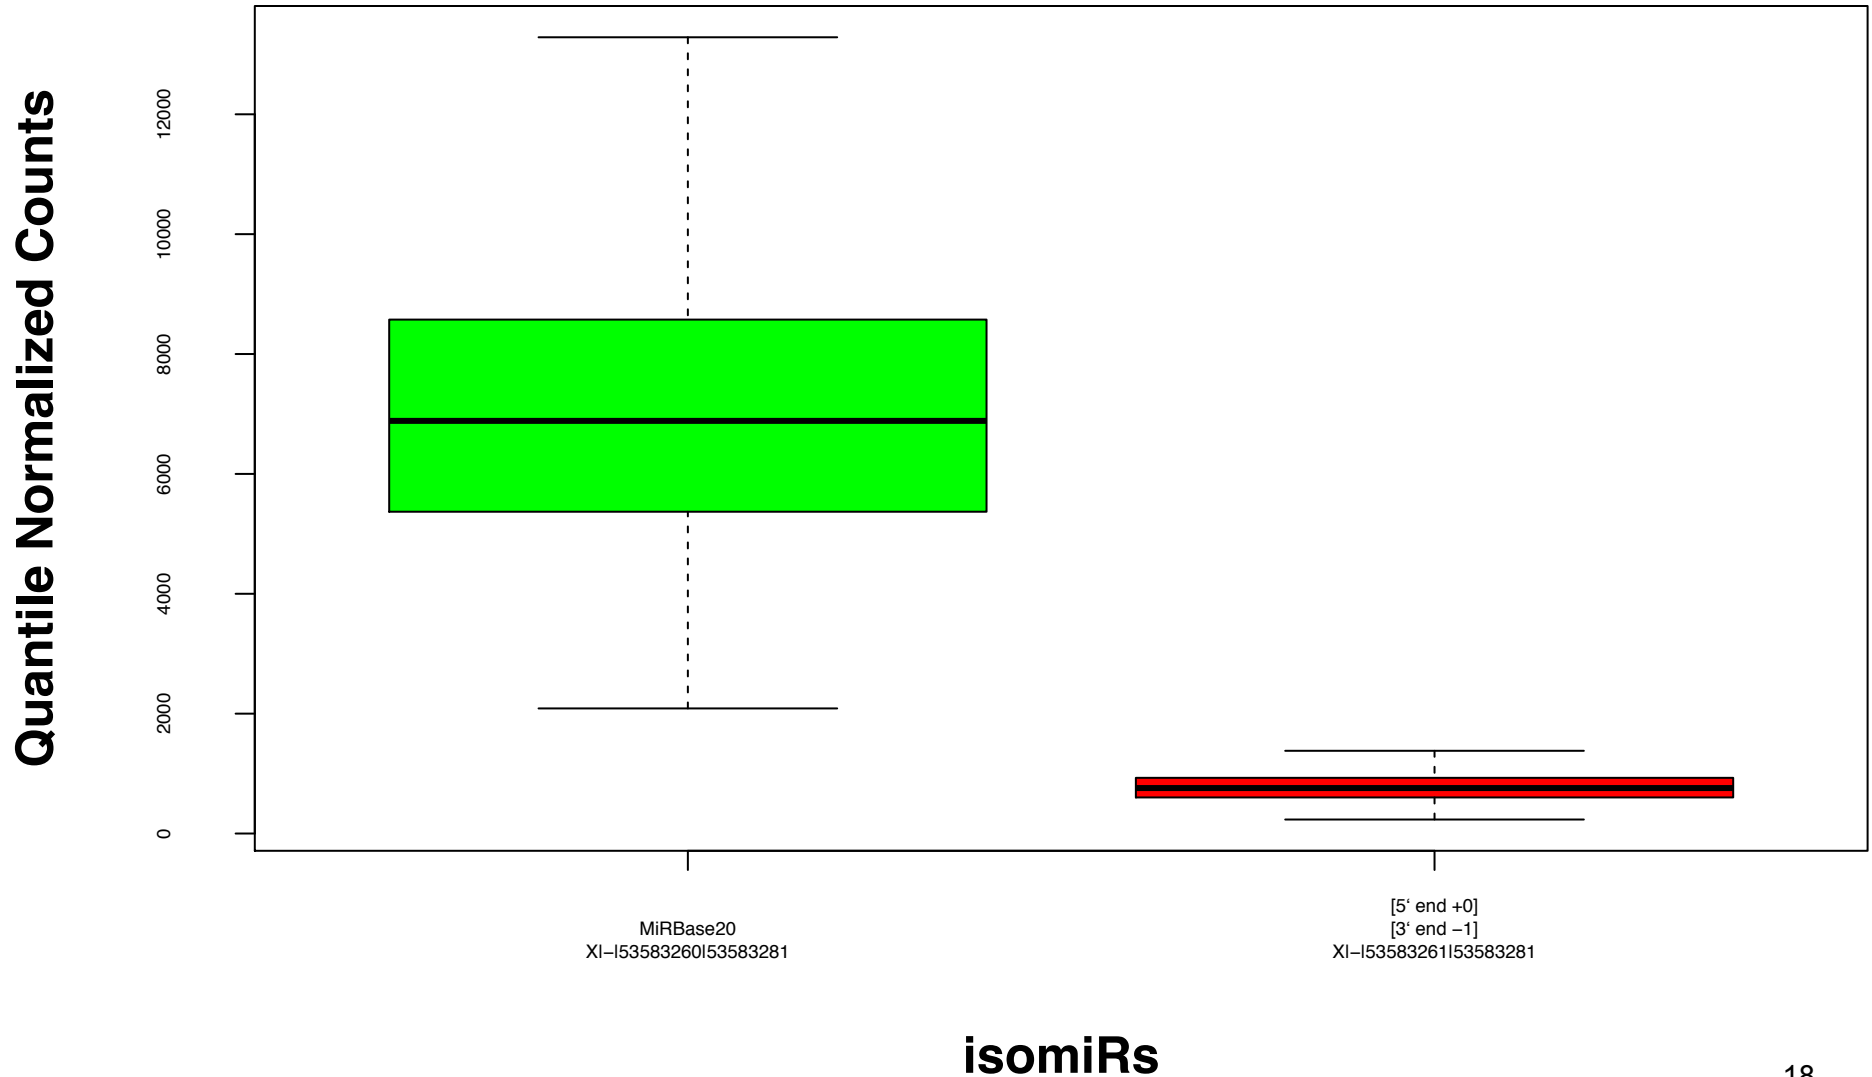

# MIMAT0000415=hsa-let-7i-5p=MI0000434

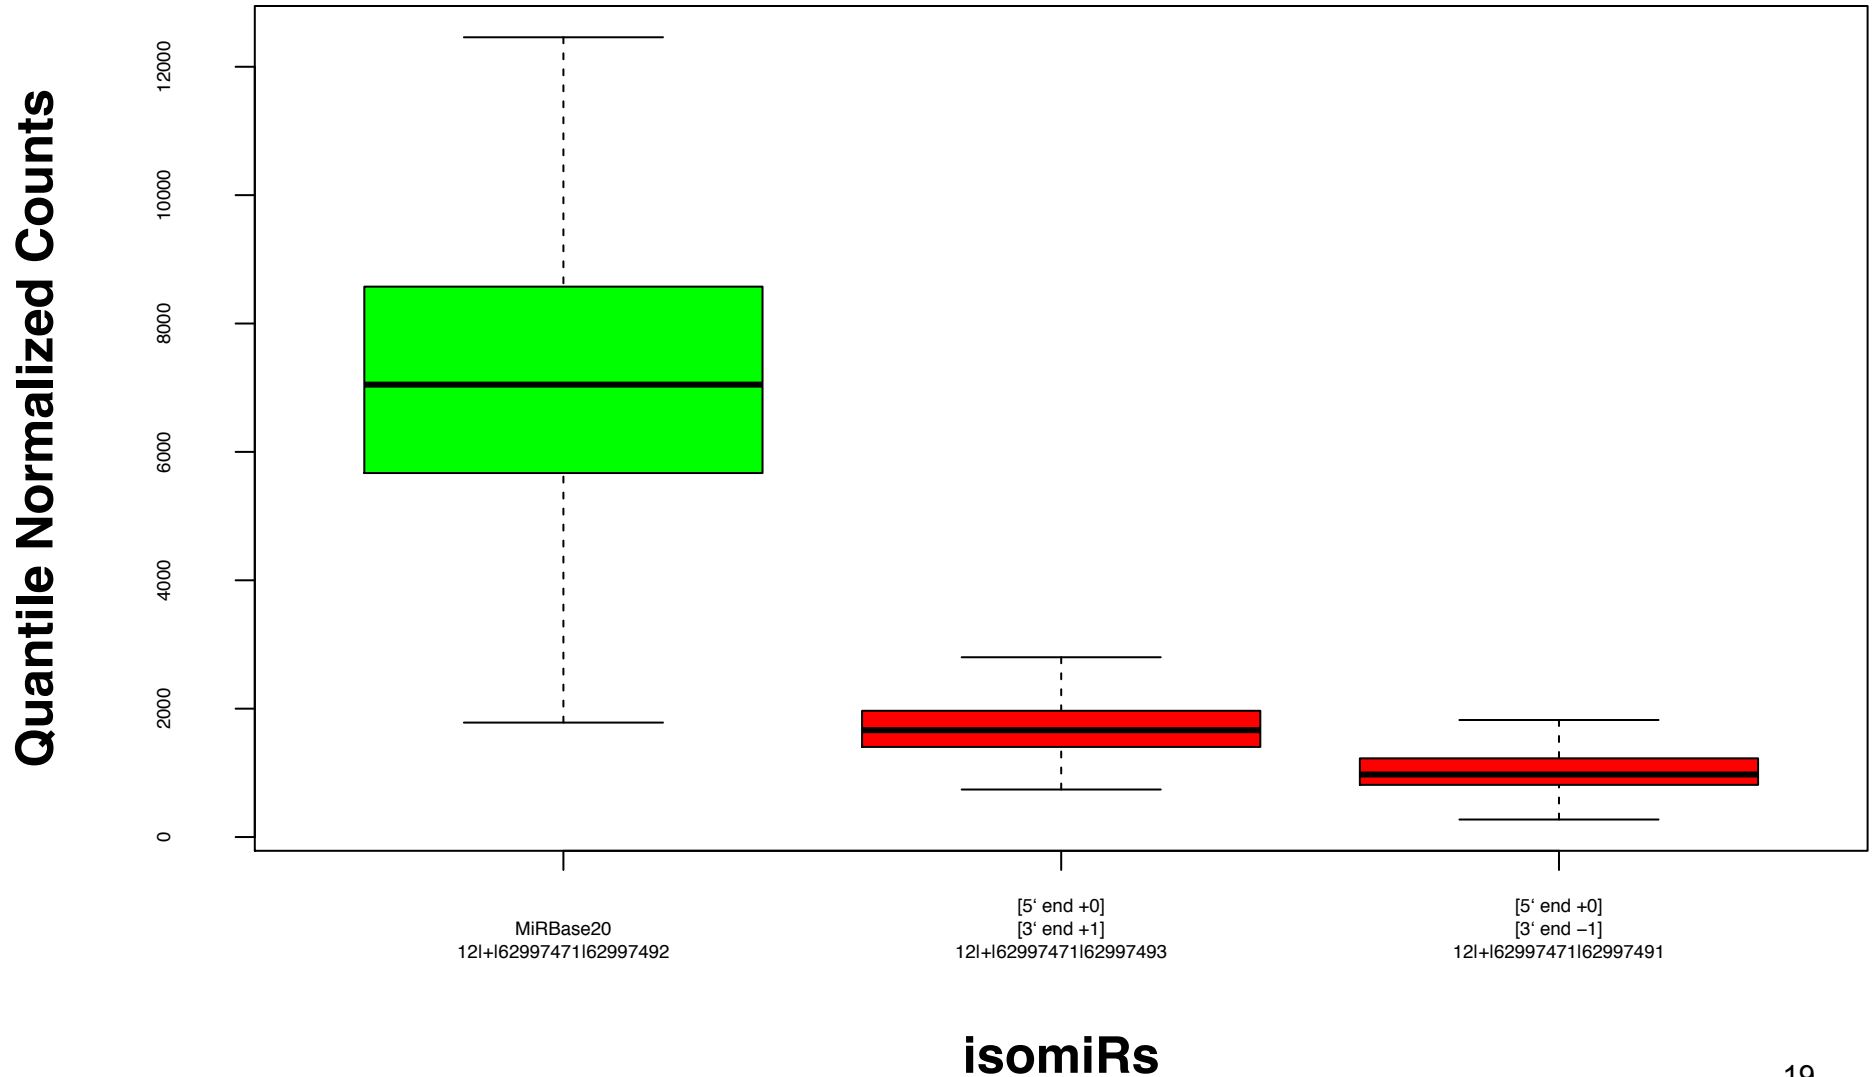

# MIMAT0000222=hsa-miR-192-5p=MI0000234

Quantile Normalized Counts

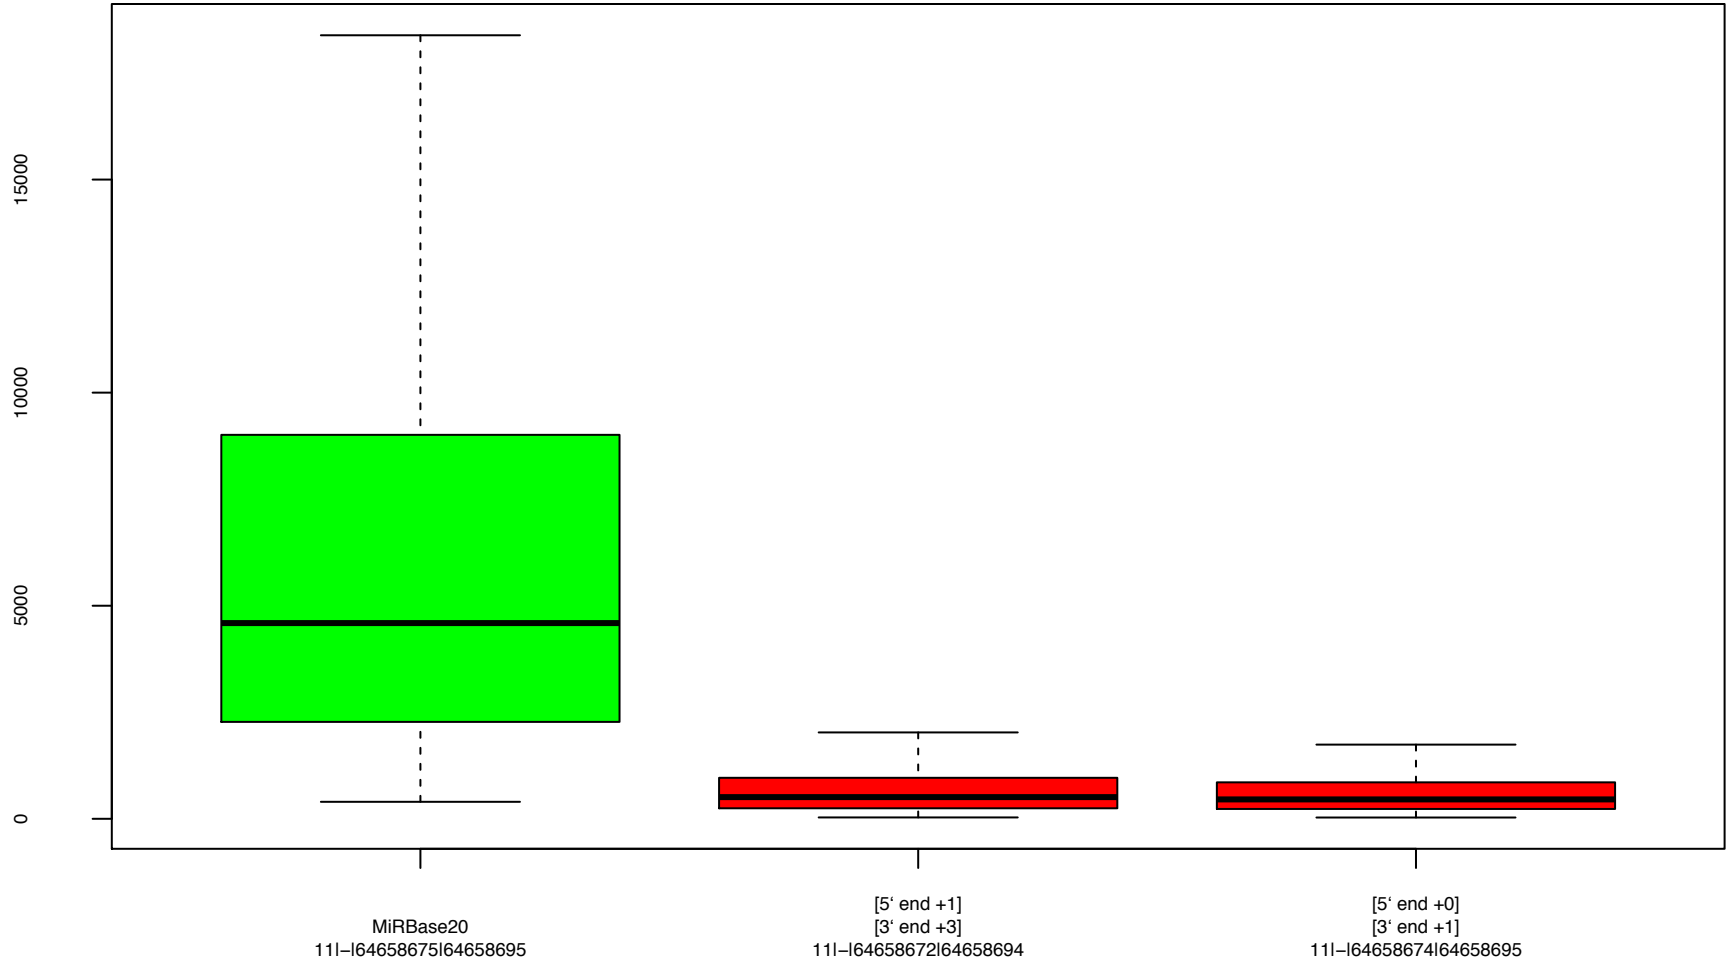

isomiRs

# MIMAT0000065=hsa-let-7d-5p=MI0000065

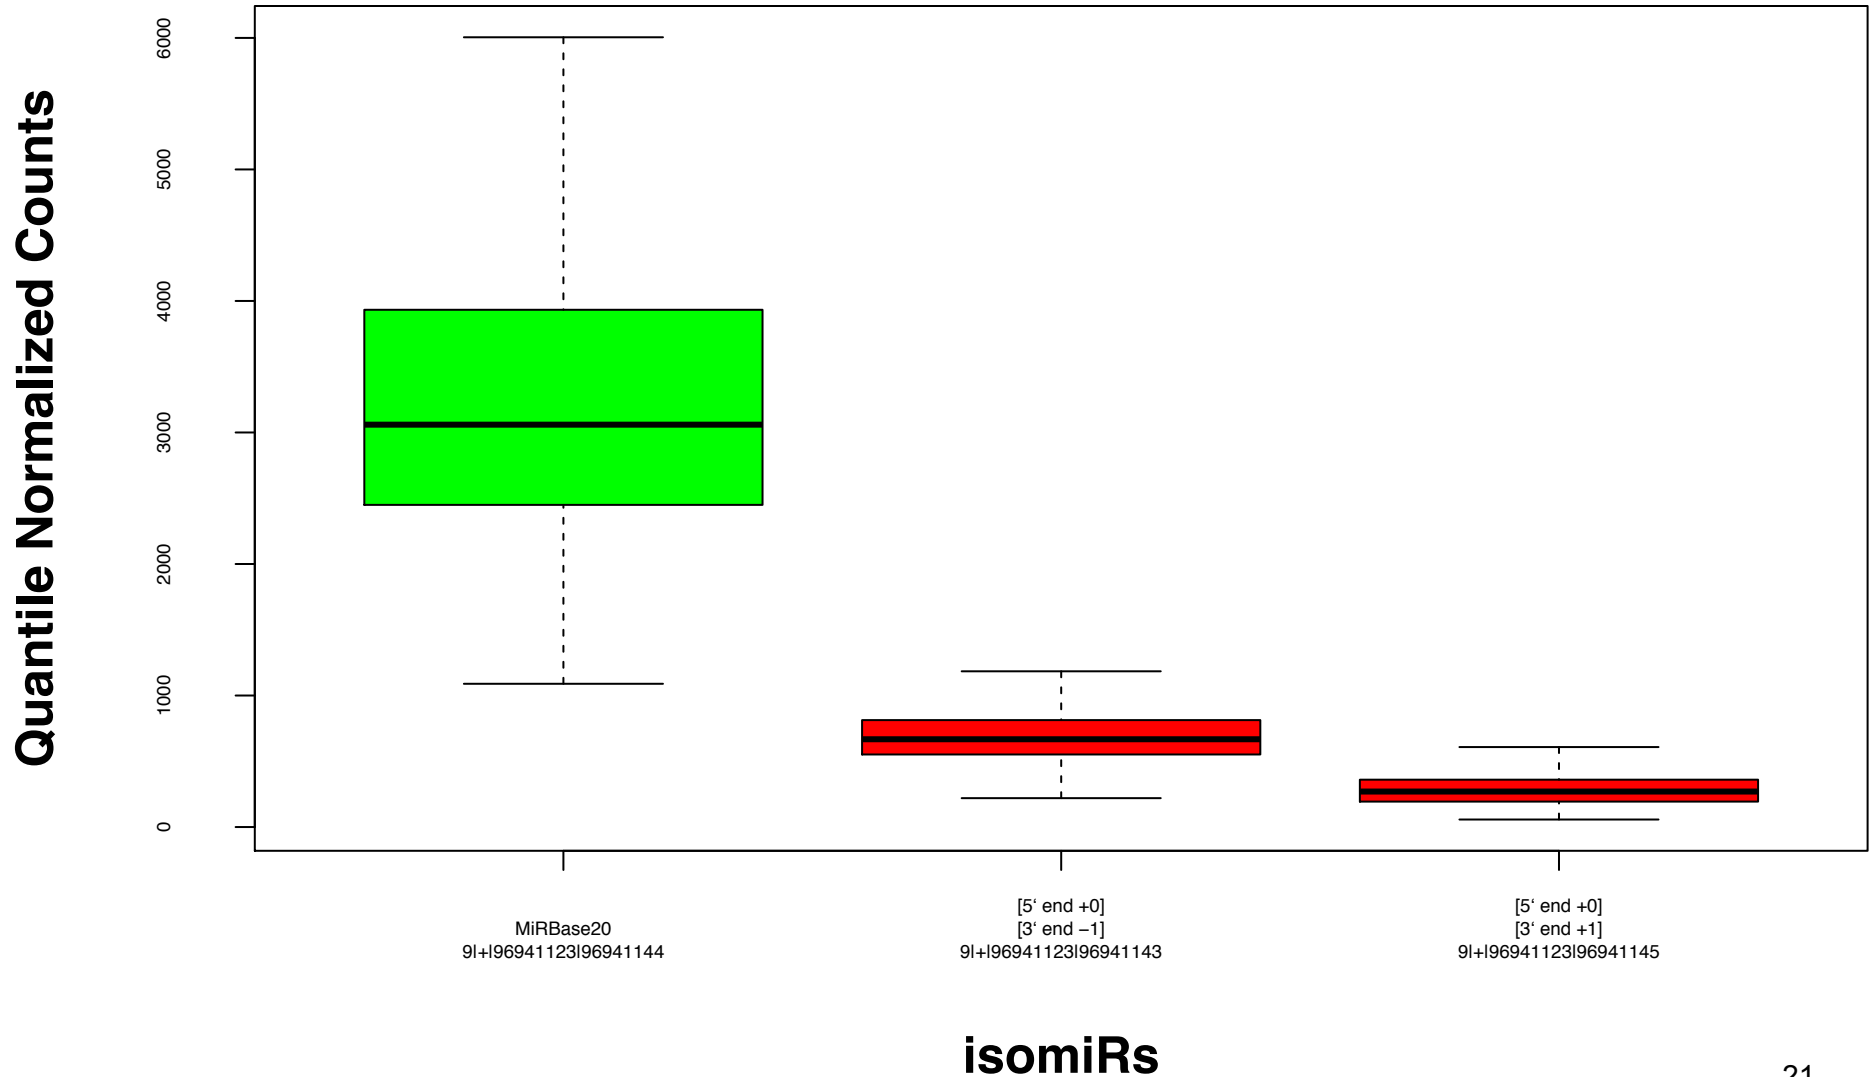

# MIMAT0001340=hsa-miR-423-3p=MI0001445

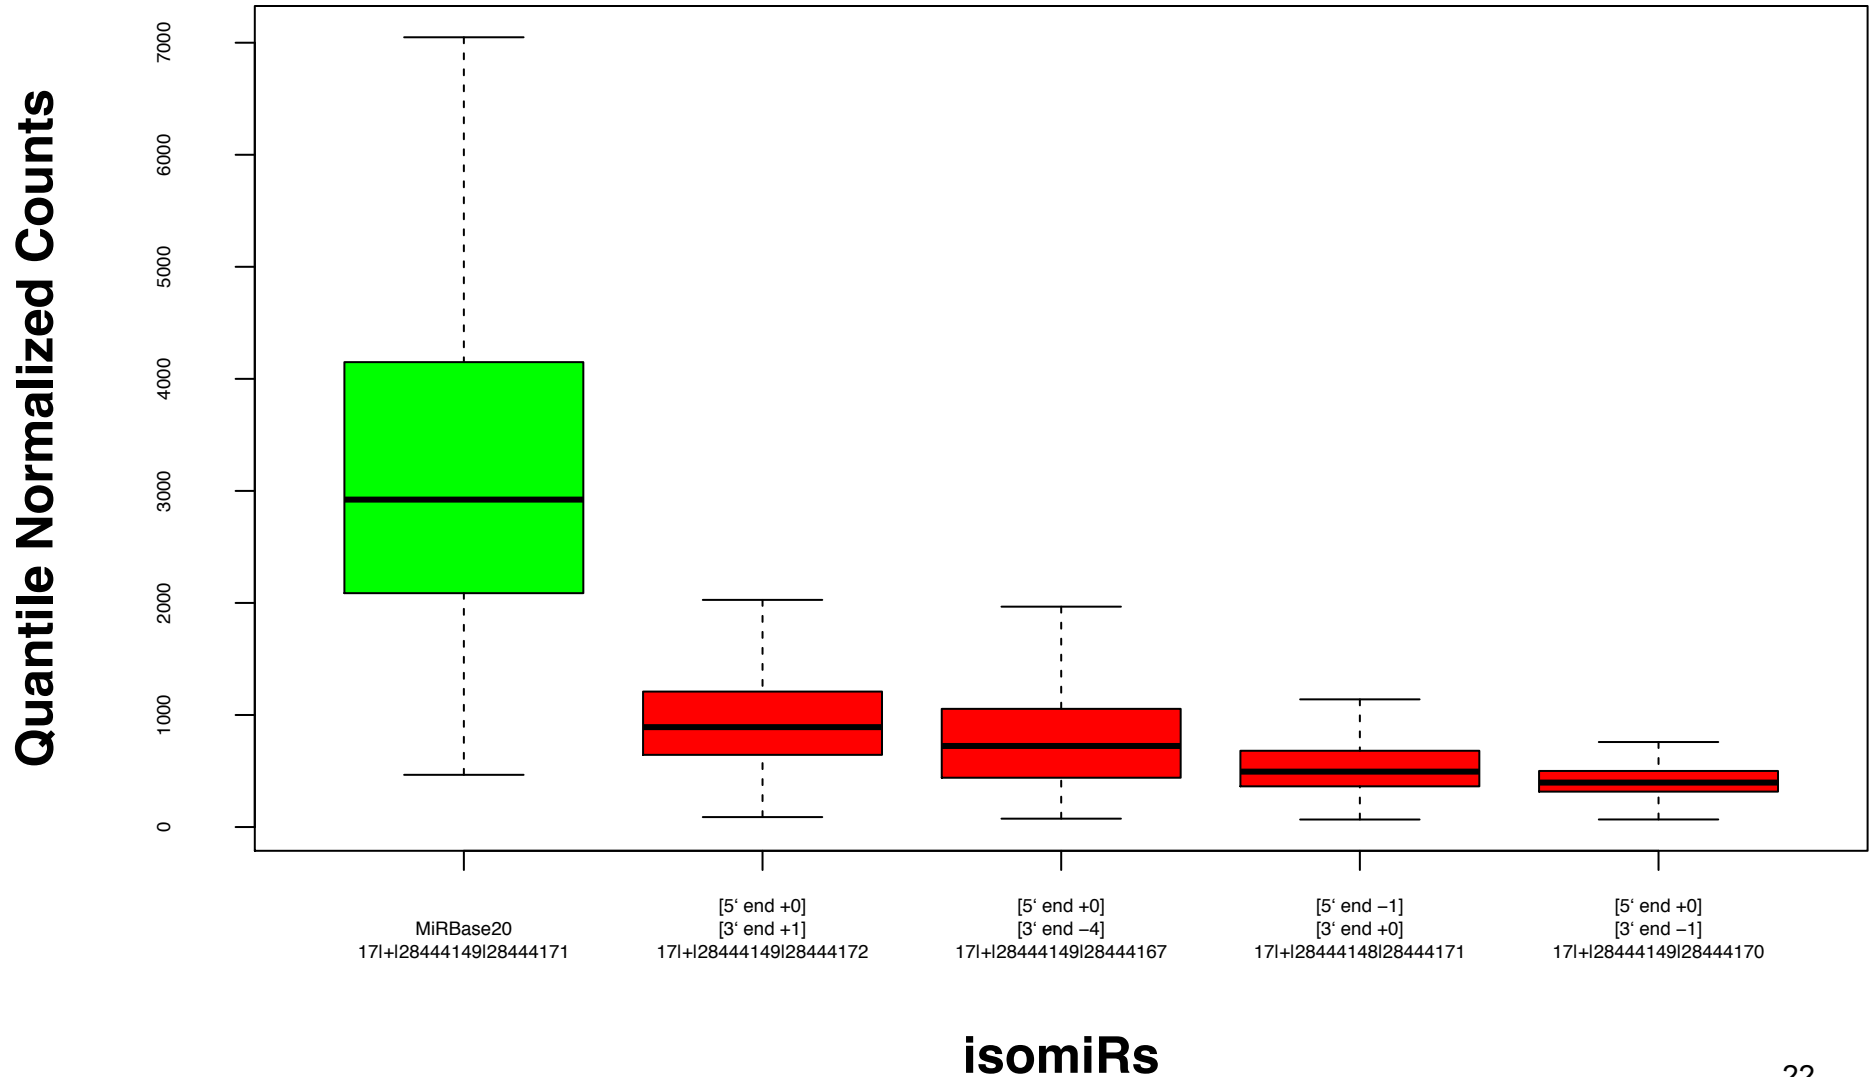

# MIMAT0004748=hsa-miR-423-5p=MI0001445

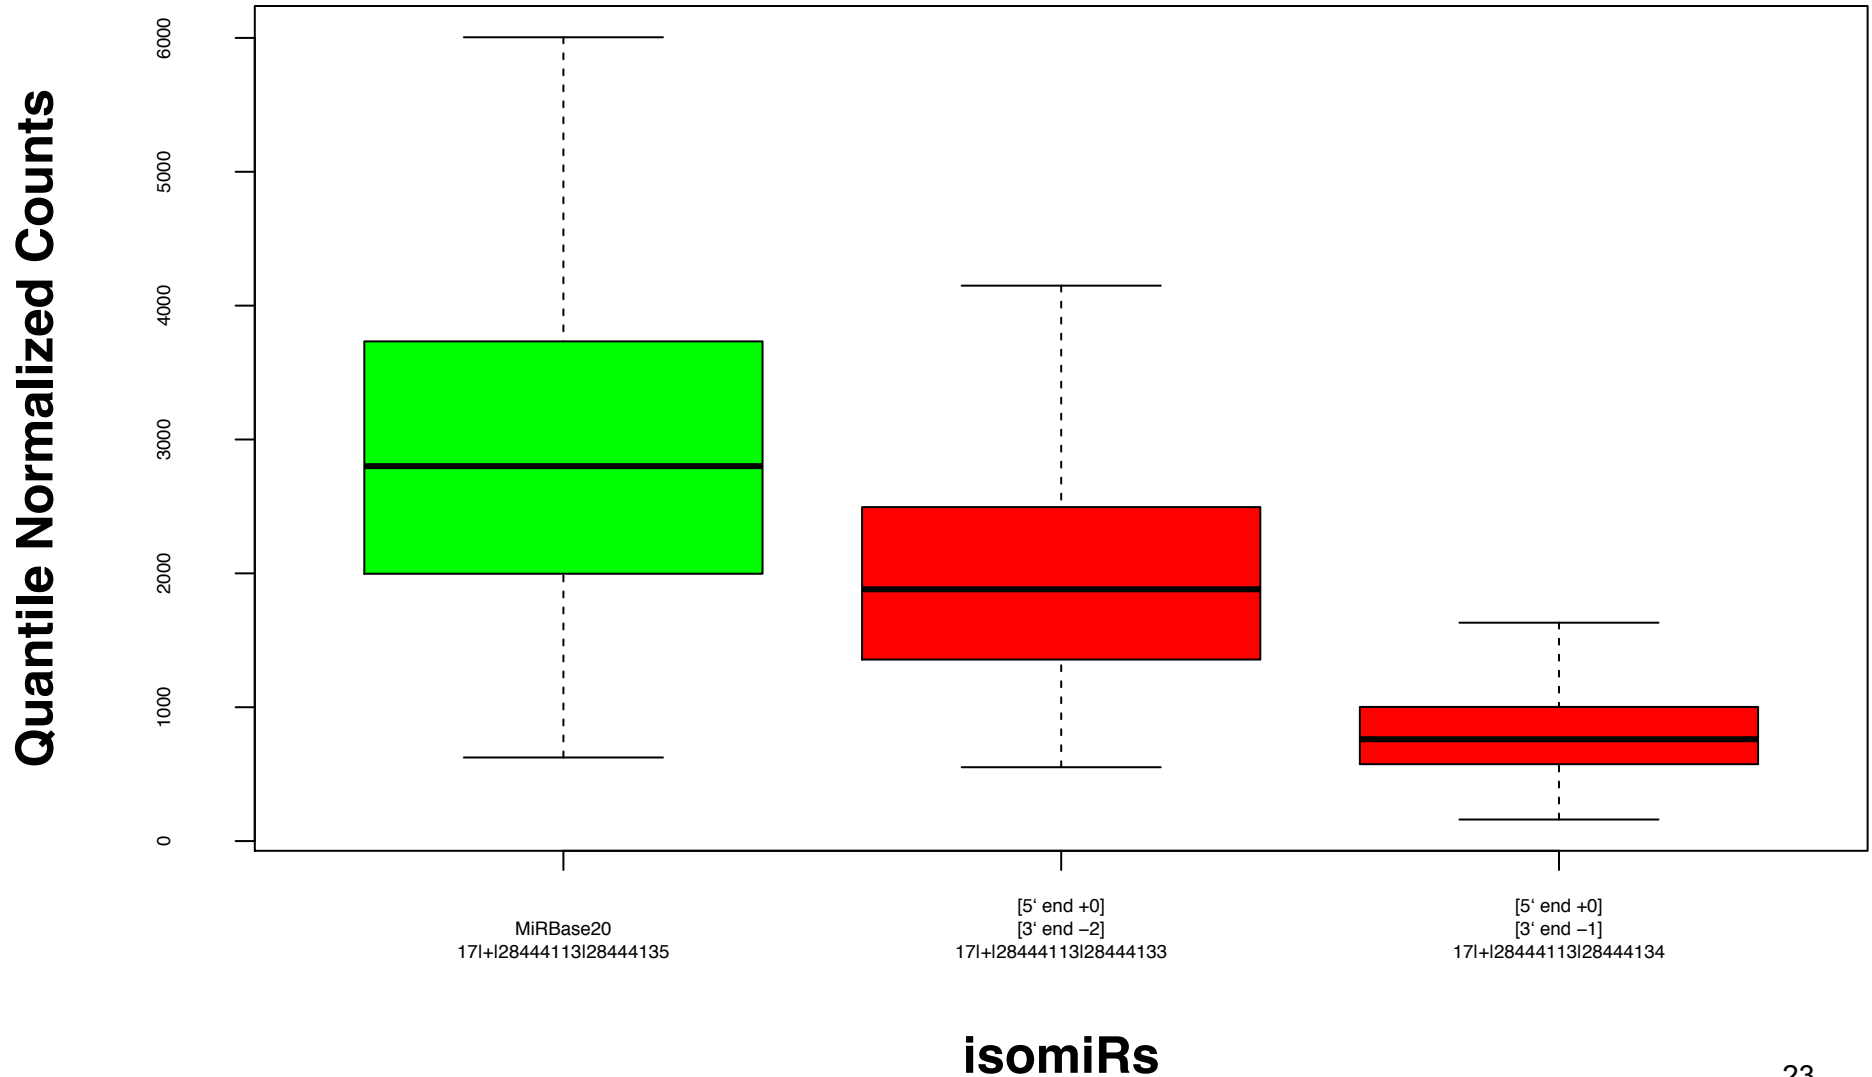



# MIMAT0004549=hsa-miR-148a-5p=MI0000253

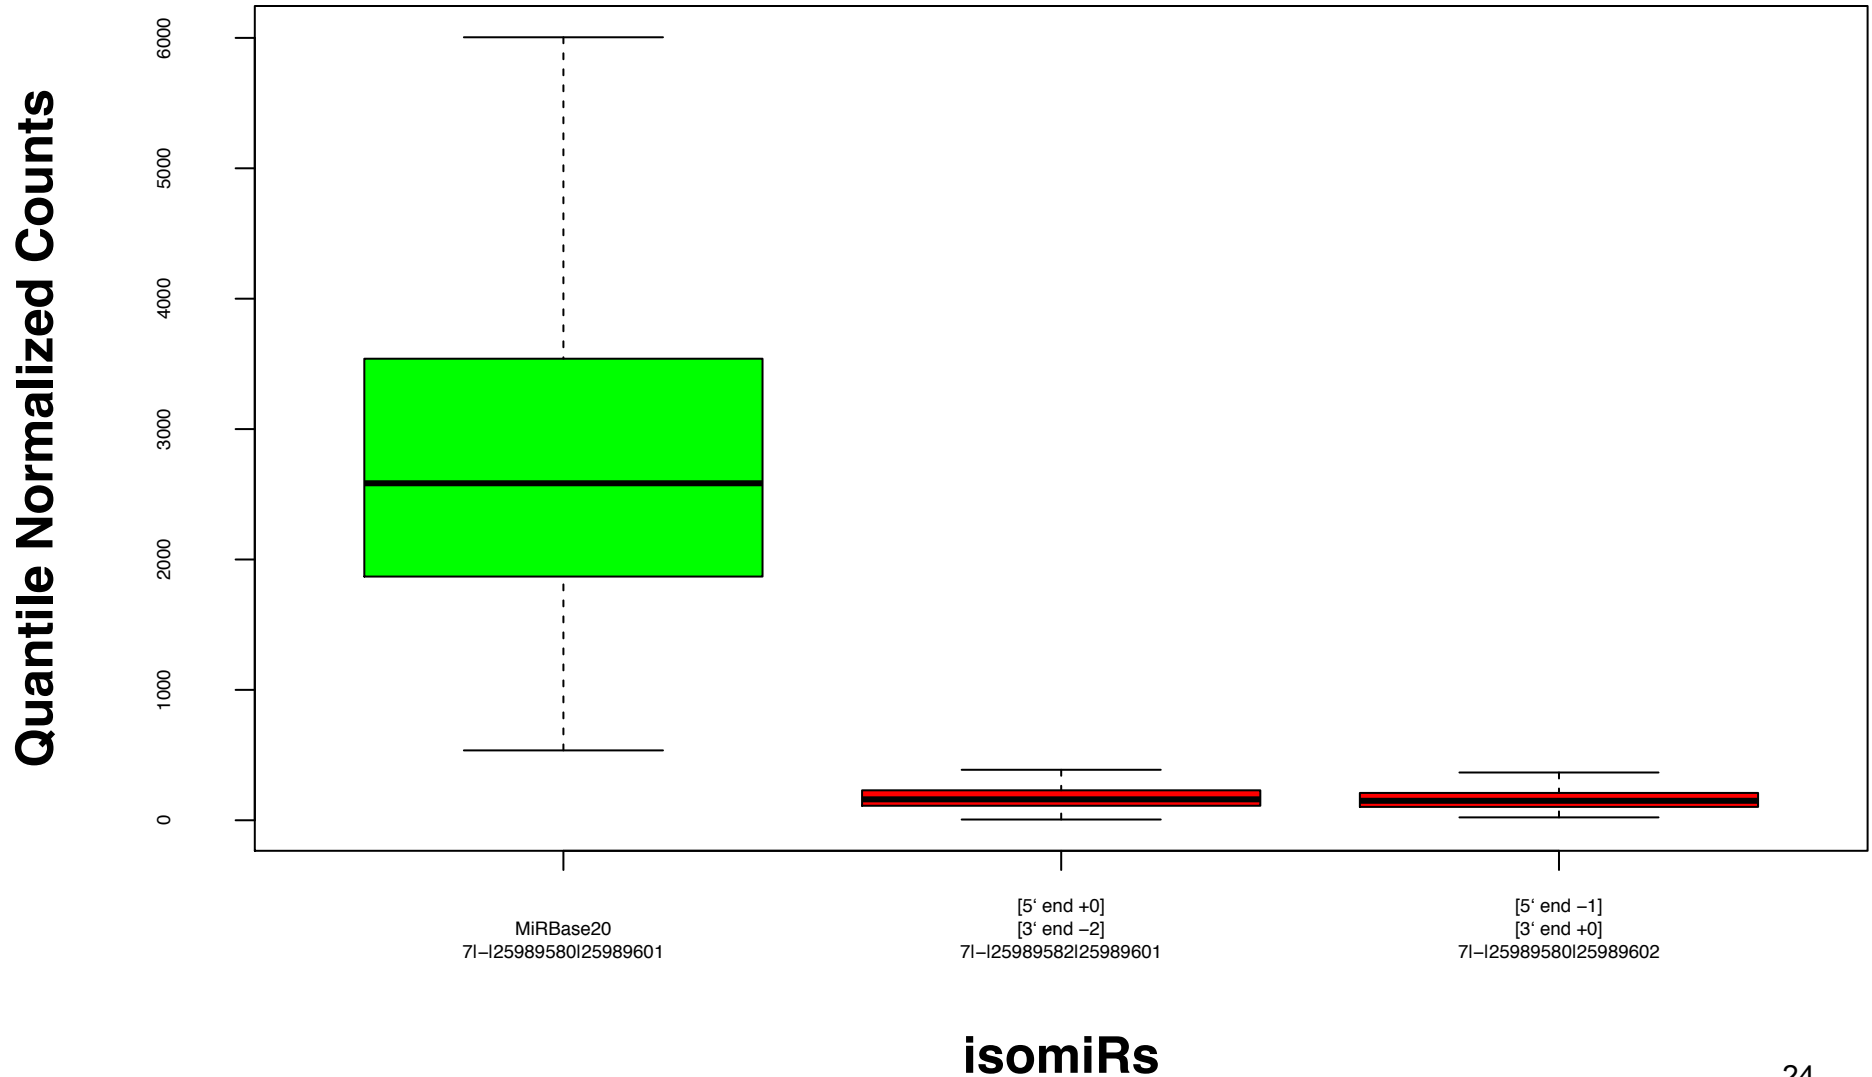

# MIMAT0000083=hsa-miR-26b-5p=MI0000084

Quantile Normalized Counts

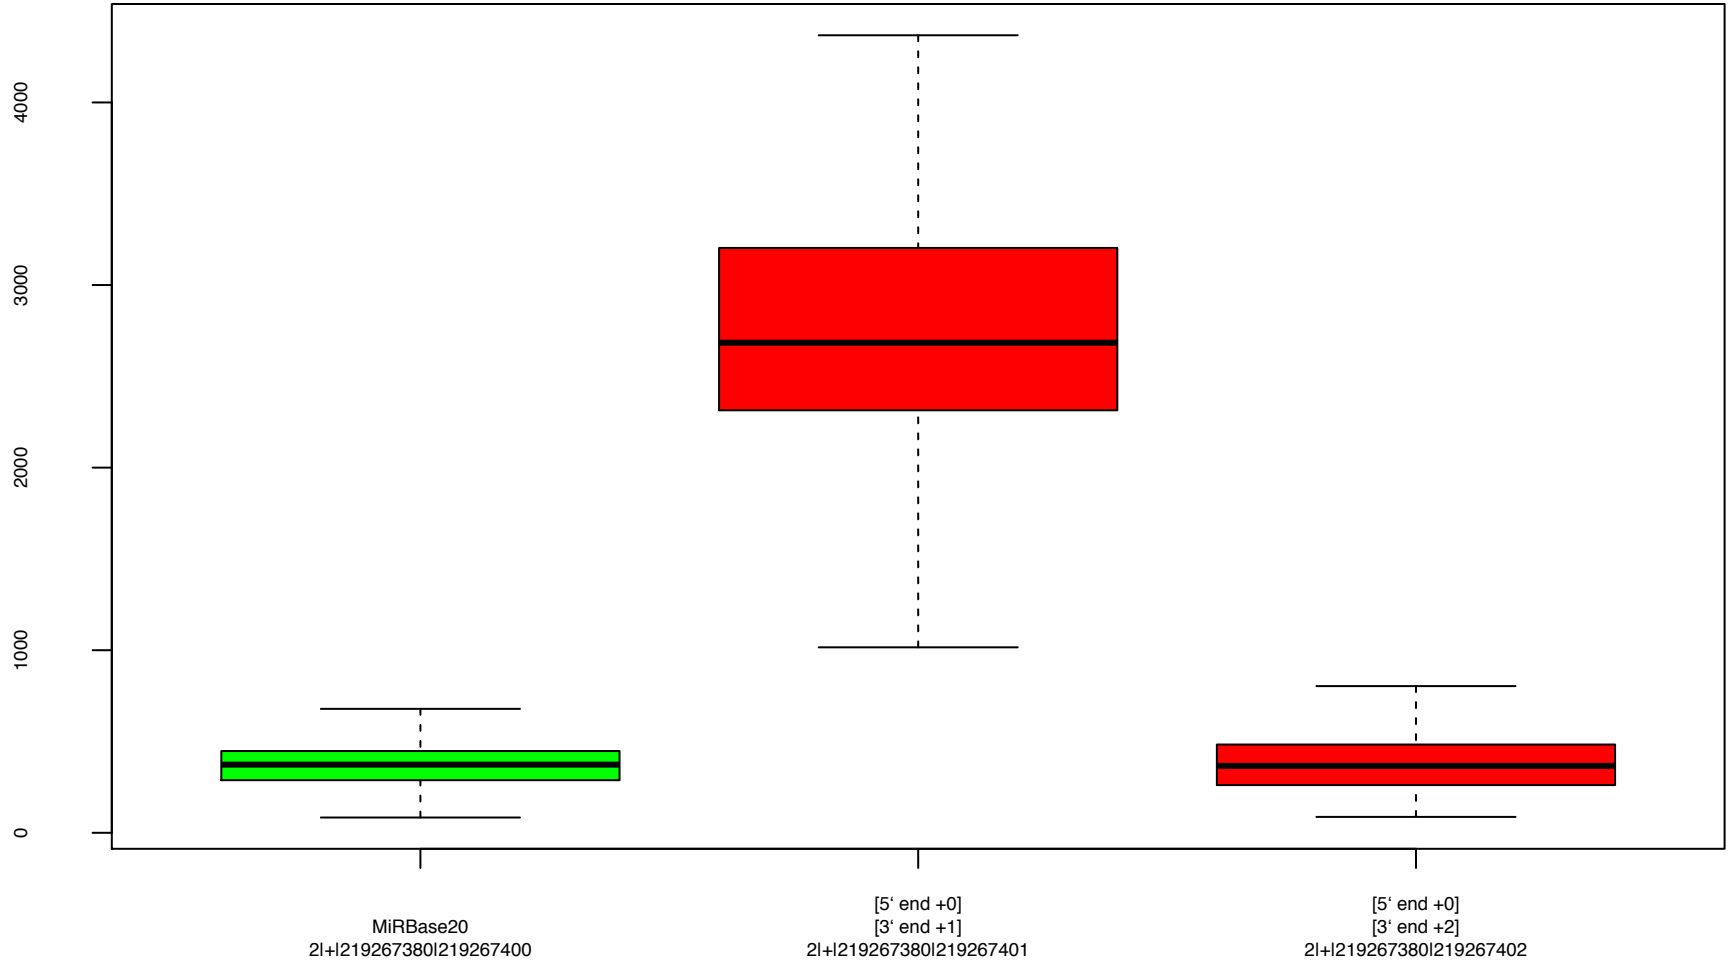

isomiRs

# MIMAT0002819=hsa-miR-193b-3p=MI0003137

Quantile Normalized Counts

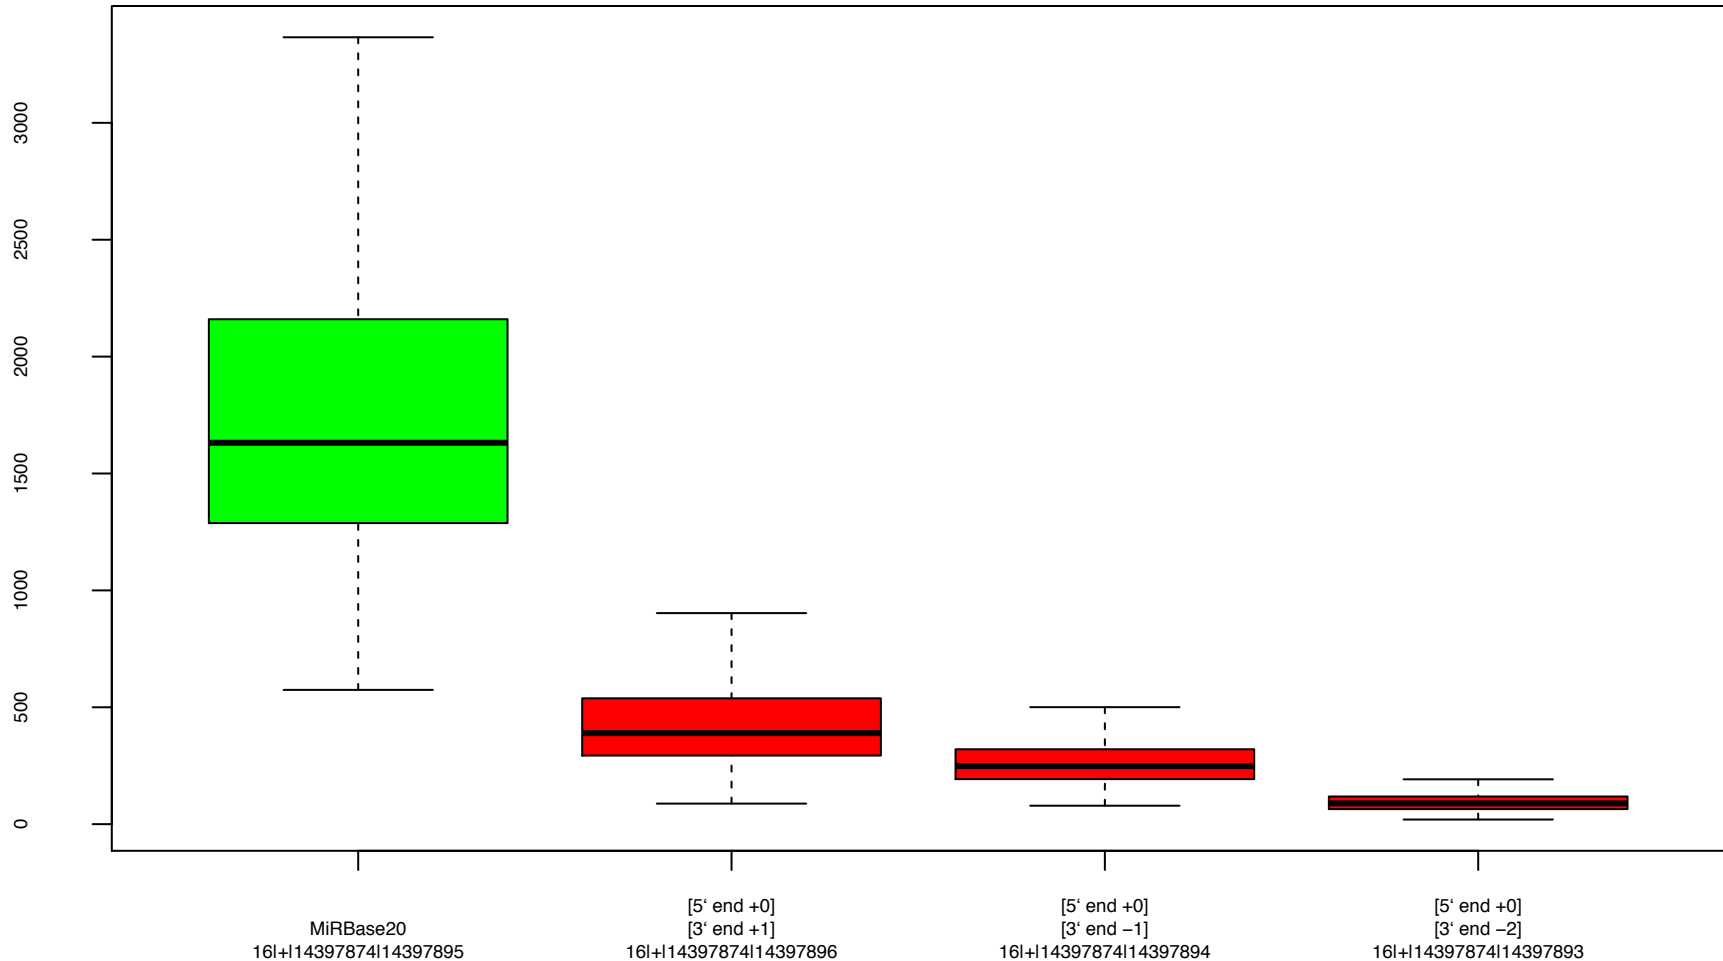

isomiRs

# MIMAT0000417=hsa-miR-15b-5p=MI0000438

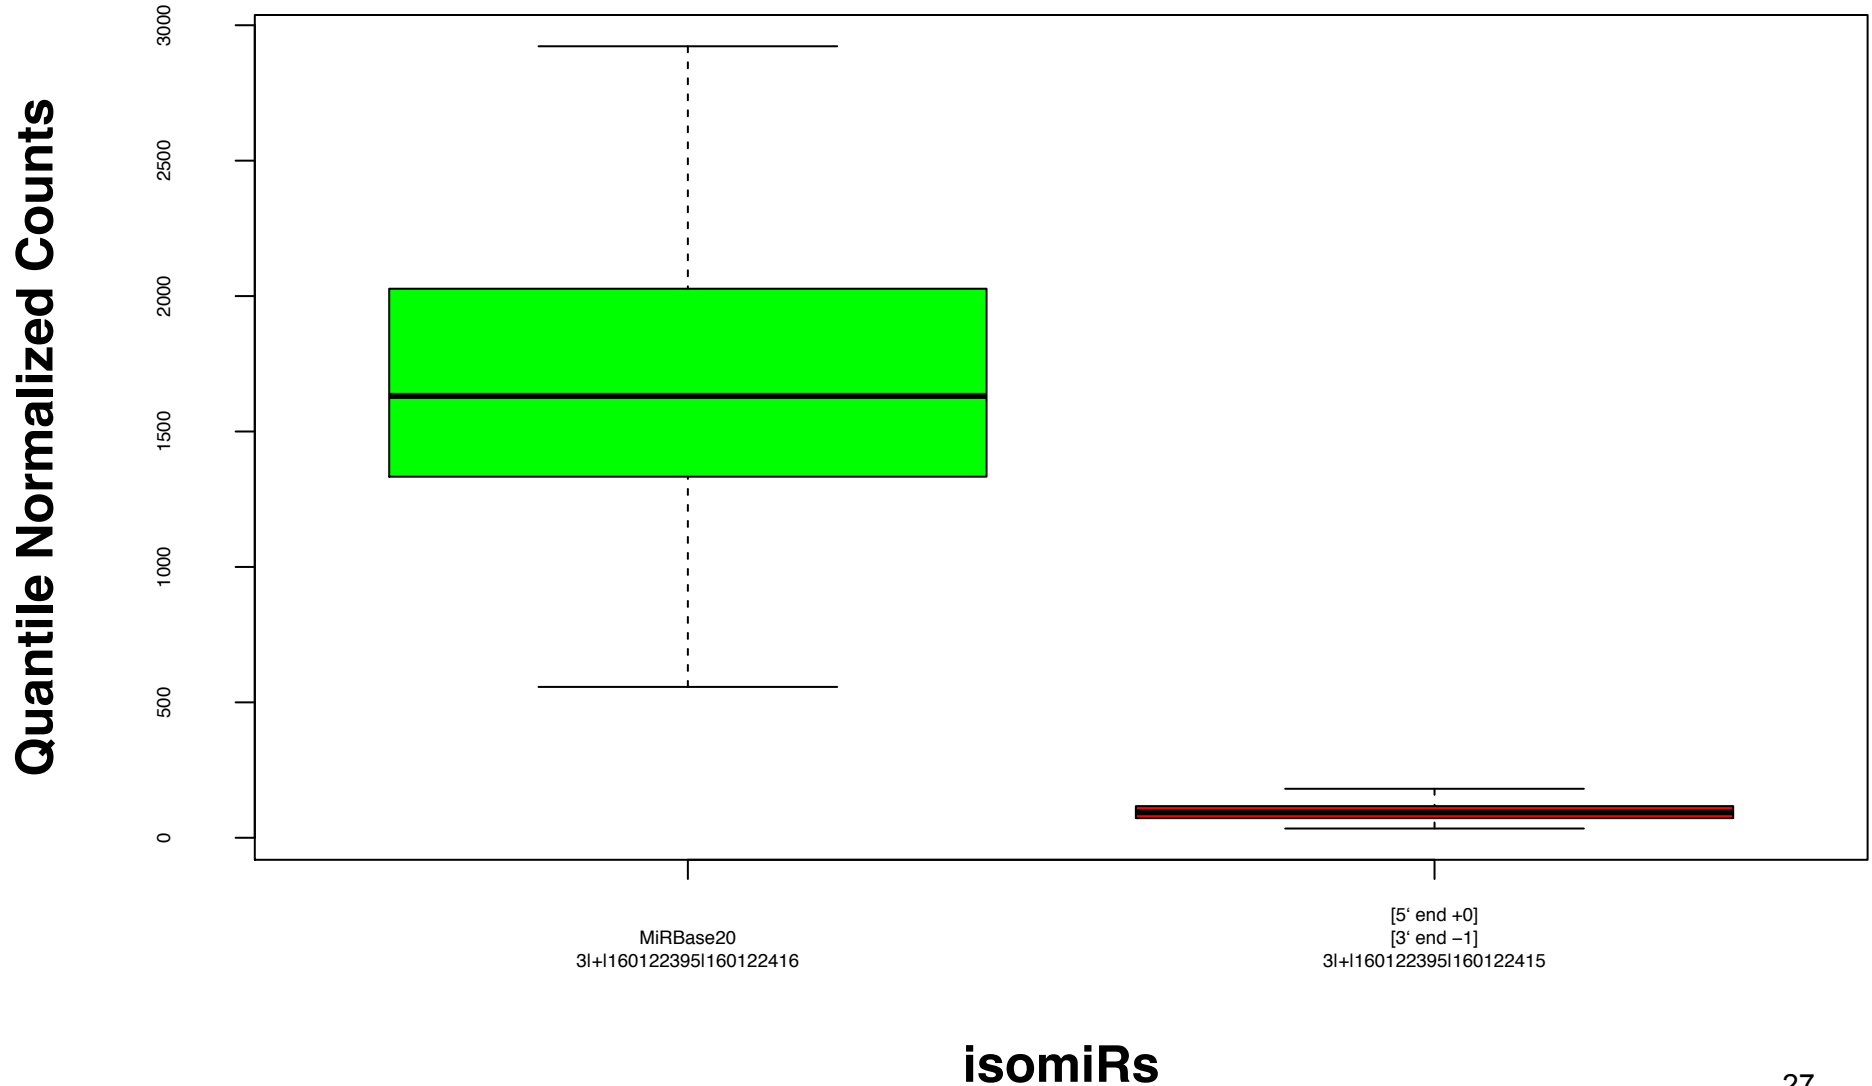

# MIMAT0000420=hsa-miR-30b-5p=MI0000441

Quantile Normalized Counts

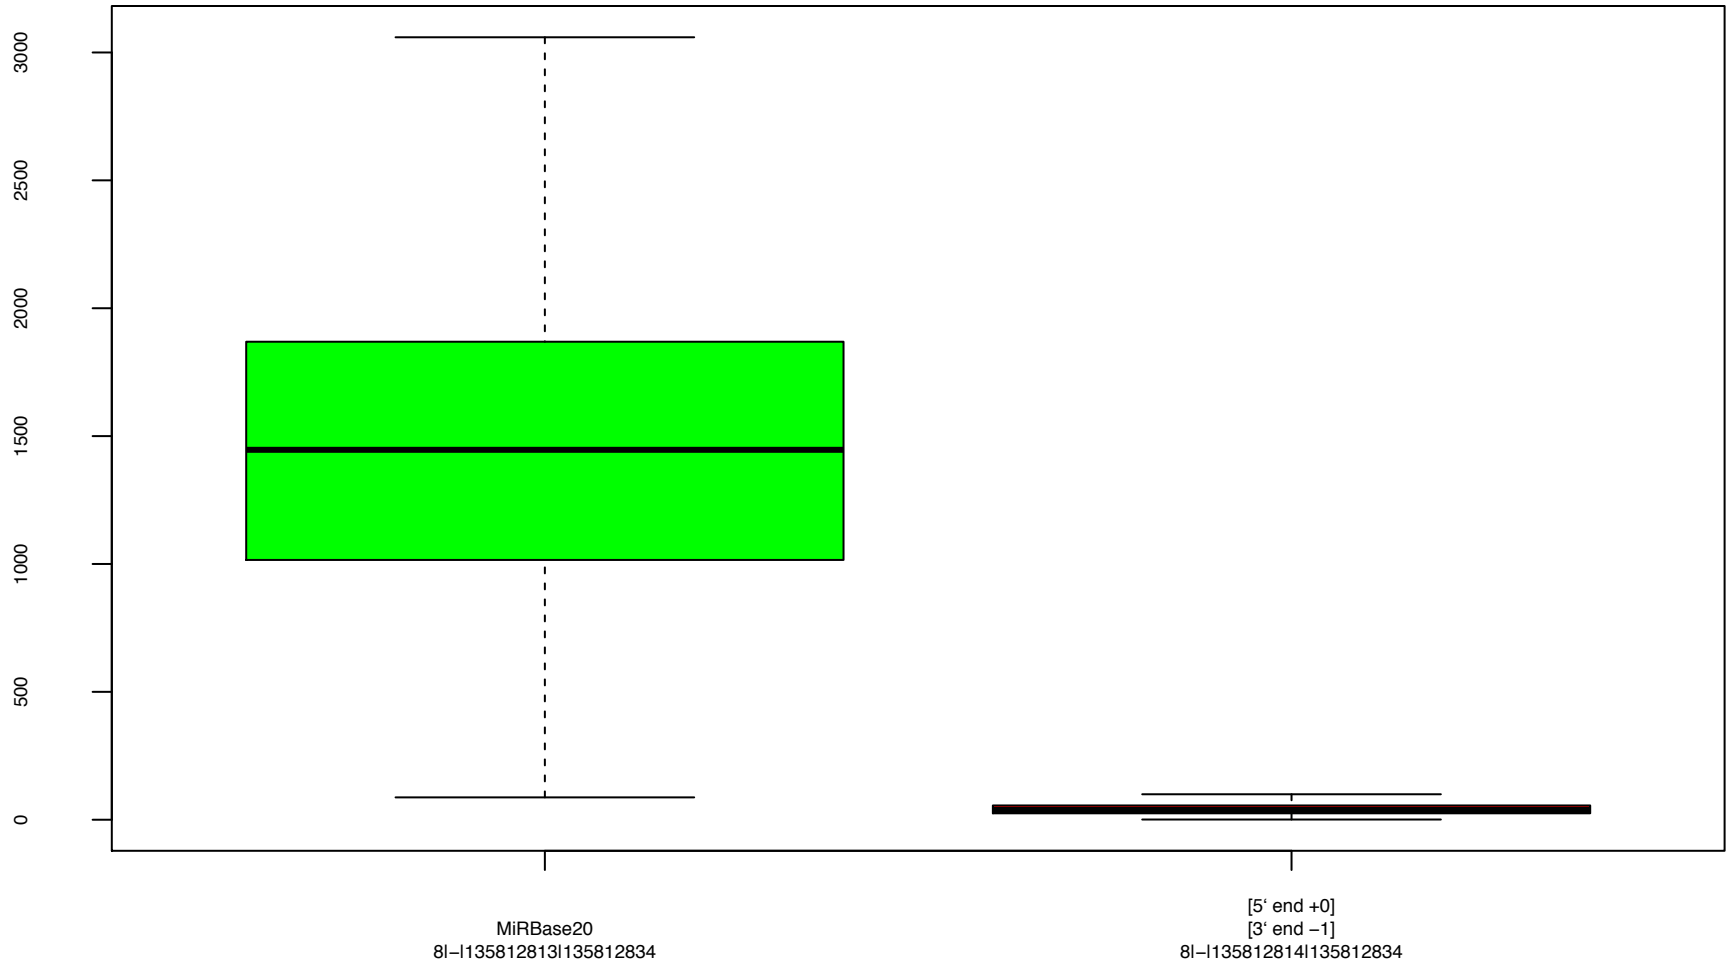

isomiRs

# MIMAT0000075=hsa-miR-20a-5p=MI0000076

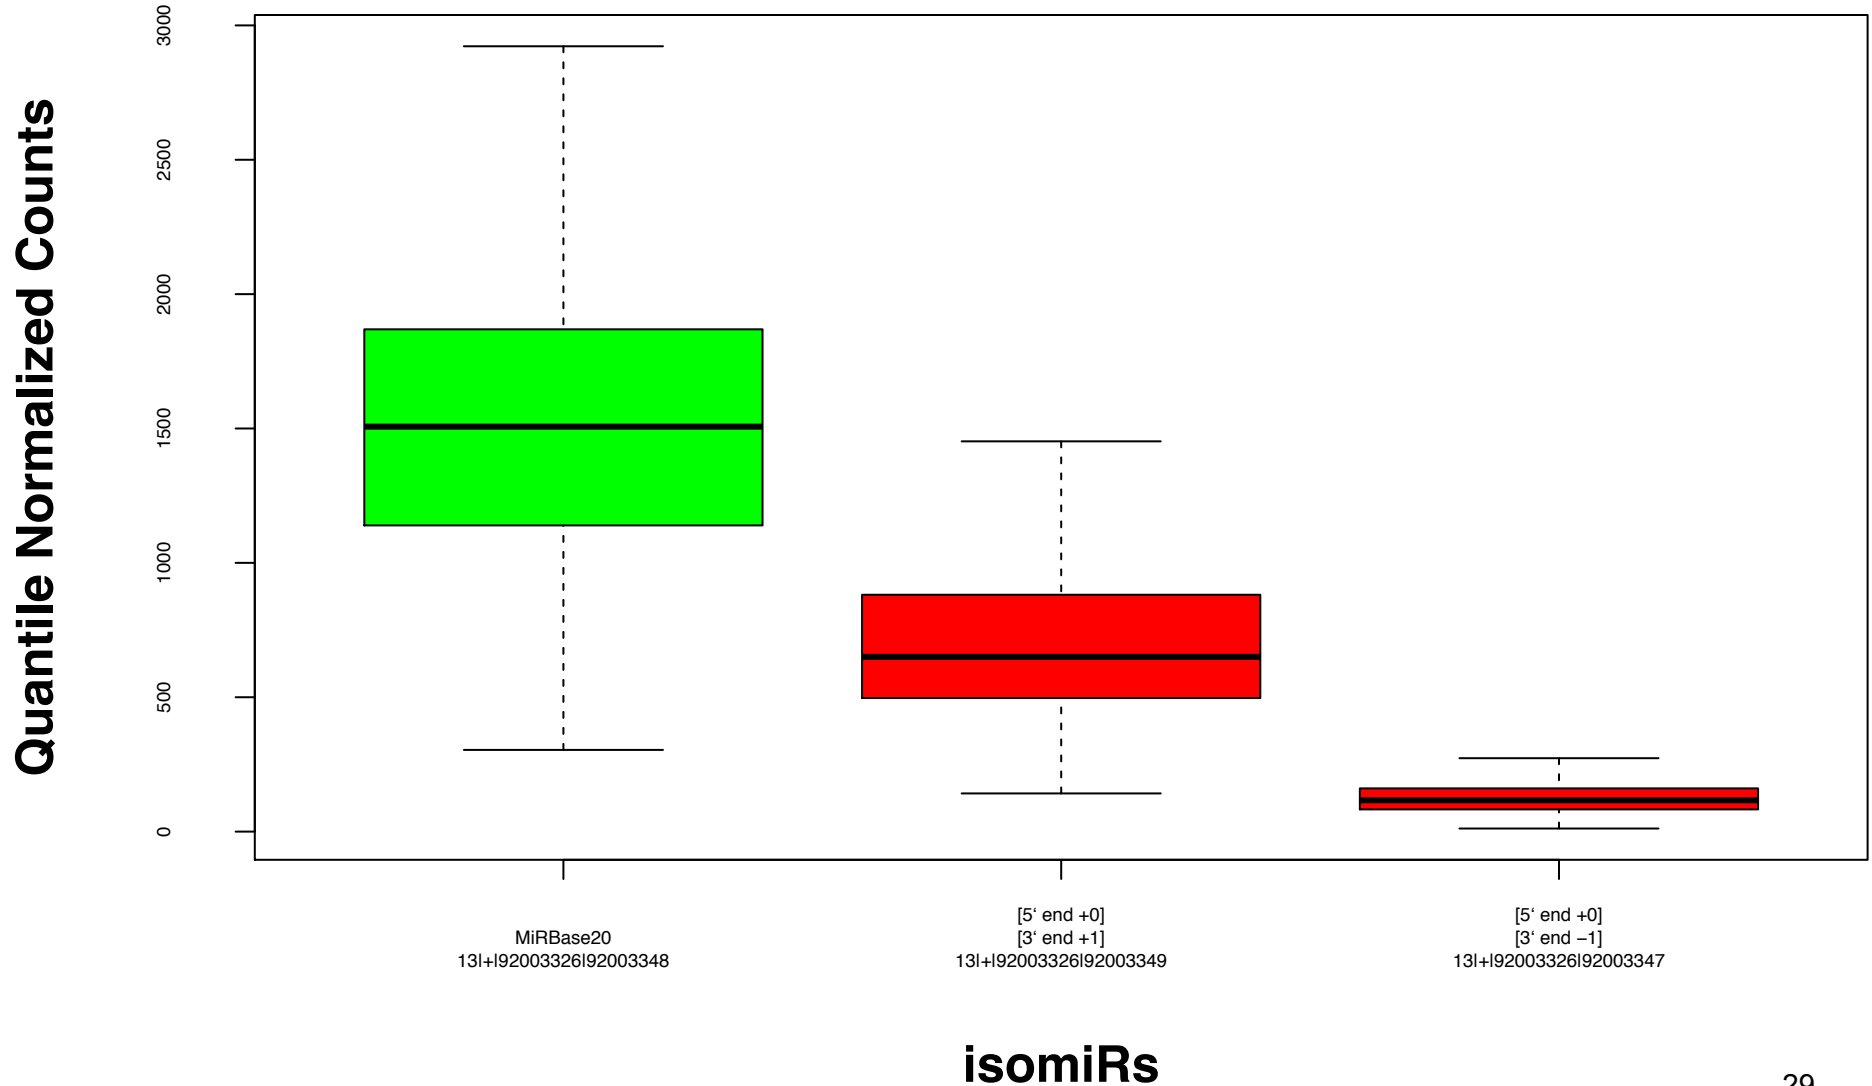

# MIMAT0000093=hsa-miR-93-5p=MI0000095

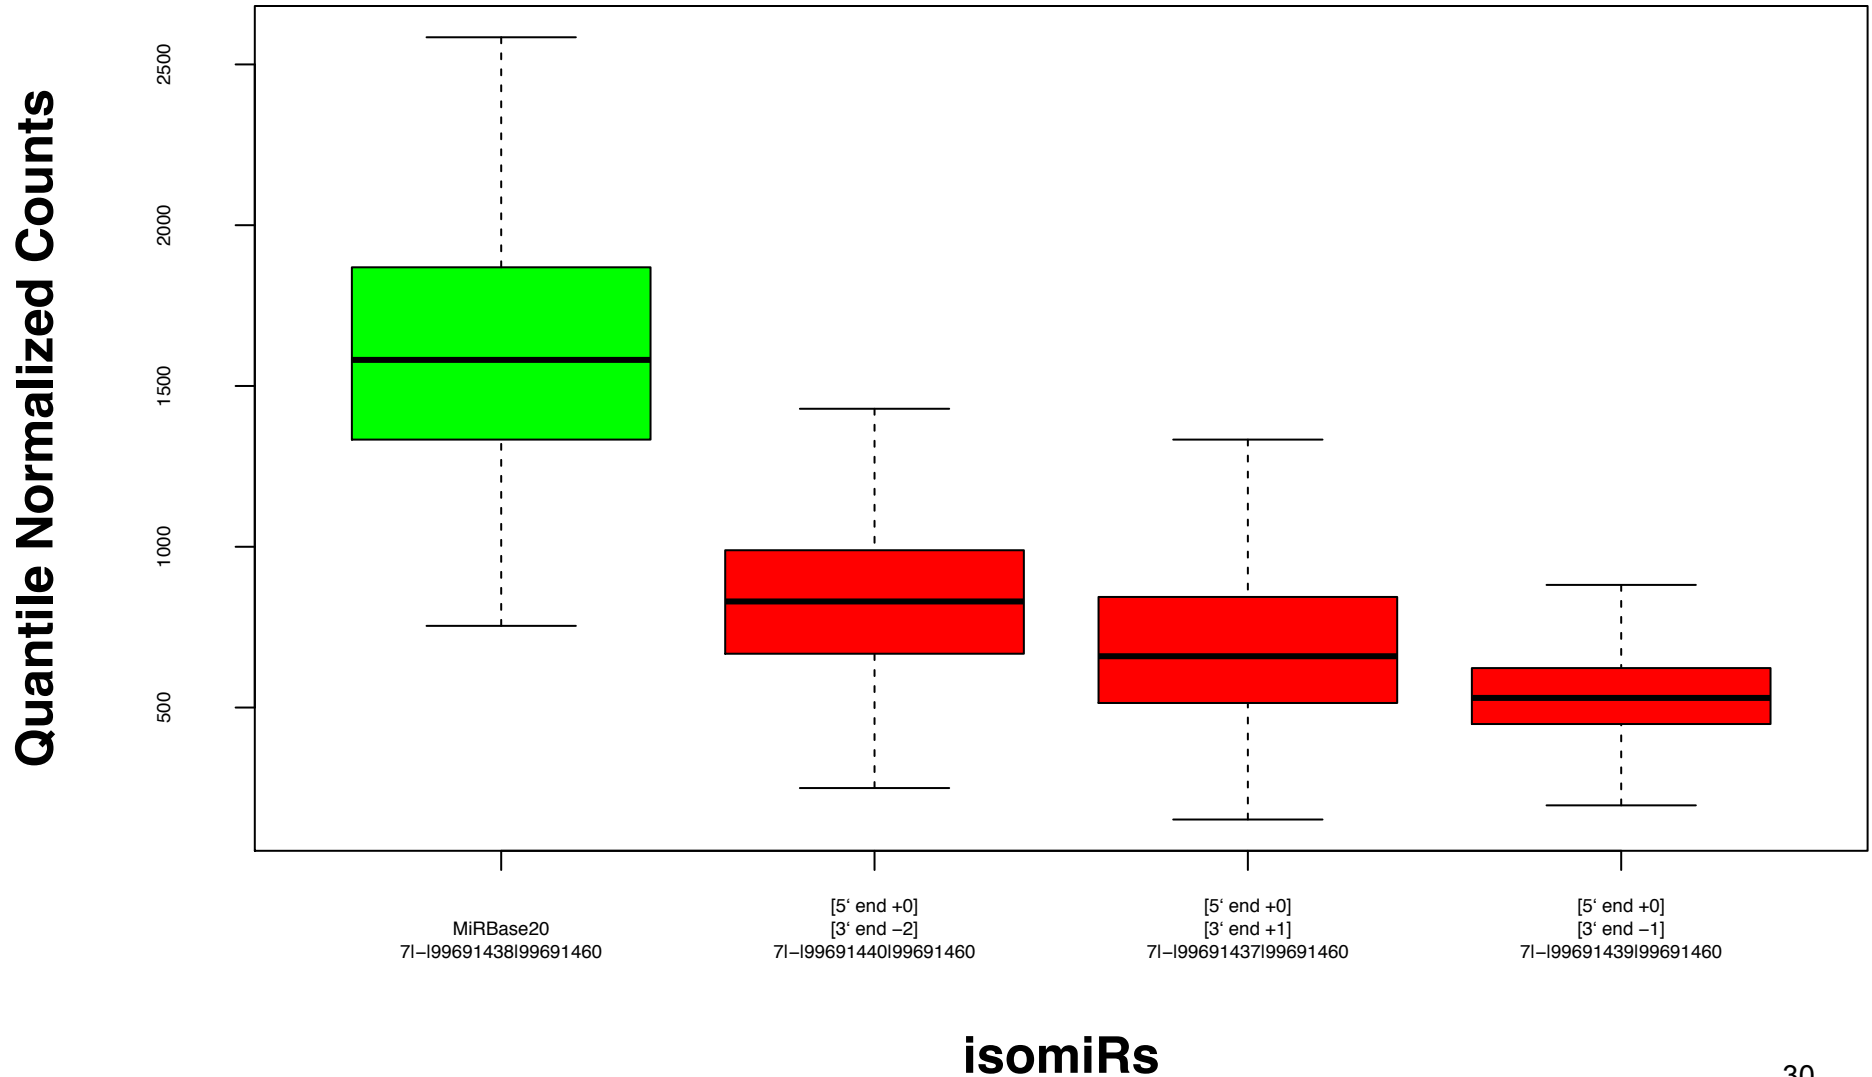

# MIMAT0000267=hsa-miR-210-3p=MI0000286

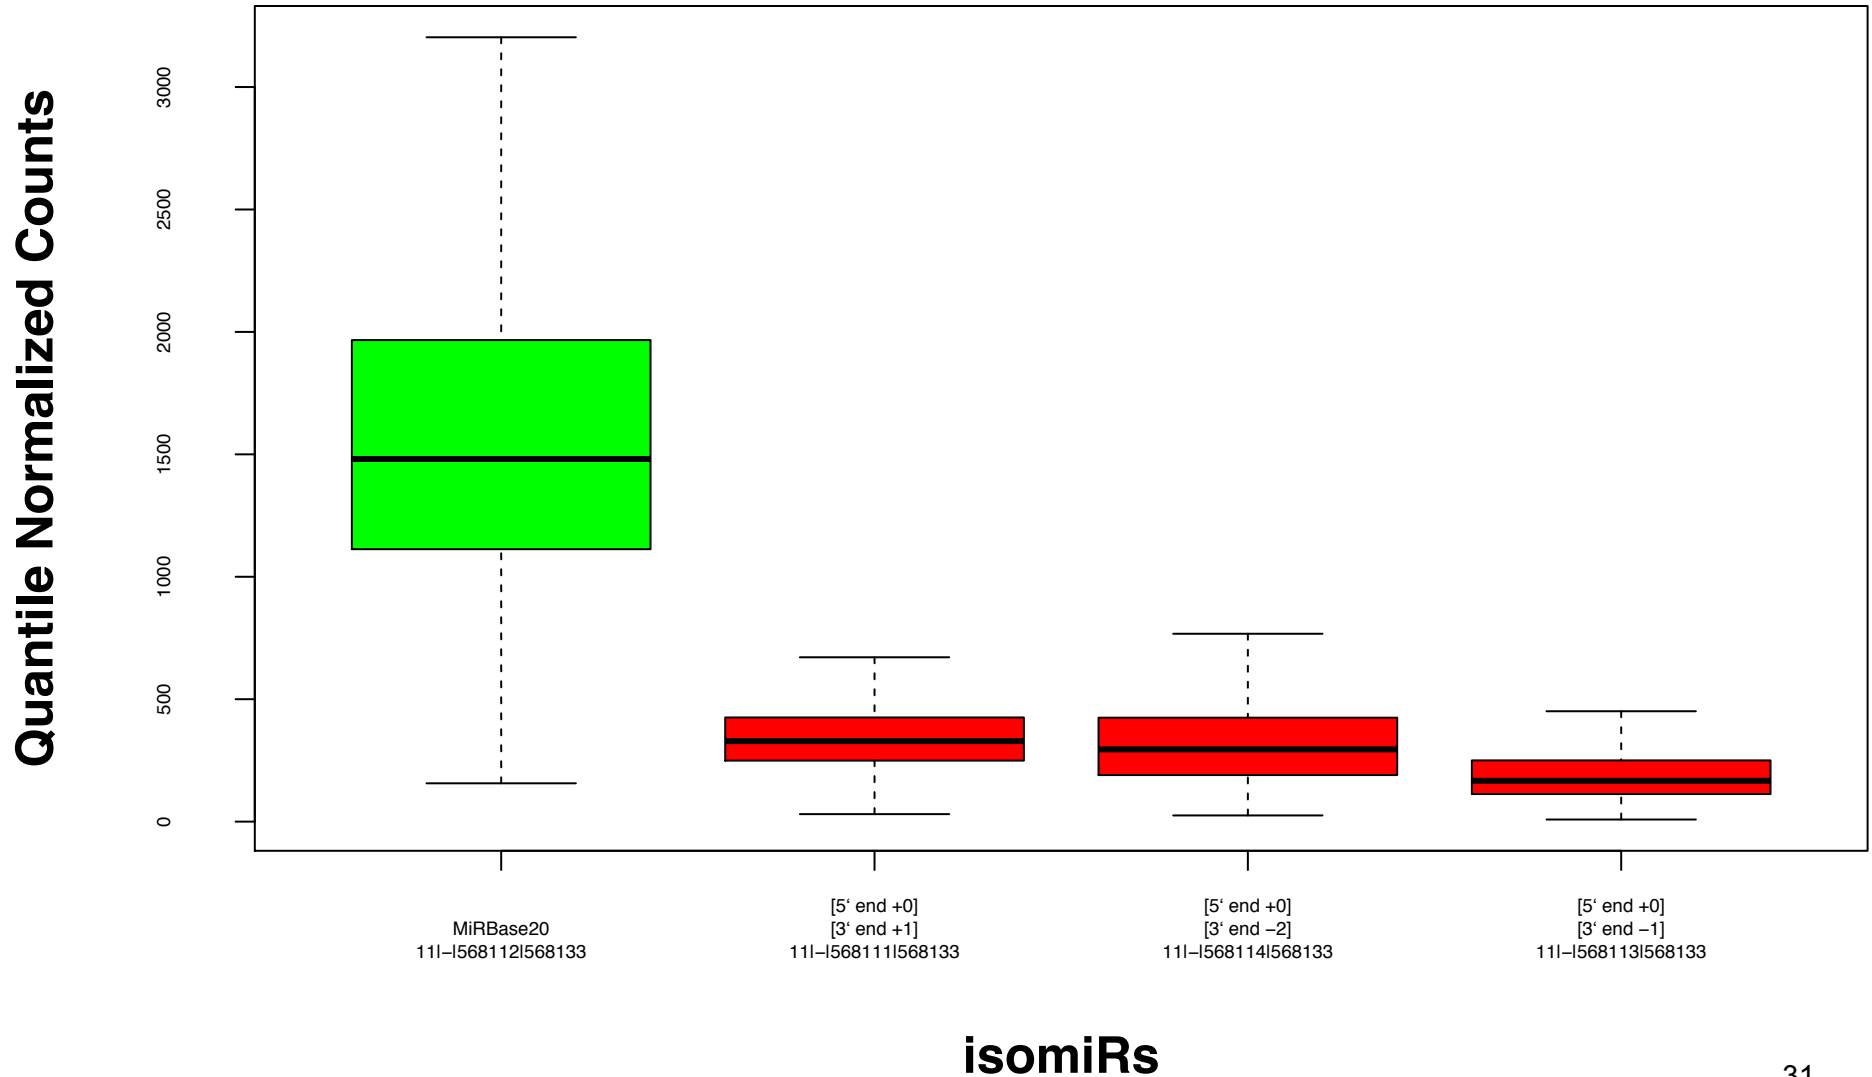



# MIMAT0000086=hsa-miR-29a-3p=MI0000087

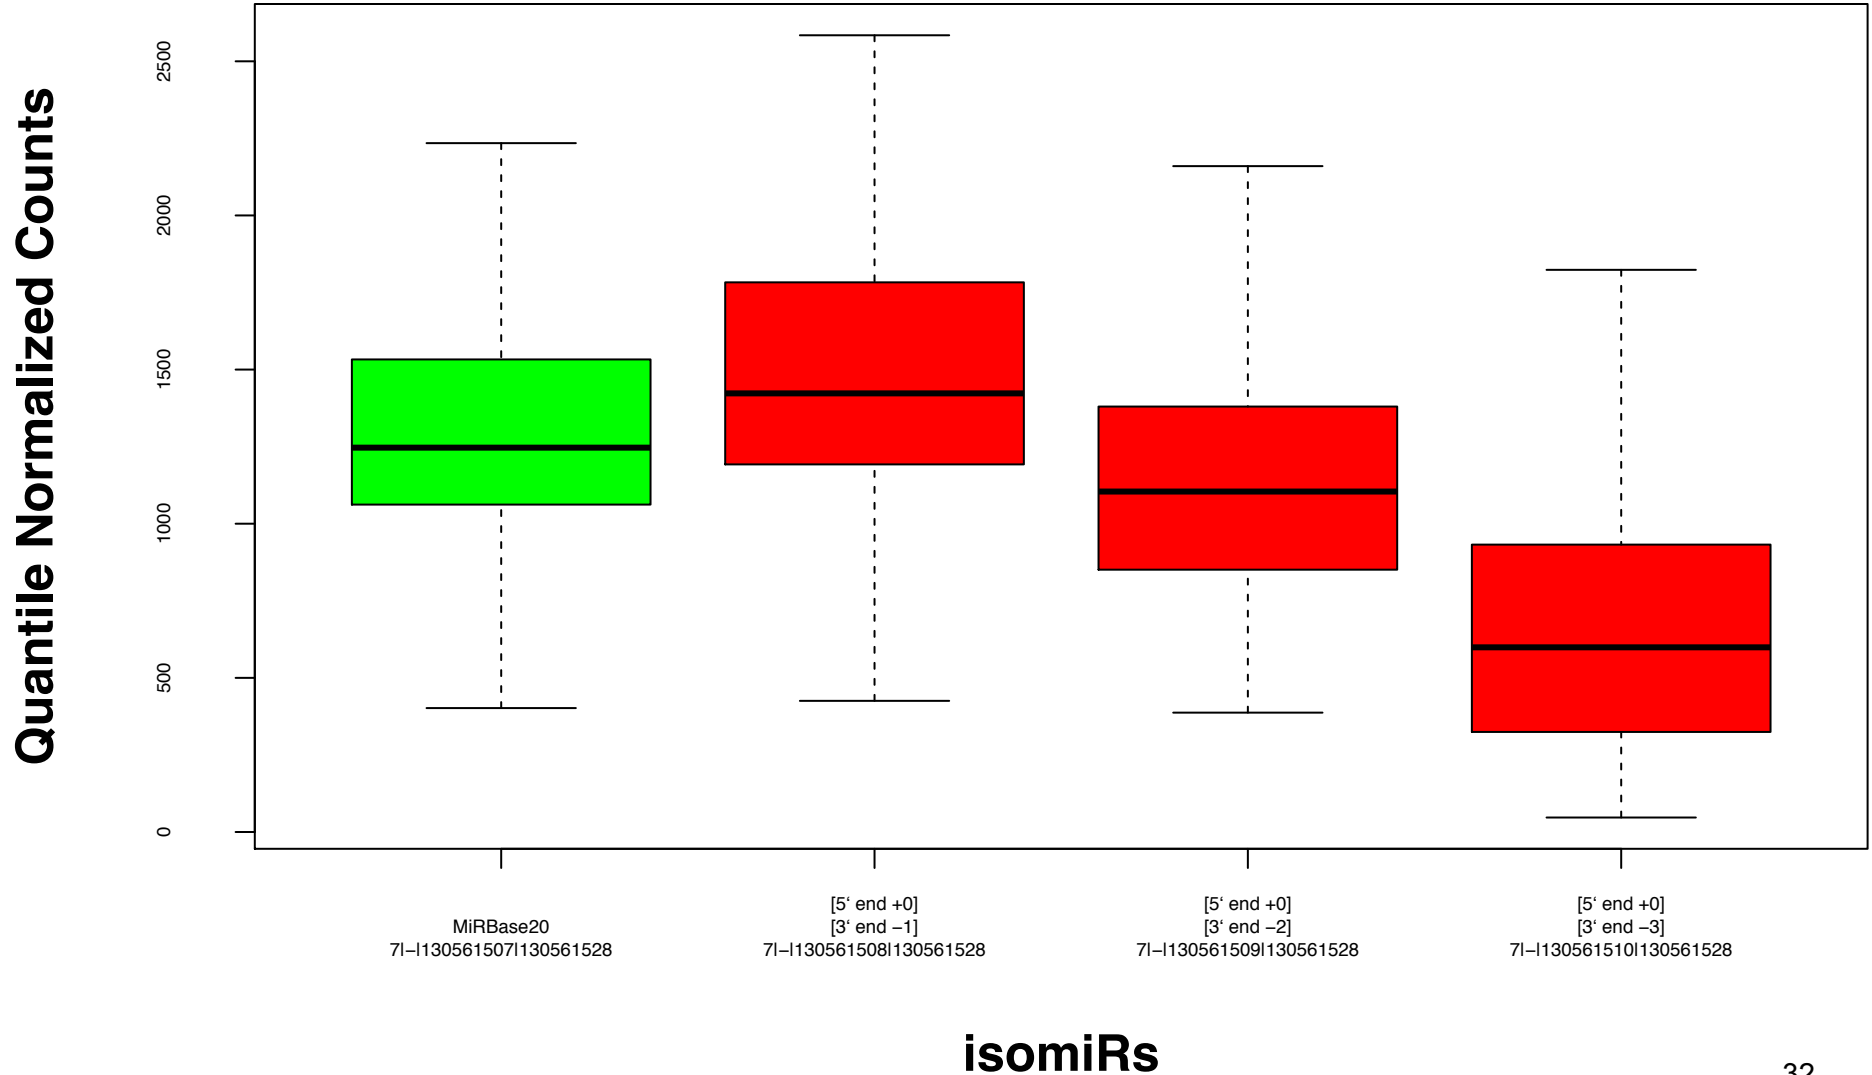

# MIMAT0000084=hsa-miR-27a-3p=MI0000085

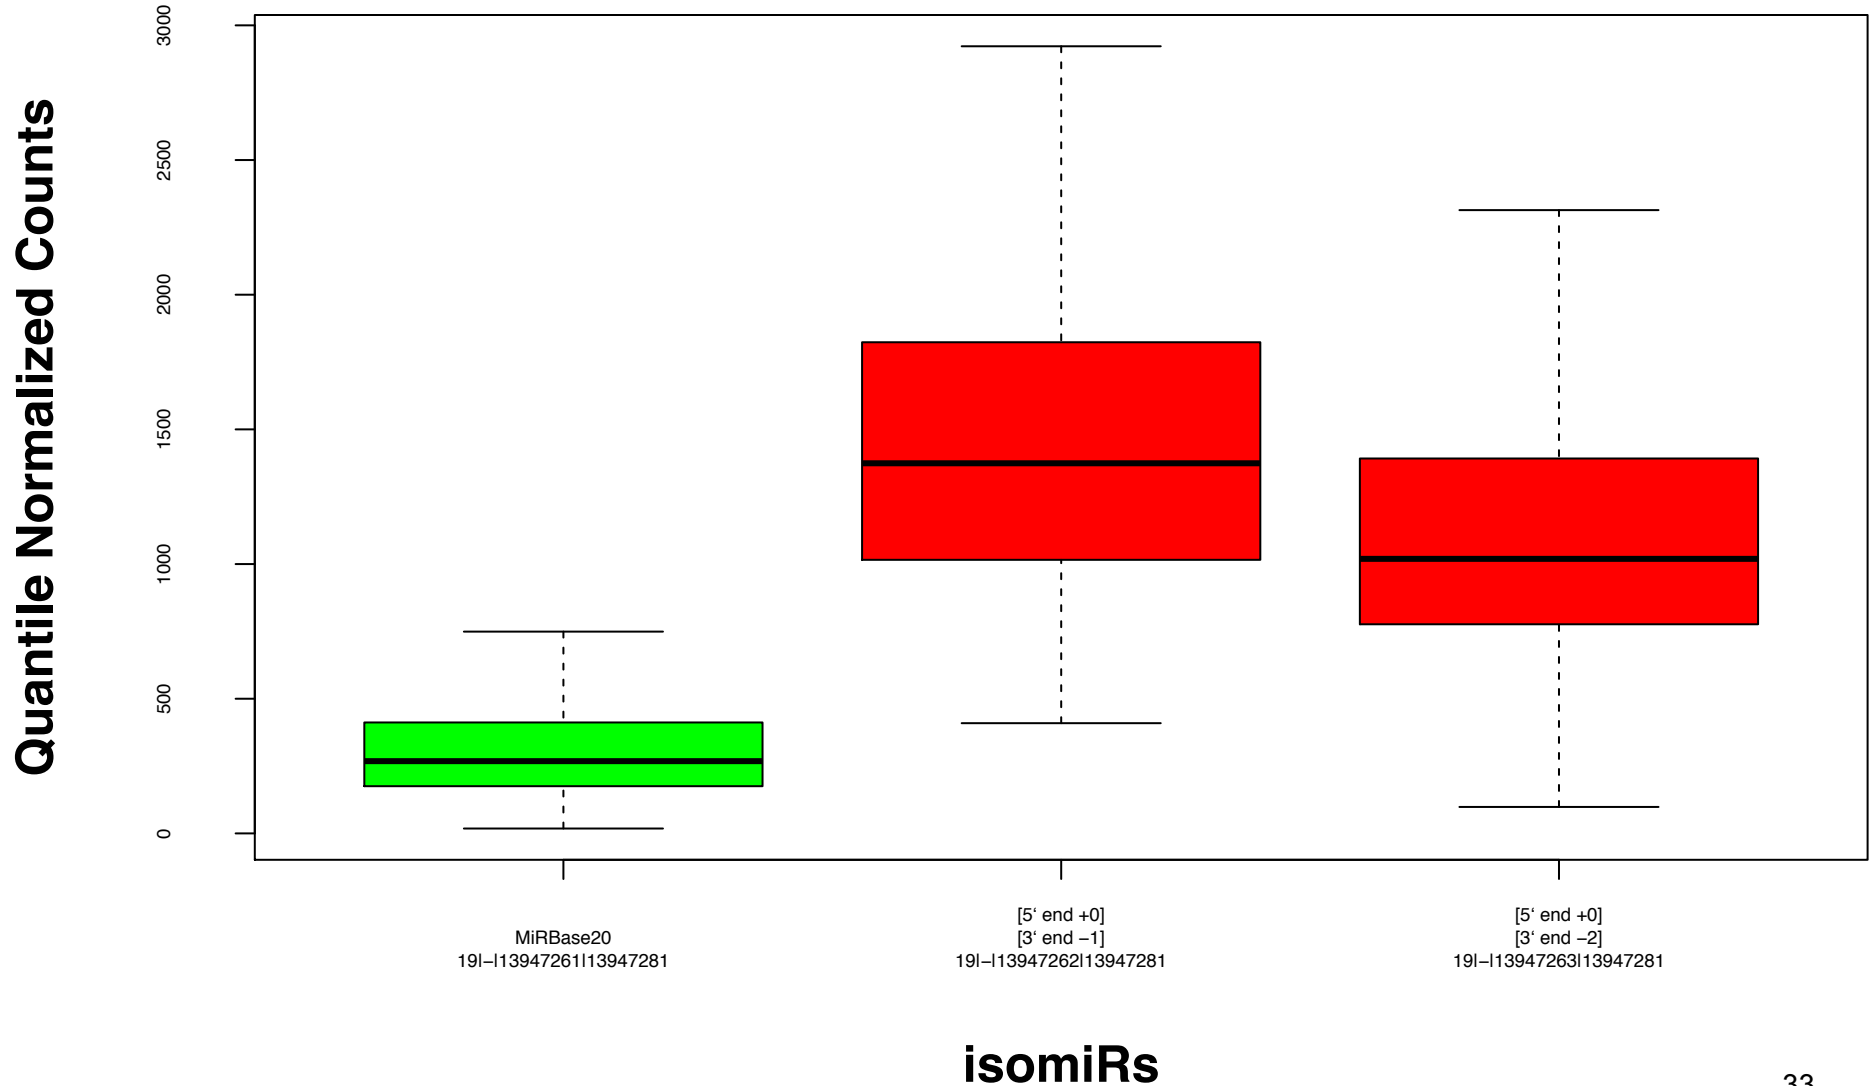

# MIMAT0000070=hsa-miR-17-5p=MI0000071

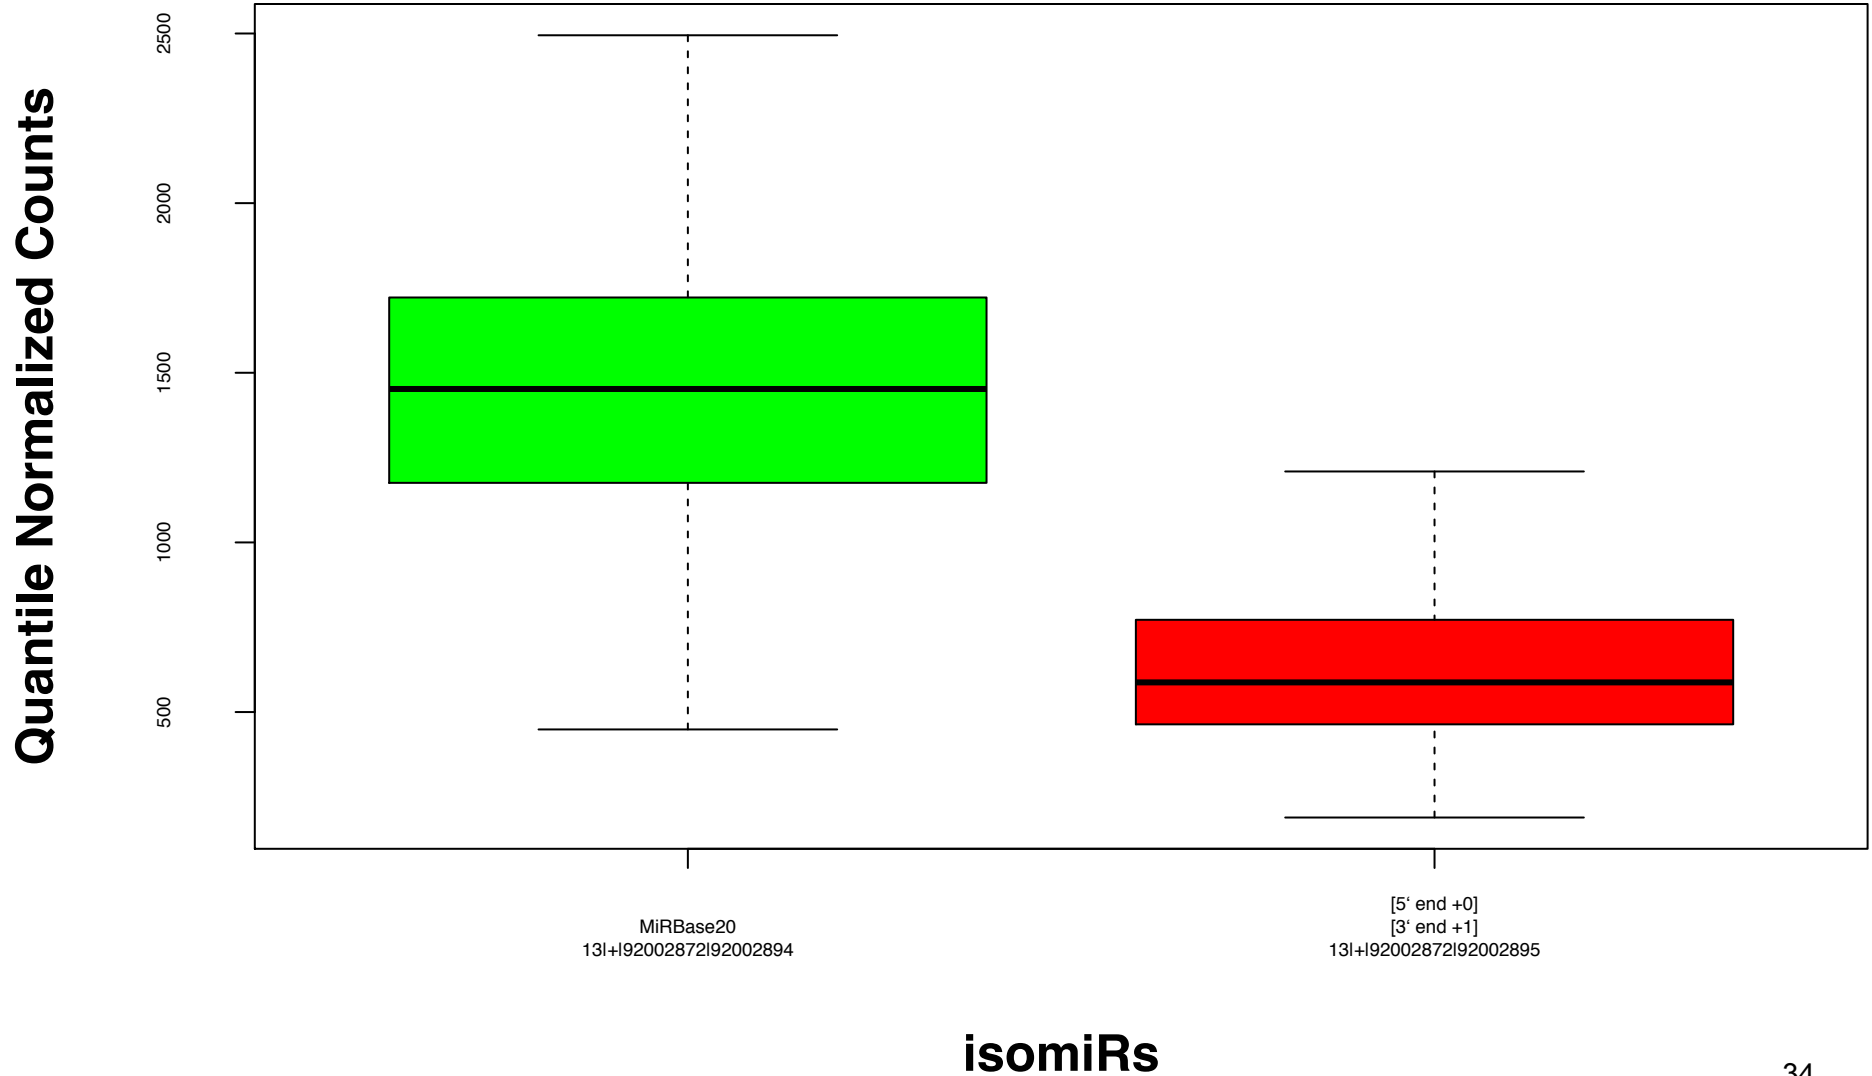

# MIMAT0000270=hsa-miR-181a-3p=MI0000289

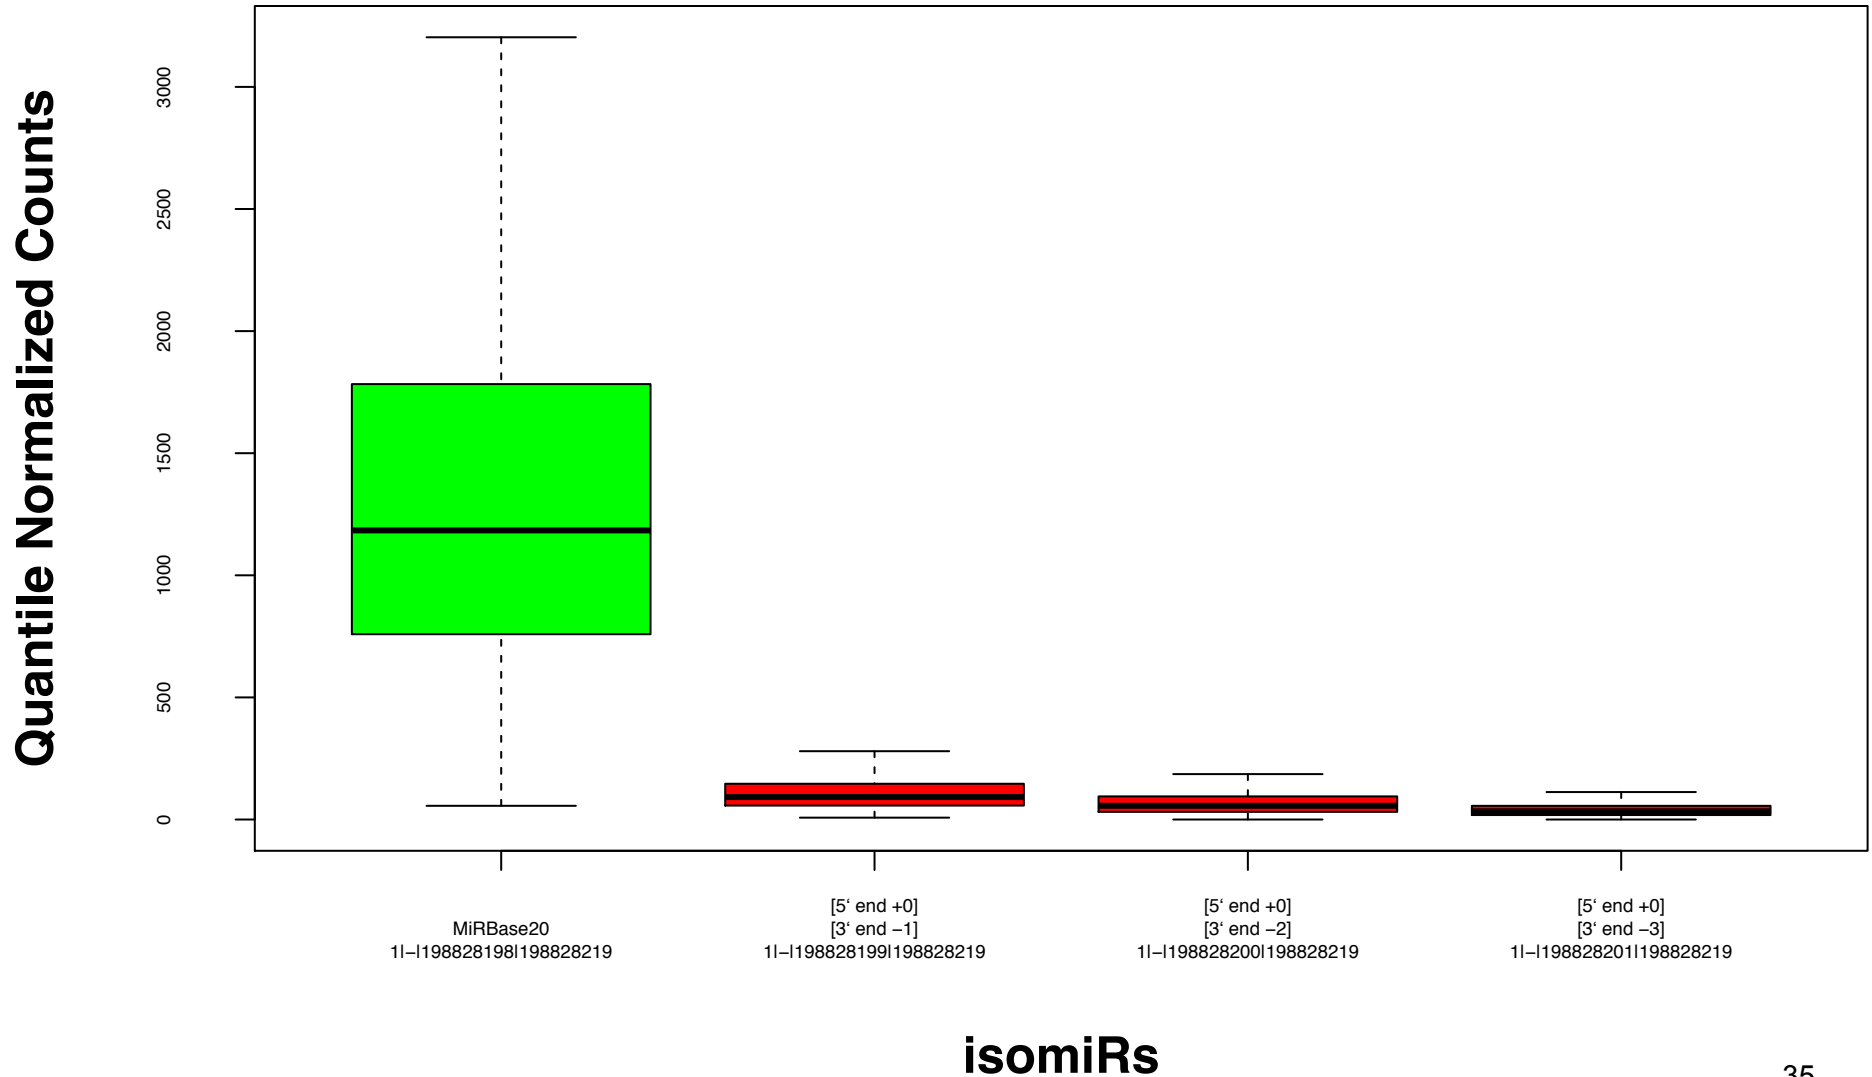

# MIMAT0003886=hsa-miR-769-5p=MI0003834

Quantile Normalized Counts

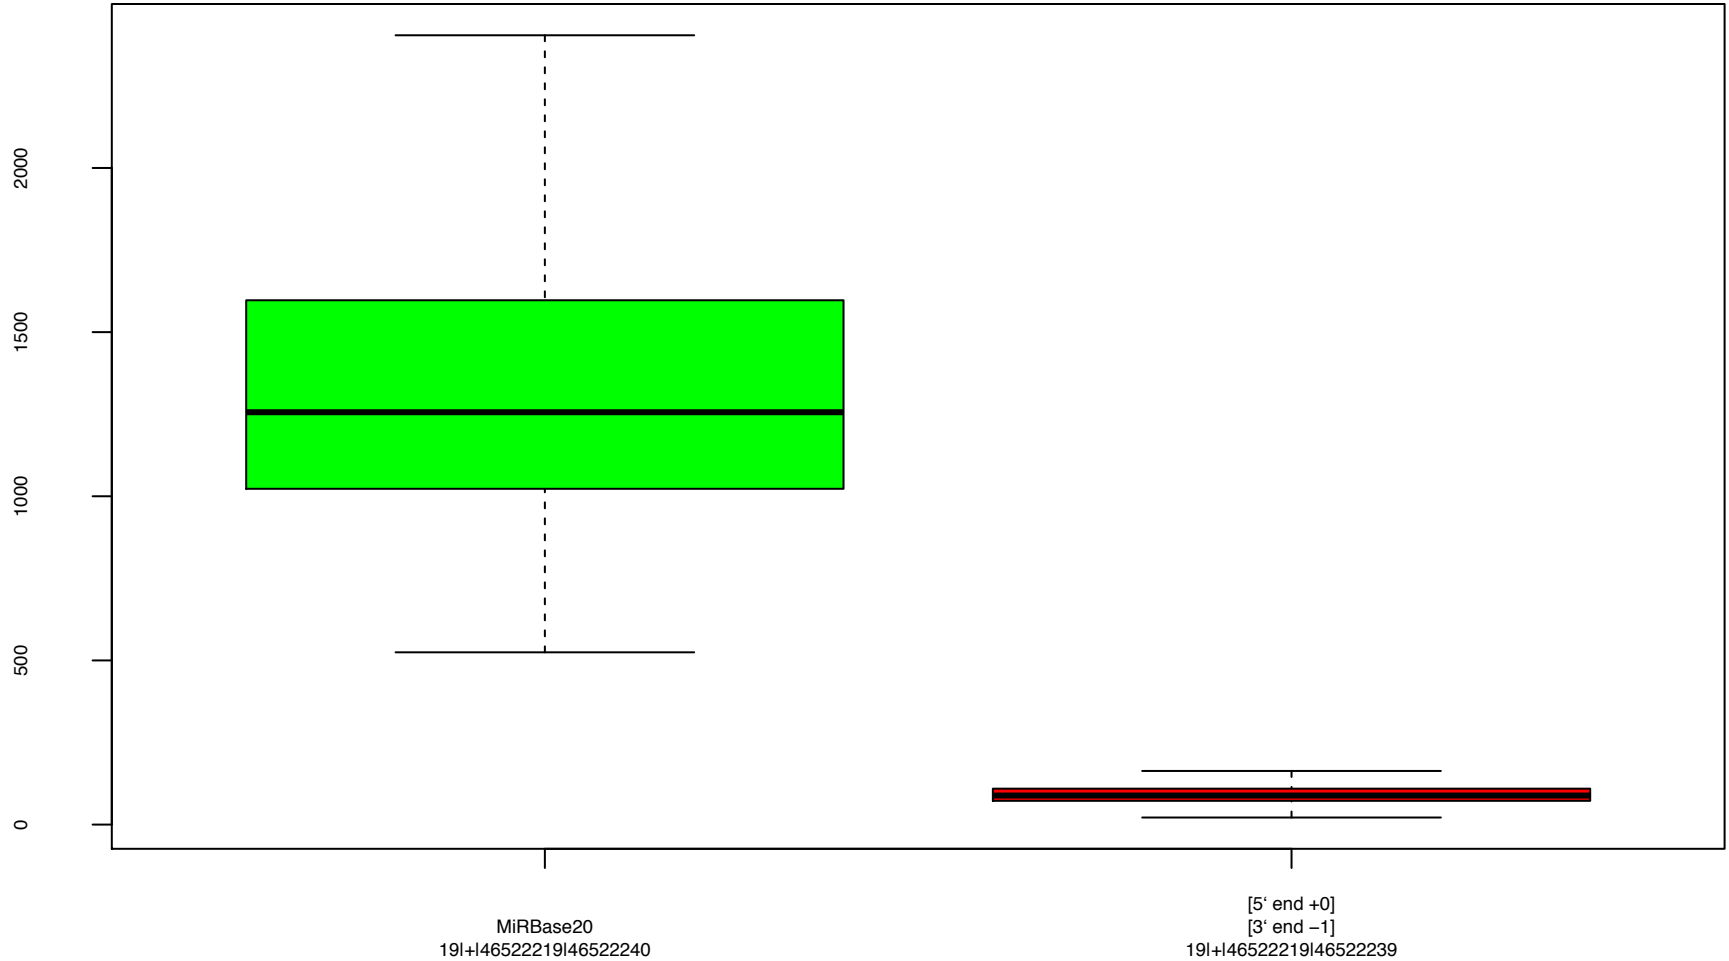

isomiRs

# MIMAT0000693=hsa-miR-30e-3p=MI0000749

Quantile Normalized Counts

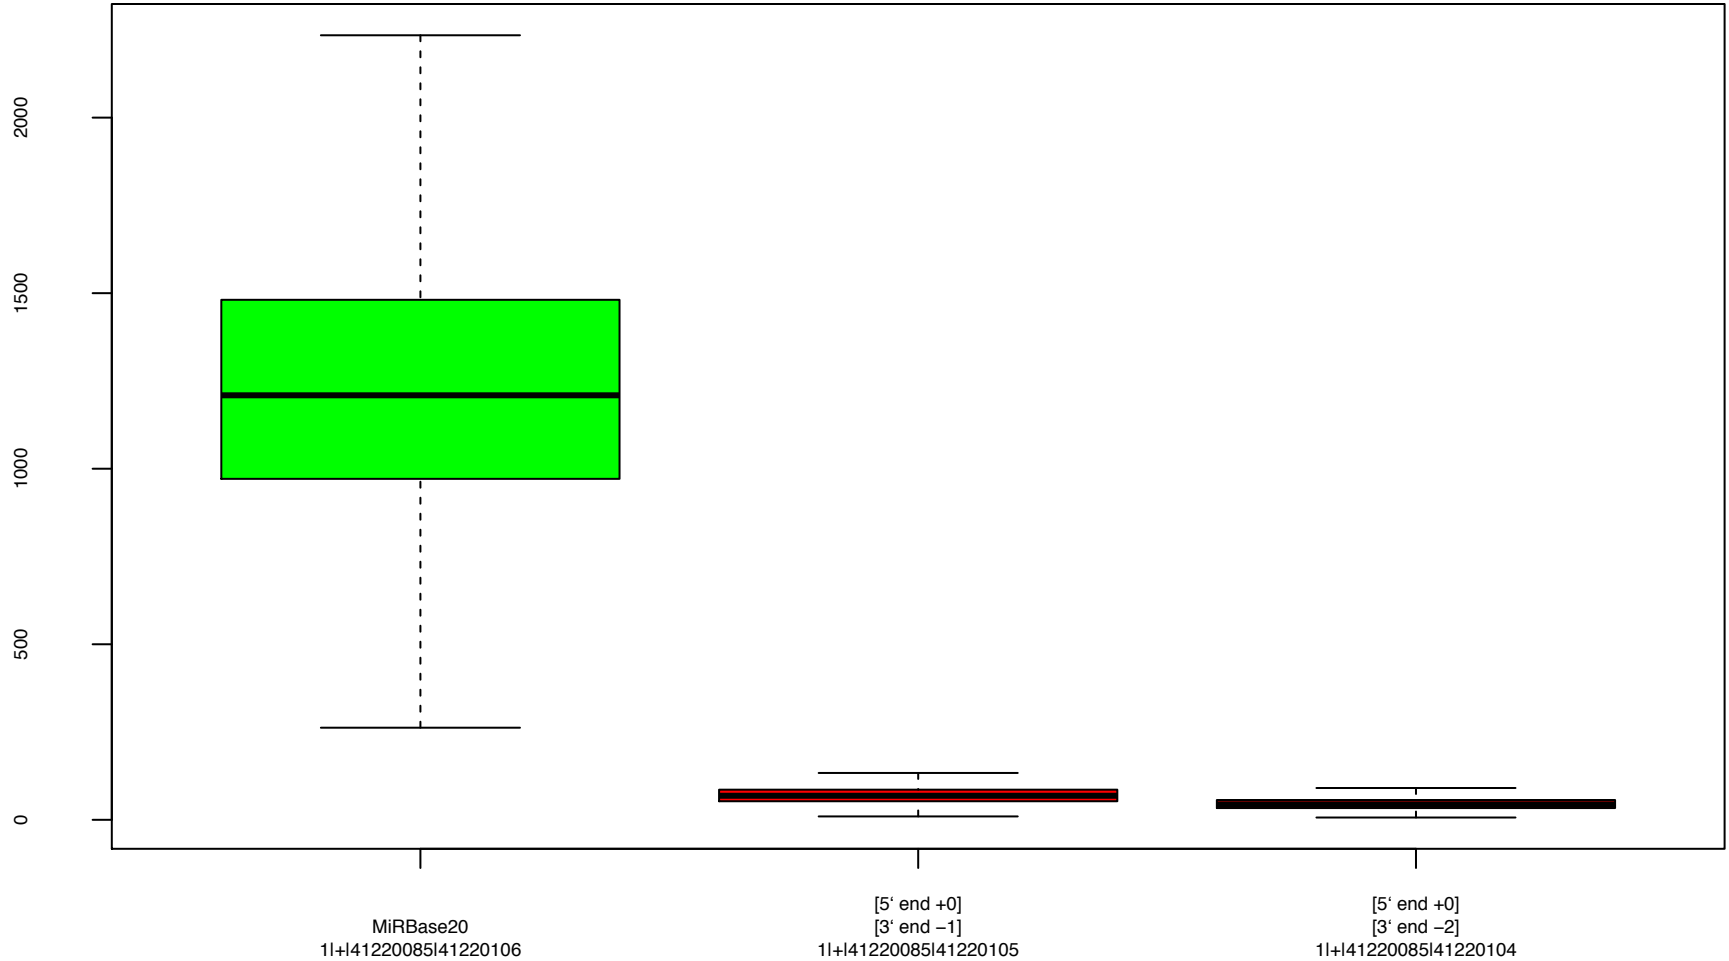

isomiRs

# MIMAT0000753=hsa-miR-342-3p=MI0000805

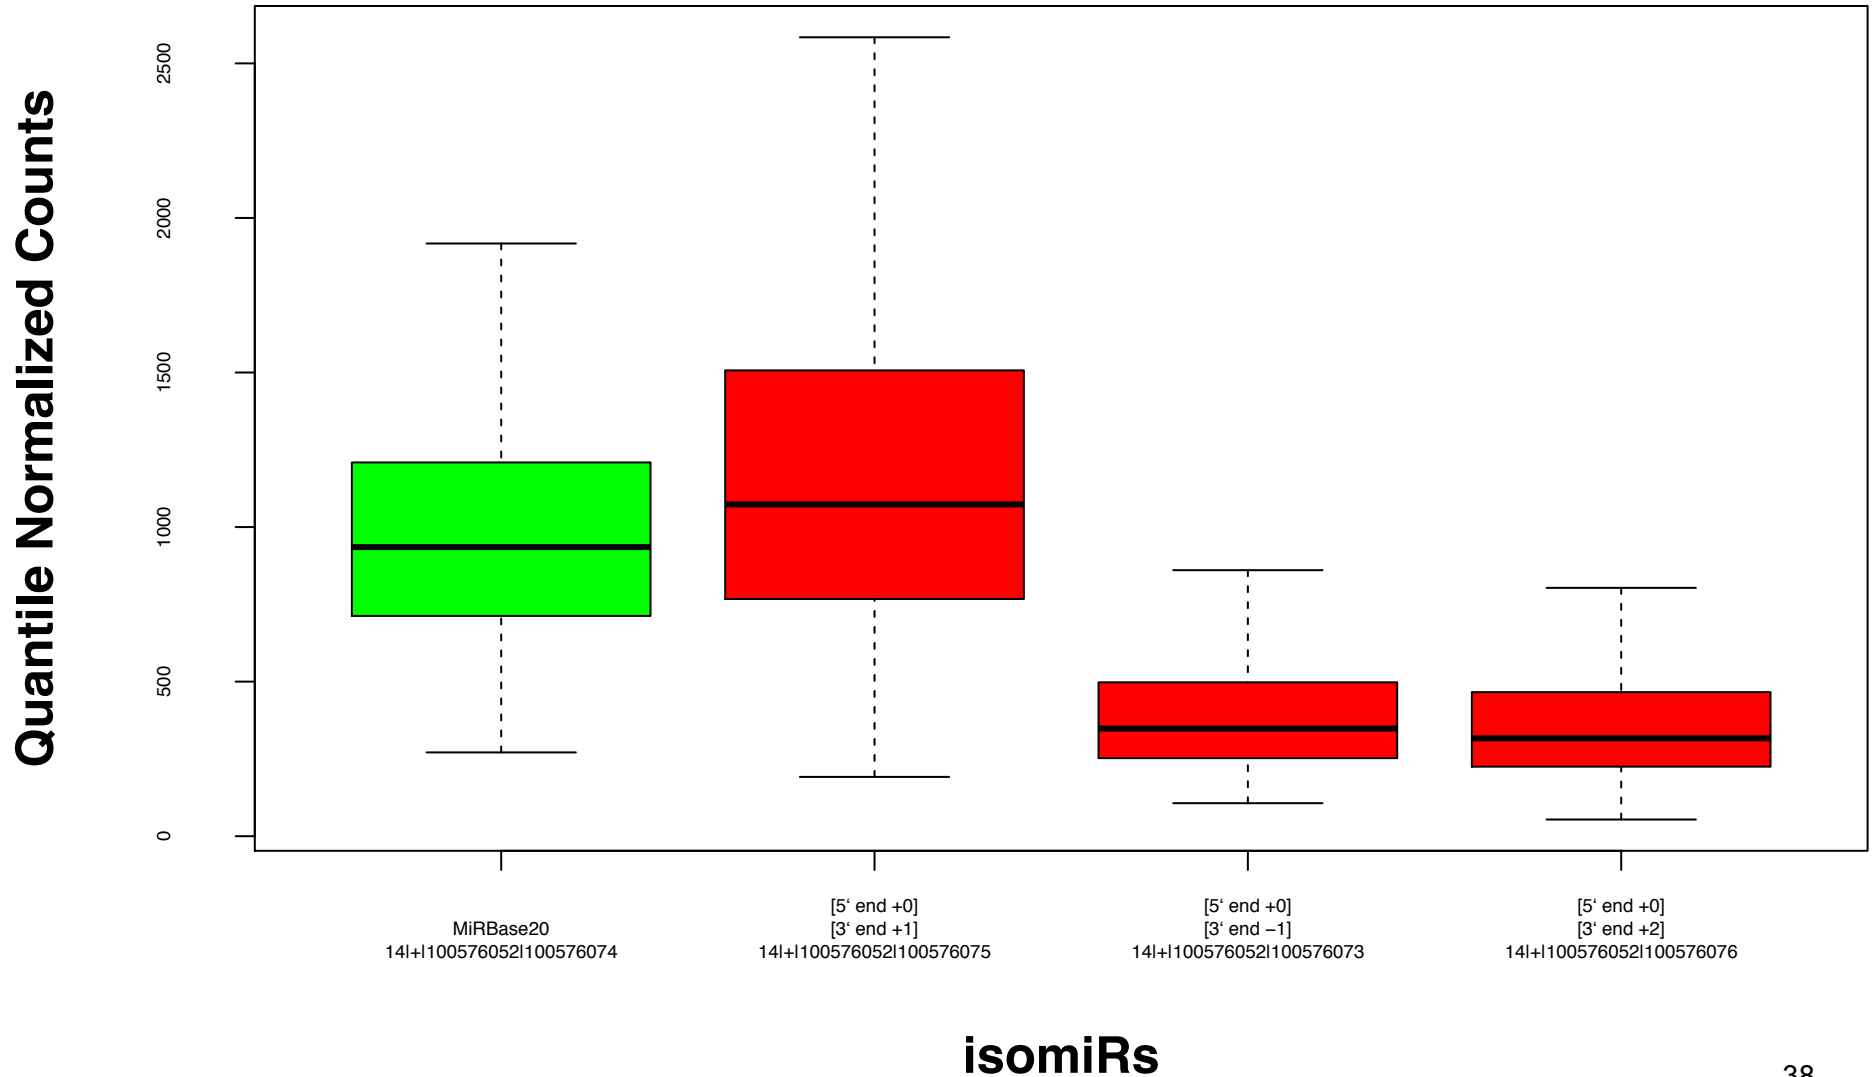

# MIMAT0000691=hsa-miR-130b-3p=MI0000748

Quantile Normalized Counts

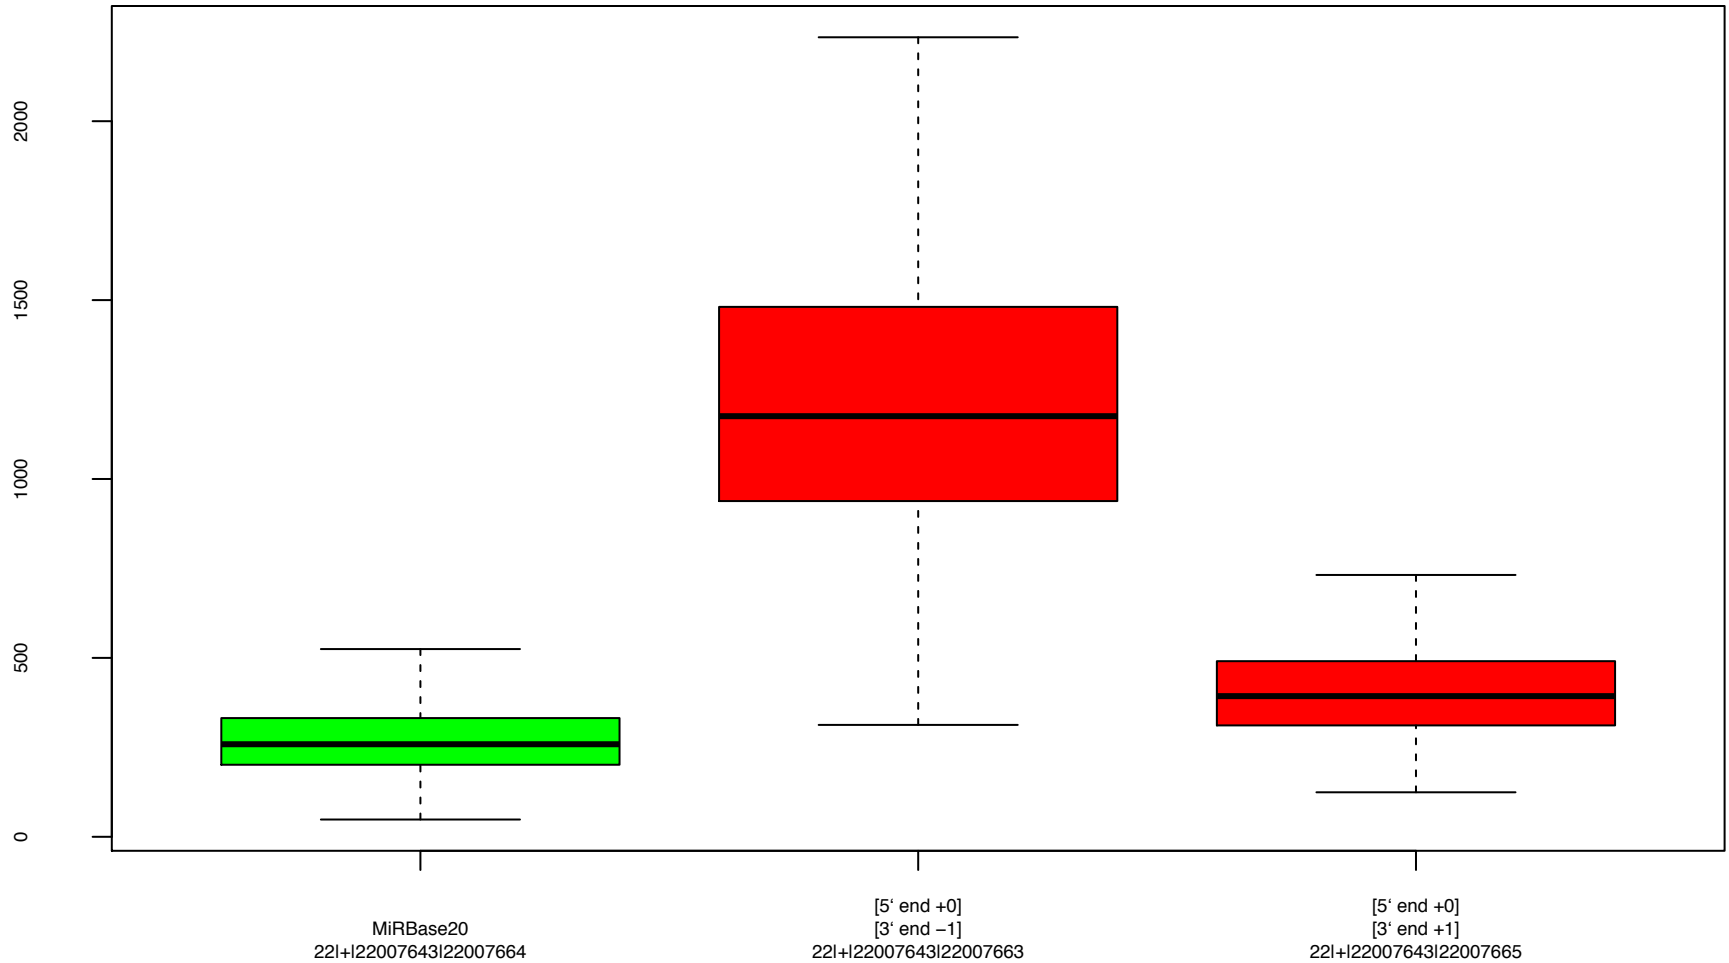

isomiRs



# MIMAT0000067\_1=hsa-let-7f-5p=MI0000068

Quantile Normalized Counts

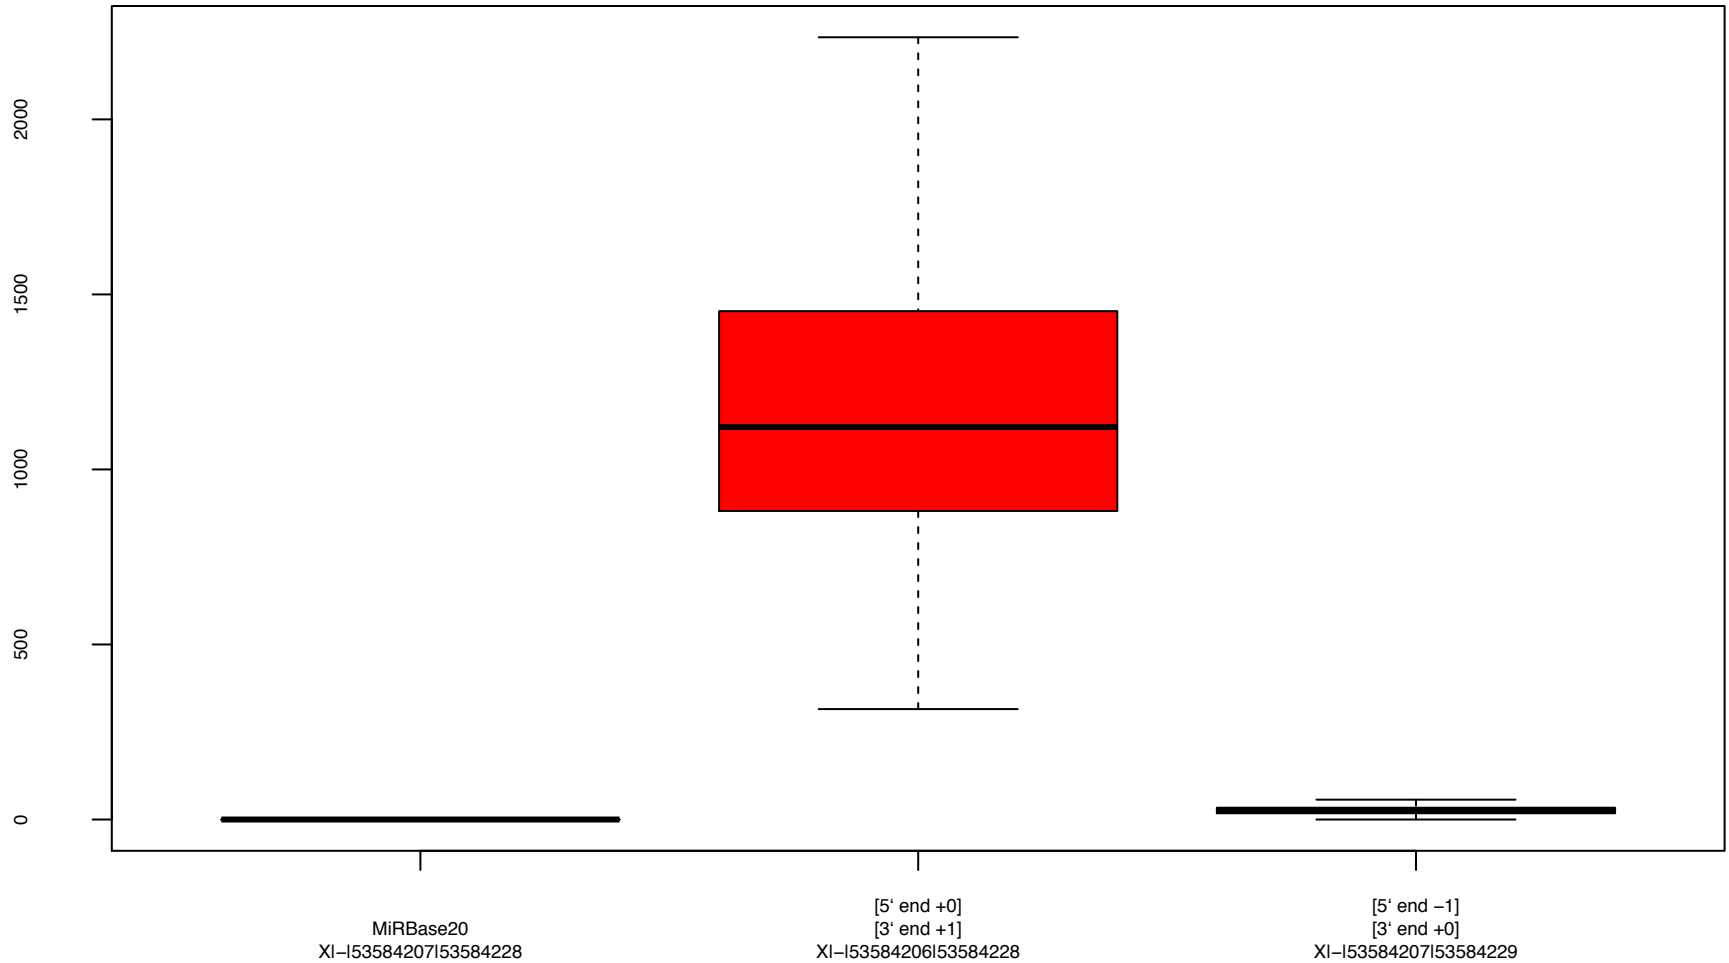

isomiRs

# MIMAT0000707=hsa-miR-363-3p=MI0000764

Quantile Normalized Counts

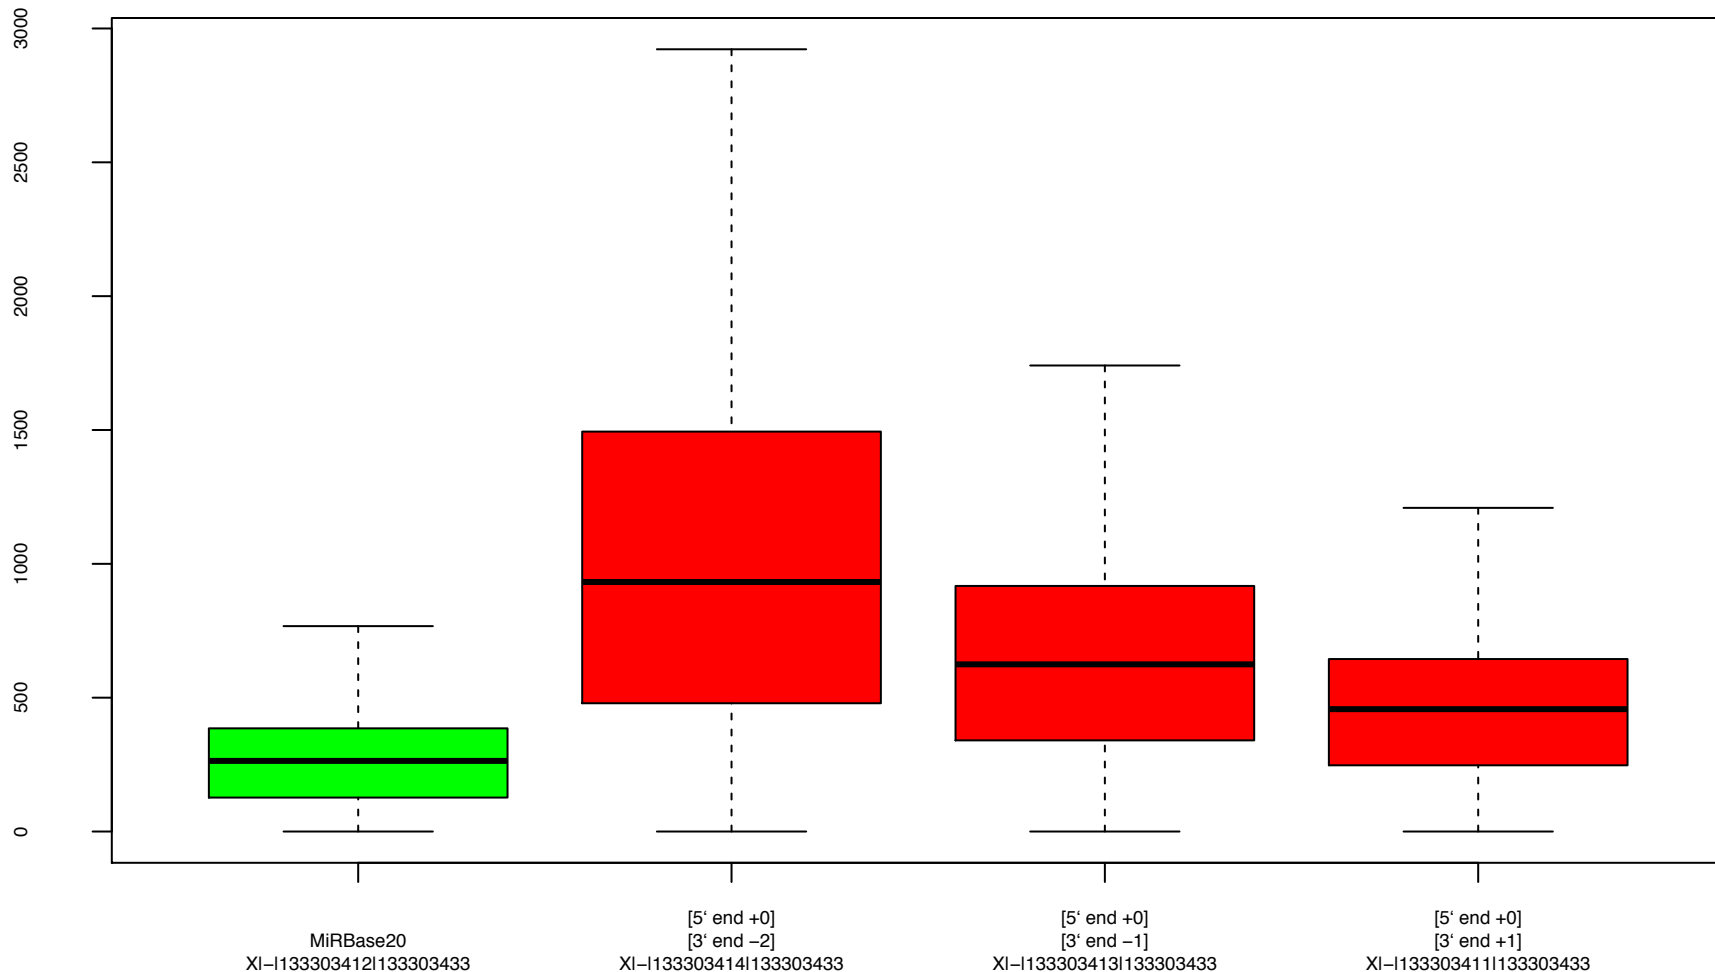

isomiRs

# MIMAT0003393=hsa-miR-425-5p=MI0001448

Quantile Normalized Counts

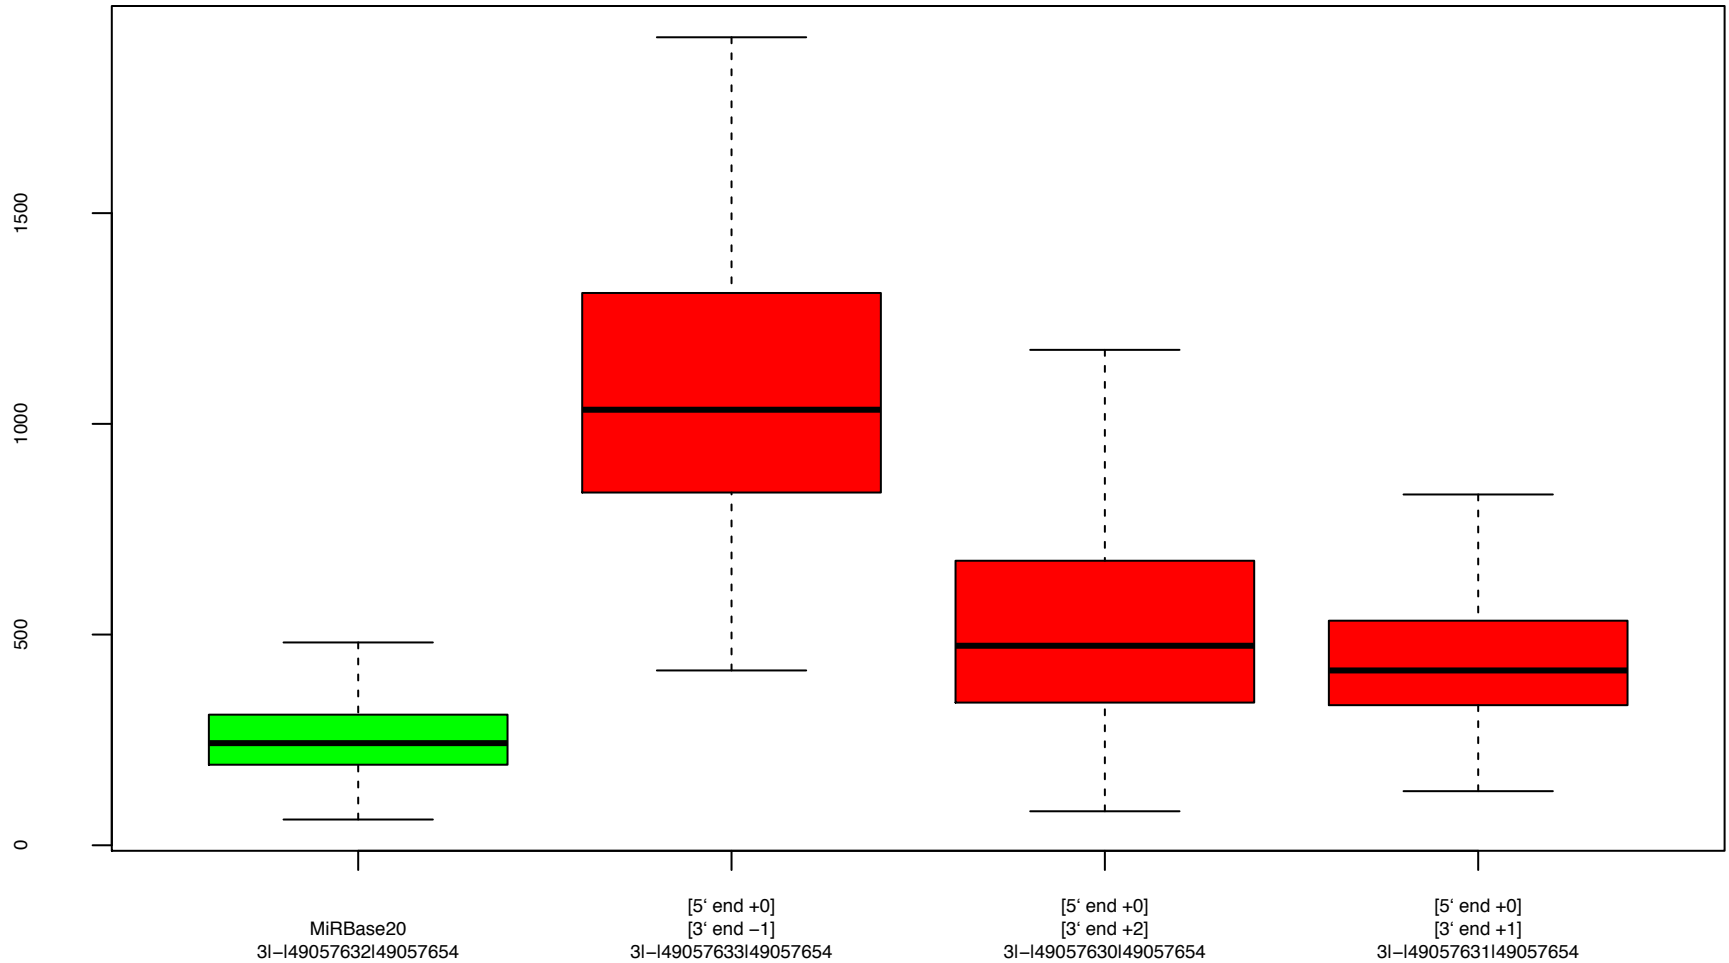

isomiRs

# MIMAT0000278=hsa-miR-221-3p=MI0000298

Quantile Normalized Counts

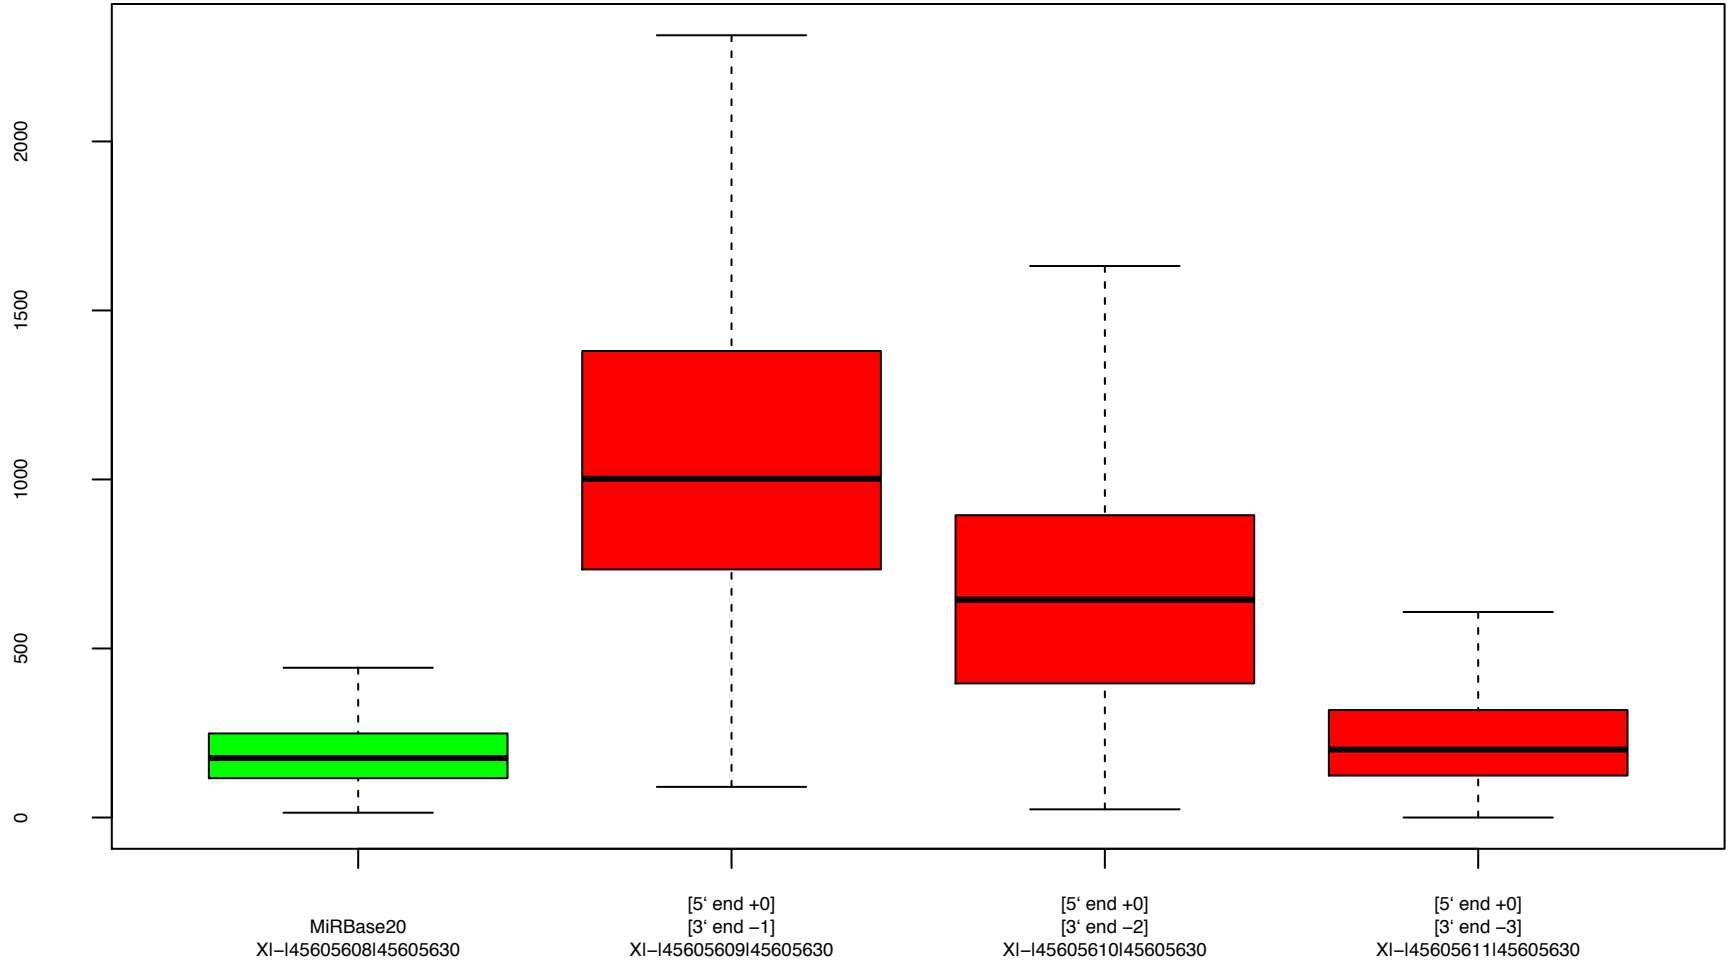

isomiRs

# MIMAT0003218=hsa-miR-92b-3p=MI0003560

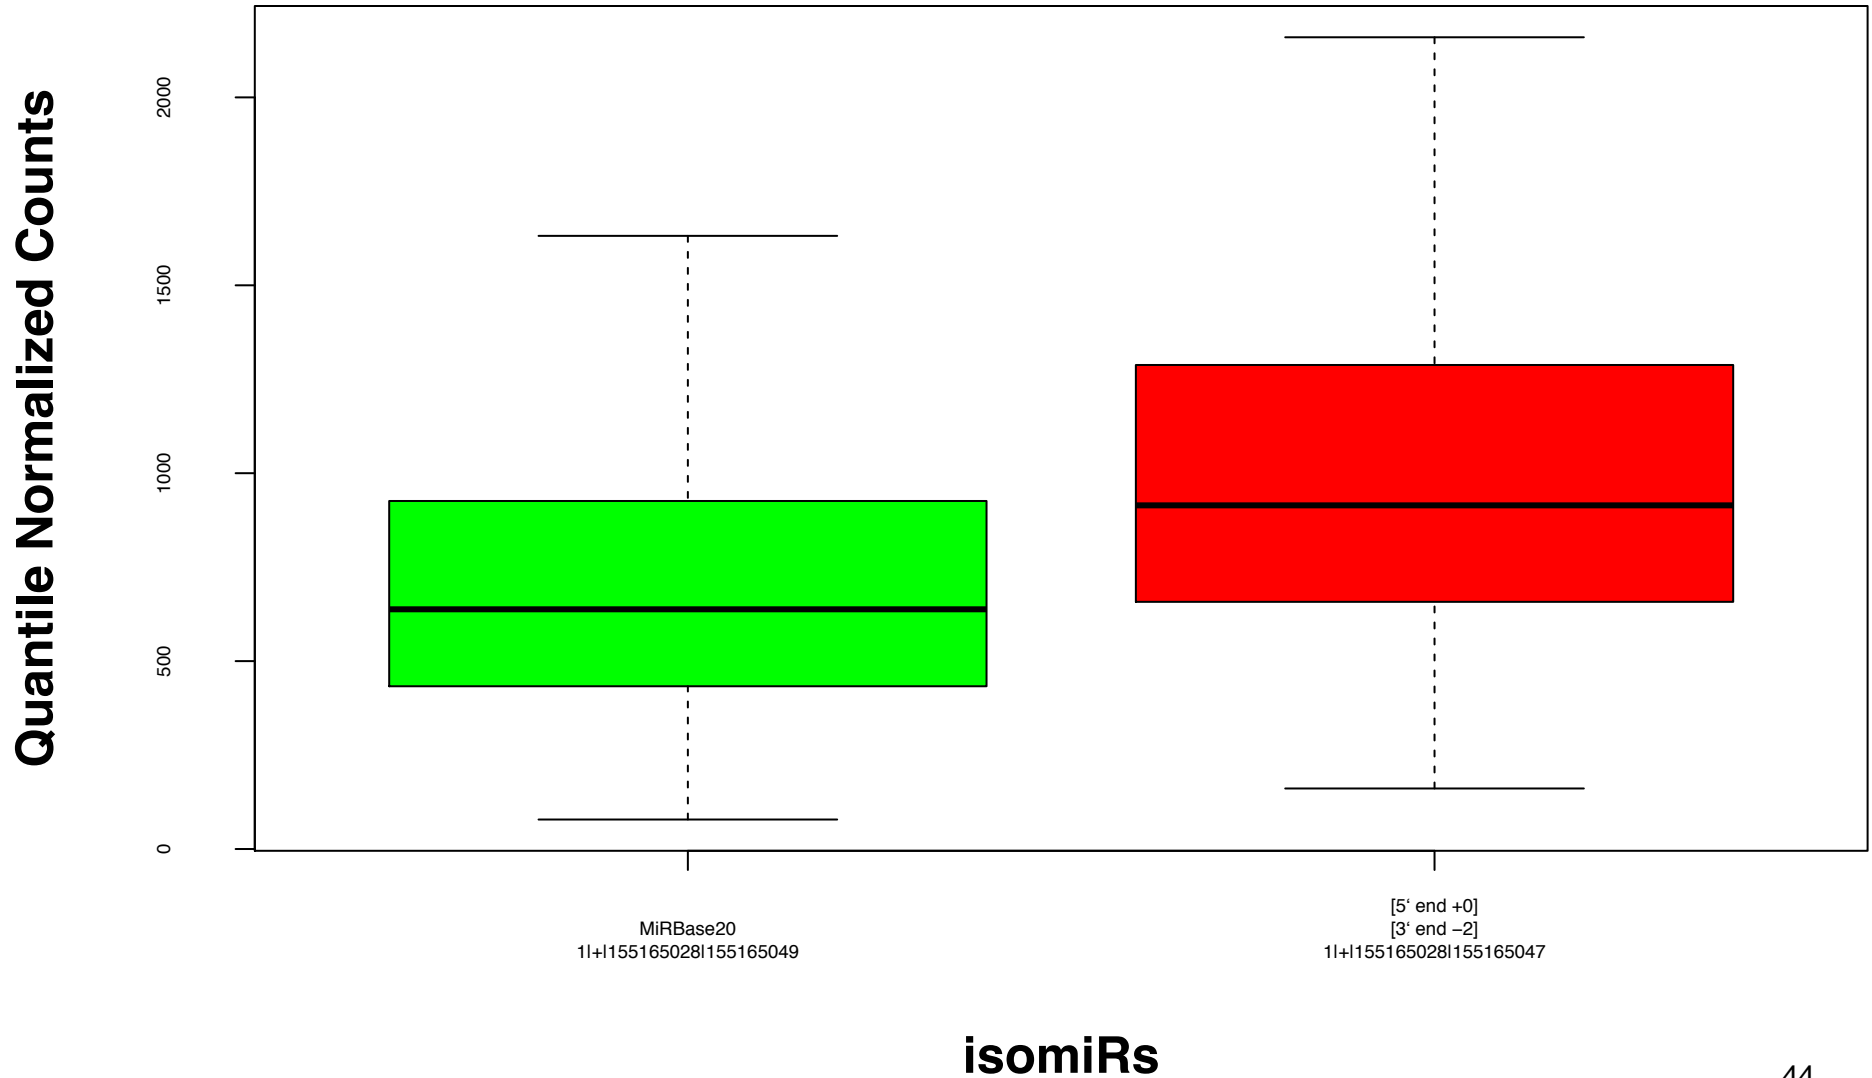

# MIMAT0000510=hsa-miR-320a=MI0000542

Quantile Normalized Counts

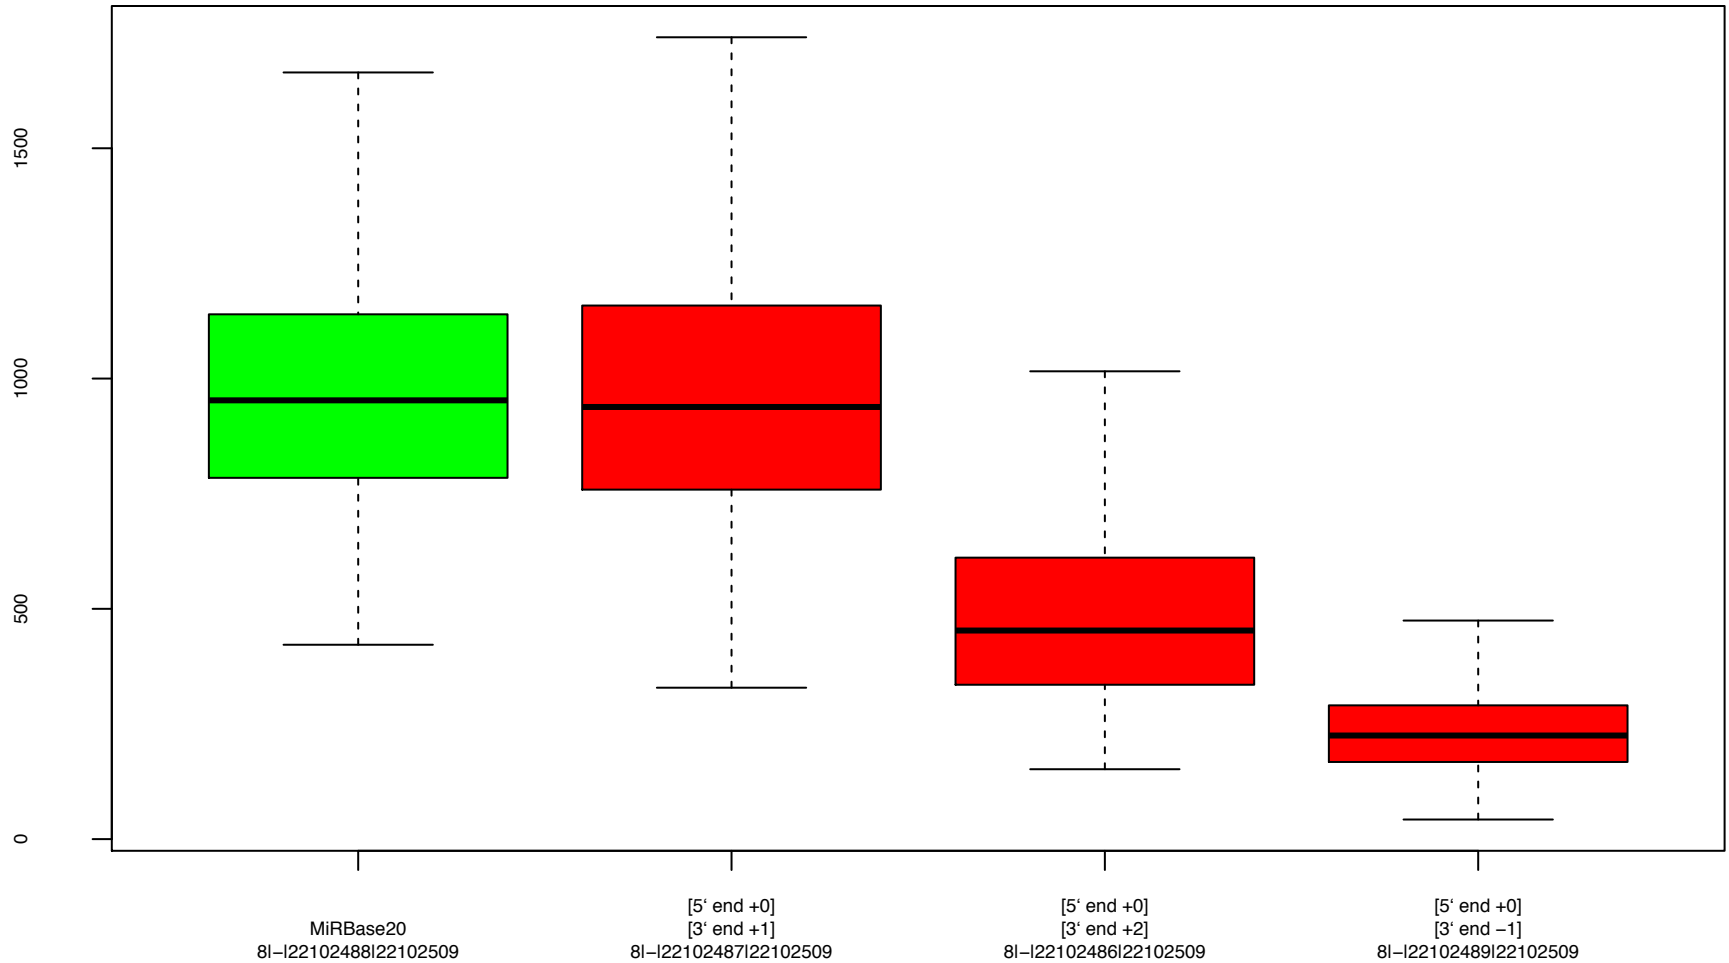

isomiRs

# MIMAT0000759=hsa-miR-148b-3p=MI0000811

Quantile Normalized Counts

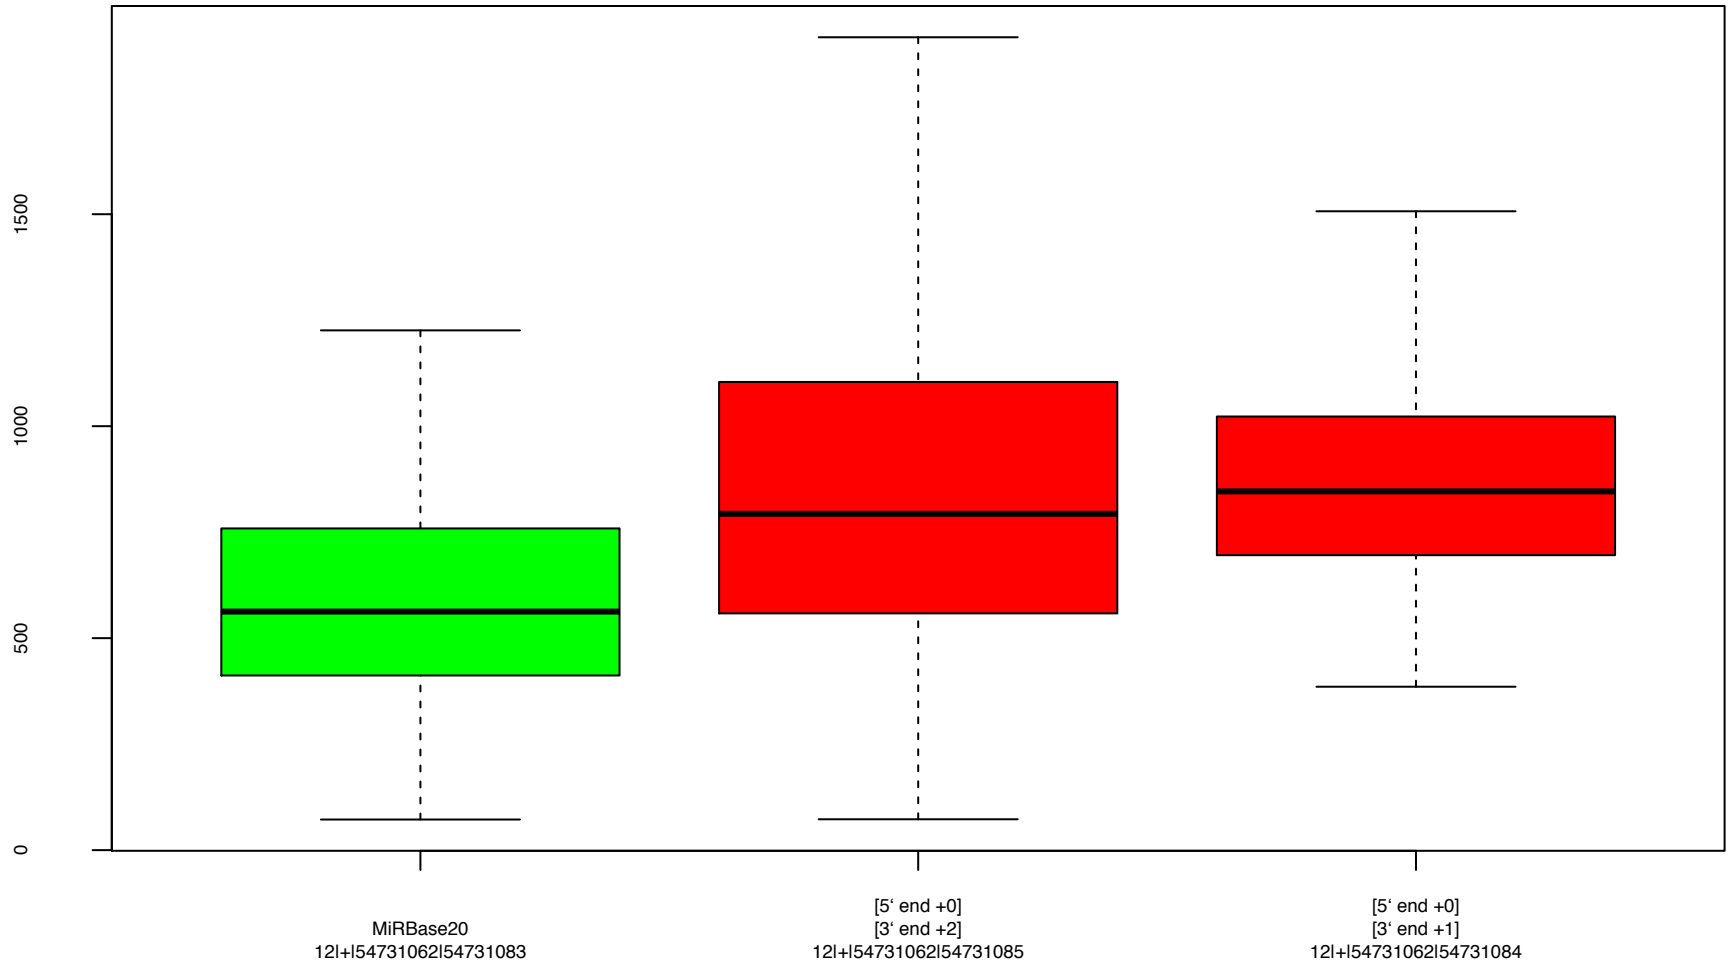

isomiRs

# MIMAT0004558=hsa-miR-181a-2-3p=MI0000269

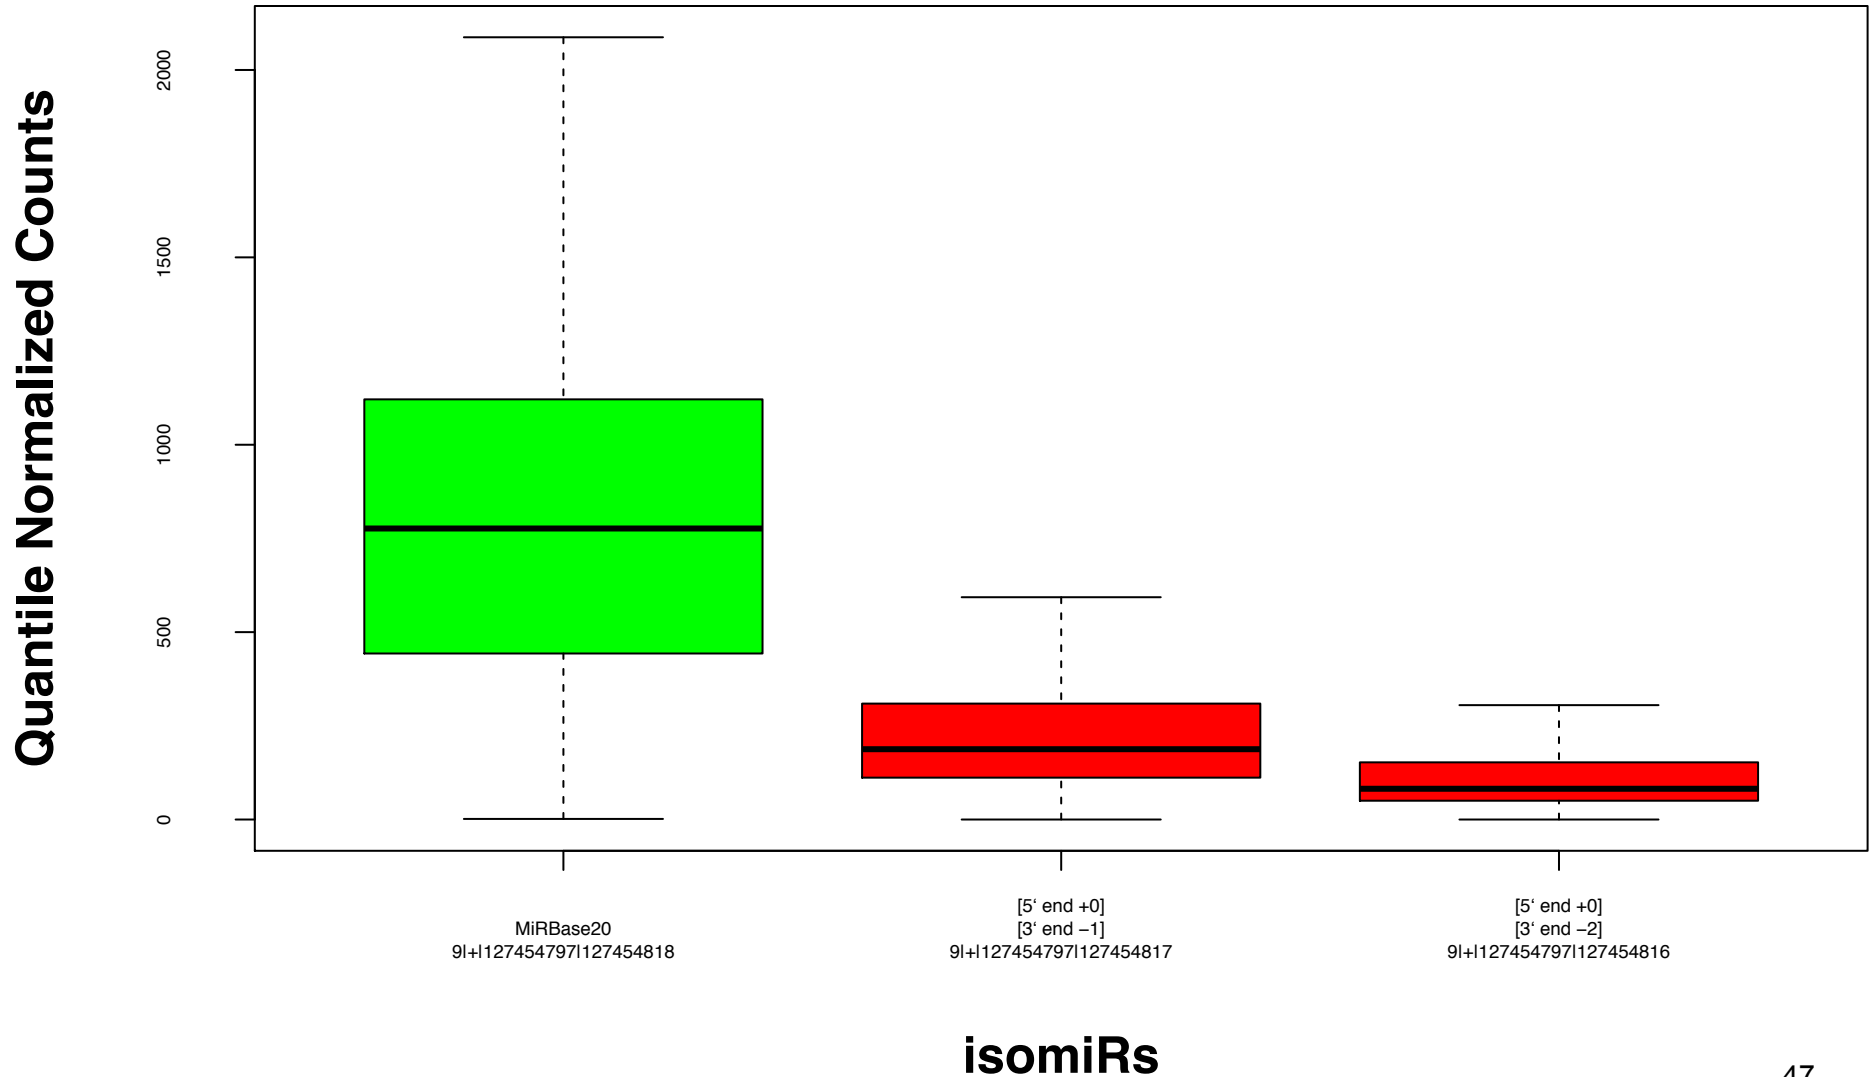



# MIMAT0000259=hsa-miR-182-5p=MI0000272

Quantile Normalized Counts

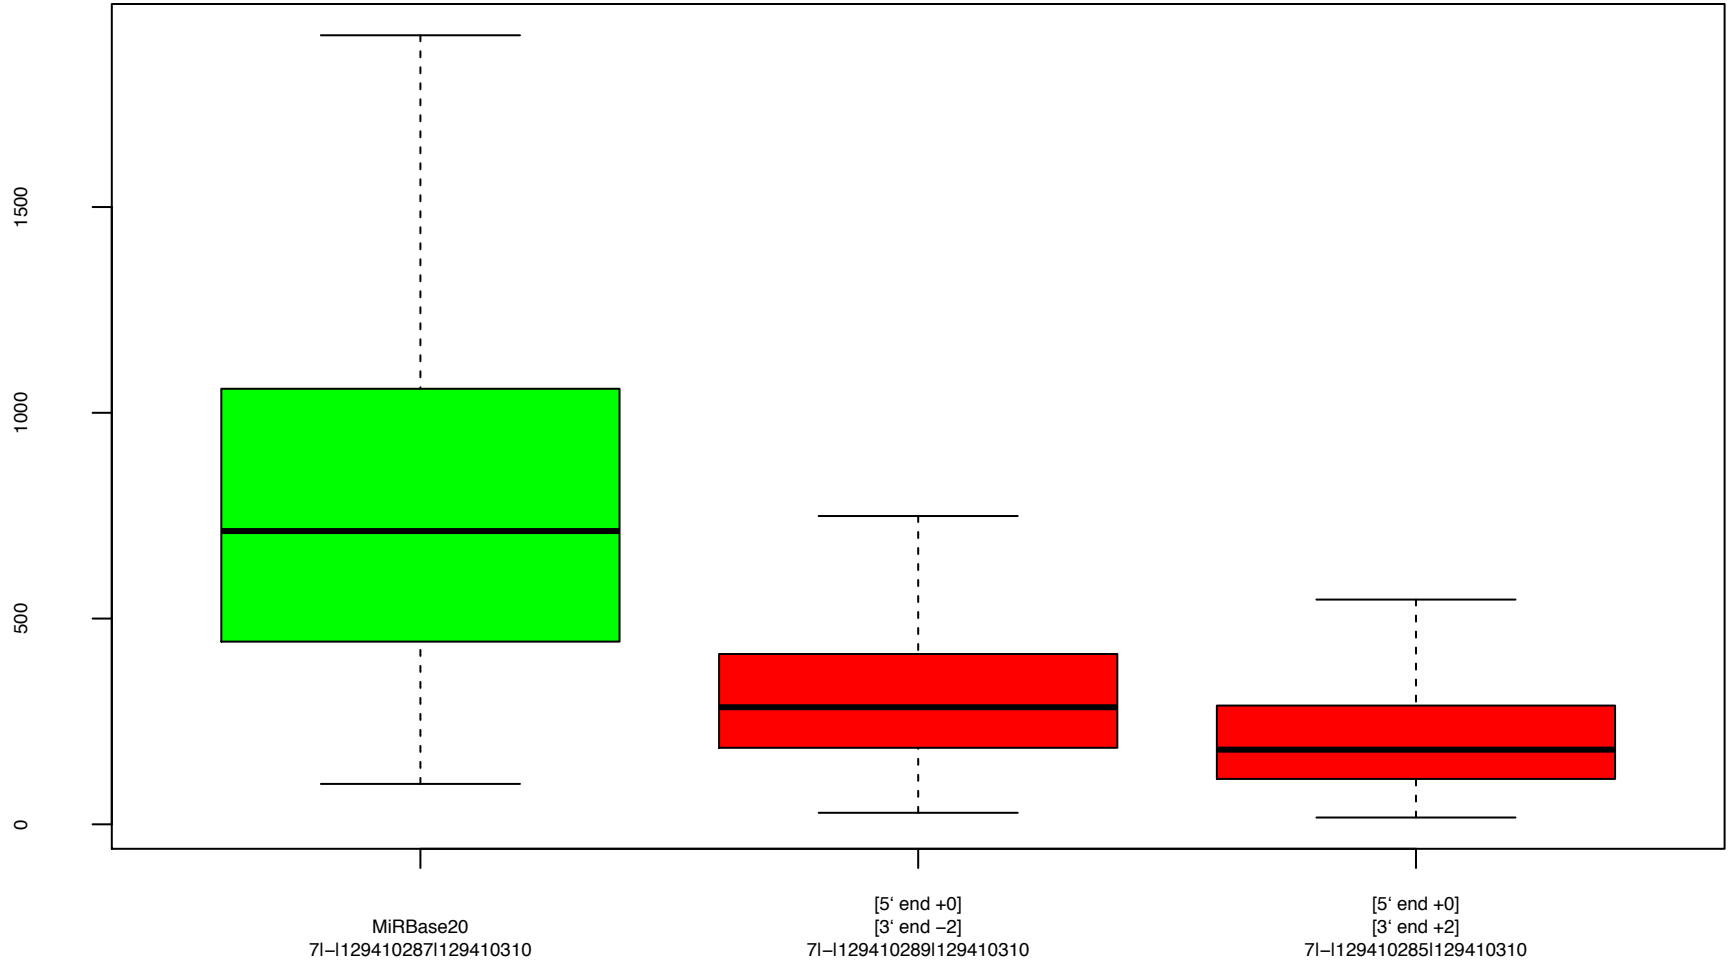

isomiRs

# MIMAT0000757=hsa-miR-151a-3p=MI0000809

Quantile Normalized Counts

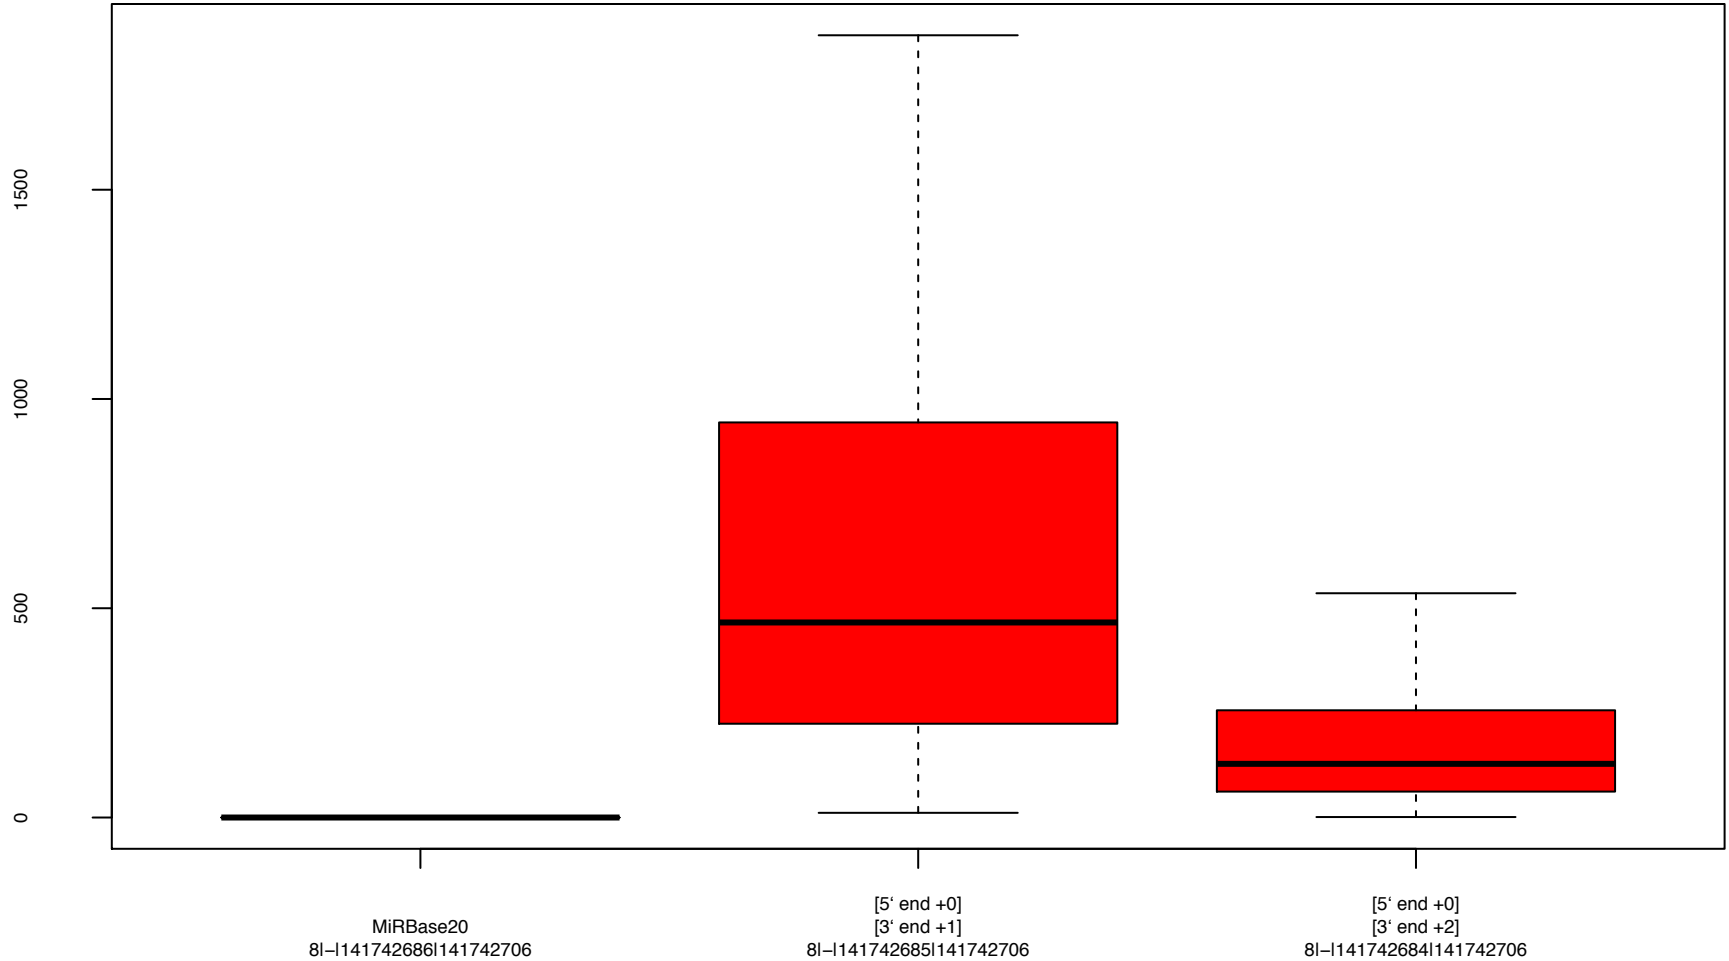

isomiRs

# MIMAT0000258=hsa-miR-181c-5p=MI0000271

Quantile Normalized Counts

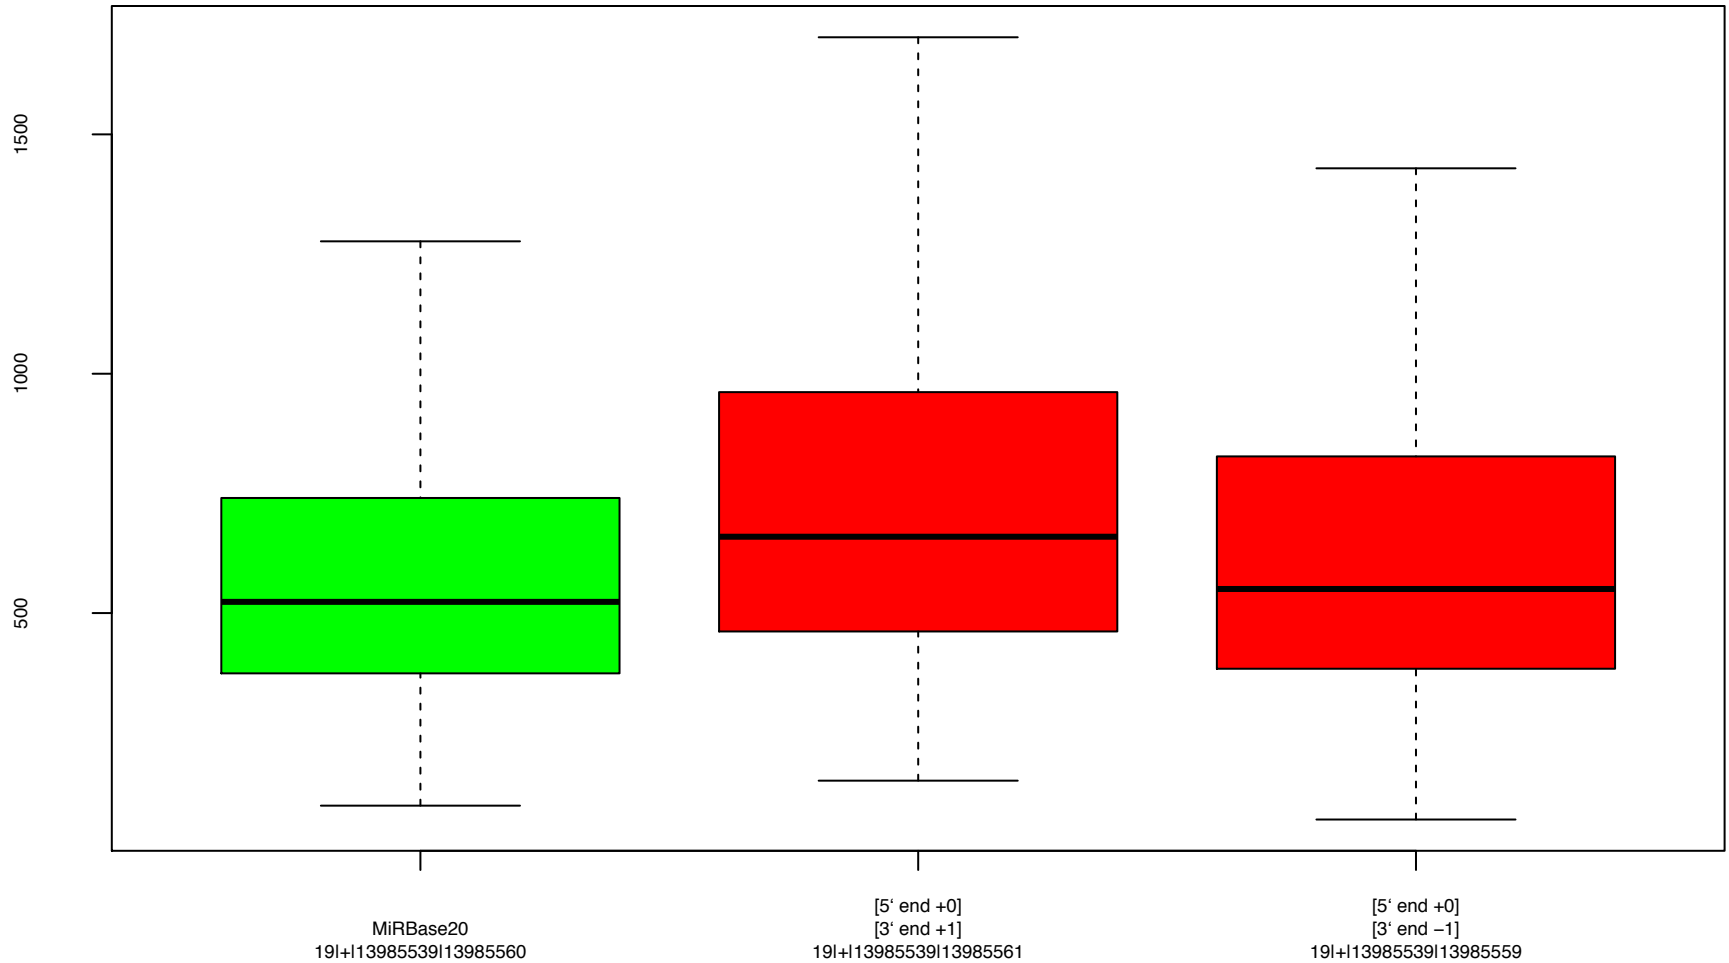

isomiRs

# MIMAT0000279=hsa-miR-222-3p=MI0000299

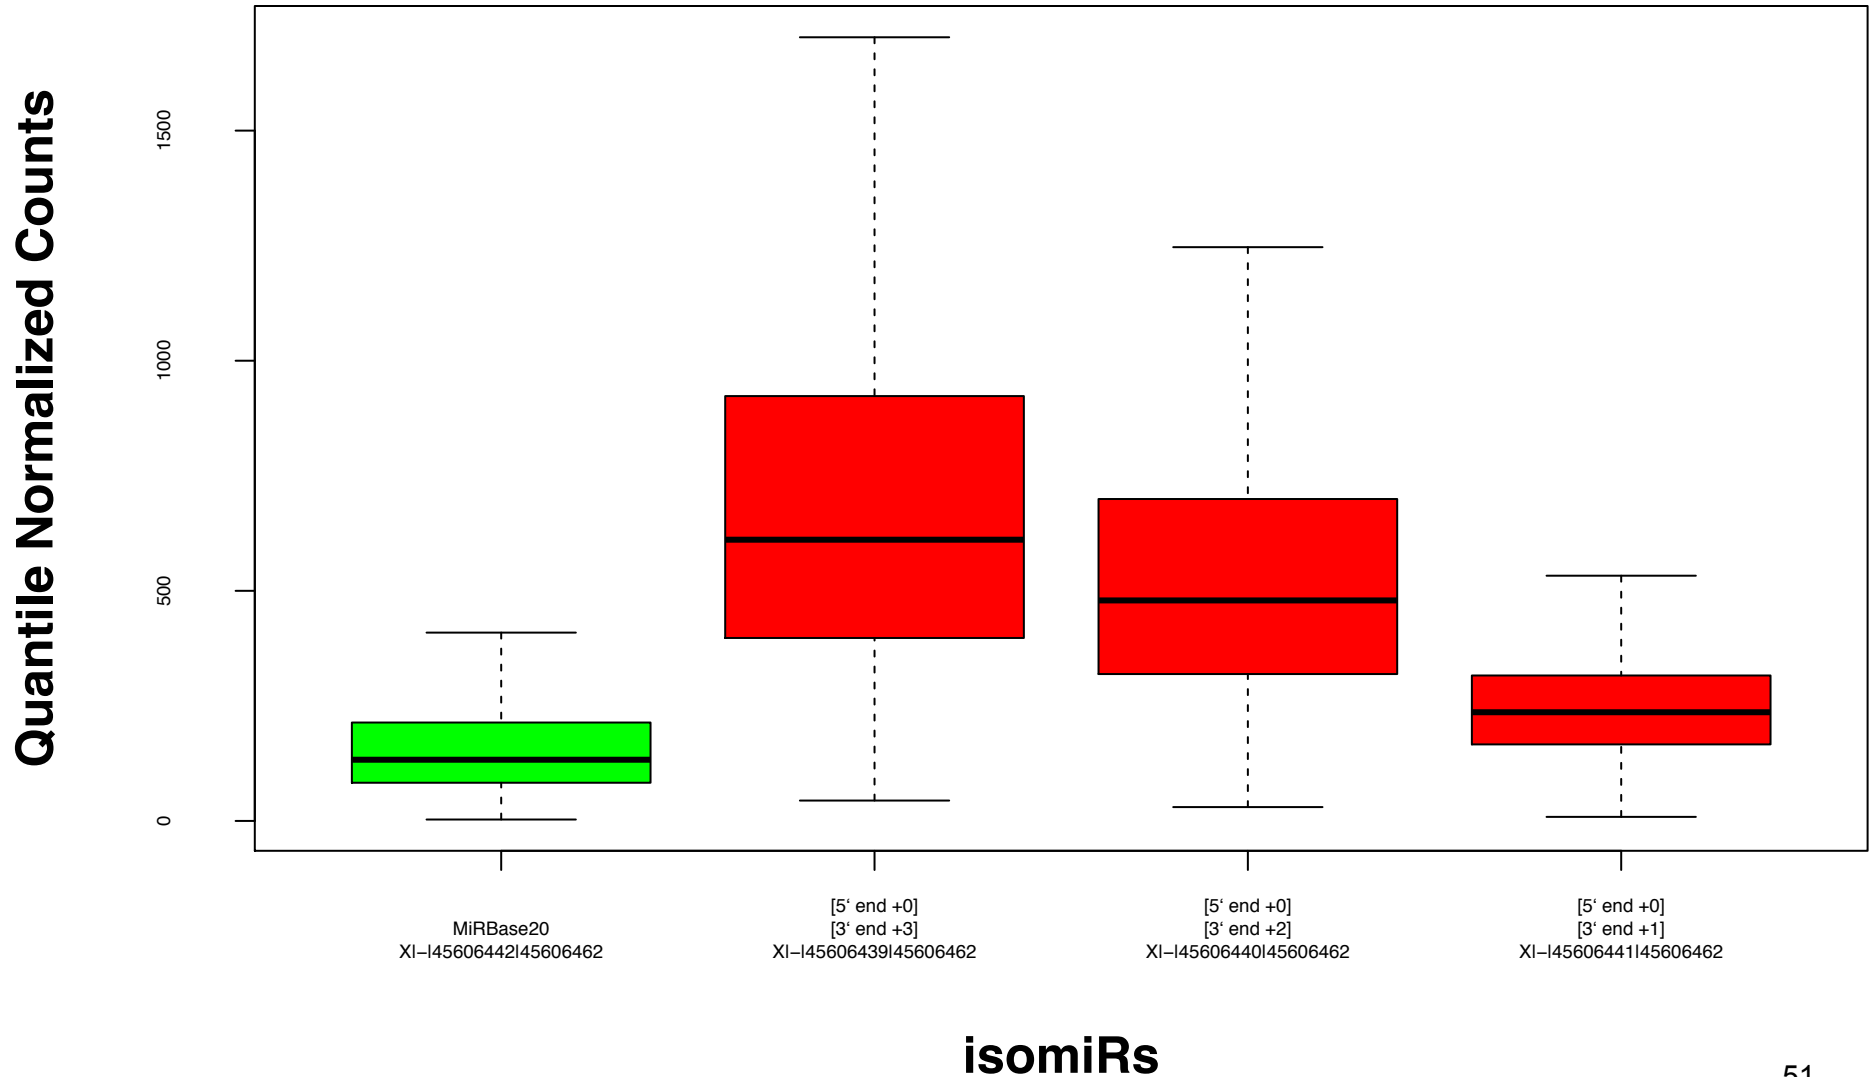

# MIMAT0004672=hsa-miR-106b-3p=MI0000734

Quantile Normalized Counts

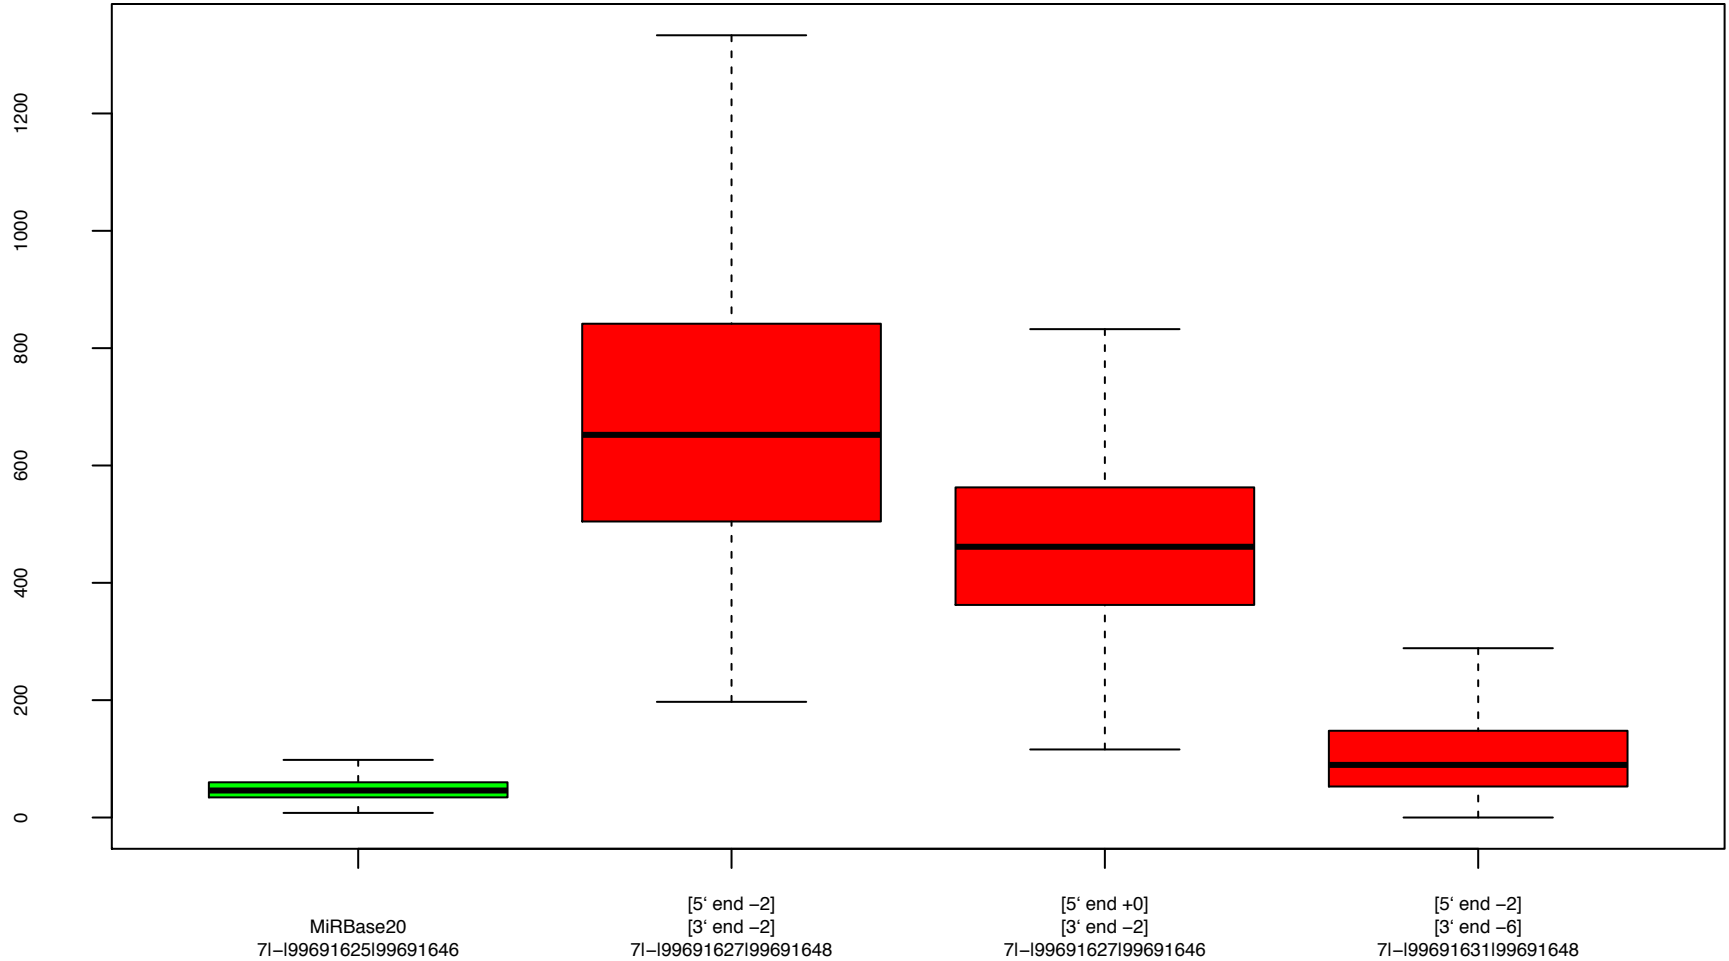

isomiRs

# MIMAT0004597=hsa-miR-140-3p=MI0000456

Quantile Normalized Counts

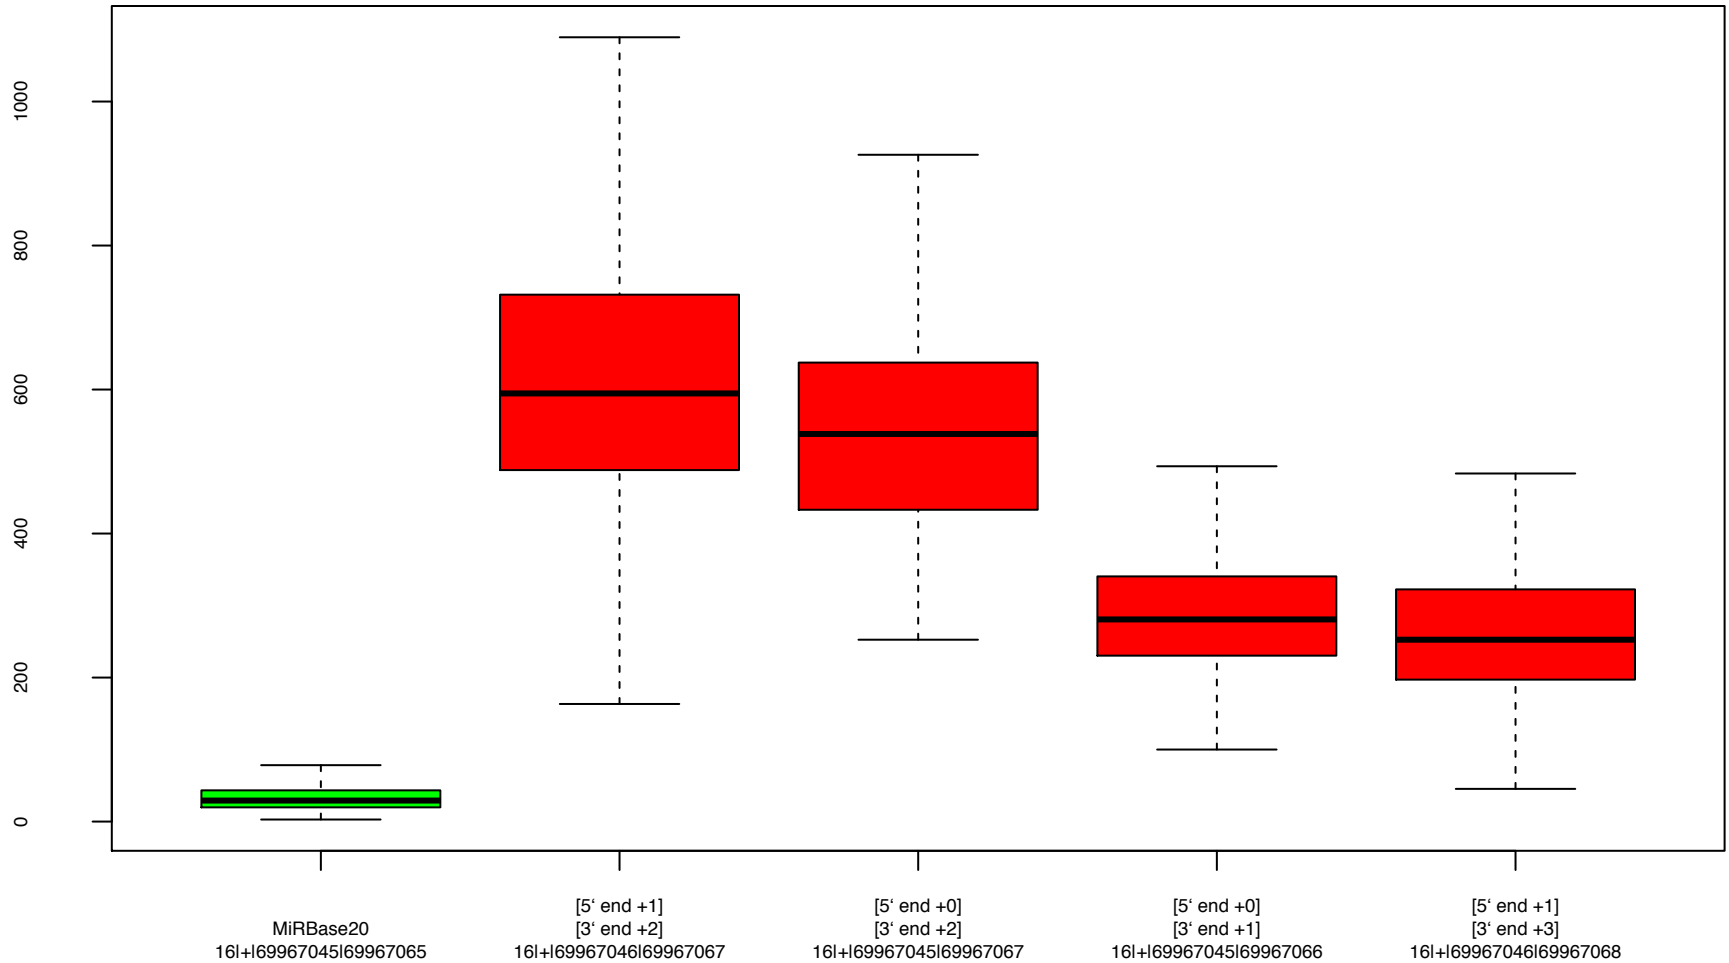

isomiRs

# MIMAT0004702=hsa-miR-339-3p=MI0000815

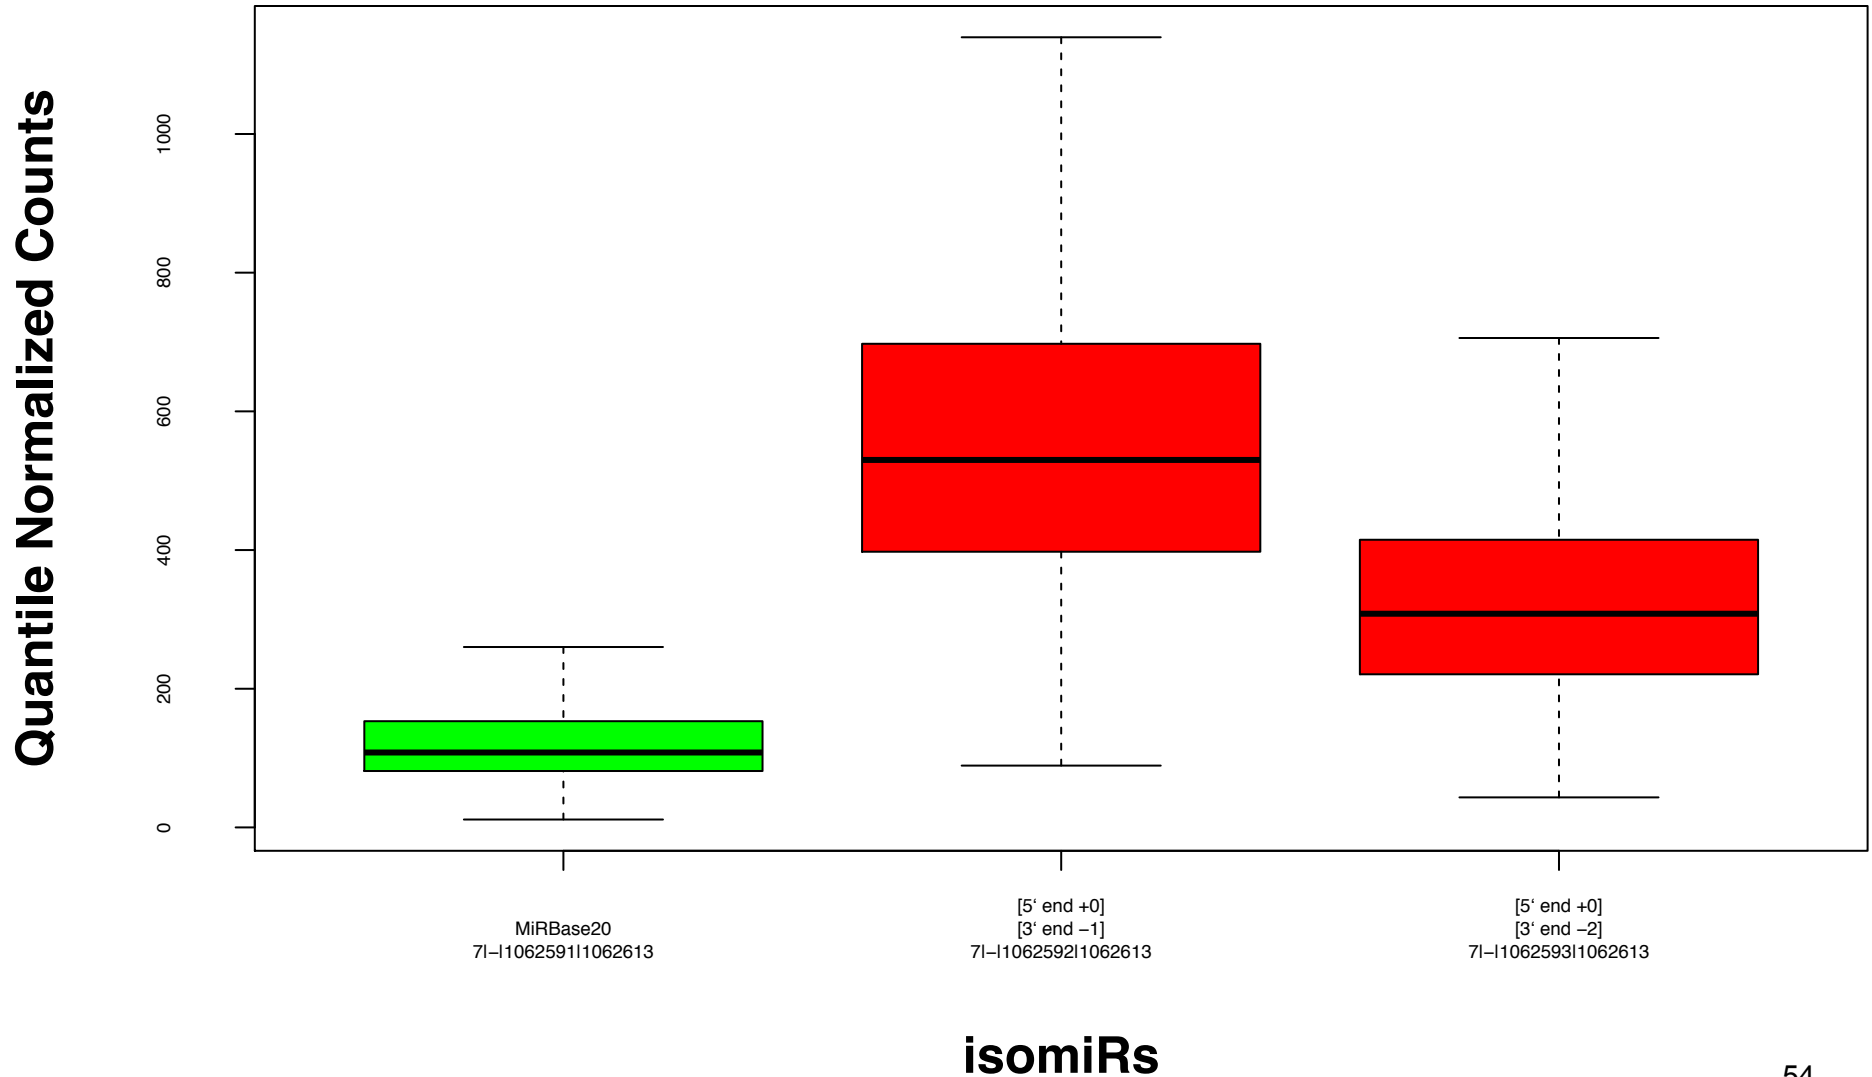

# MIMAT0000434=hsa-miR-142-3p=MI0000458

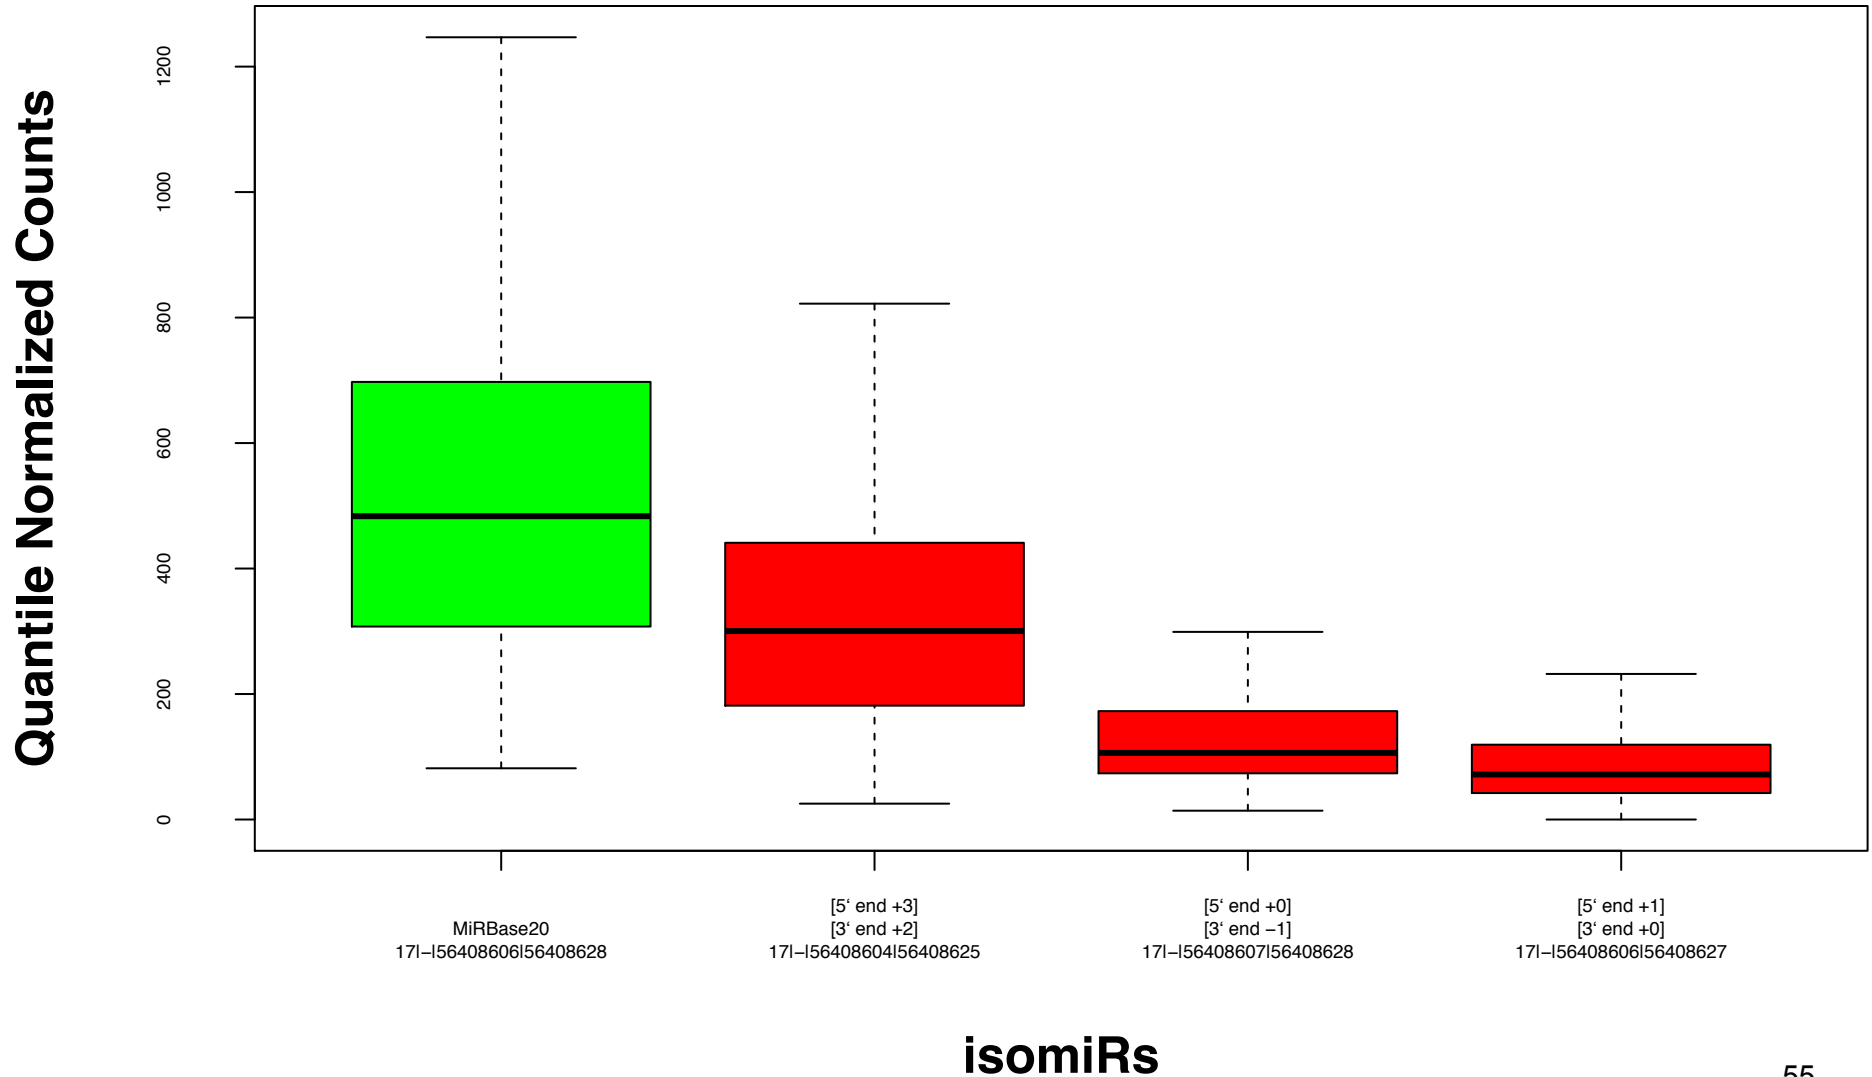



# MIMAT0000435=hsa-miR-143-3p=MI0000459

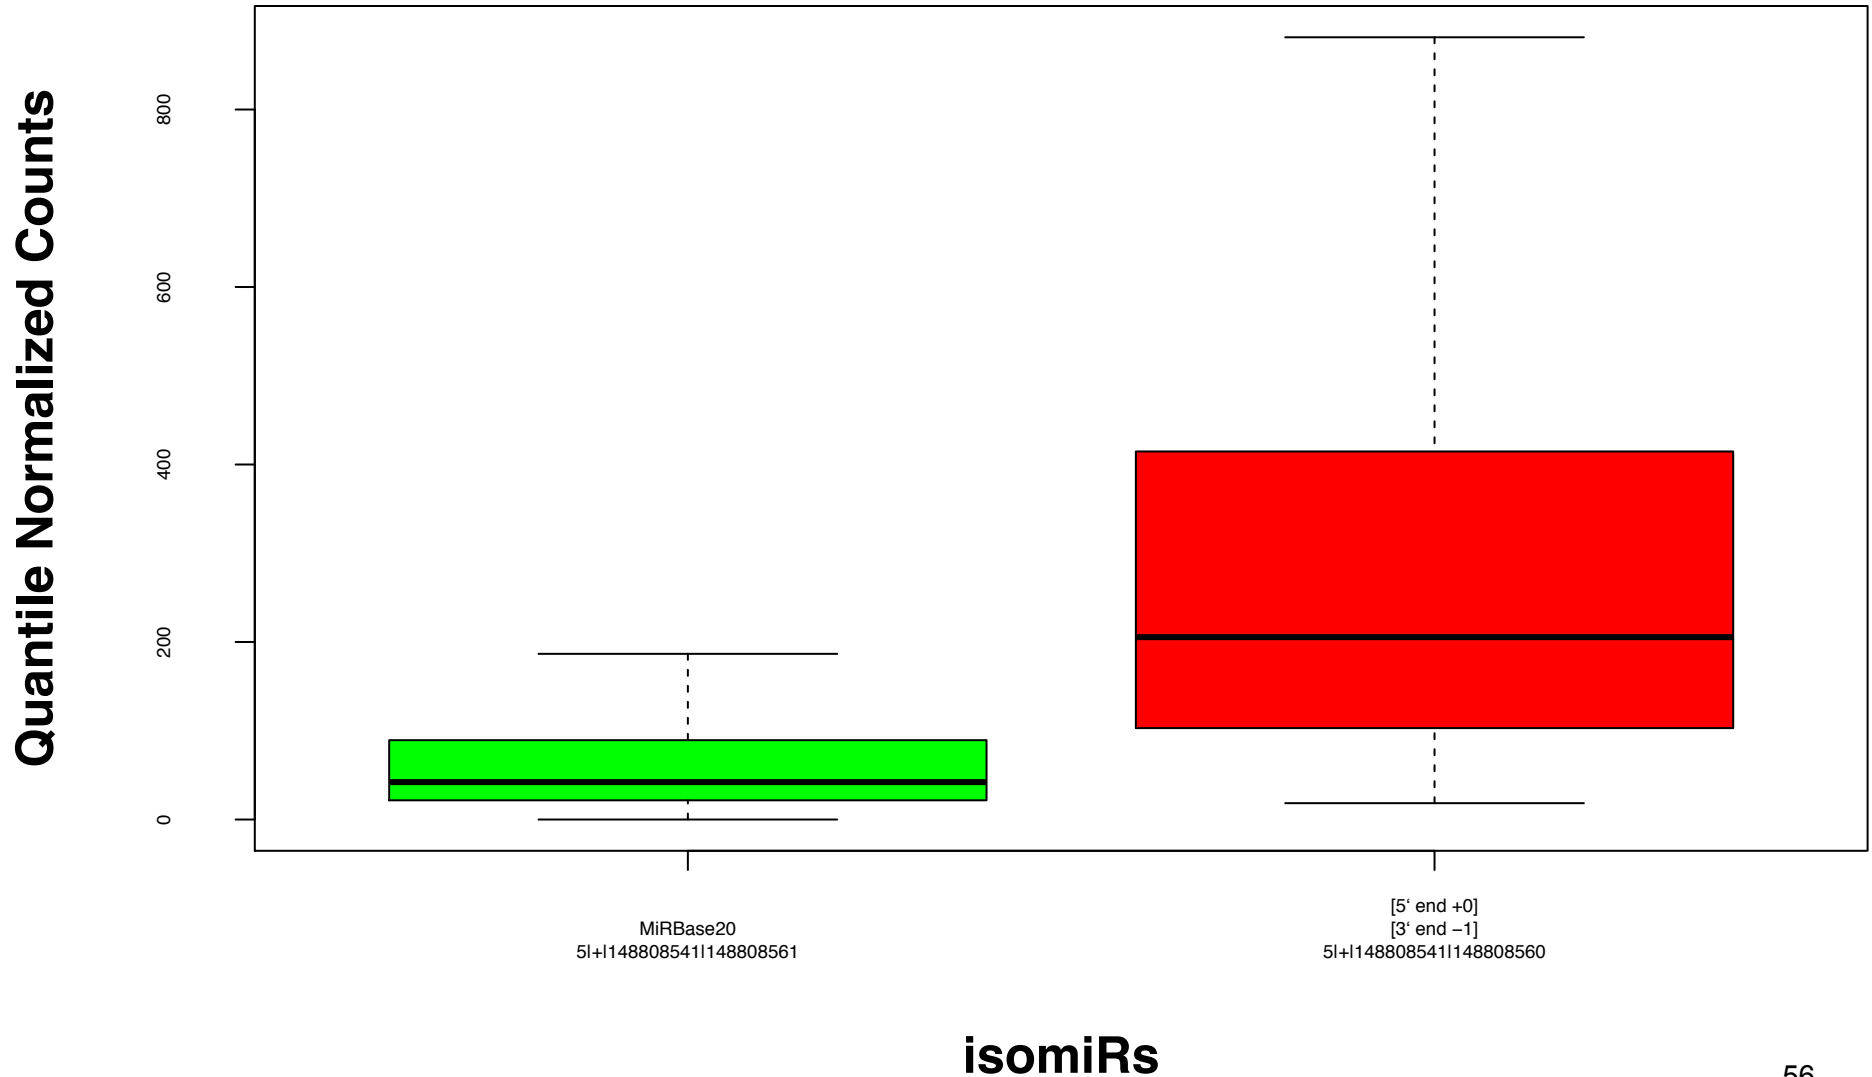

# MIMAT0000255=hsa-miR-34a-5p=MI0000268

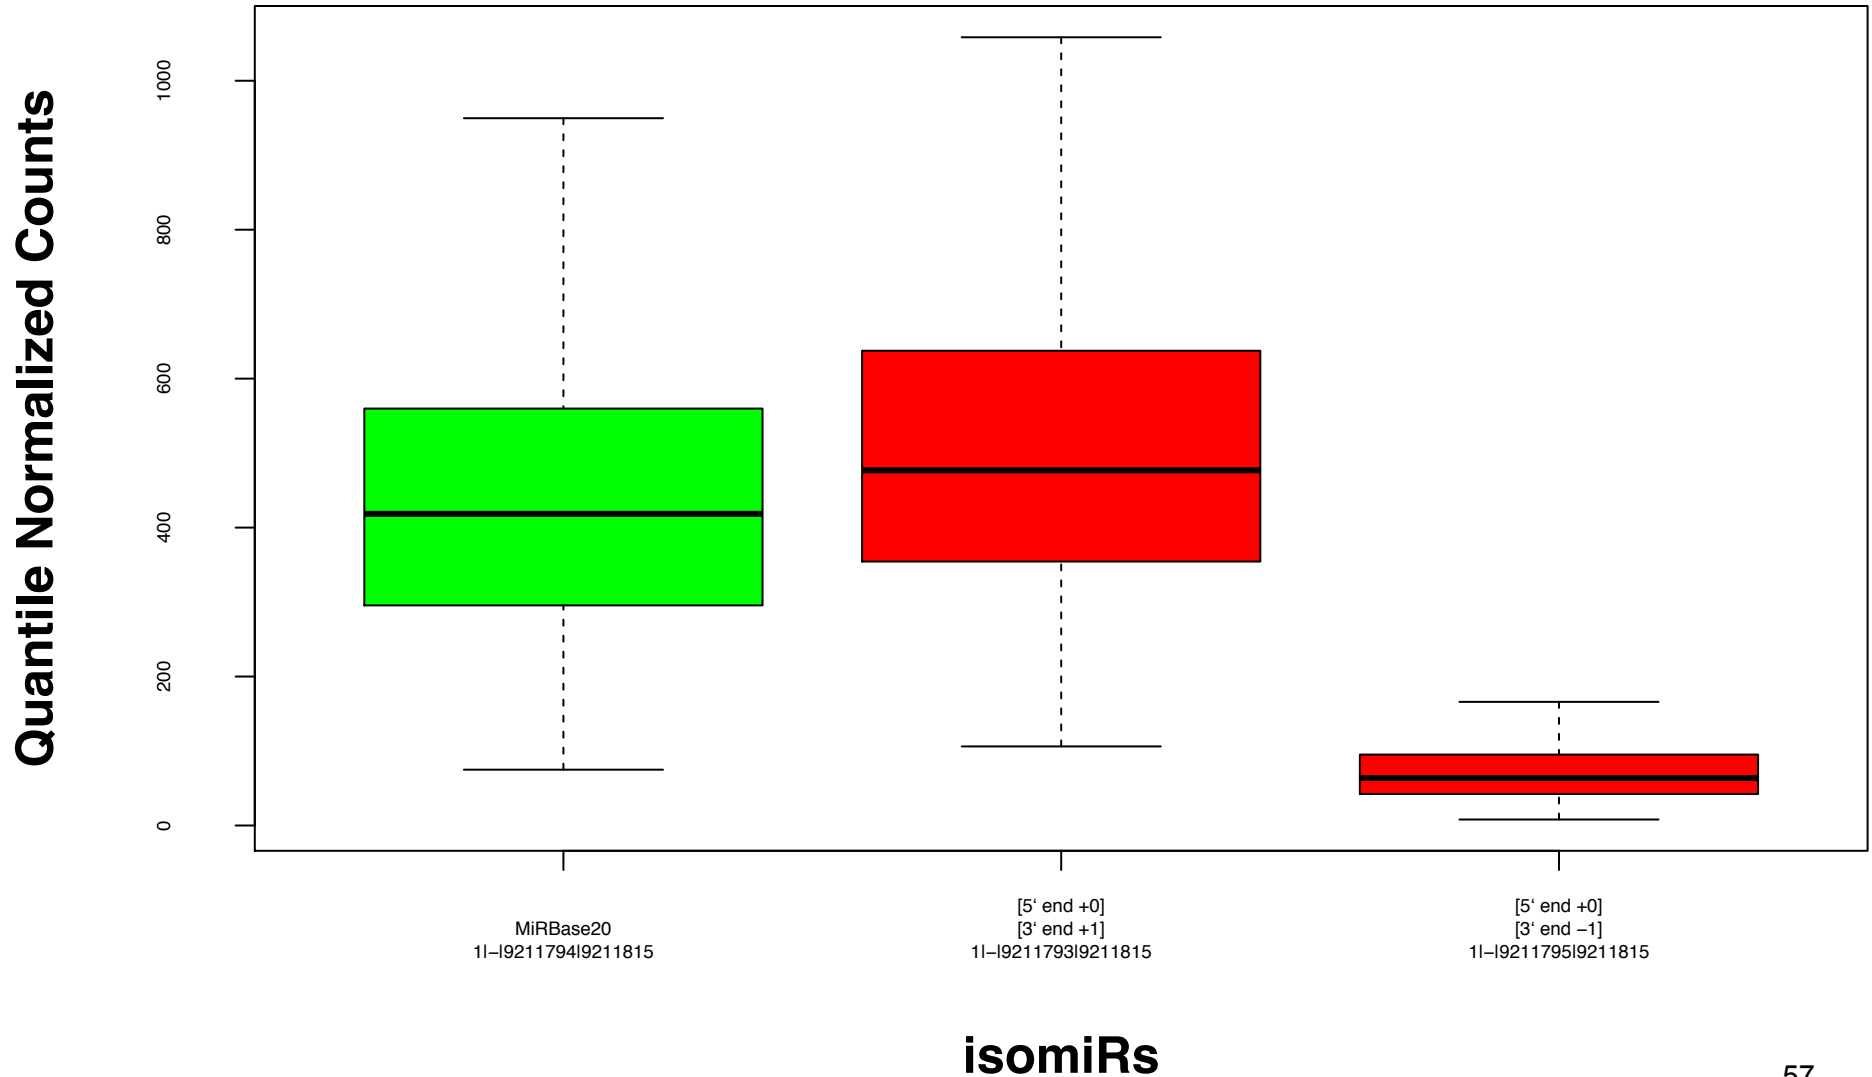

# MIMAT0030021=hsa-miR-7706=MI0025242

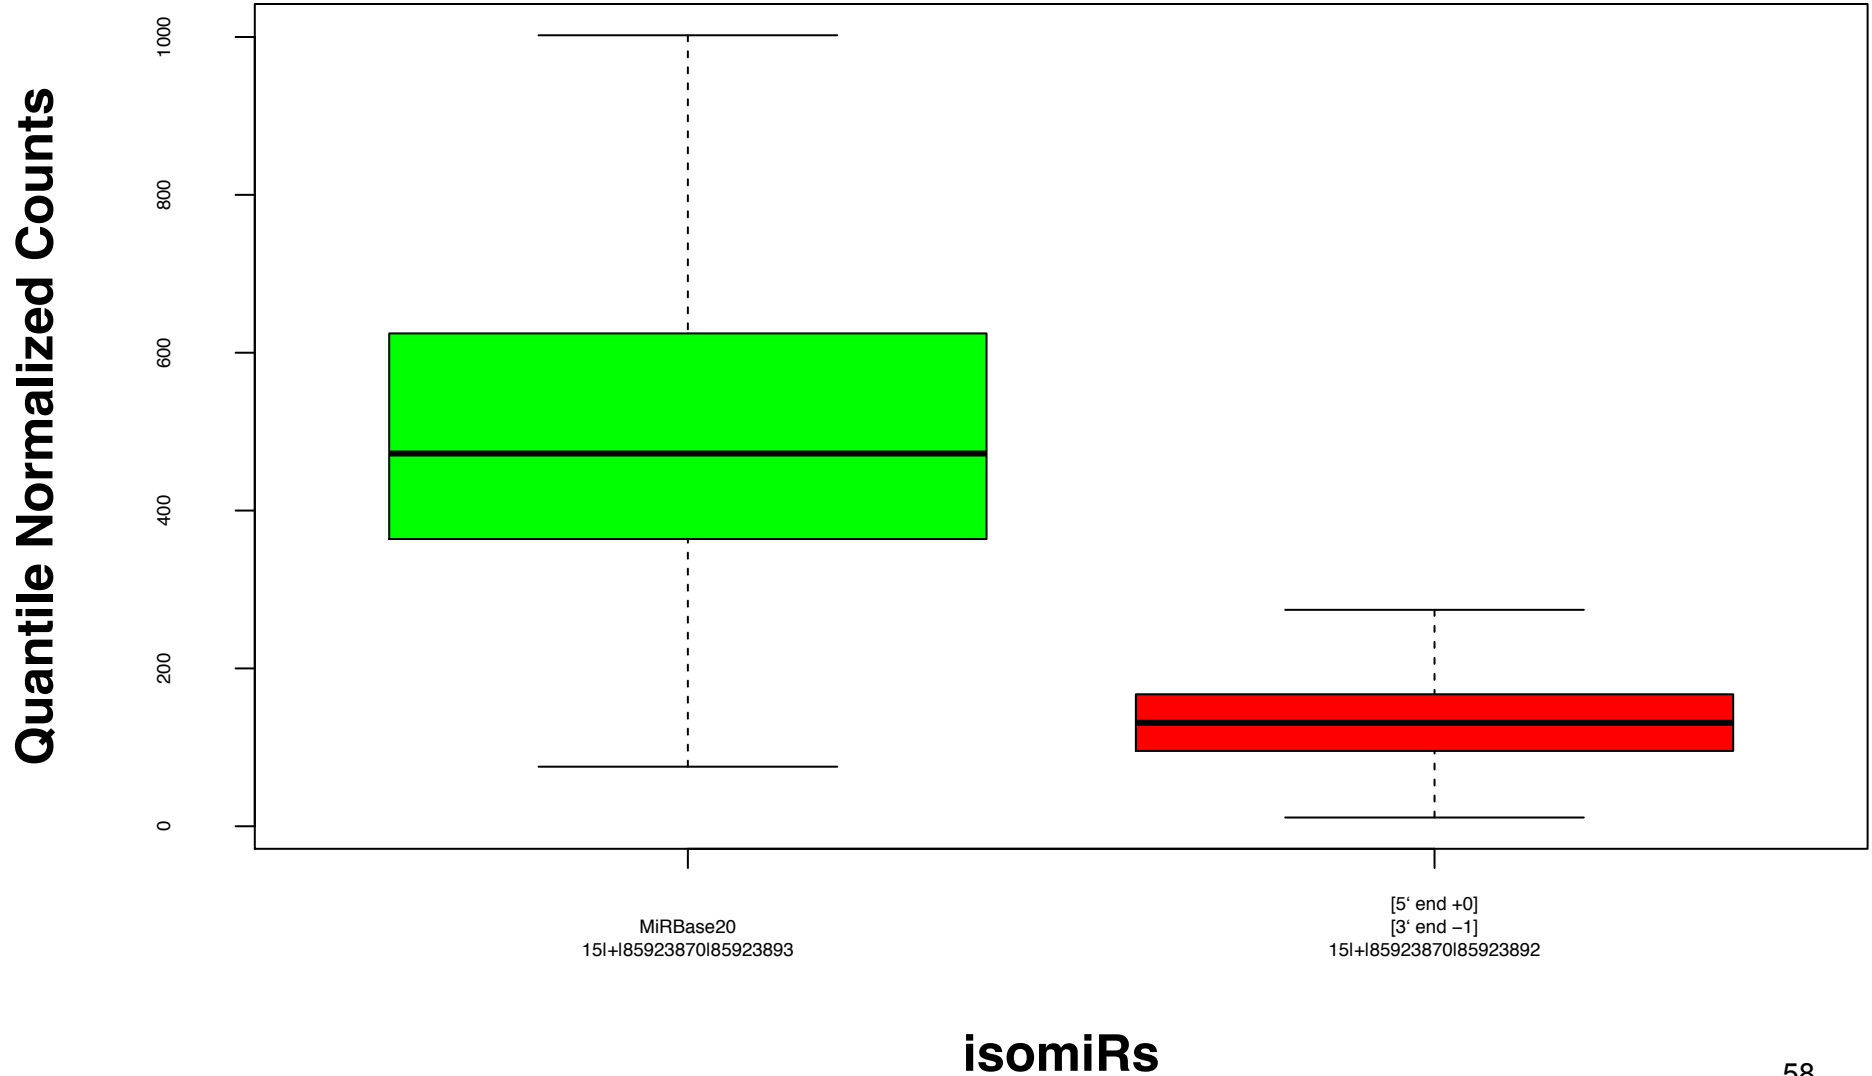

# MIMAT0004682=hsa-miR-361-3p=MI0000760

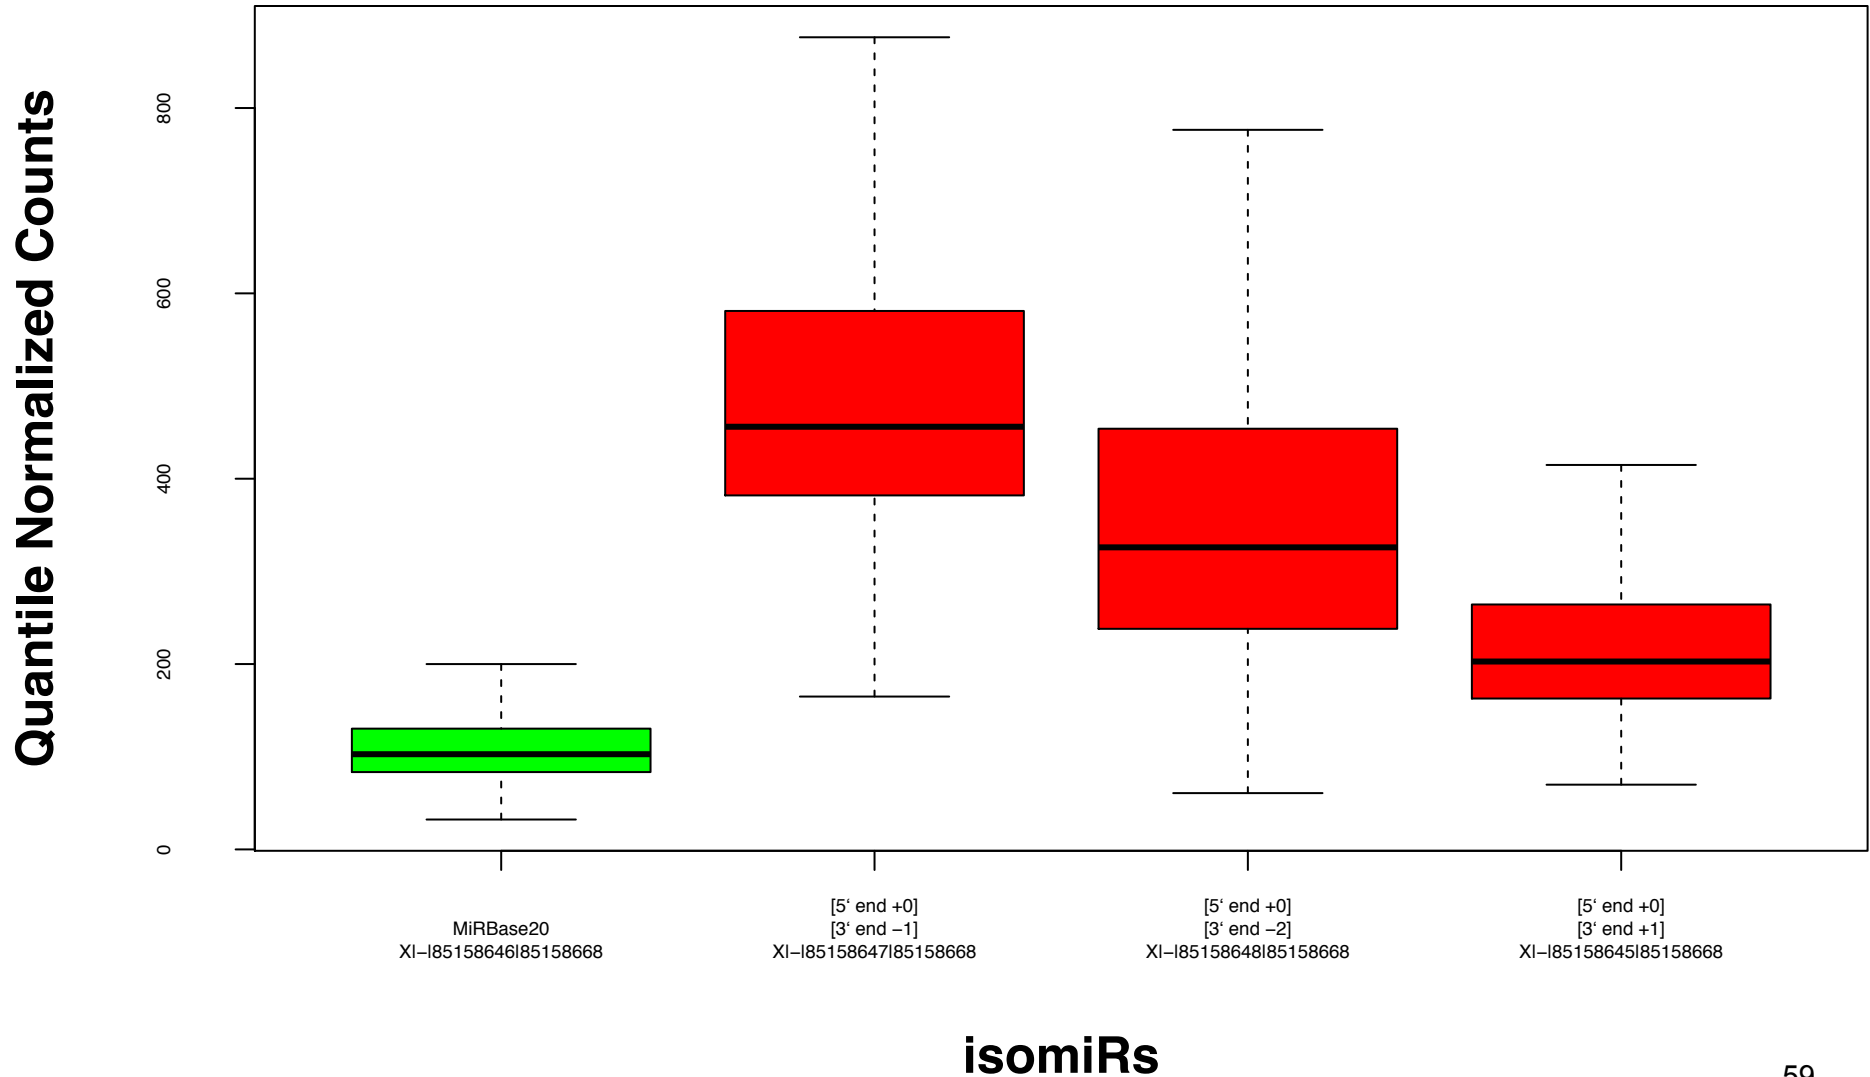

# MIMAT0002174=hsa-miR-484=MI0002468

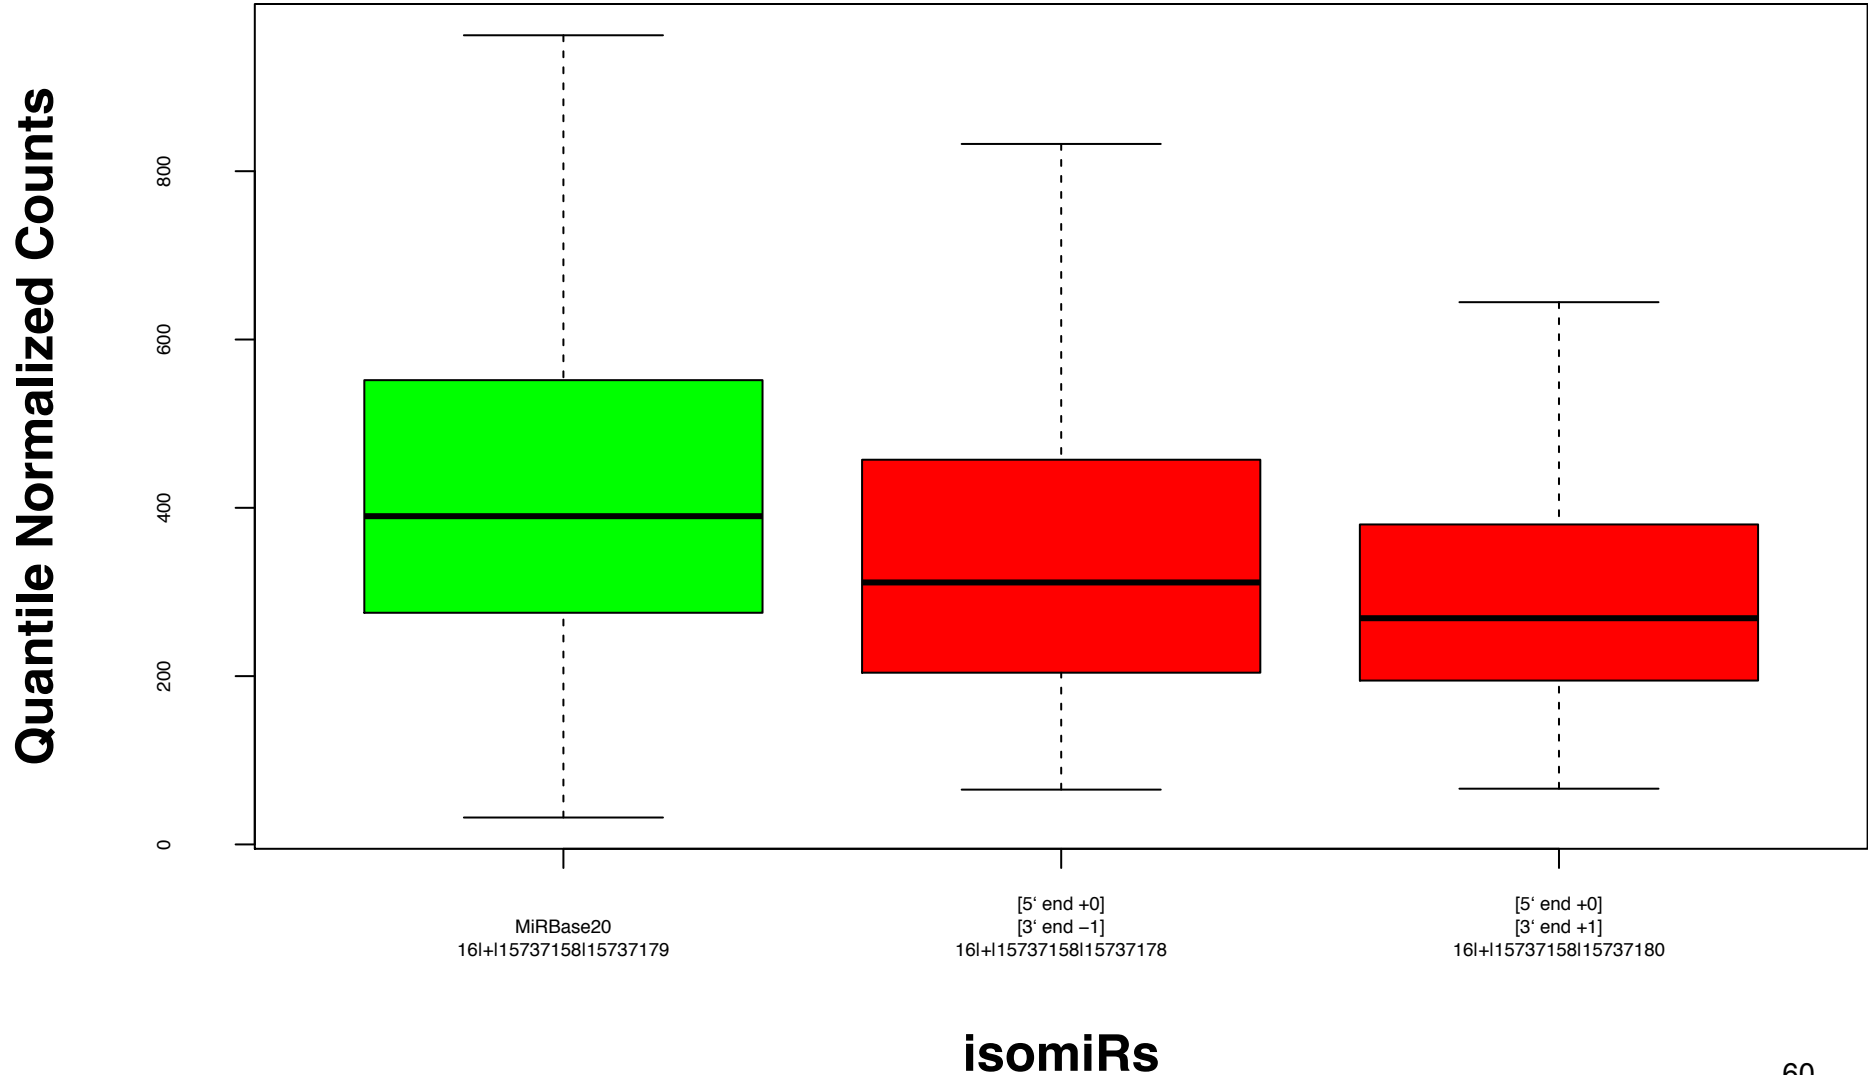

# MIMAT0002871=hsa-miR-500a-3p=MI0003184

Quantile Normalized Counts

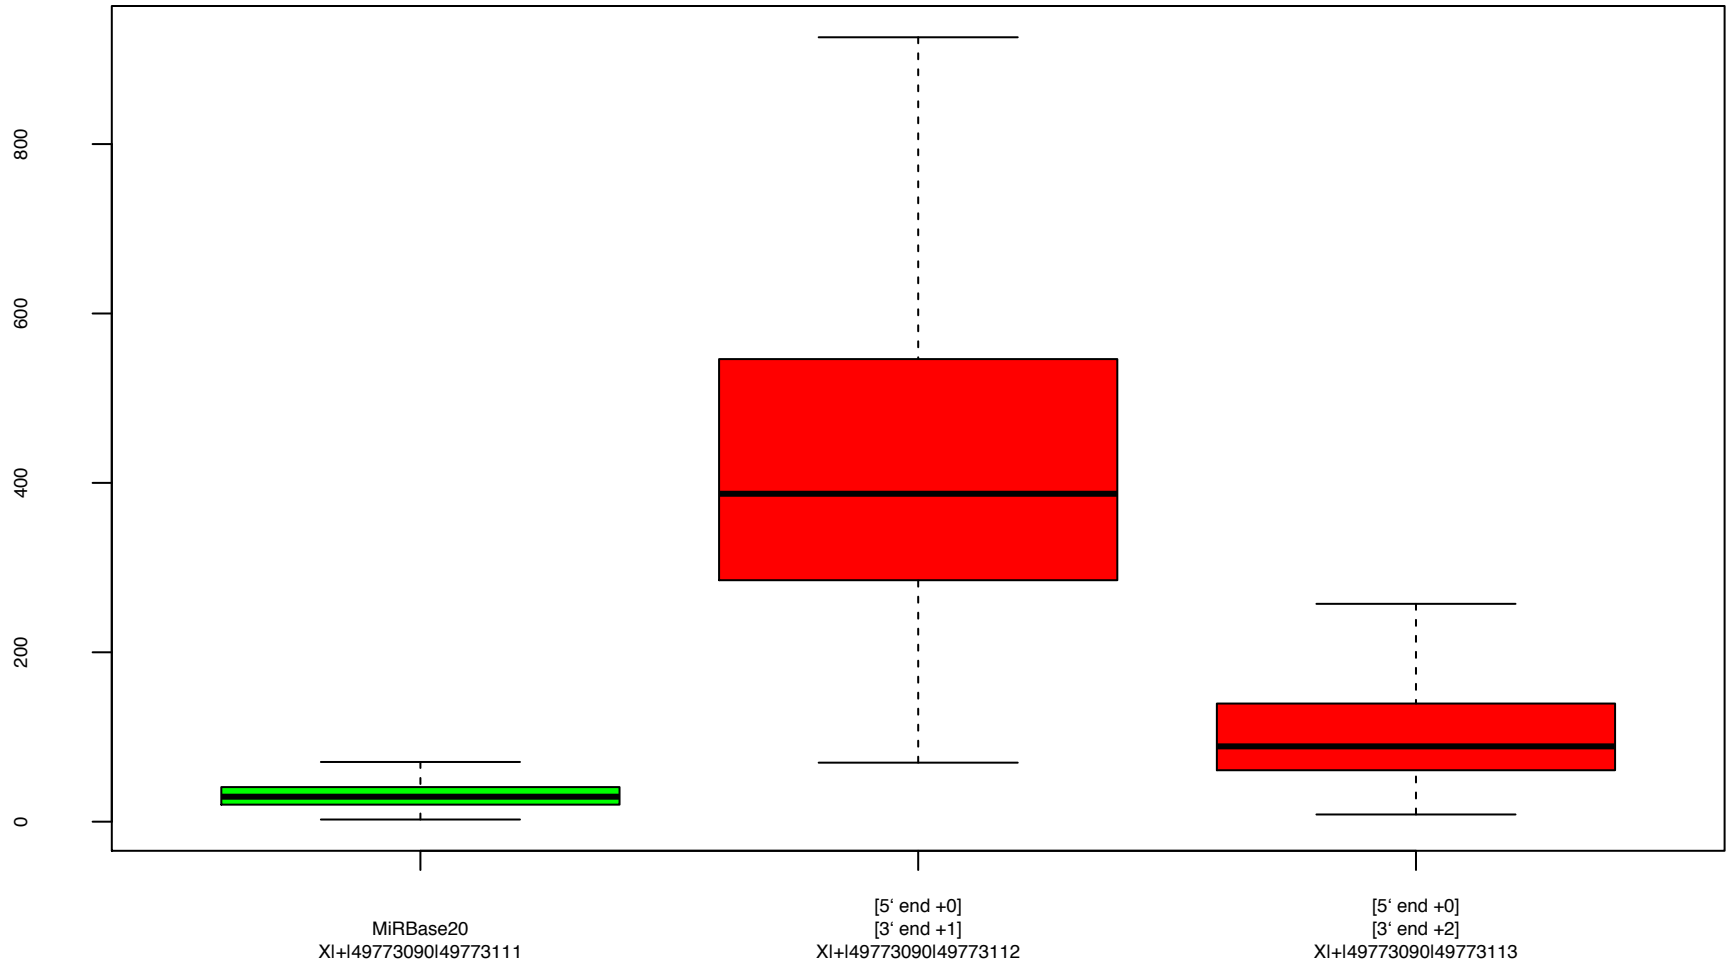

isomiRs

# MIMAT0000063=hsa-let-7b-5p=MI0000063

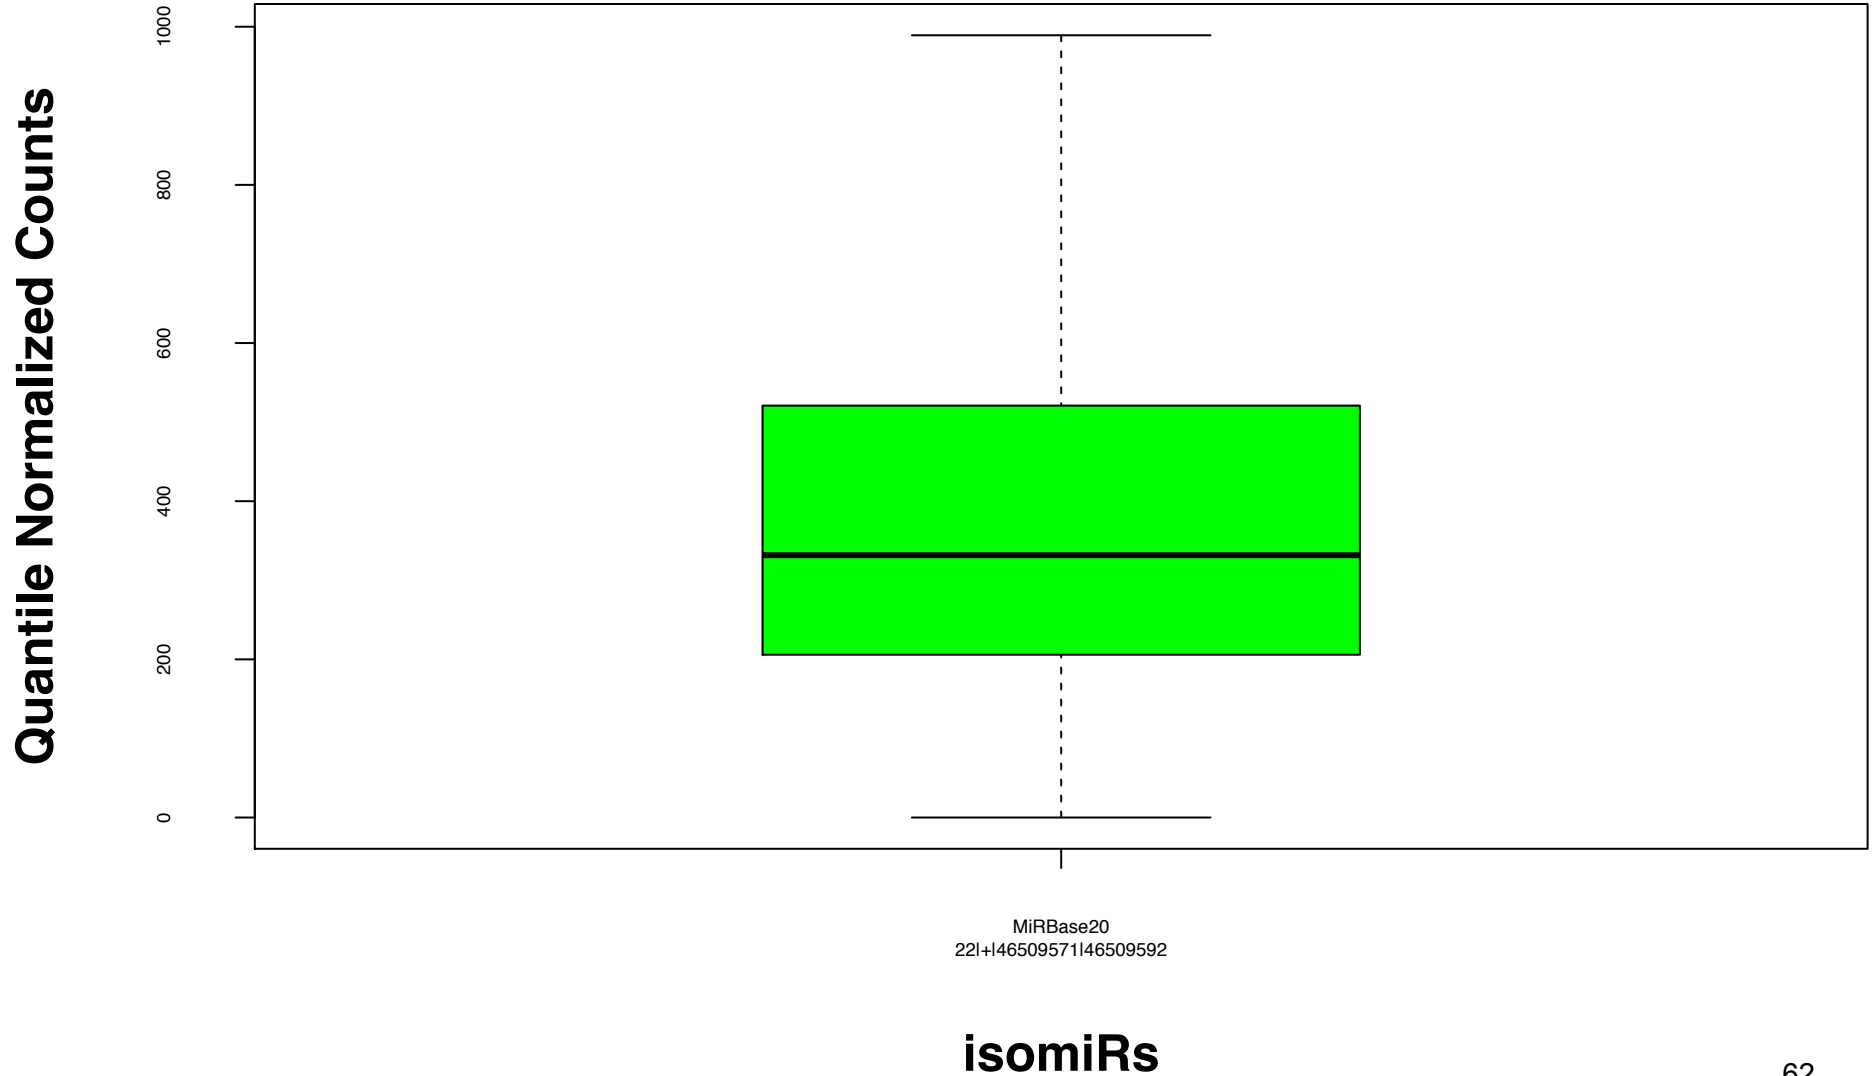

# MIMAT0031177=hsa-miR-7974=MI0025750

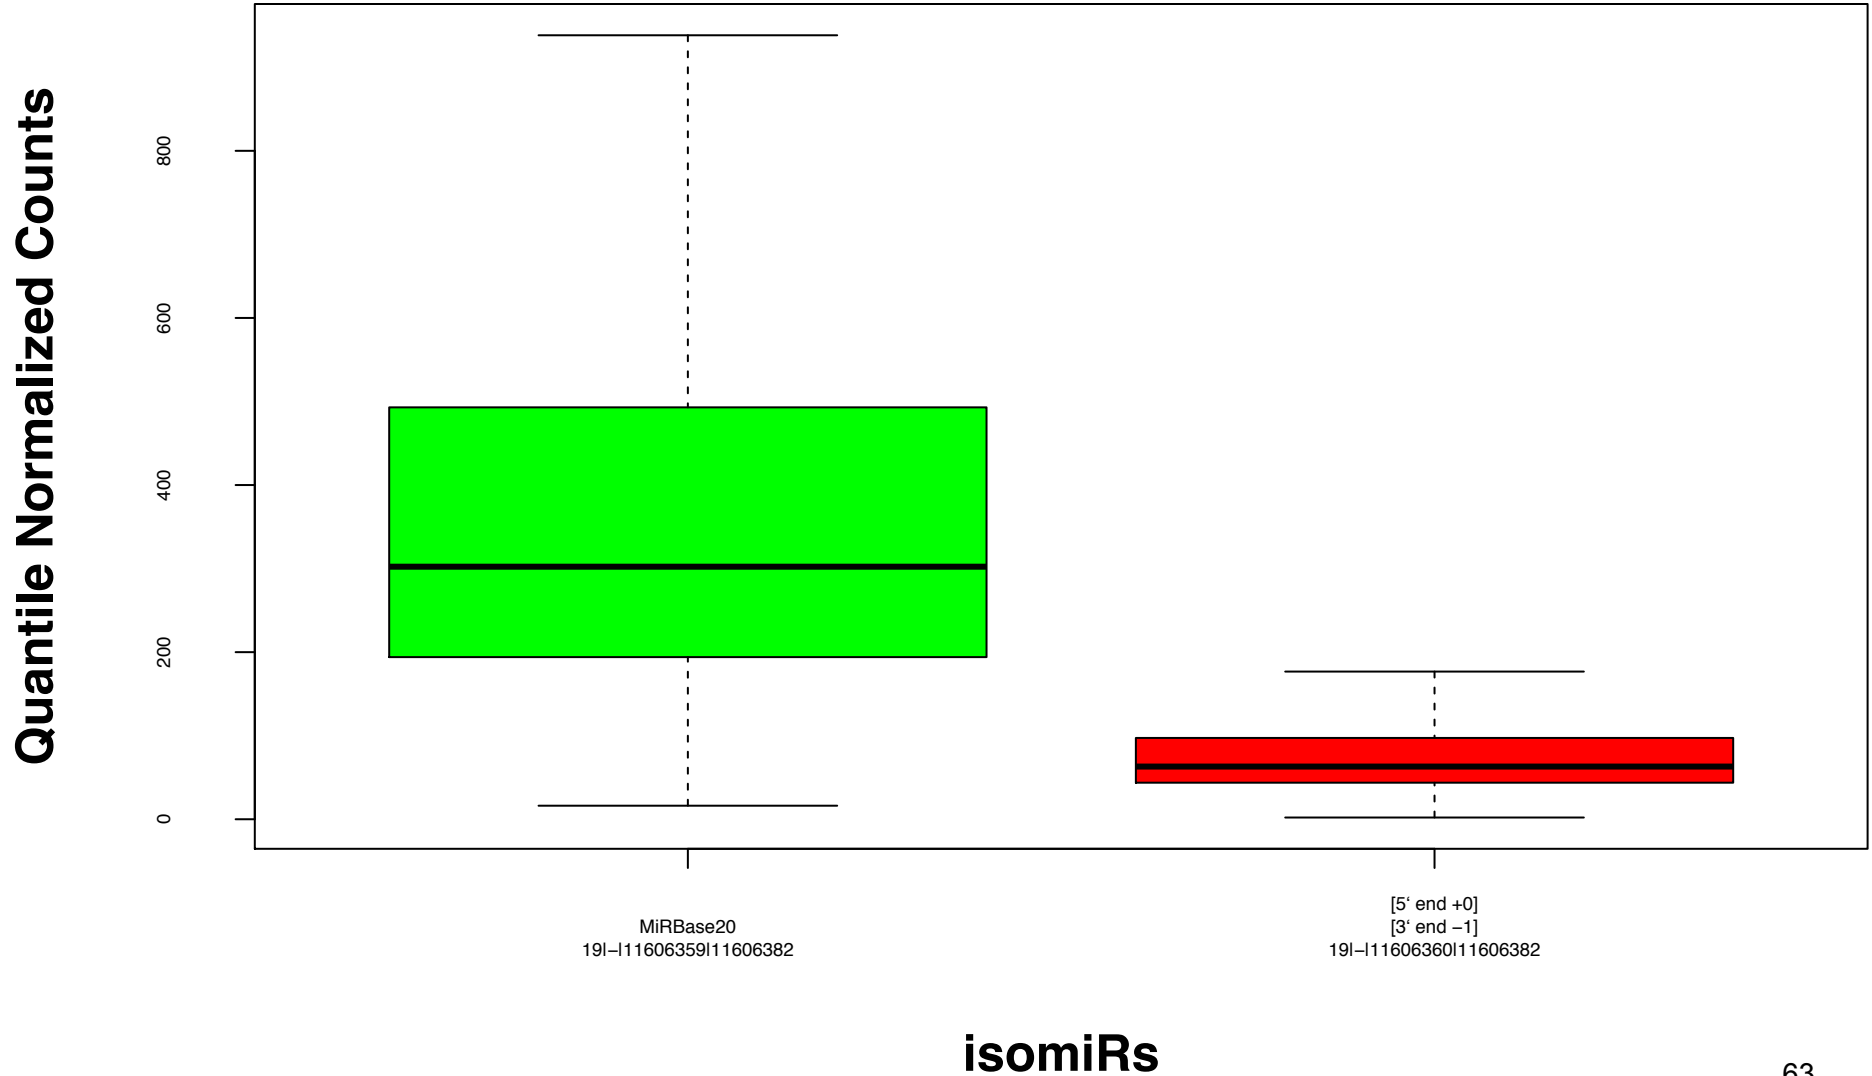



# MIMAT0000071=hsa-miR-17-3p=MI0000071

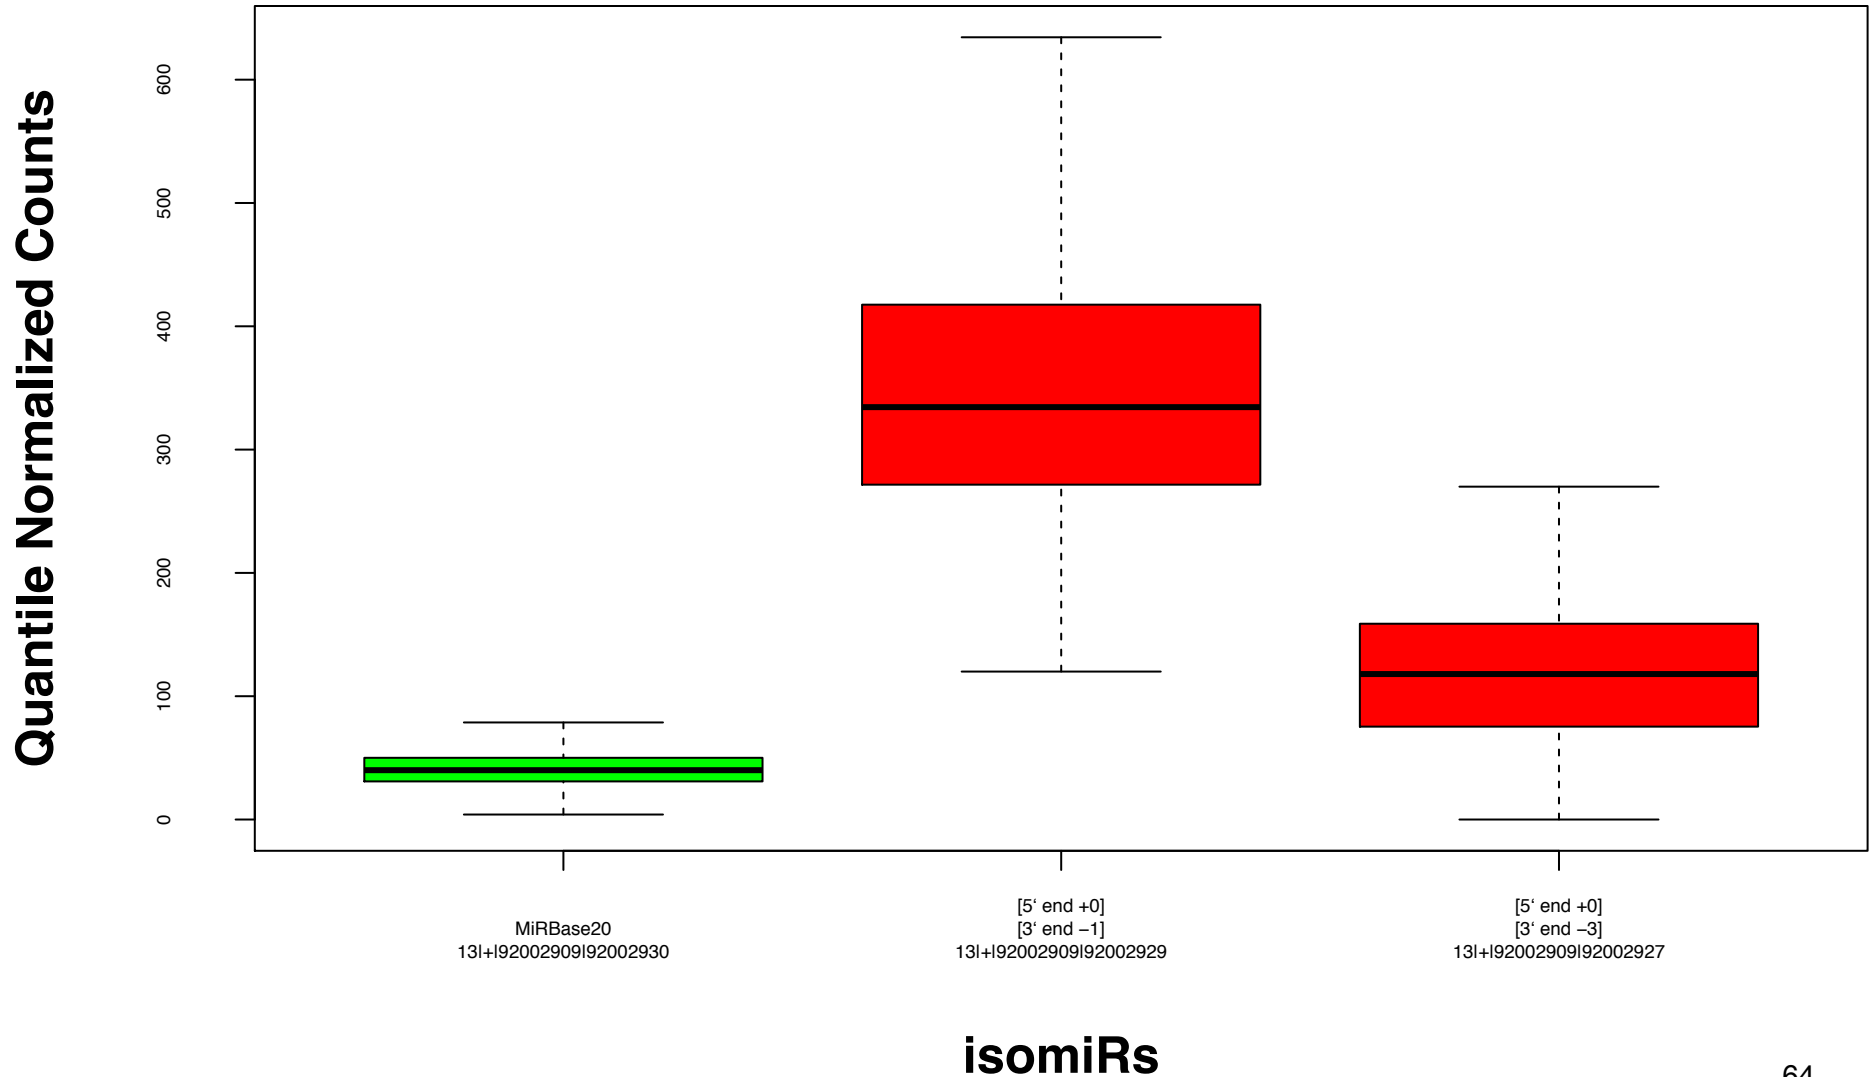

# MIMAT0000078=hsa-miR-23a-3p=MI0000079

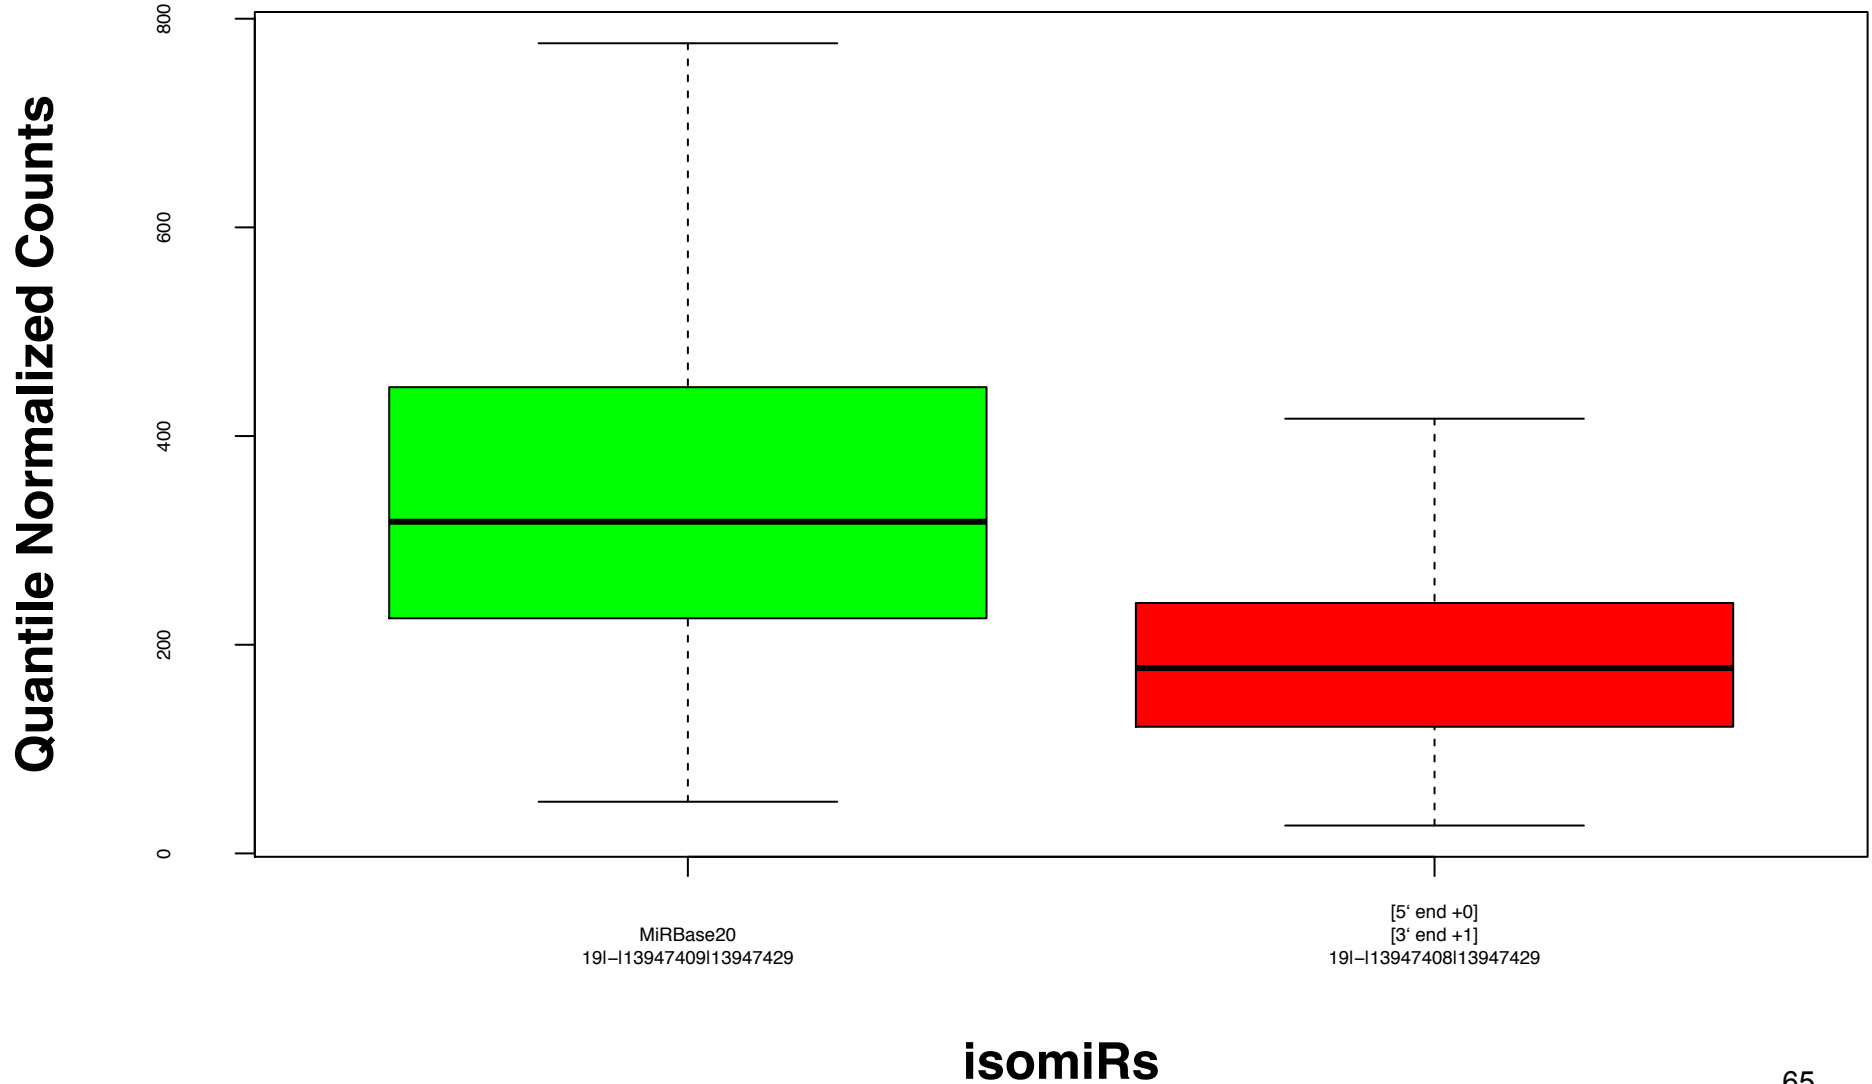

# MIMAT0022727=hsa-miR-1307-5p=MI0006444

Quantile Normalized Counts

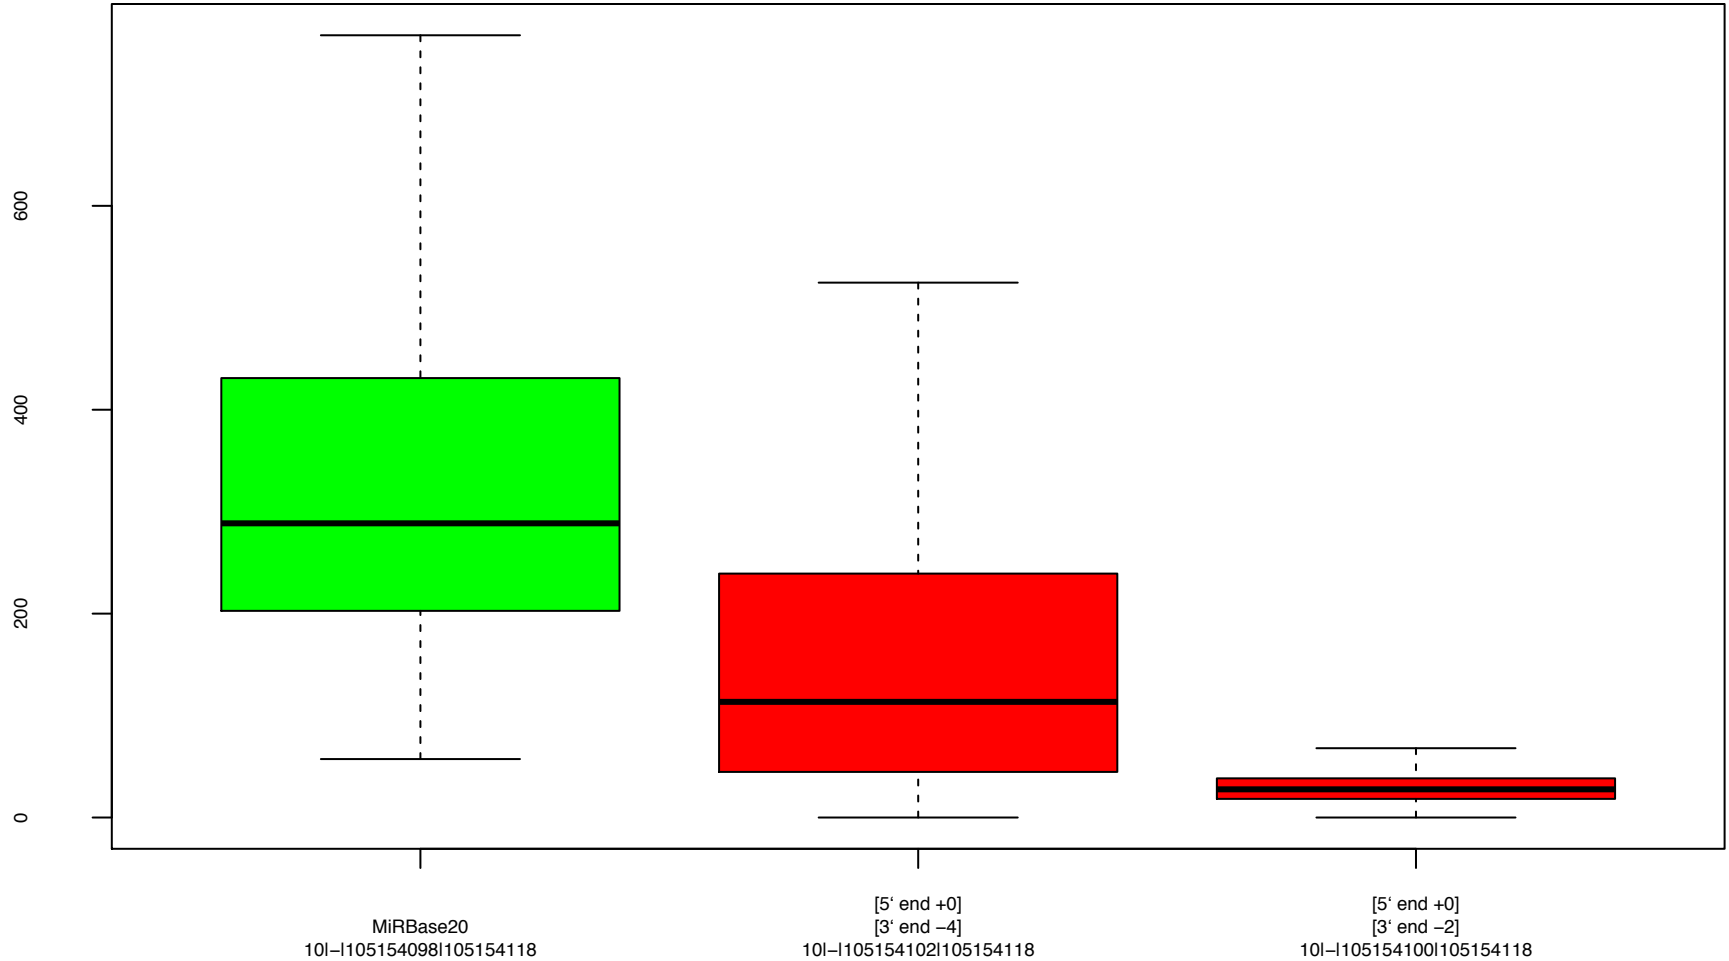

isomiRs

# MIMAT0026475=hsa-miR-210-5p=MI0000286

Quantile Normalized Counts

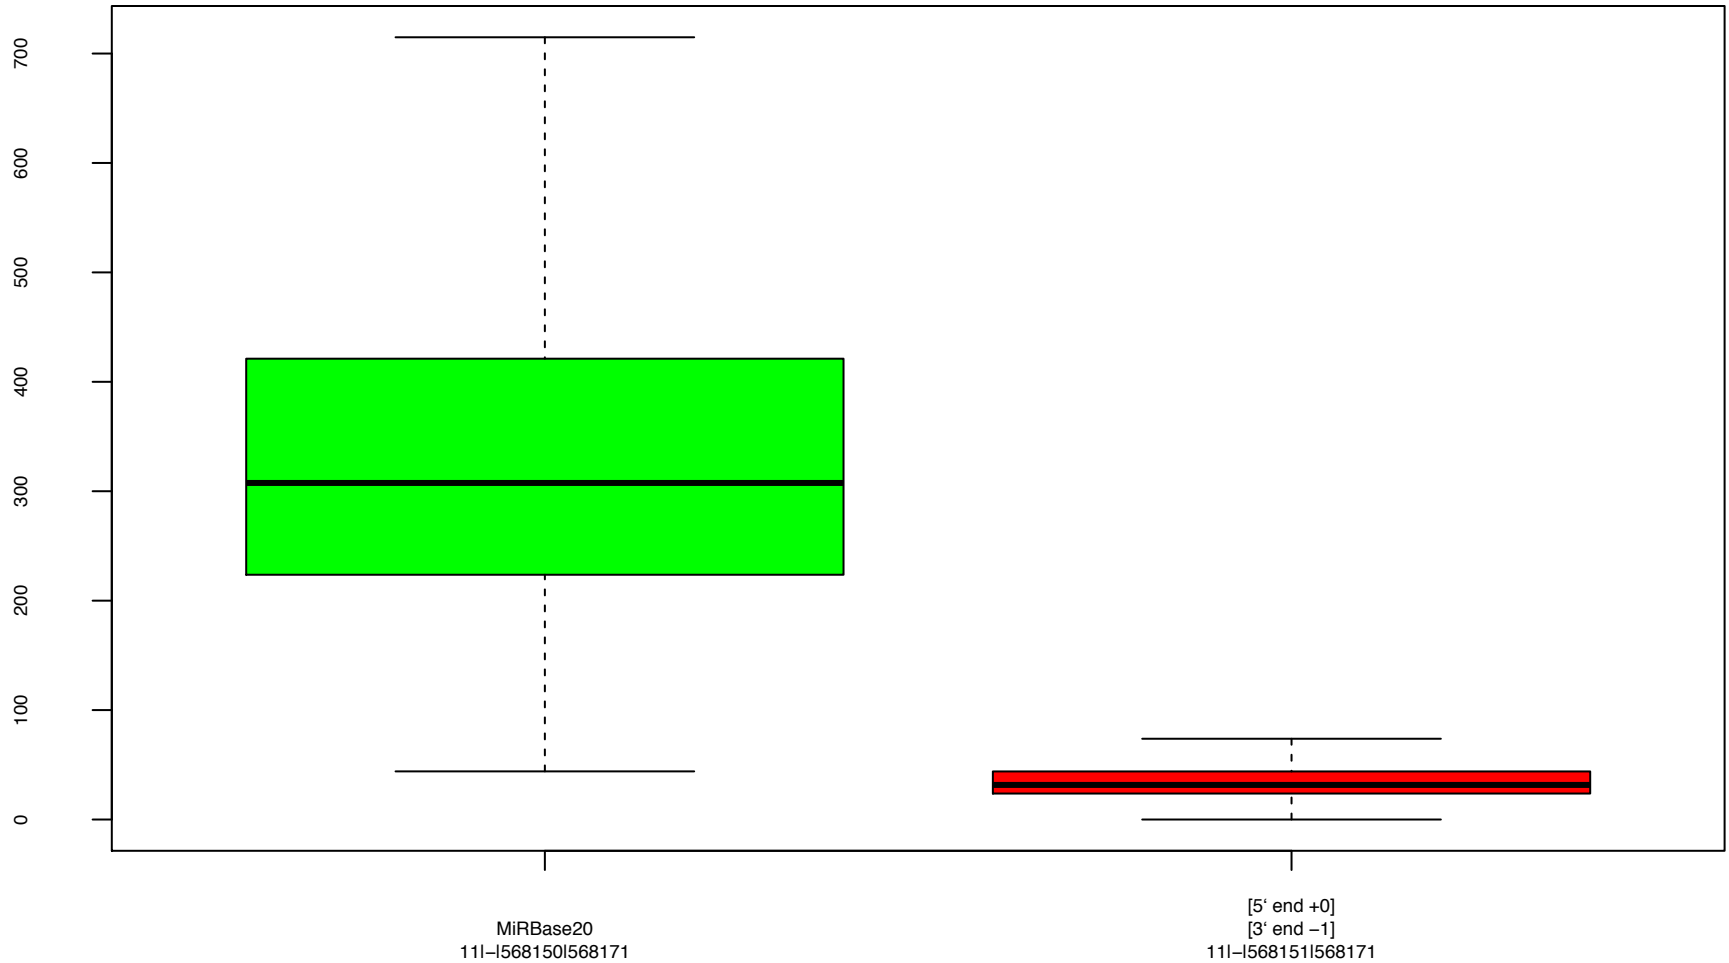

isomiRs

# MIMAT0000092\_1=hsa-miR-92a-3p=MI0000094

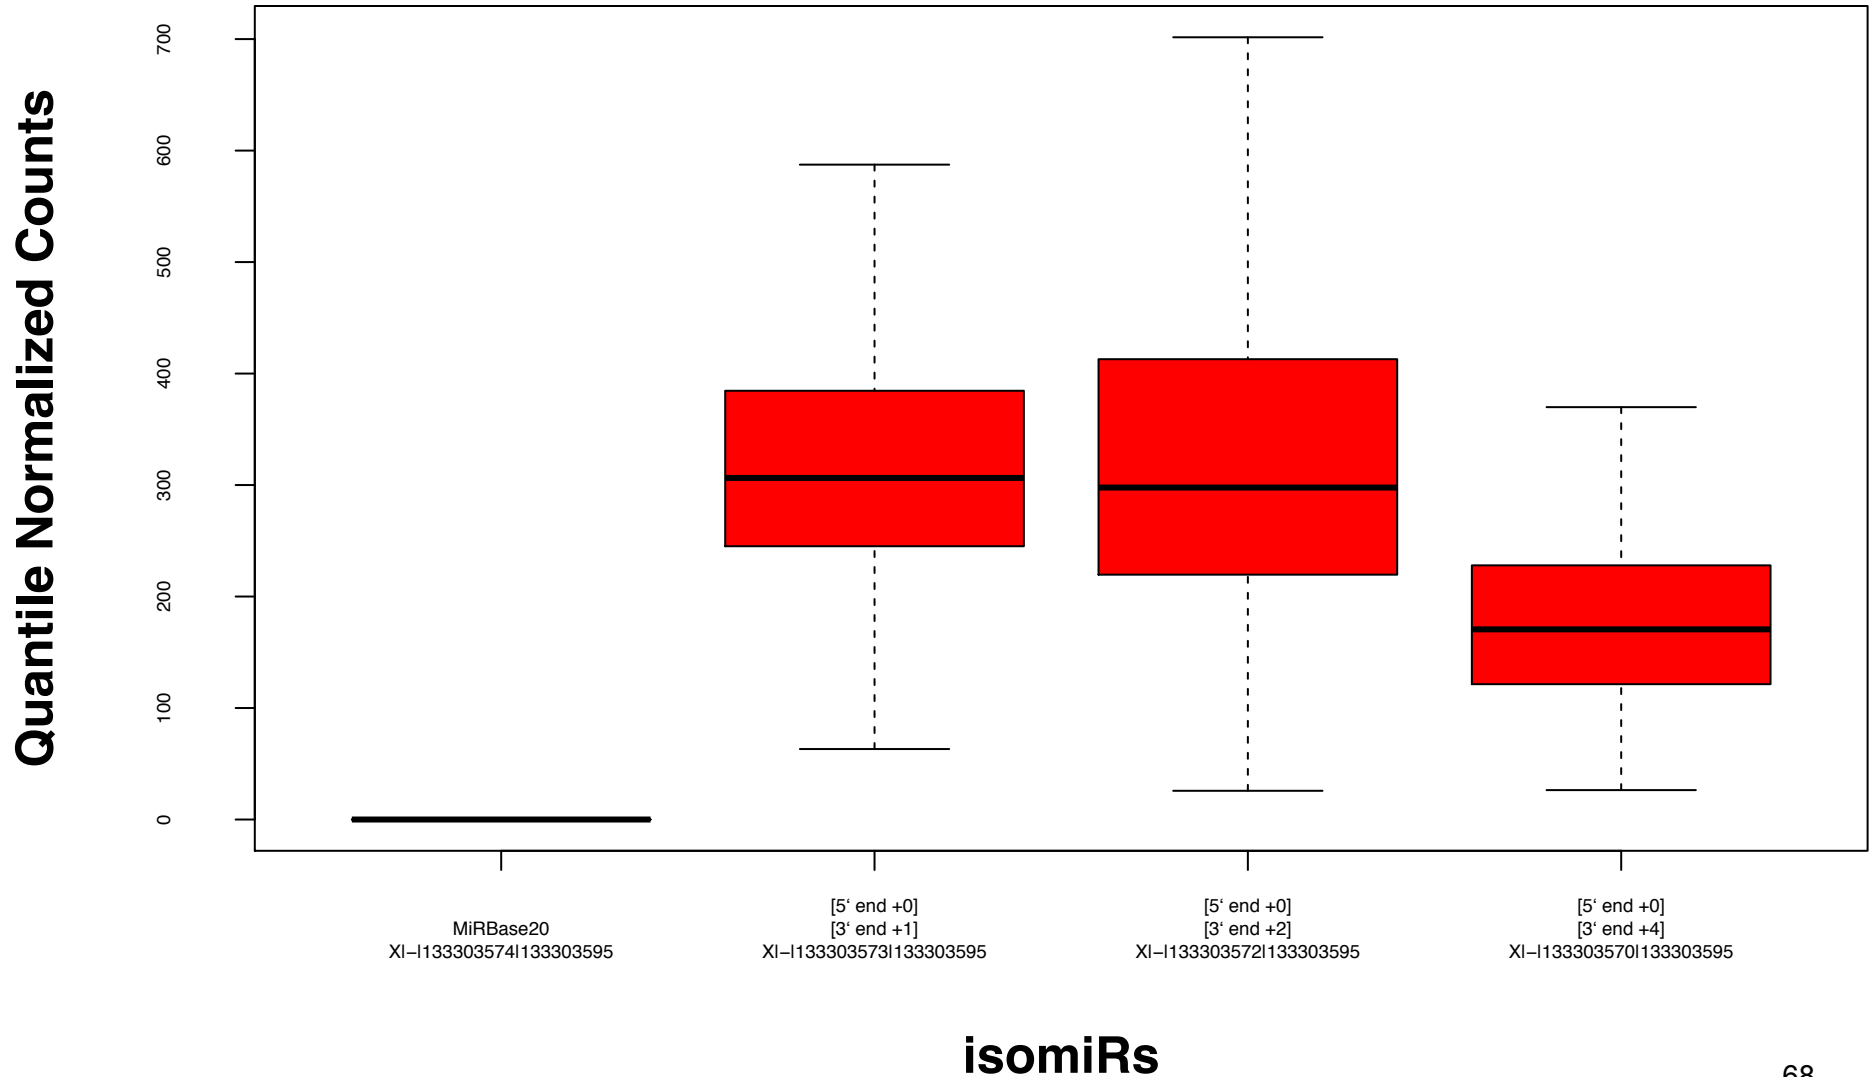

# MIMAT0002888=hsa-miR-532-5p=MI0003205

Quantile Normalized Counts

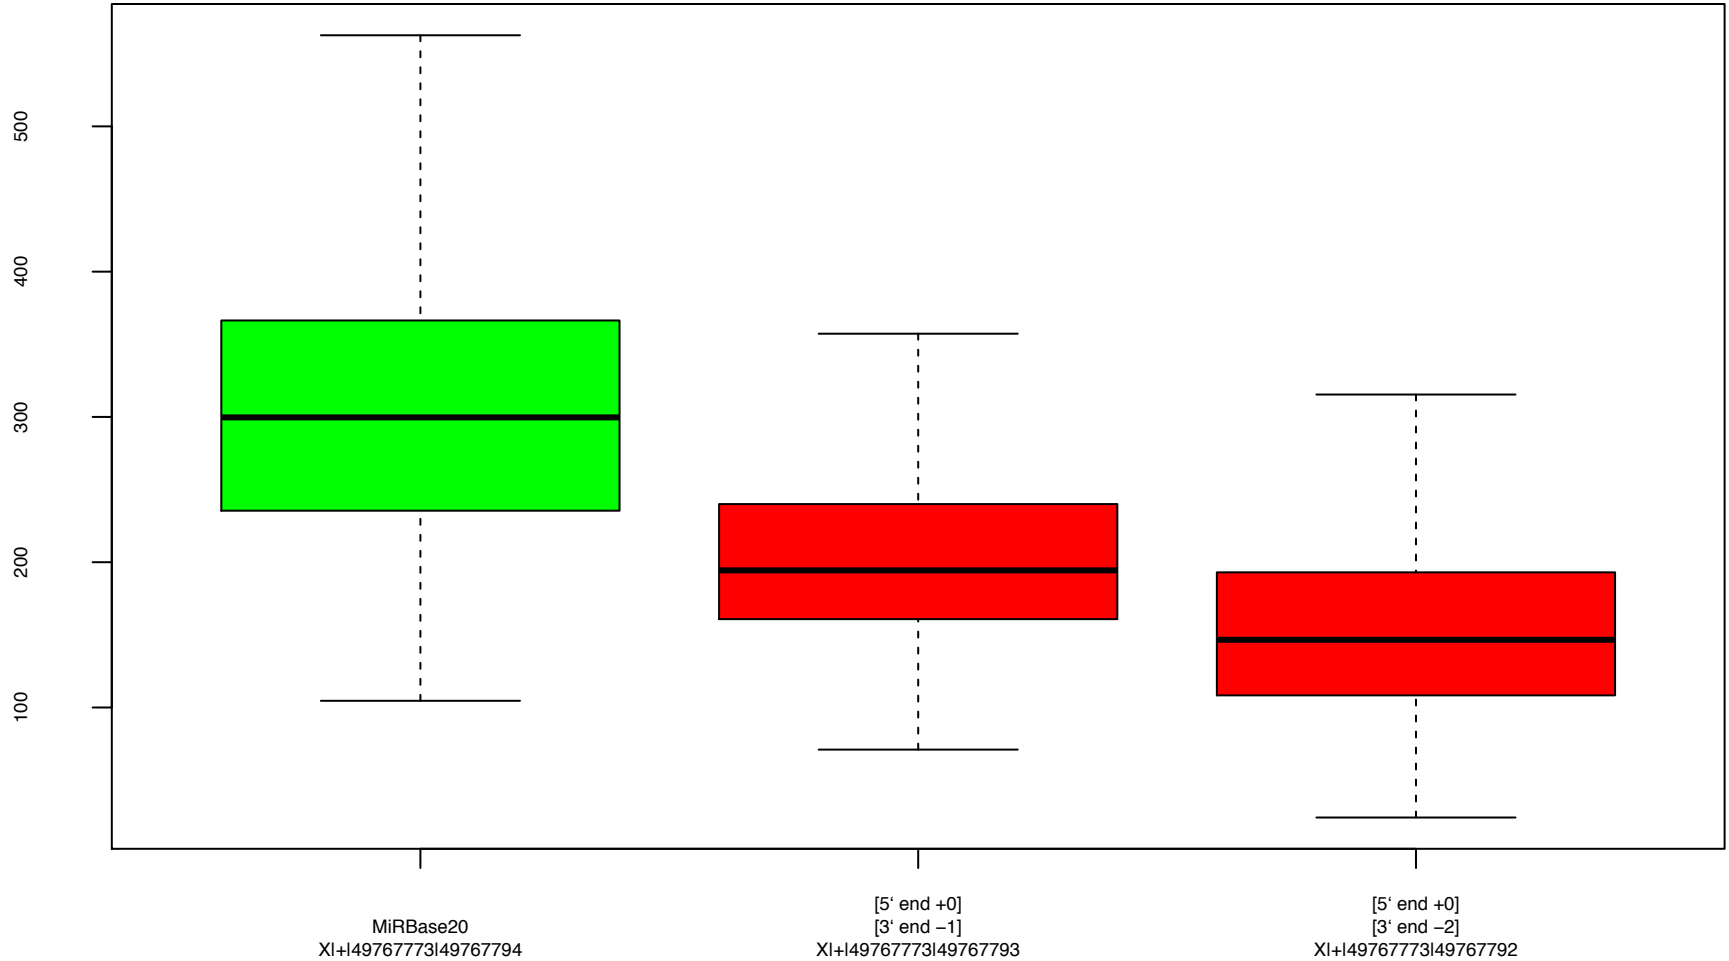

isomiRs

# MIMAT0000227=hsa-miR-197-3p=MI0000239

Quantile Normalized Counts

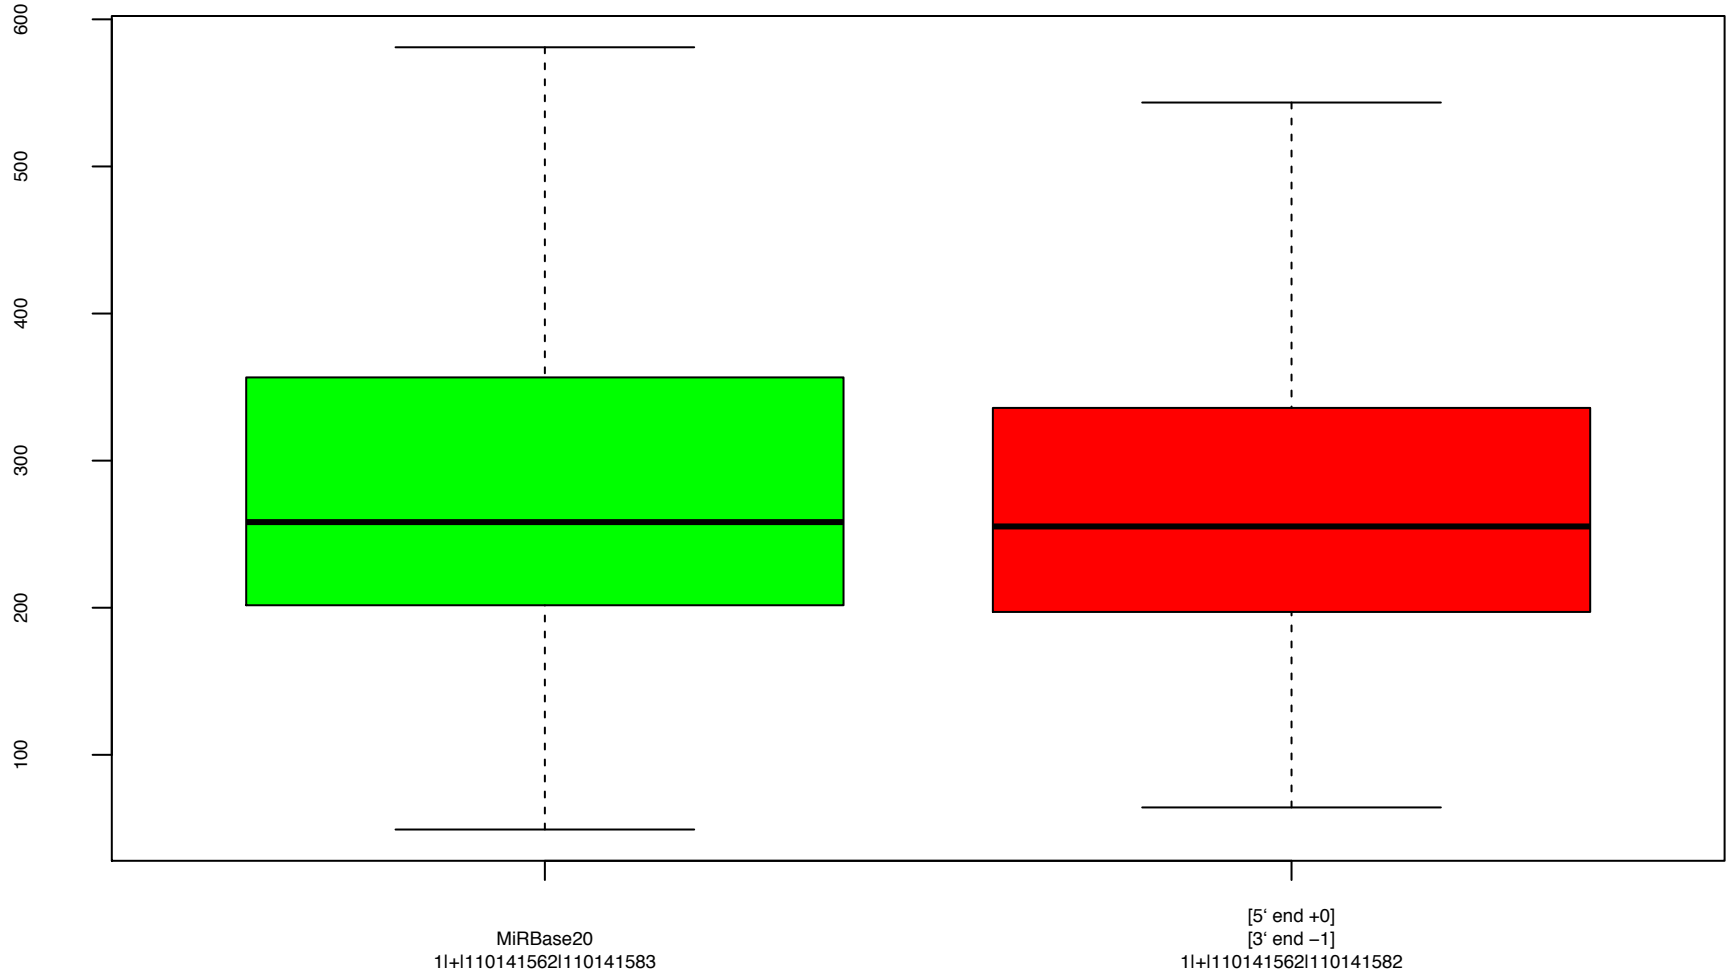

isomiRs

# MIMAT0000068=hsa-miR-15a-5p=MI0000069

Quantile Normalized Counts

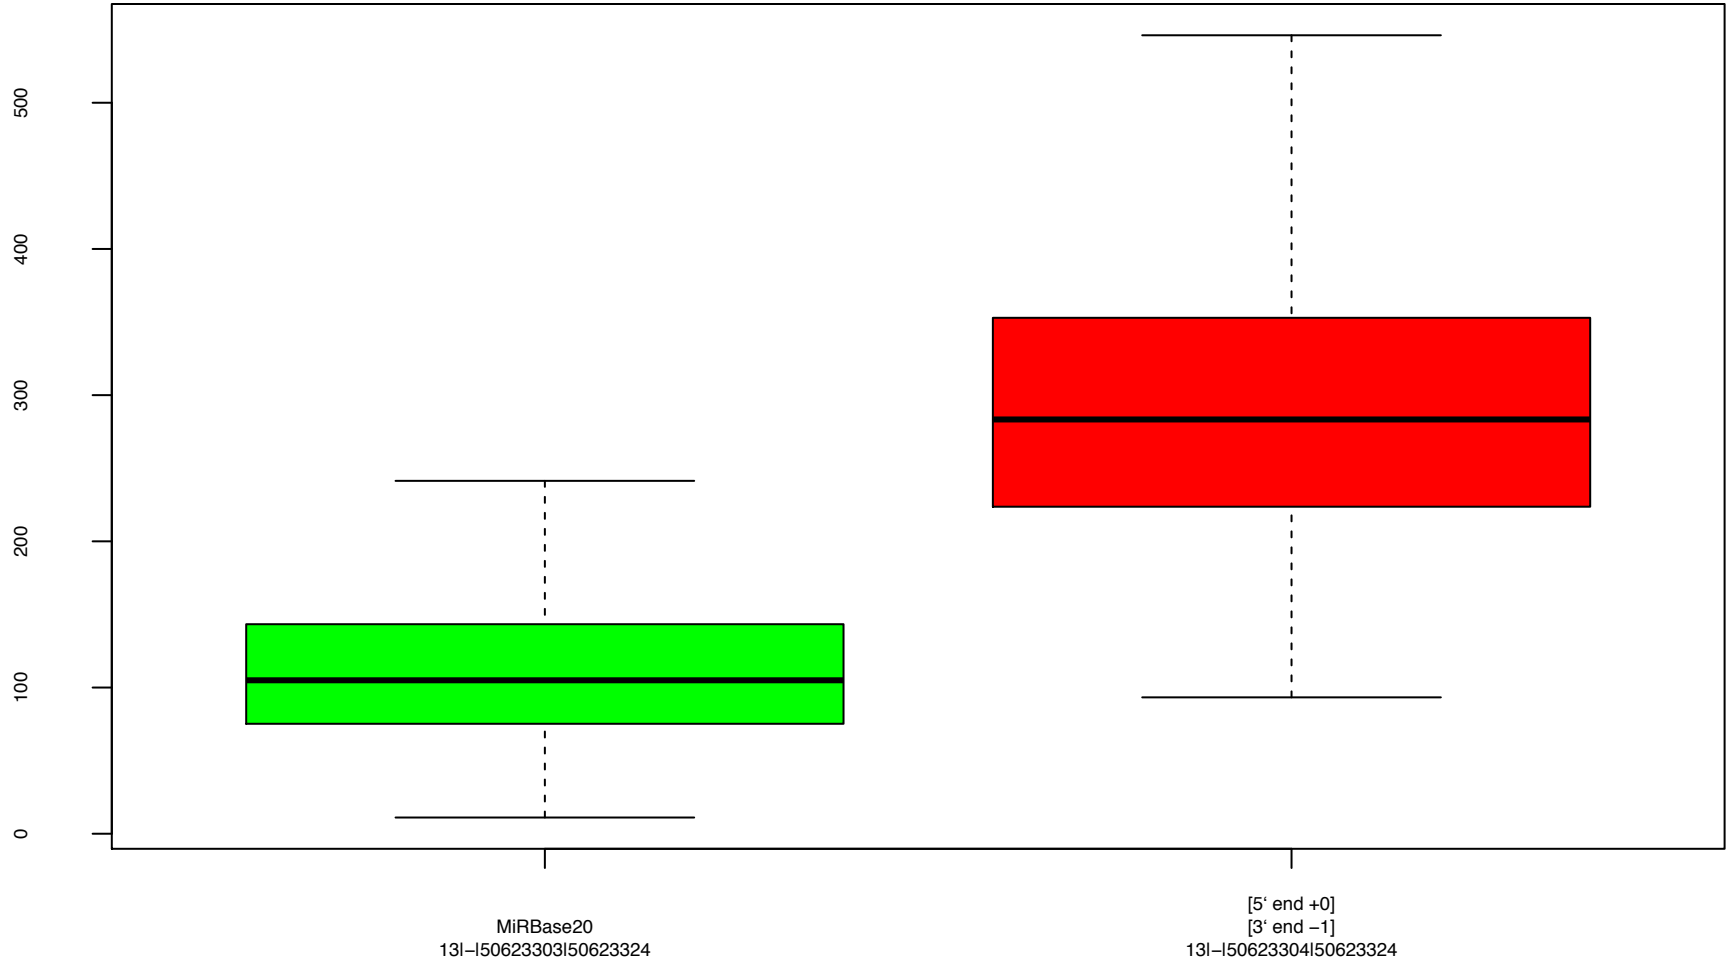

isomiRs



# MIMAT0000688=hsa-miR-301a-3p=MI0000745

Quantile Normalized Counts

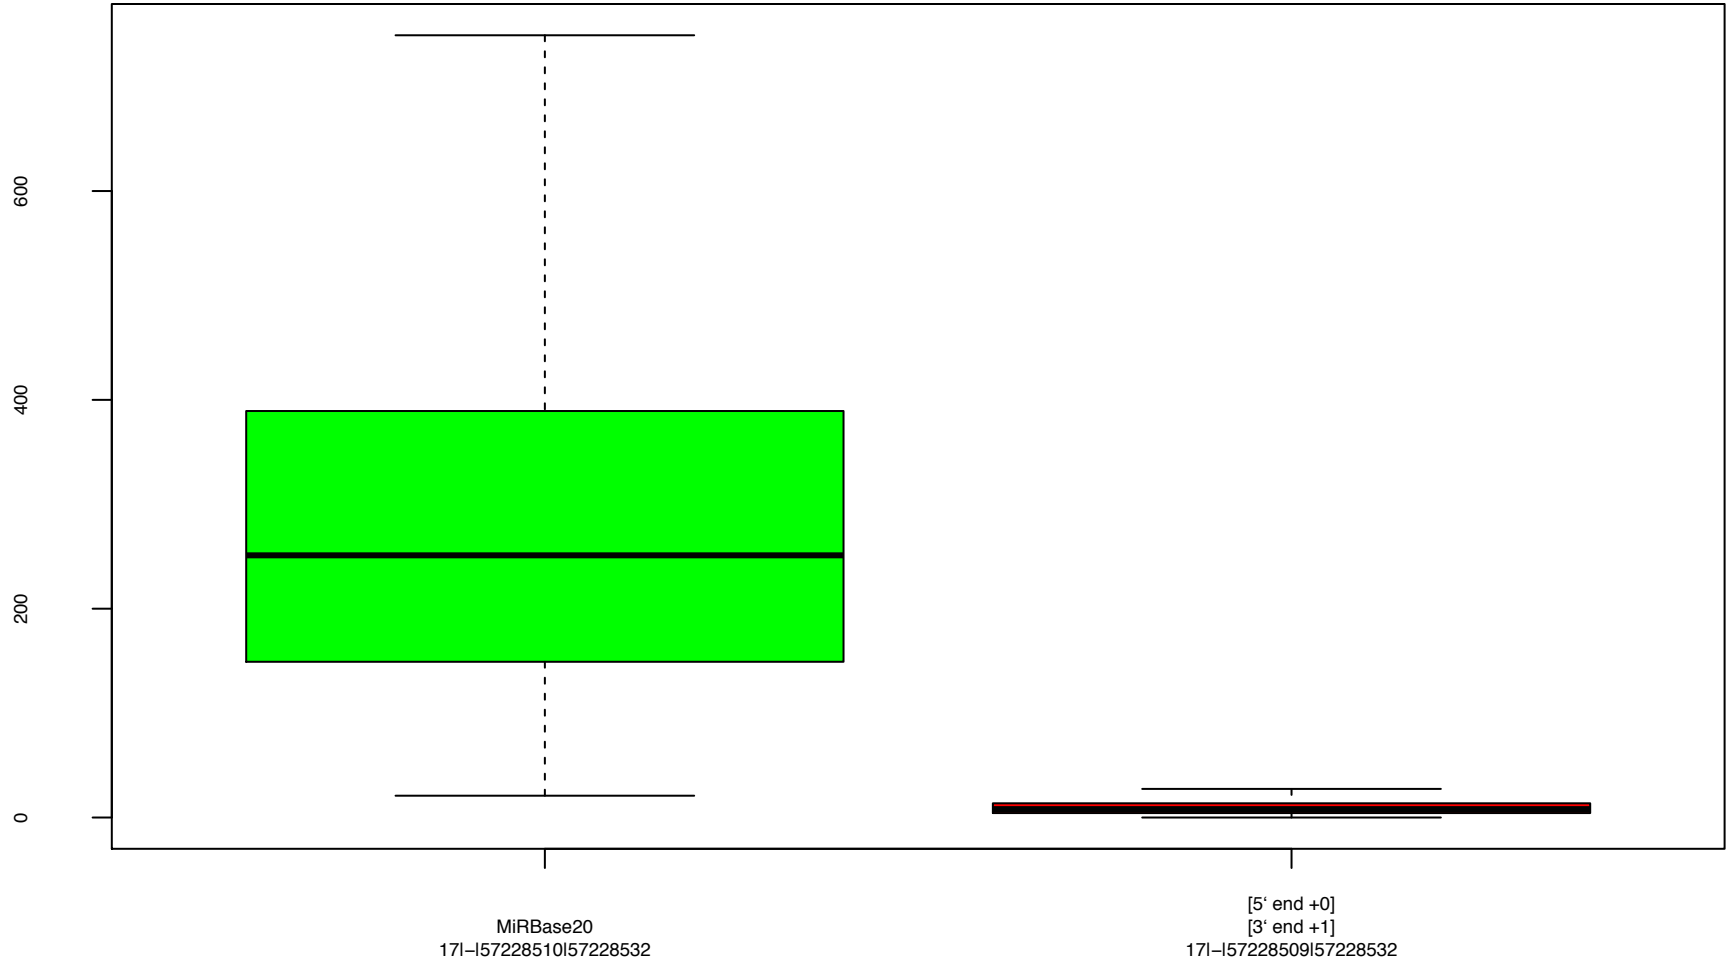

isomiRs

# MIMAT0004819=hsa-miR-671-3p=MI0003760

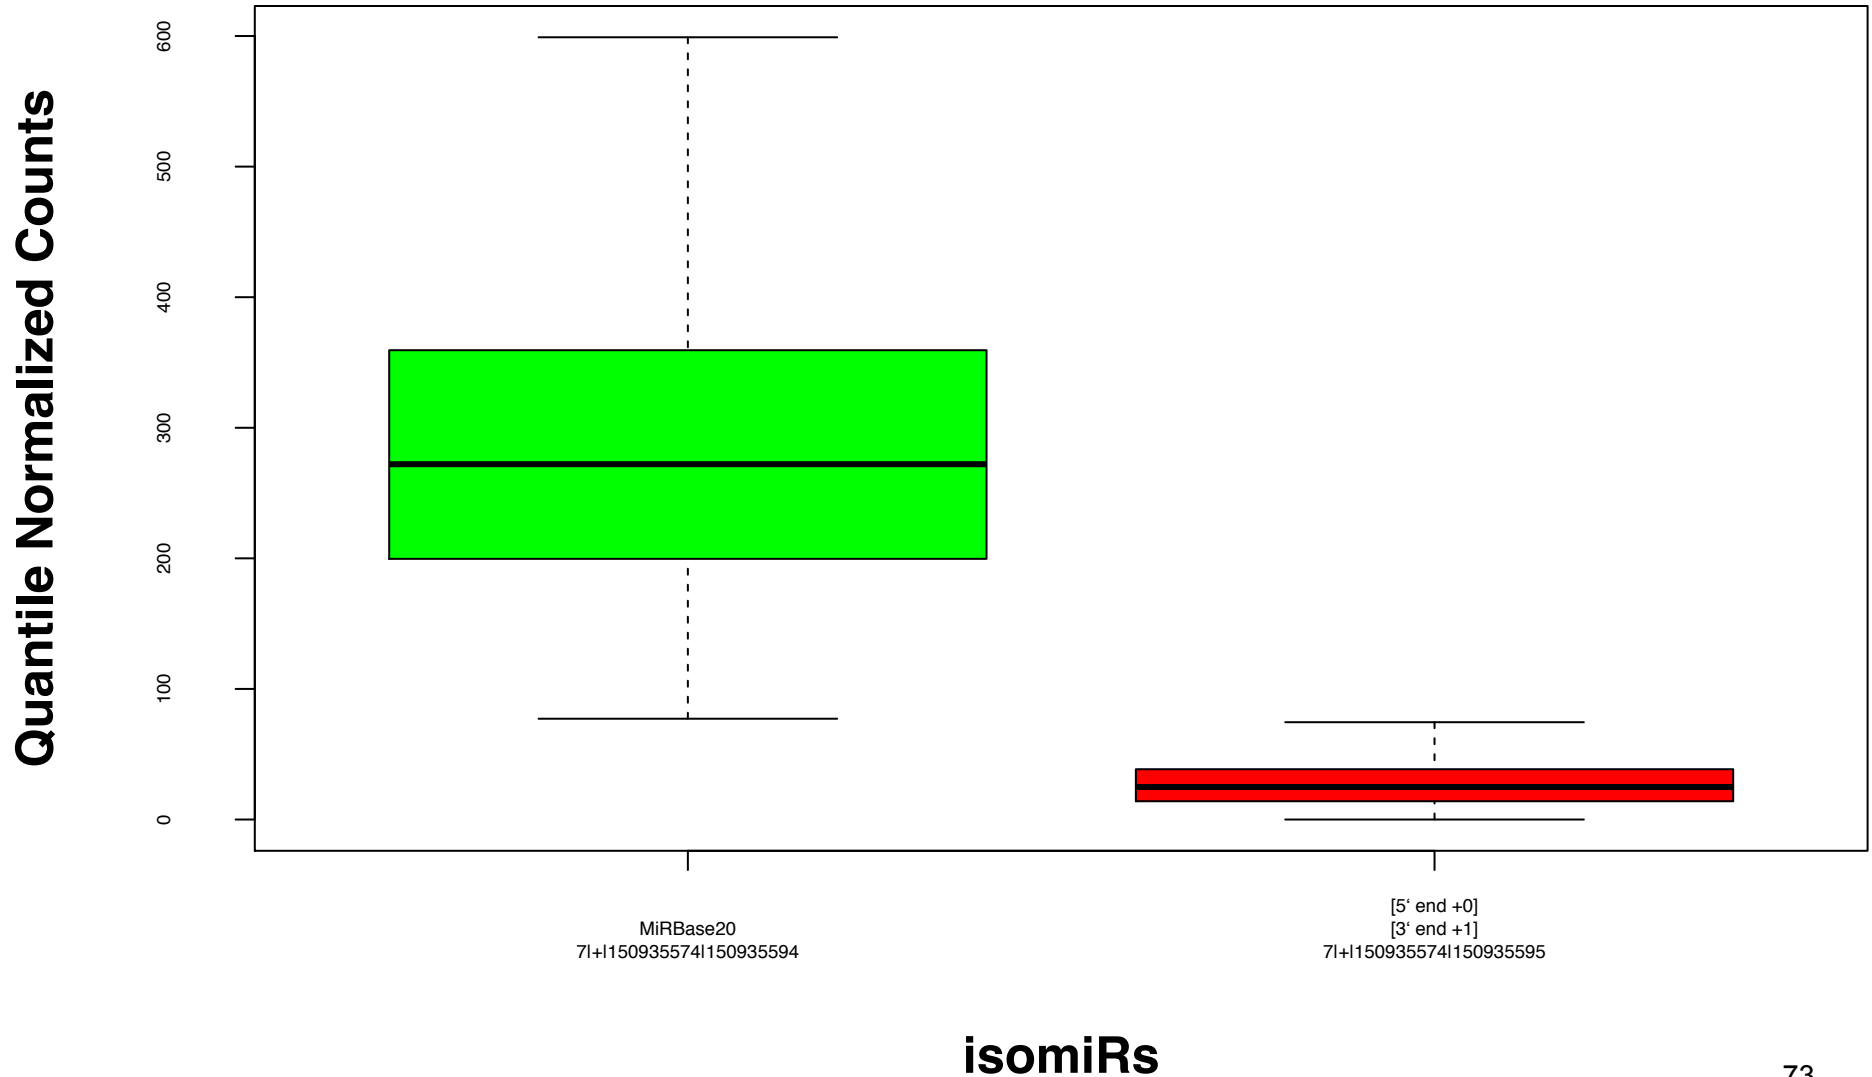

# MIMAT0000703=hsa-miR-361-5p=MI0000760

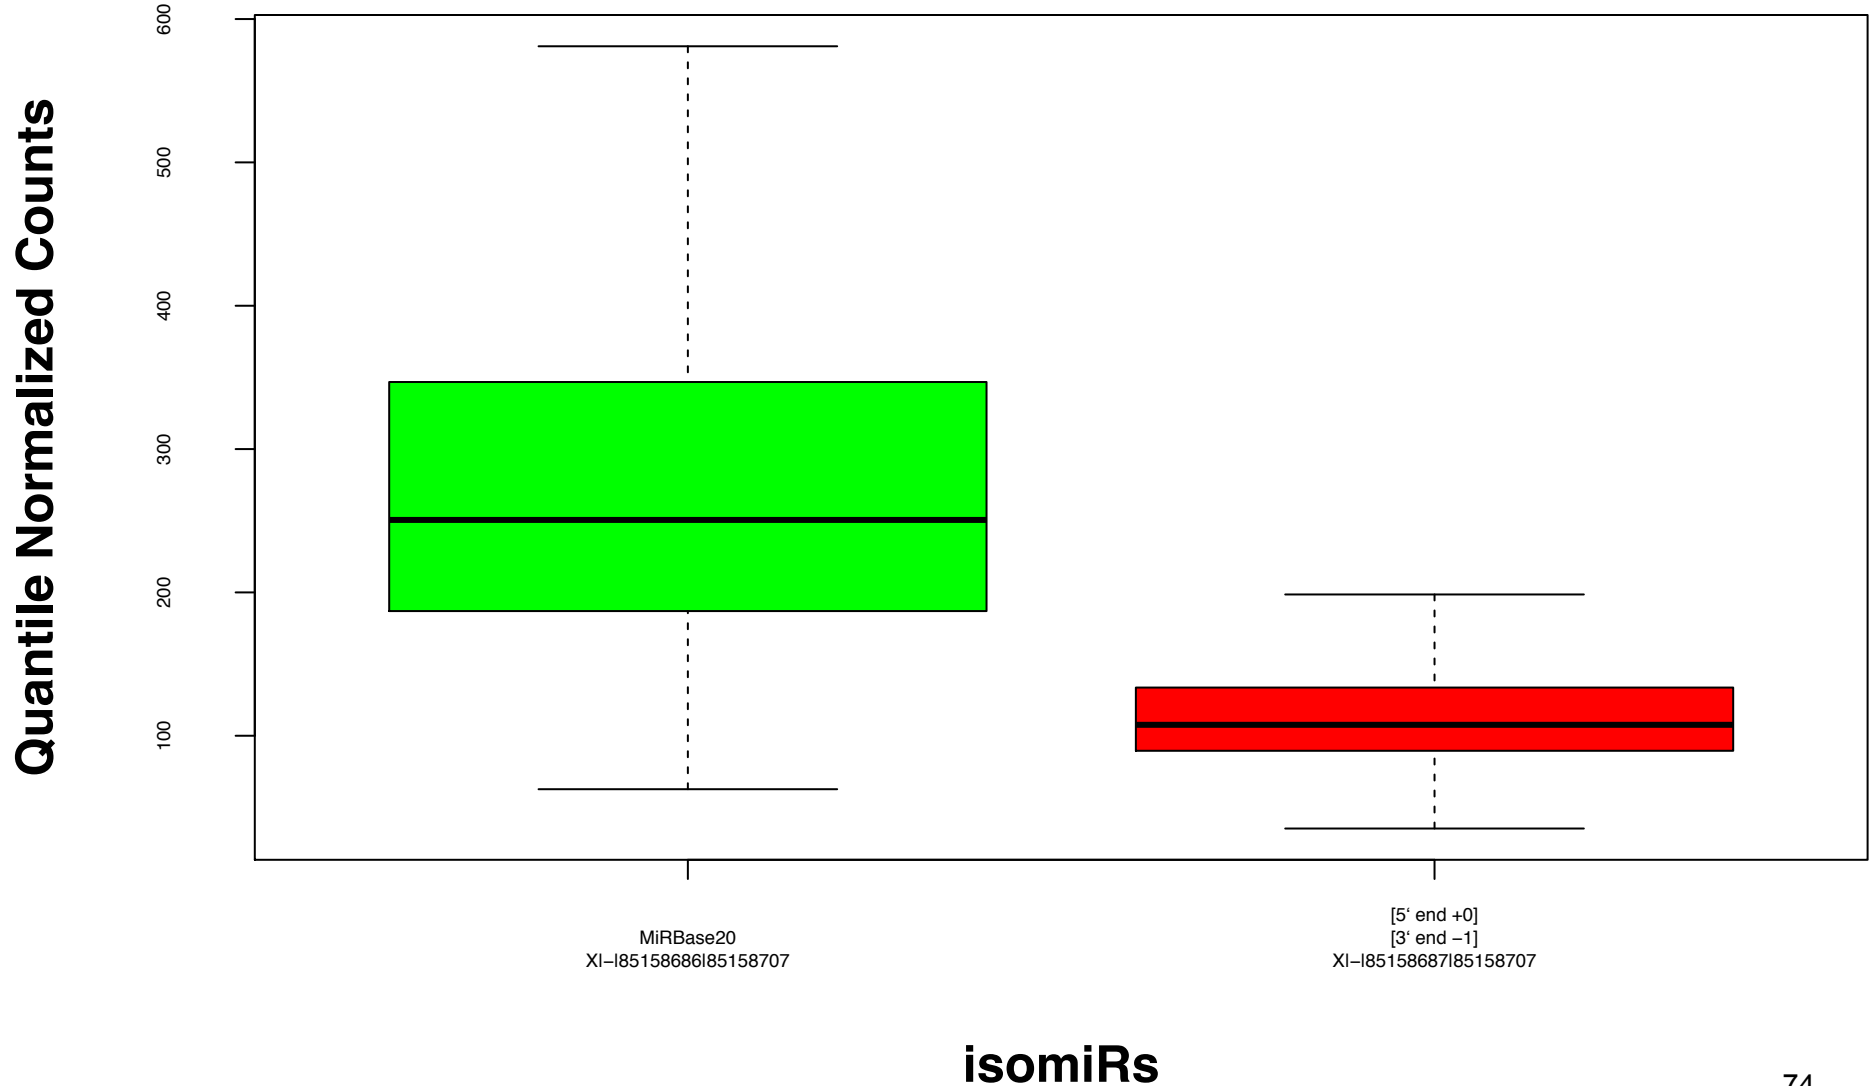

# MIMAT0004799=hsa-miR-589-5p=MI0003599

Quantile Normalized Counts

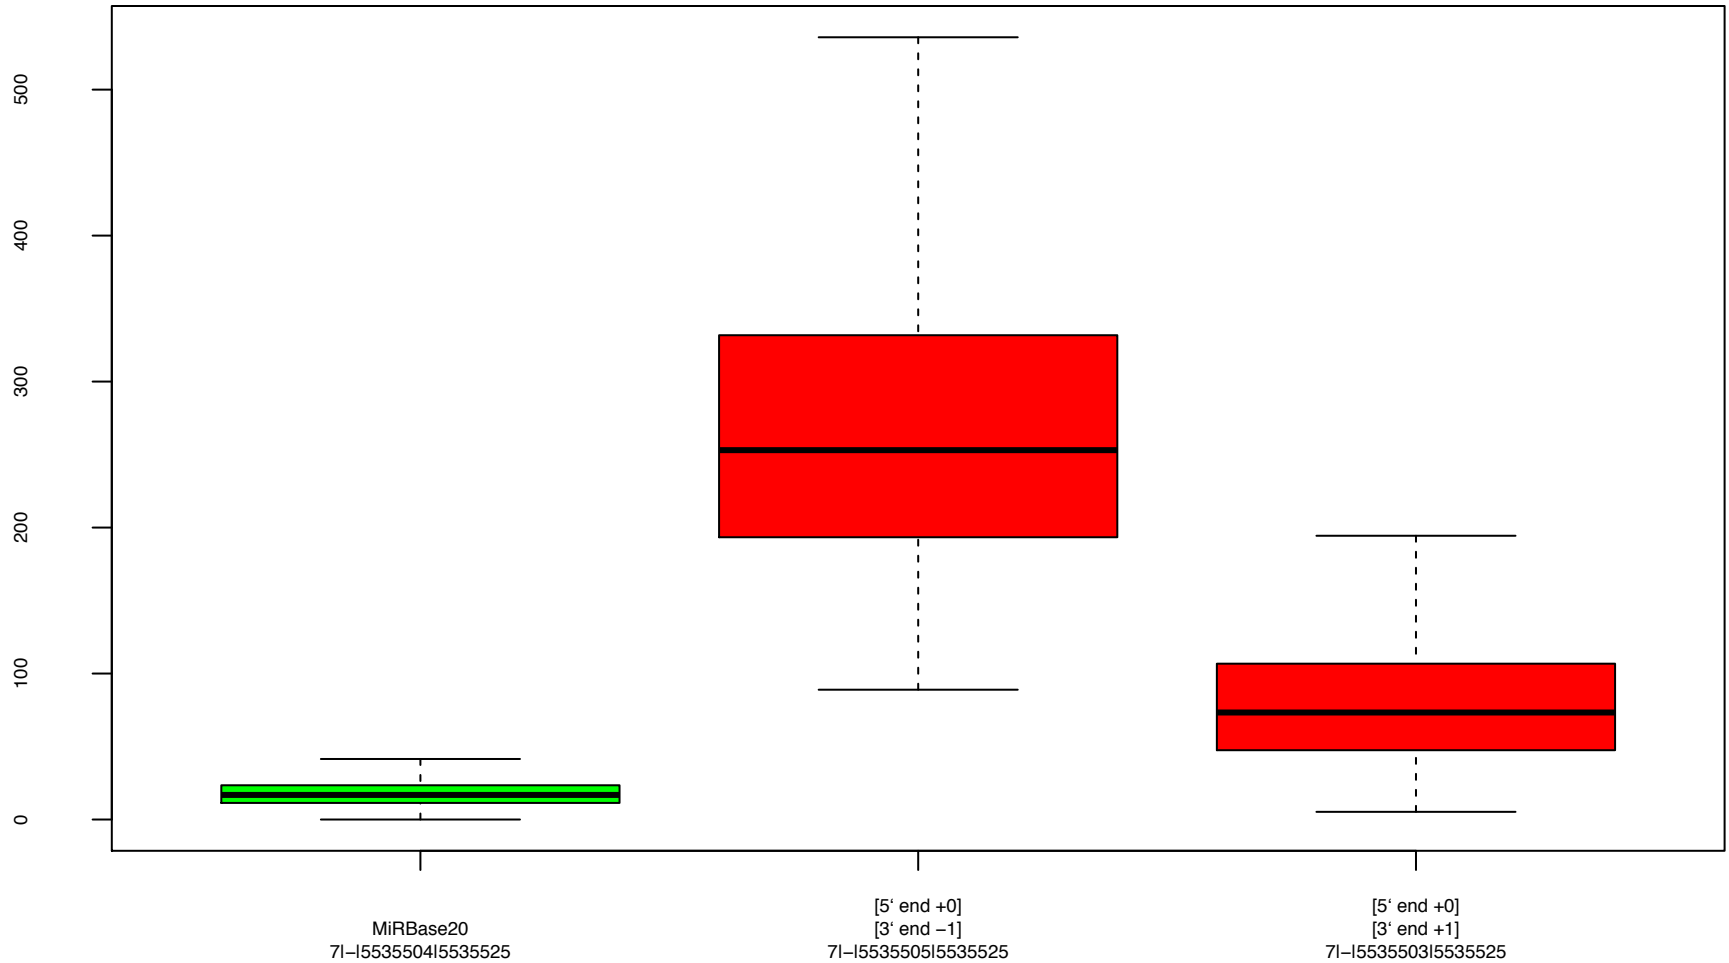

isomiRs

# MIMAT0001413=hsa-miR-20b-5p=MI0001519

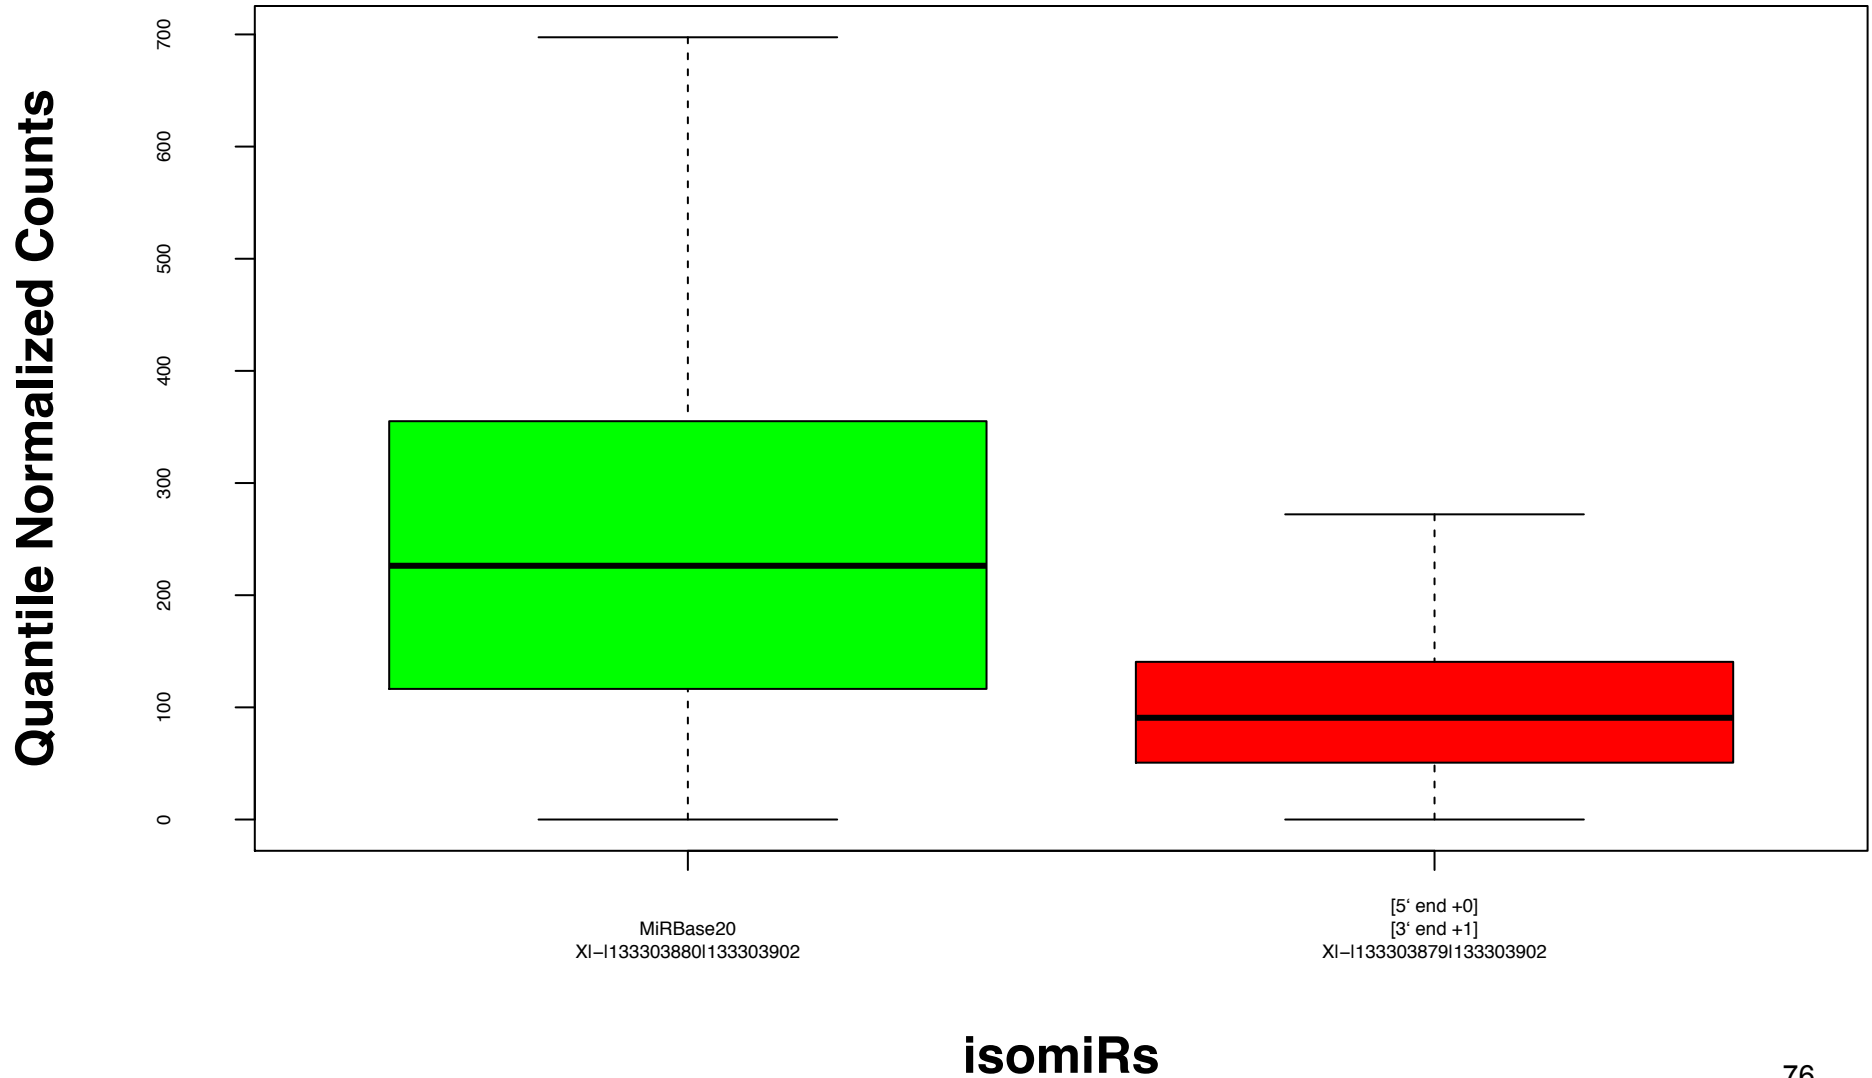

# MIMAT0000772=hsa-miR-345-5p=MI0000825

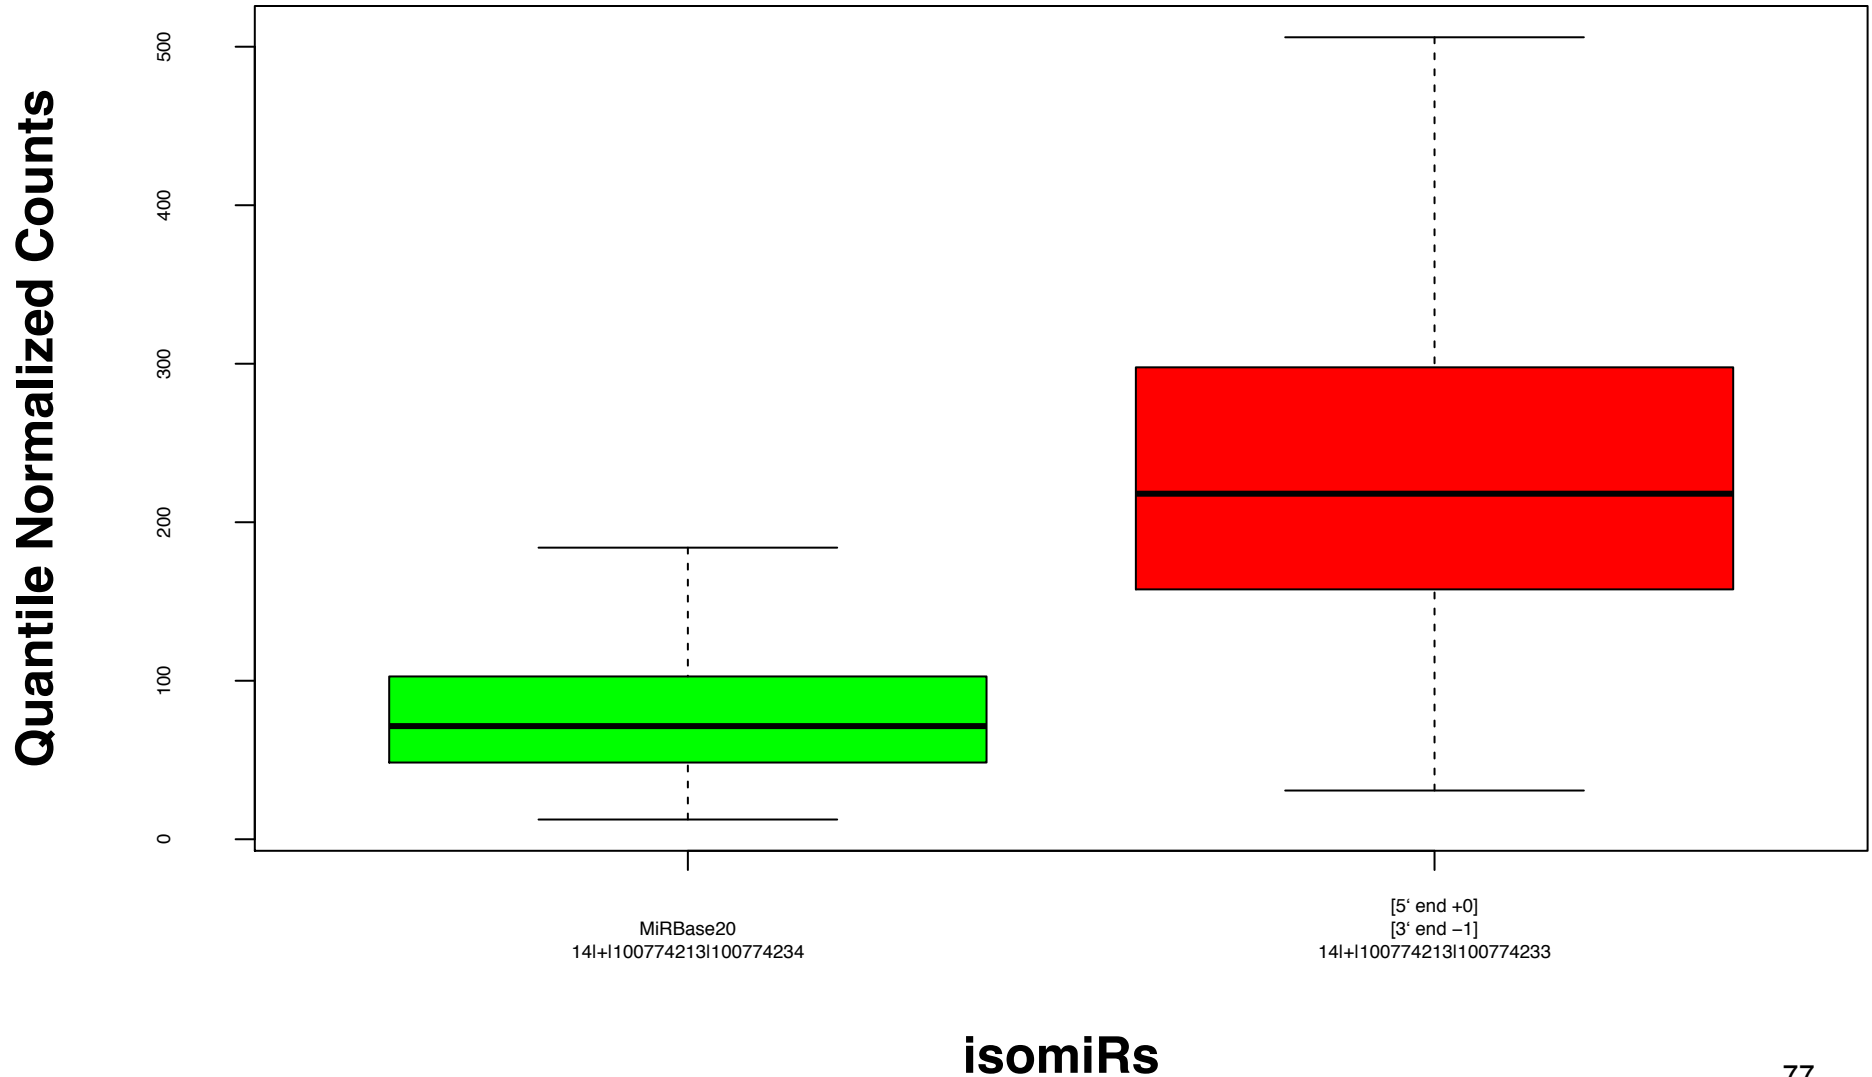

# MIMAT0003885=hsa-miR-454-3p=MI0003820

Quantile Normalized Counts

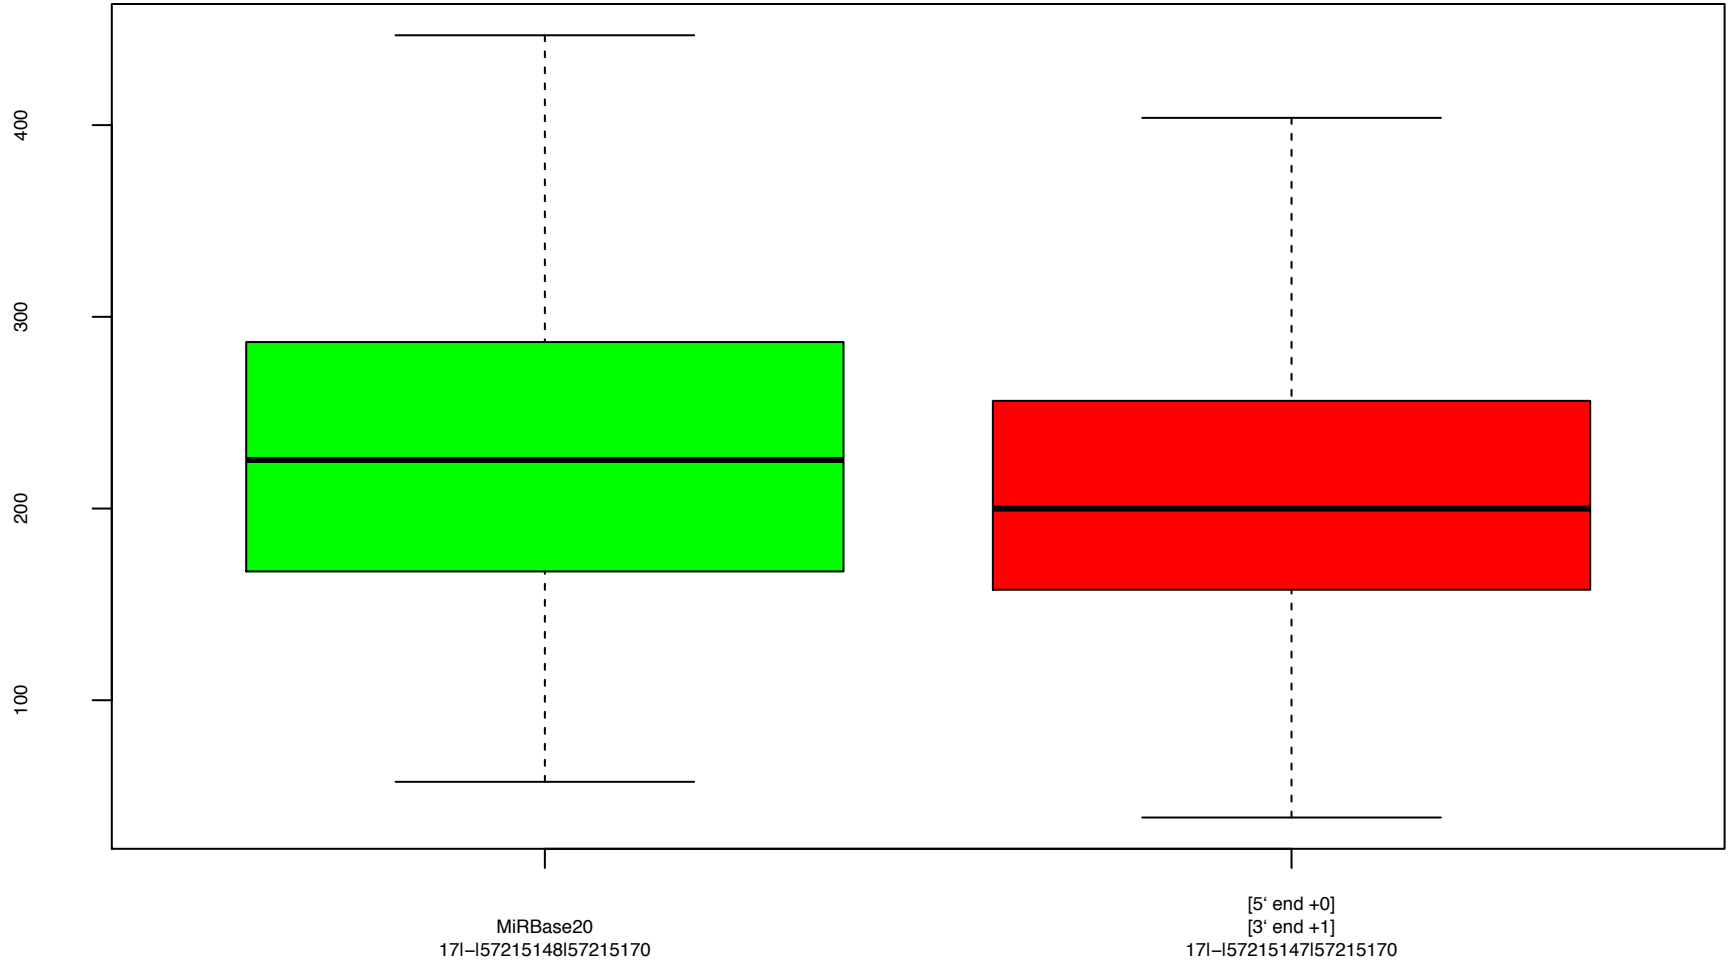

isomiRs

# MIMAT0000426=hsa-miR-132-3p=MI0000449

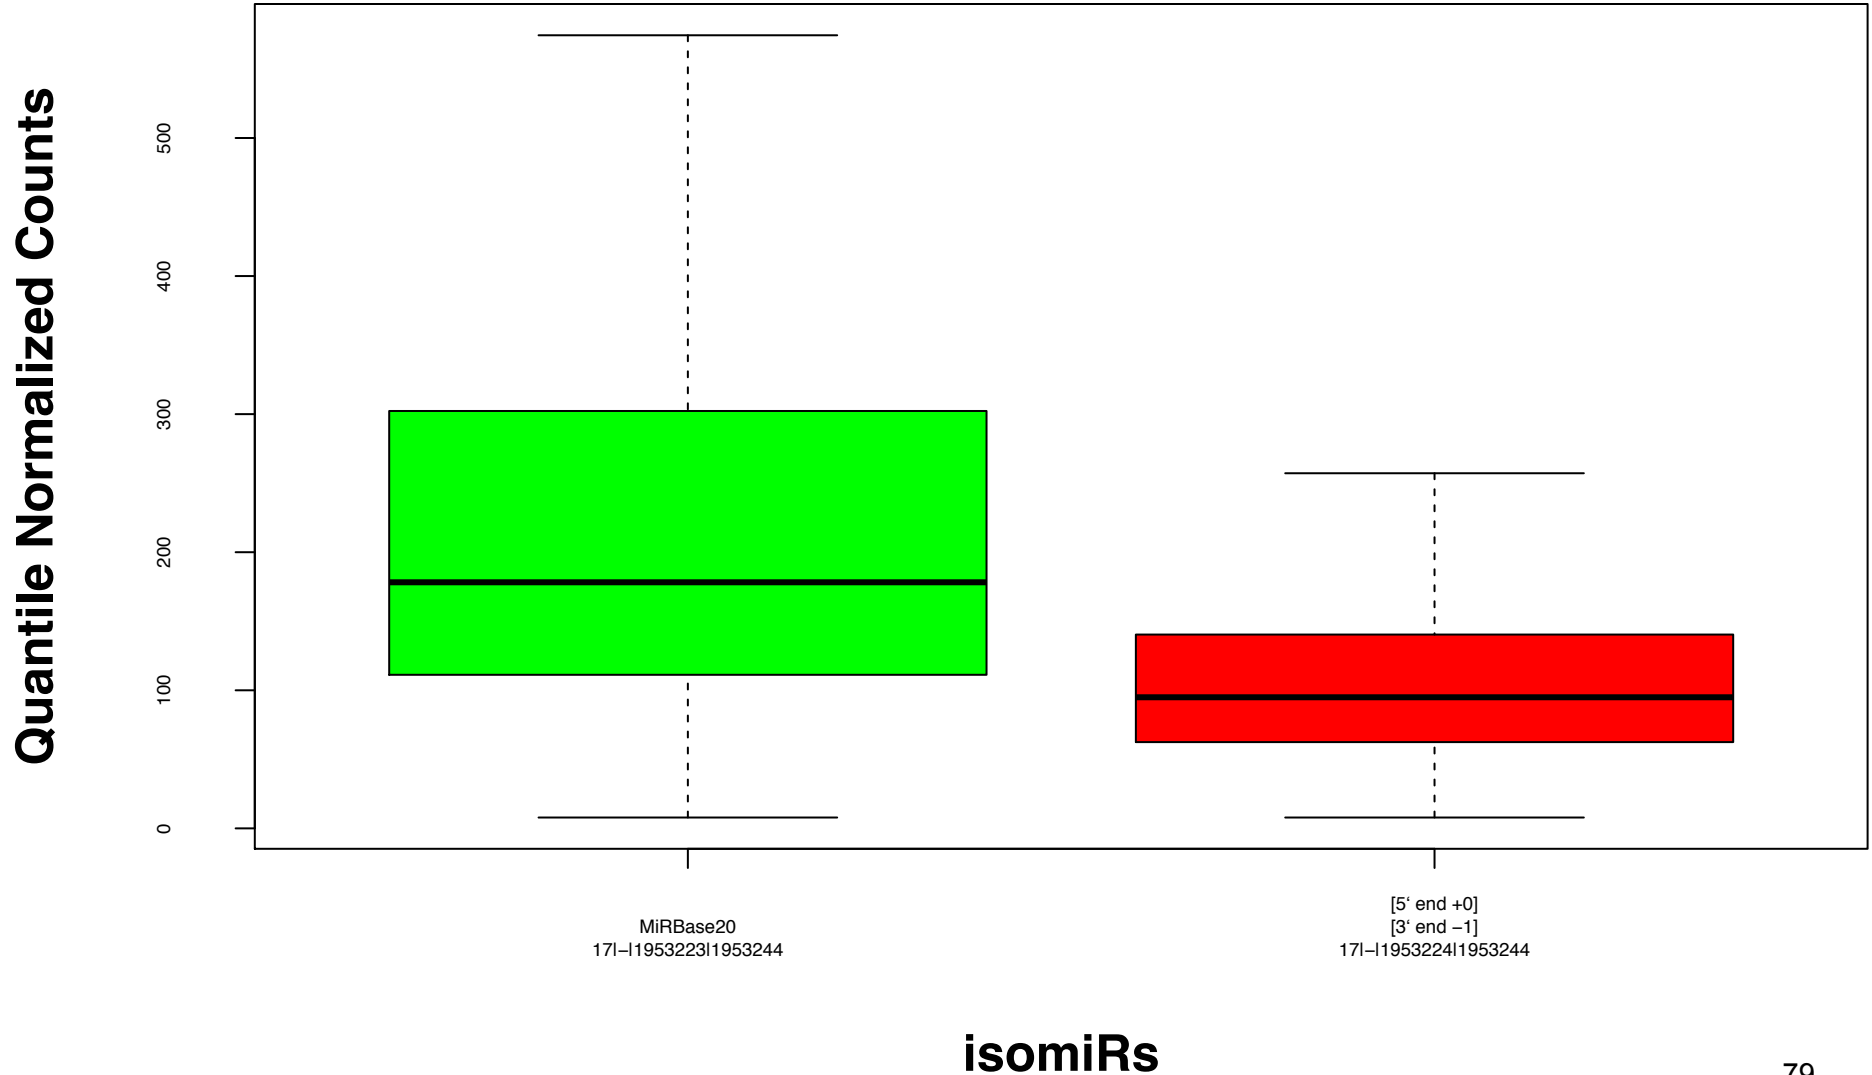



# MIMAT0000425=hsa-miR-130a-3p=MI0000448

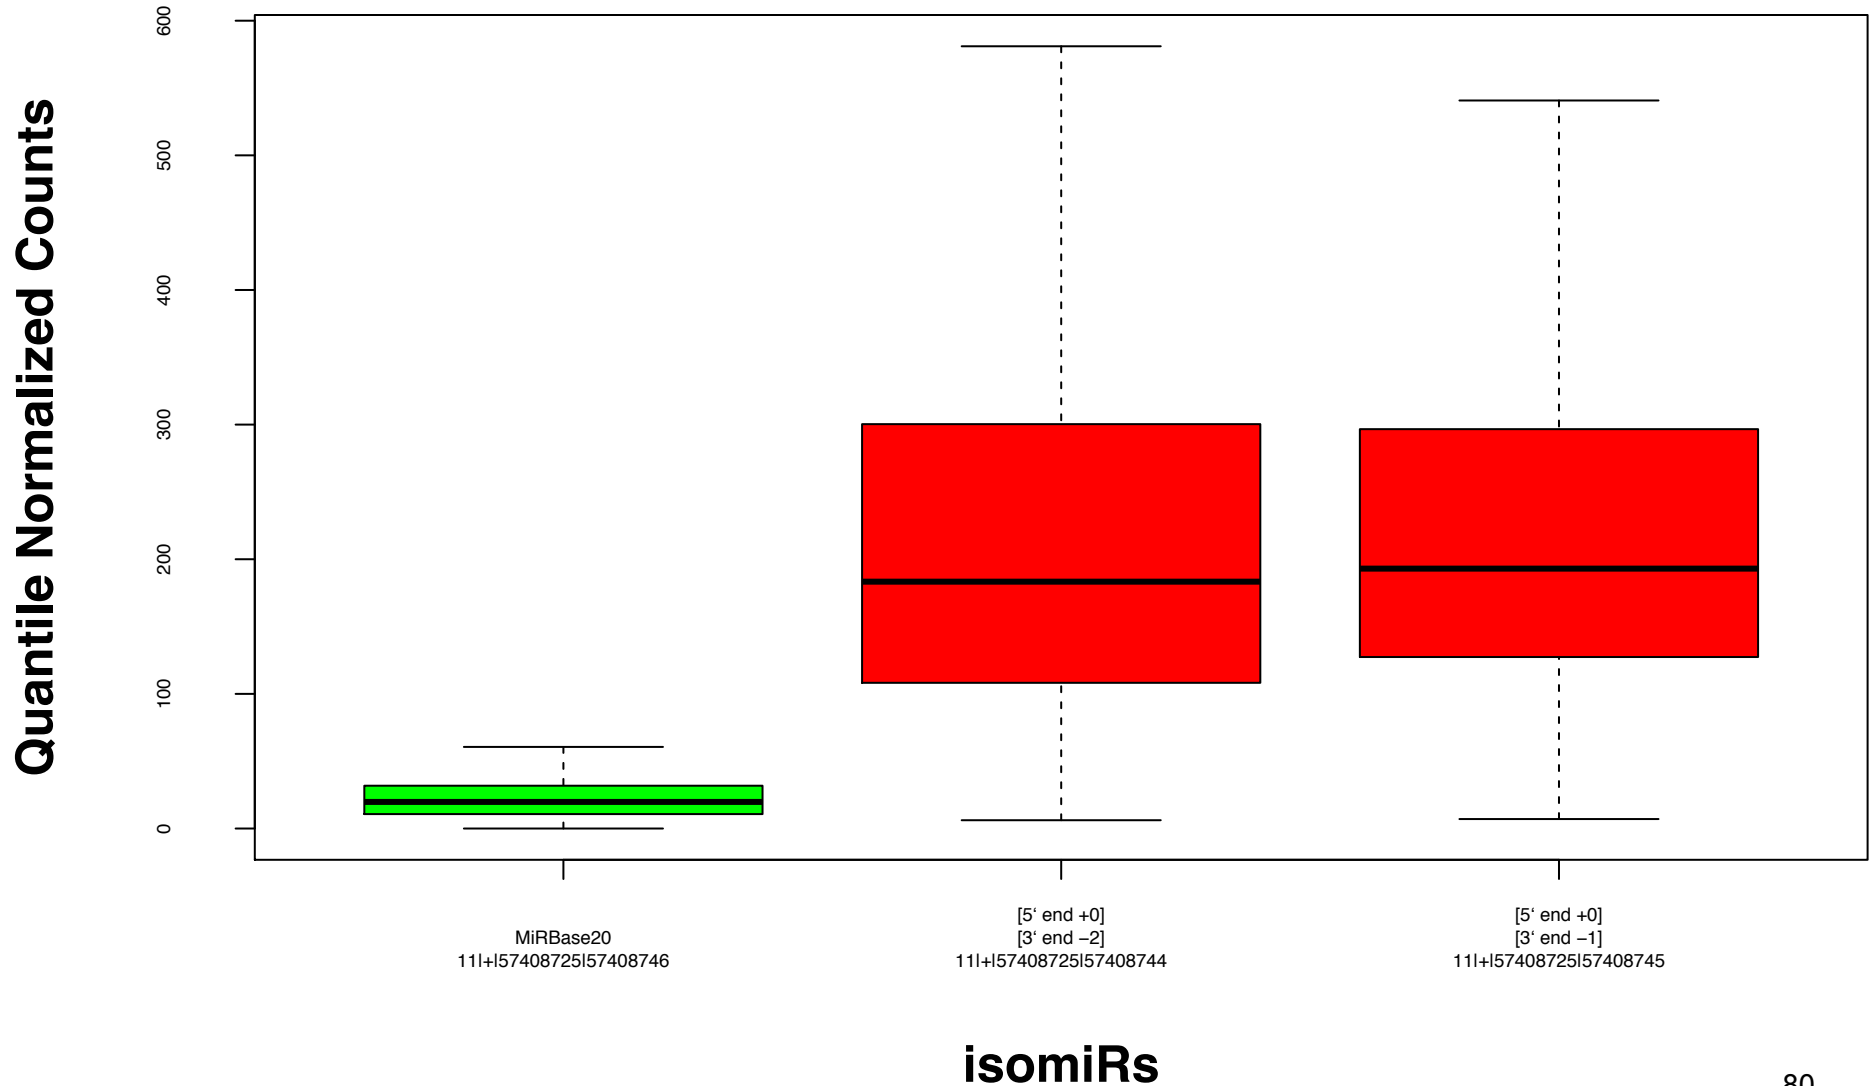

# MIMAT0000451=hsa-miR-150-5p=MI0000479

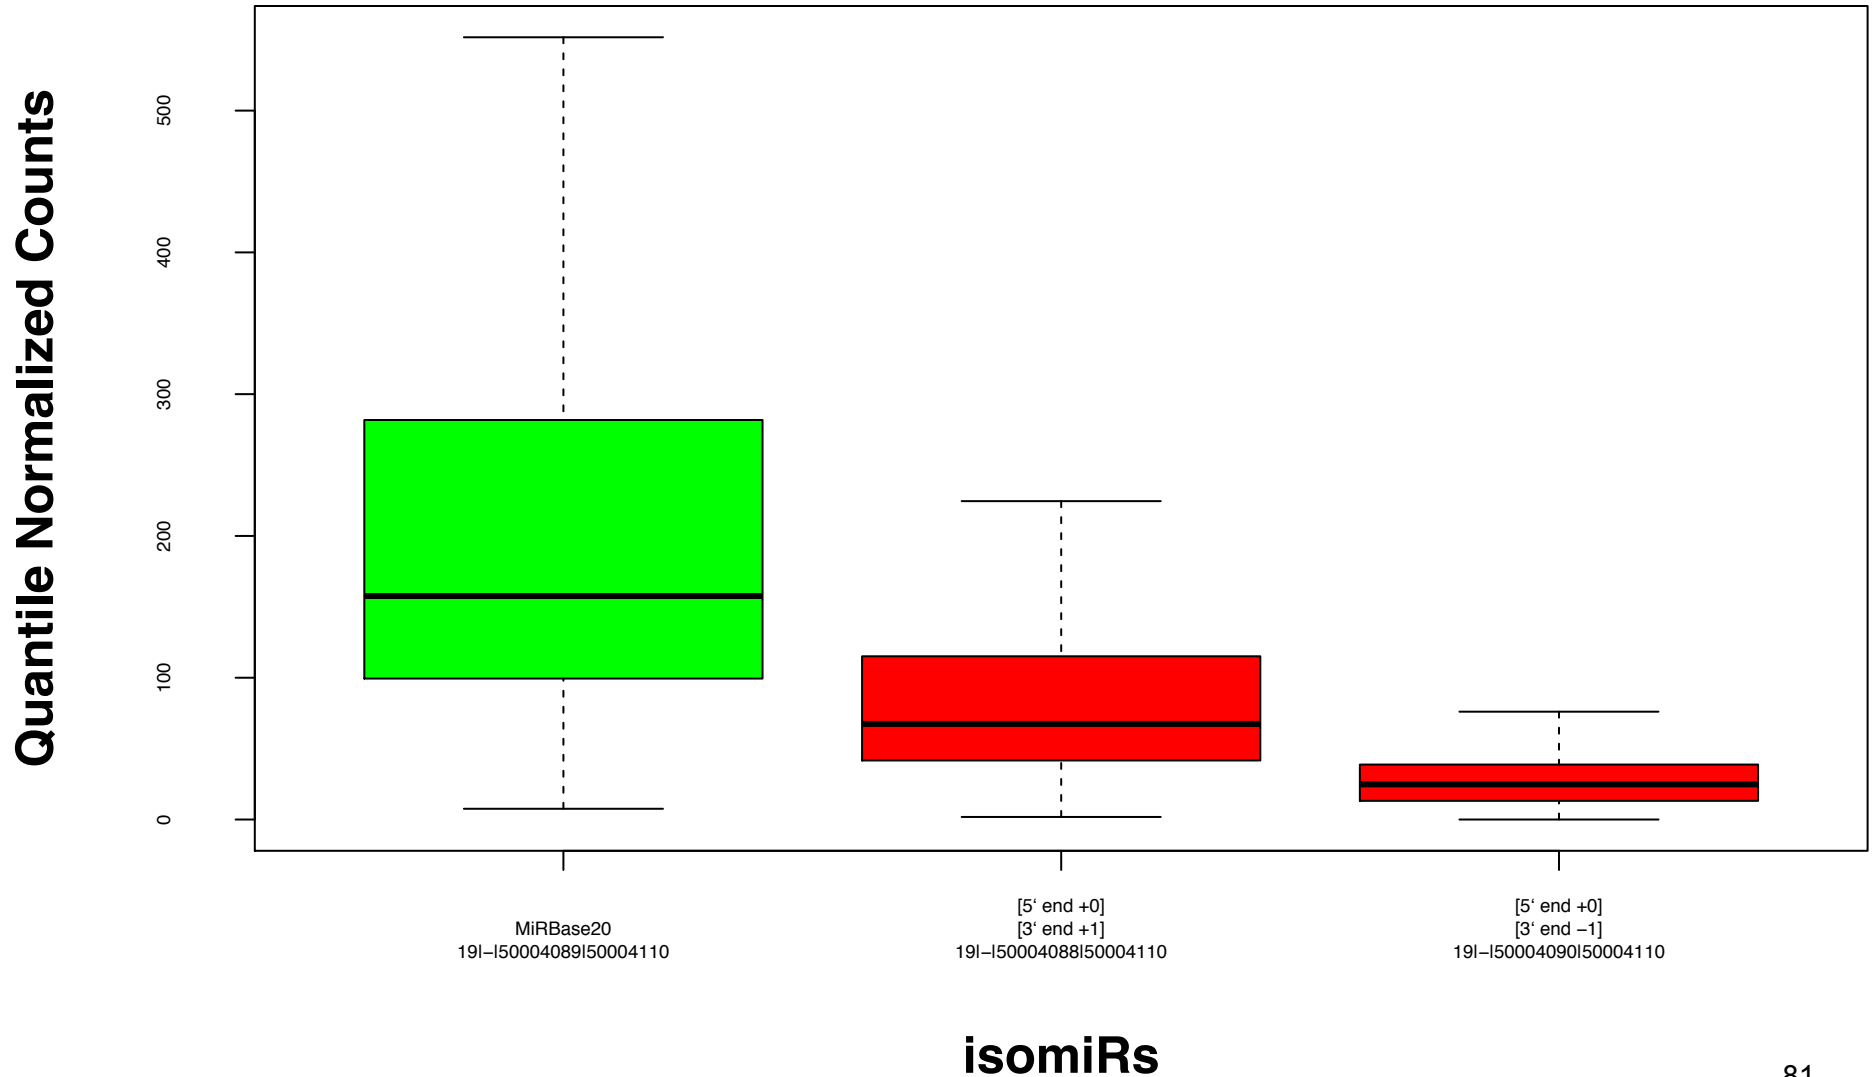

# MIMAT0004502=hsa-miR-28-3p=MI0000086

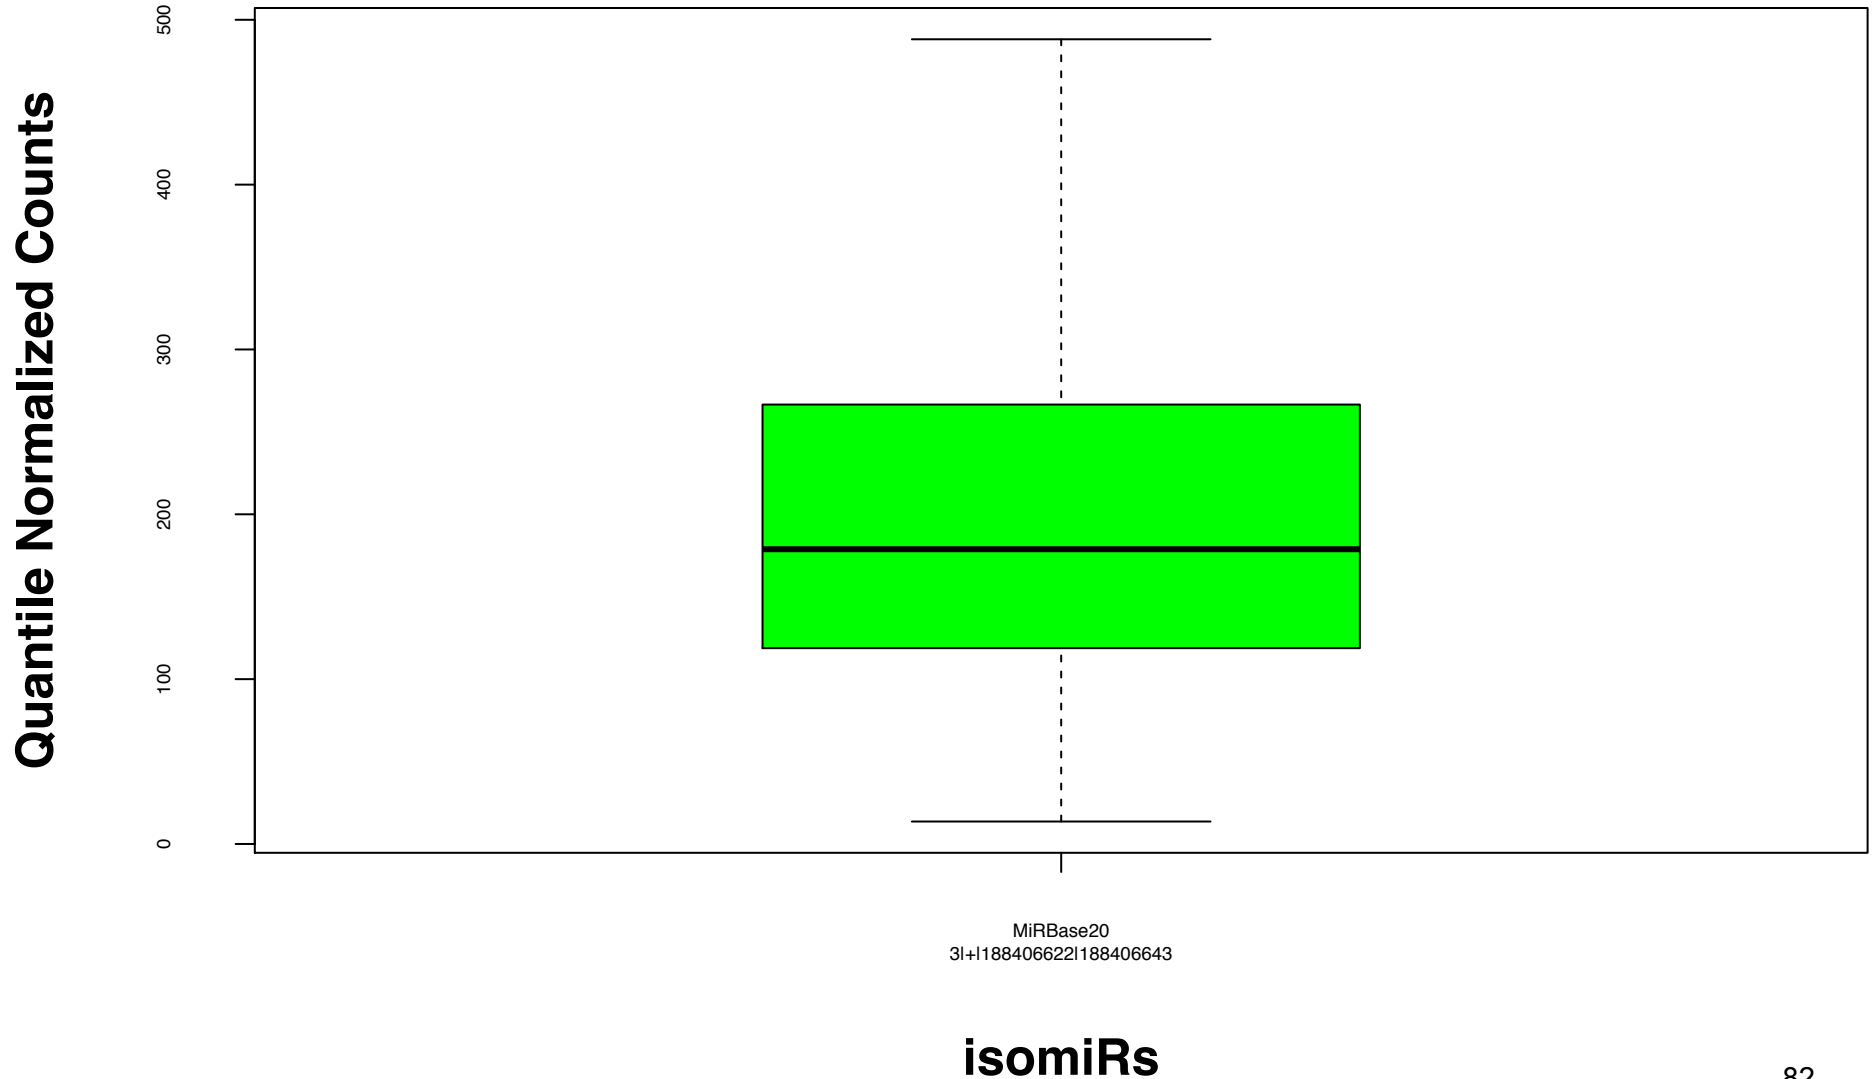

# MIMAT0000064=hsa-let-7c-5p=MI0000064

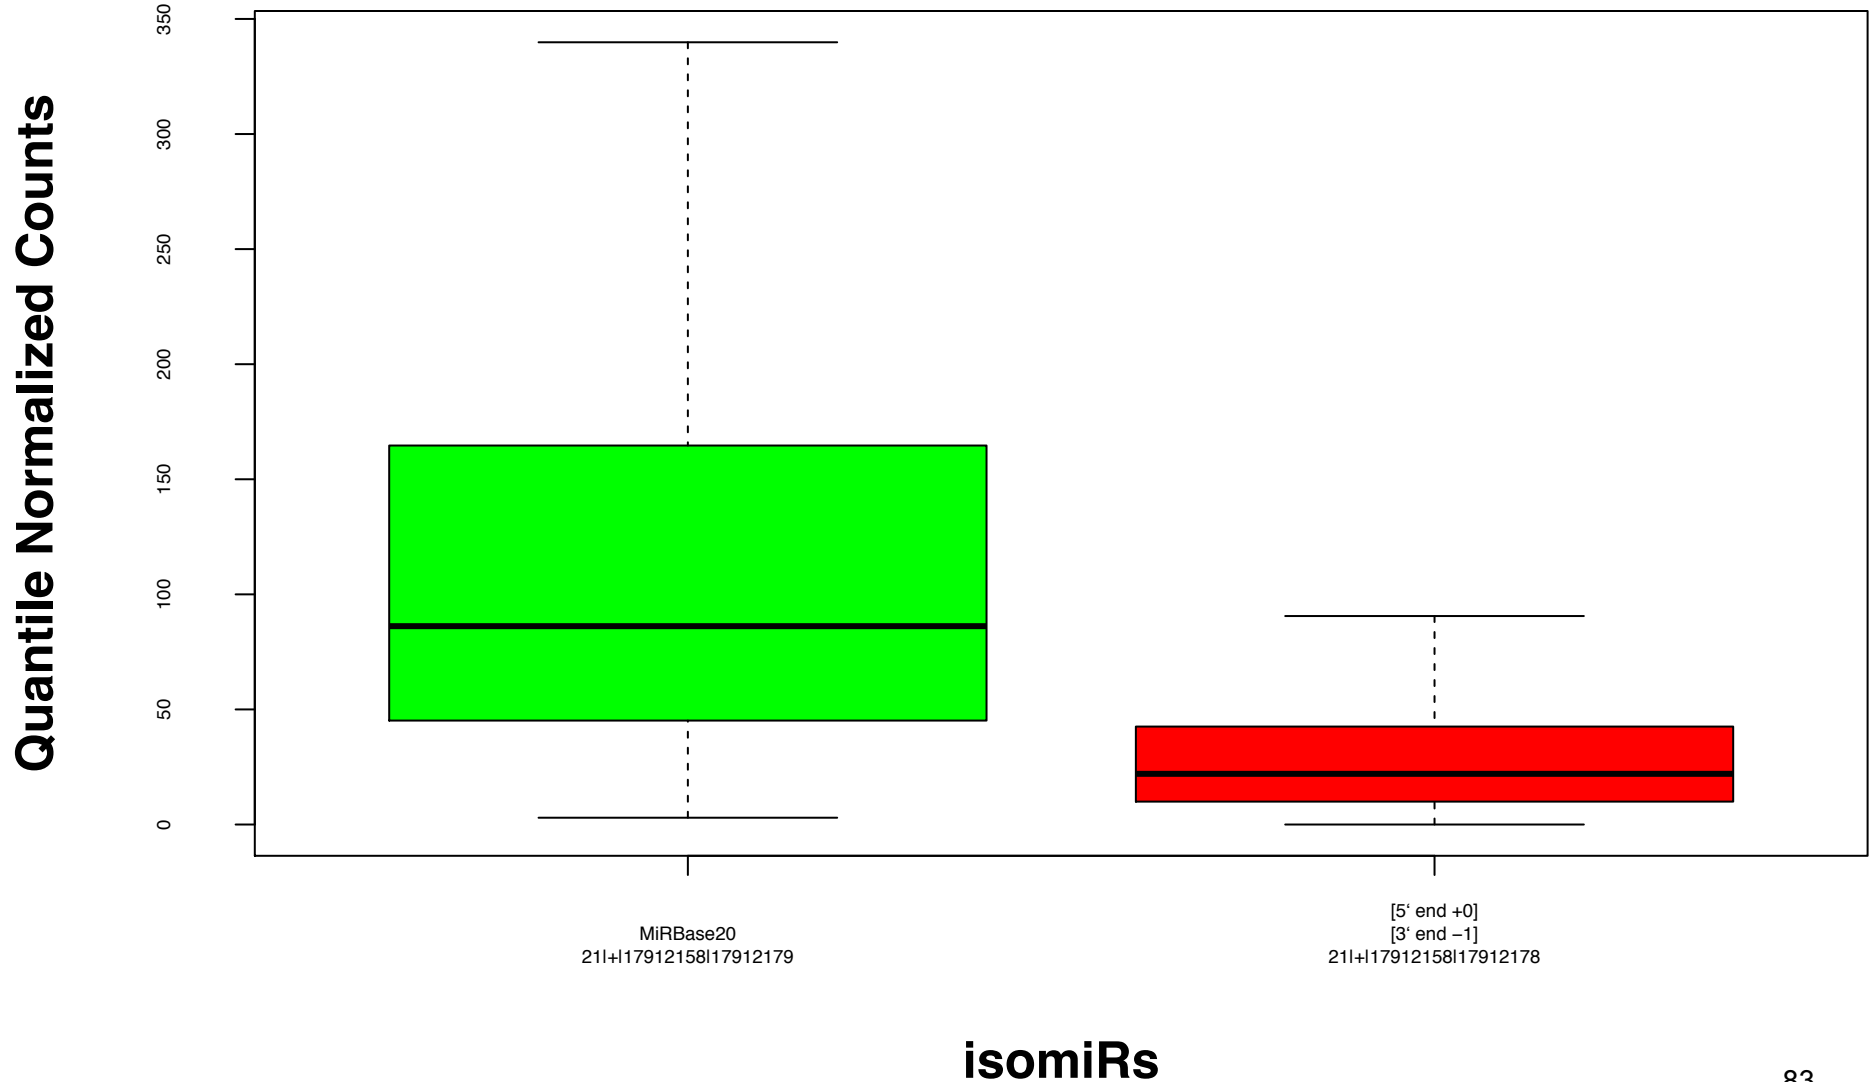

# MIMAT0005951=hsa-miR-1307-3p=MI0006444

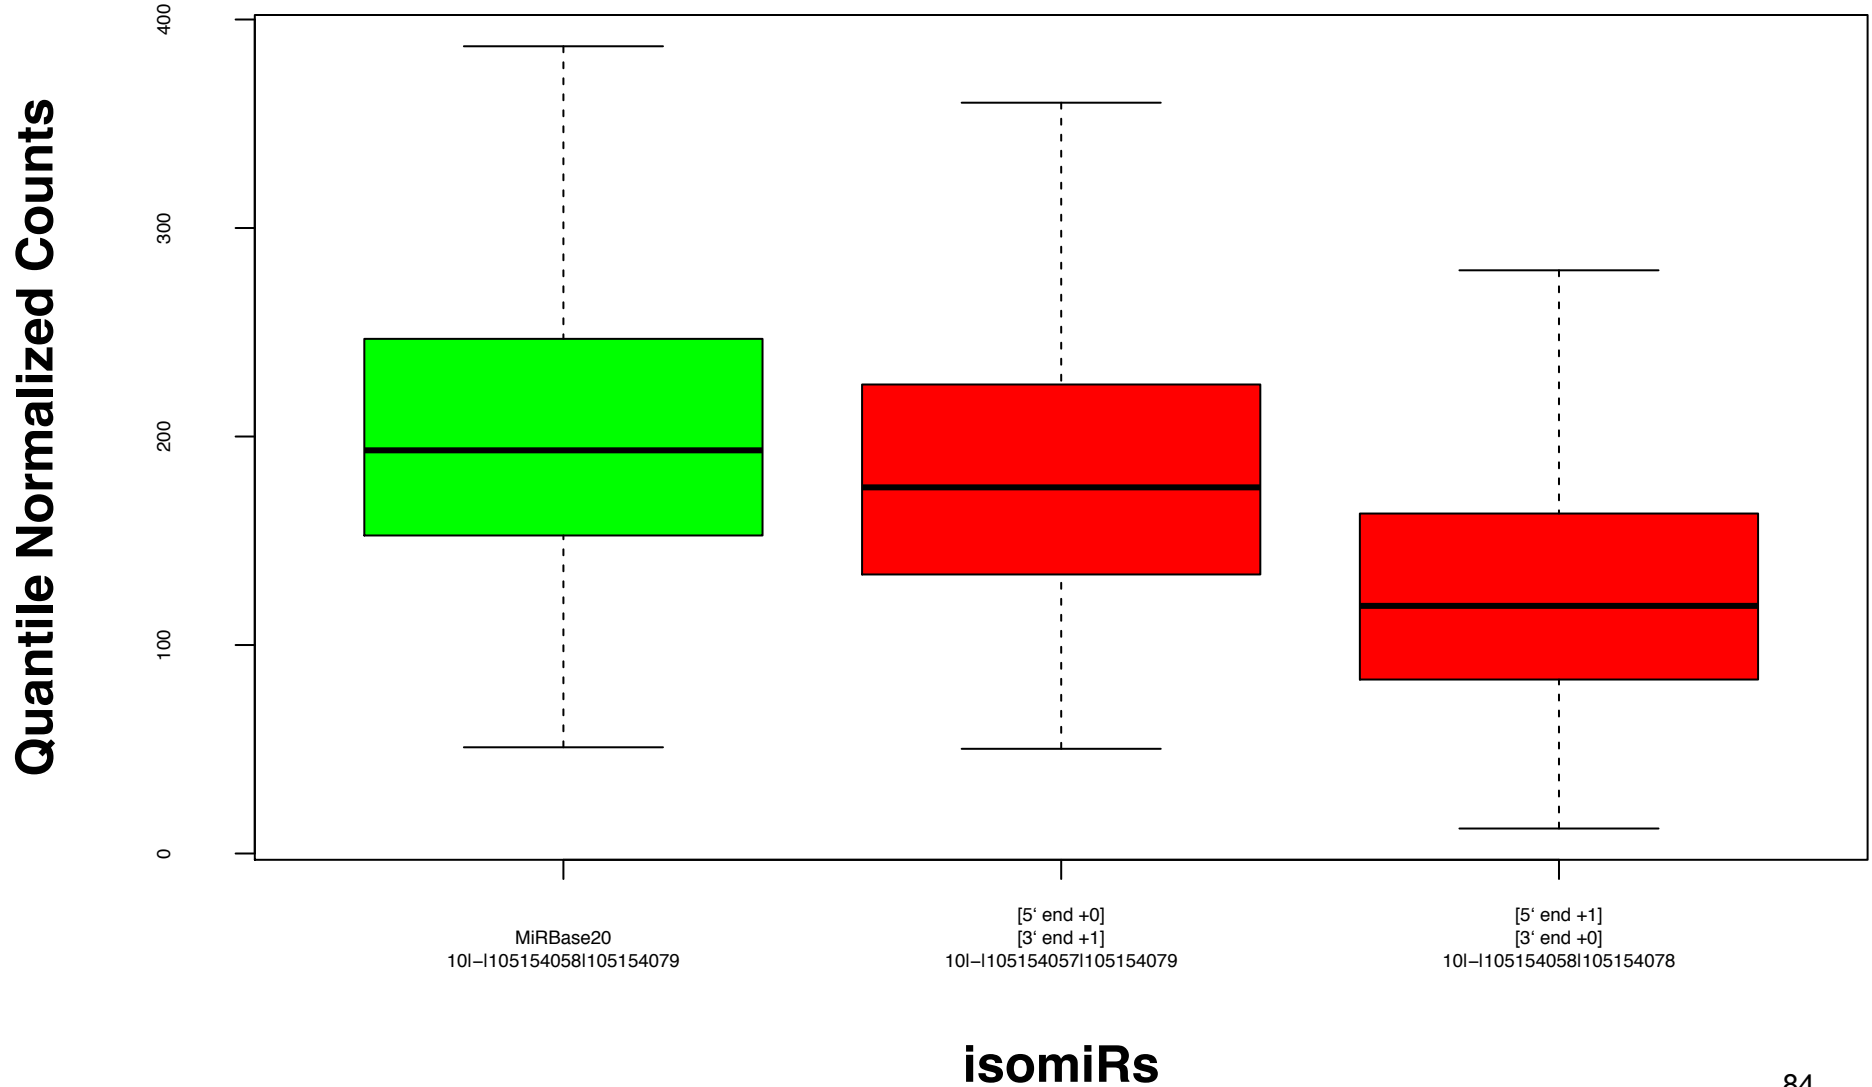

# MIMAT0004911=hsa-miR-874-3p=MI0005532

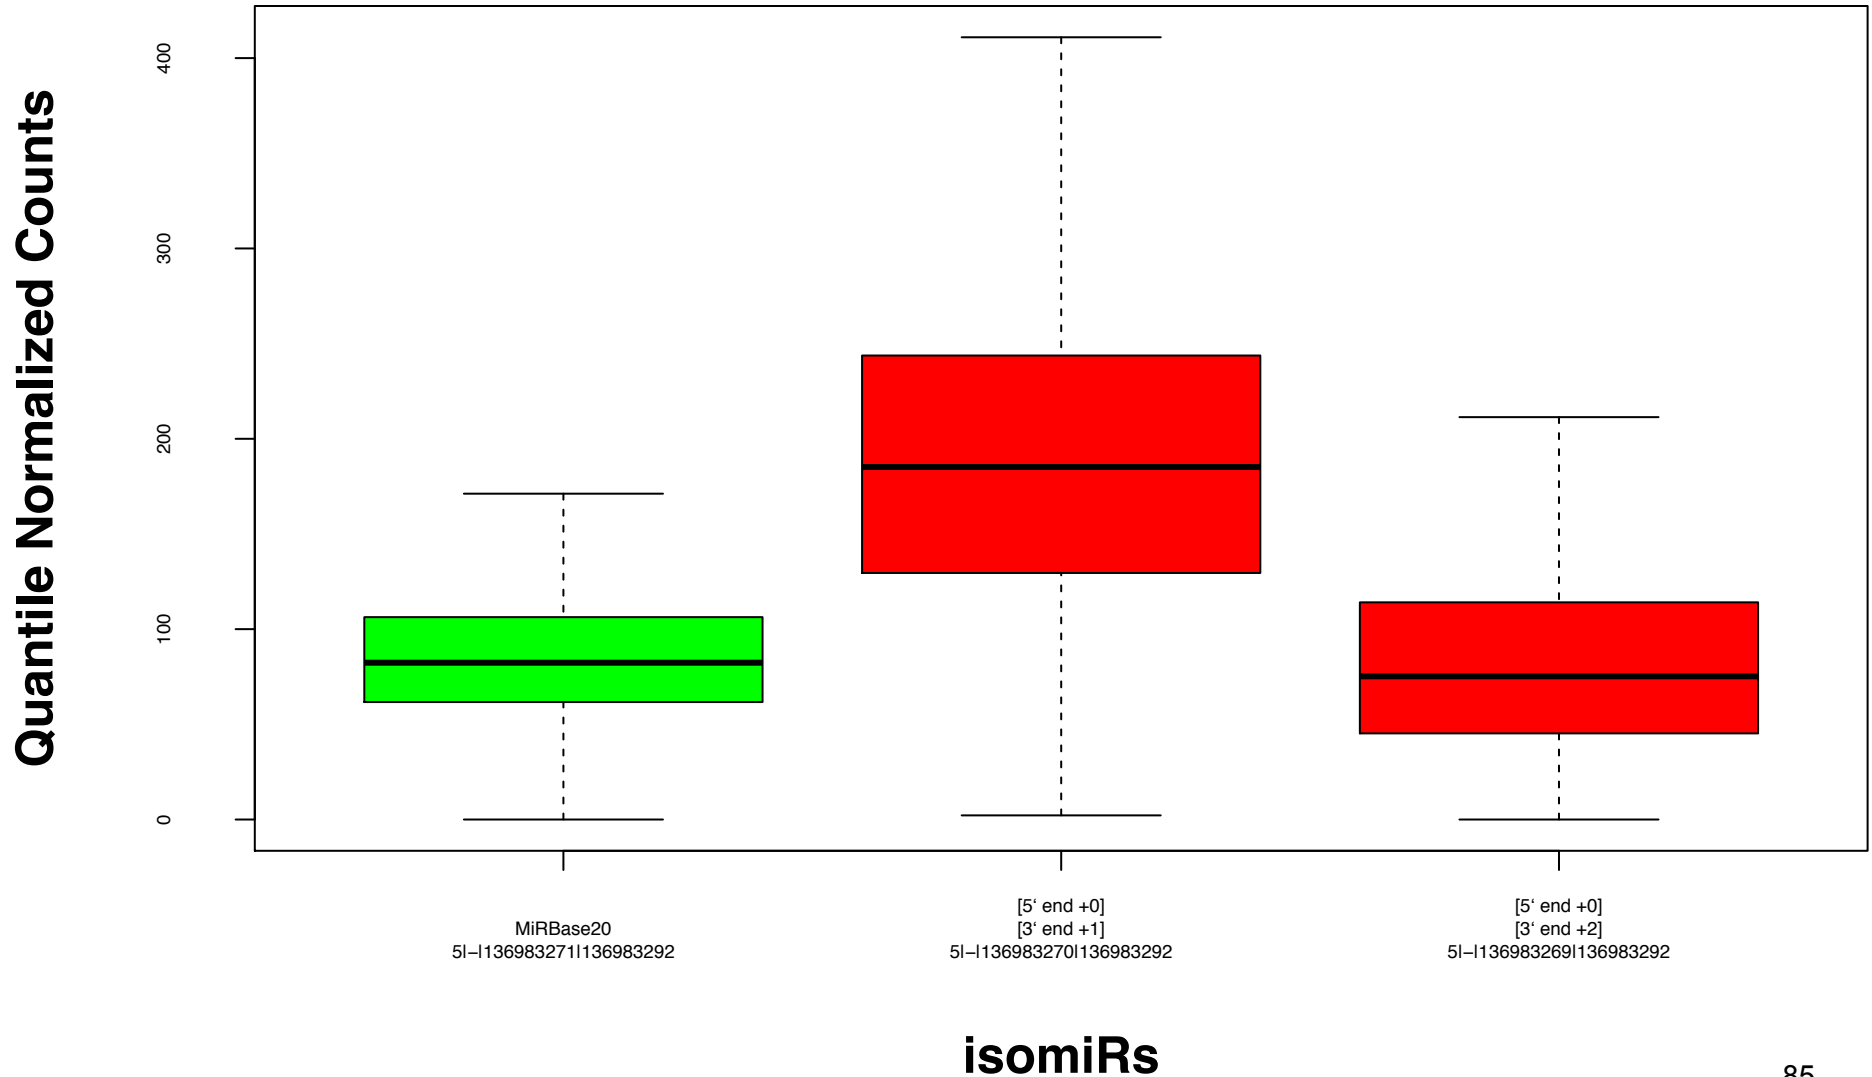

# MIMAT0004484=hsa-let-7d-3p=MI0000065

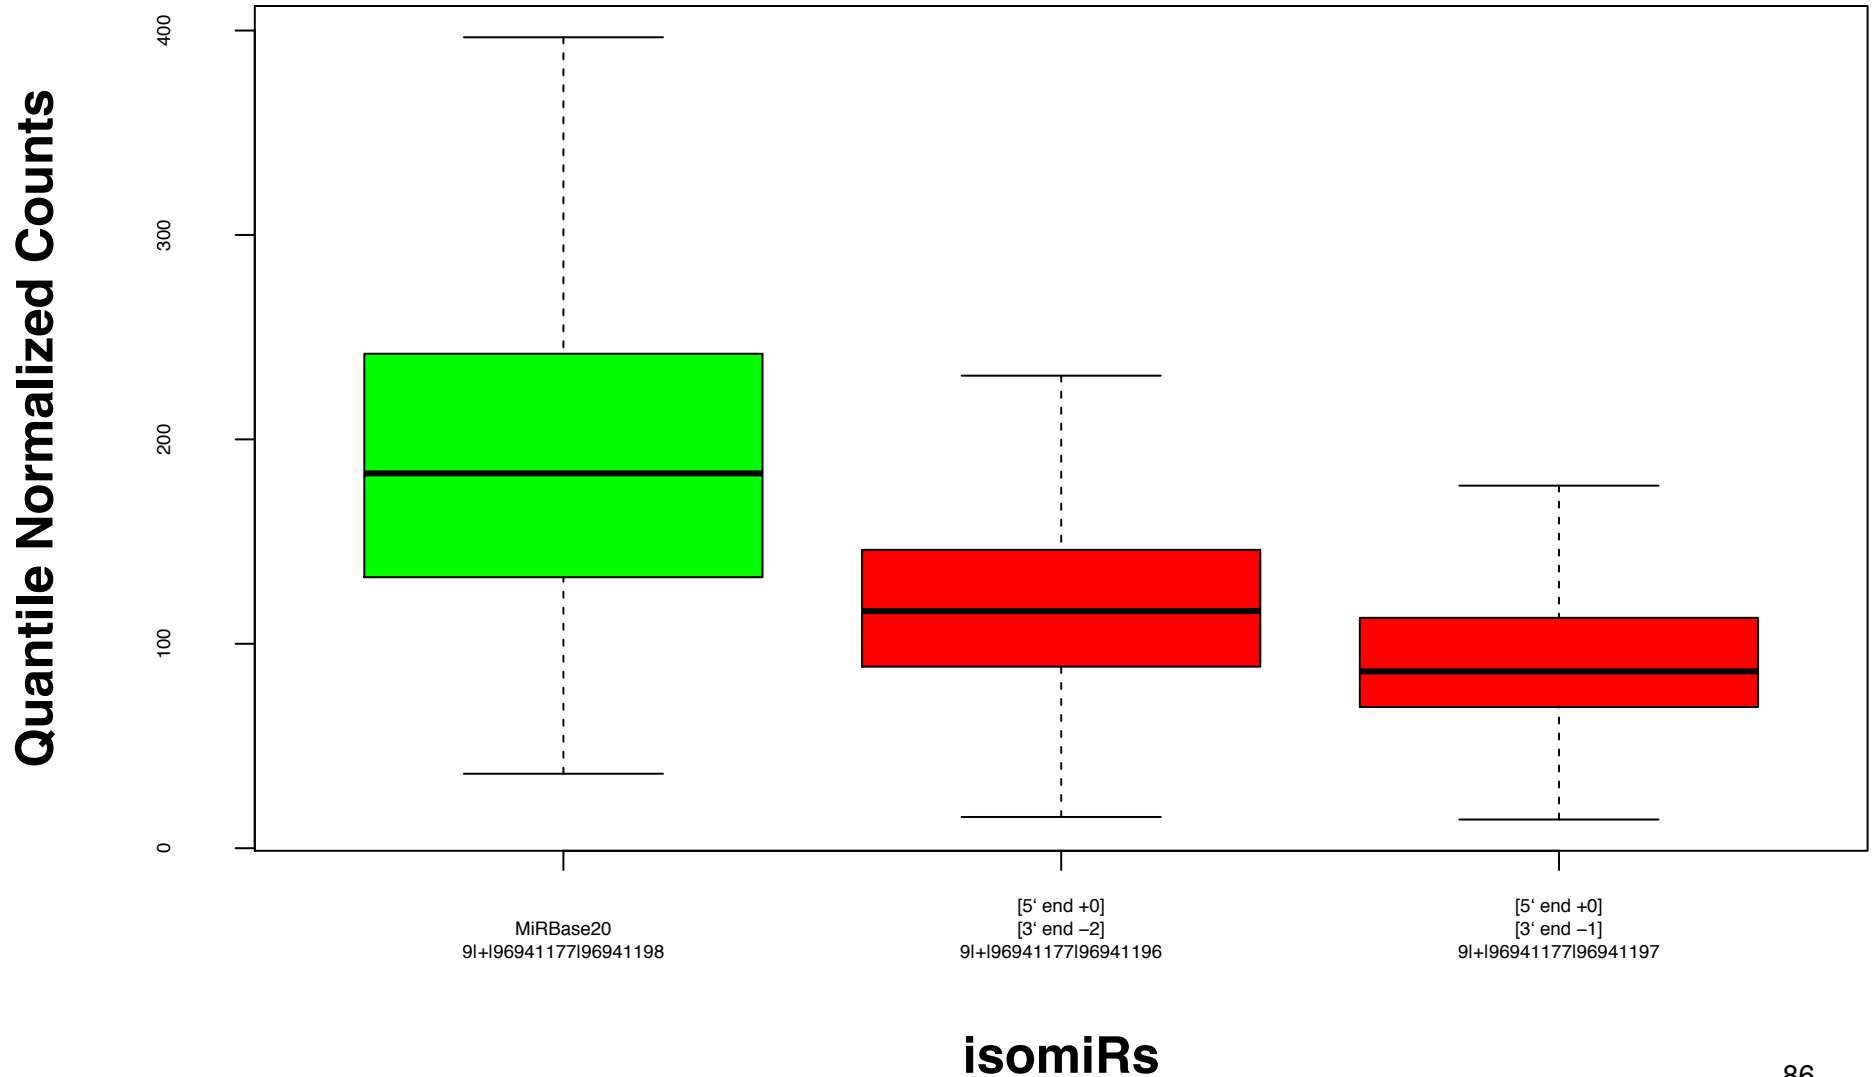

# MIMAT0000432=hsa-miR-141-3p=MI0000457

Quantile Normalized Counts

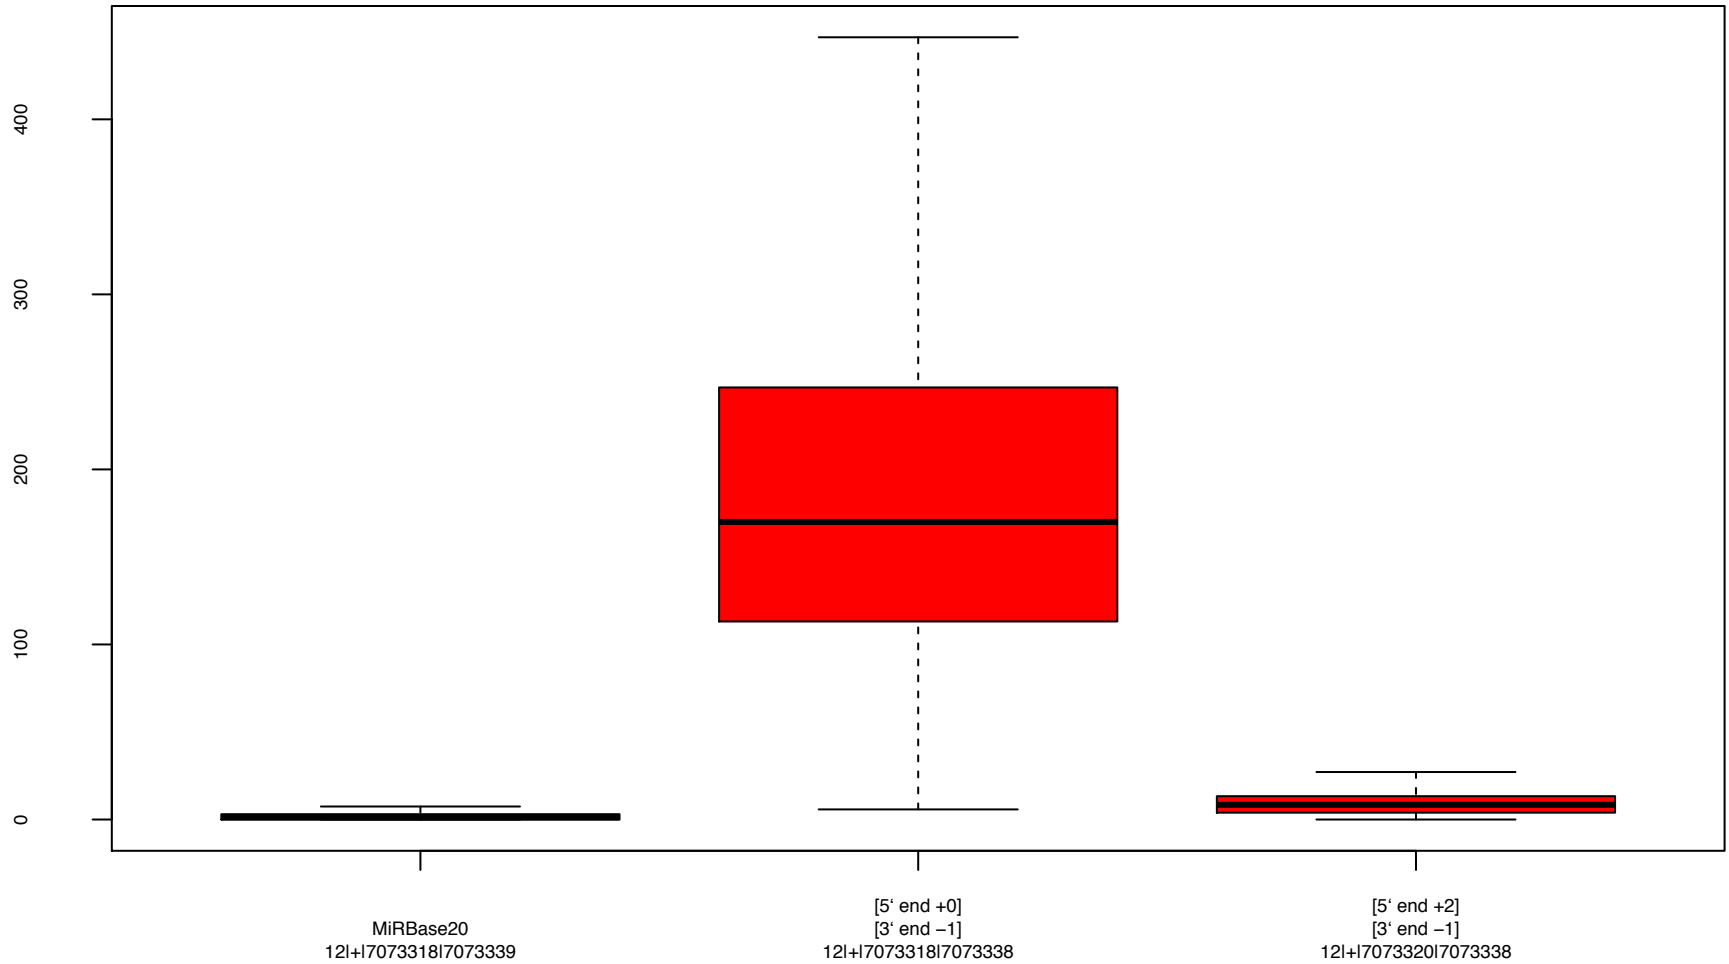

isomiRs



# MIMAT0000257\_1=hsa-miR-181b-5p=MI0000683

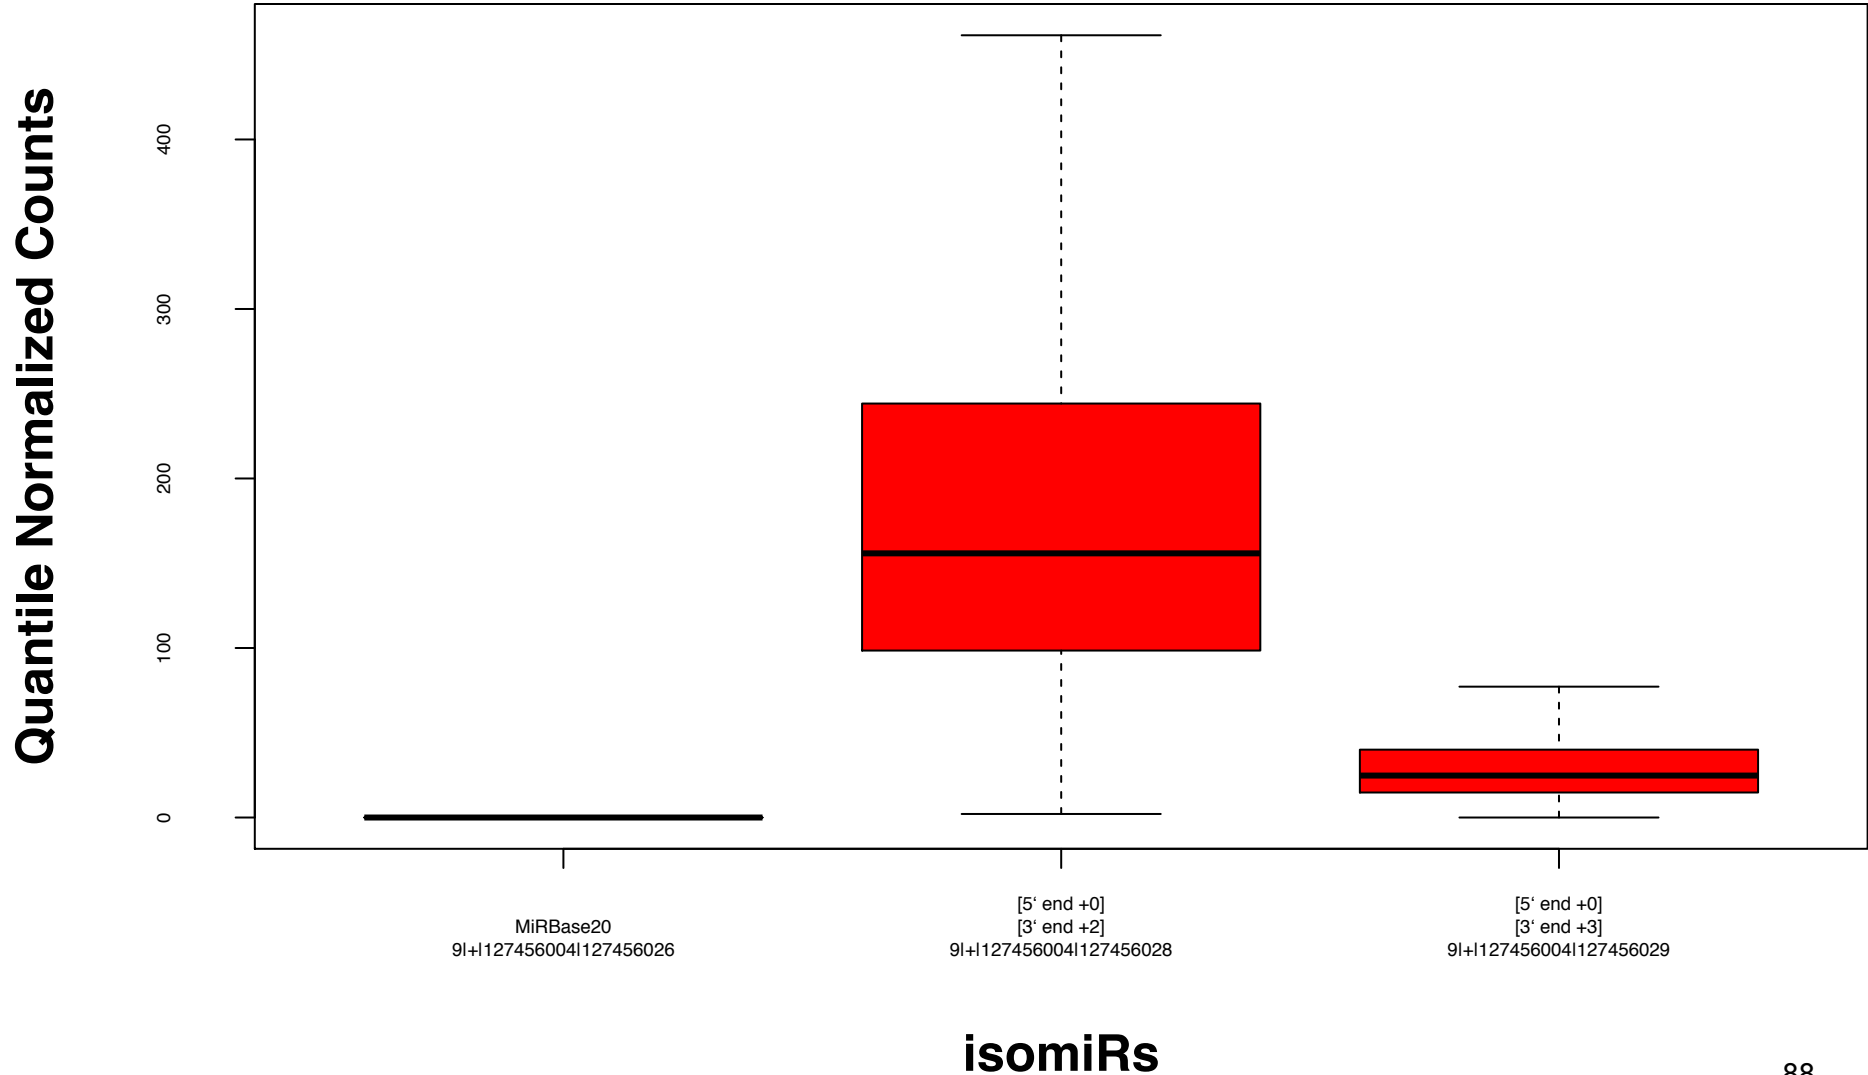

# MIMAT0004680=hsa-miR-130b-5p=MI0000748

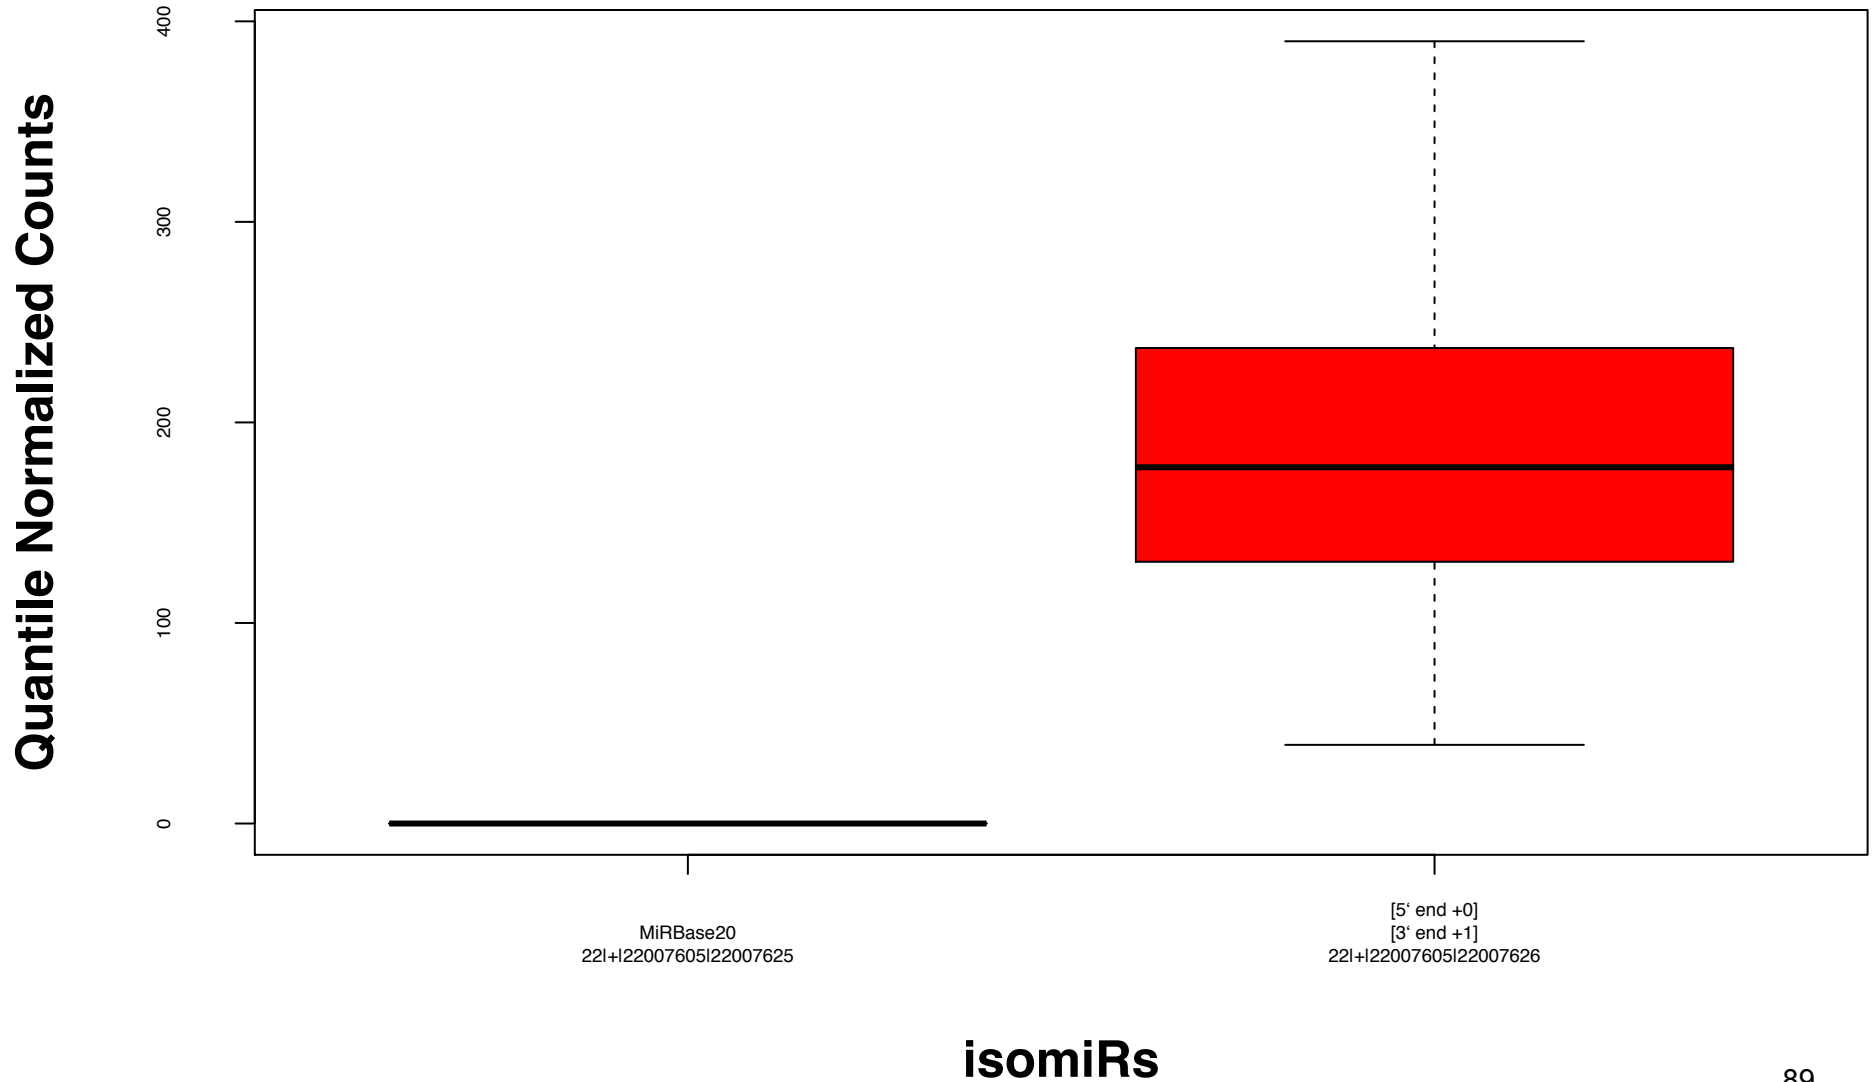

# MIMAT0000087=hsa-miR-30a-5p=MI0000088

Quantile Normalized Counts

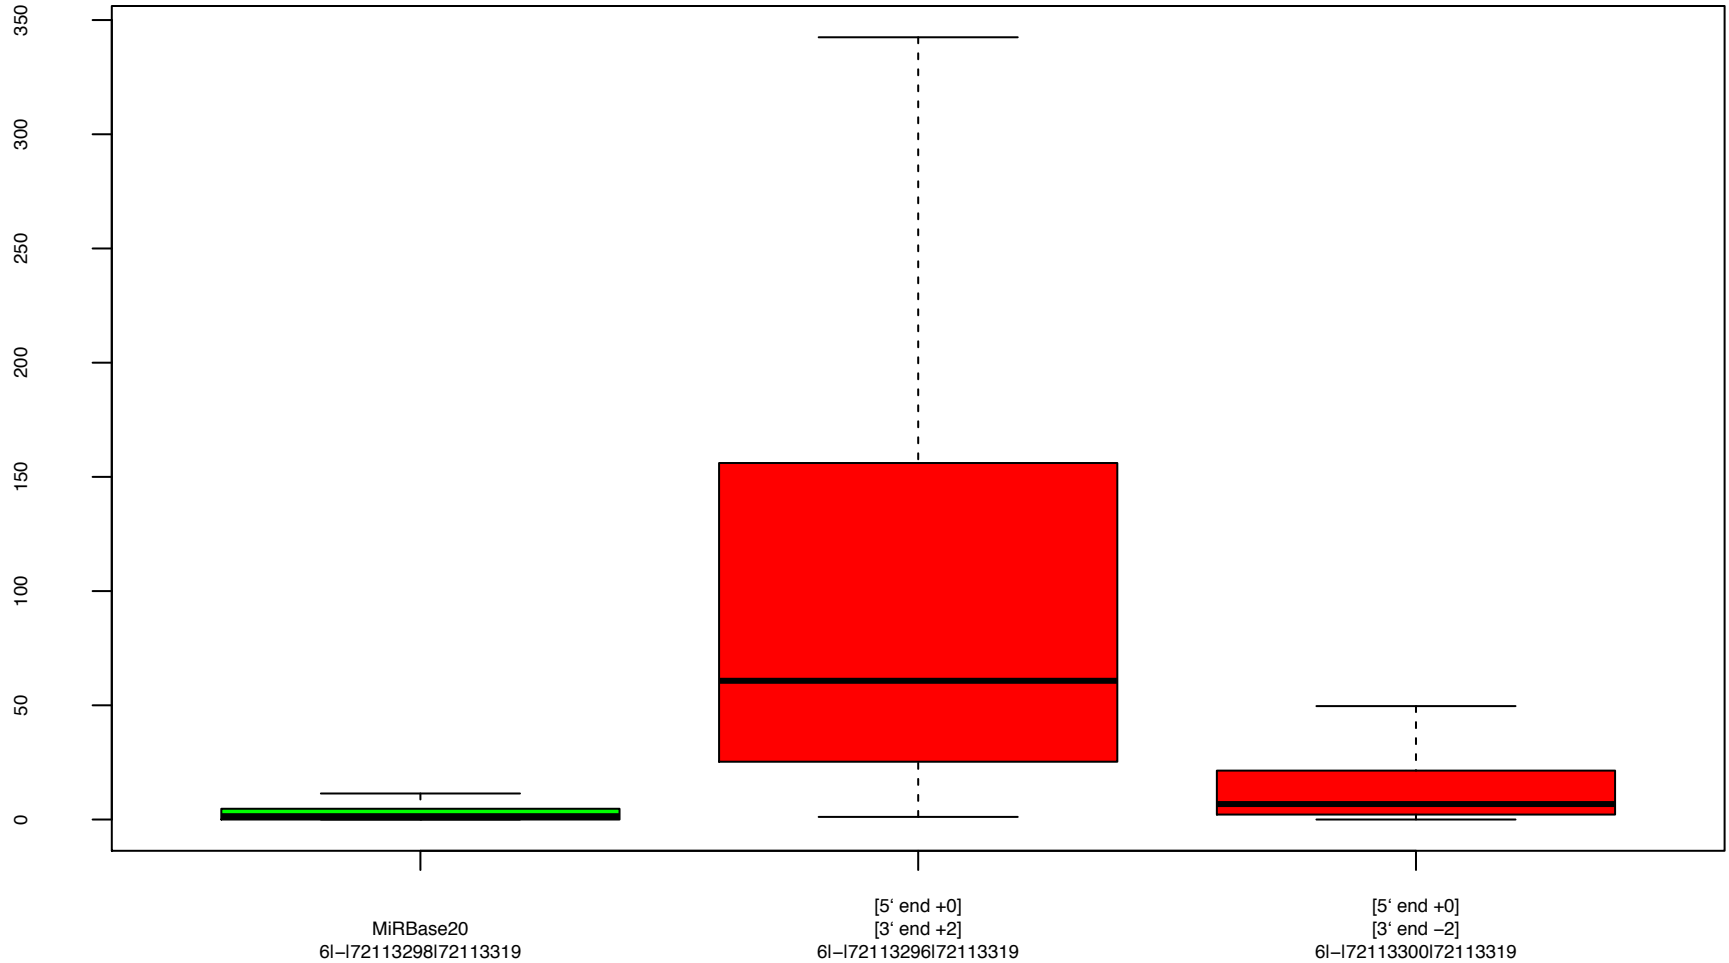

isomiRs

# MIMAT0000443=hsa-miR-125a-5p=MI0000469

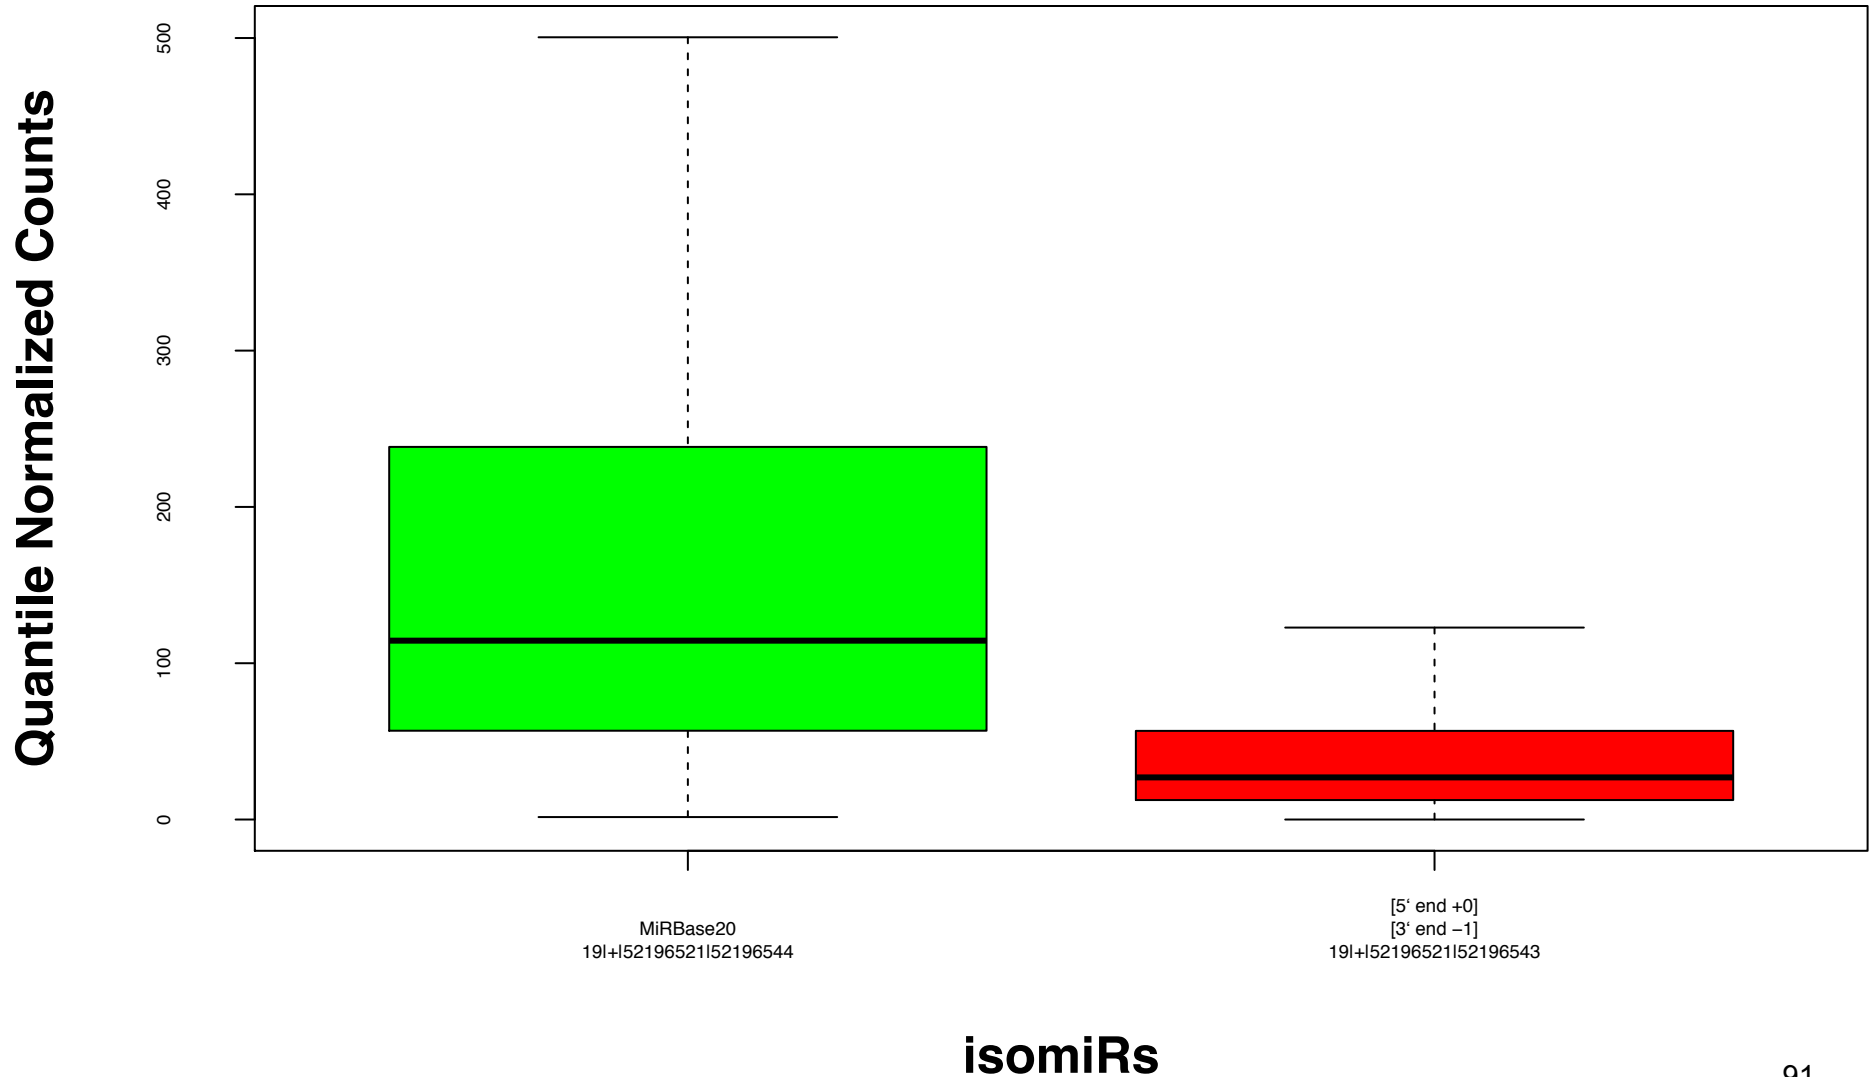

# MIMAT0004559=hsa-miR-181c-3p=MI0000271

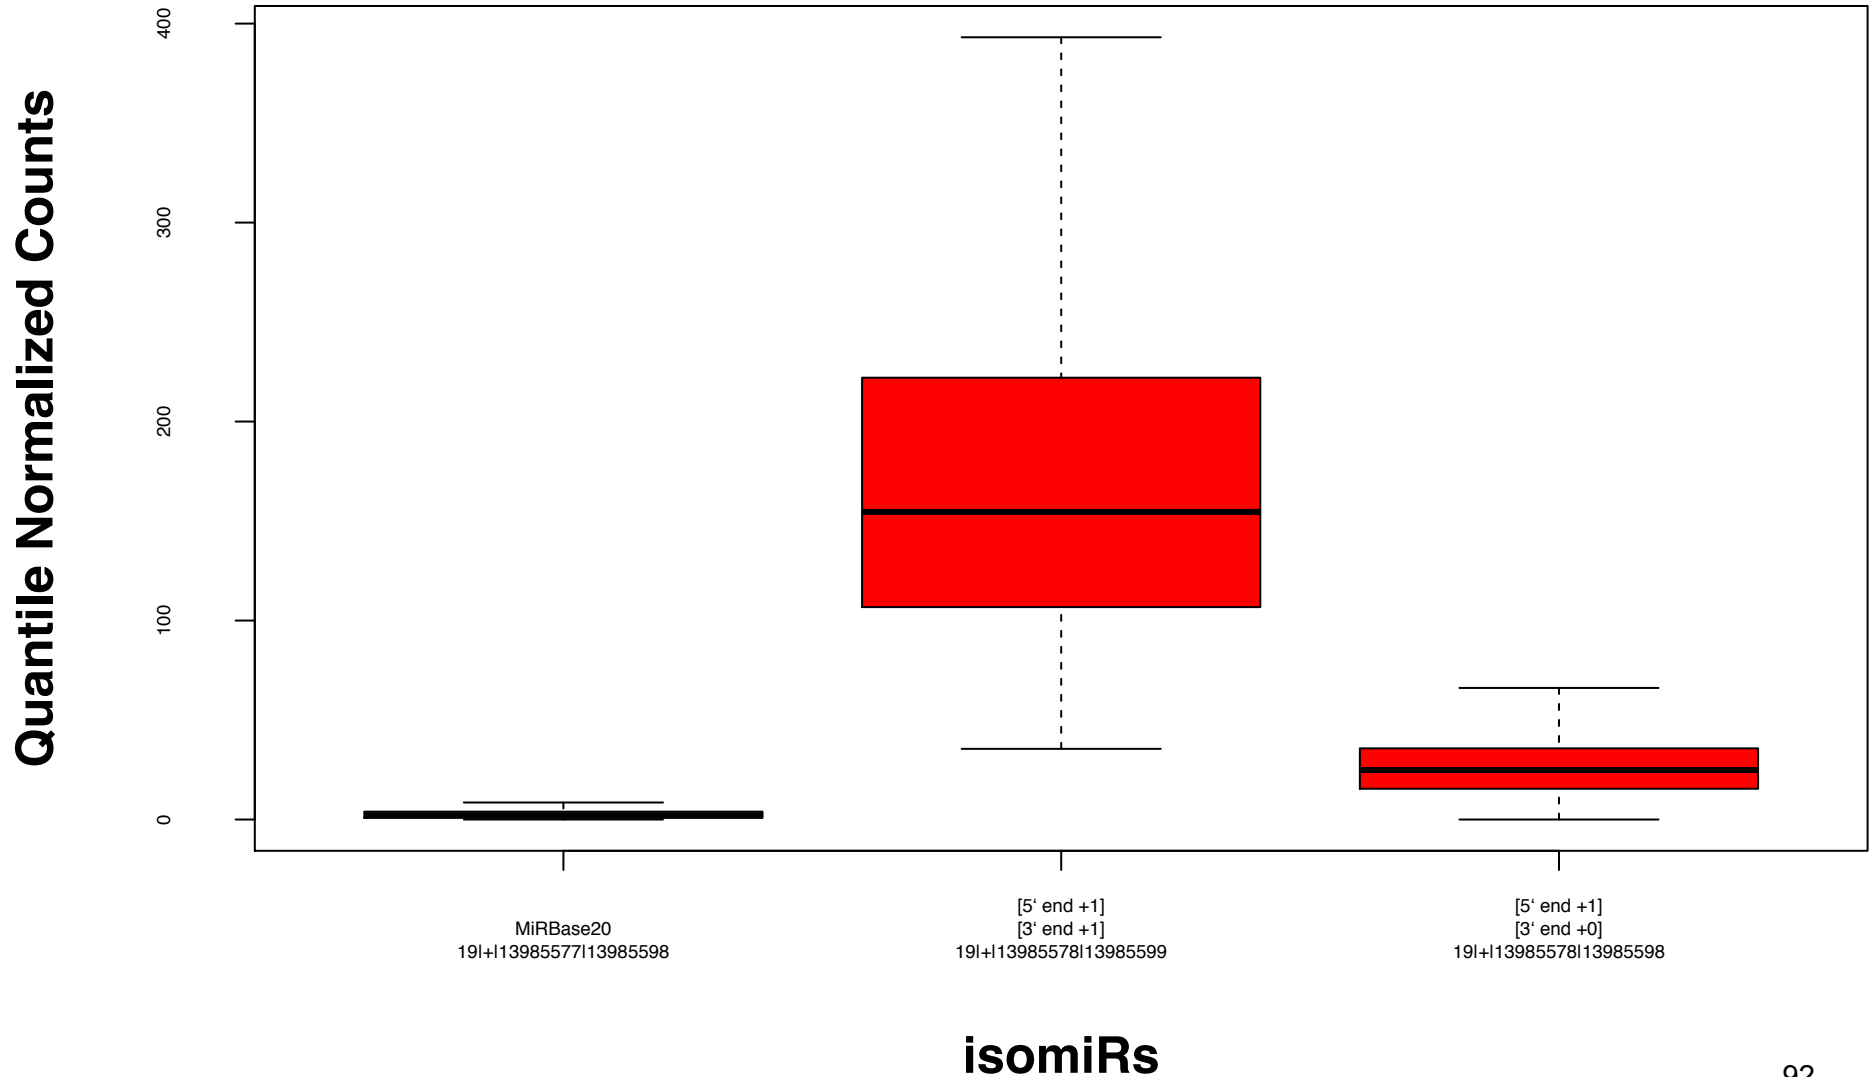

# MIMAT0000680=hsa-miR-106b-5p=MI0000734

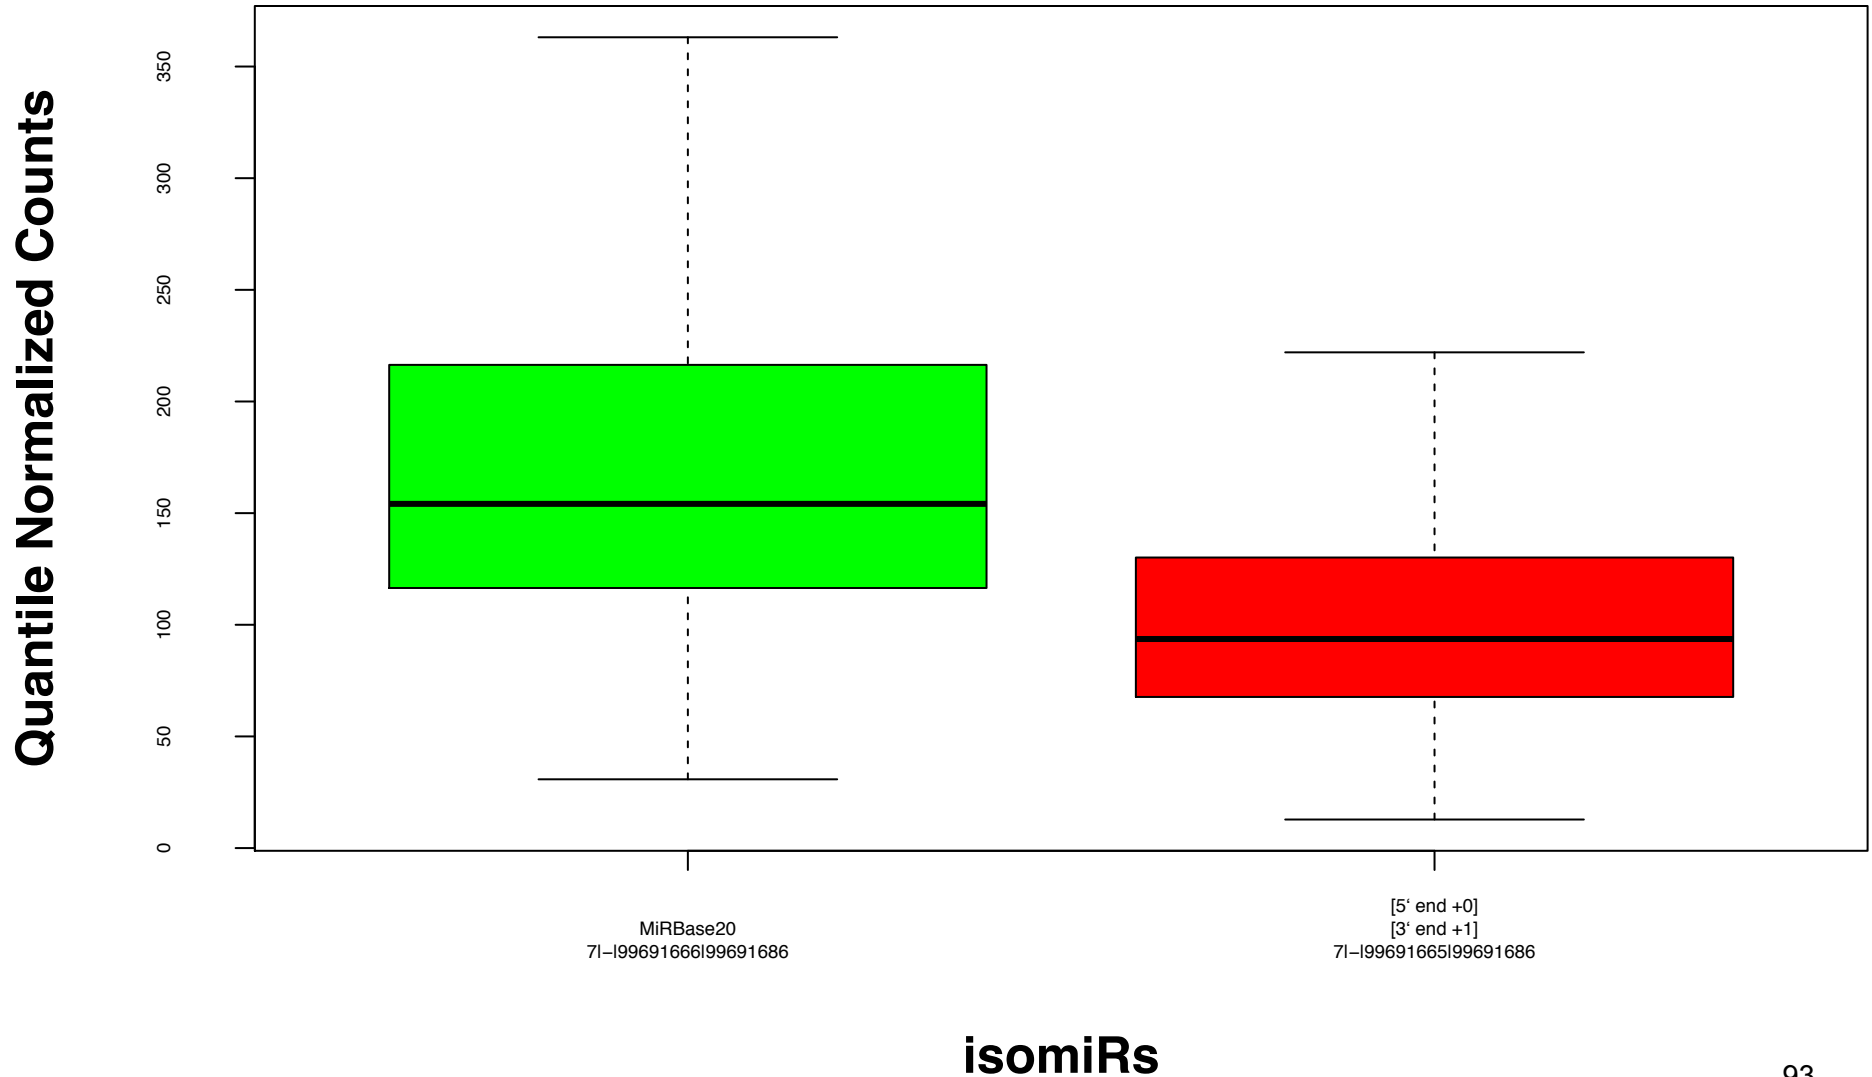

# MIMAT0000261=hsa-miR-183-5p=MI0000273

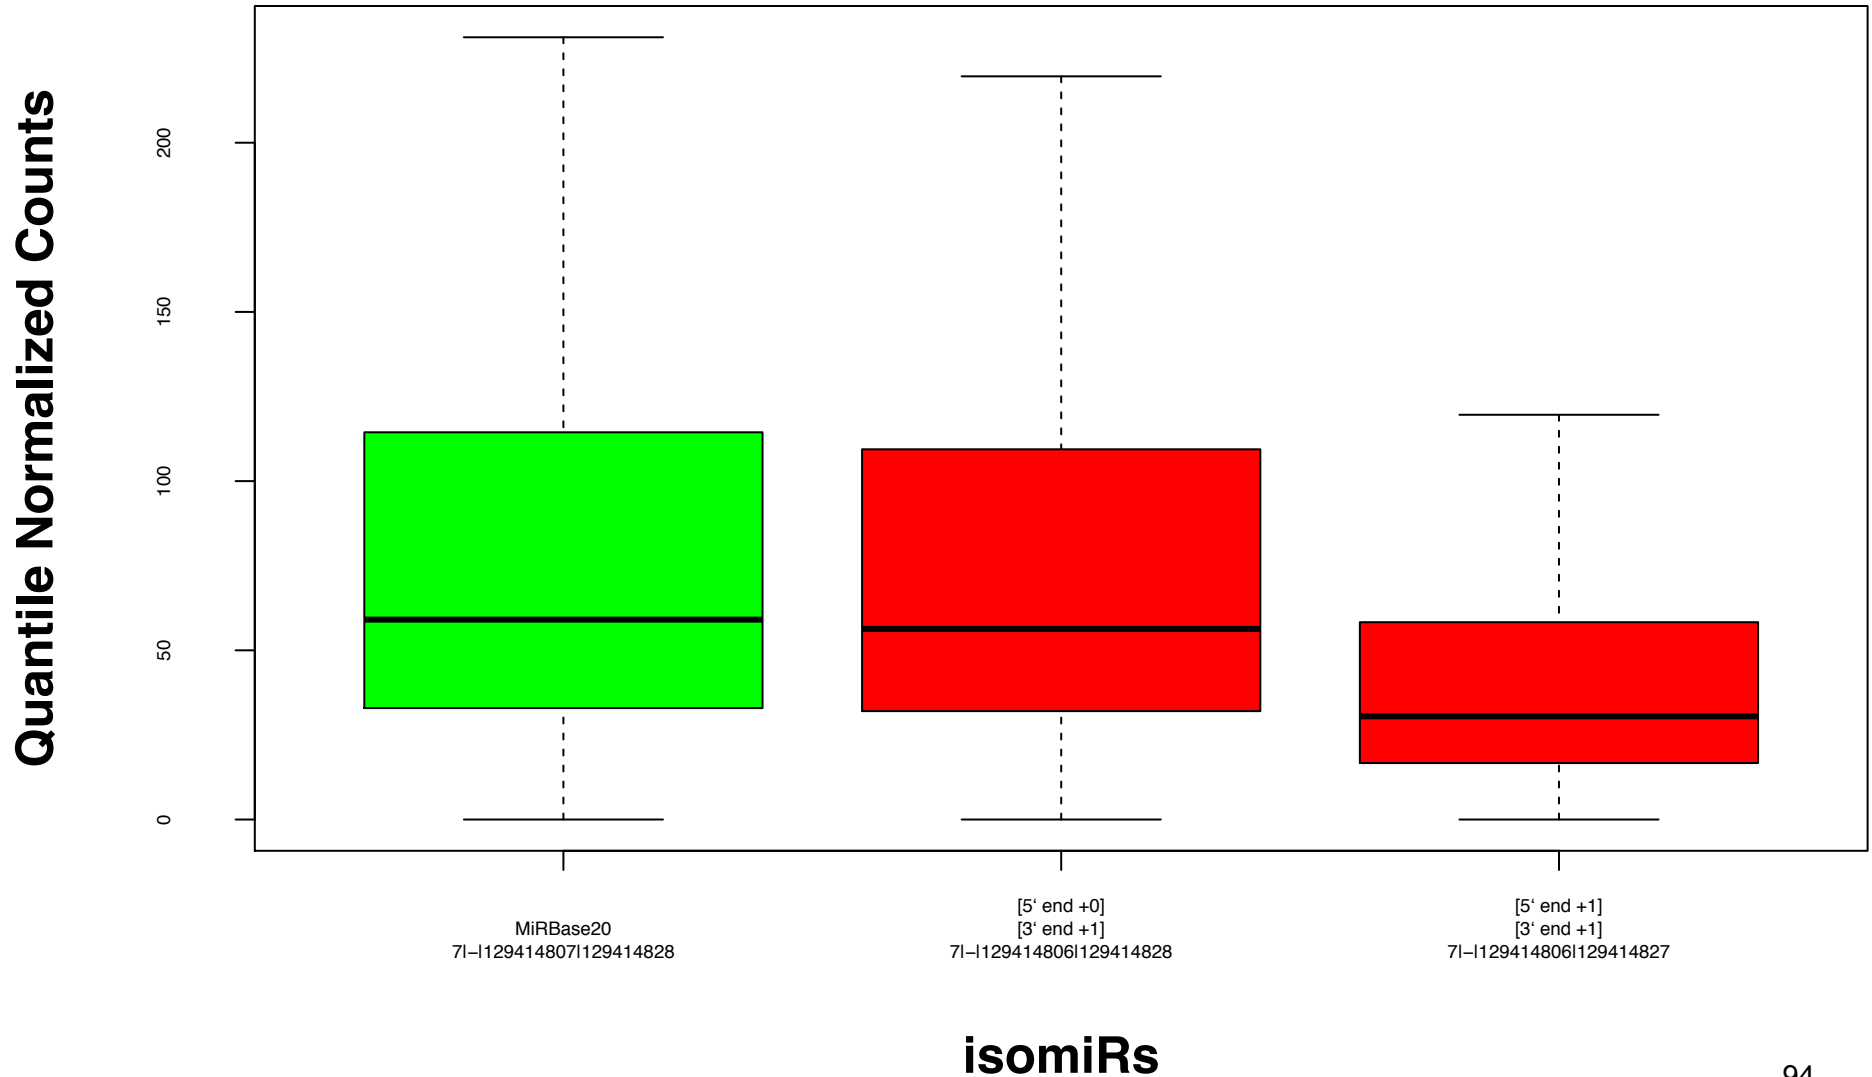

# MIMAT0004518=hsa-miR-16-2-3p=MI0000115

Quantile Normalized Counts

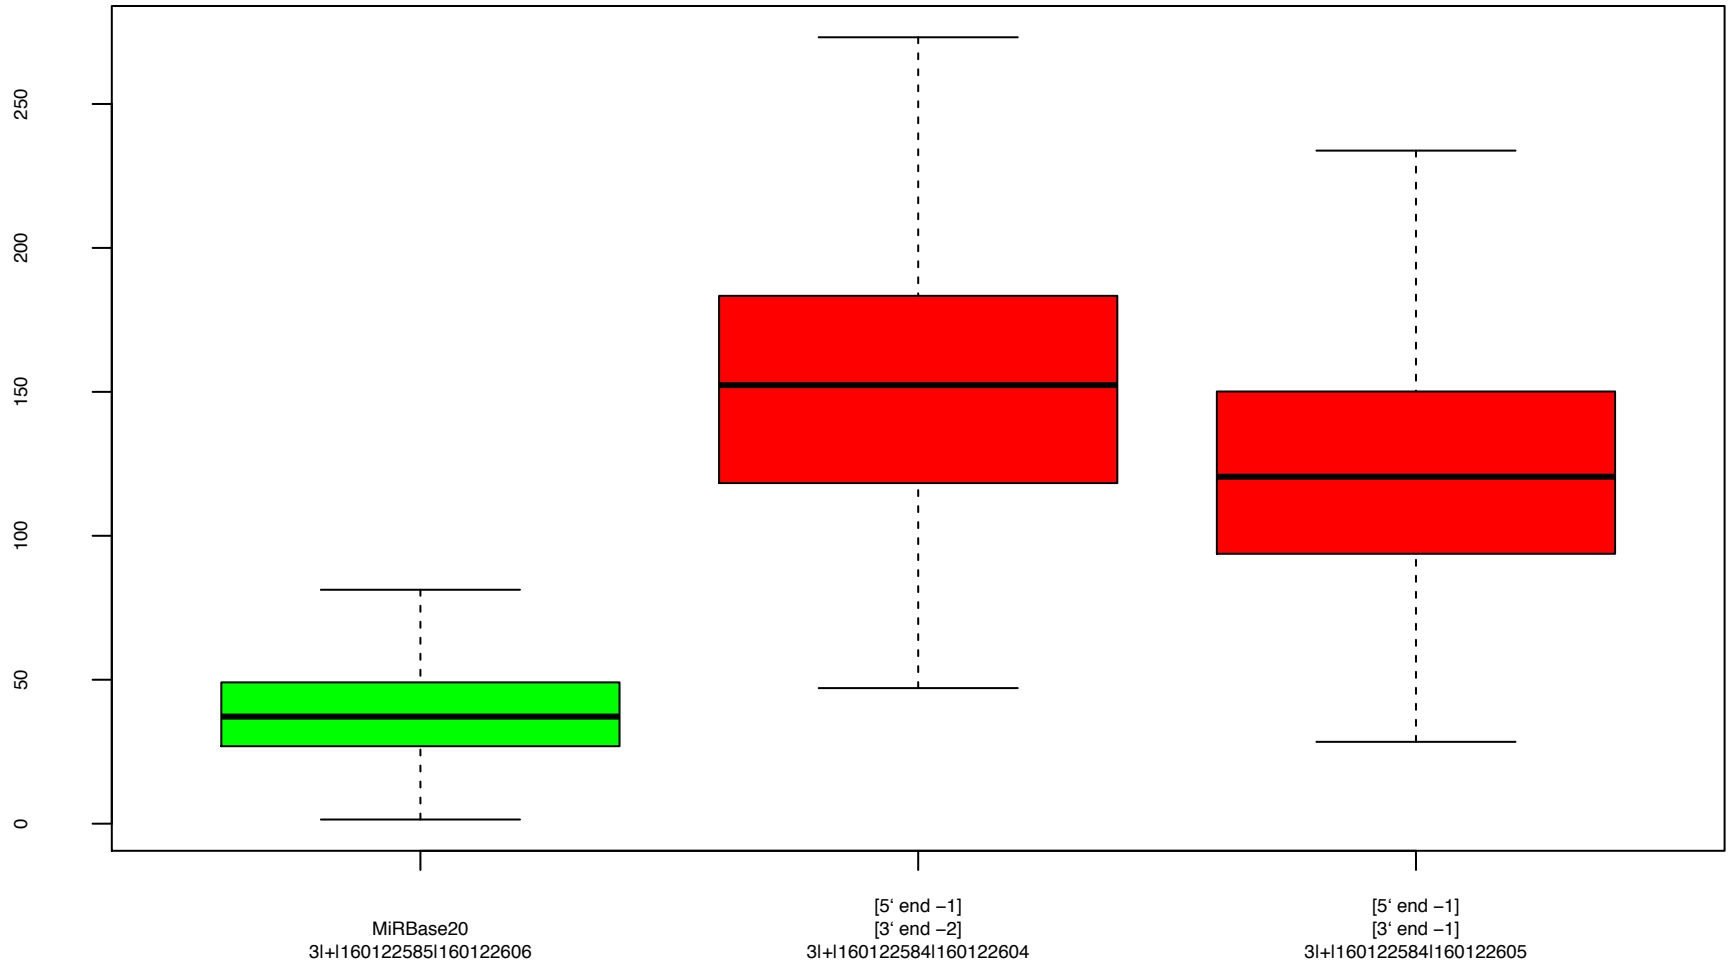

isomiRs



# MIMAT0000104=hsa-miR-107=MI0000114

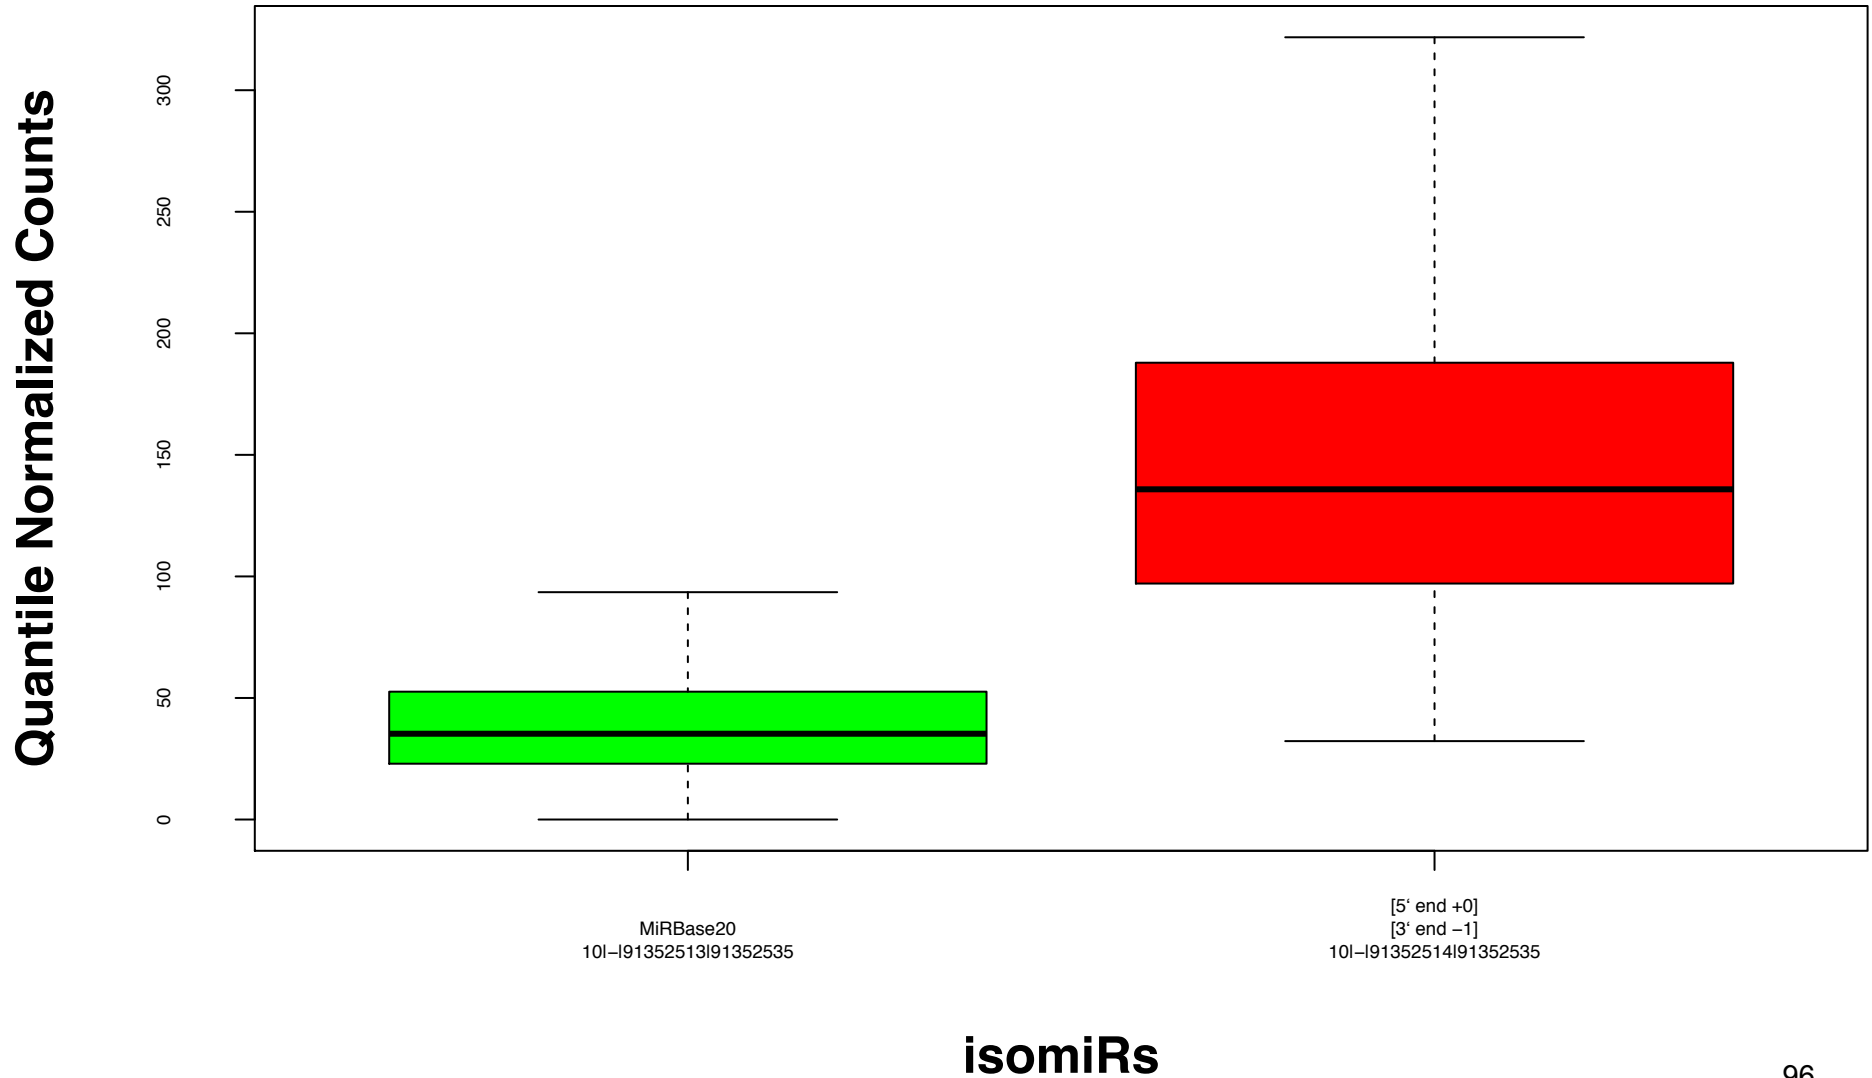

# MIMAT0000073=hsa-miR-19a-3p=MI0000073

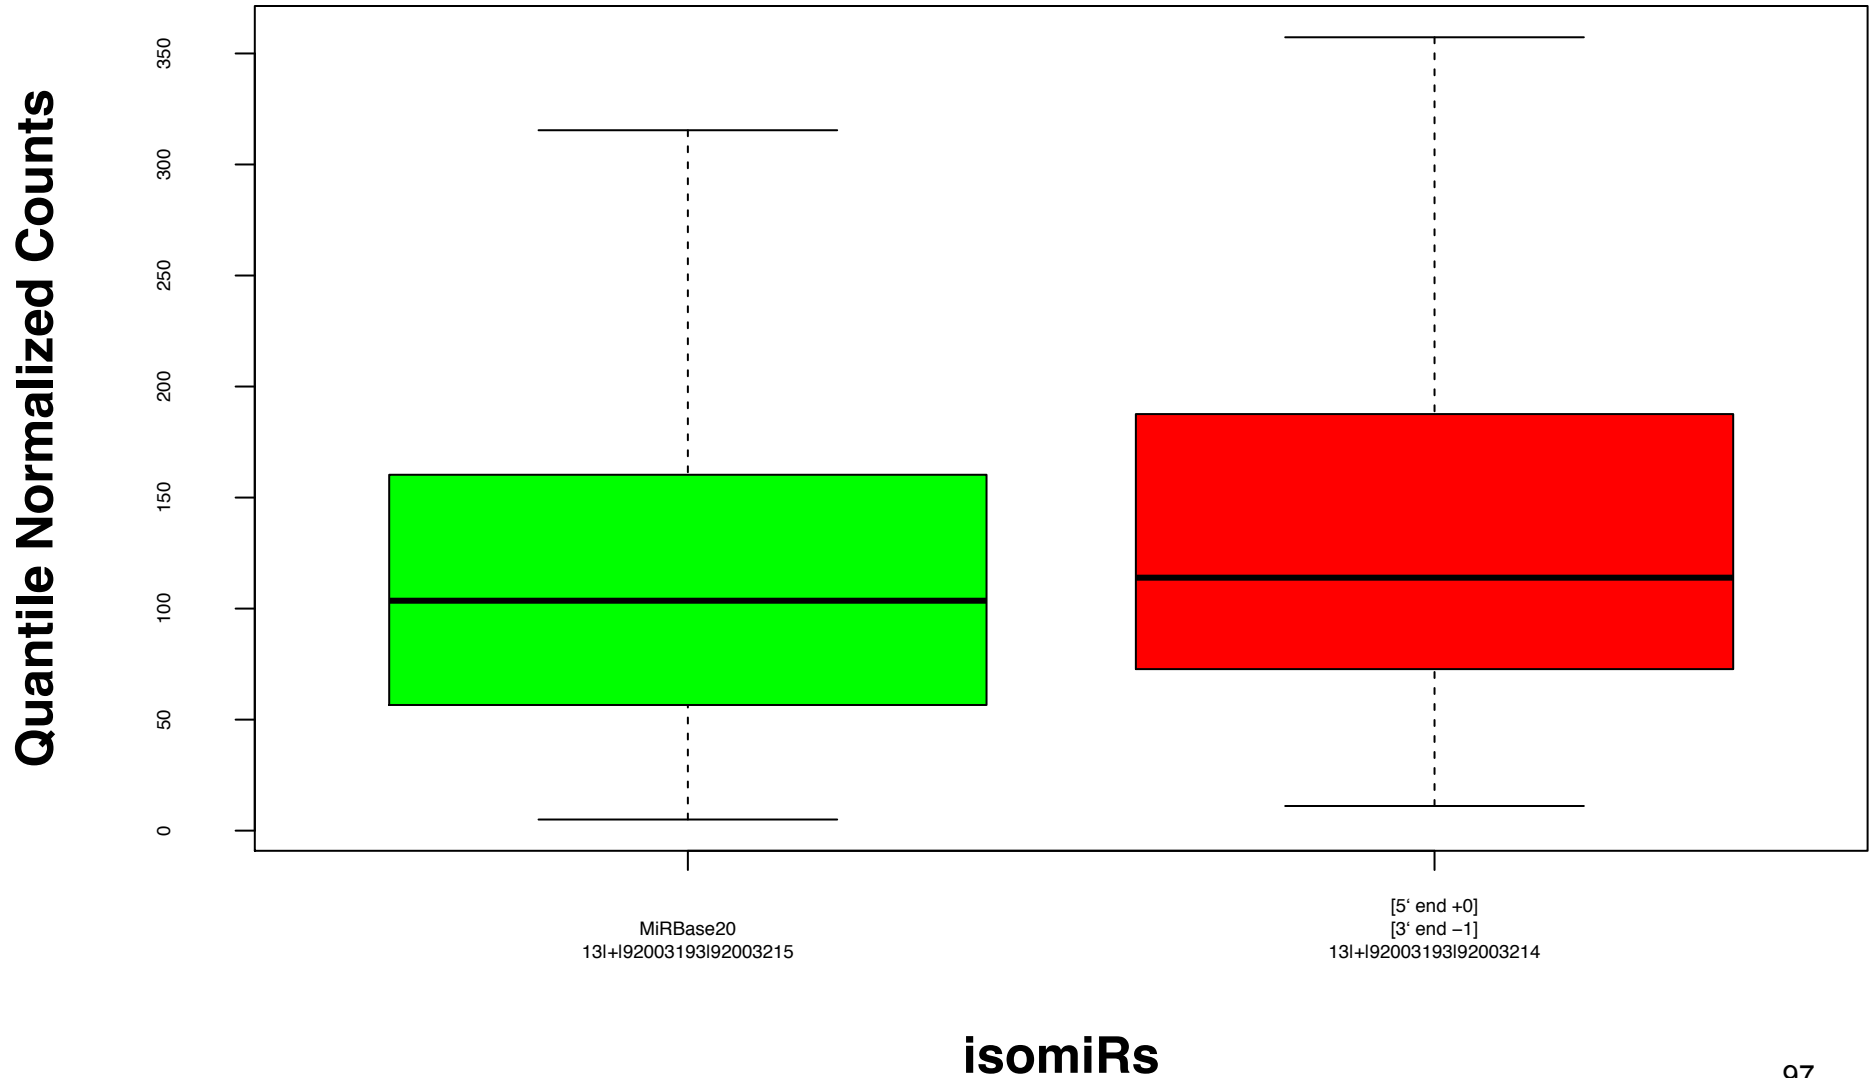

# MIMAT0005949=hsa-miR-664a-3p=MI0006442

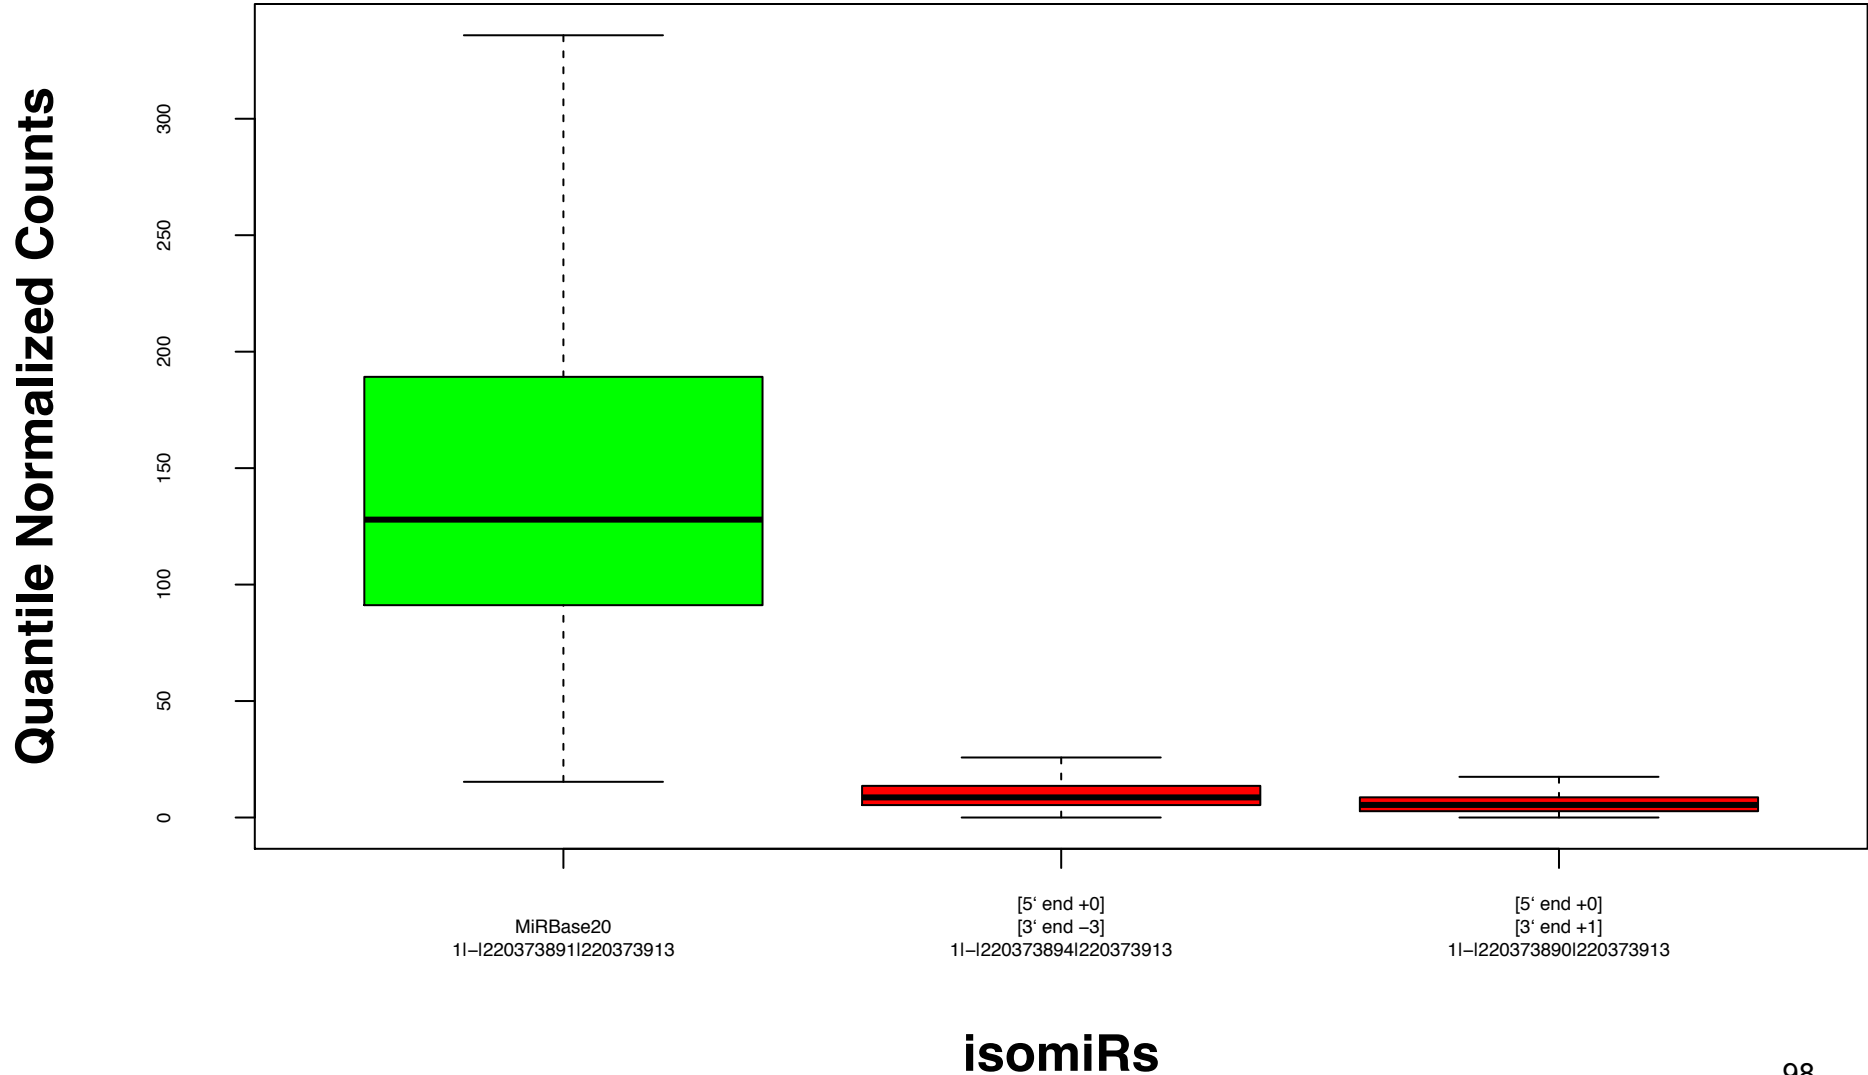

# MIMAT0027587=hsa-miR-6842-3p=MI0022688

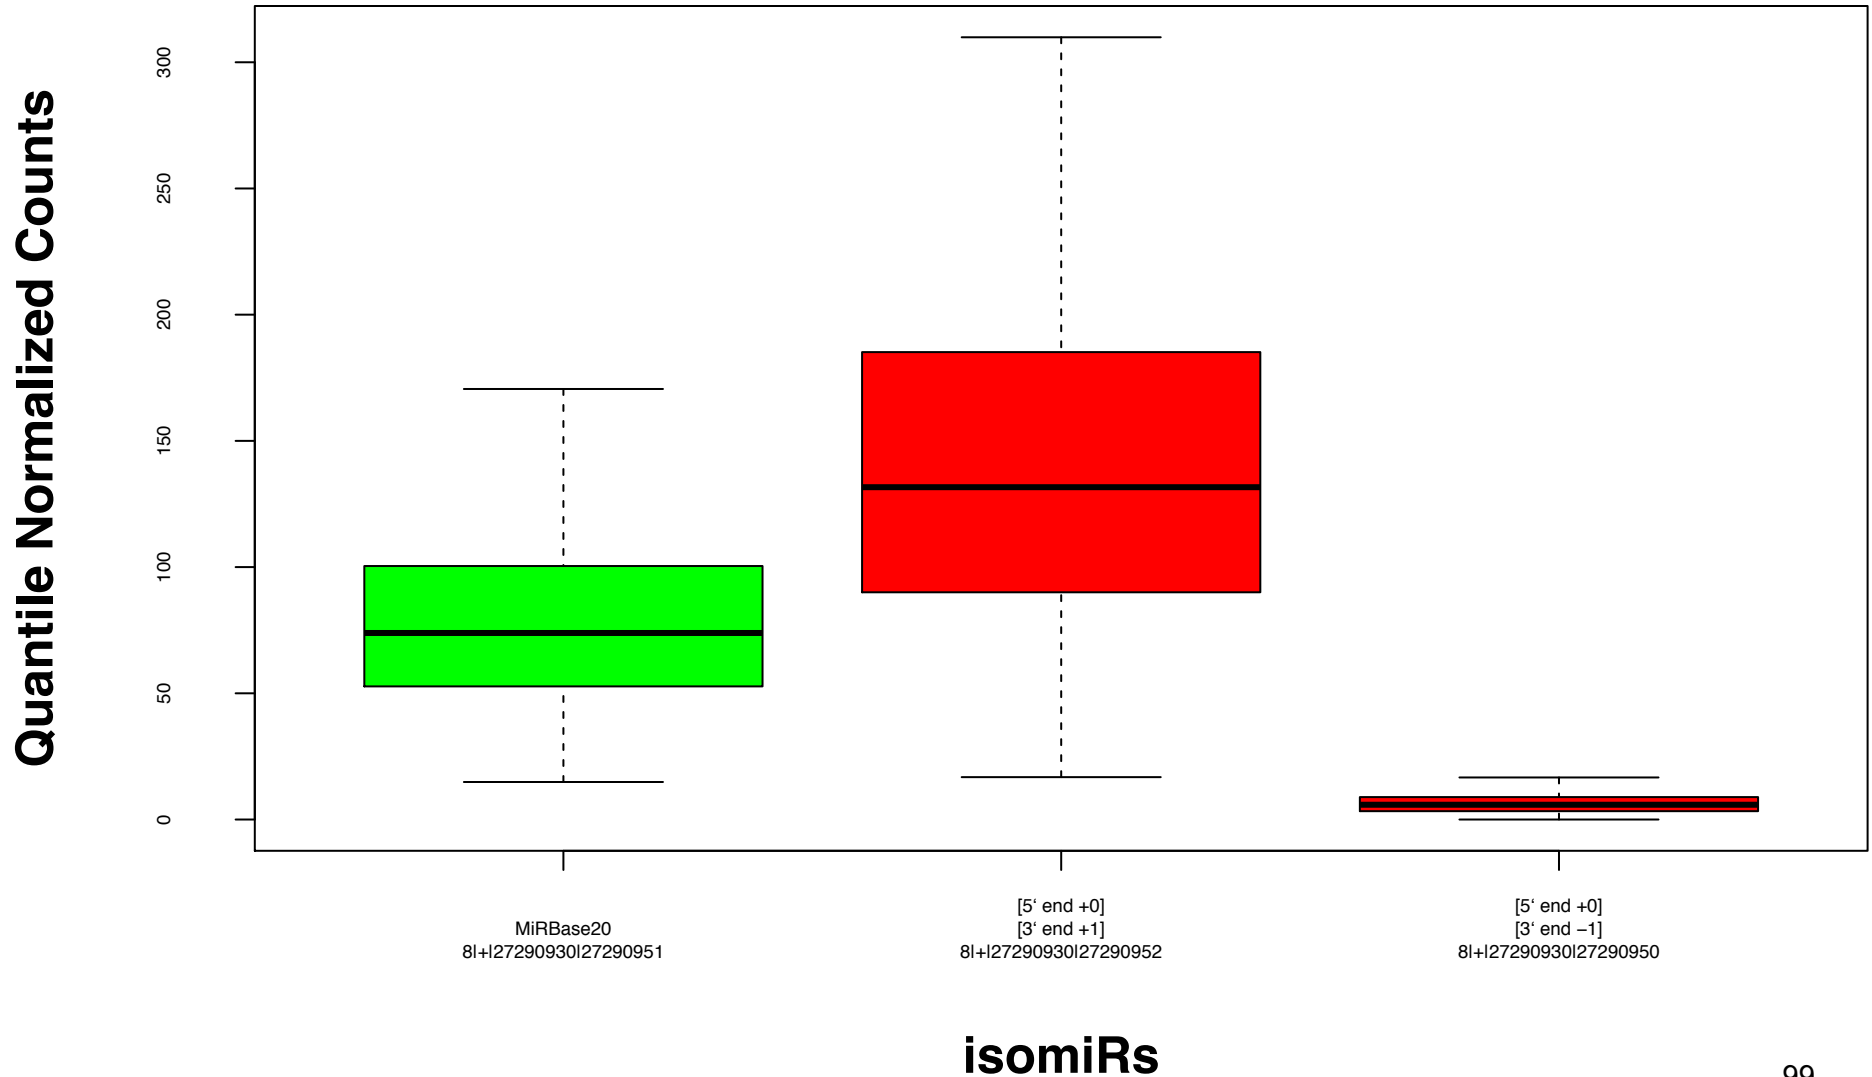

# MIMAT0004958=hsa-miR-301b=MI0005568

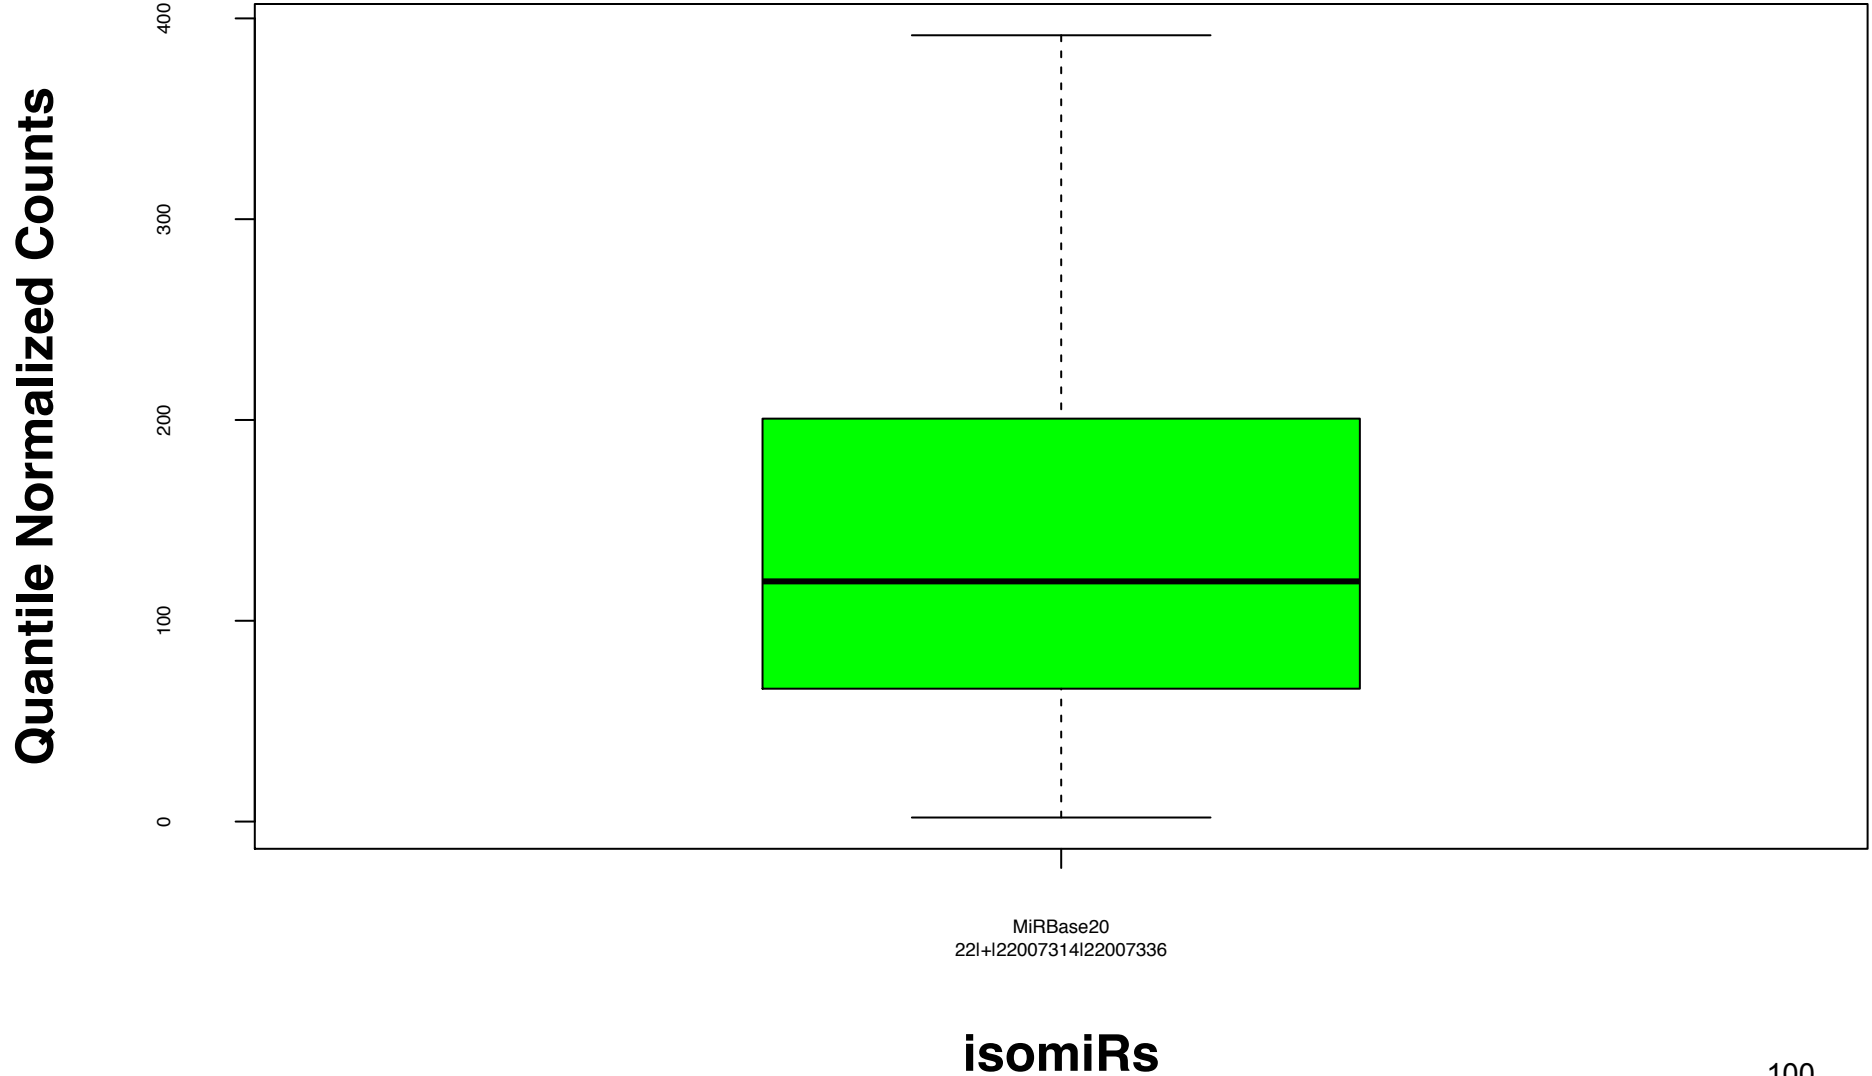

# MIMAT0003888=hsa-miR-766-3p=MI0003836

Quantile Normalized Counts

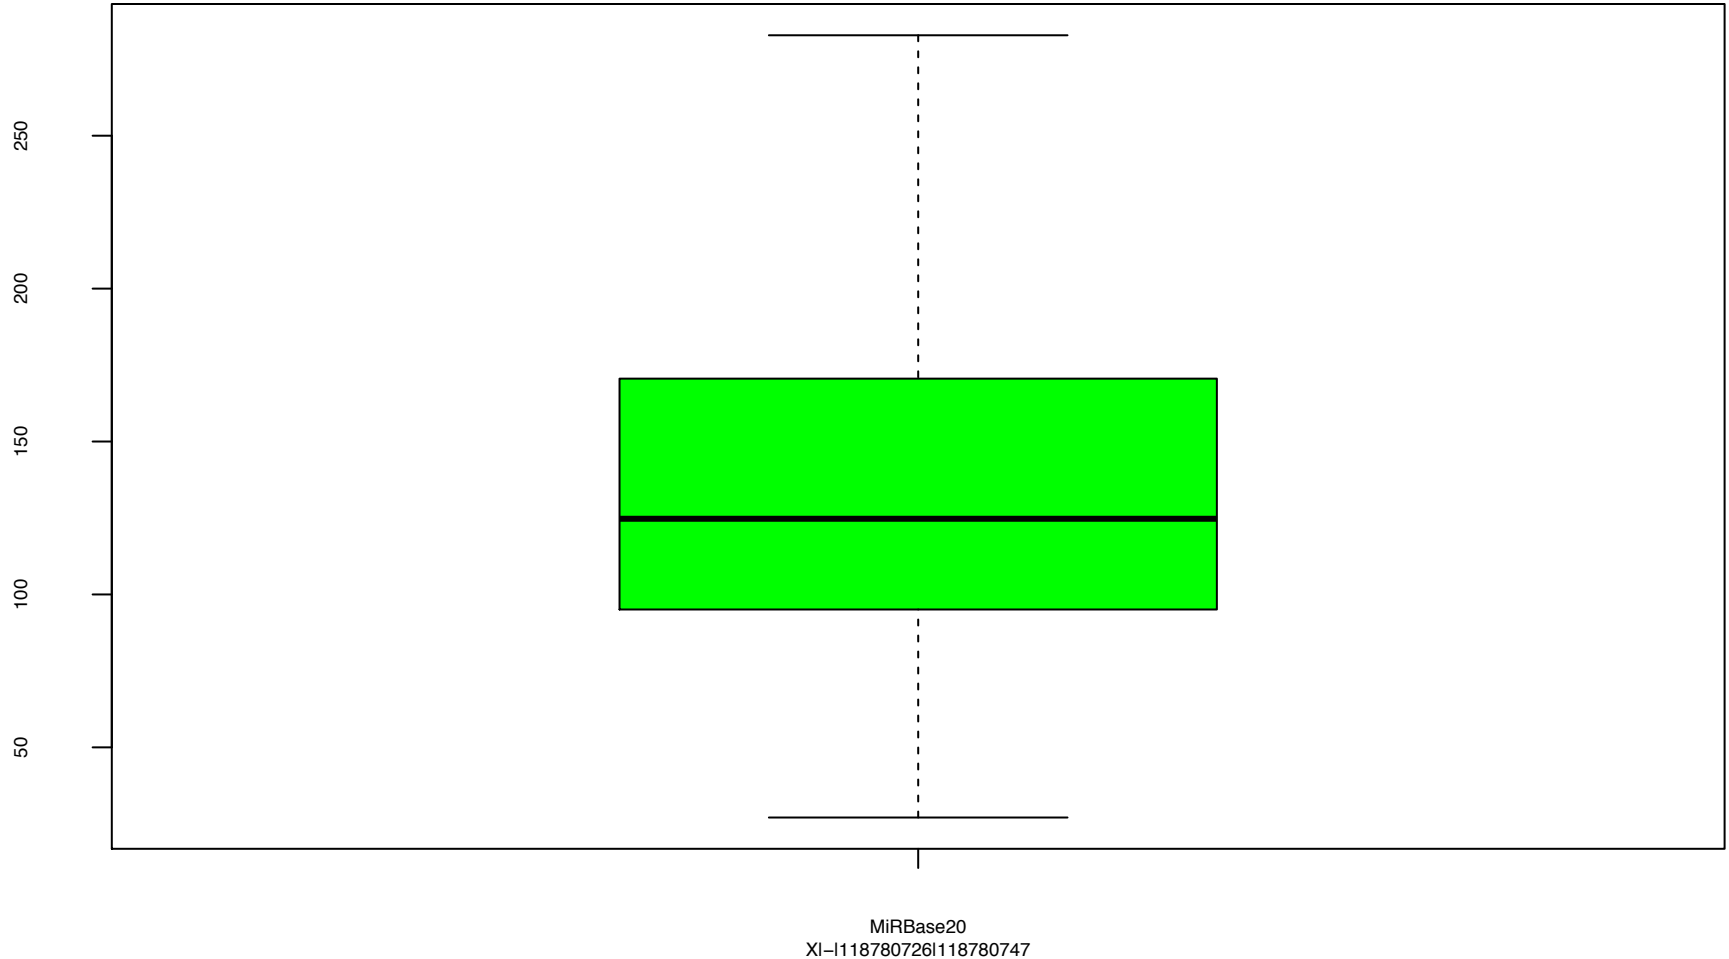

isomiRs

# MIMAT0004501=hsa-miR-27a-5p=MI0000085

Quantile Normalized Counts

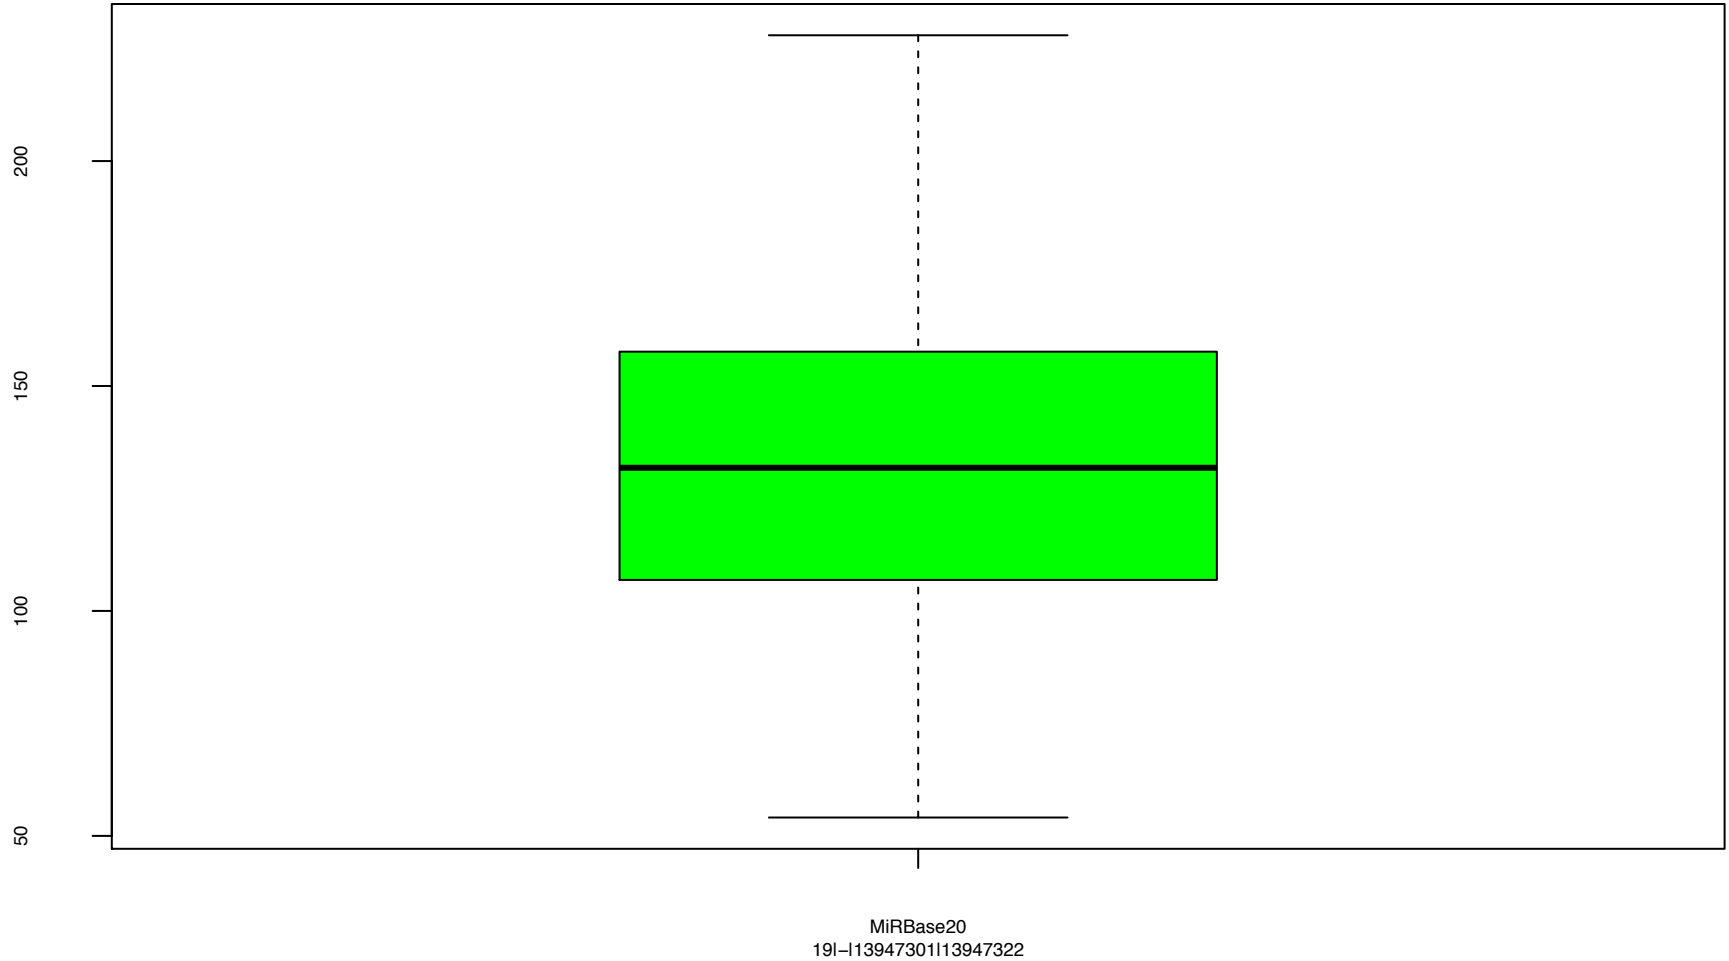

MiRBase20  
19l-113947301|113947322

isomiRs

# MIMAT0004507=hsa-miR-92a-1-5p=MI0000093

Quantile Normalized Counts

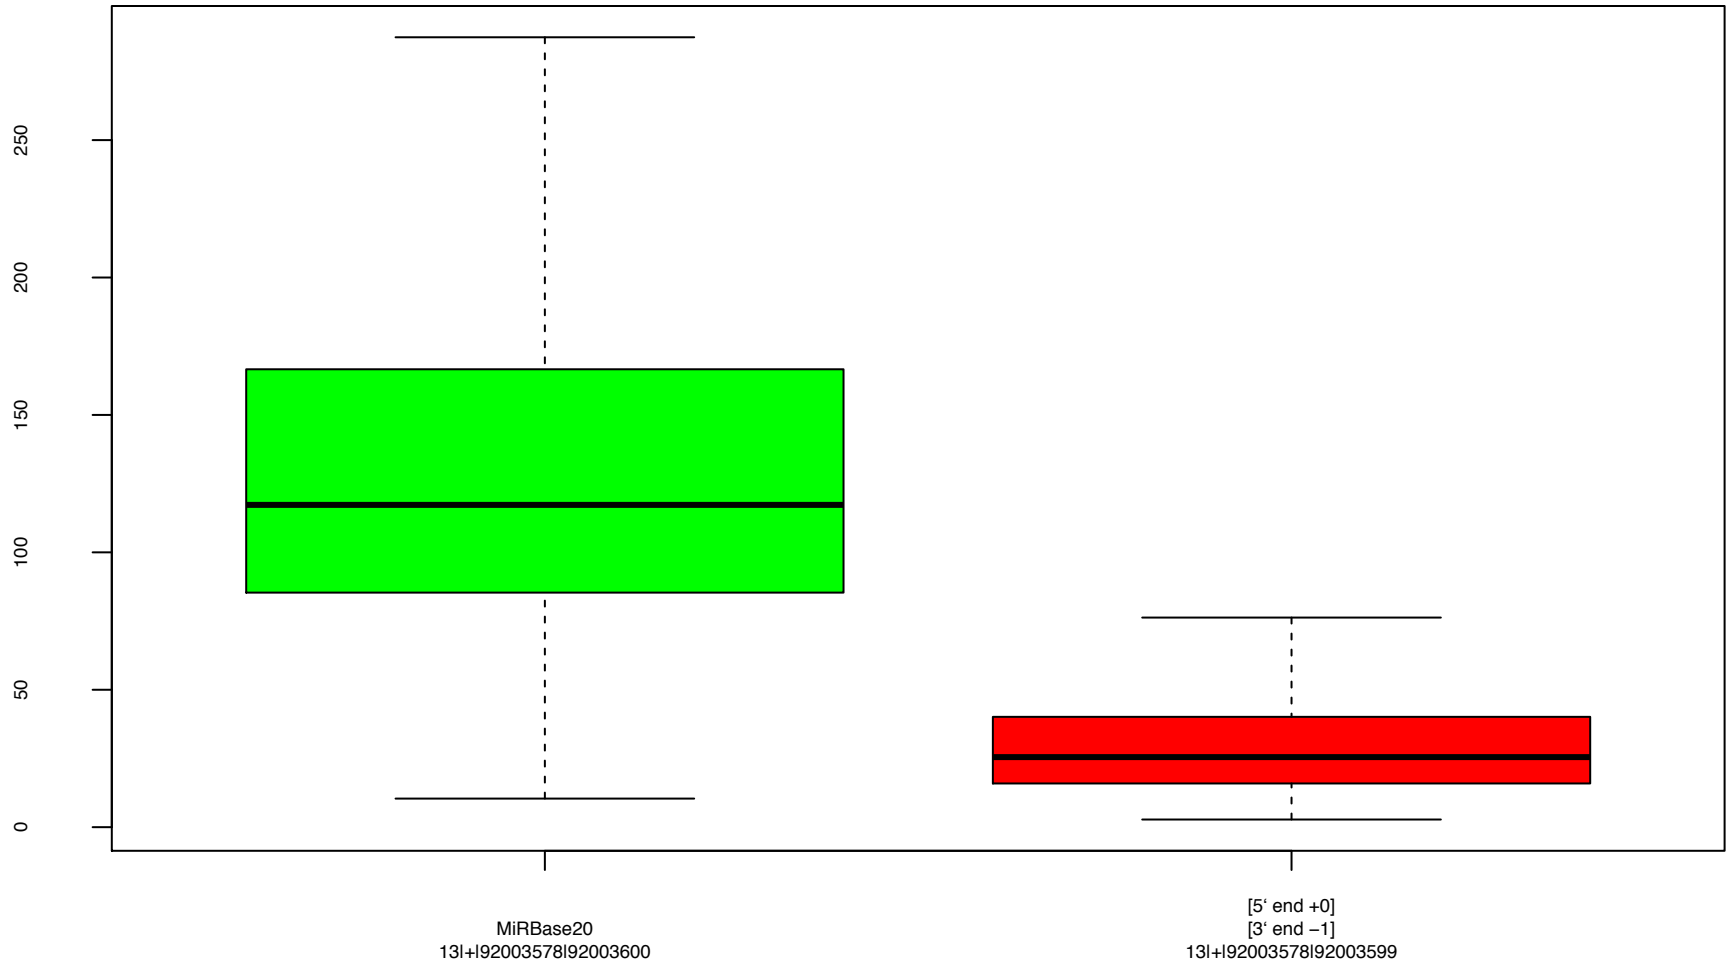

isomiRs



# MIMAT0003339=hsa-miR-421=MI0003685

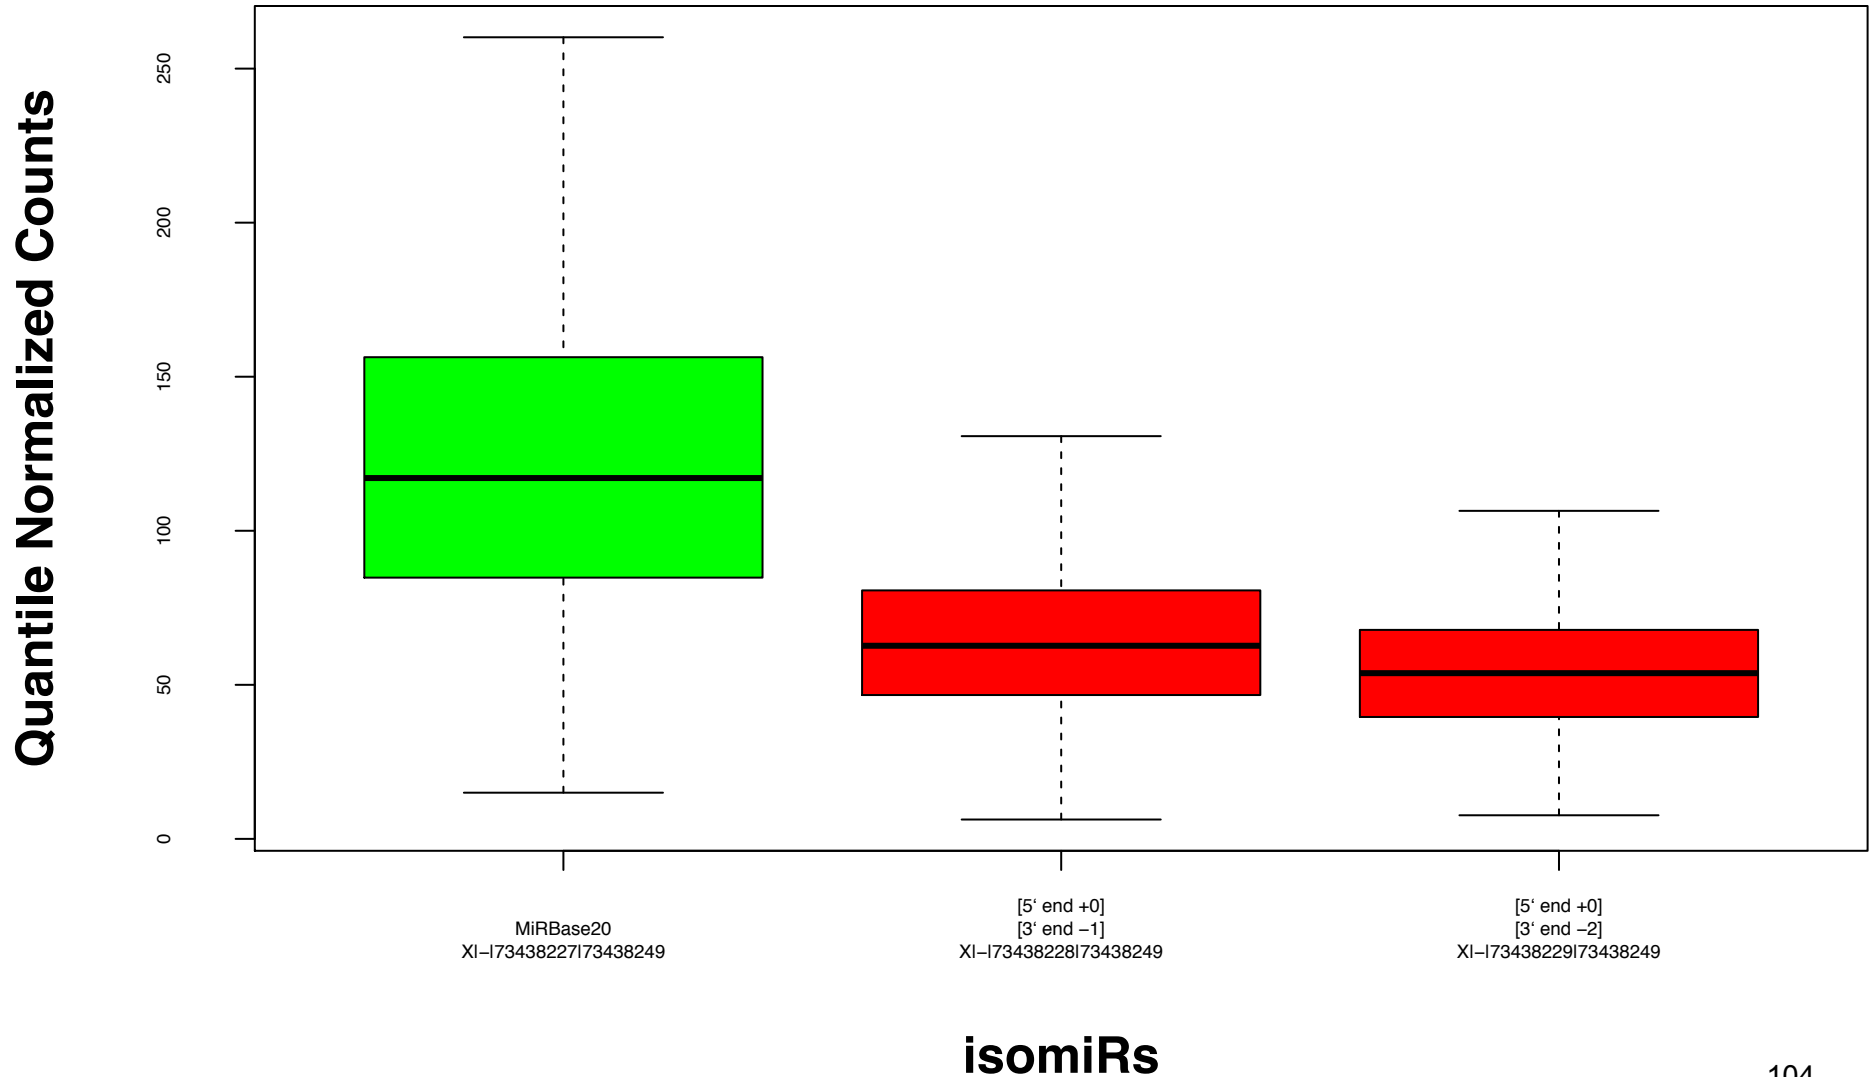

# MIMAT0004945=hsa-miR-744-5p=MI0005559

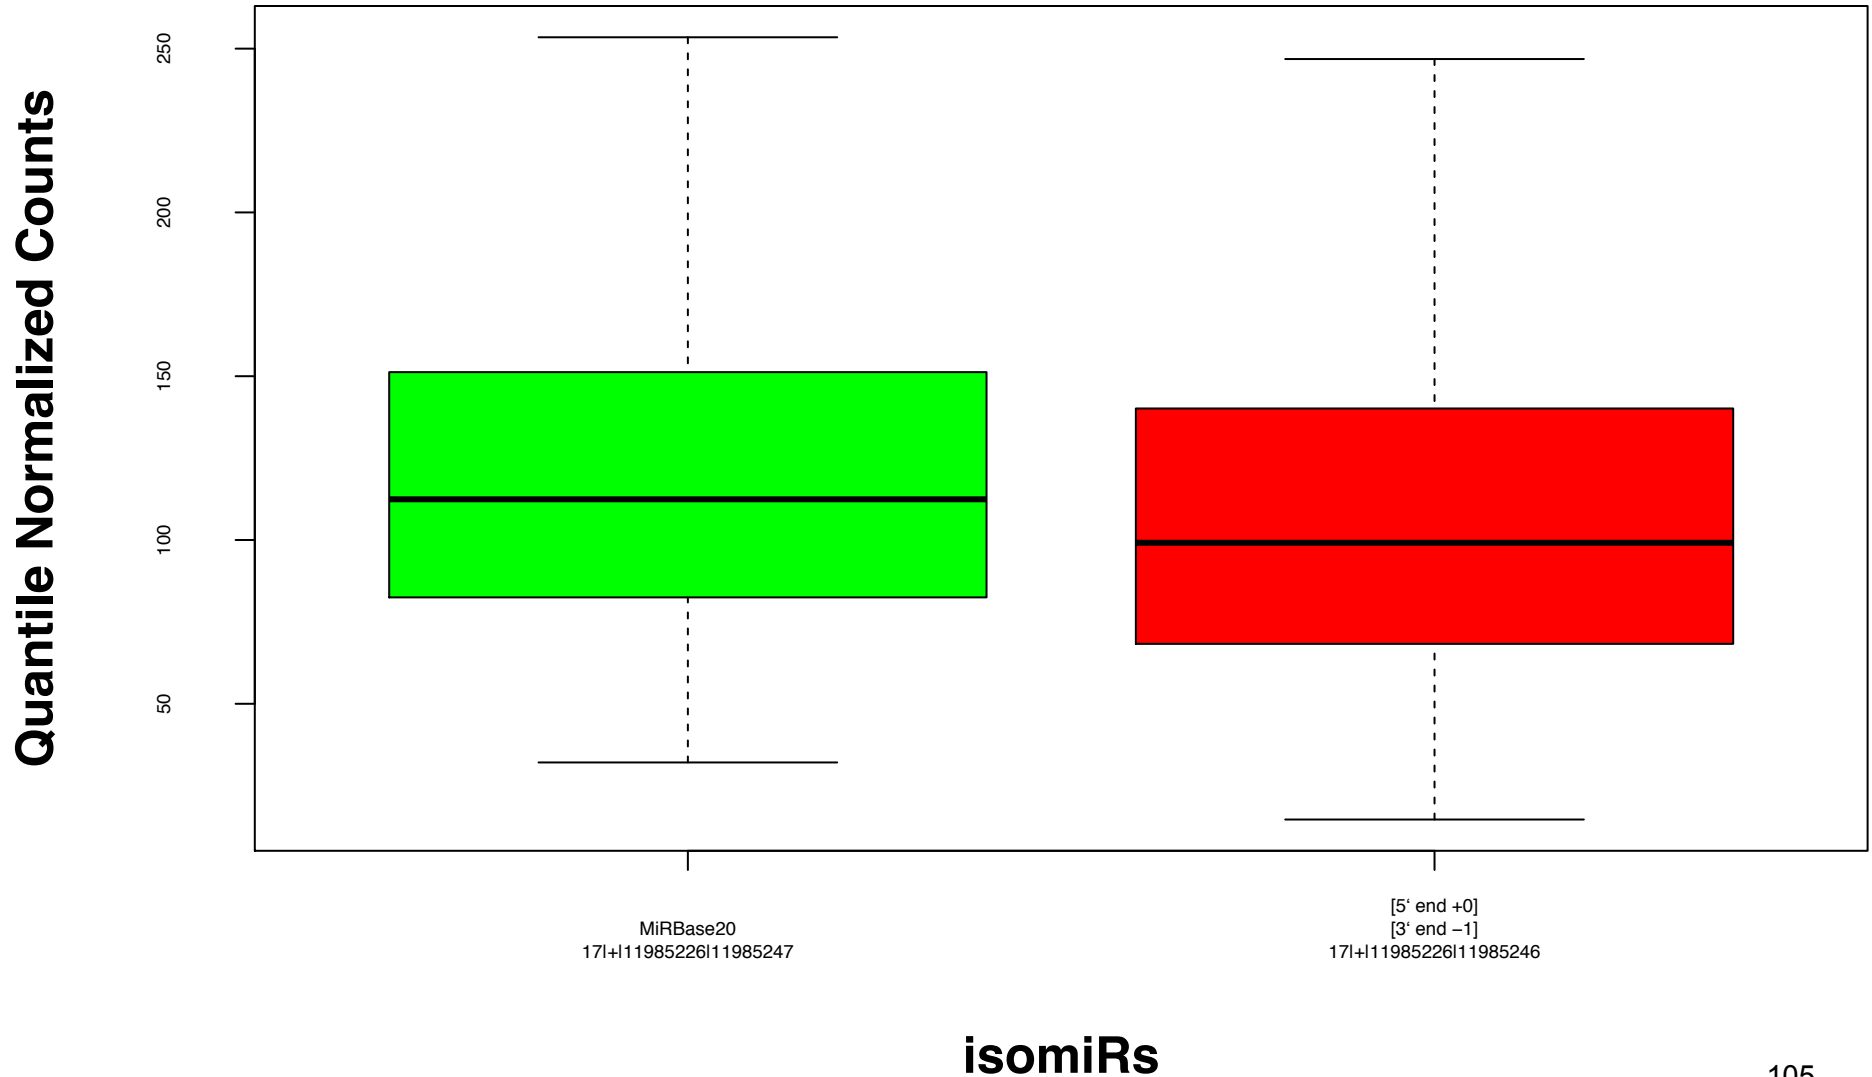

# MIMAT0004551=hsa-miR-30d-3p=MI0000255

Quantile Normalized Counts

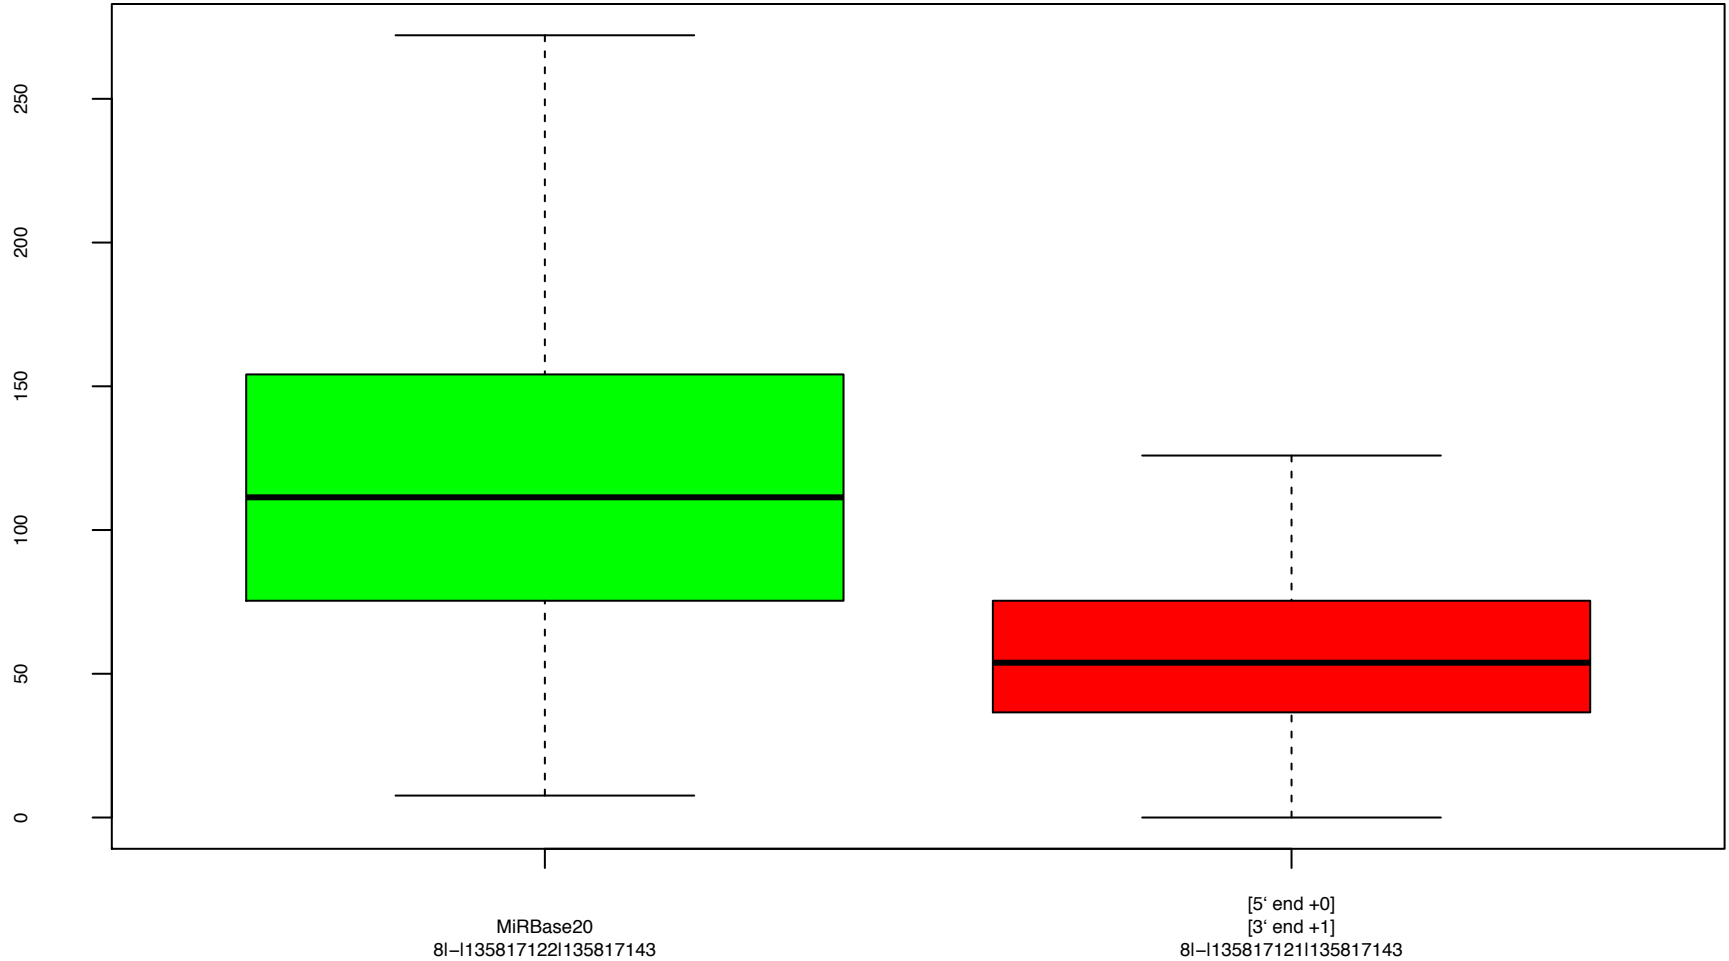

isomiRs

# MIMAT0000760=hsa-miR-331-3p=MI0000812

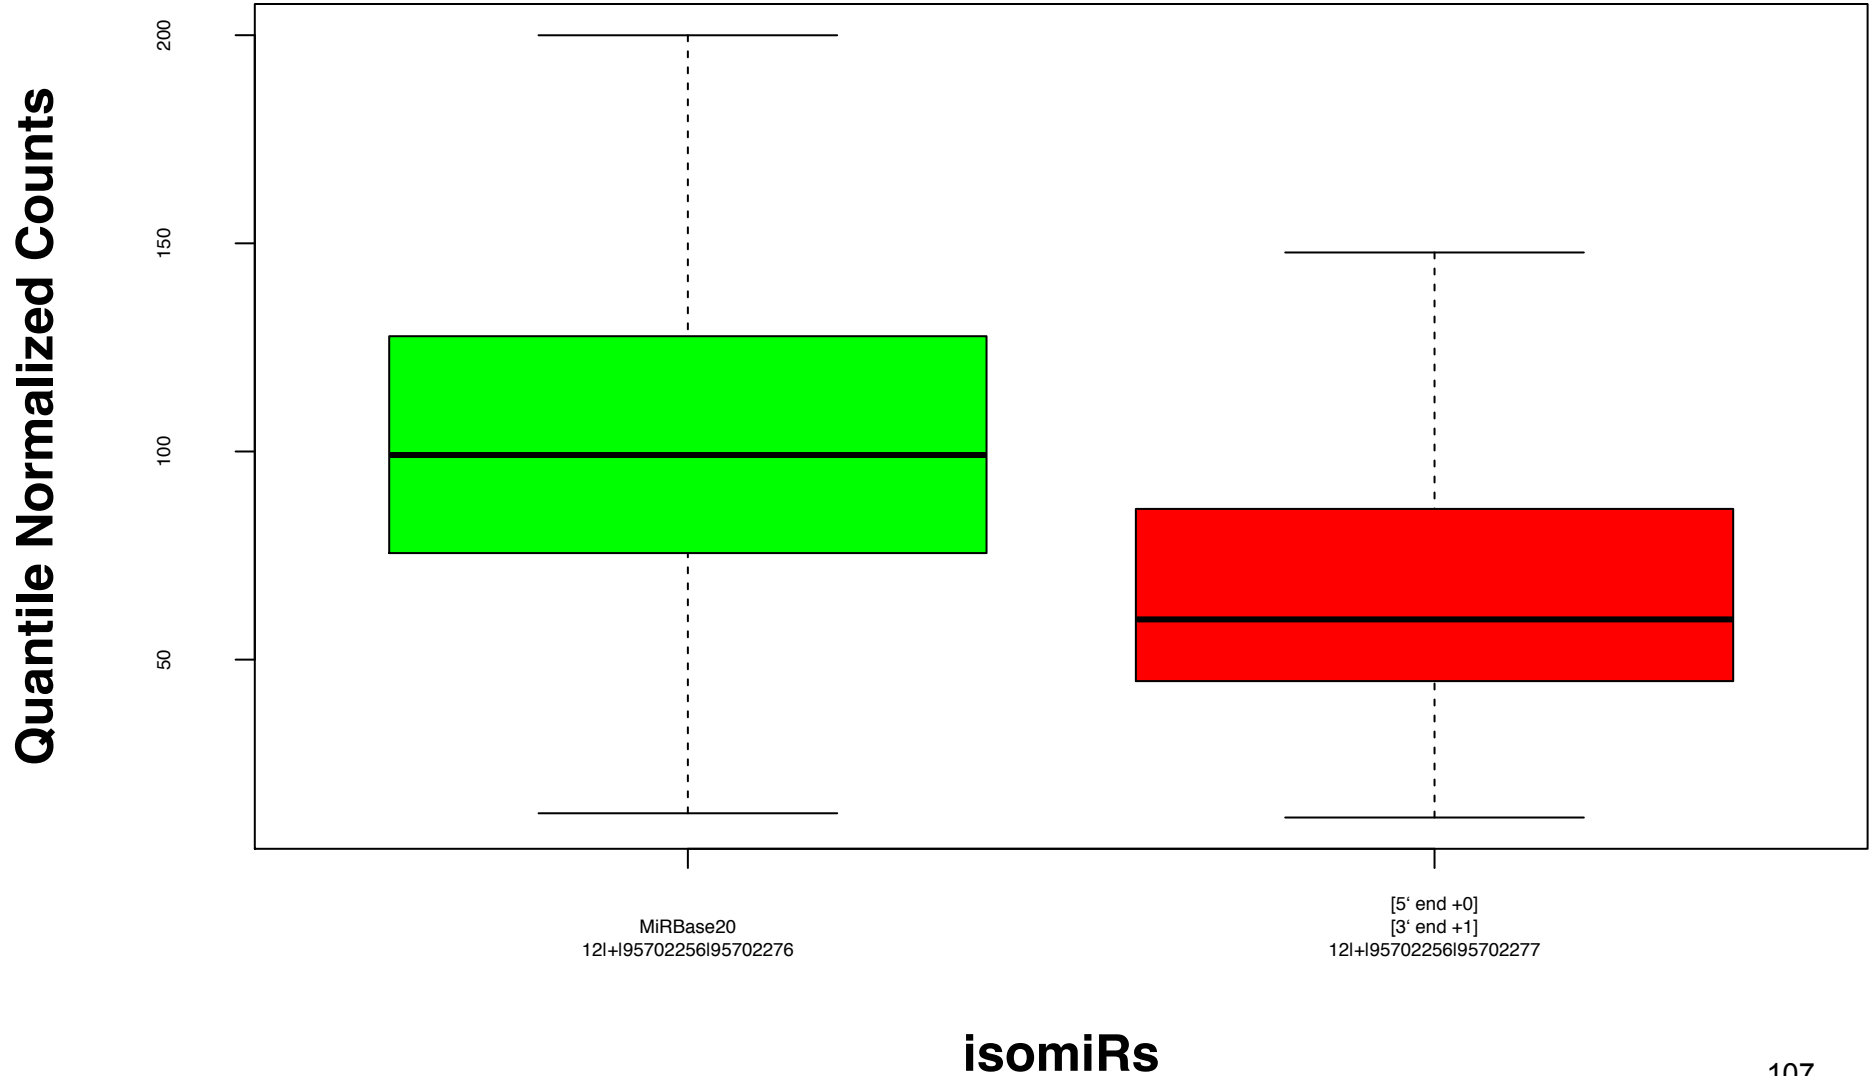

# MIMAT0003338=hsa-miR-660-5p=MI0003684

Quantile Normalized Counts

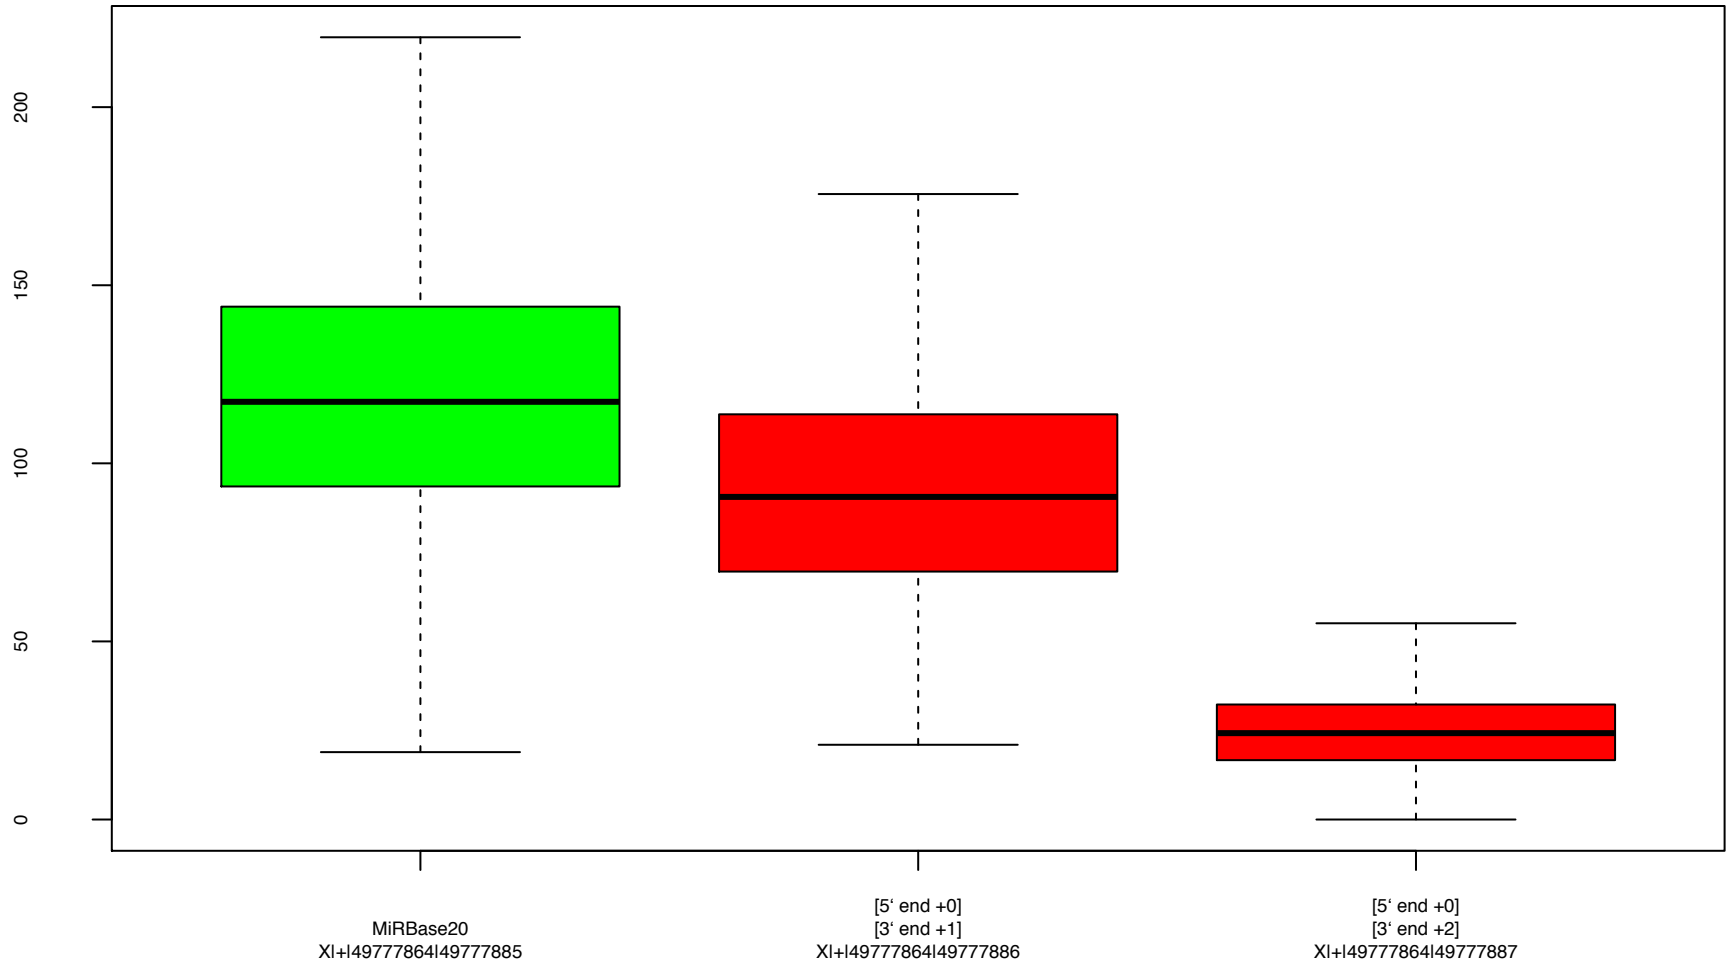

isomiRs

# MIMAT0004568=hsa-miR-221-5p=MI0000298

Quantile Normalized Counts

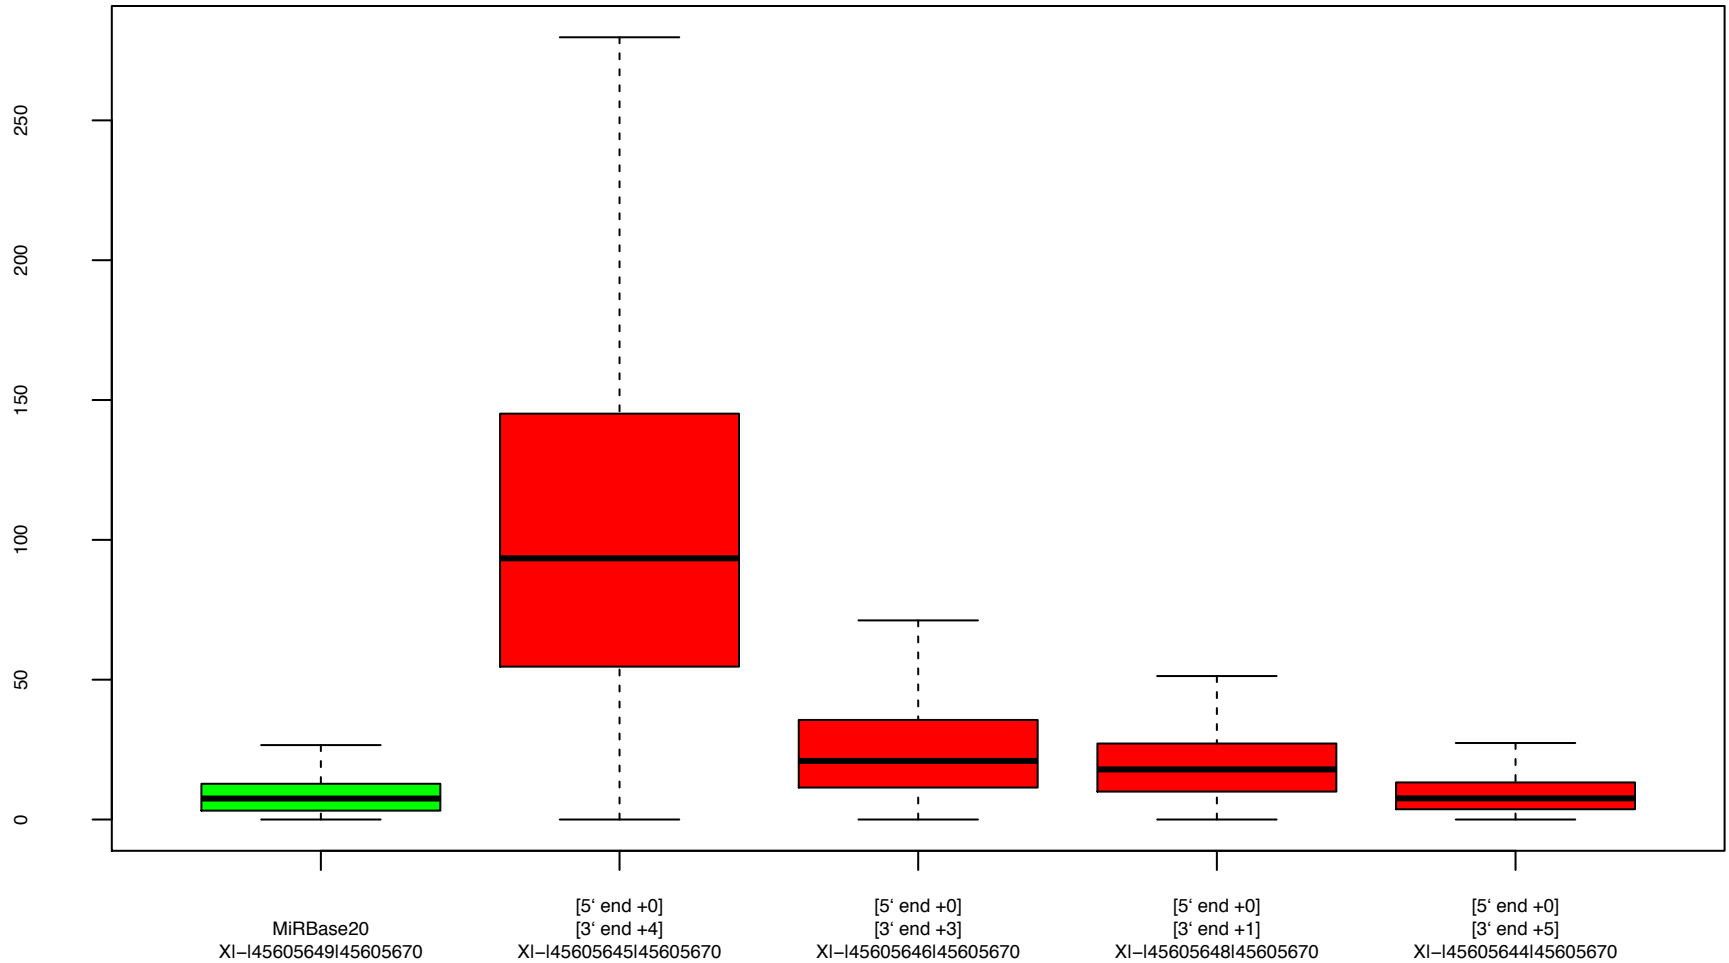

isomiRs

# MIMAT0004699=hsa-miR-148b-5p=MI0000811

Quantile Normalized Counts

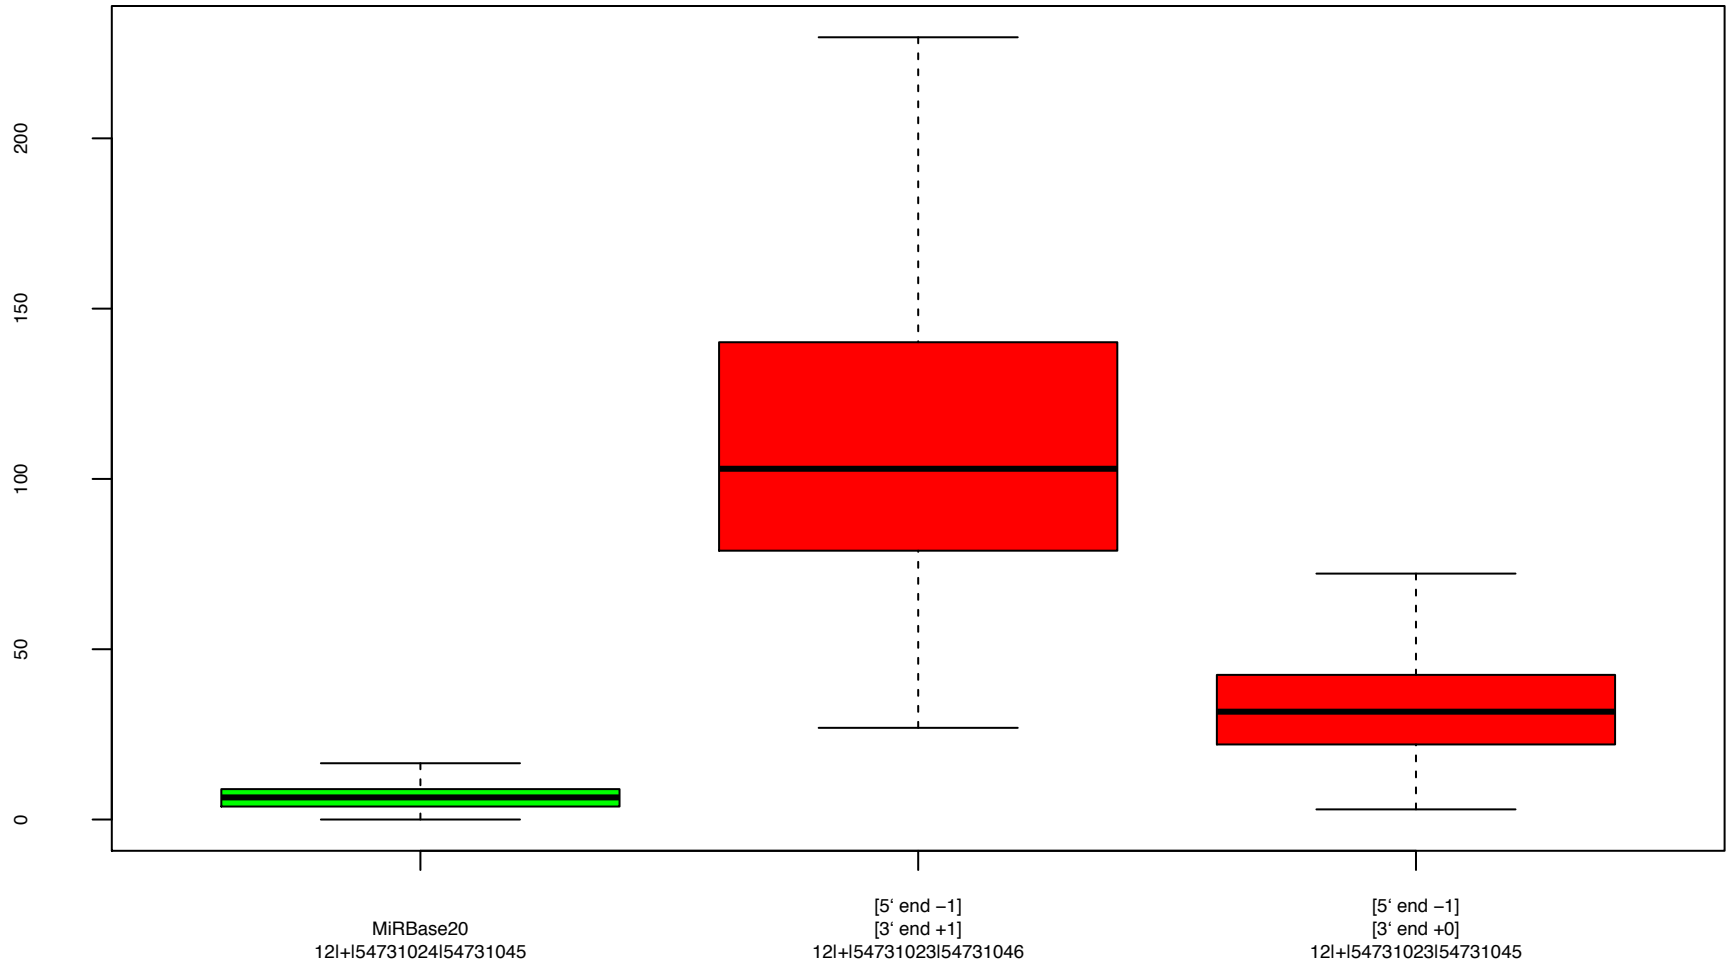

isomiRs

# MIMAT0000067=hsa-let-7f-5p=MI0000067

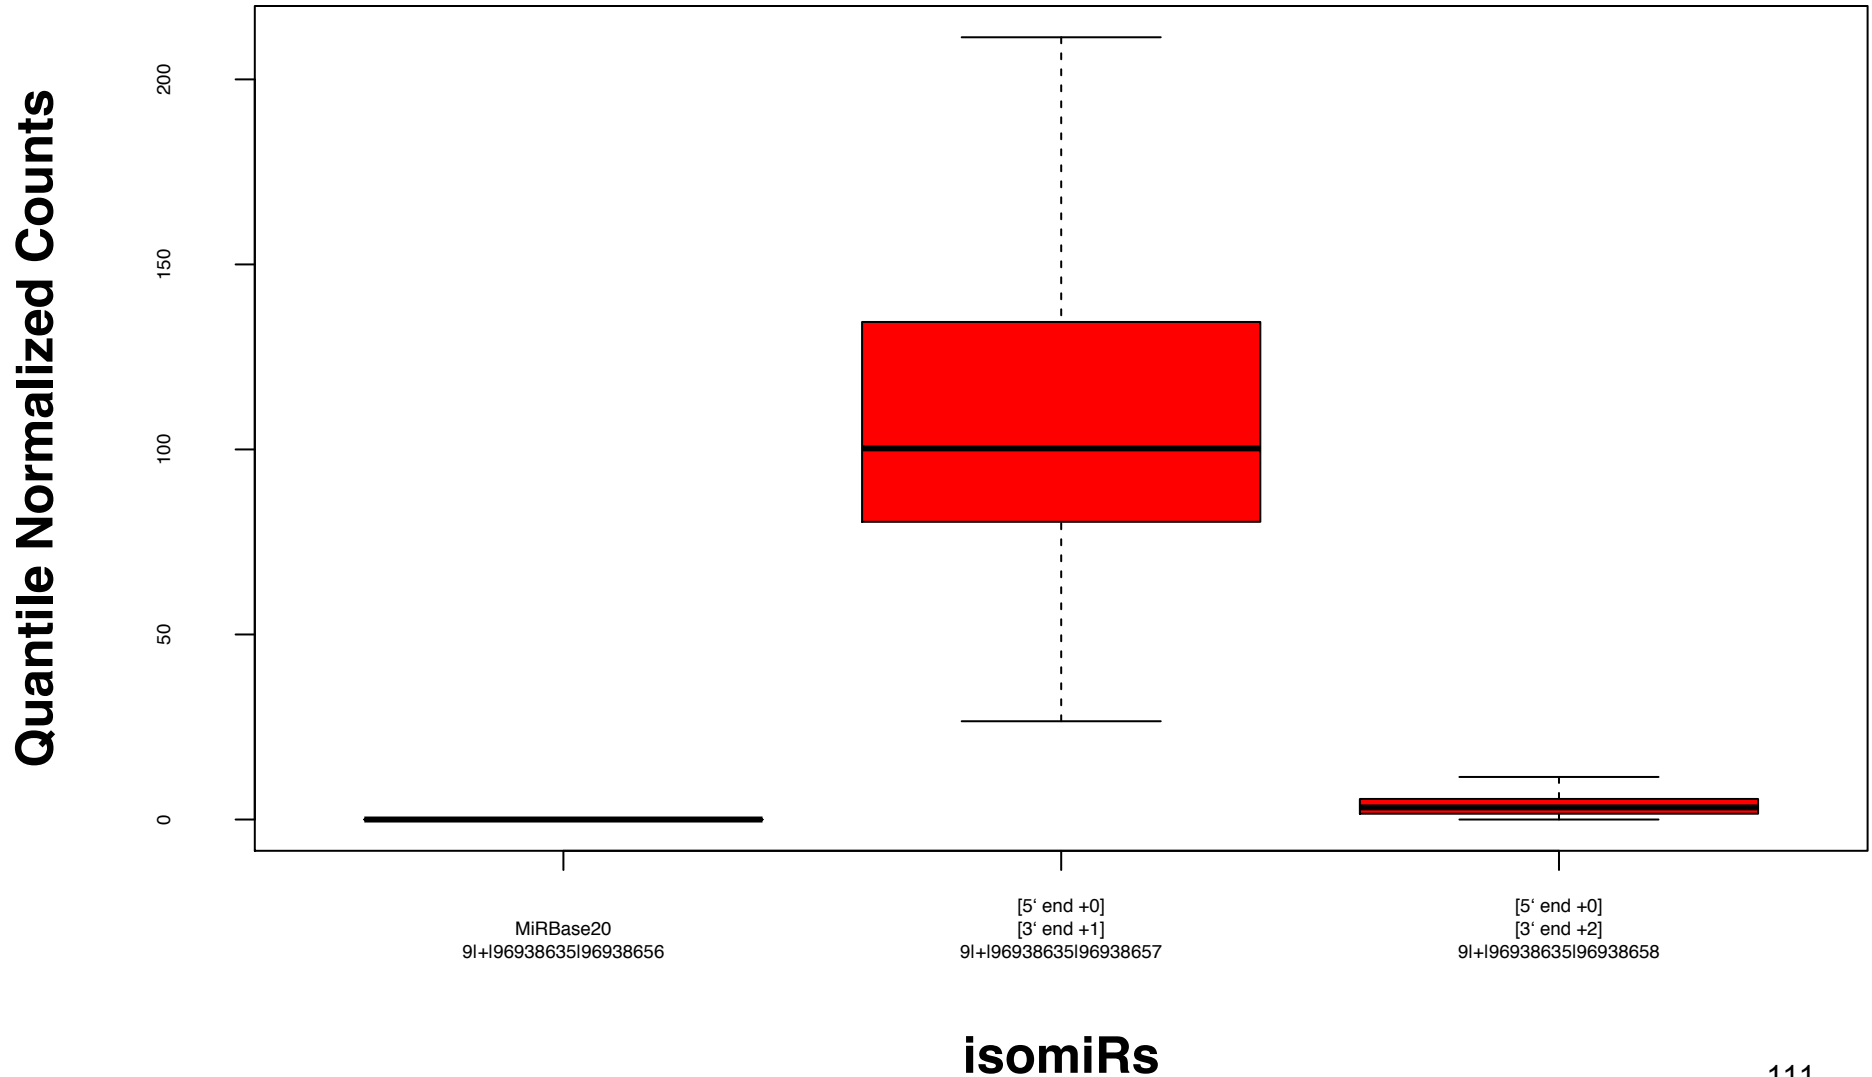



# MIMAT0004703=hsa-miR-335-3p=MI0000816

Quantile Normalized Counts

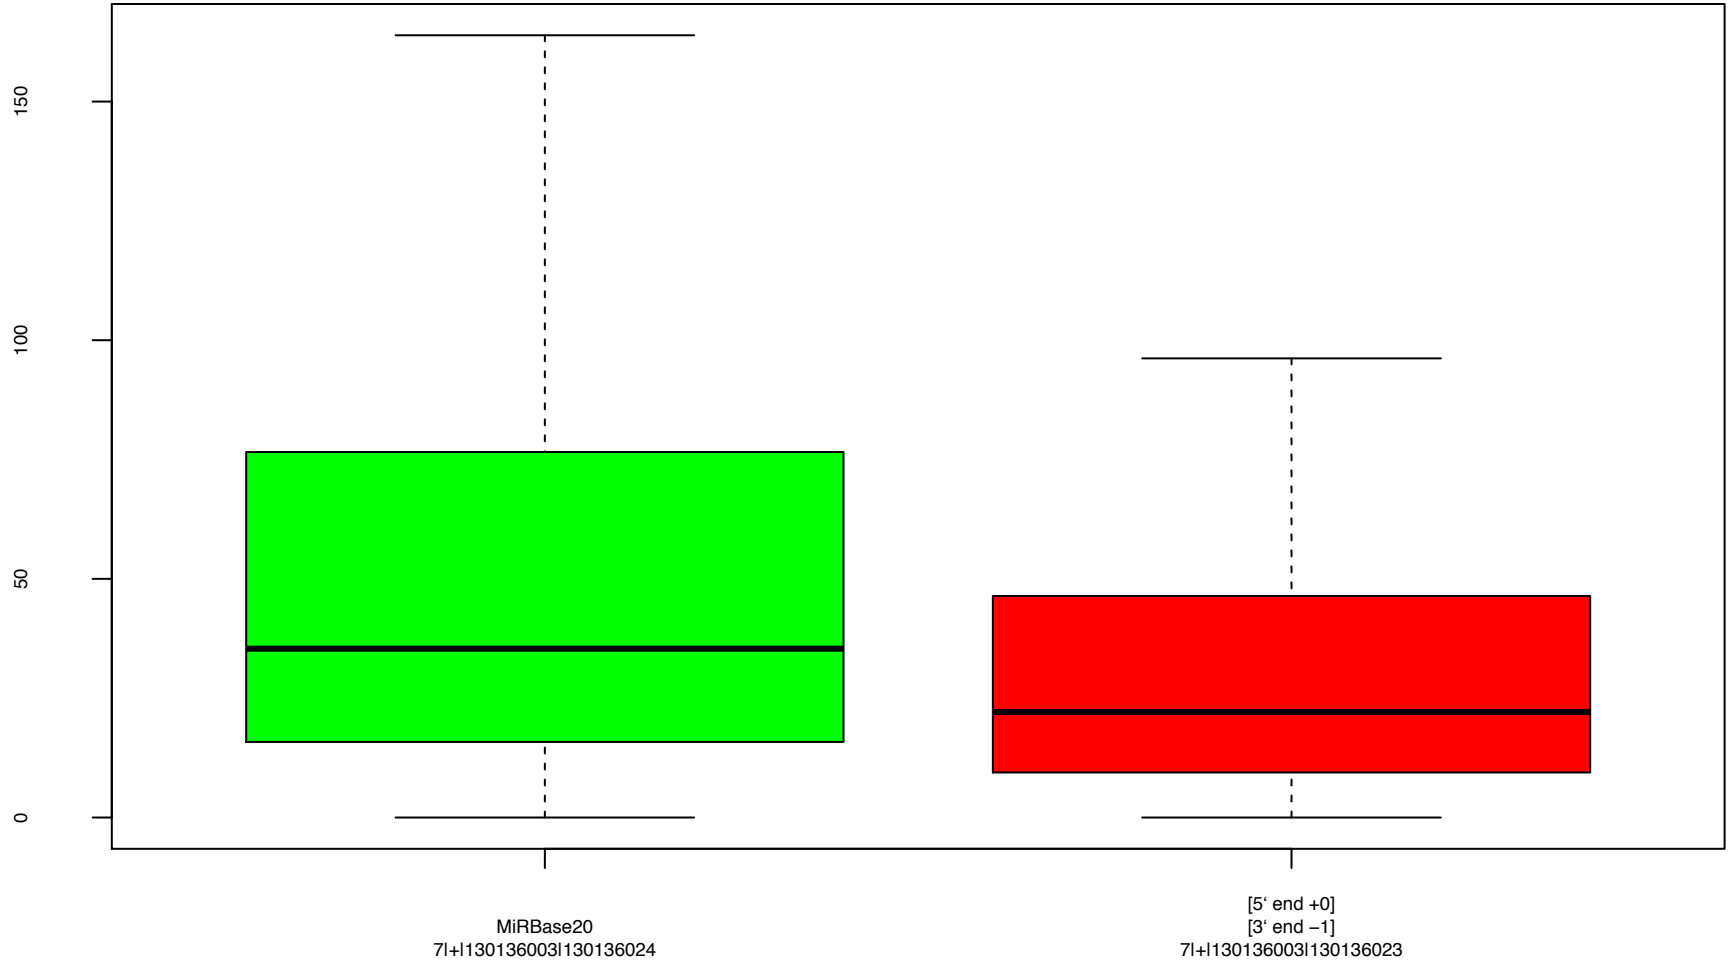

isomiRs

# MIMAT0000254=hsa-miR-10b-5p=MI0000267

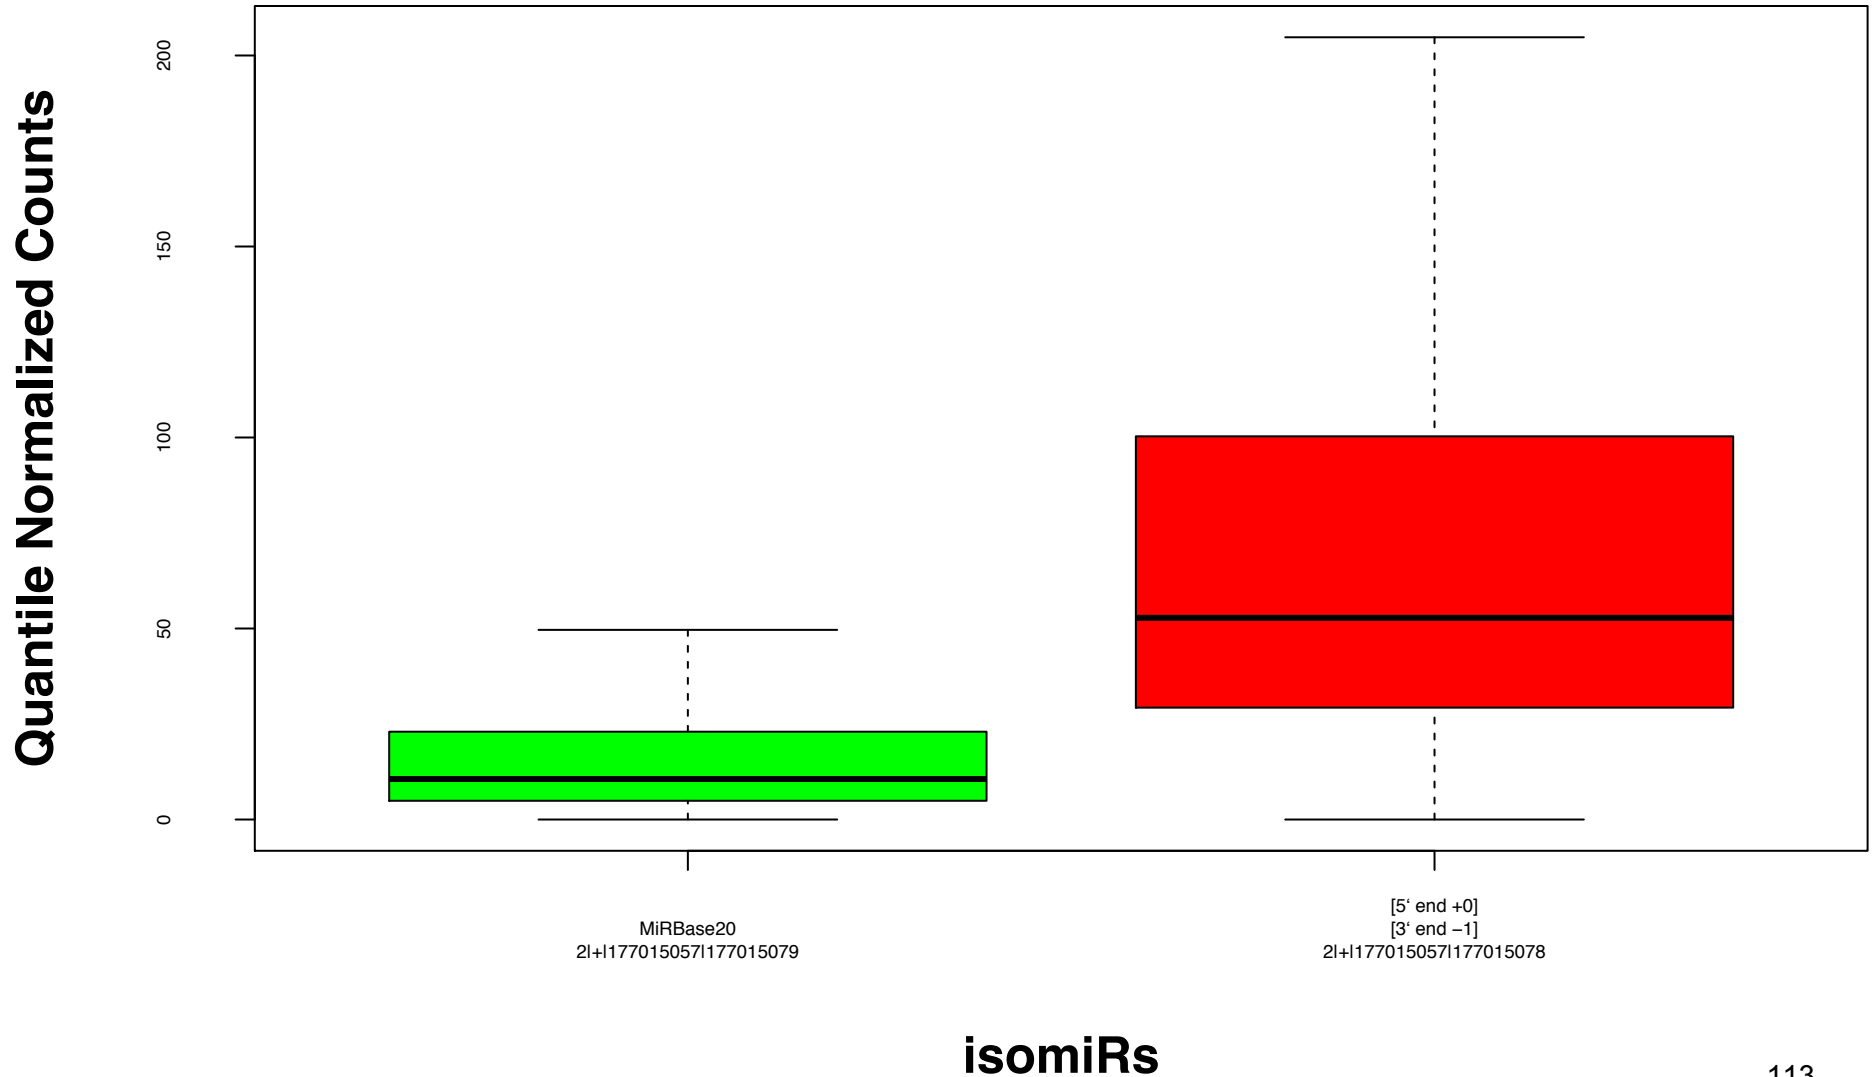

# MIMAT0004658=hsa-miR-155-3p=MI0000681

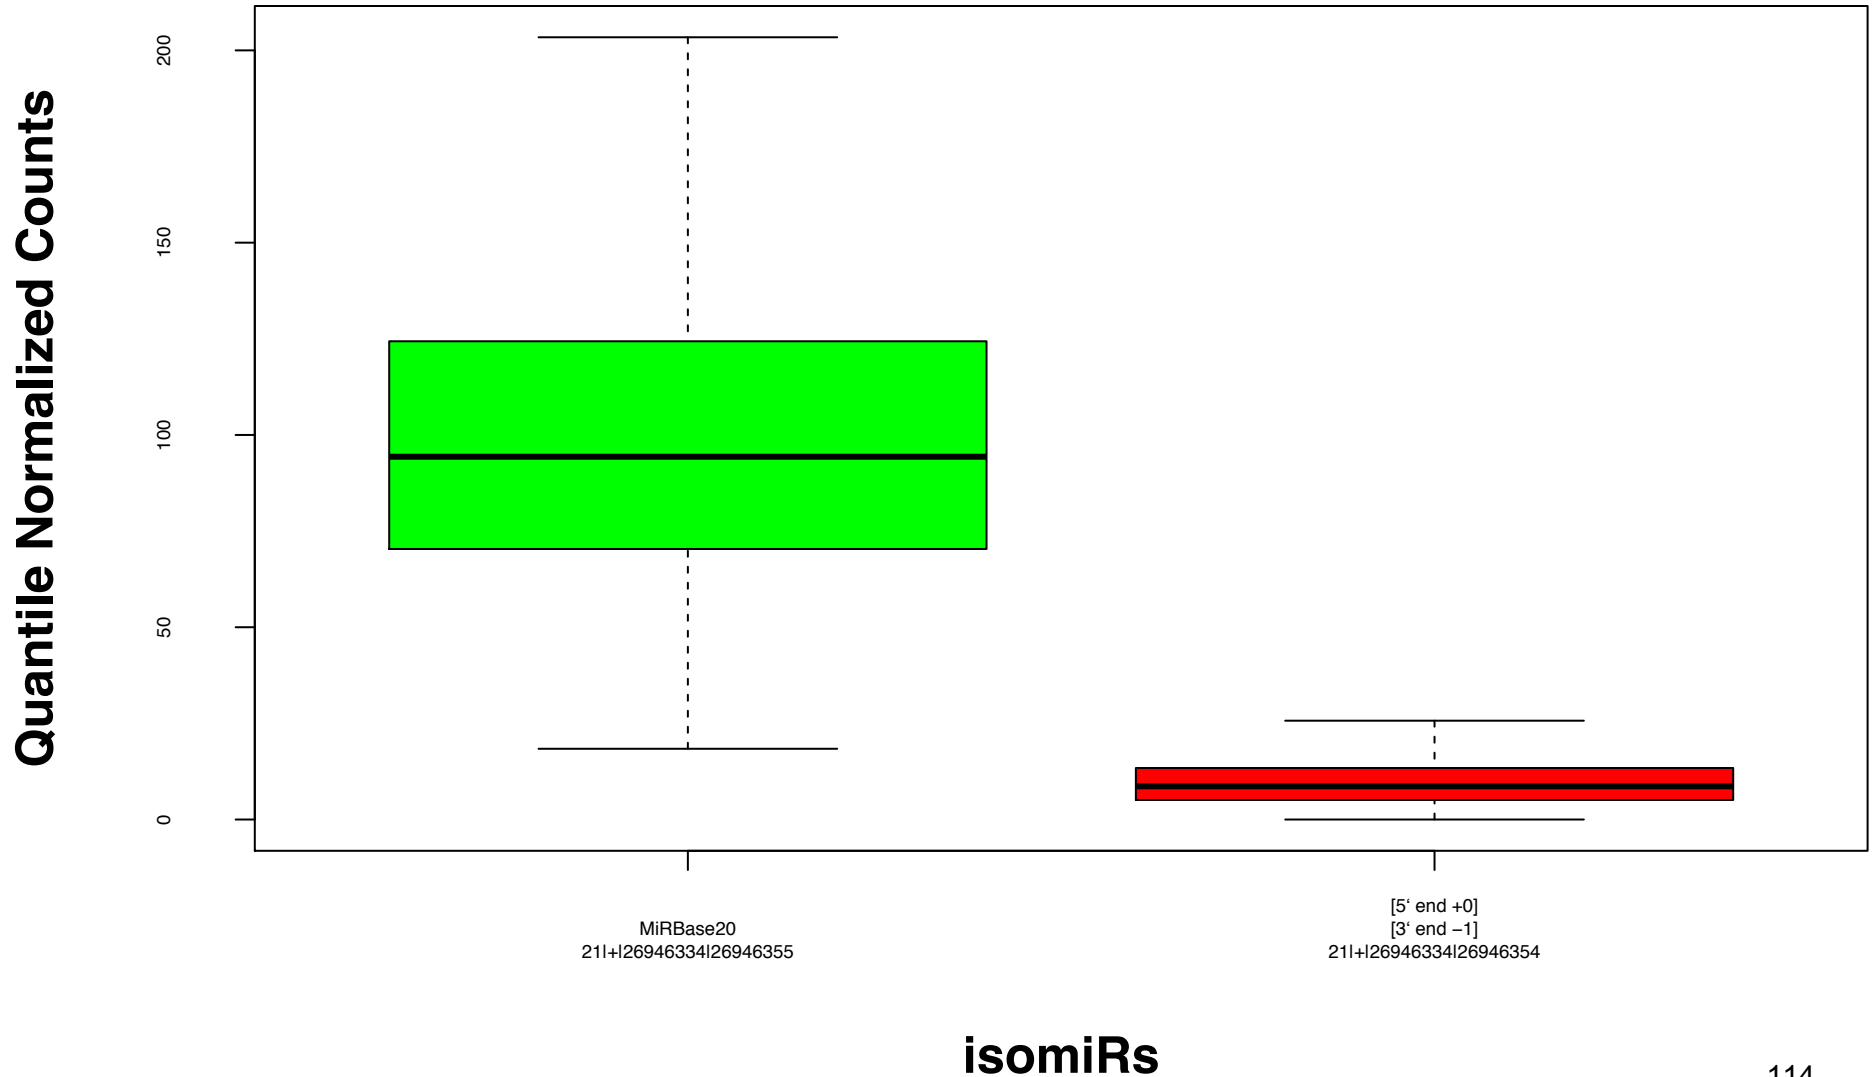

# MIMAT0026477=hsa-miR-128-1-5p=MI0000447

Quantile Normalized Counts

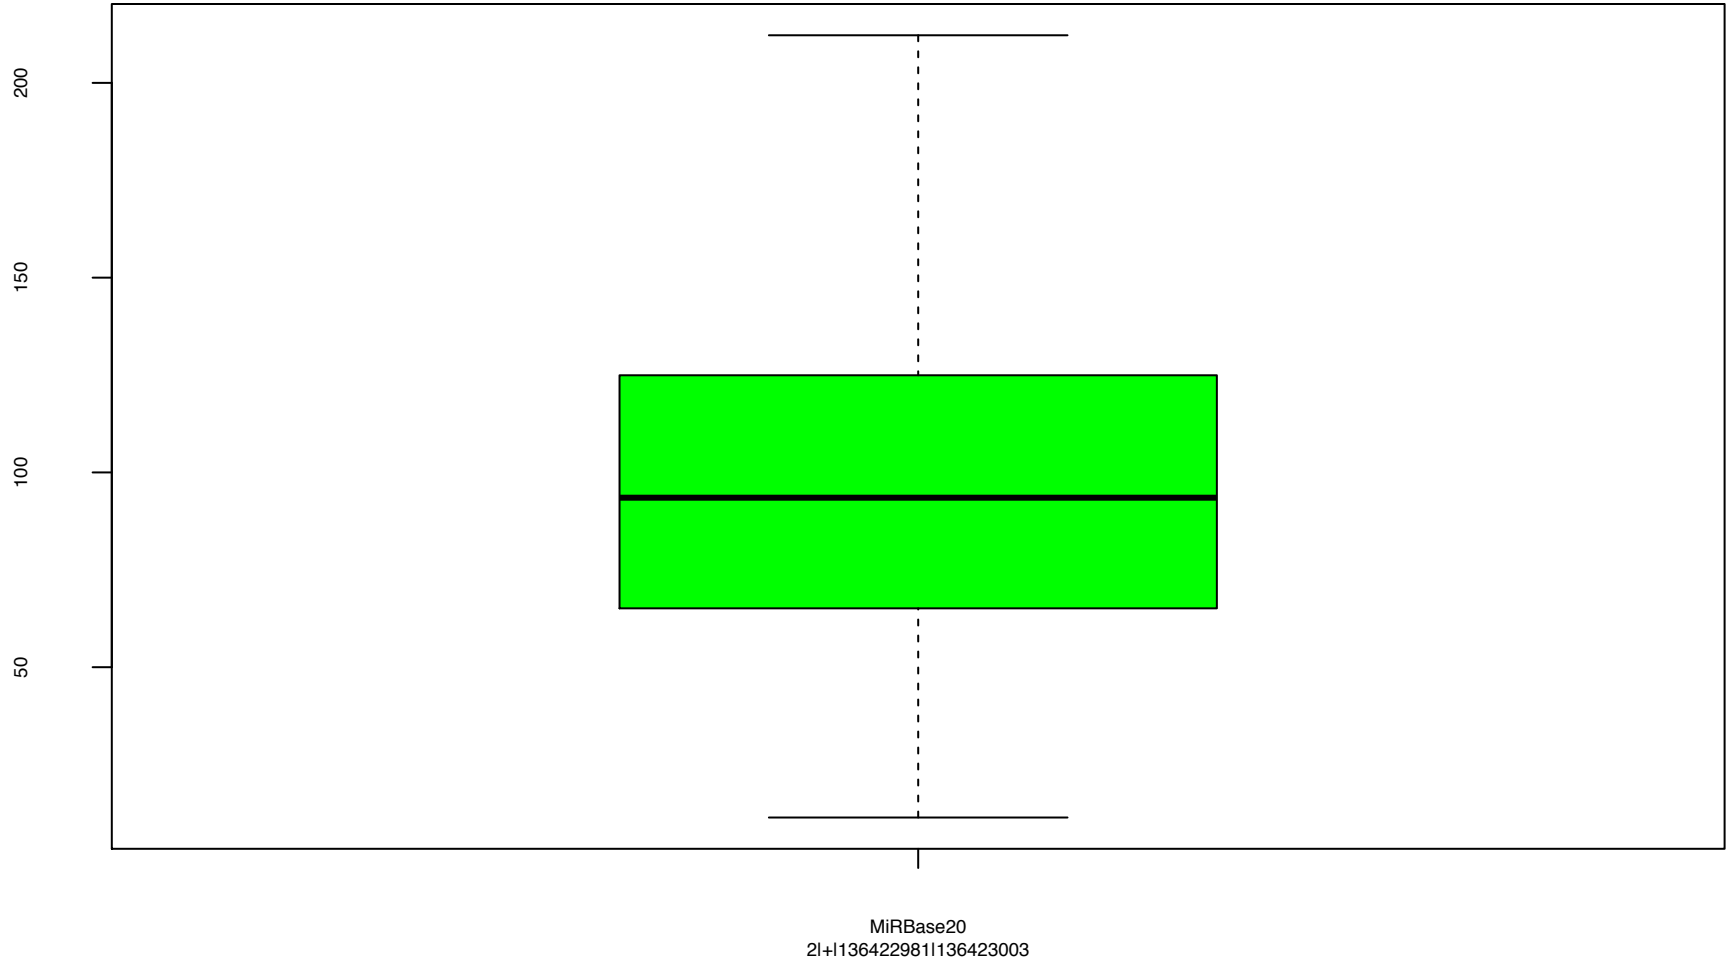

MiRBase20  
2l+11364229811136423003

isomiRs

# MIMAT0000066=hsa-let-7e-5p=MI0000066

Quantile Normalized Counts

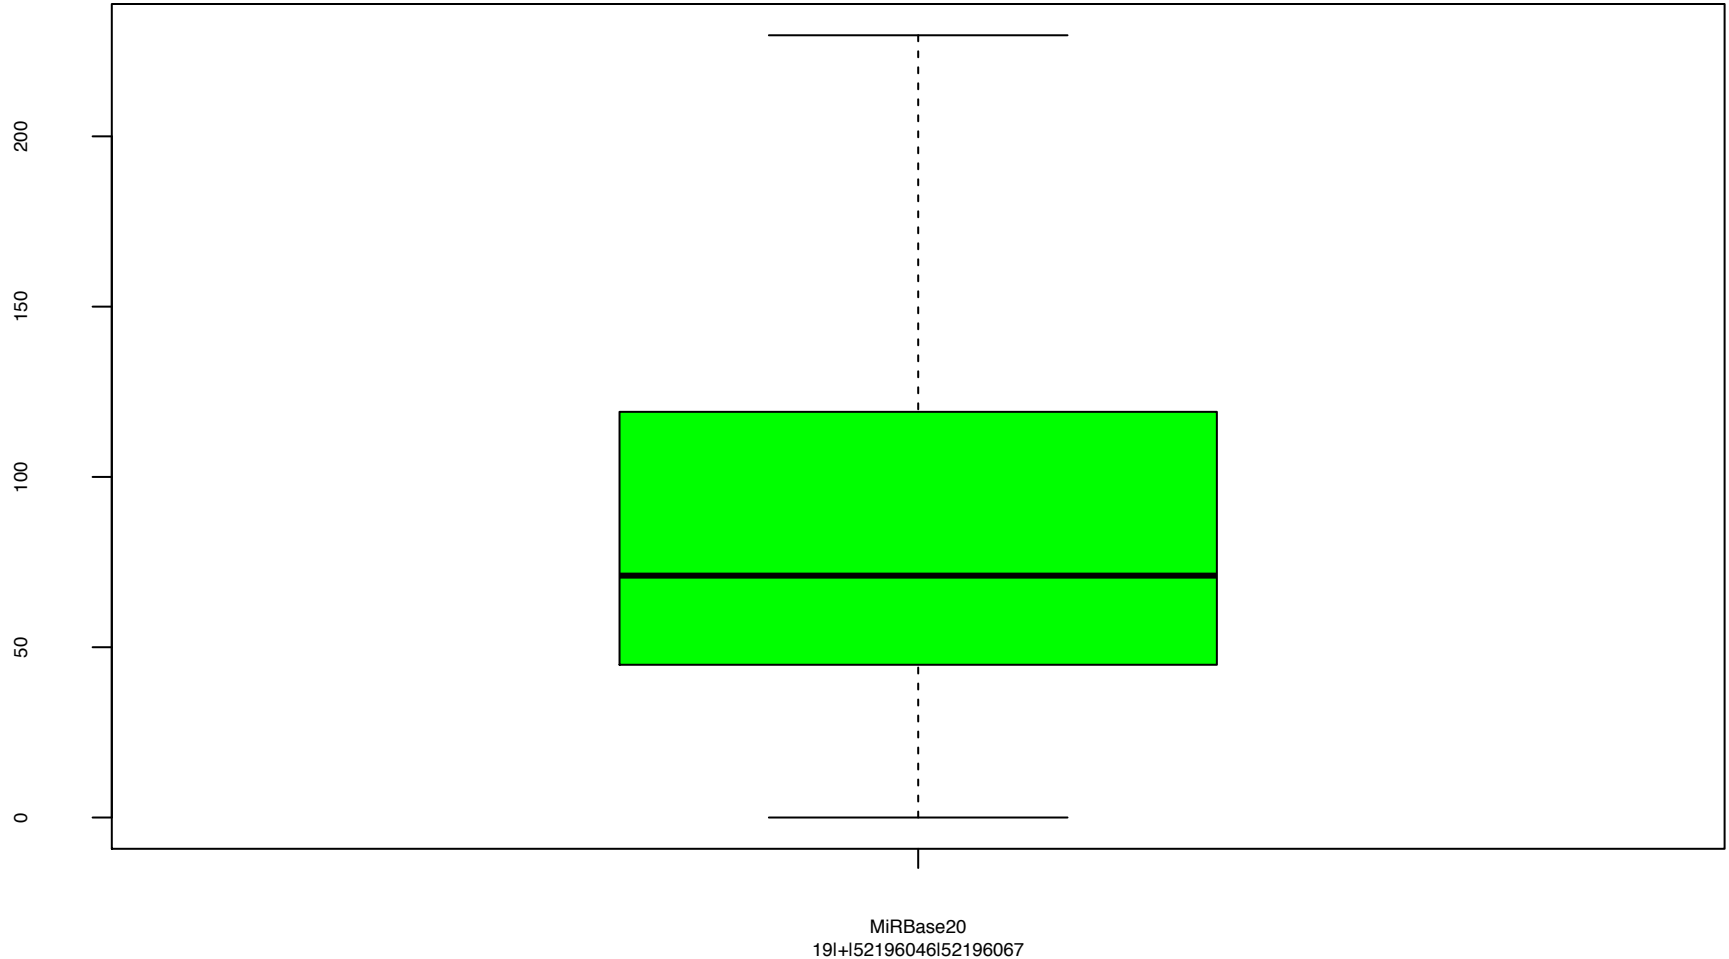

MiRBase20  
19l+152196046|52196067

isomiRs

# MIMAT0000681=hsa-miR-29c-3p=MI0000735

Quantile Normalized Counts

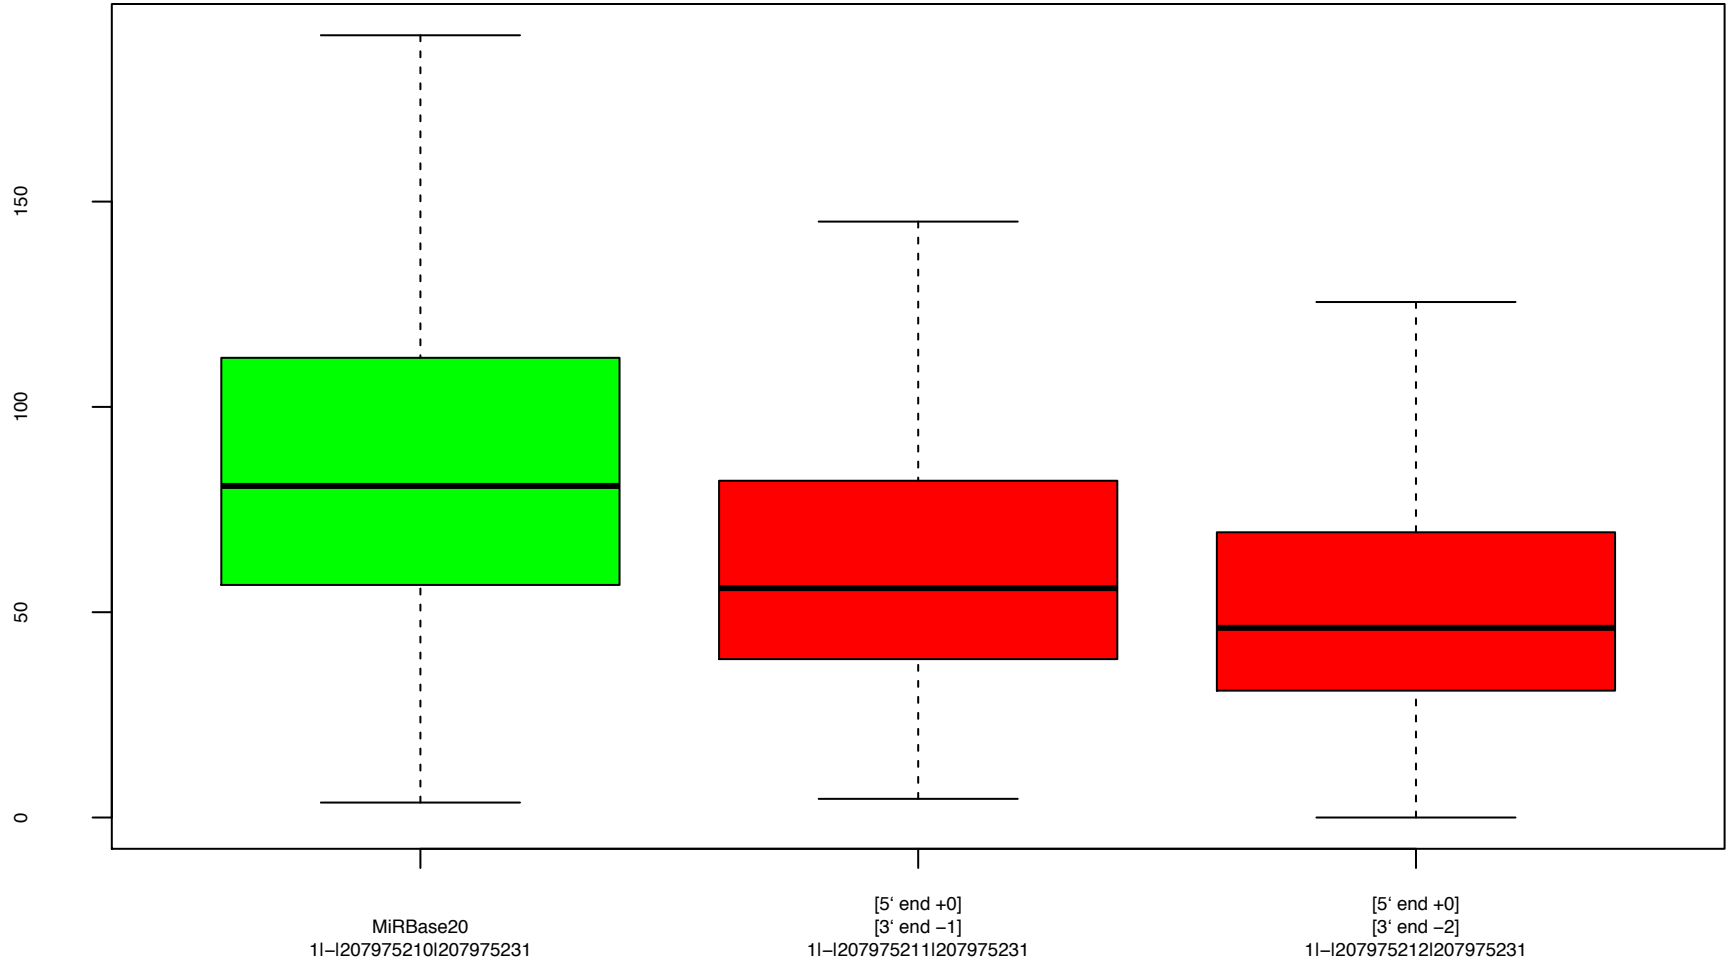

isomiRs

# MIMAT0000101=hsa-miR-103a-3p=MI0000108

Quantile Normalized Counts

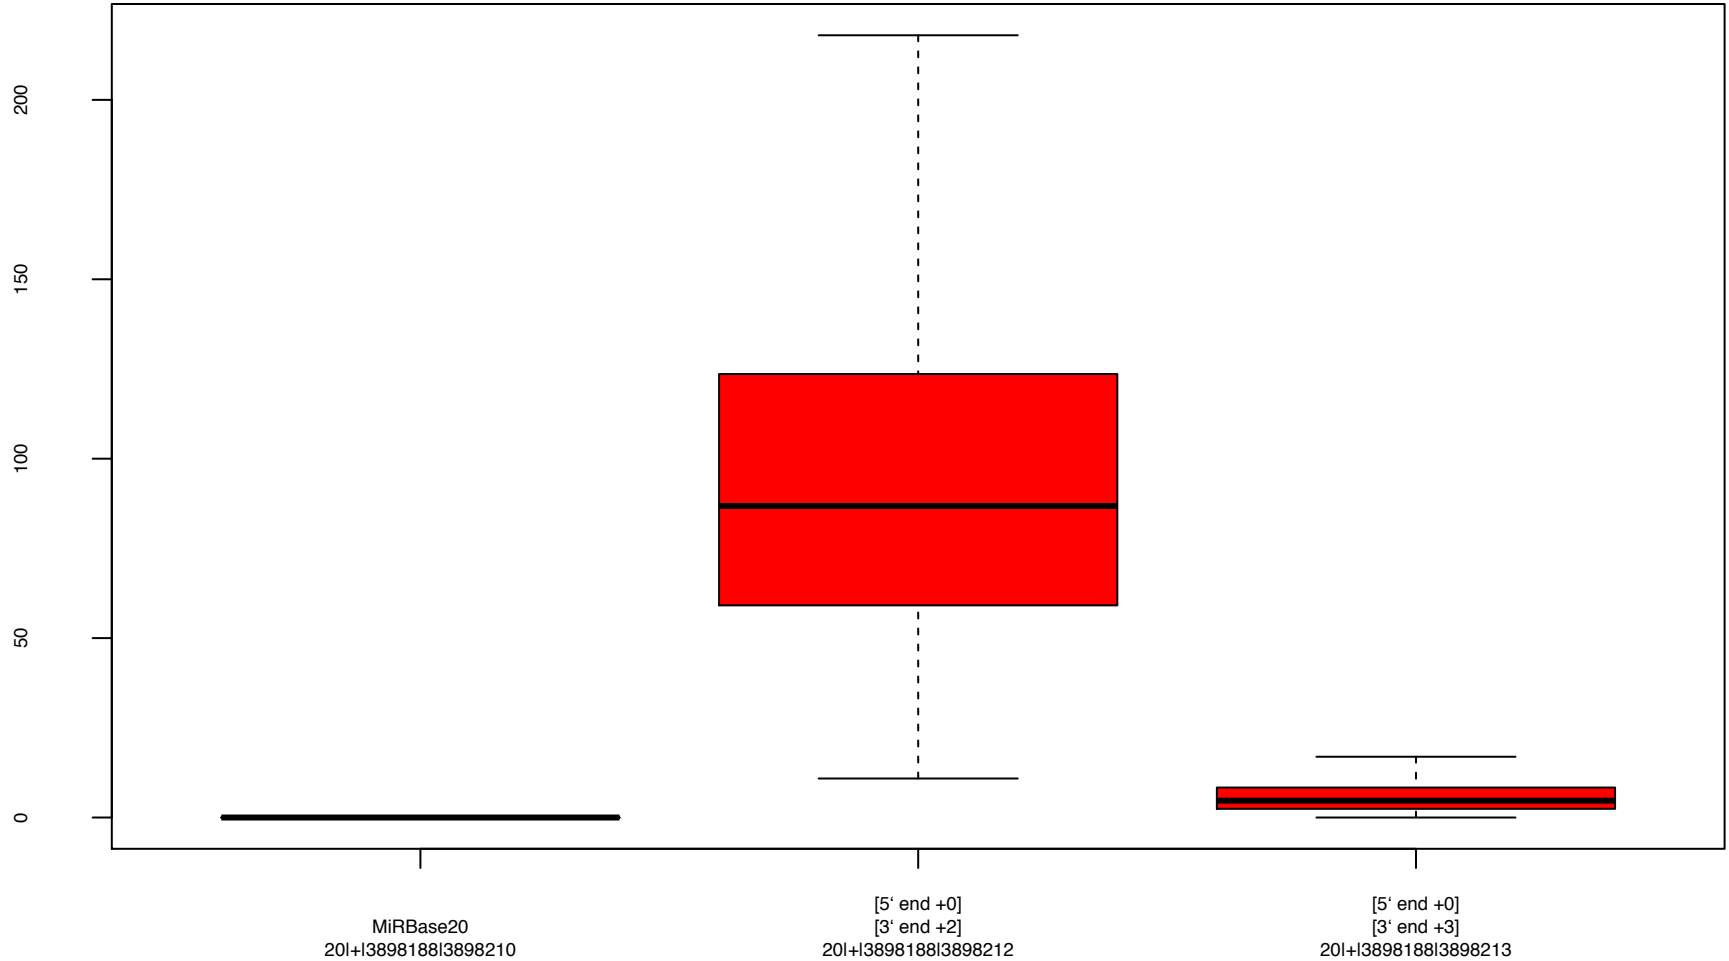

isomiRs

# MIMAT0000689=hsa-miR-99b-5p=MI0000746

Quantile Normalized Counts

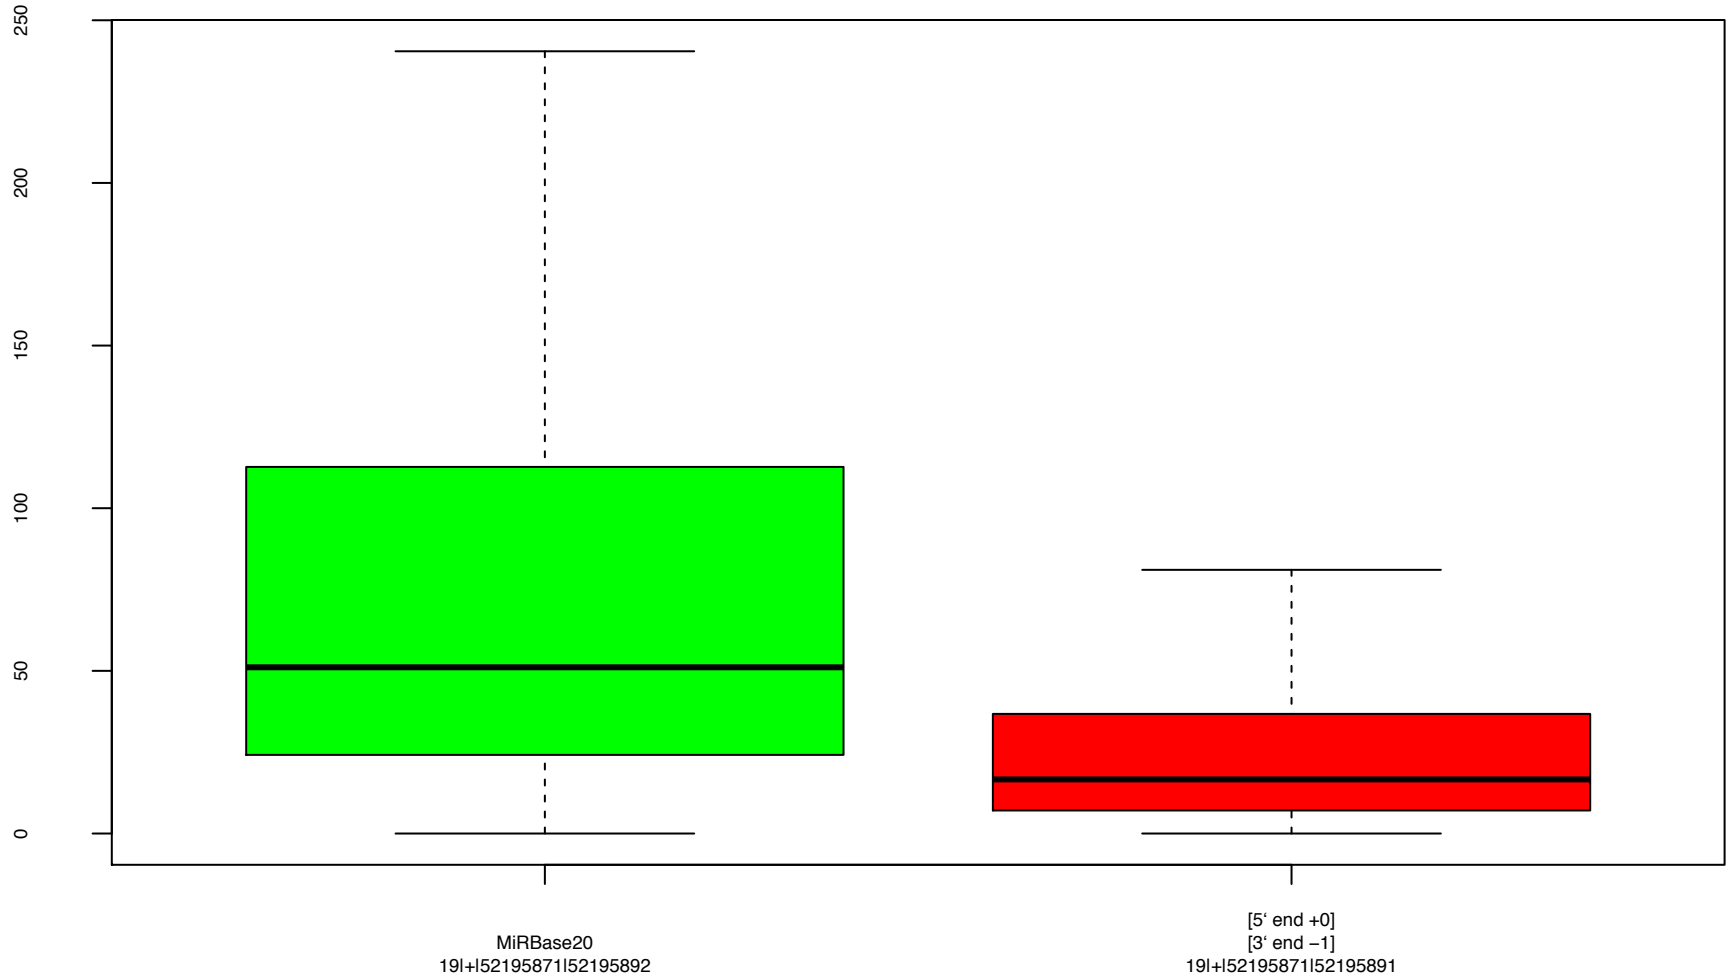

isomiRs



# MIMAT0004766=hsa-miR-146b-3p=MI0003129

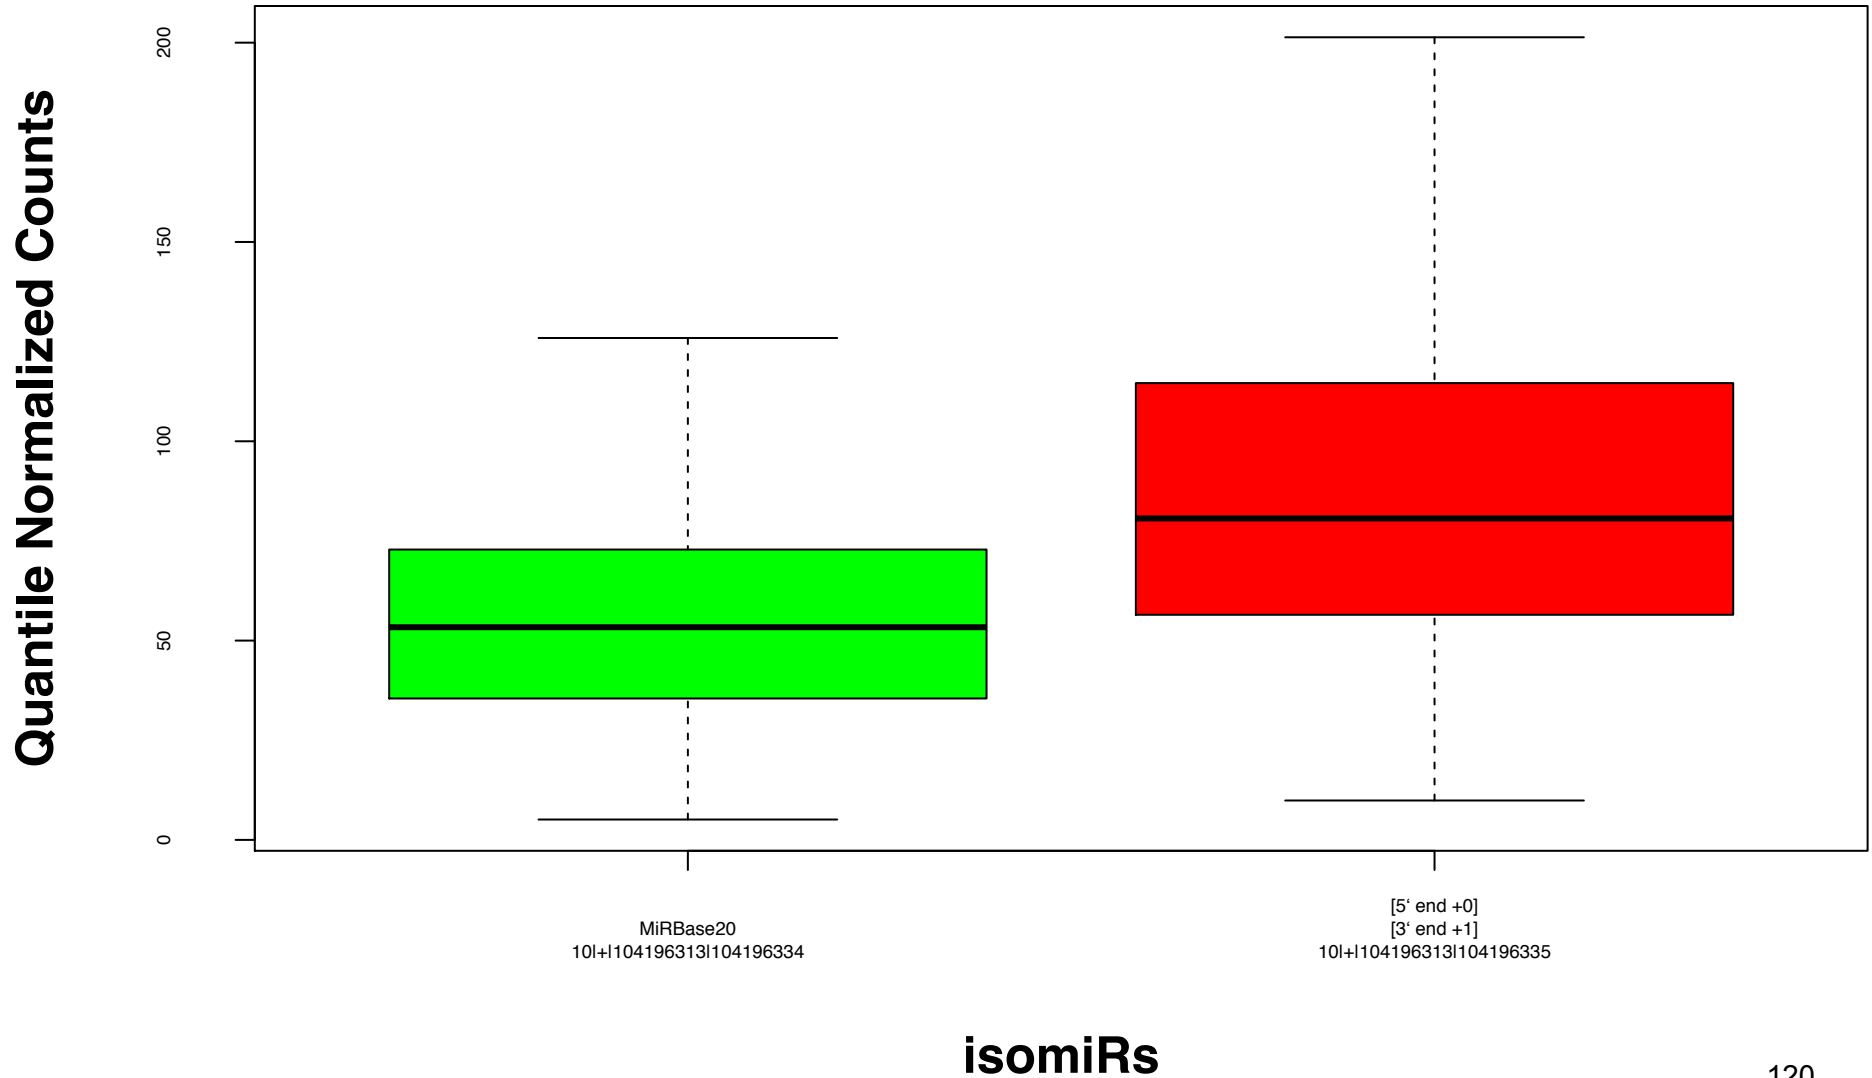

# MIMAT0004586=hsa-miR-15b-3p=MI0000438

Quantile Normalized Counts

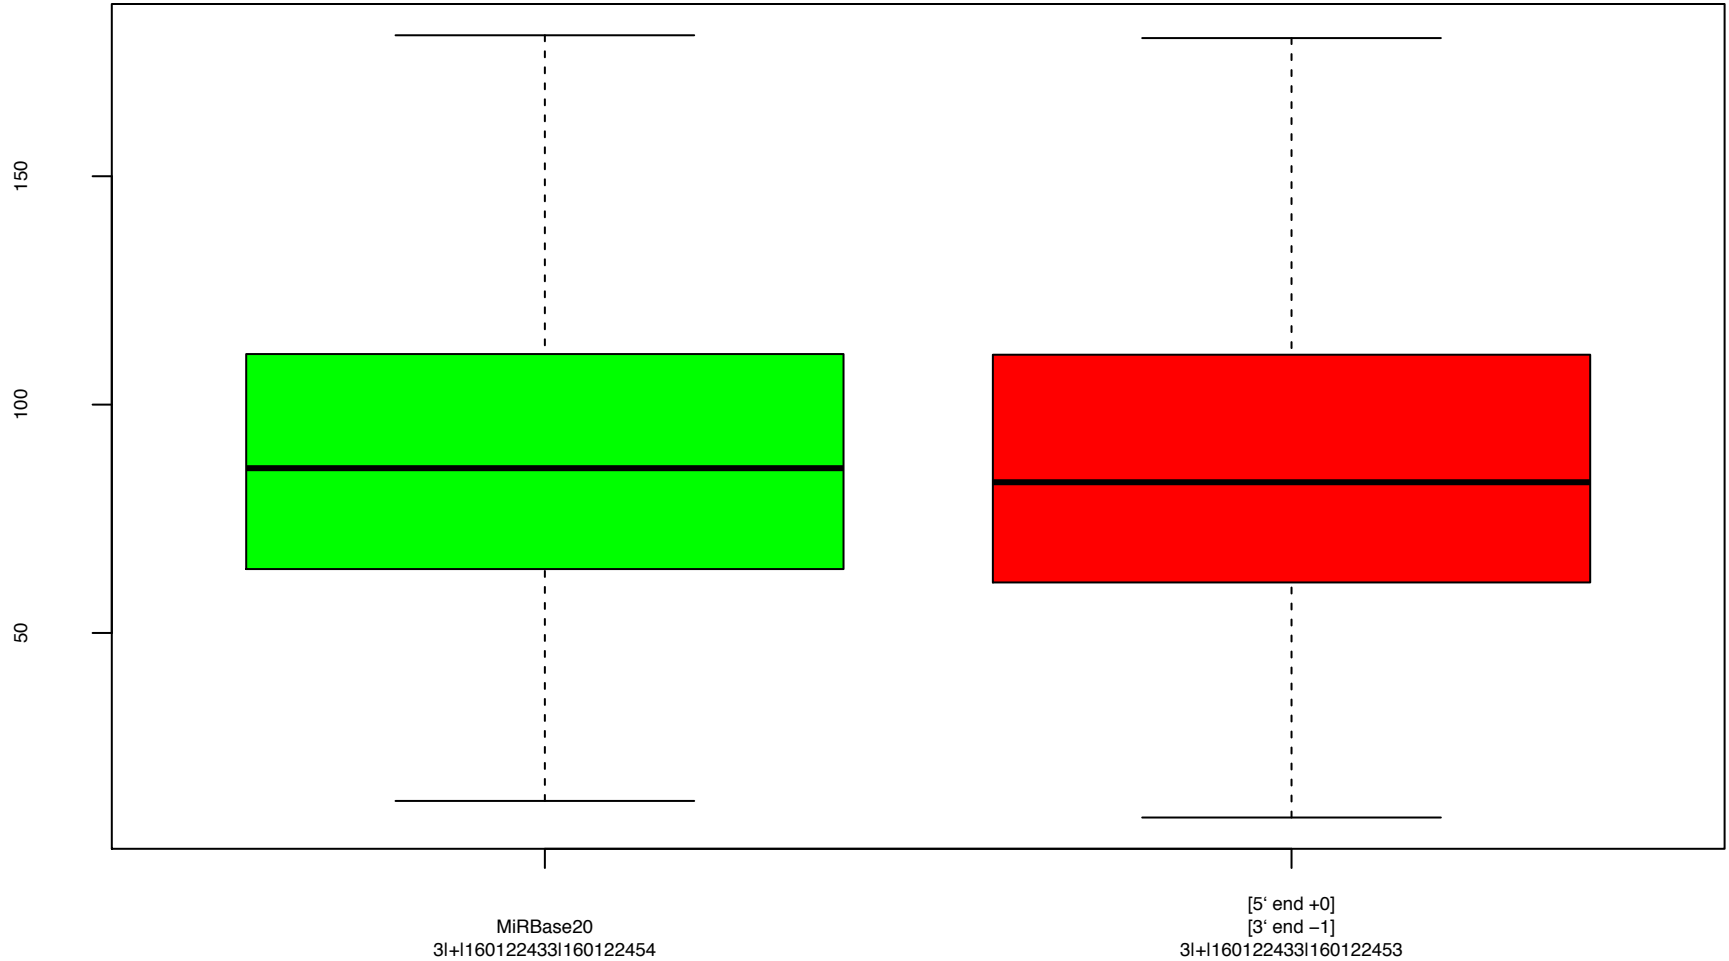

isomiRs

# MIMAT0004693=hsa-miR-330-5p=MI0000803

Quantile Normalized Counts

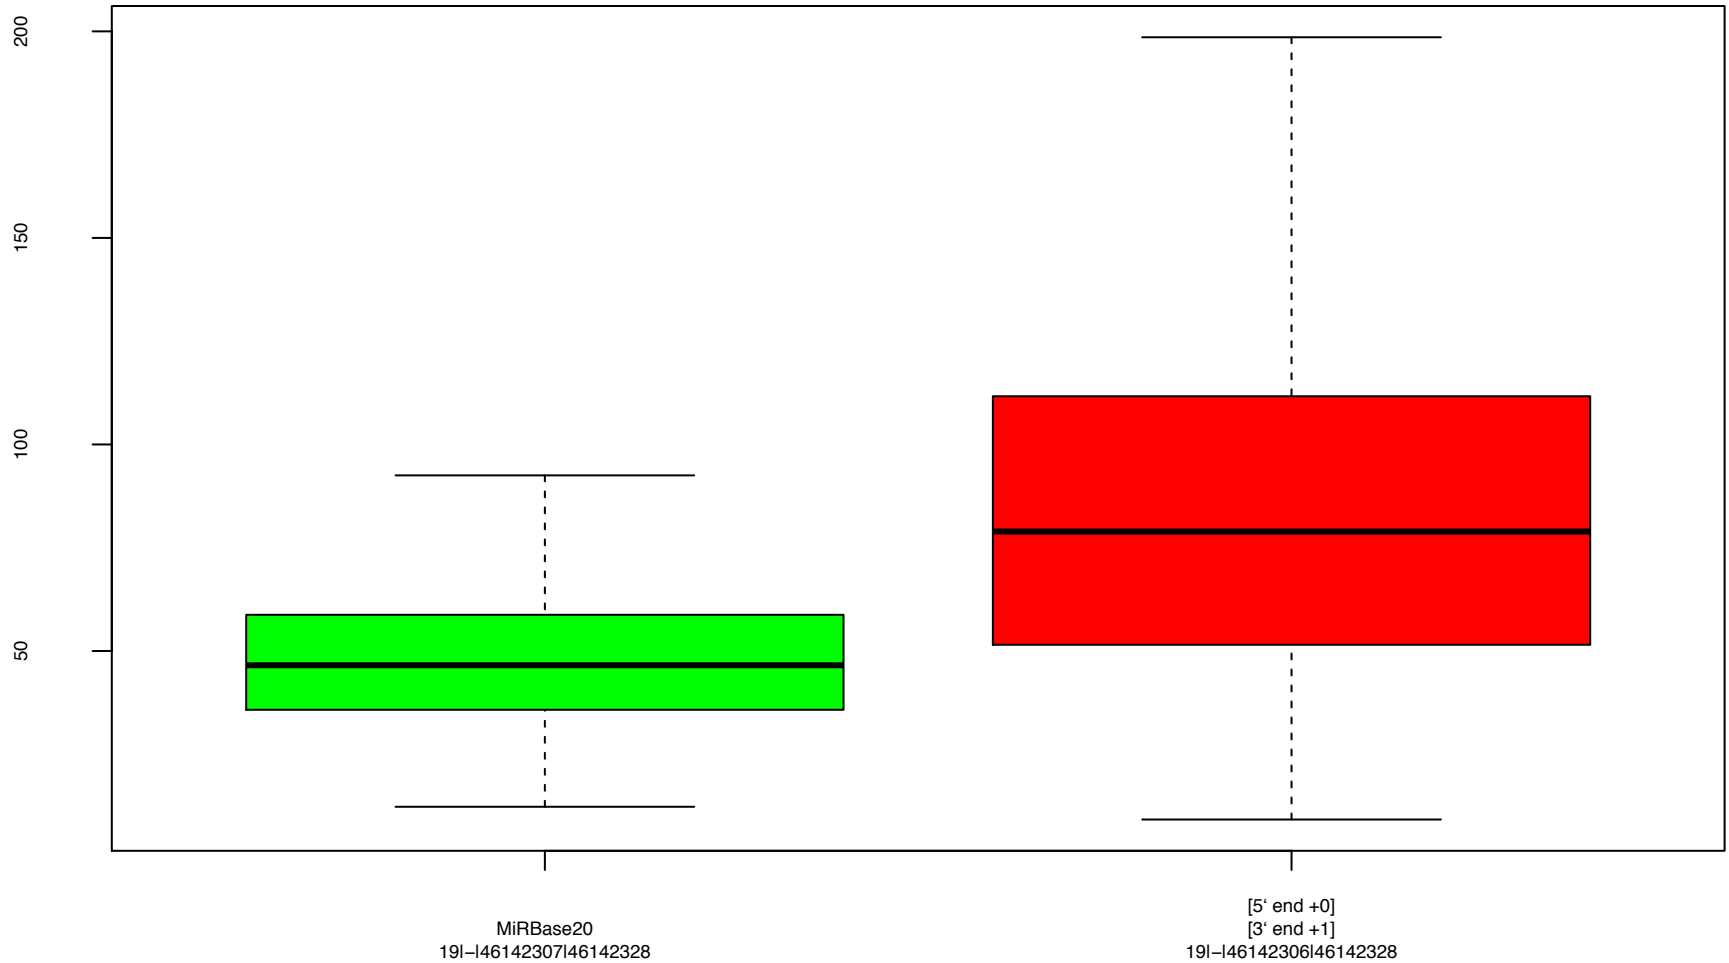

isomiRs

# MIMAT0000062=hsa-let-7a-5p=MI0000061

Quantile Normalized Counts

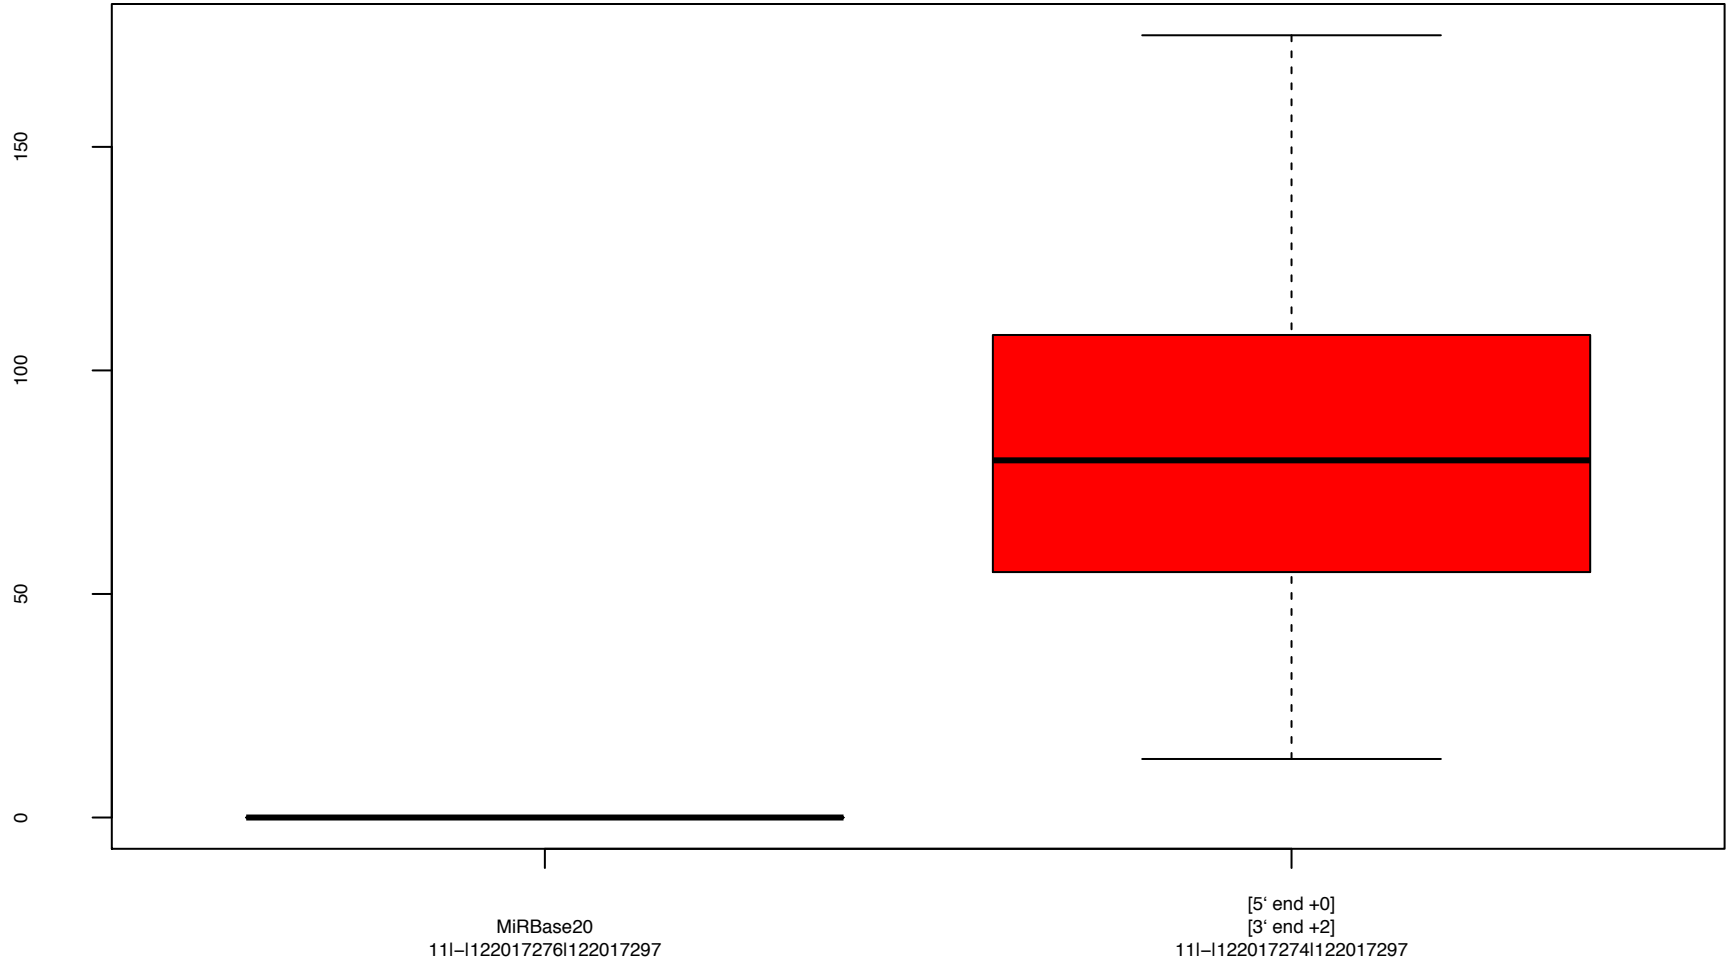

isomiRs

# MIMAT0000103=hsa-miR-106a-5p=MI0000113

Quantile Normalized Counts

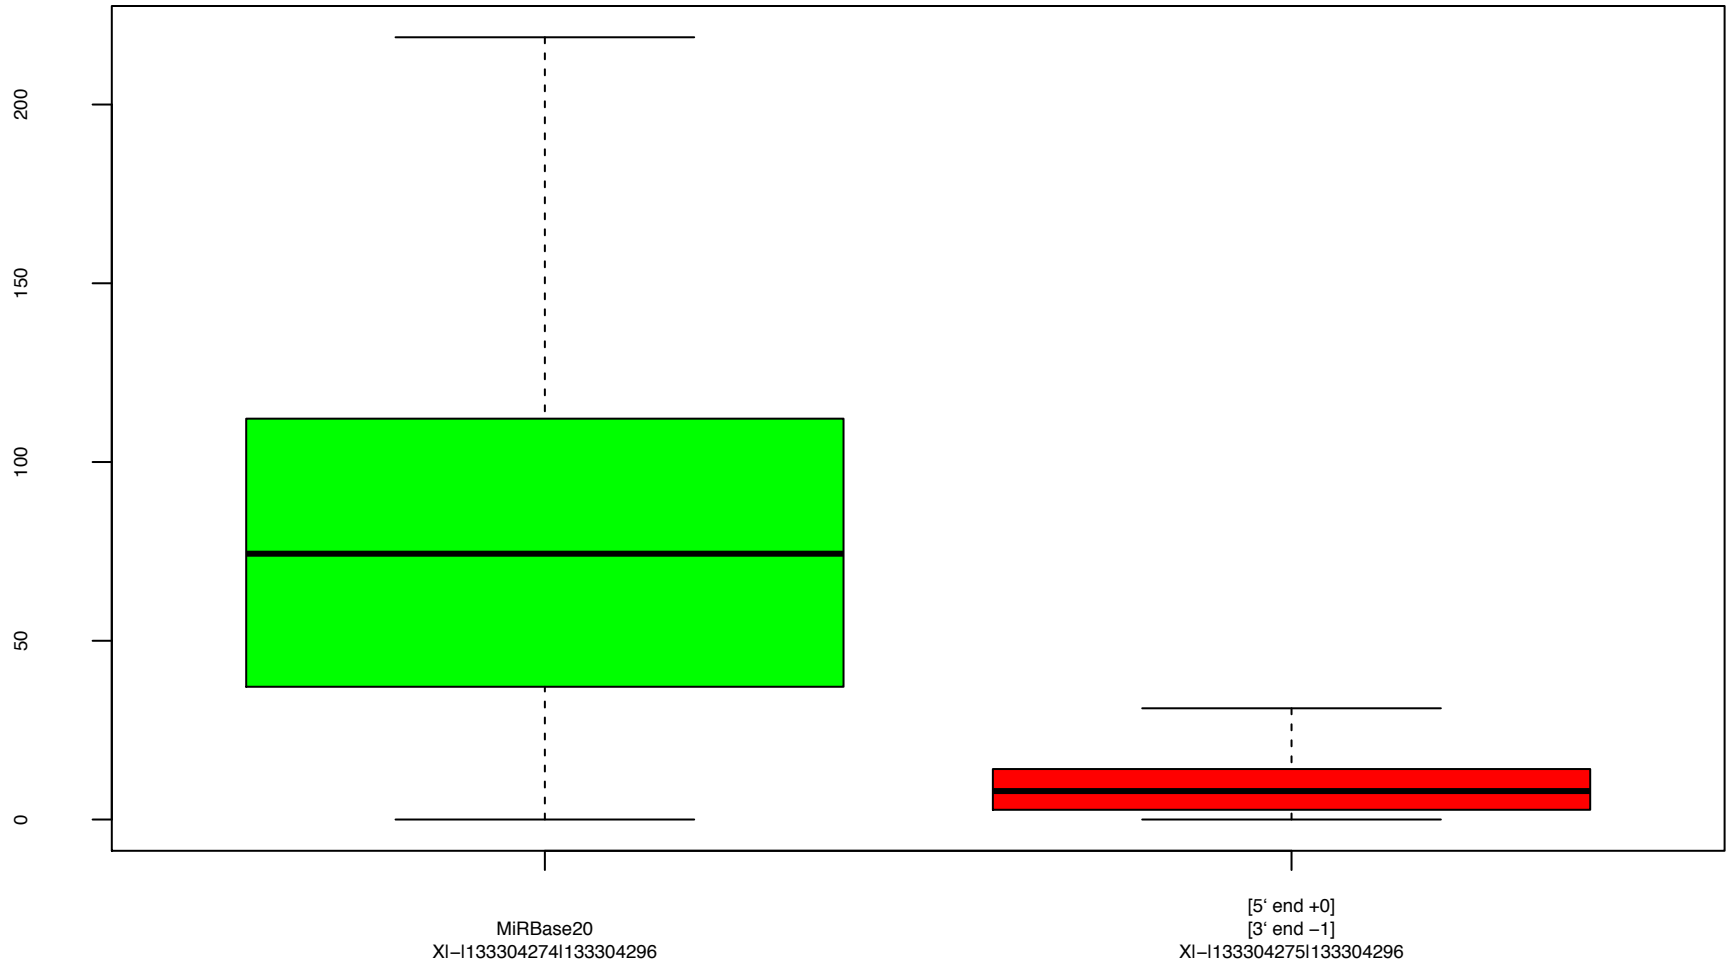

isomiRs

# MIMAT0000764=hsa-miR-339-5p=MI0000815

Quantile Normalized Counts

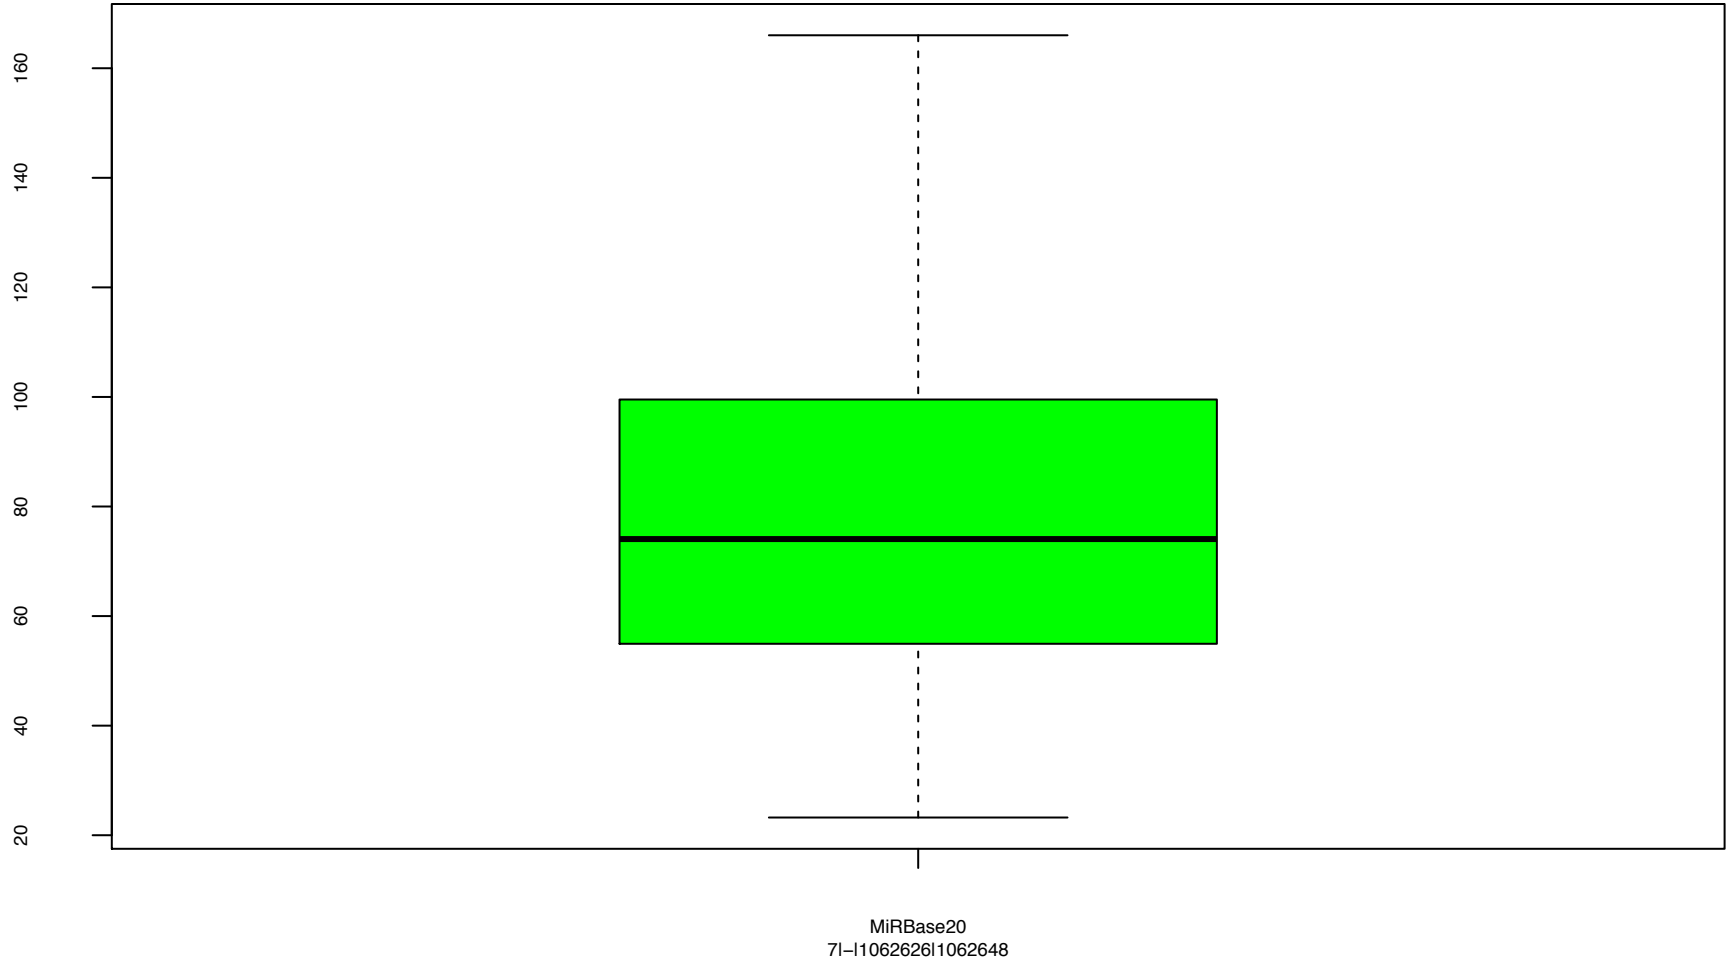

isomiRs

# MIMAT0001343=hsa-miR-425-3p=MI0001448

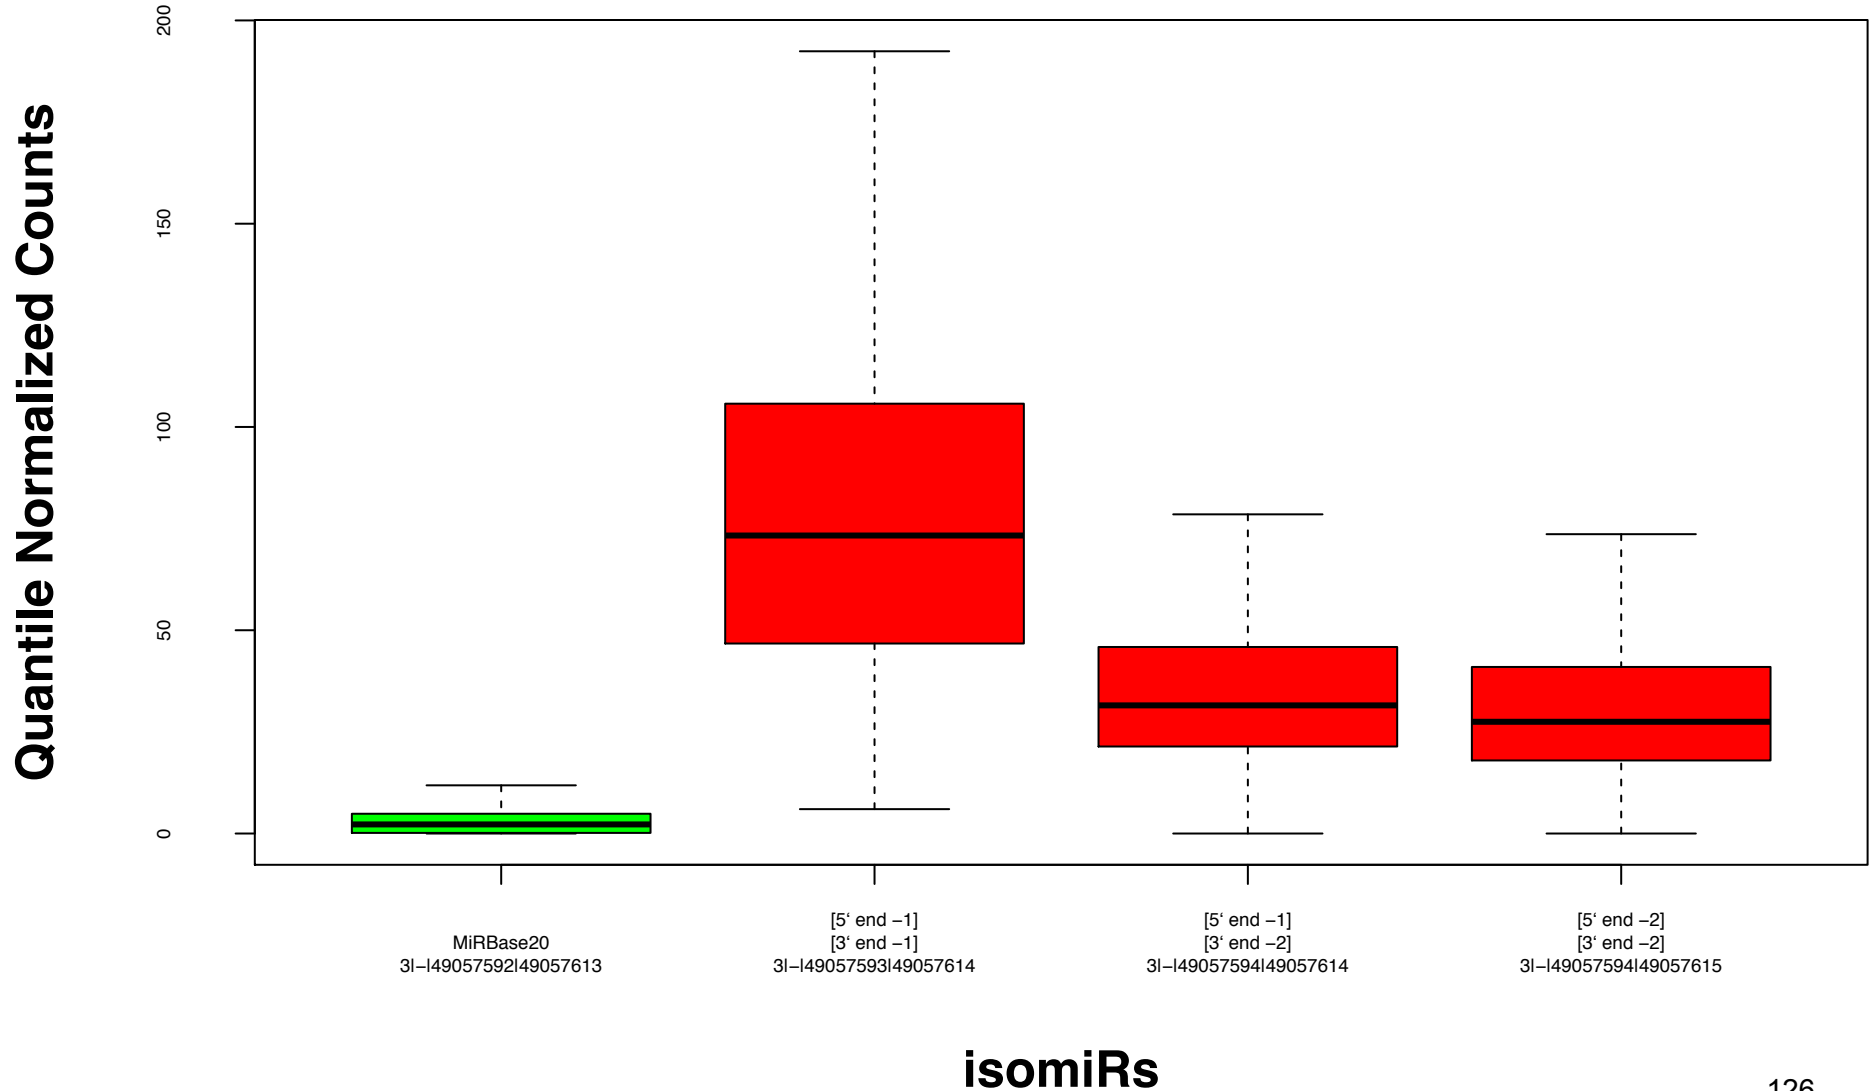

# MIMAT0018108=hsa-miR-3681-5p=MI0016082

Quantile Normalized Counts

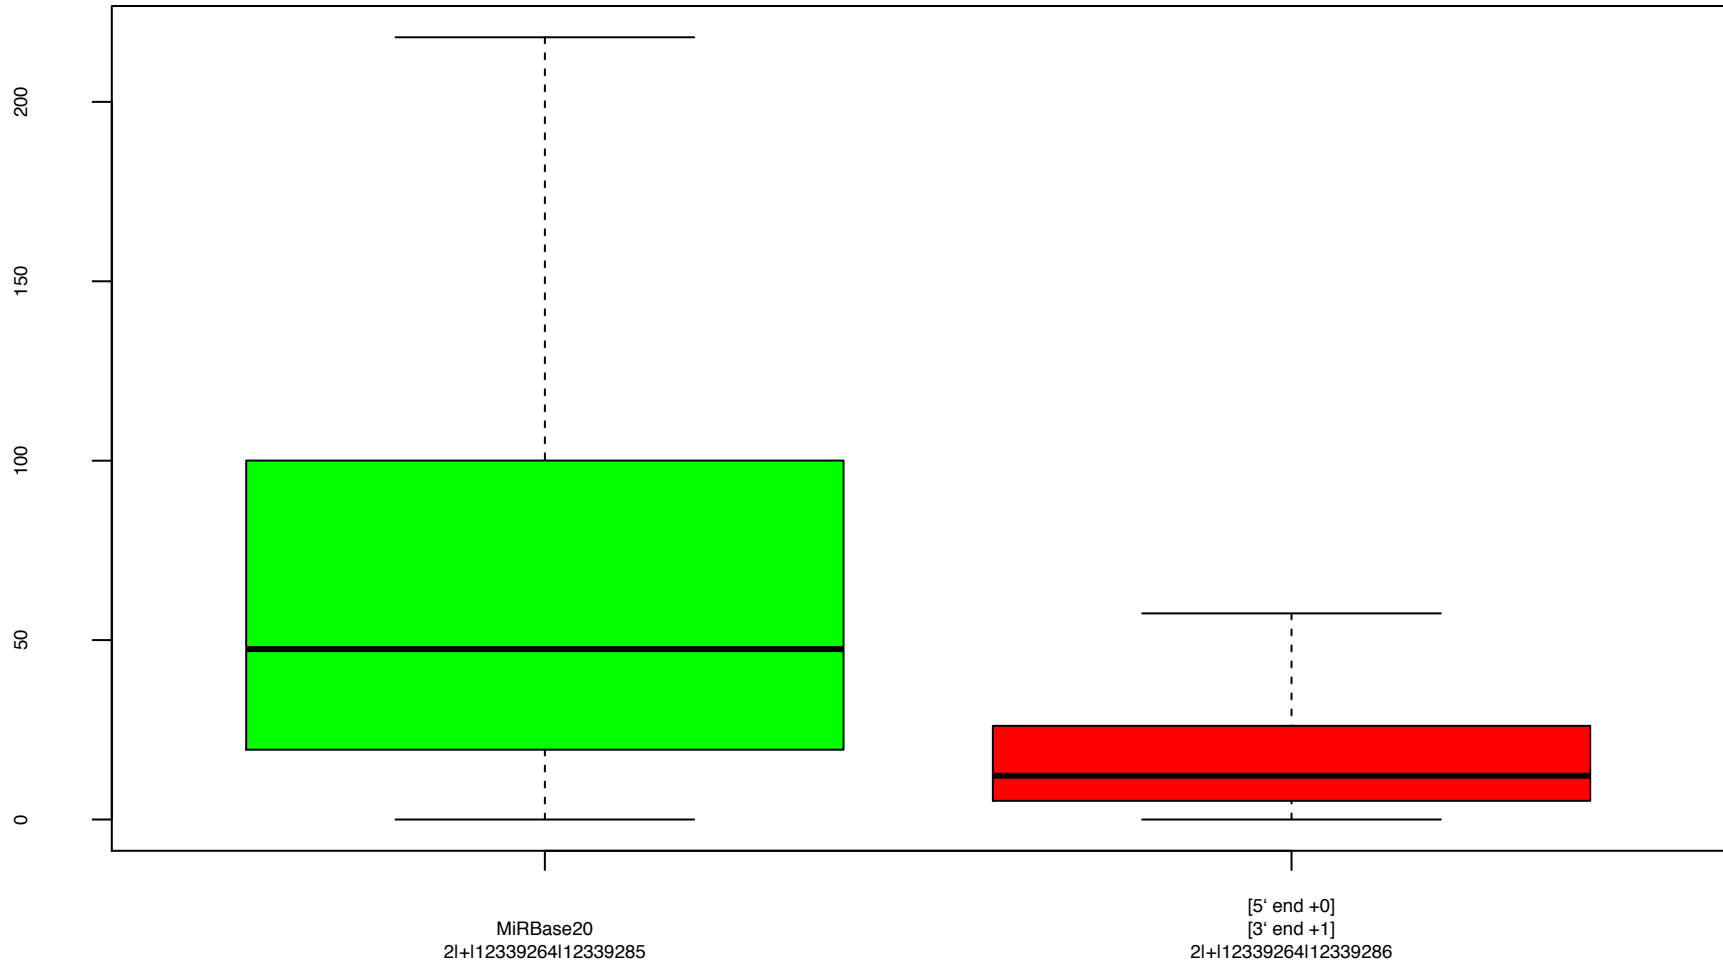

isomiRs



# MIMAT0004688=hsa-miR-374a-3p=MI0000782

Quantile Normalized Counts

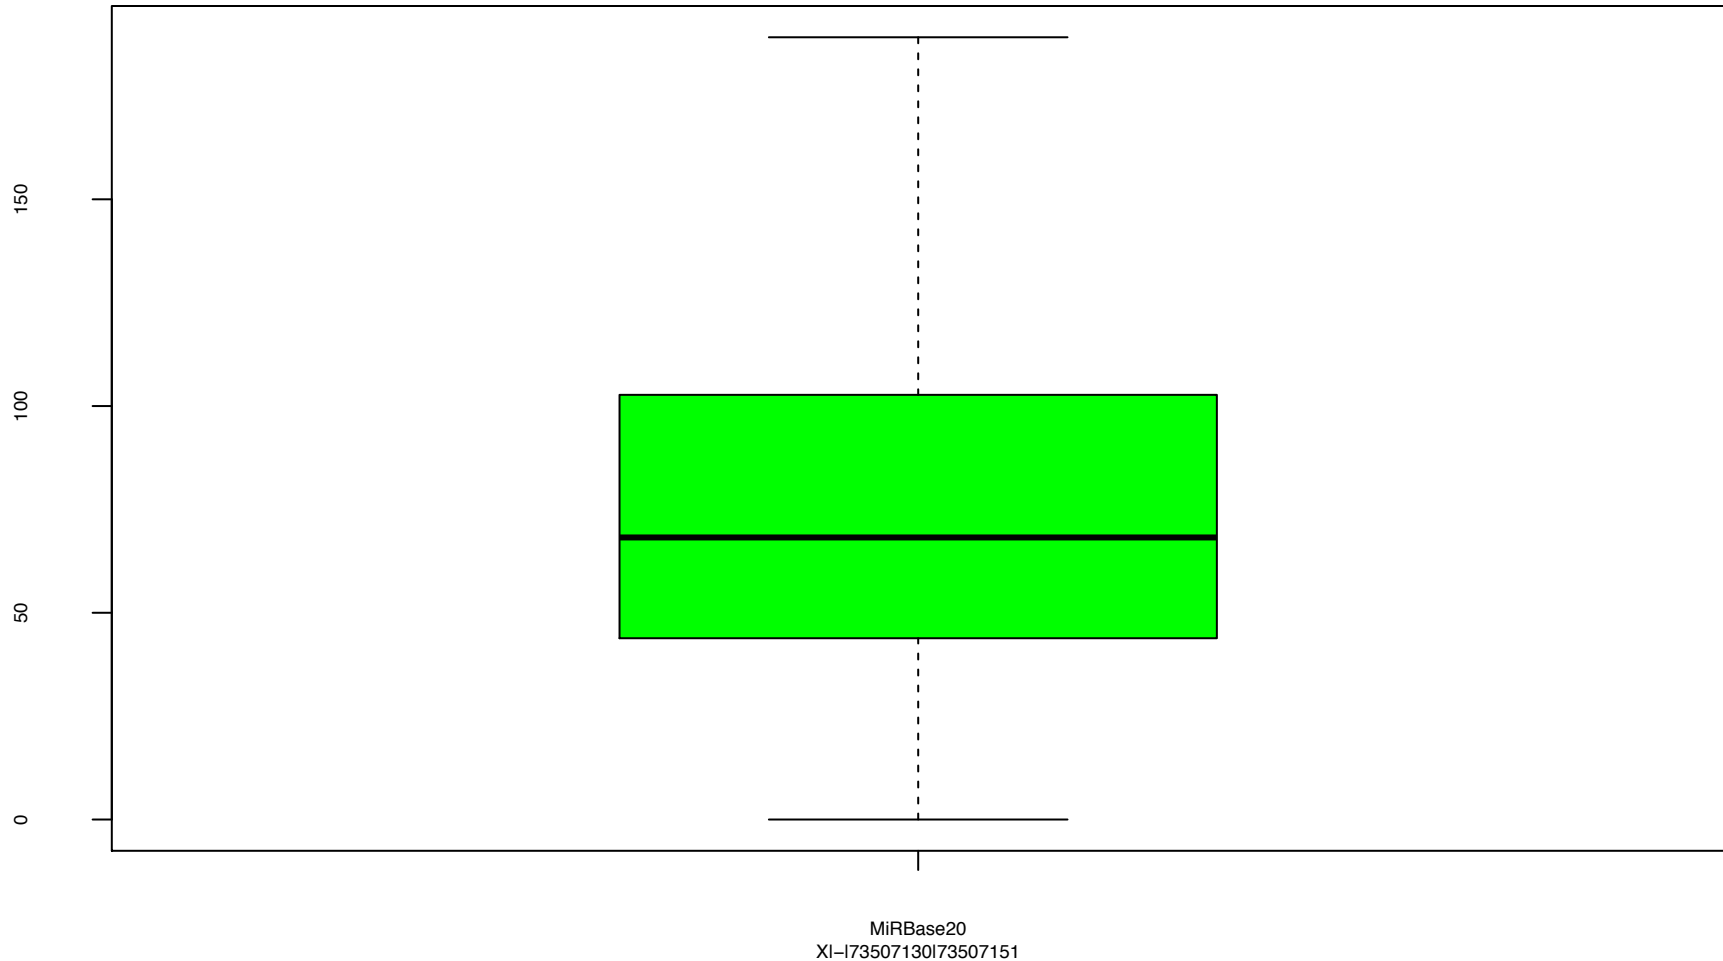

isomiRs

# MIMAT0017994=hsa-miR-3615=MI0016005

Quantile Normalized Counts

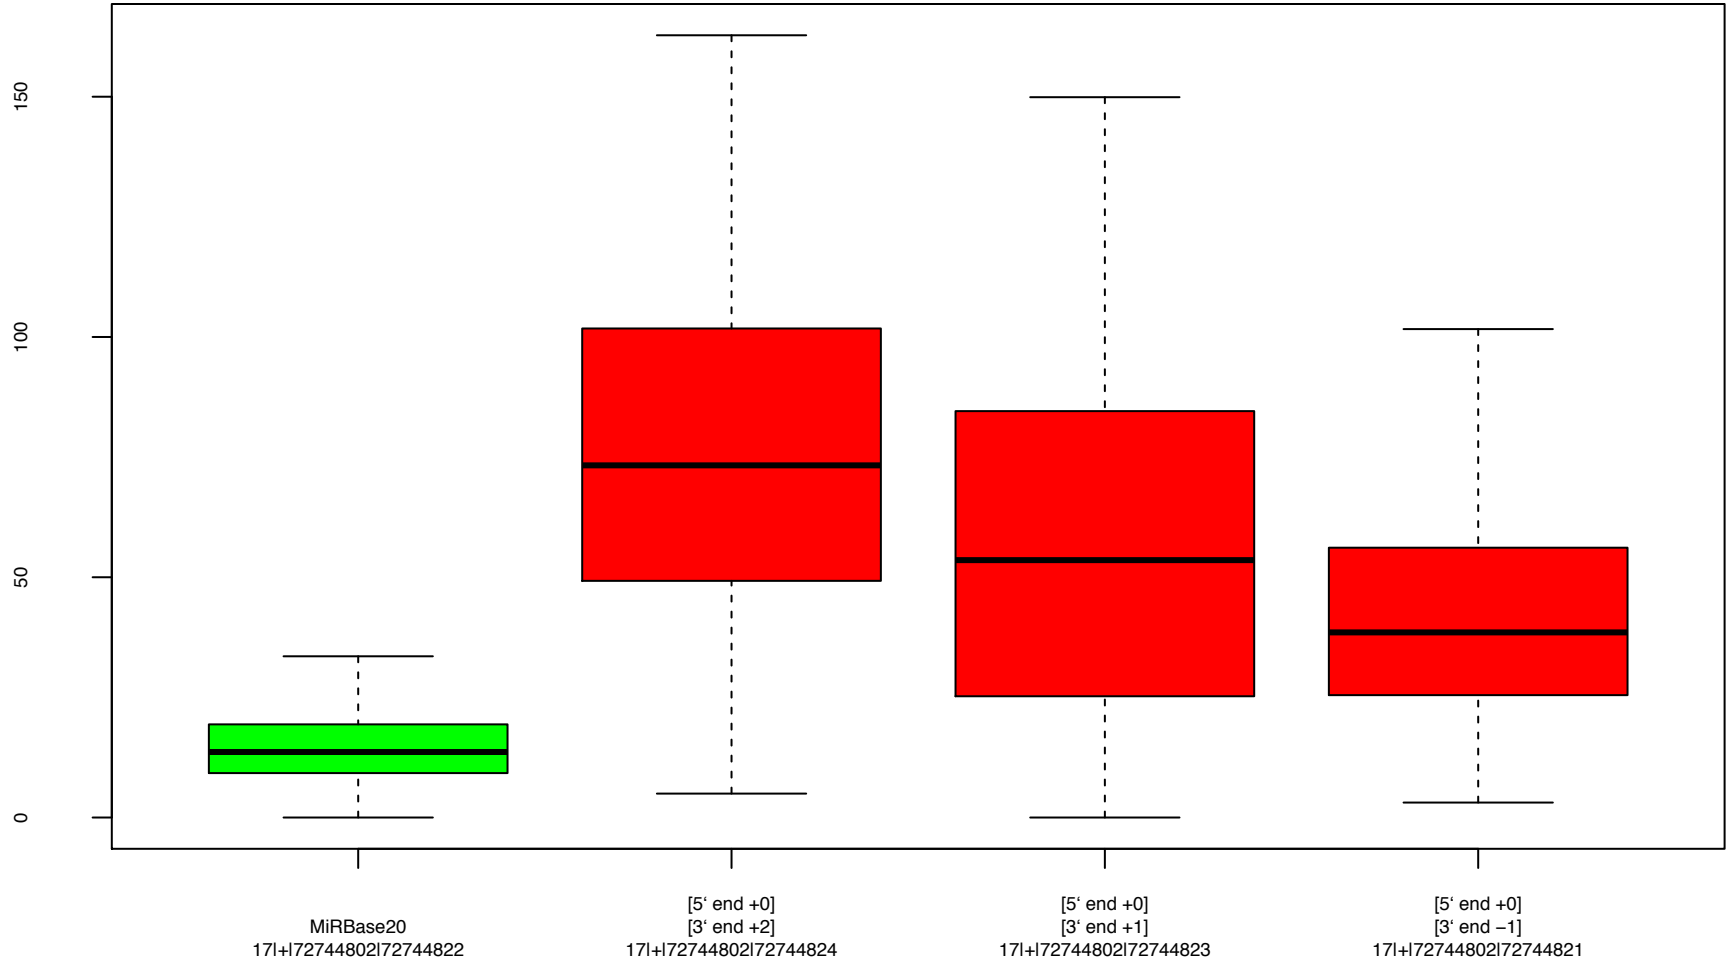

isomiRs

# MIMAT0002821=hsa-miR-181d-5p=MI0003139

Quantile Normalized Counts

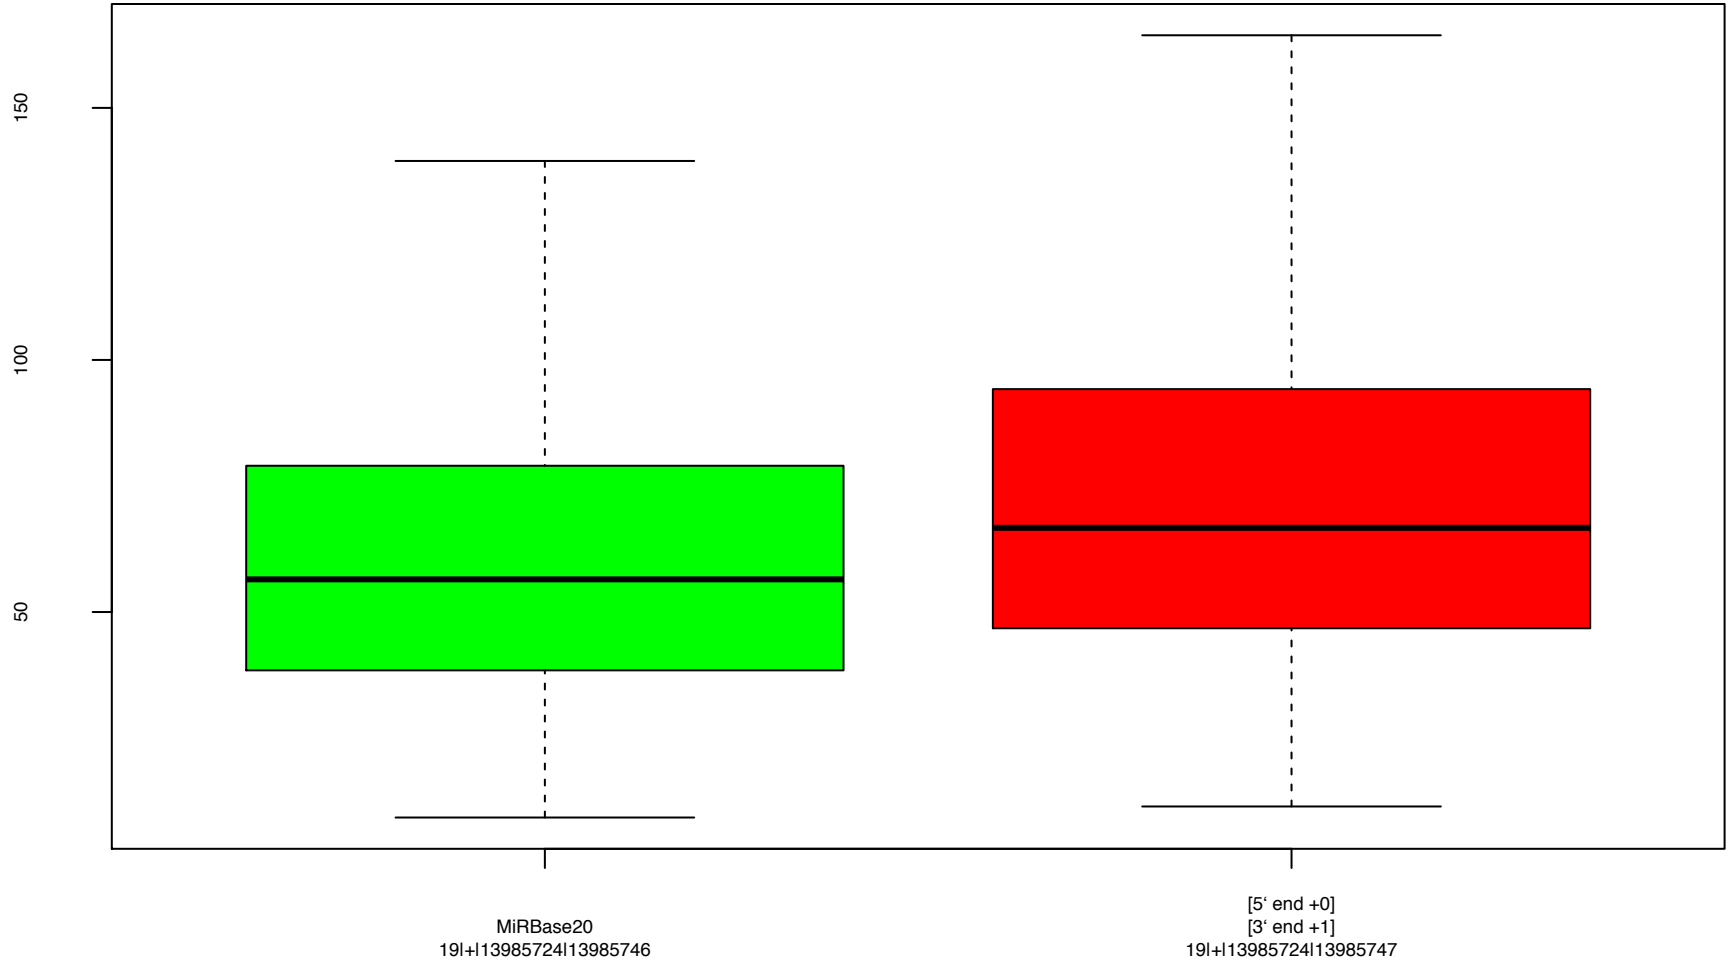

isomiRs

# MIMAT0004674=hsa-miR-30c-1-3p=MI0000736

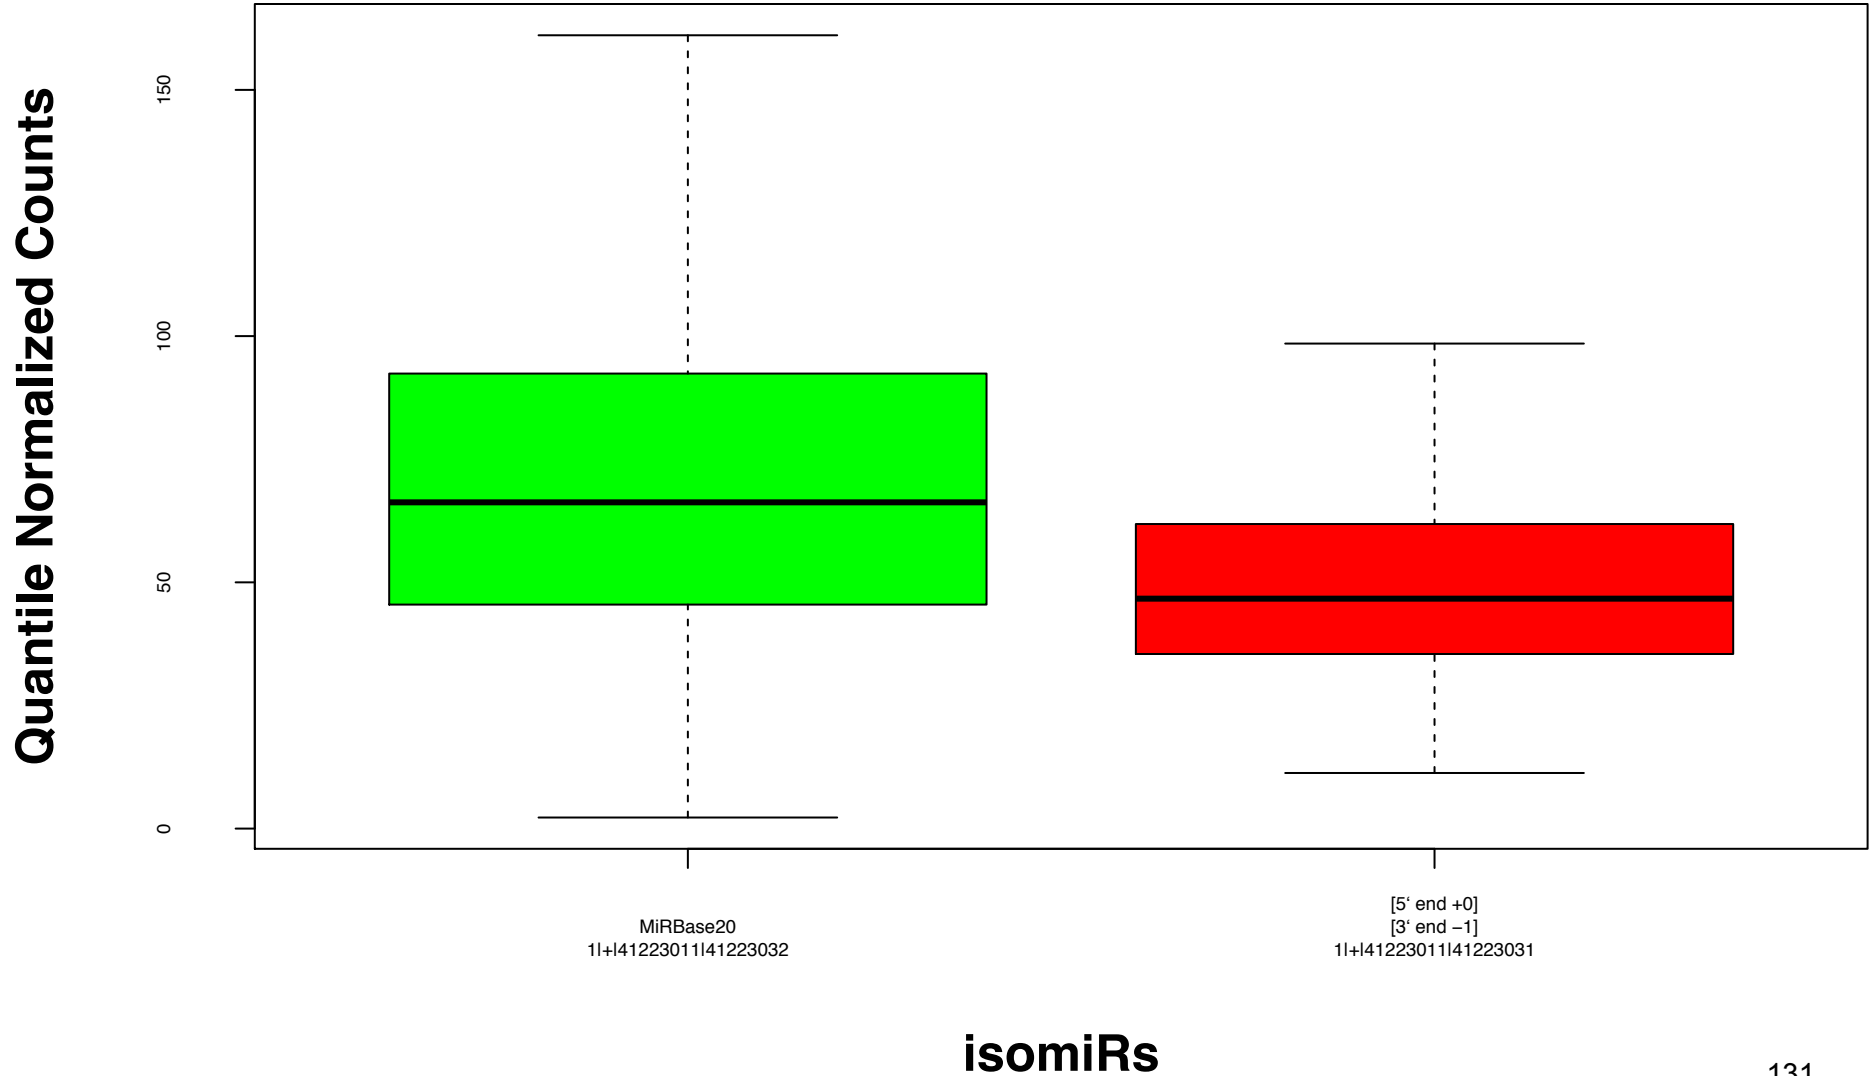

# MIMAT0002177=hsa-miR-486-5p=MI0002470

Quantile Normalized Counts

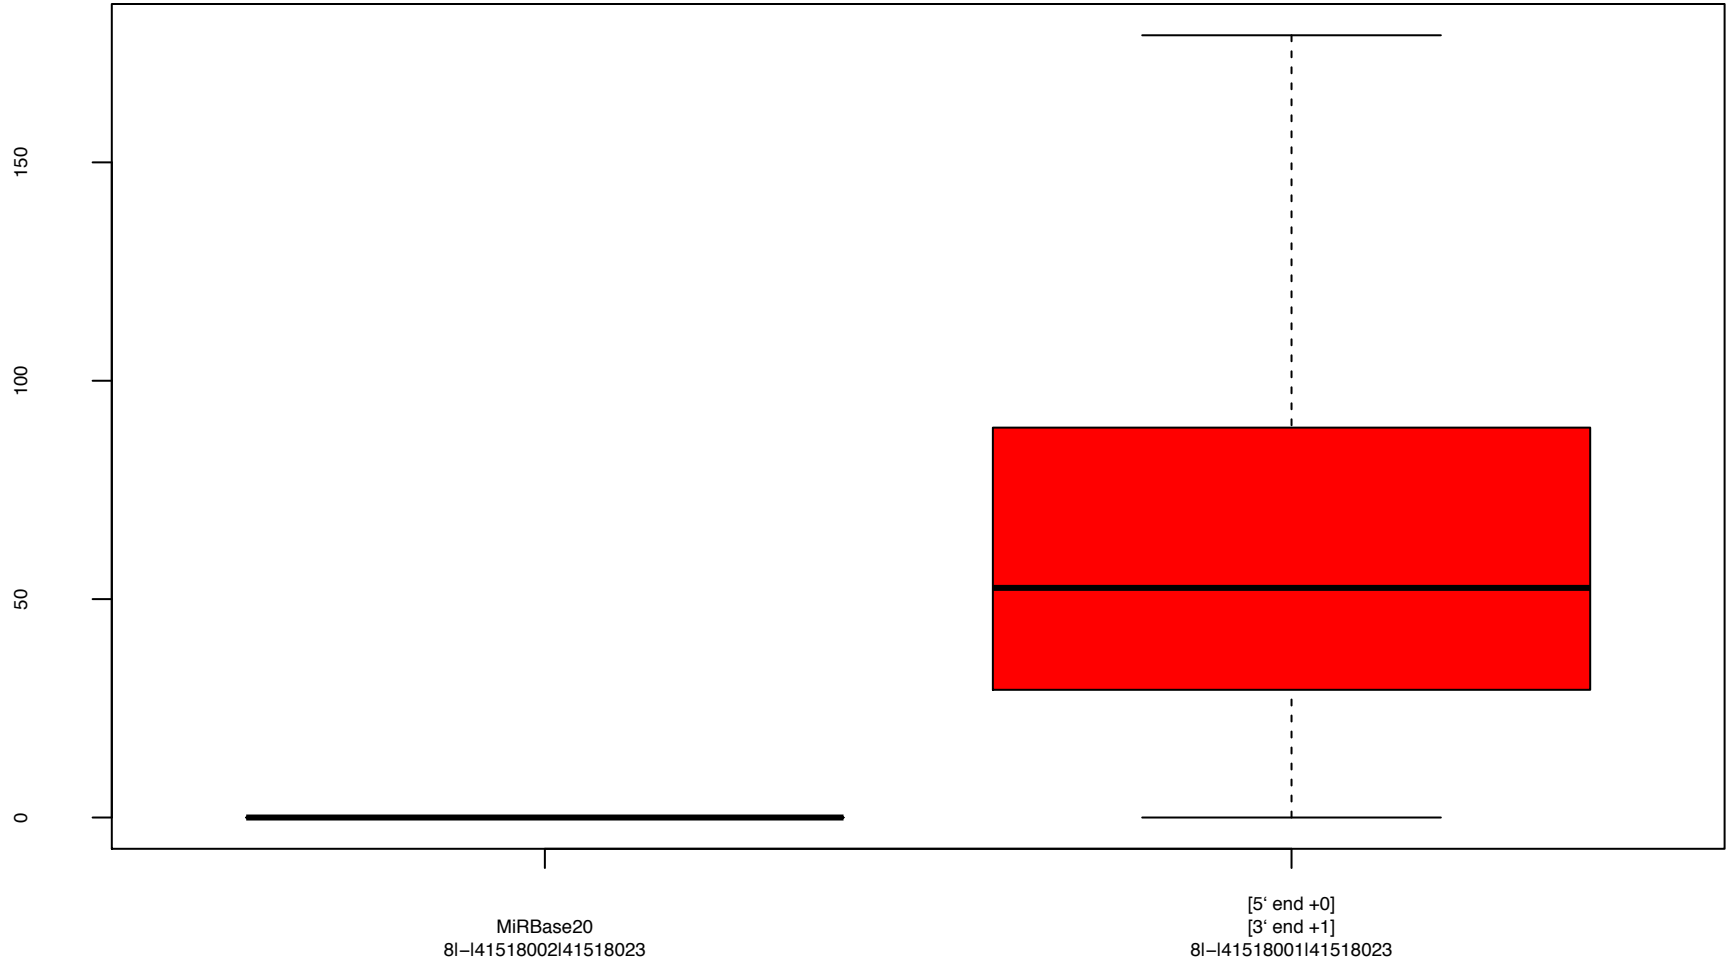

isomiRs

# MIMAT0003322=hsa-miR-652-3p=MI0003667

Quantile Normalized Counts

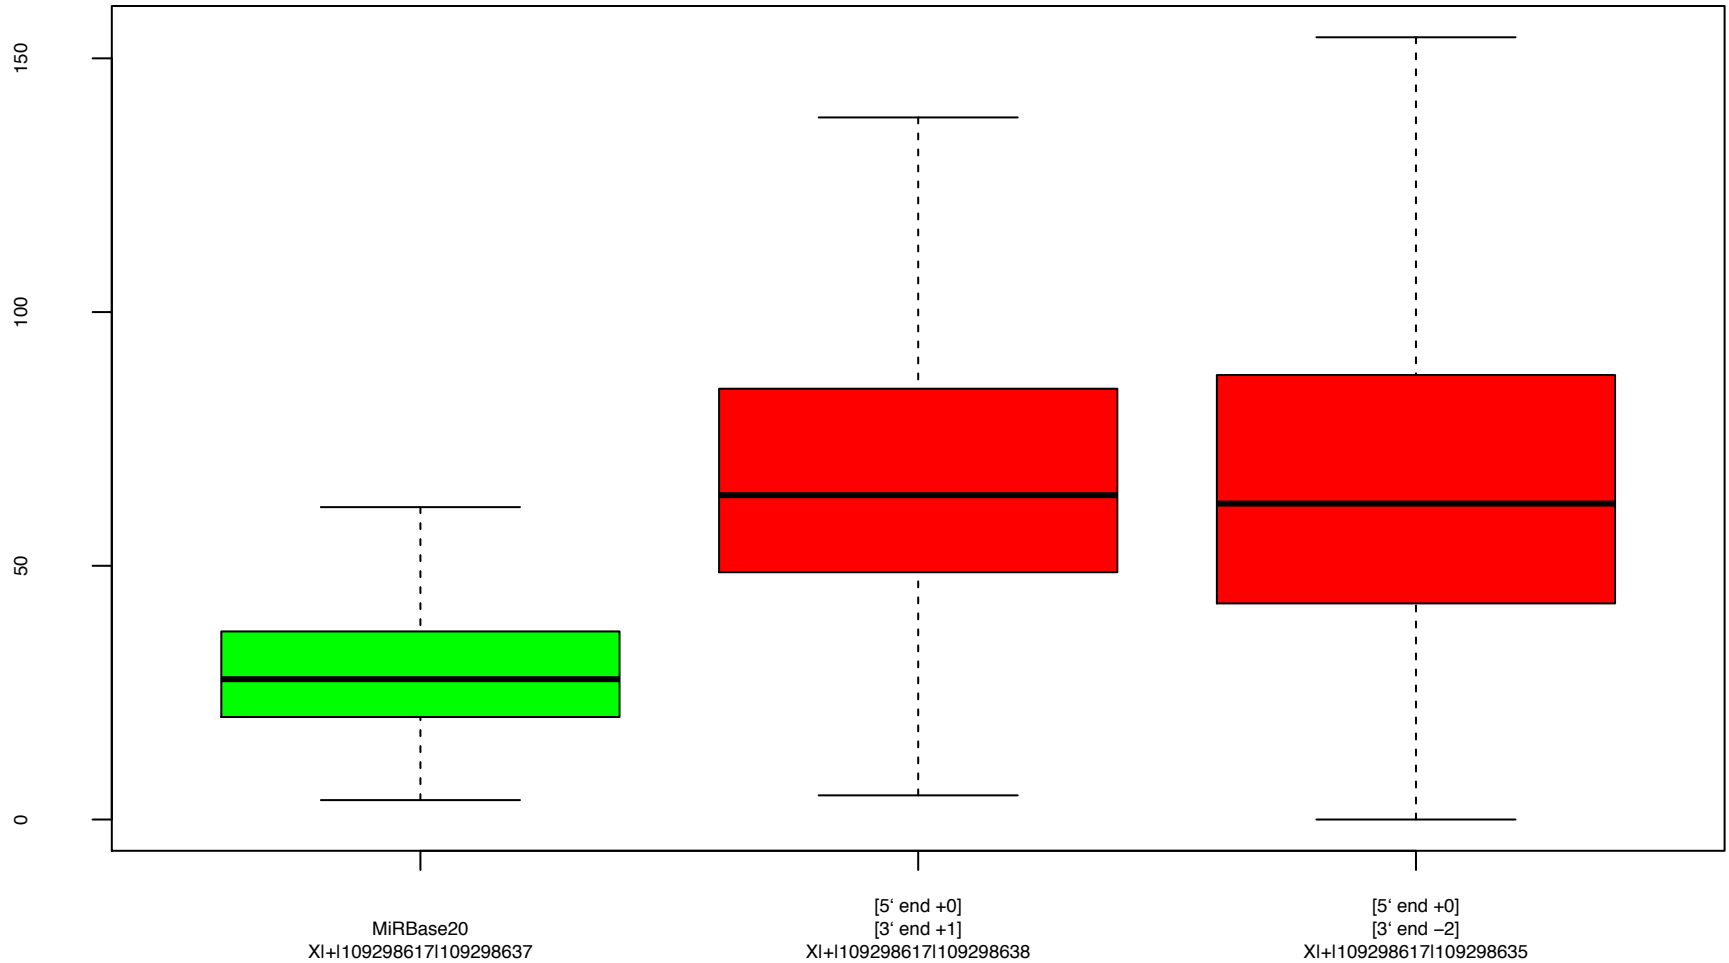

isomiRs

# MIMAT0000072=hsa-miR-18a-5p=MI0000072

Quantile Normalized Counts

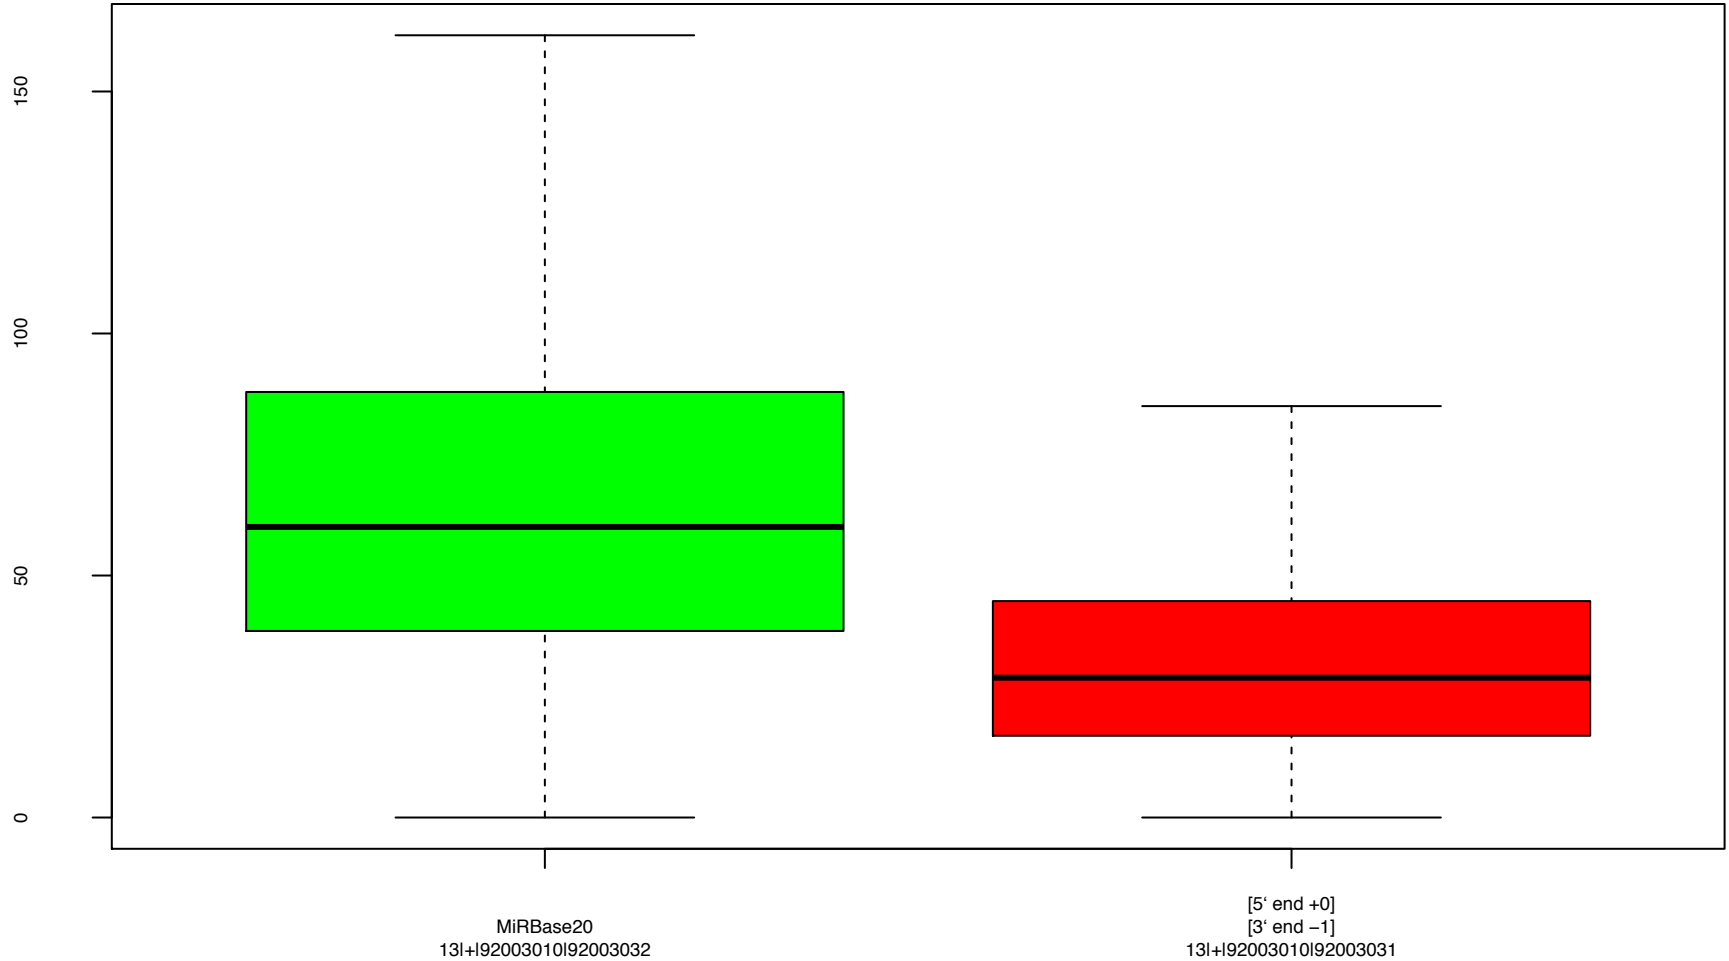

isomiRs

# MIMAT0004585=hsa-let-7i-3p=MI0000434

Quantile Normalized Counts

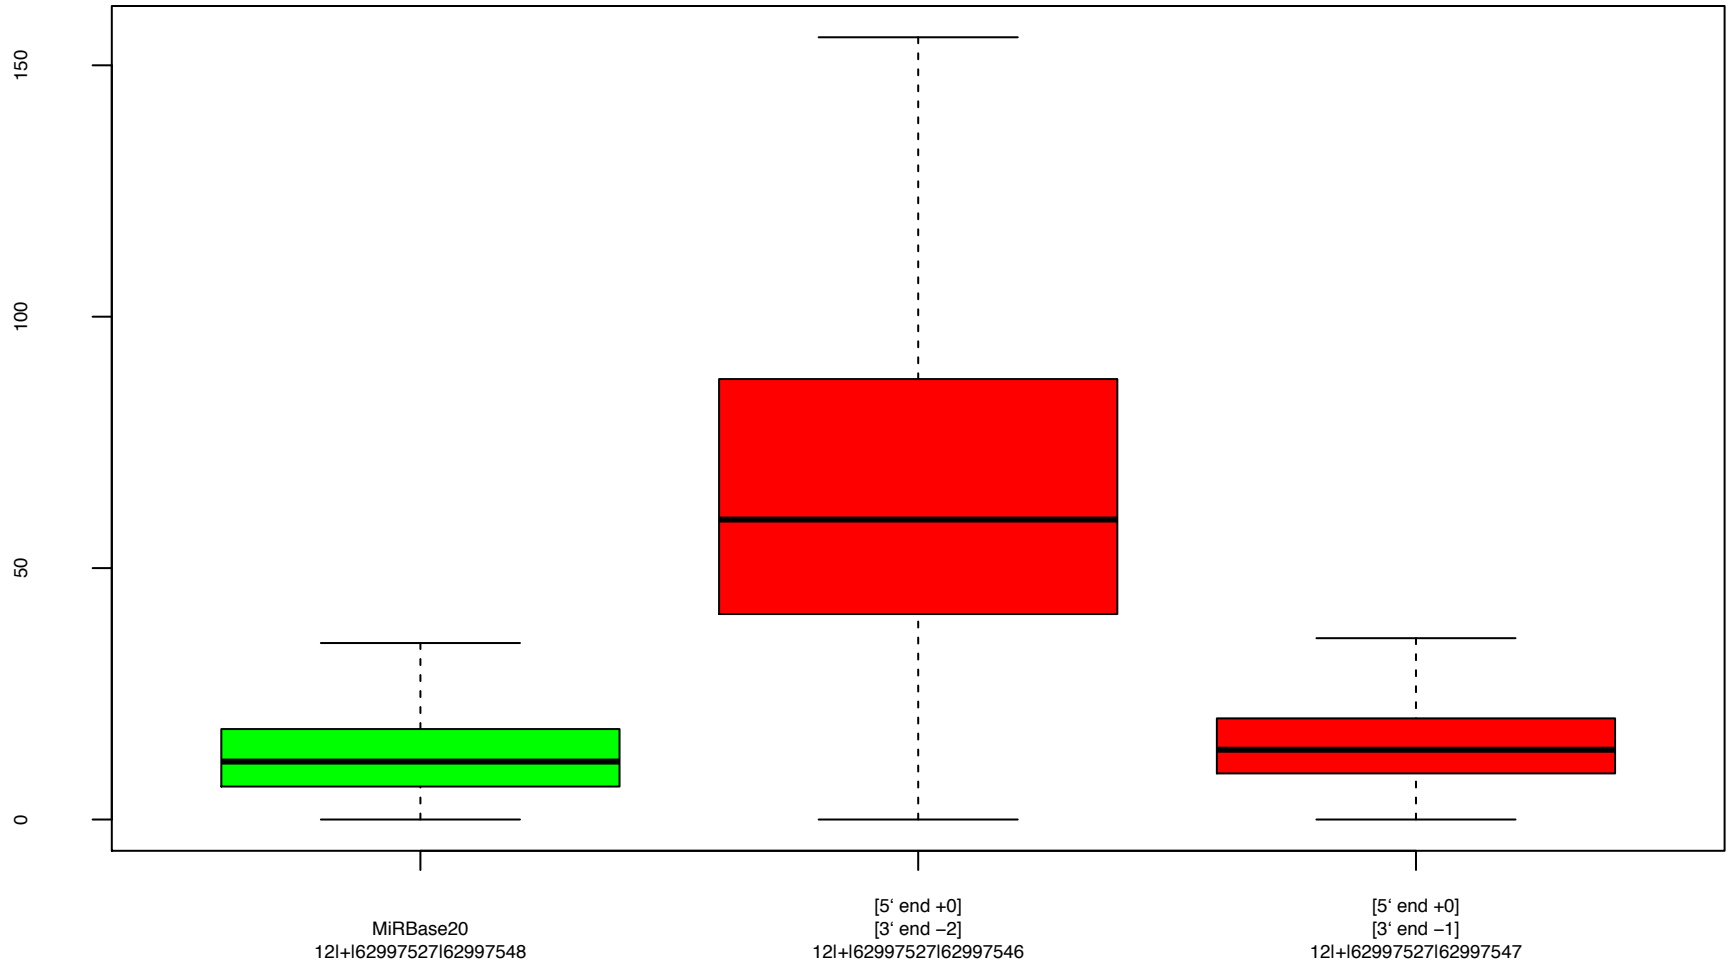

isomiRs



# MIMAT0000418=hsa-miR-23b-3p=MI0000439

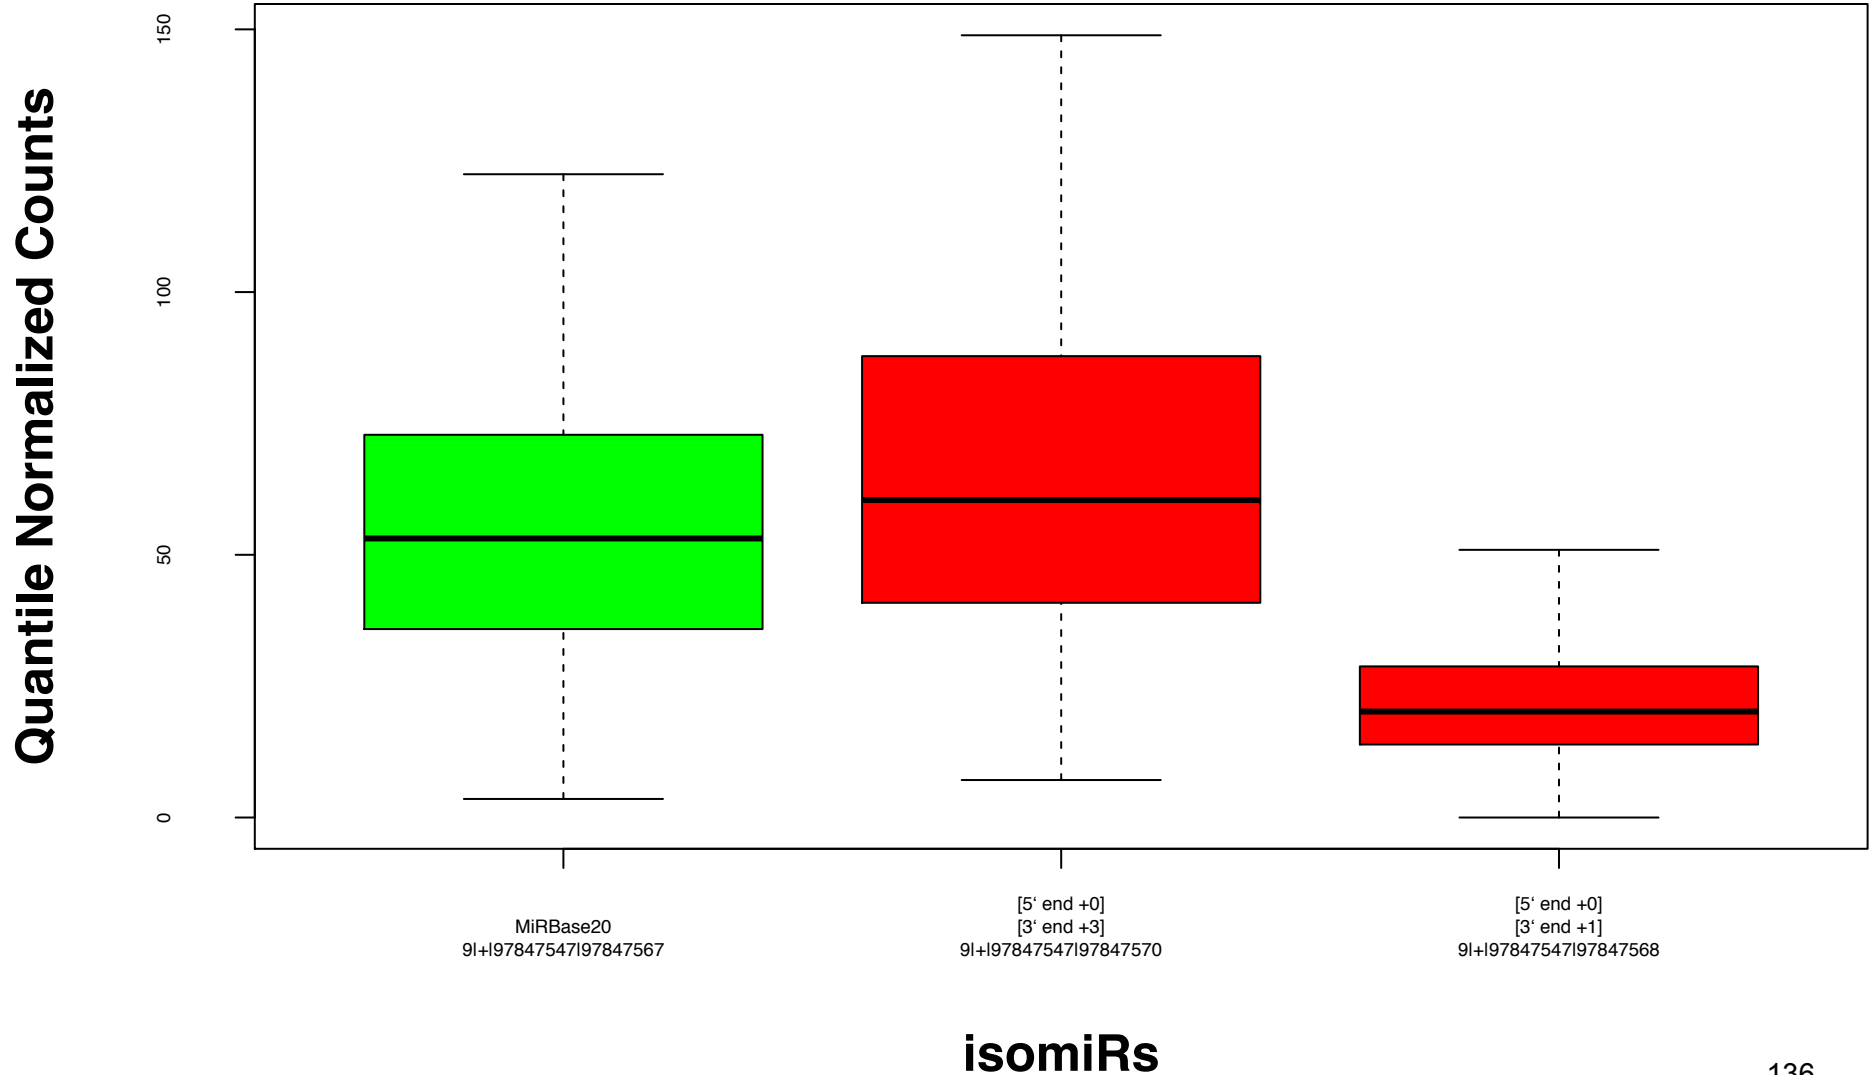

# MIMAT0031180=hsa-miR-7977=MI0025753

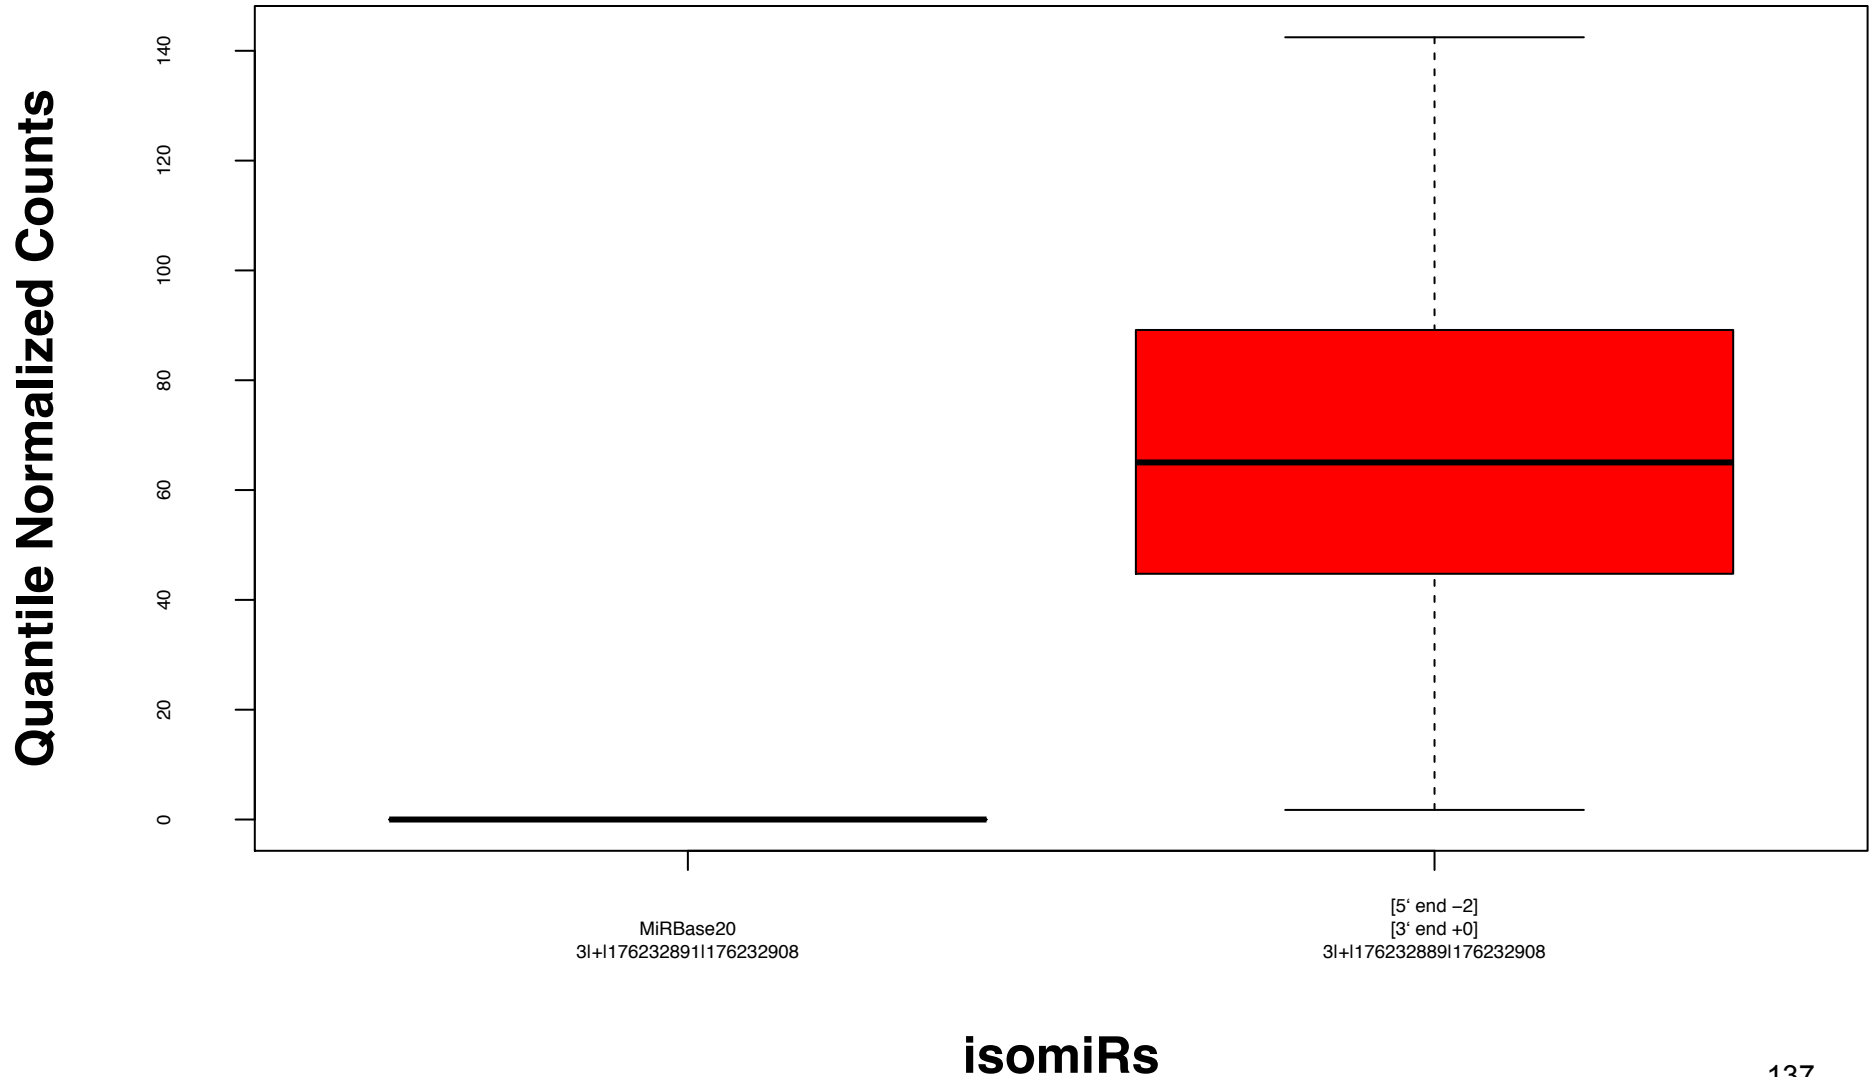

# MIMAT0004498=hsa-miR-25-5p=MI0000082

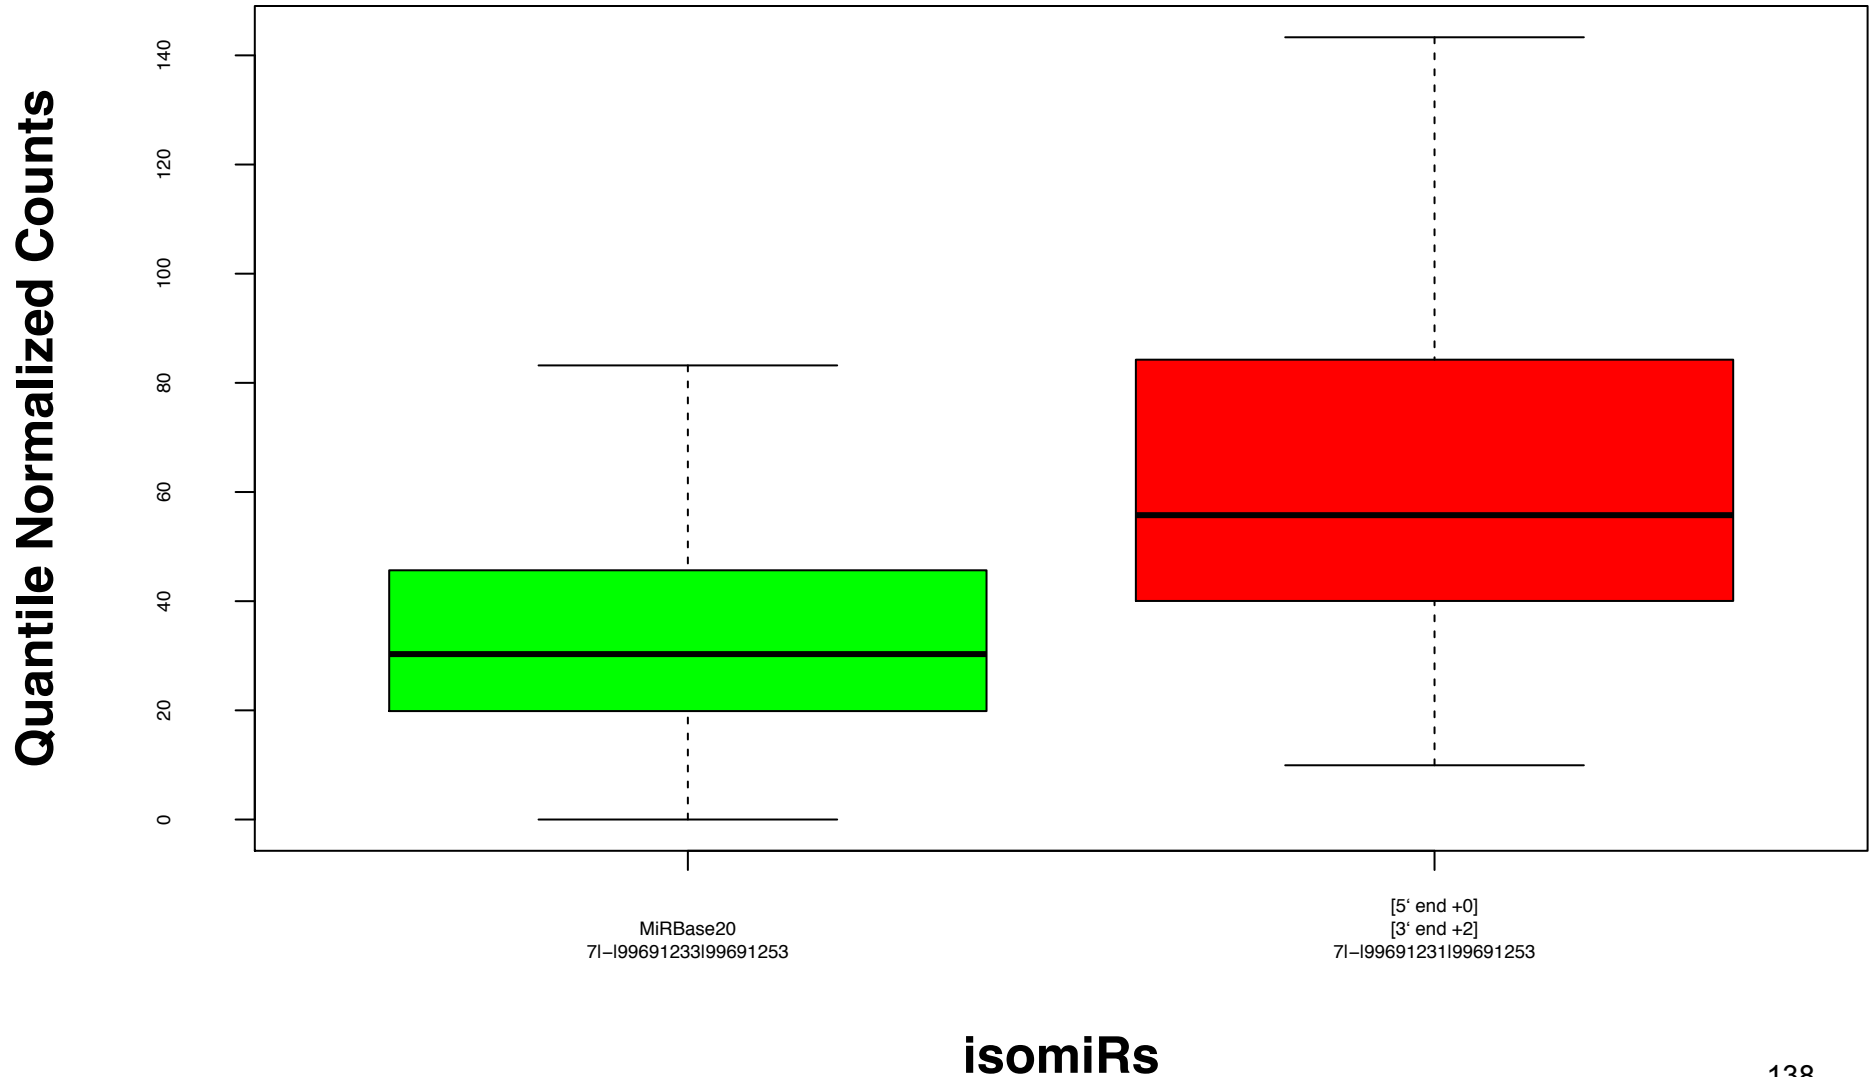

# MIMAT0004749=hsa-miR-424-3p=MI0001446

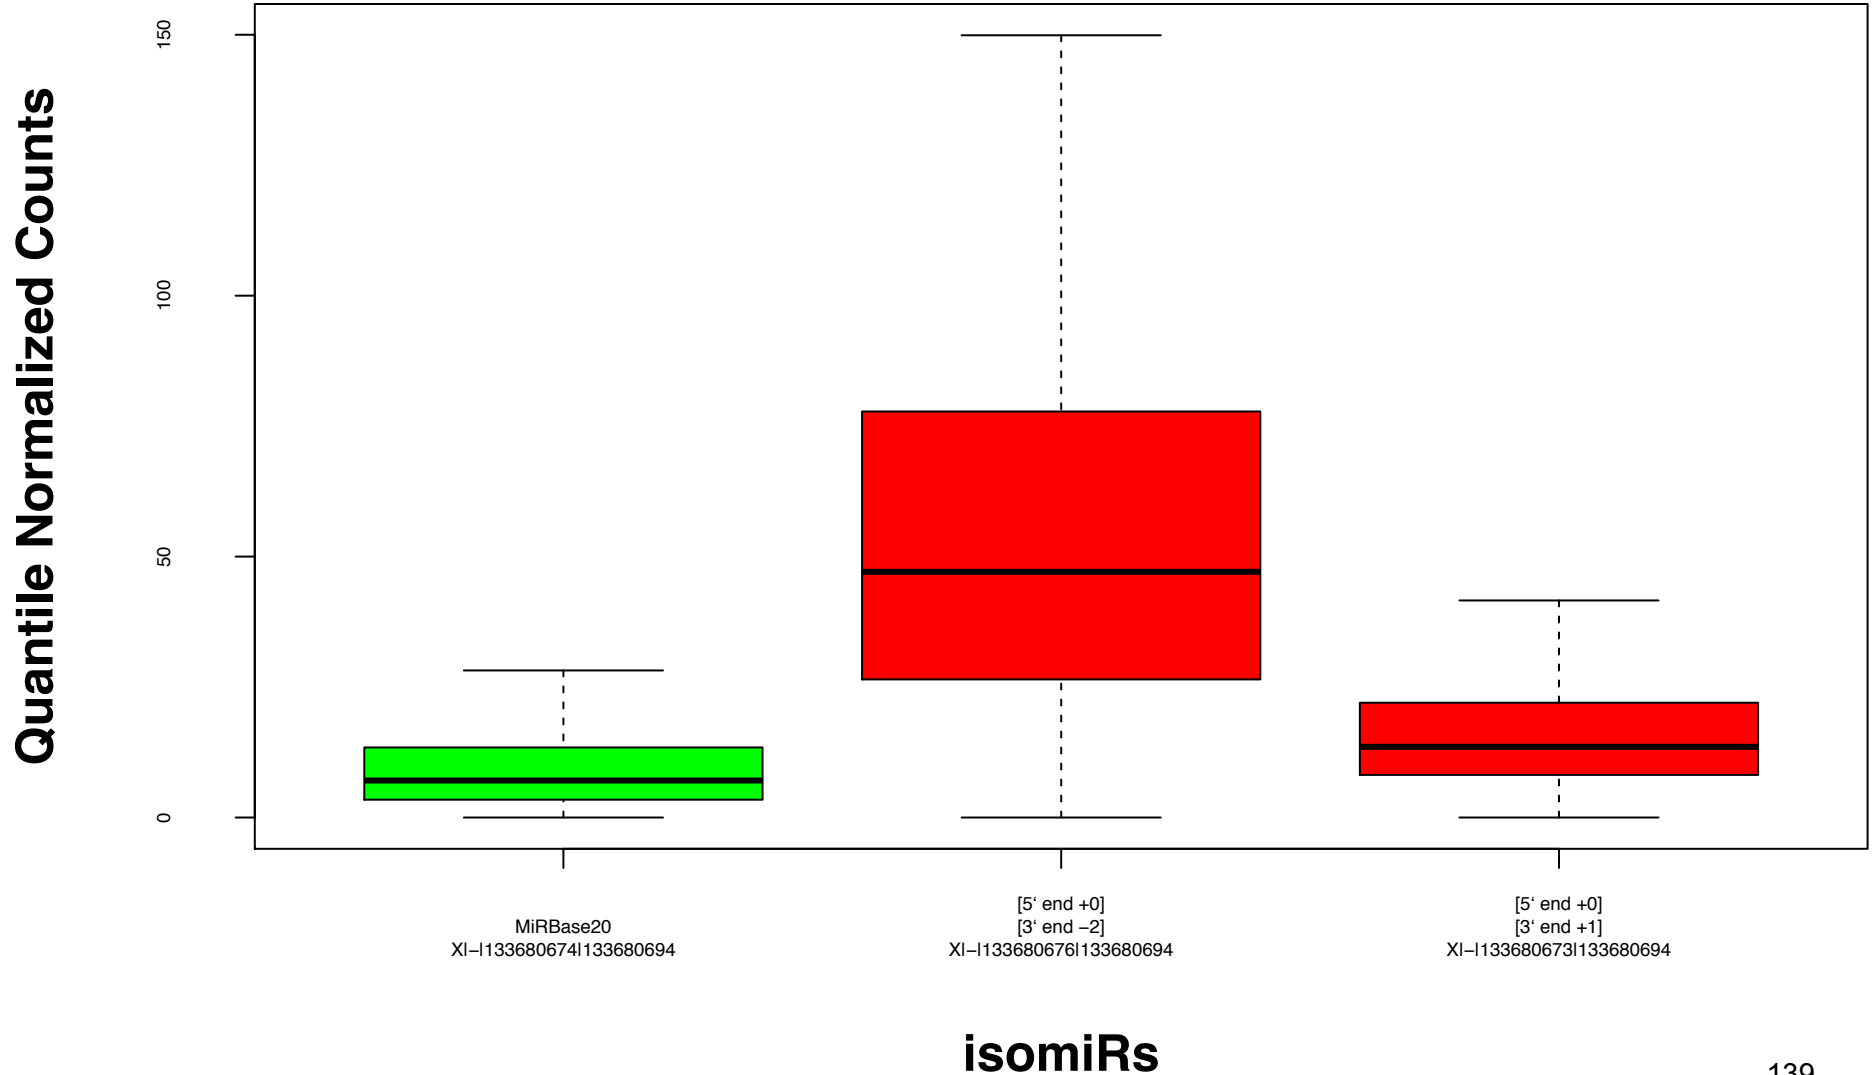

# MIMAT0022720=hsa-miR-1304-3p=MI0006371

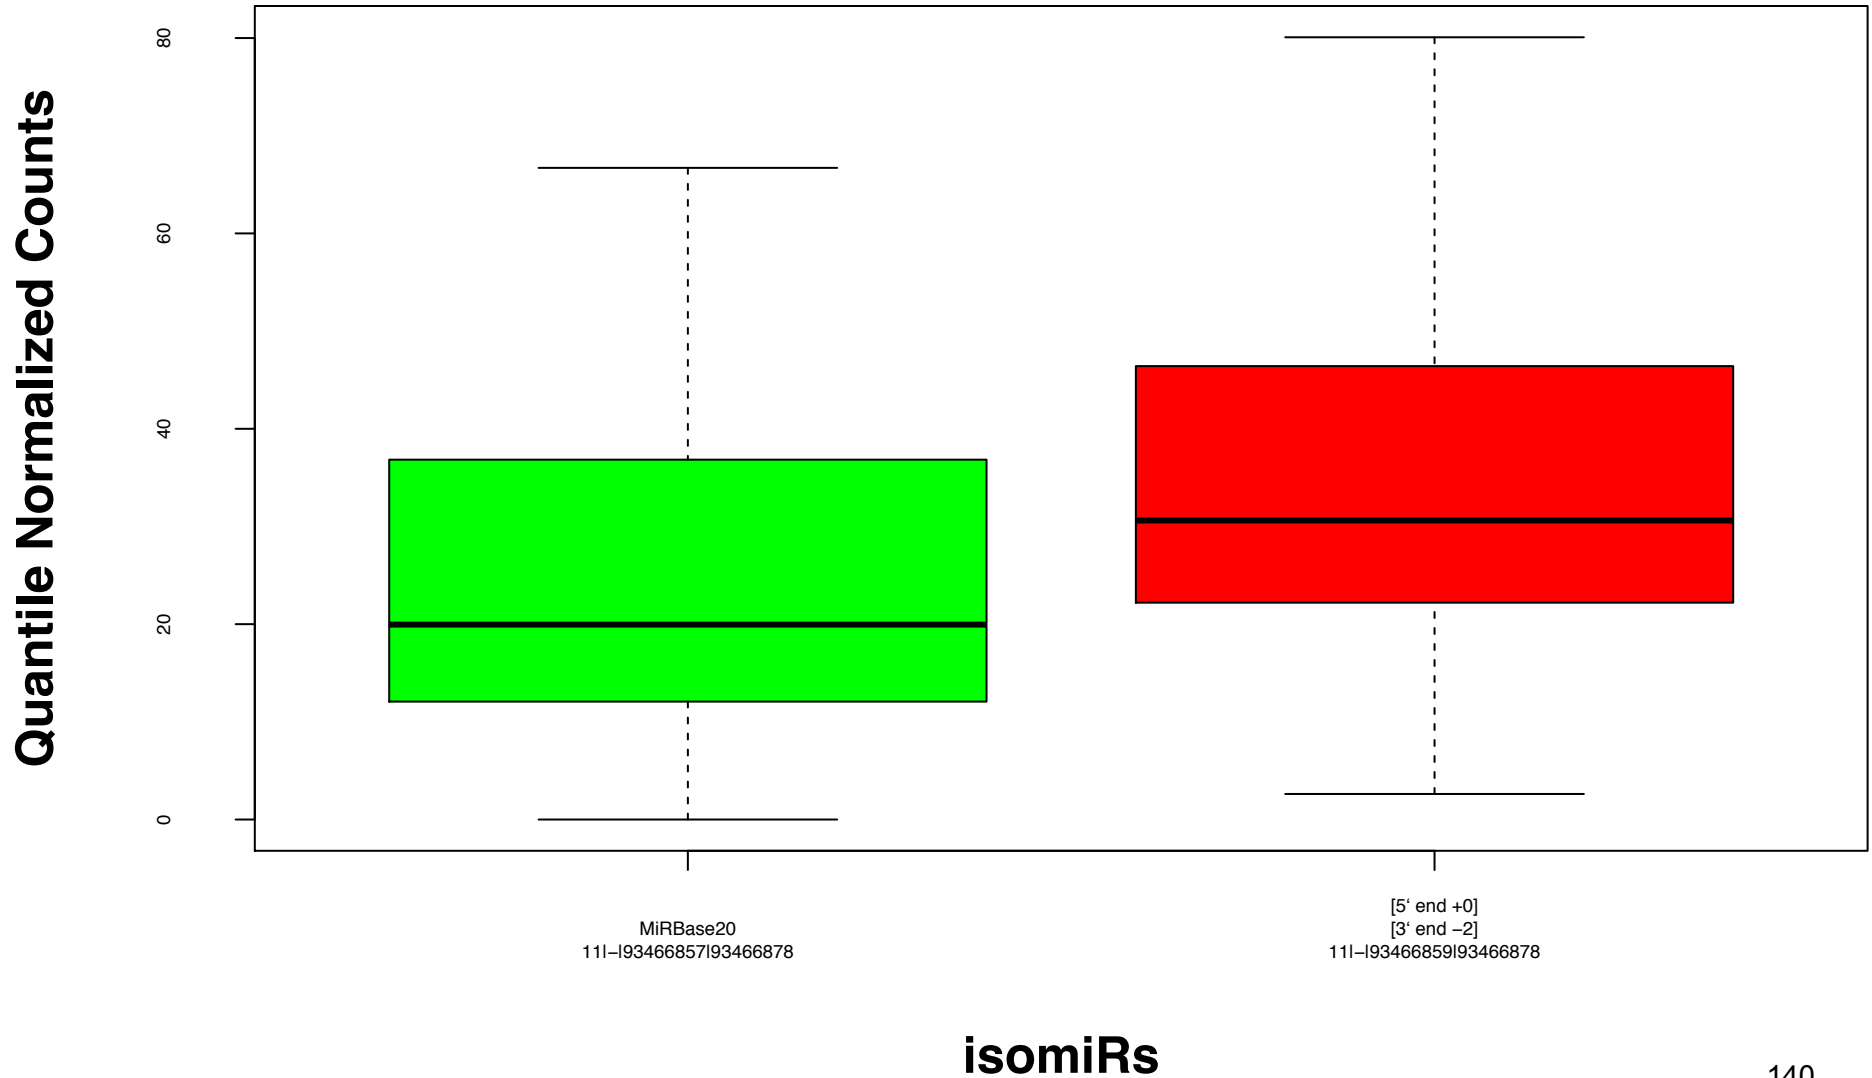

# MIMAT0004496=hsa-miR-23a-5p=MI0000079

Quantile Normalized Counts

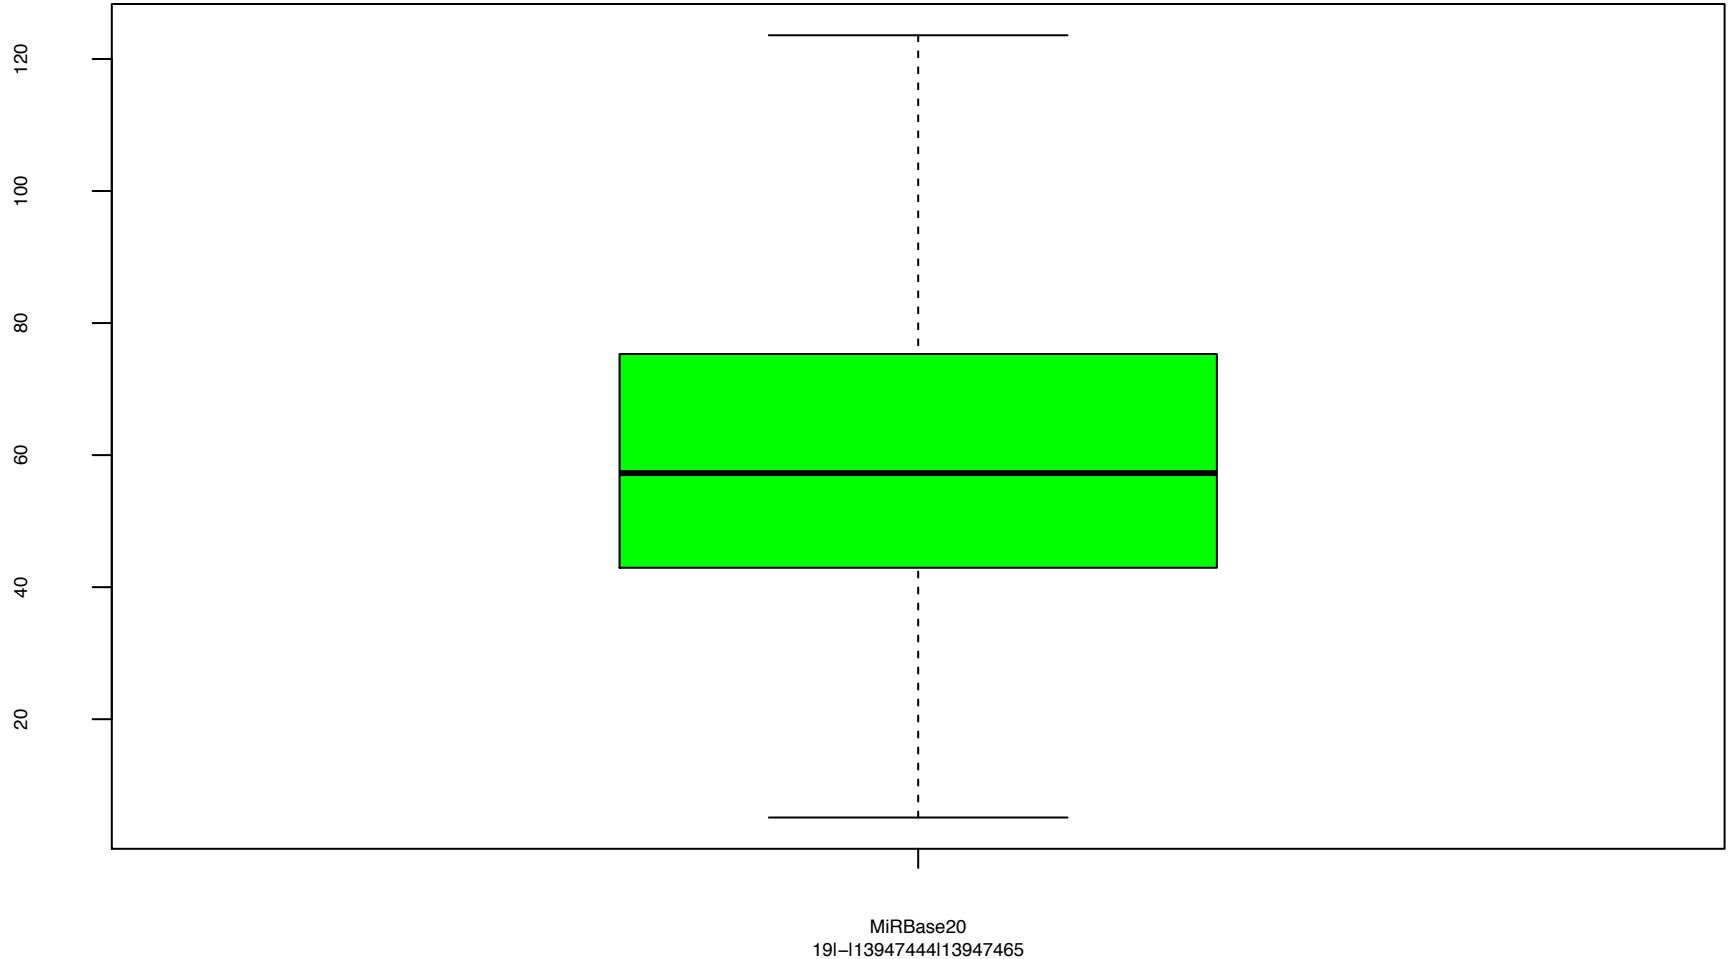

MiRBase20  
19l-113947444|13947465

isomiRs

# MIMAT0005882=hsa-miR-548k=MI0006354

Quantile Normalized Counts

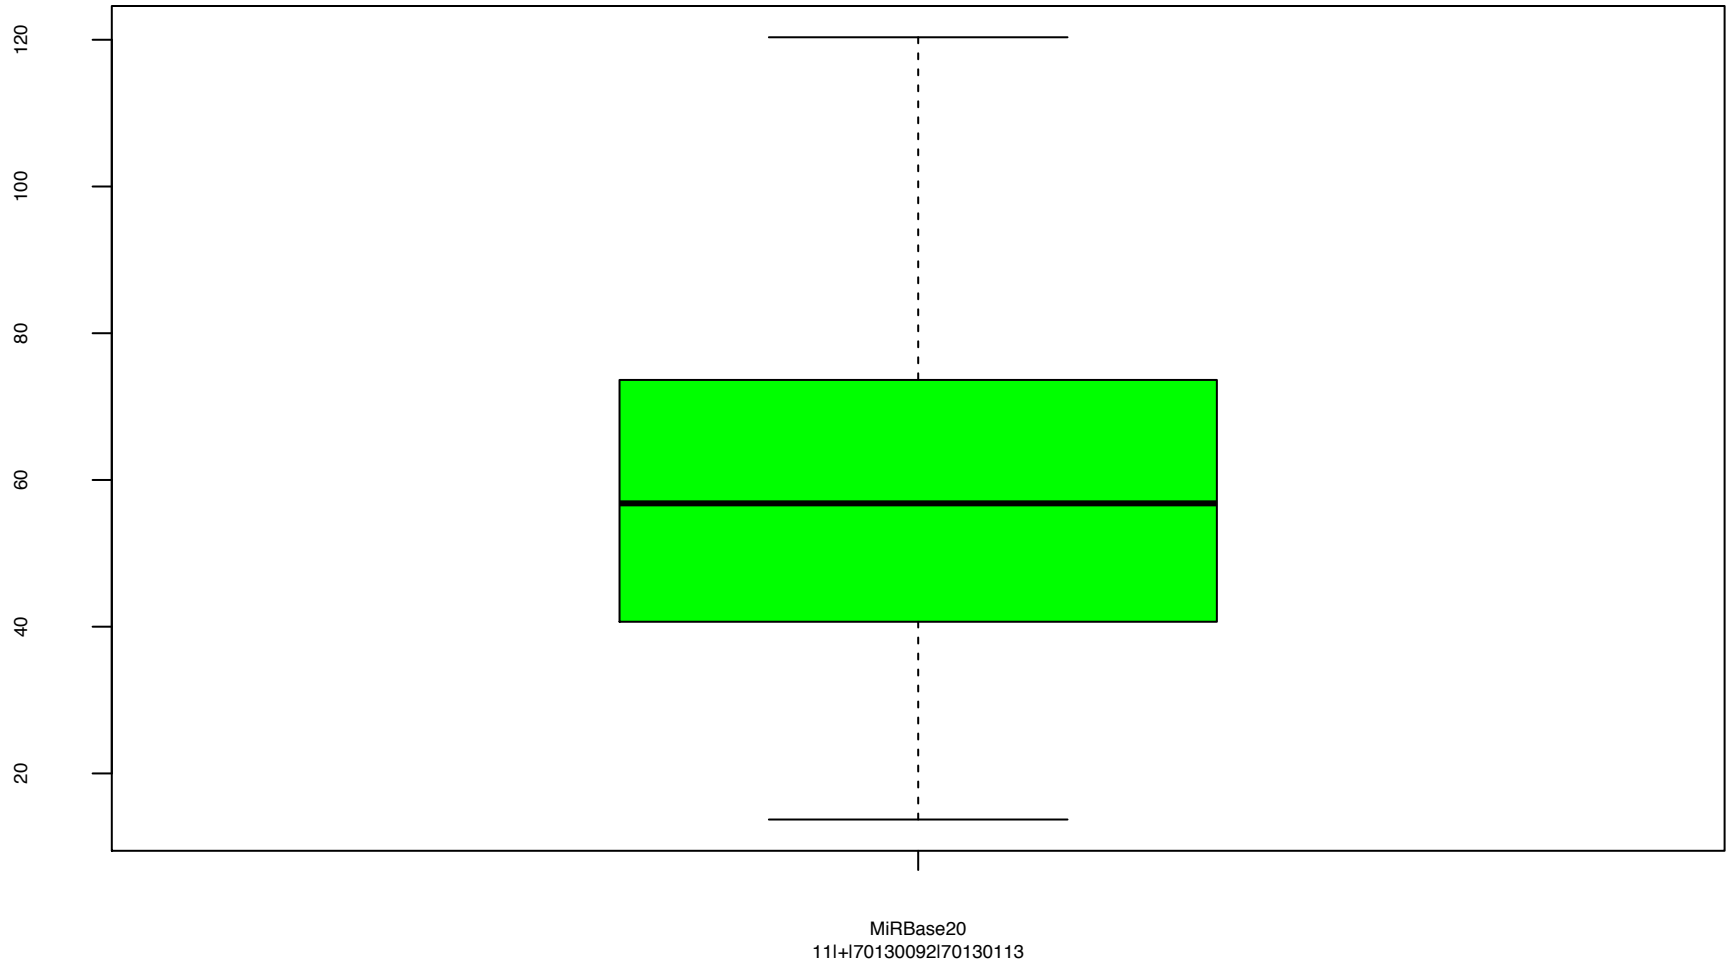

isomiRs

# MIMAT0004774=hsa-miR-501-3p=MI0003185

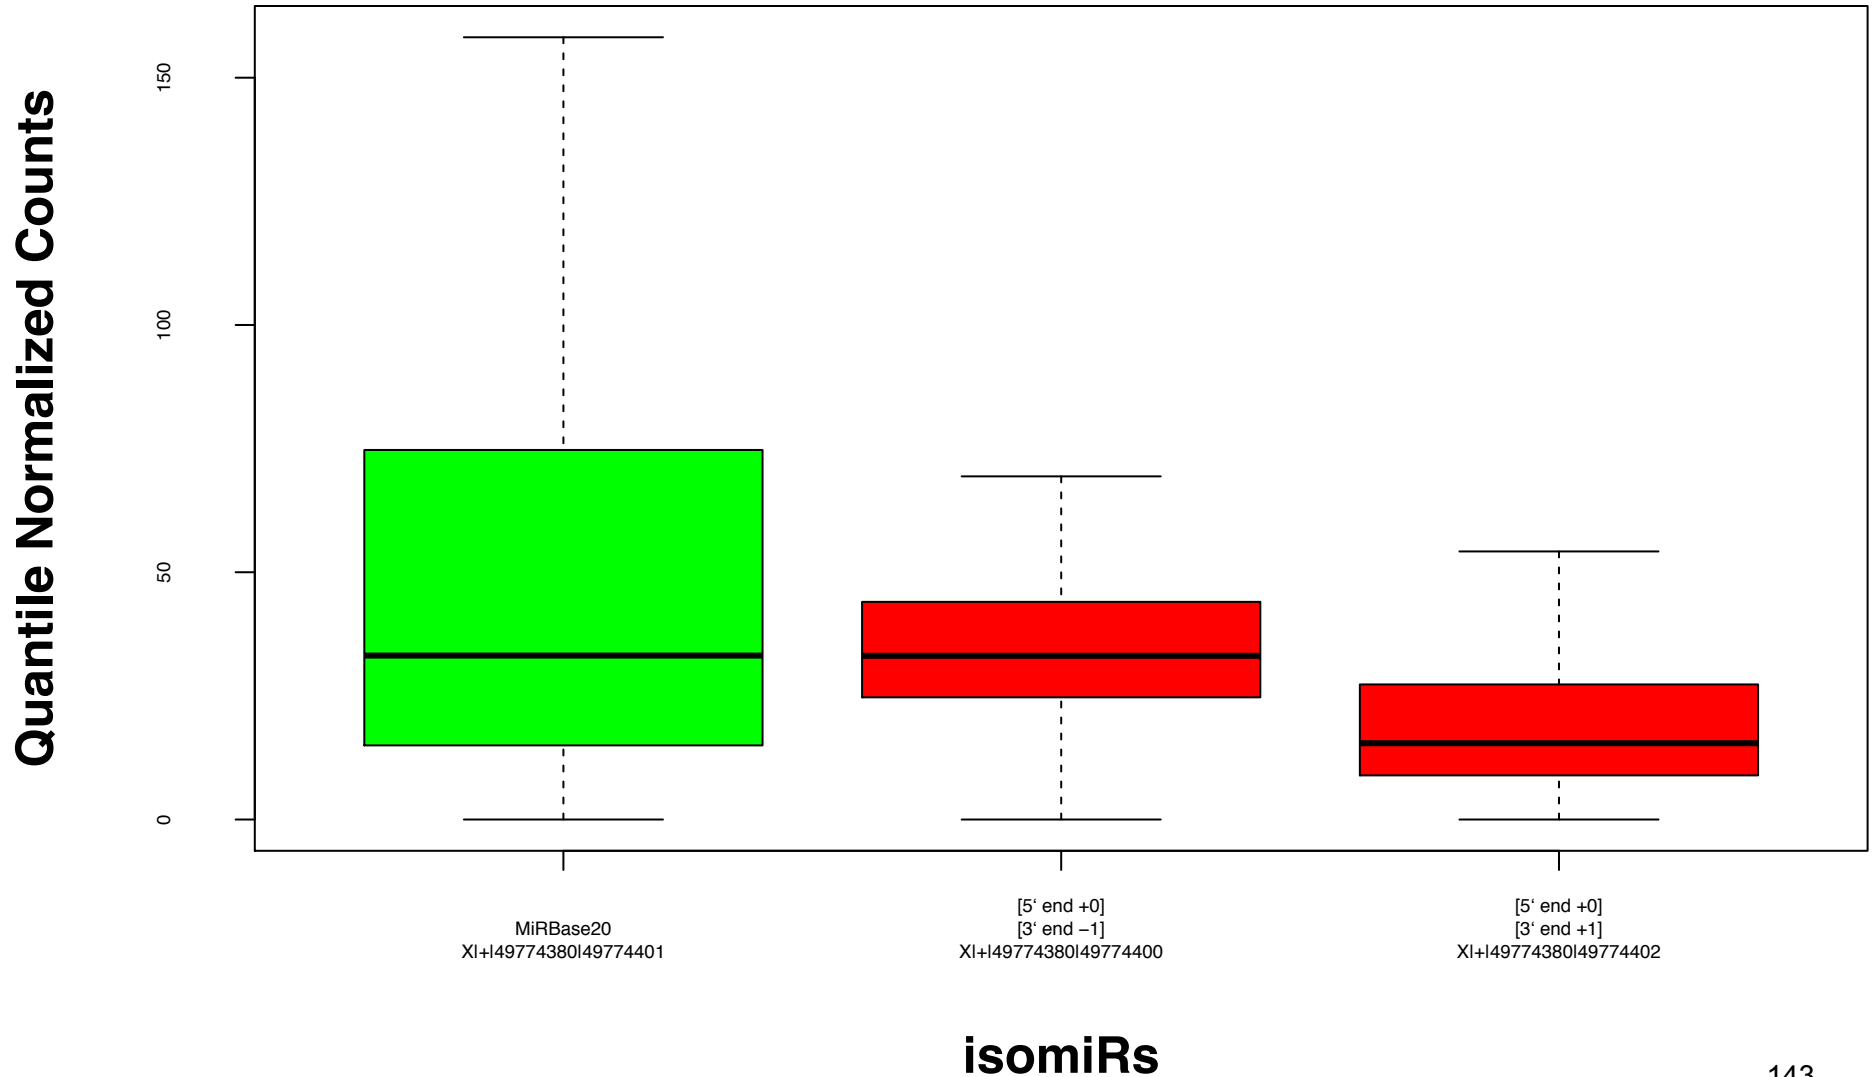



# MIMAT0000617=hsa-miR-200c-3p=MI0000650

Quantile Normalized Counts

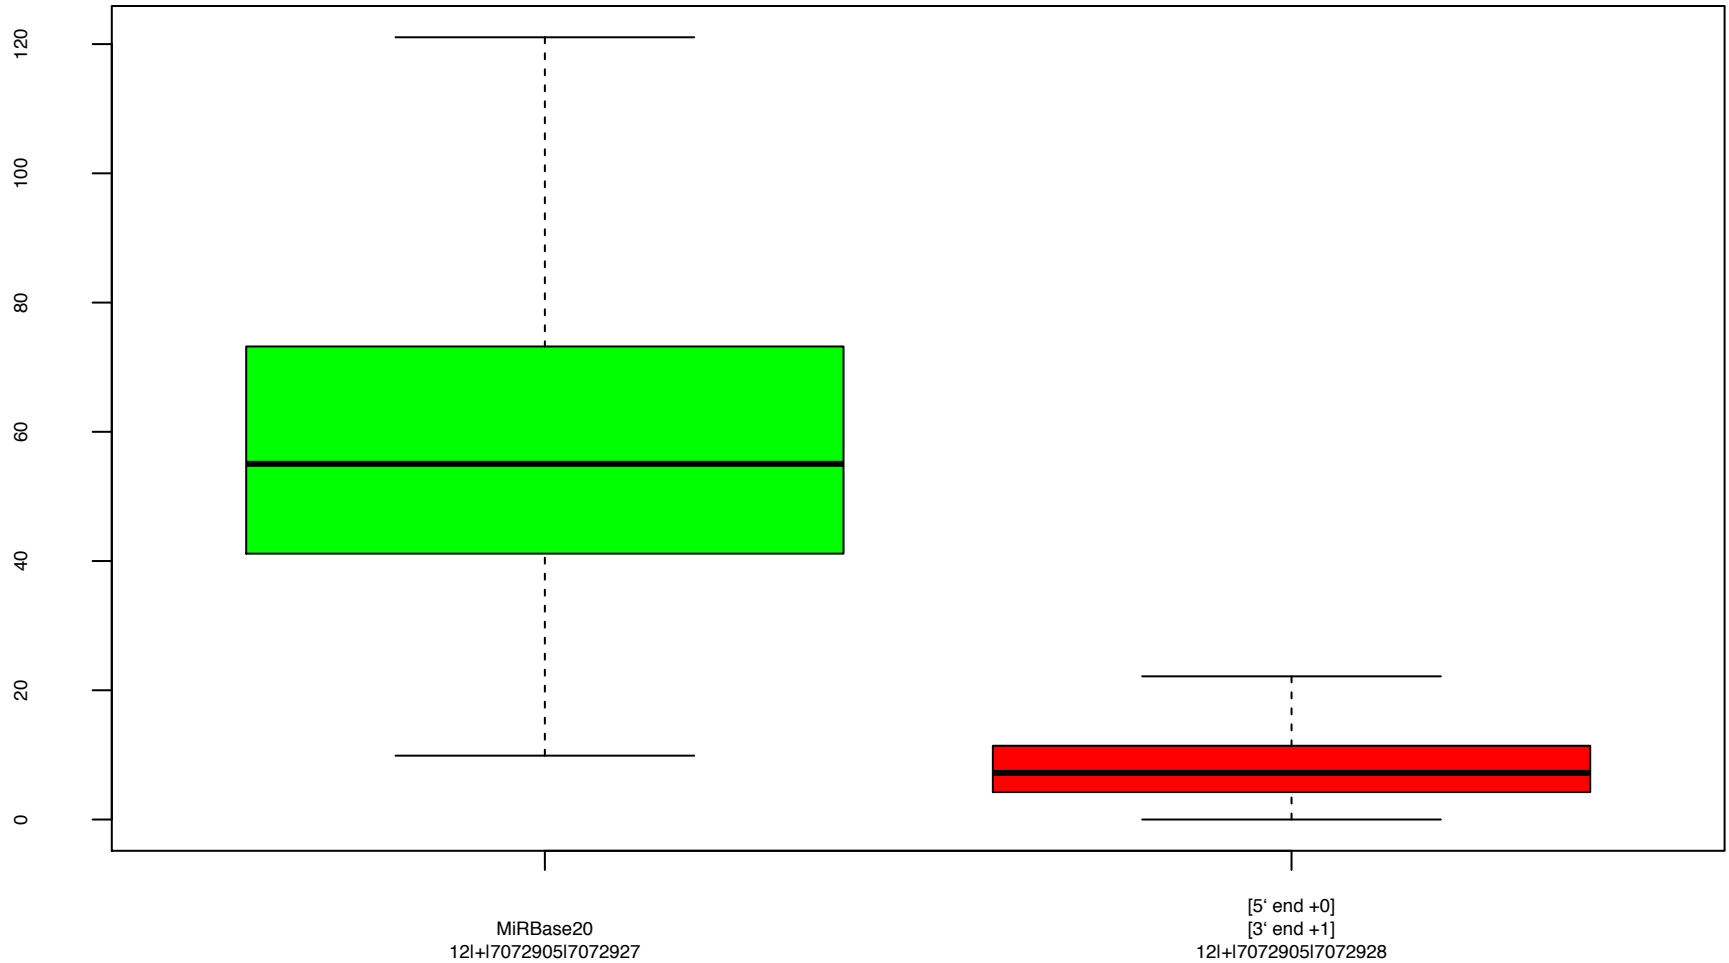

isomiRs

# MIMAT0002891=hsa-miR-18a-3p=MI0000072

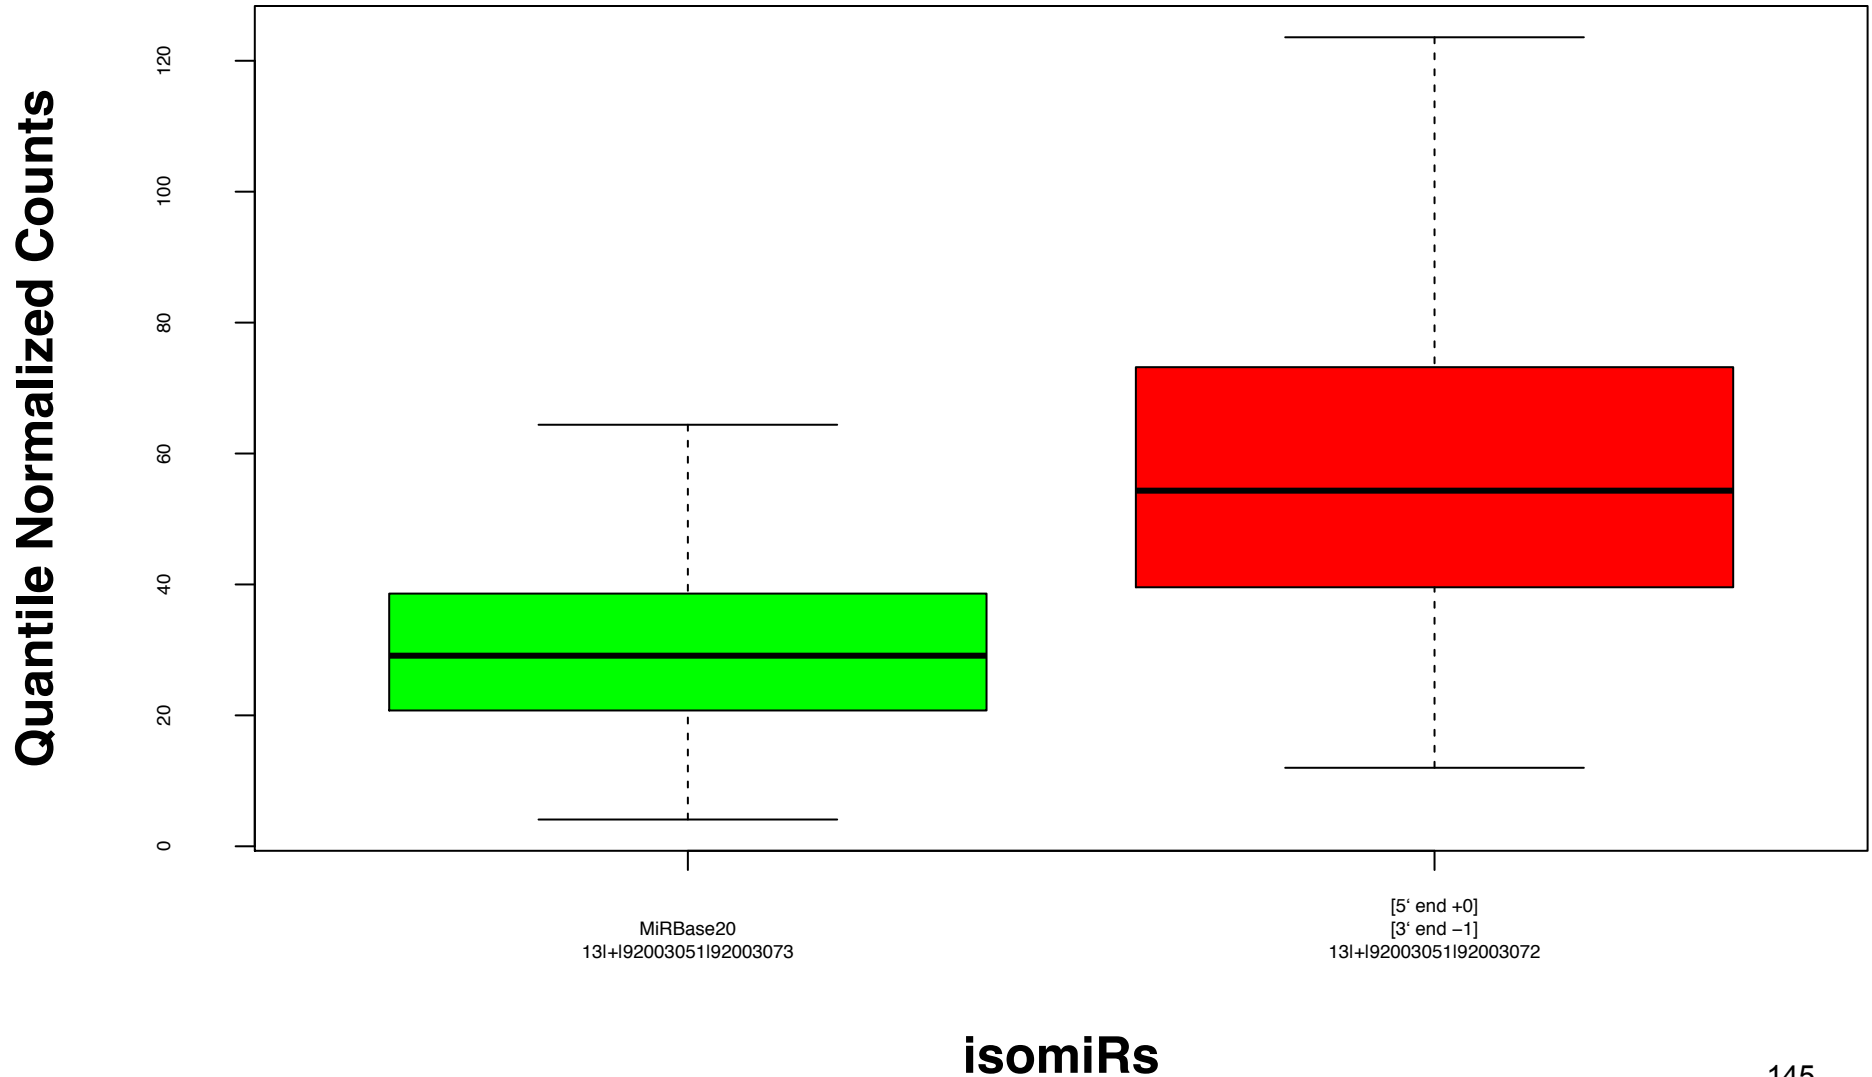

# MIMAT0004810=hsa-miR-629-5p=MI0003643

Quantile Normalized Counts

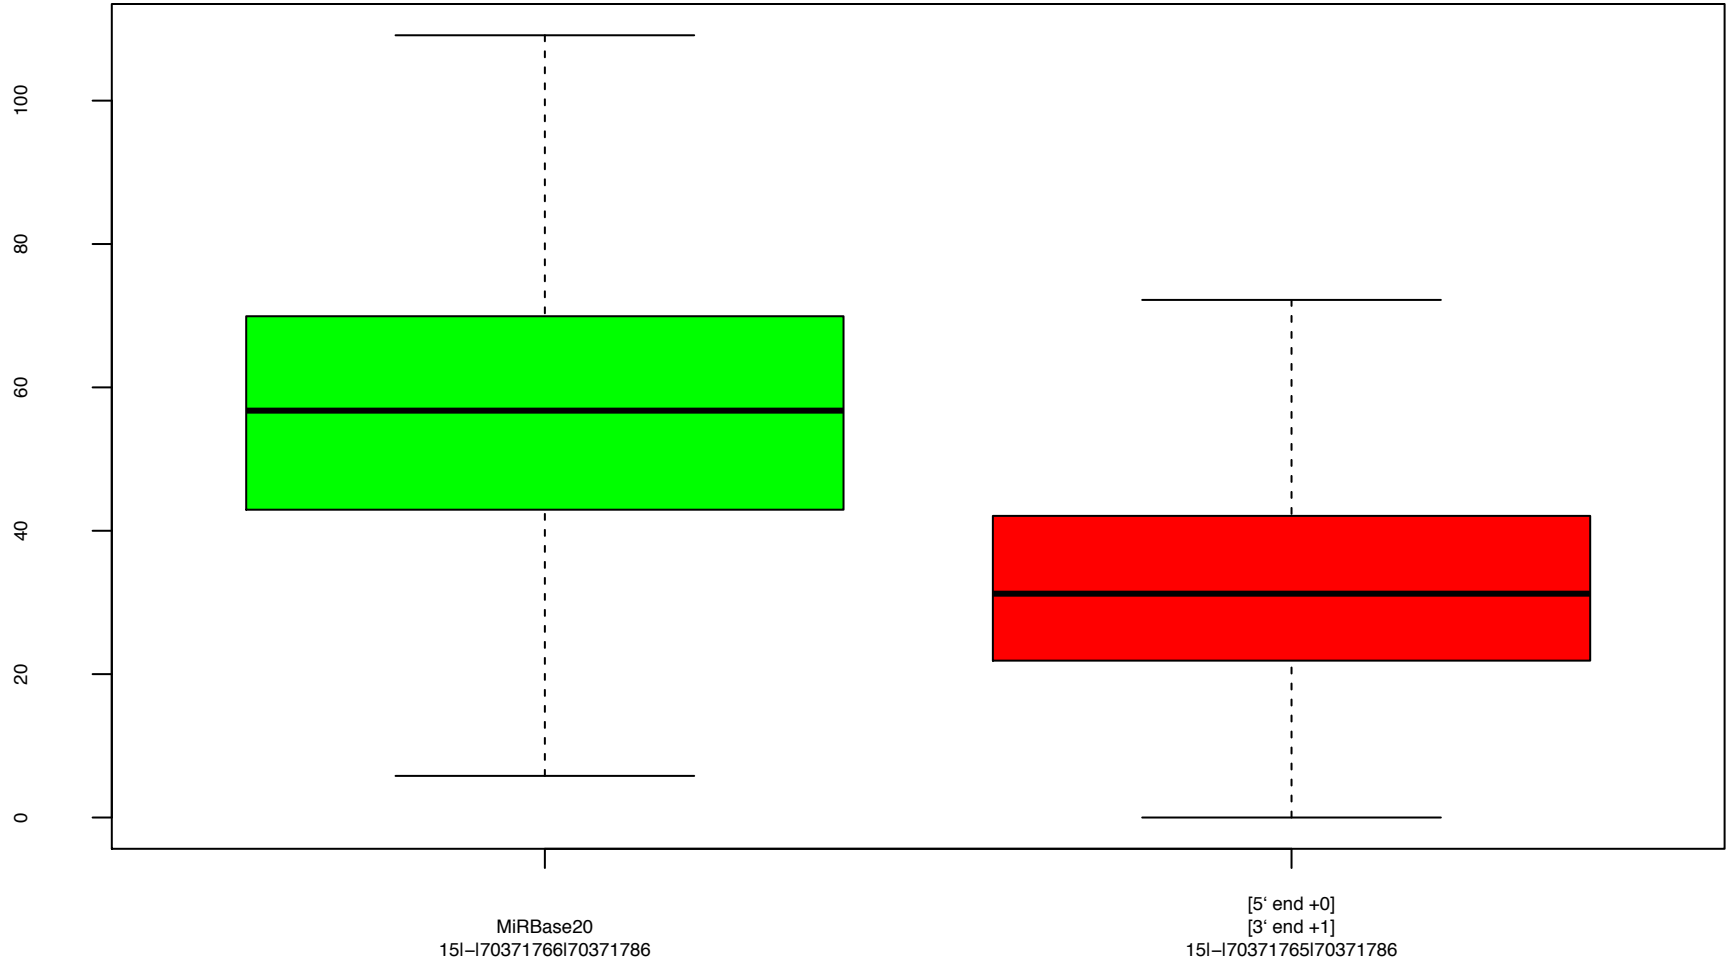

isomiRs

# MIMAT0000705=hsa-miR-362-5p=MI0000762

Quantile Normalized Counts

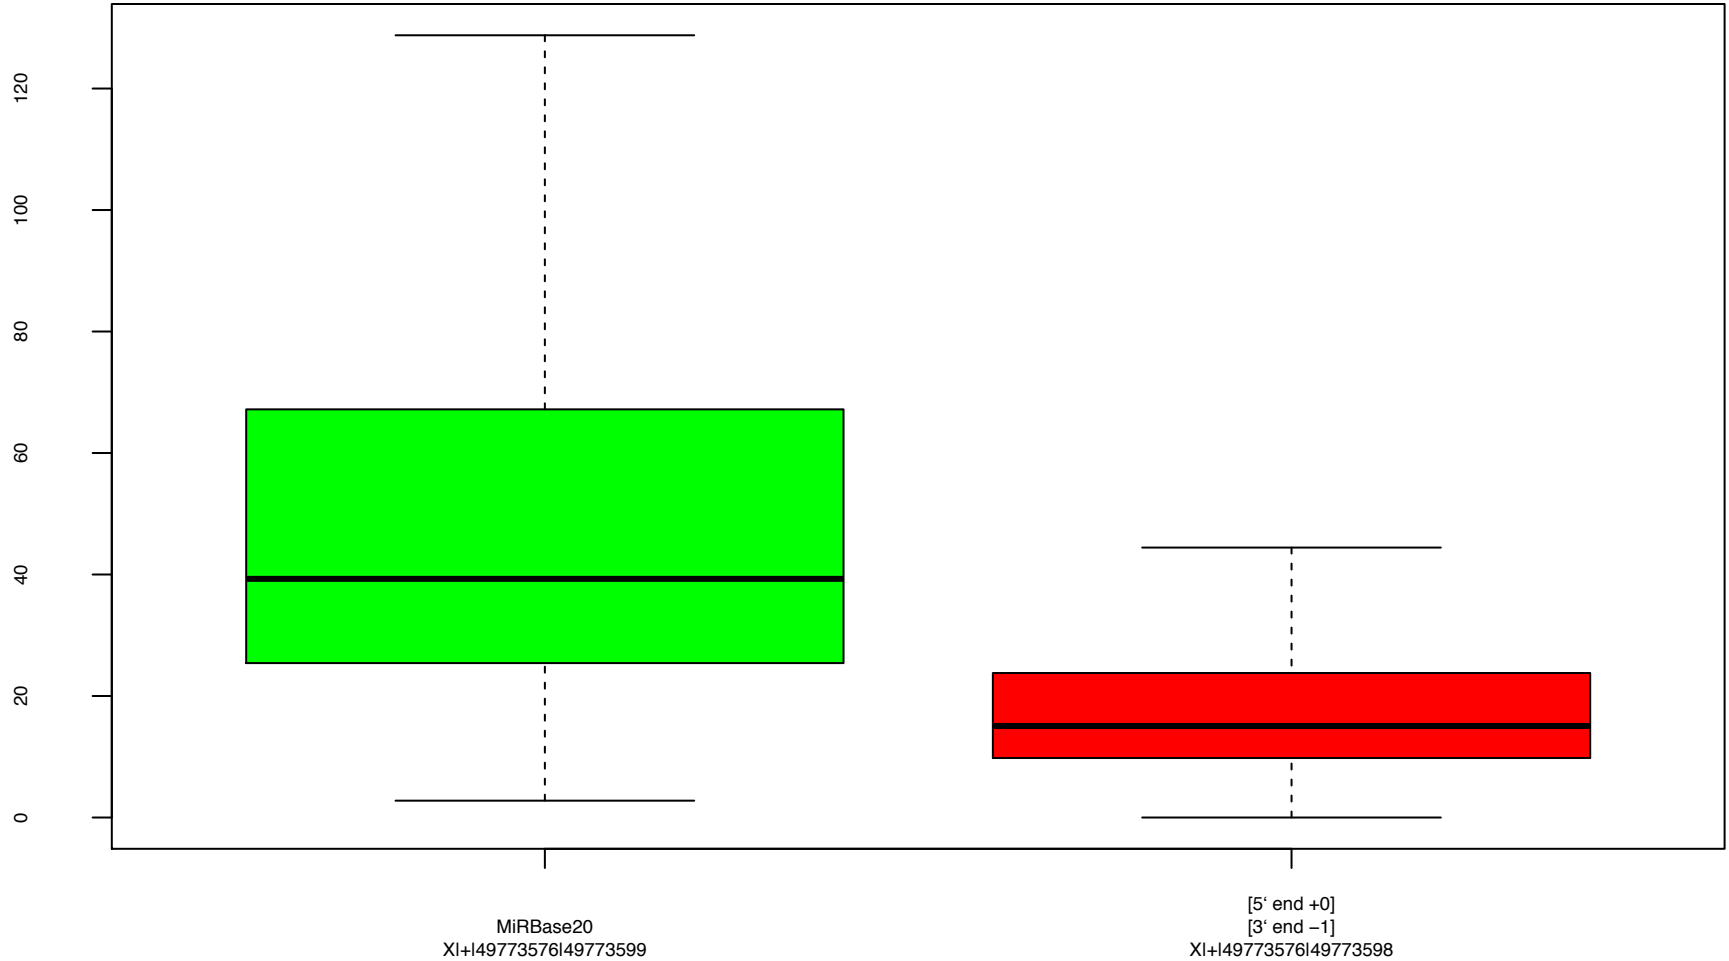

isomiRs

# MIMAT0003241=hsa-miR-576-5p=MI0003583

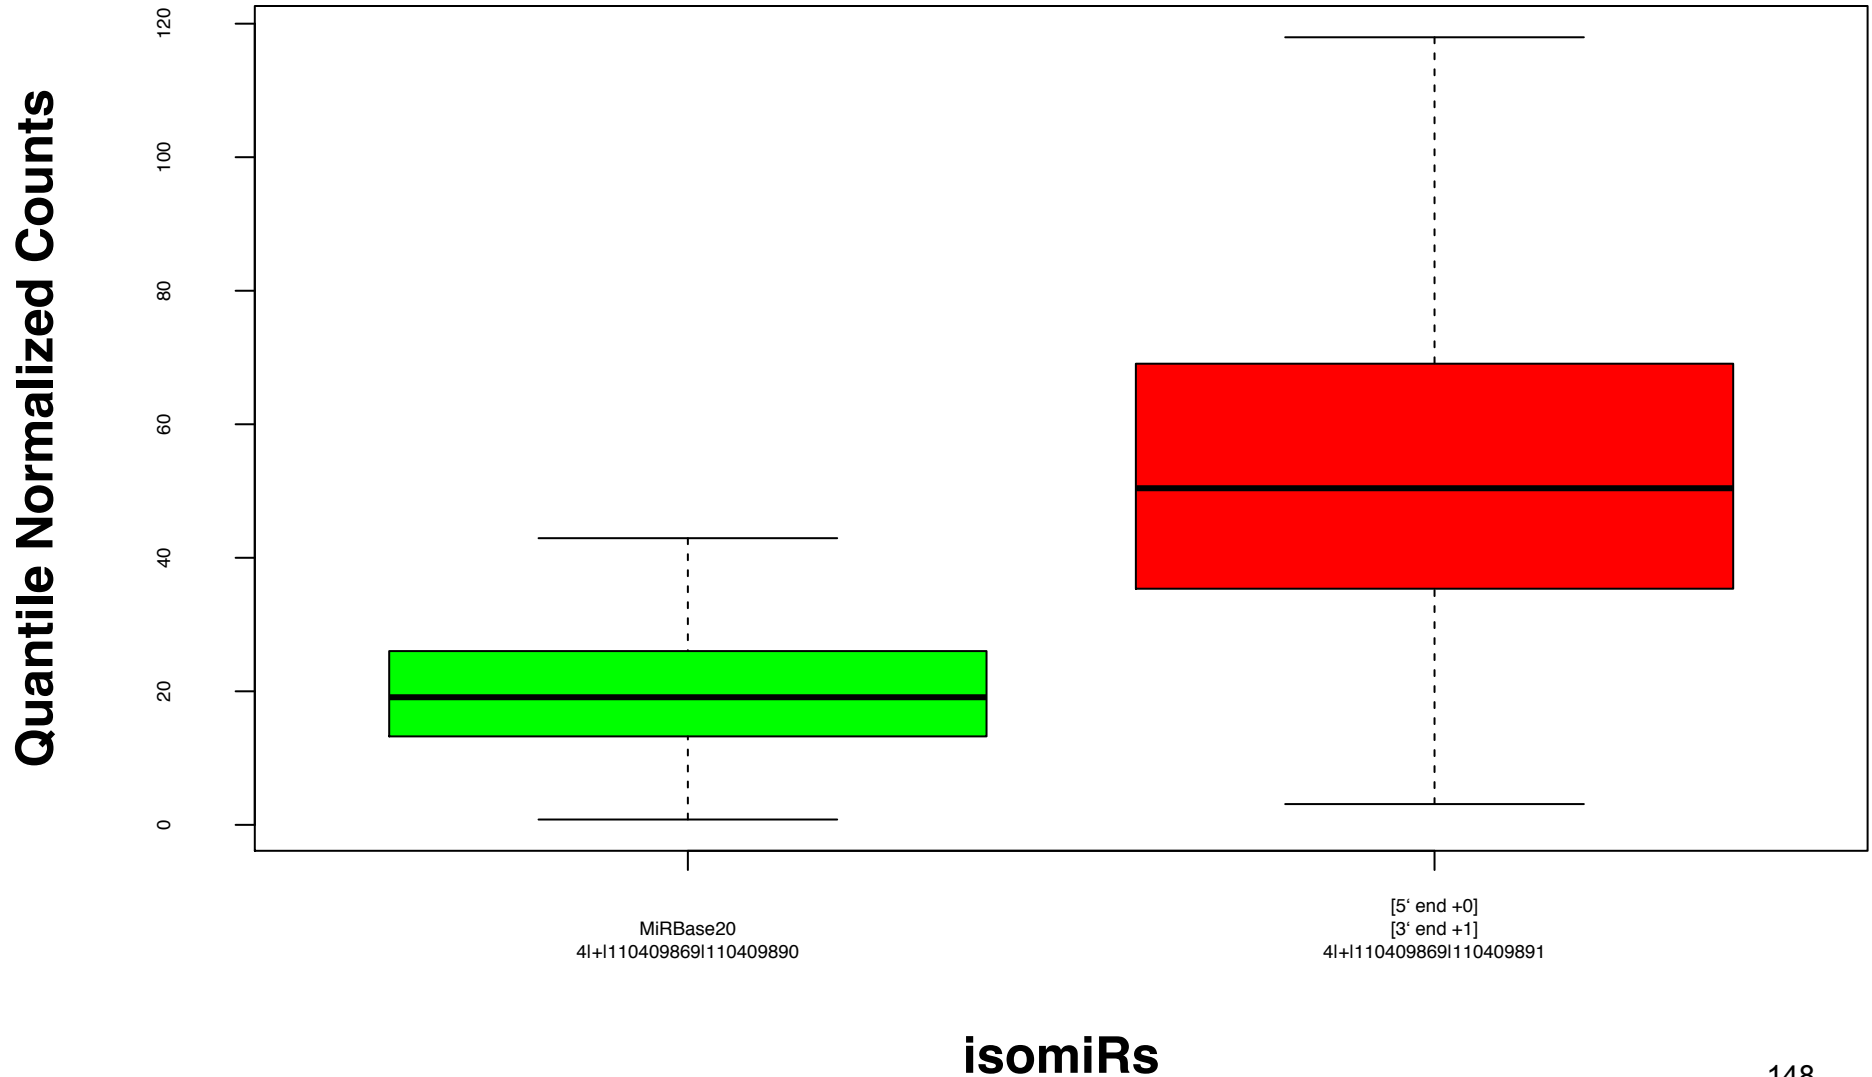

# MIMAT0003239=hsa-miR-574-3p=MI0003581

Quantile Normalized Counts

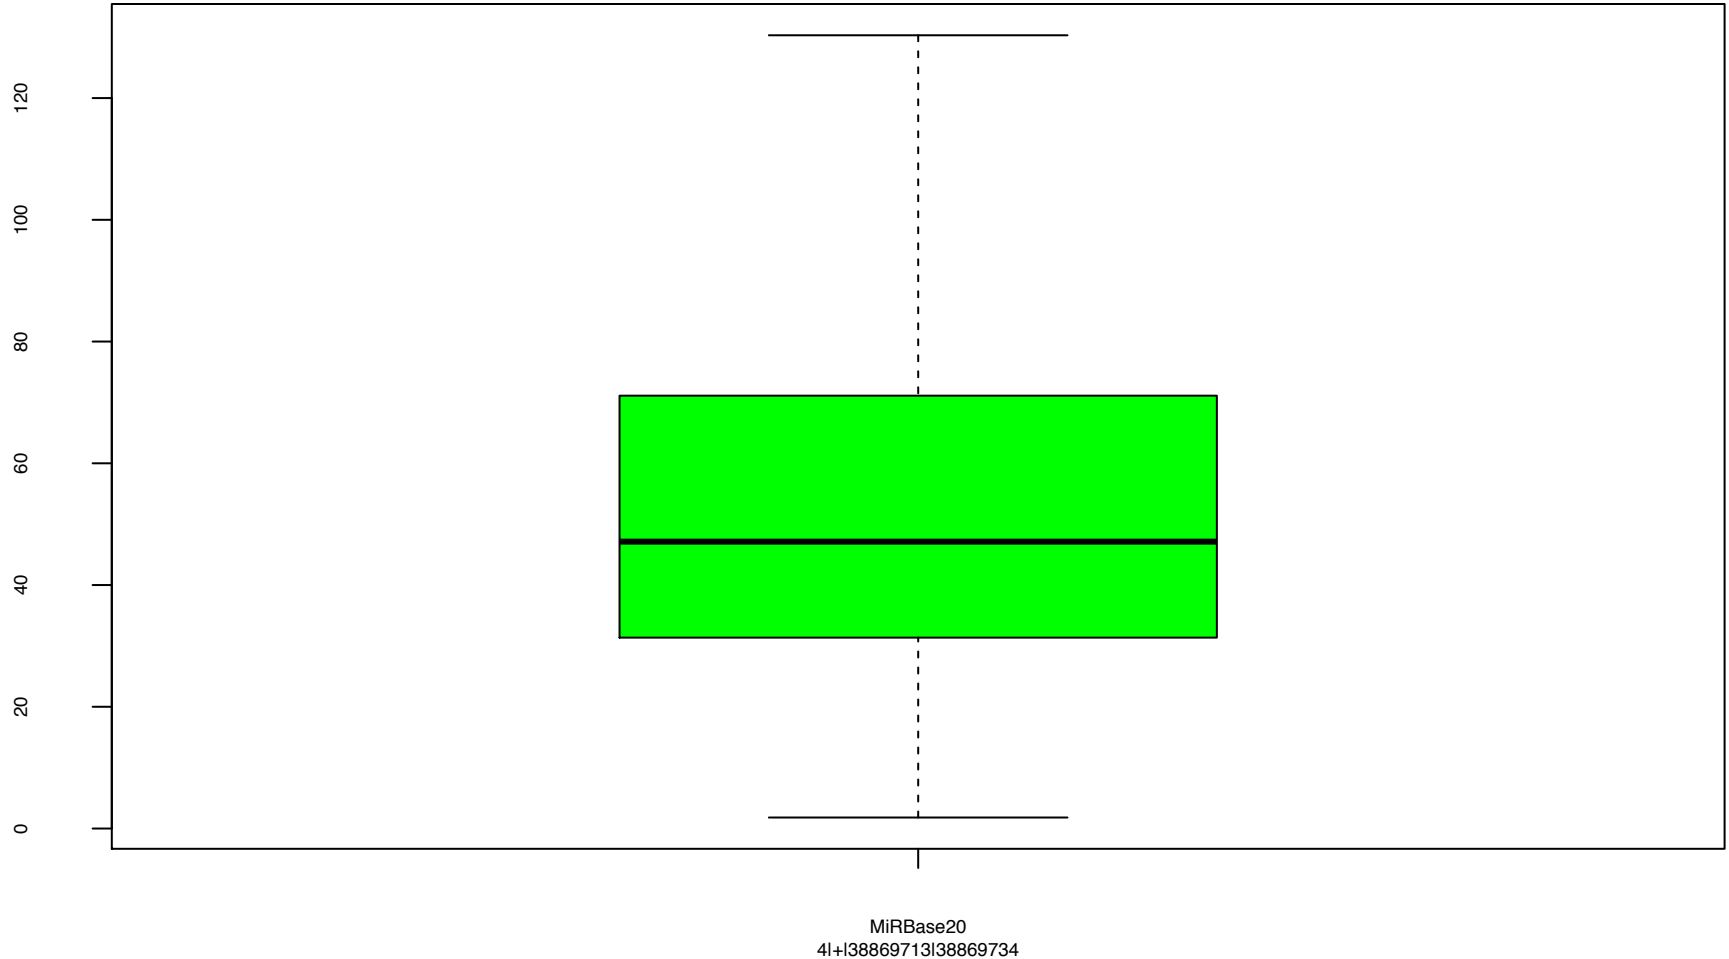

MiRBase20  
4l+l38869713l38869734

isomiRs

# MIMAT0000099\_1=hsa-miR-101-3p=MI0000739

Quantile Normalized Counts

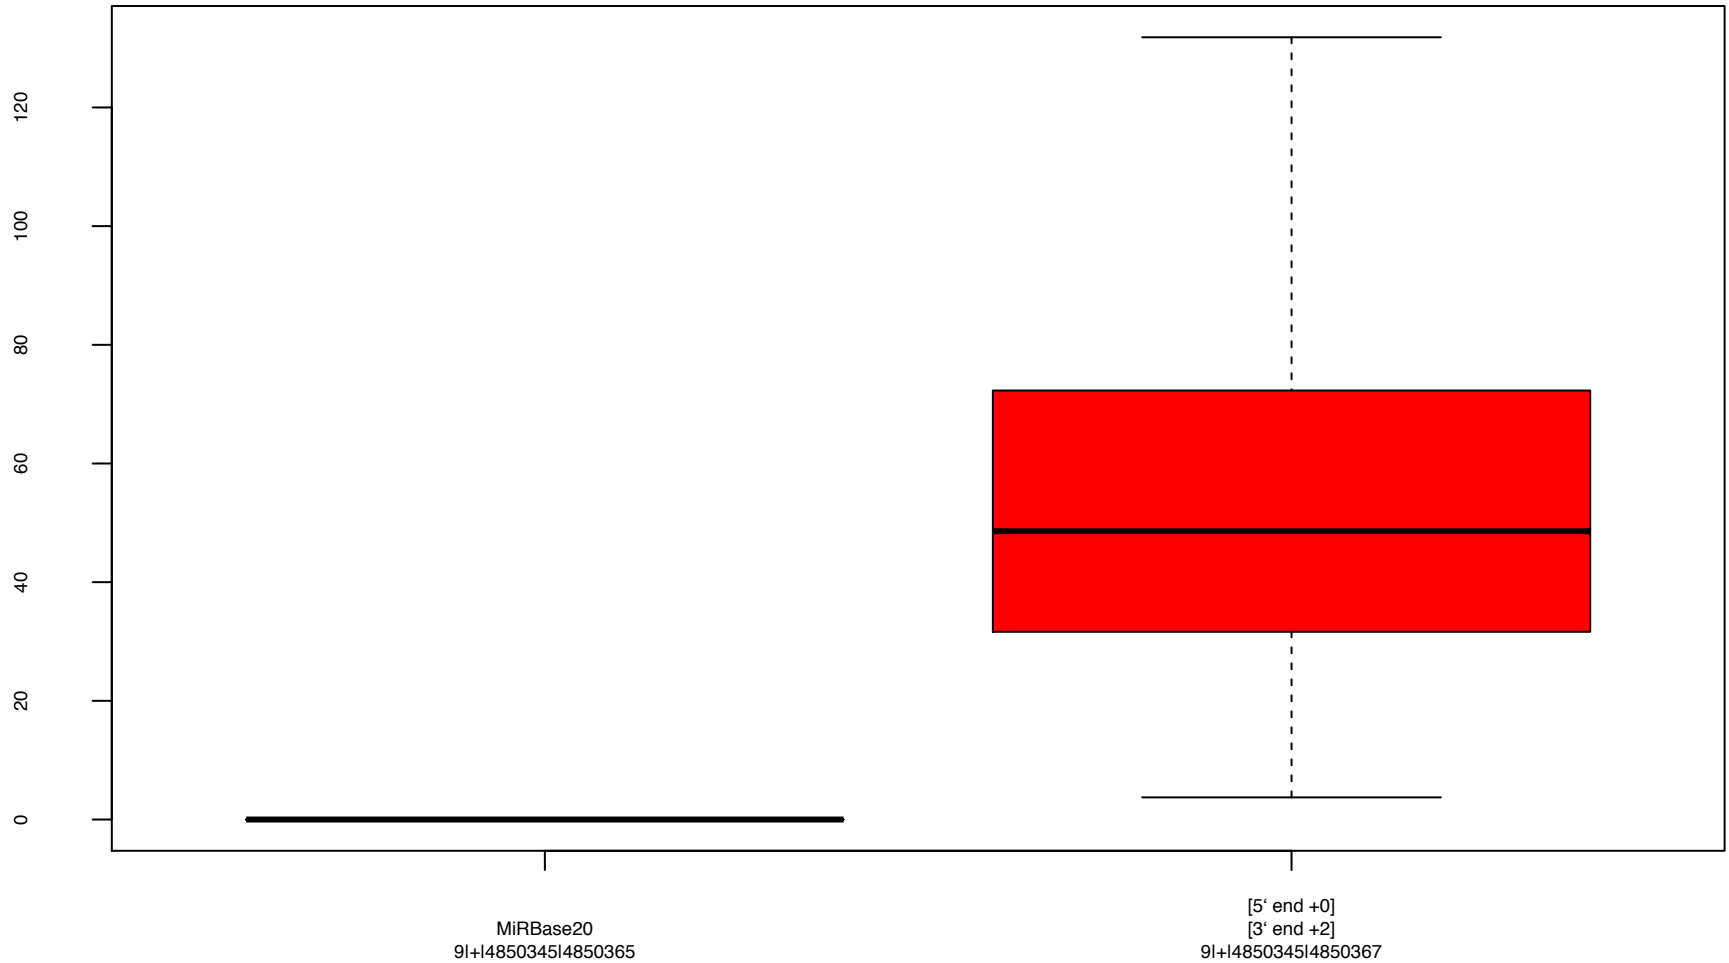

isomiRs

# MIMAT0004767=hsa-miR-193b-5p=MI0003137

Quantile Normalized Counts

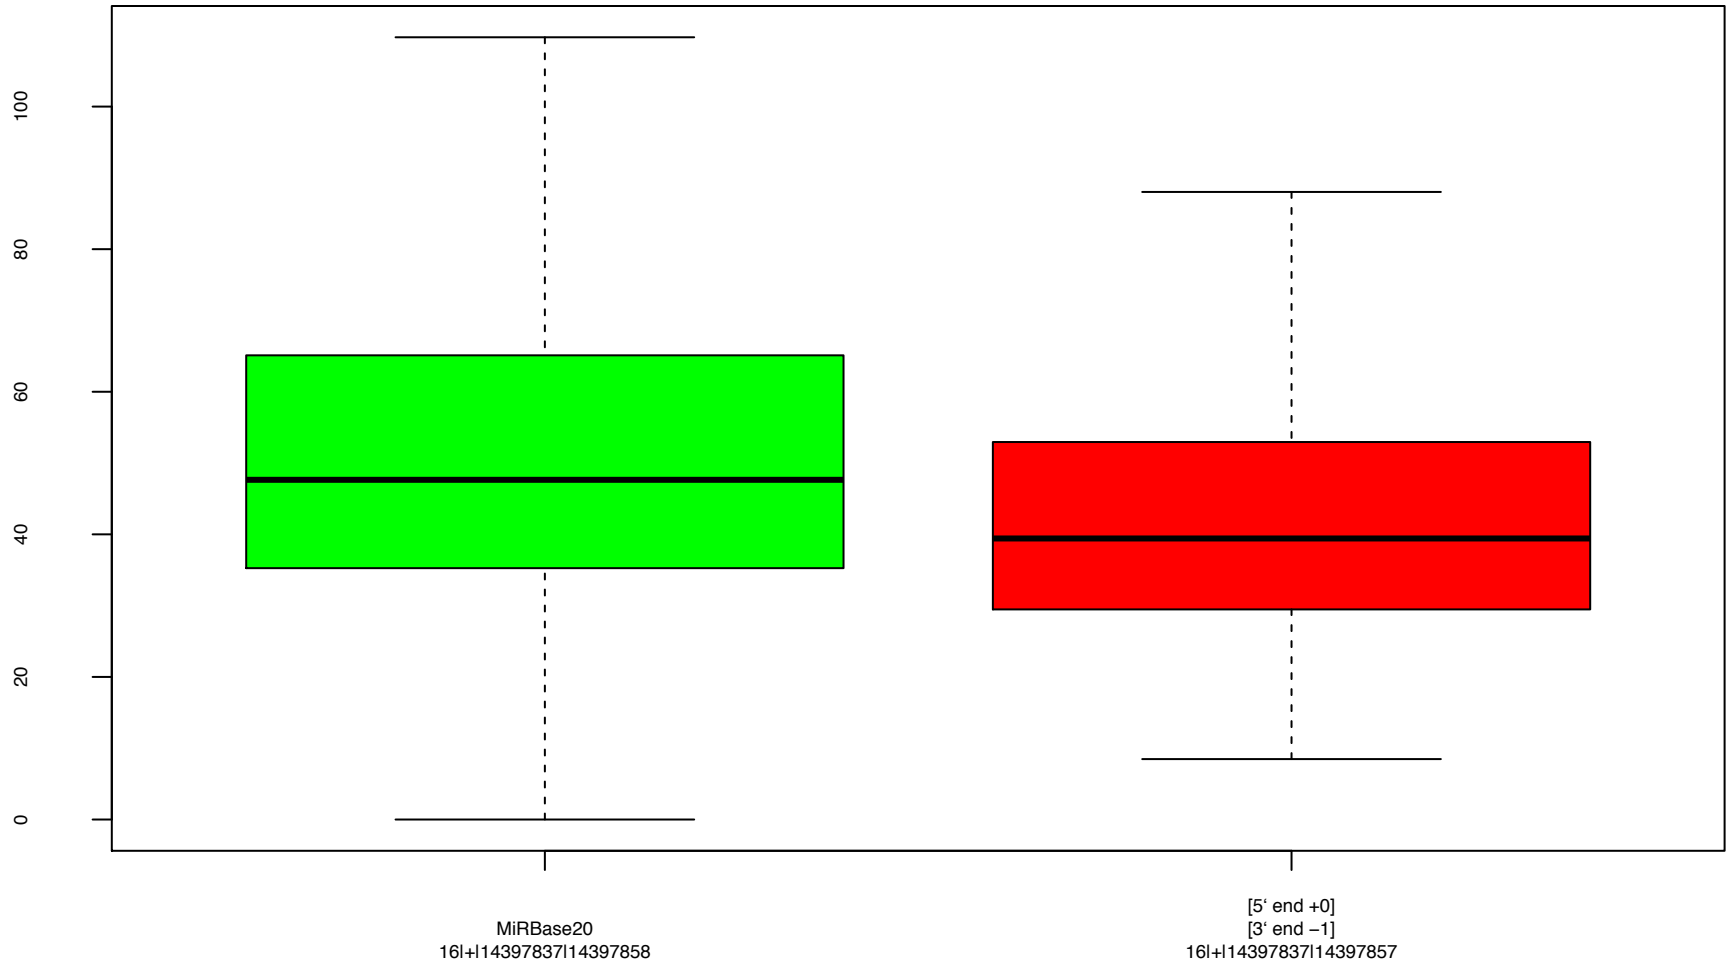

isomiRs



# MIMAT0004985=hsa-miR-942-5p=MI0005767

Quantile Normalized Counts

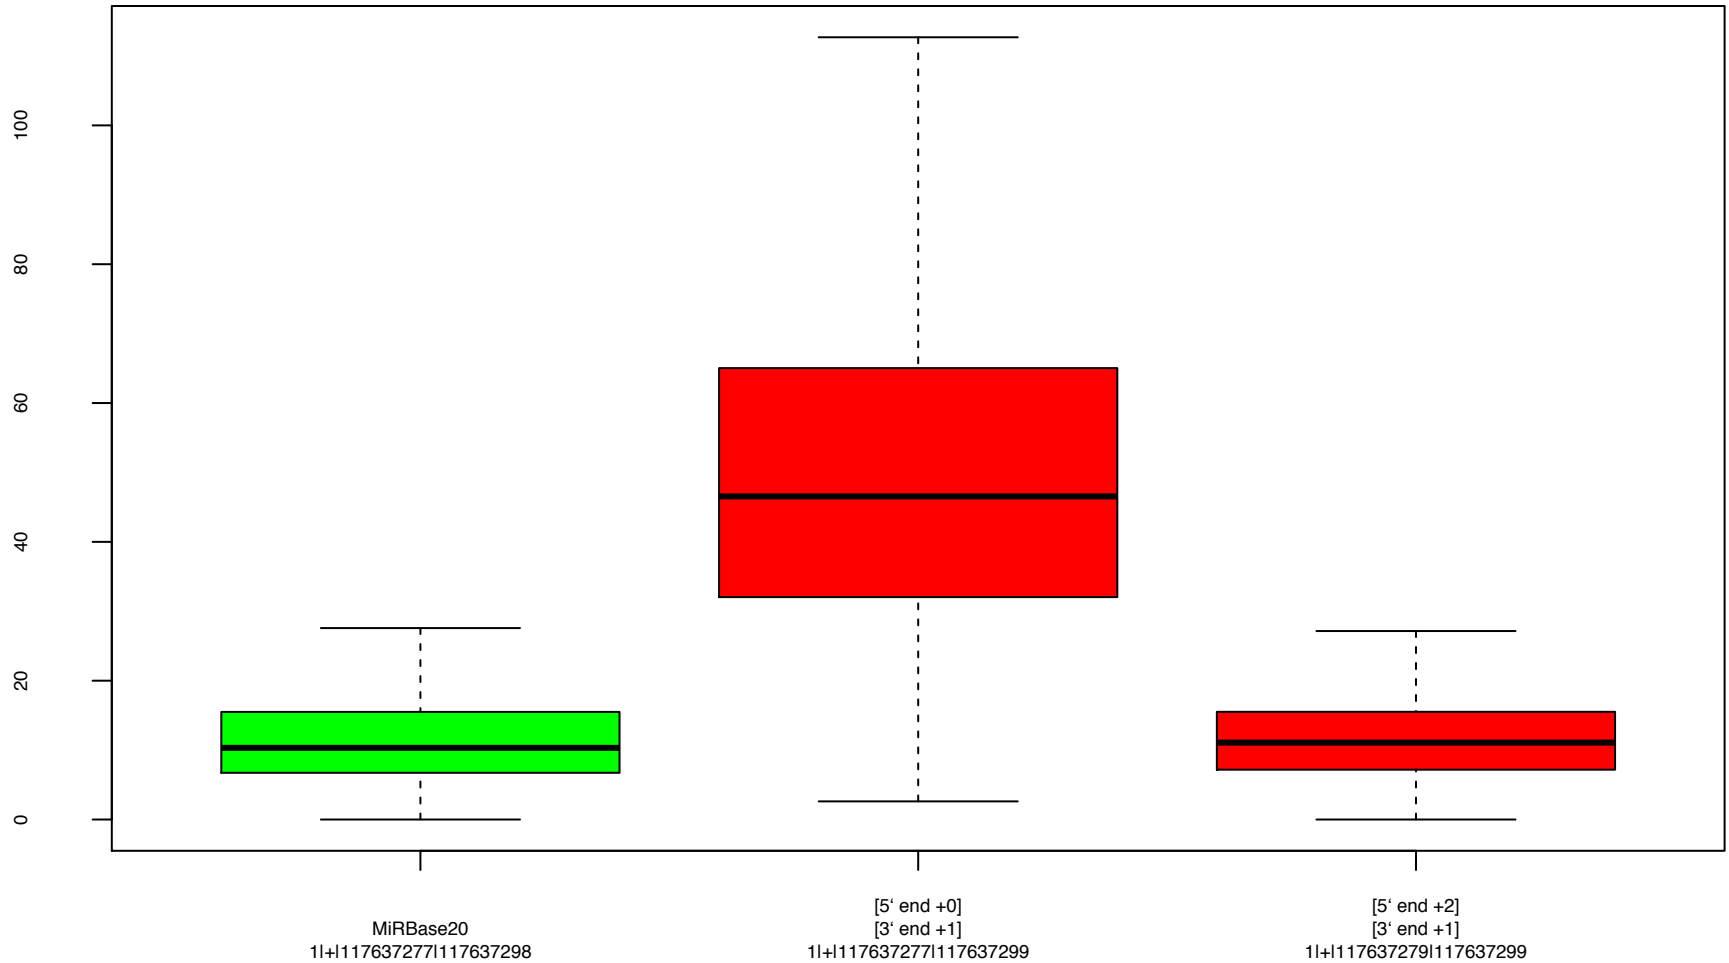

isomiRs

# MIMAT0004955=hsa-miR-374b-5p=MI0005566

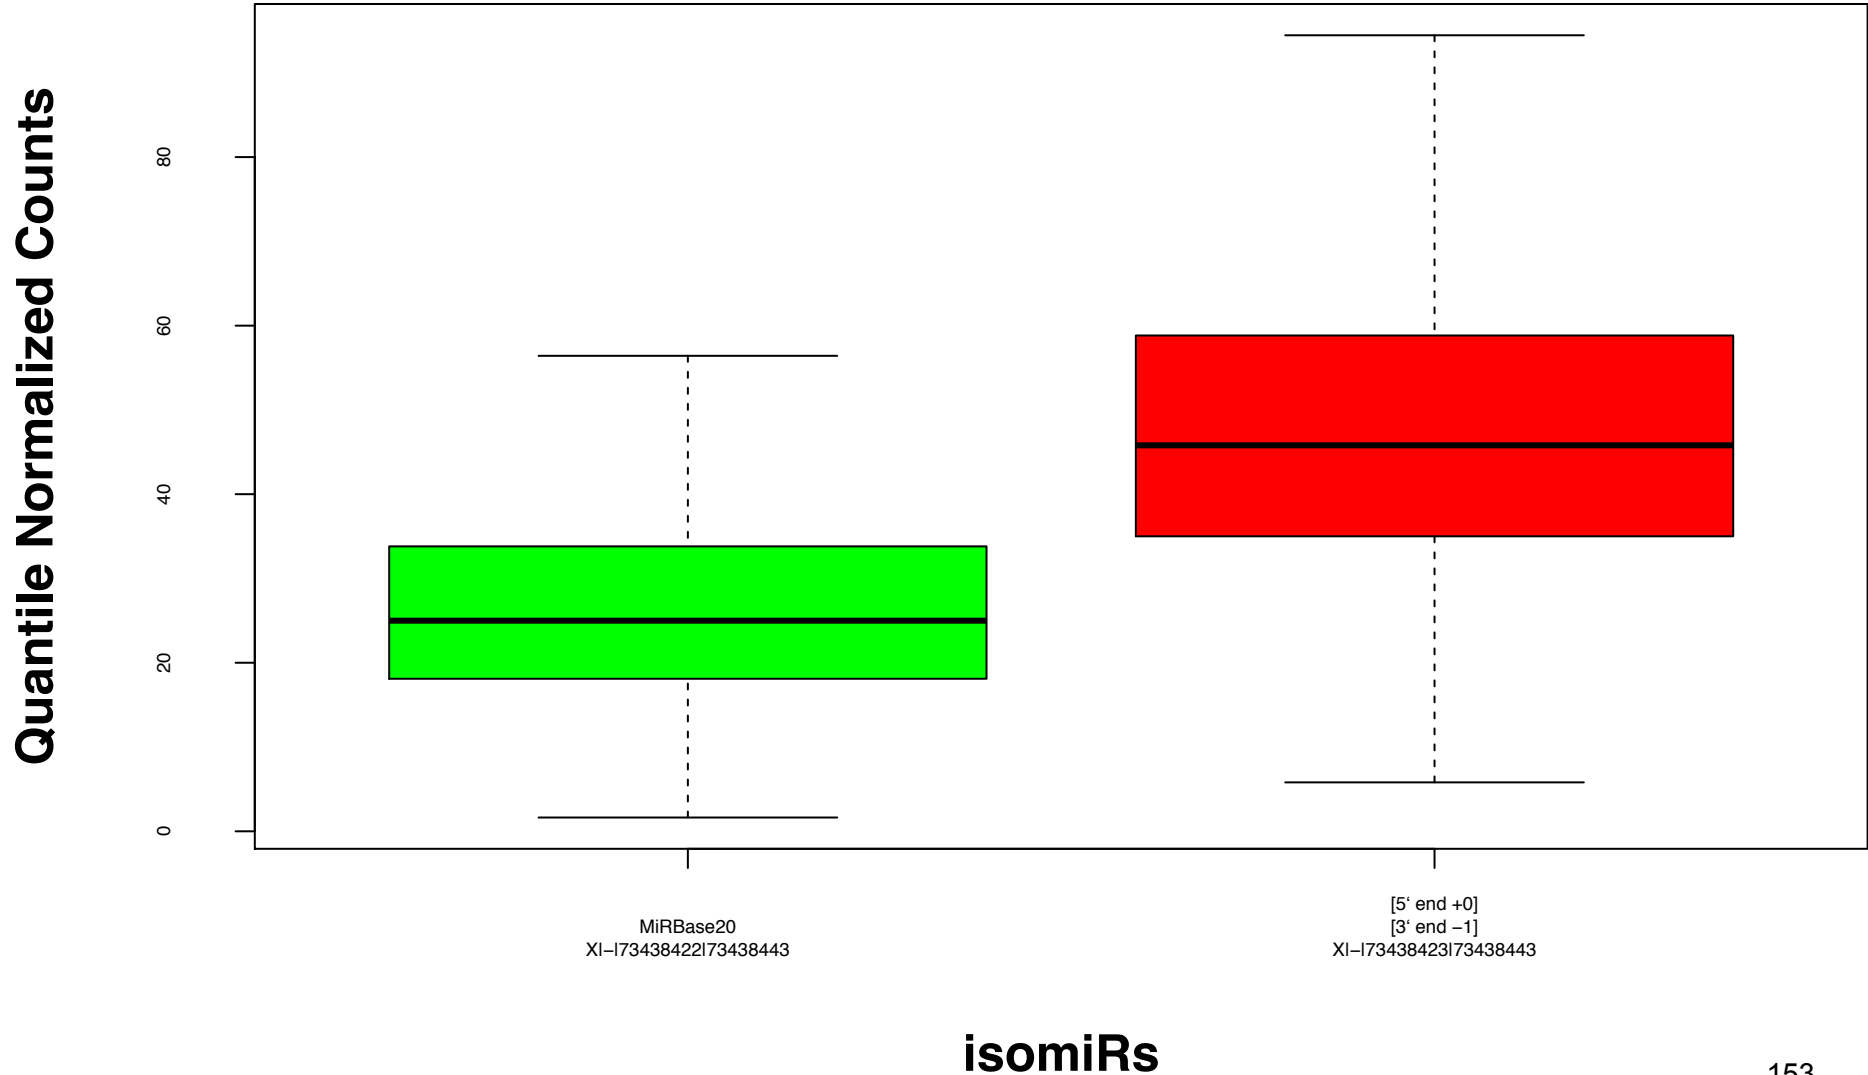

# MIMAT0000424=hsa-miR-128-3p=MI0000447

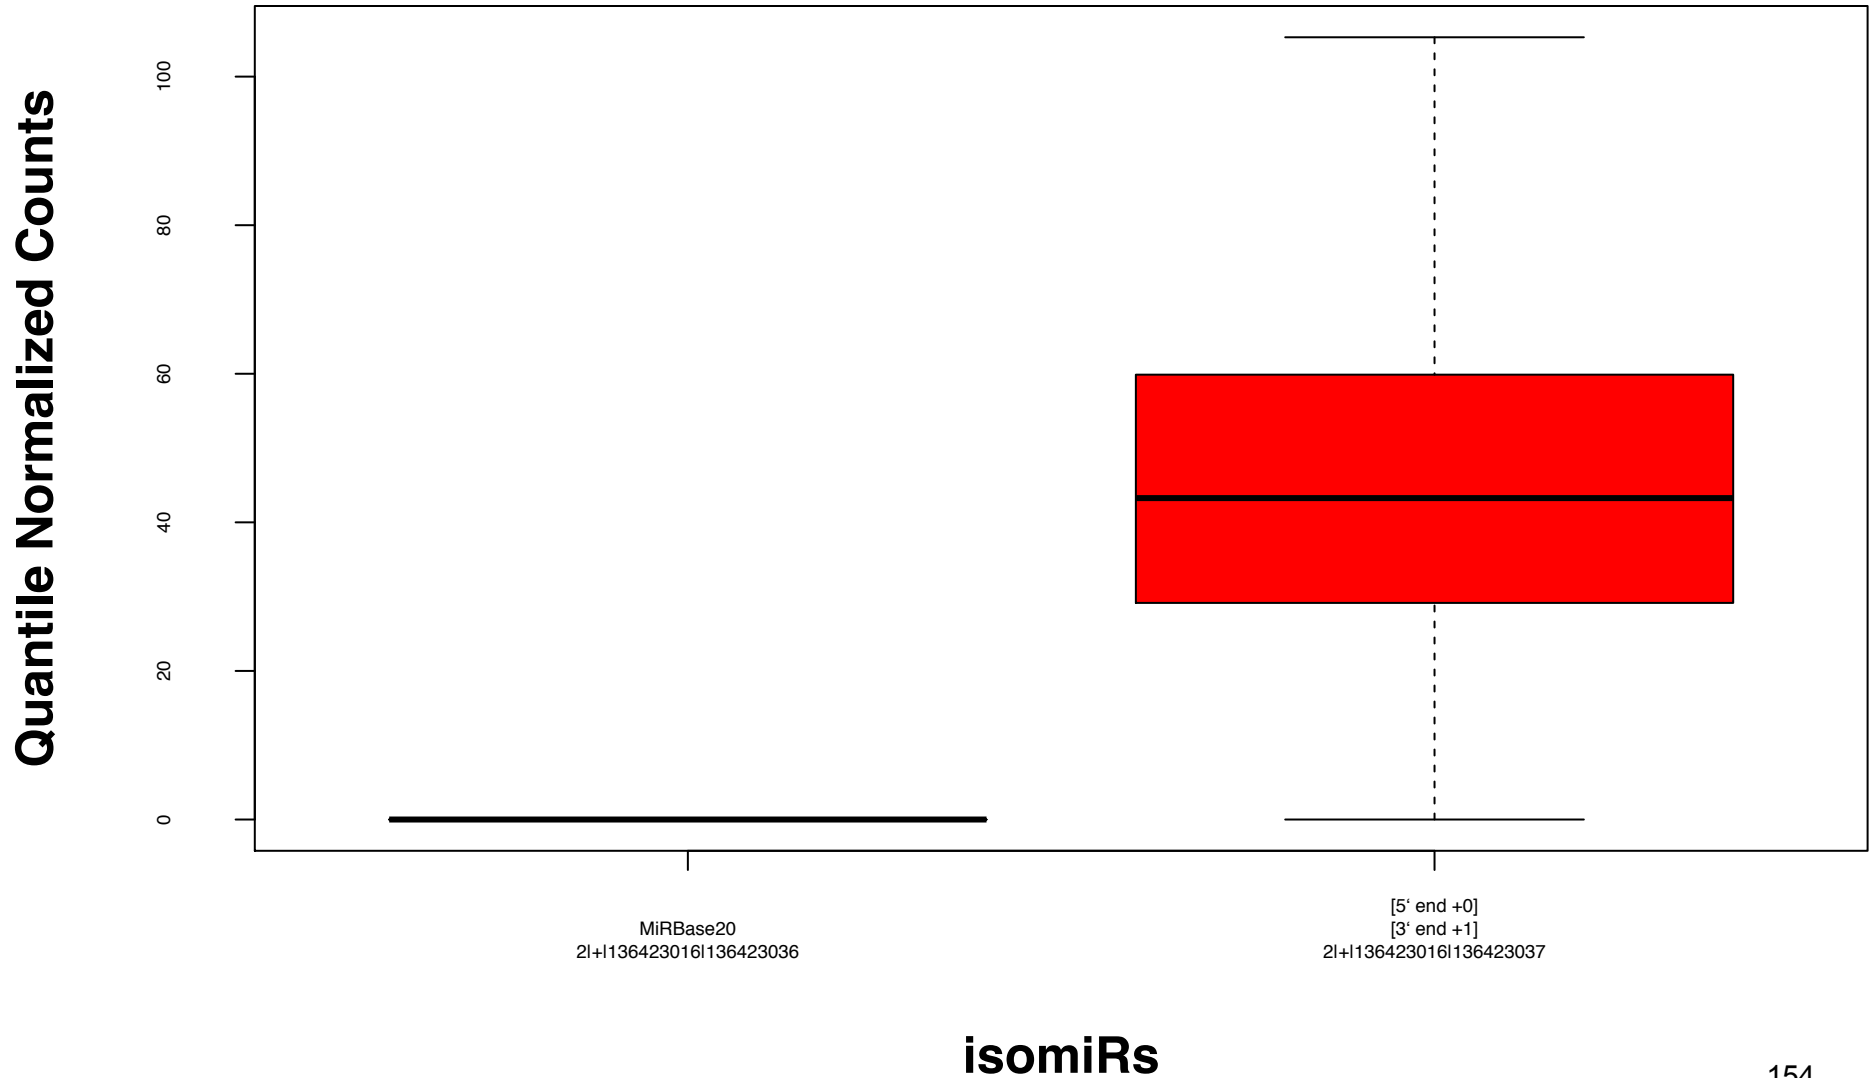

# MIMAT0006789=hsa-miR-1468-5p=MI0003782

Quantile Normalized Counts

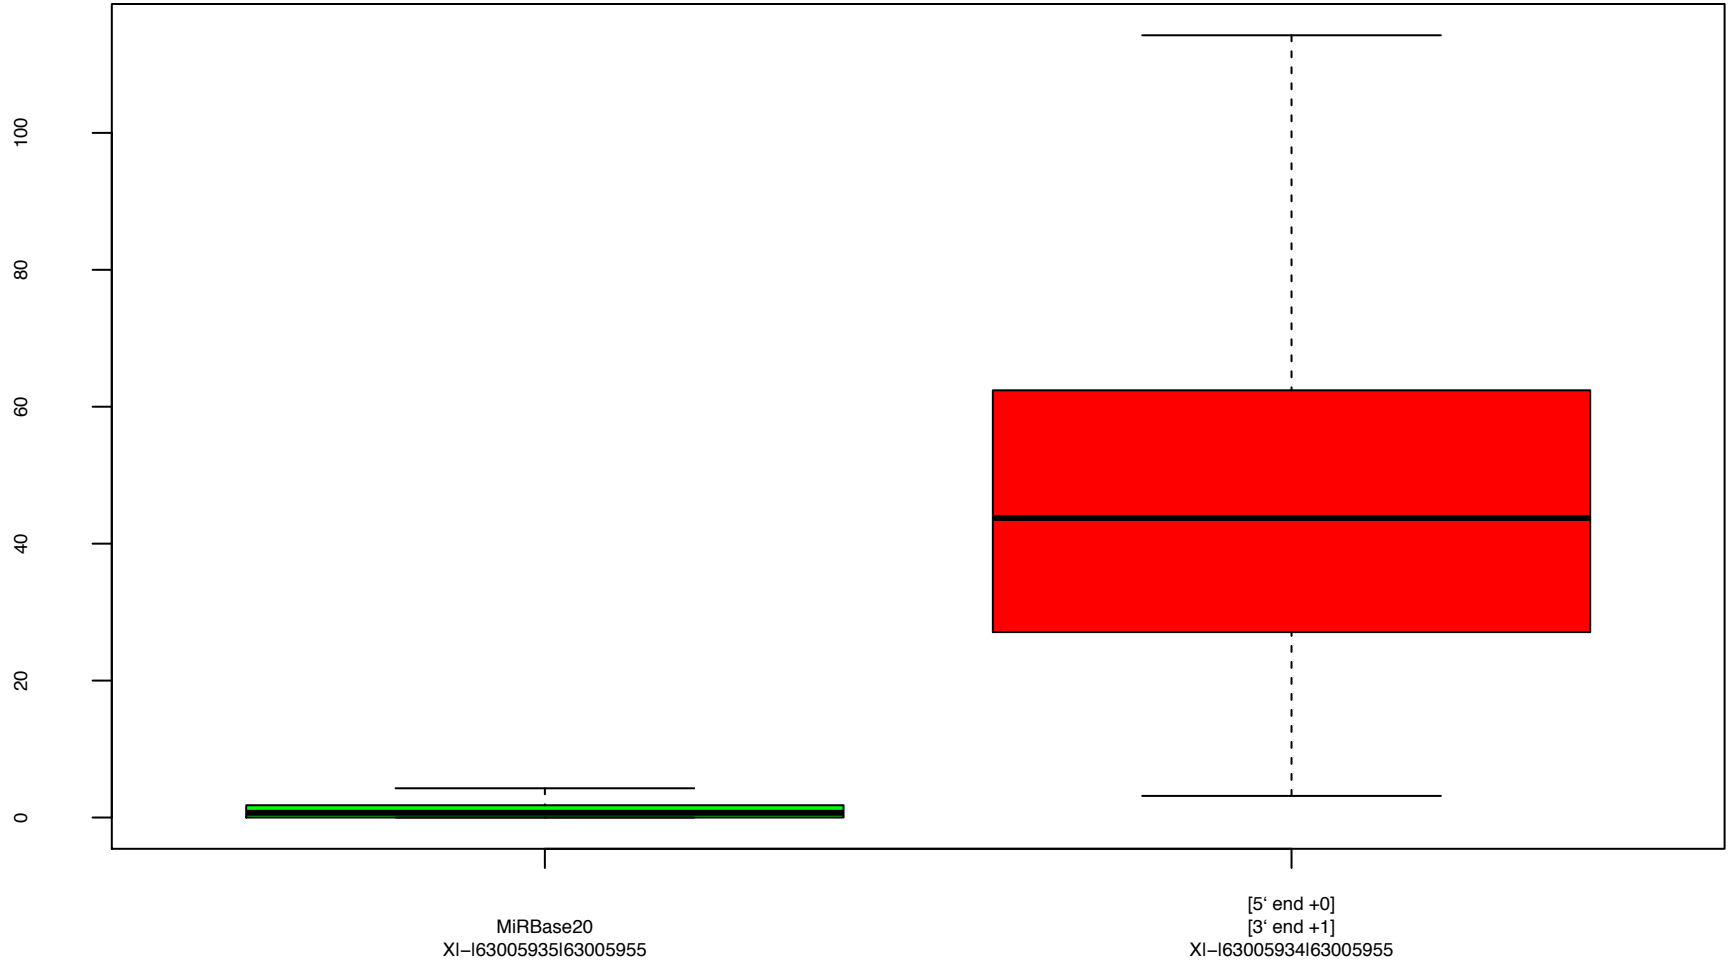

isomiRs

# MIMAT0000062\_2=hsa-let-7a-5p=MI0000060

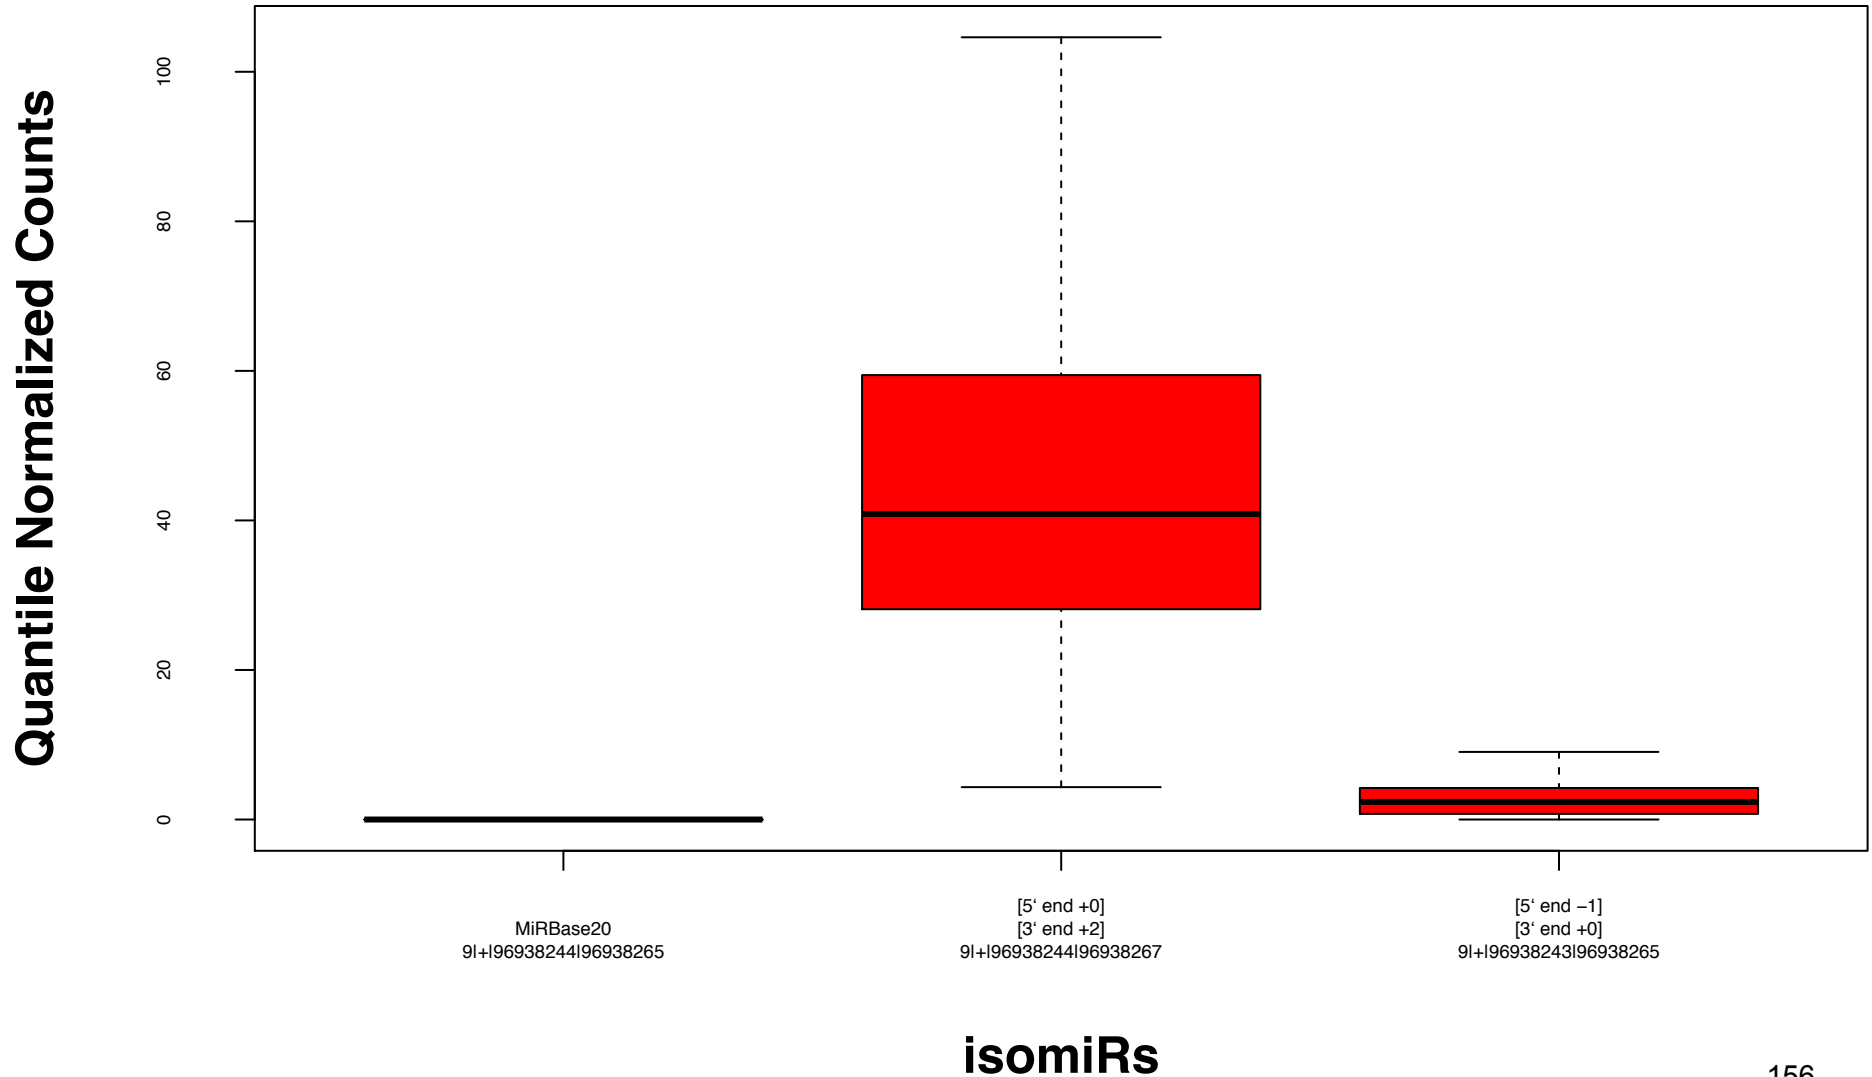

# MIMAT0004487=hsa-let-7f-2-3p=MI0000068

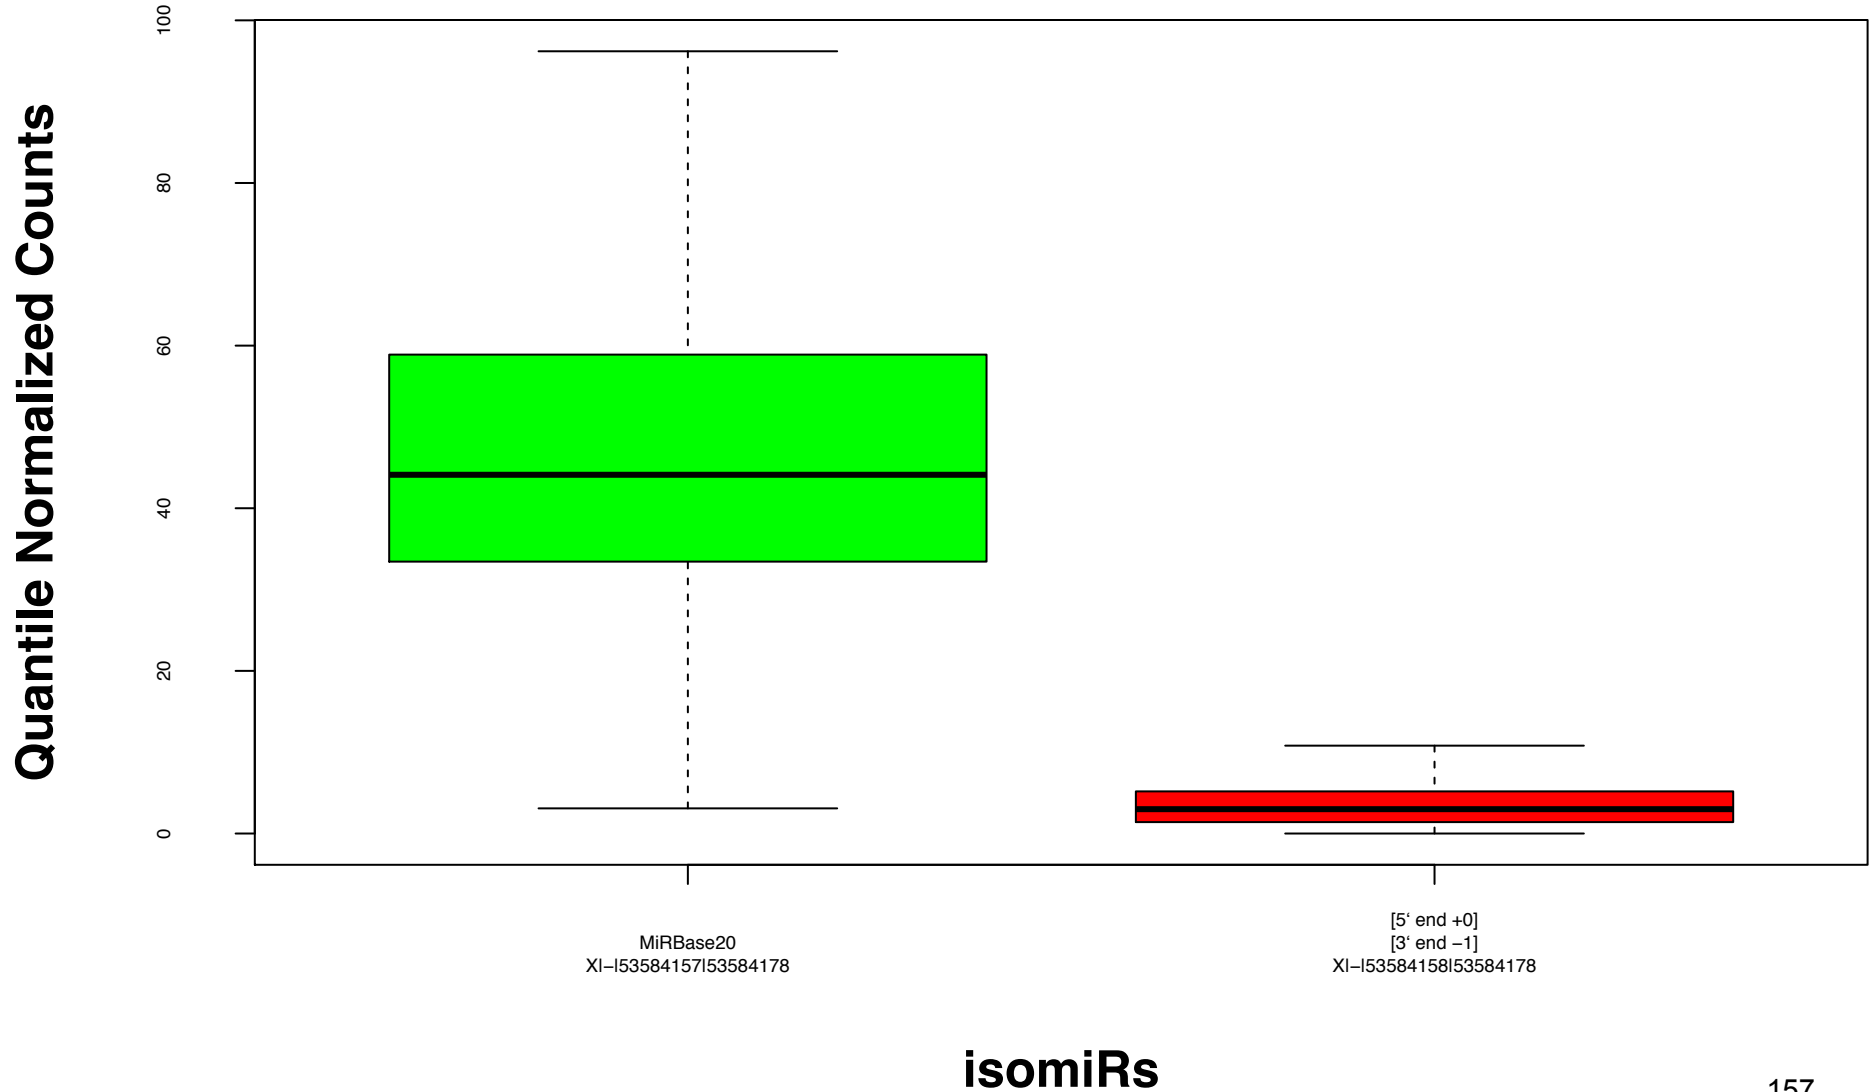

# MIMAT0000438=hsa-miR-152-3p=MI0000462

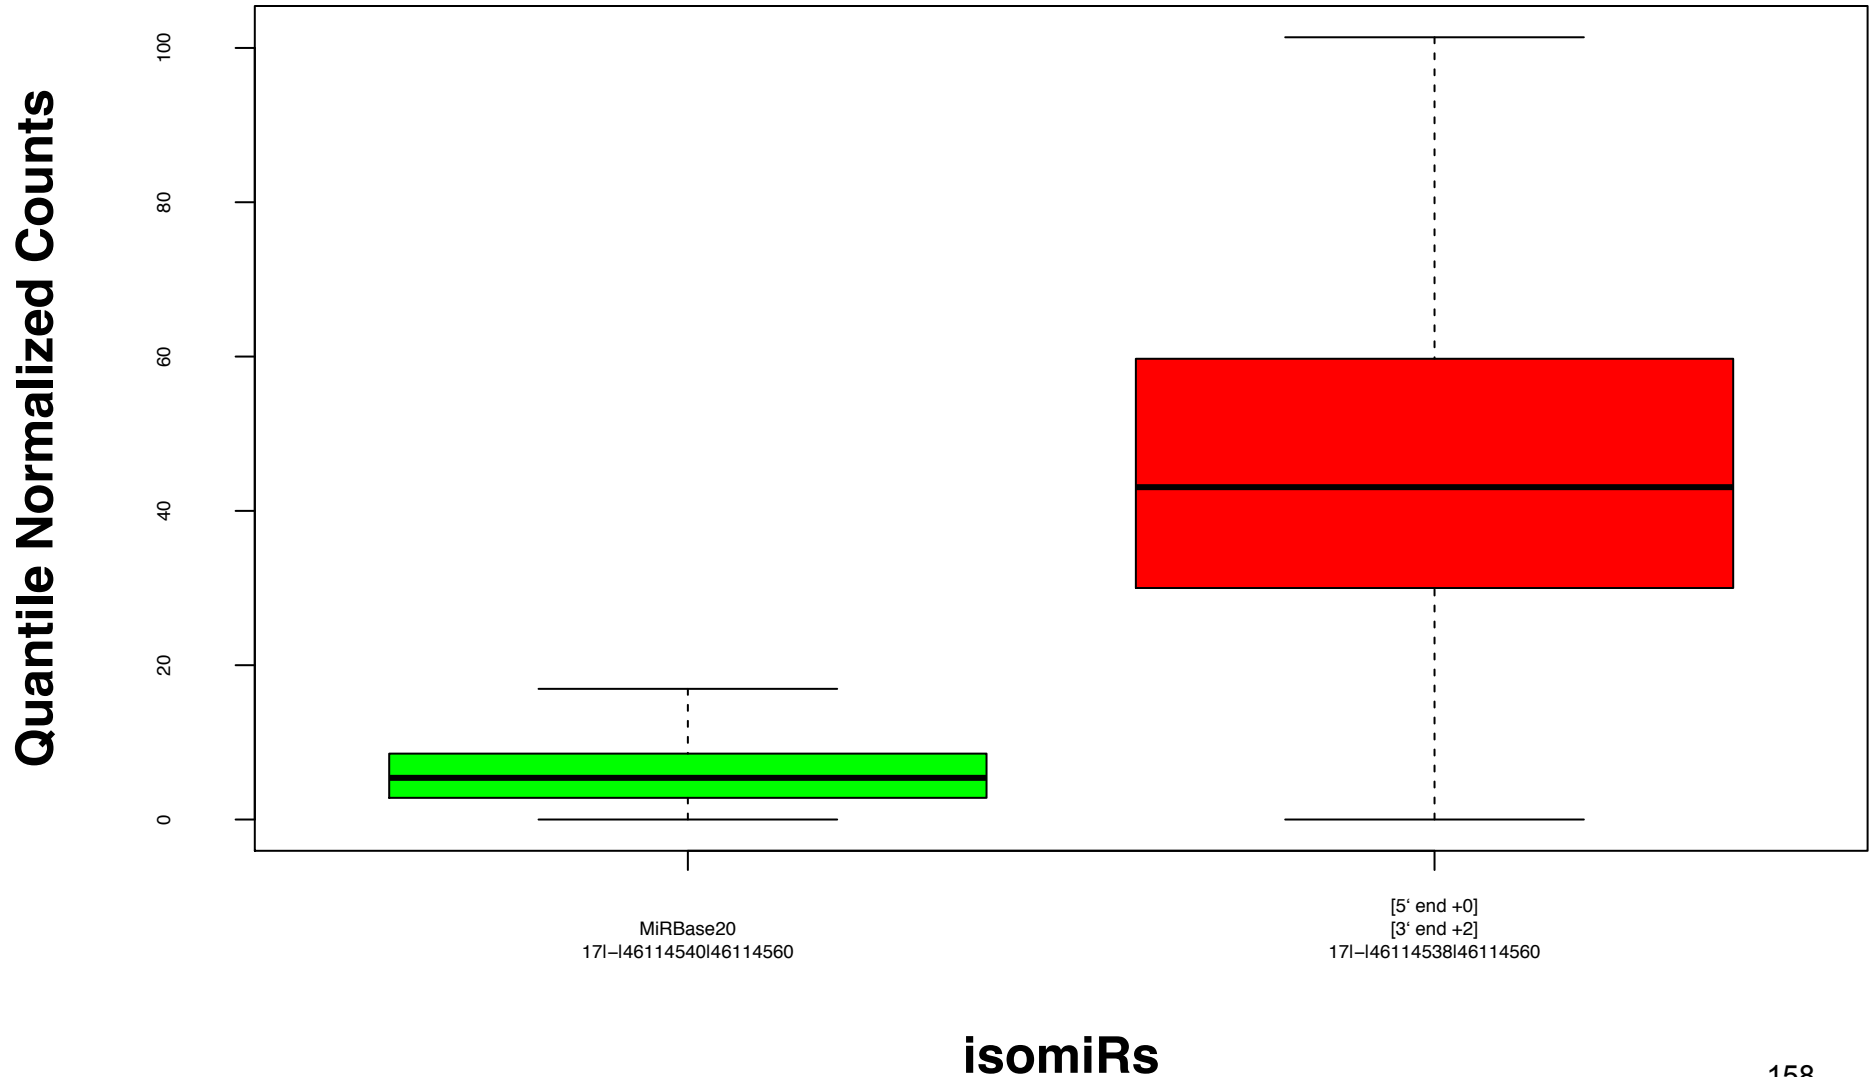

# MIMAT0000069=hsa-miR-16-5p=MI0000070

Quantile Normalized Counts

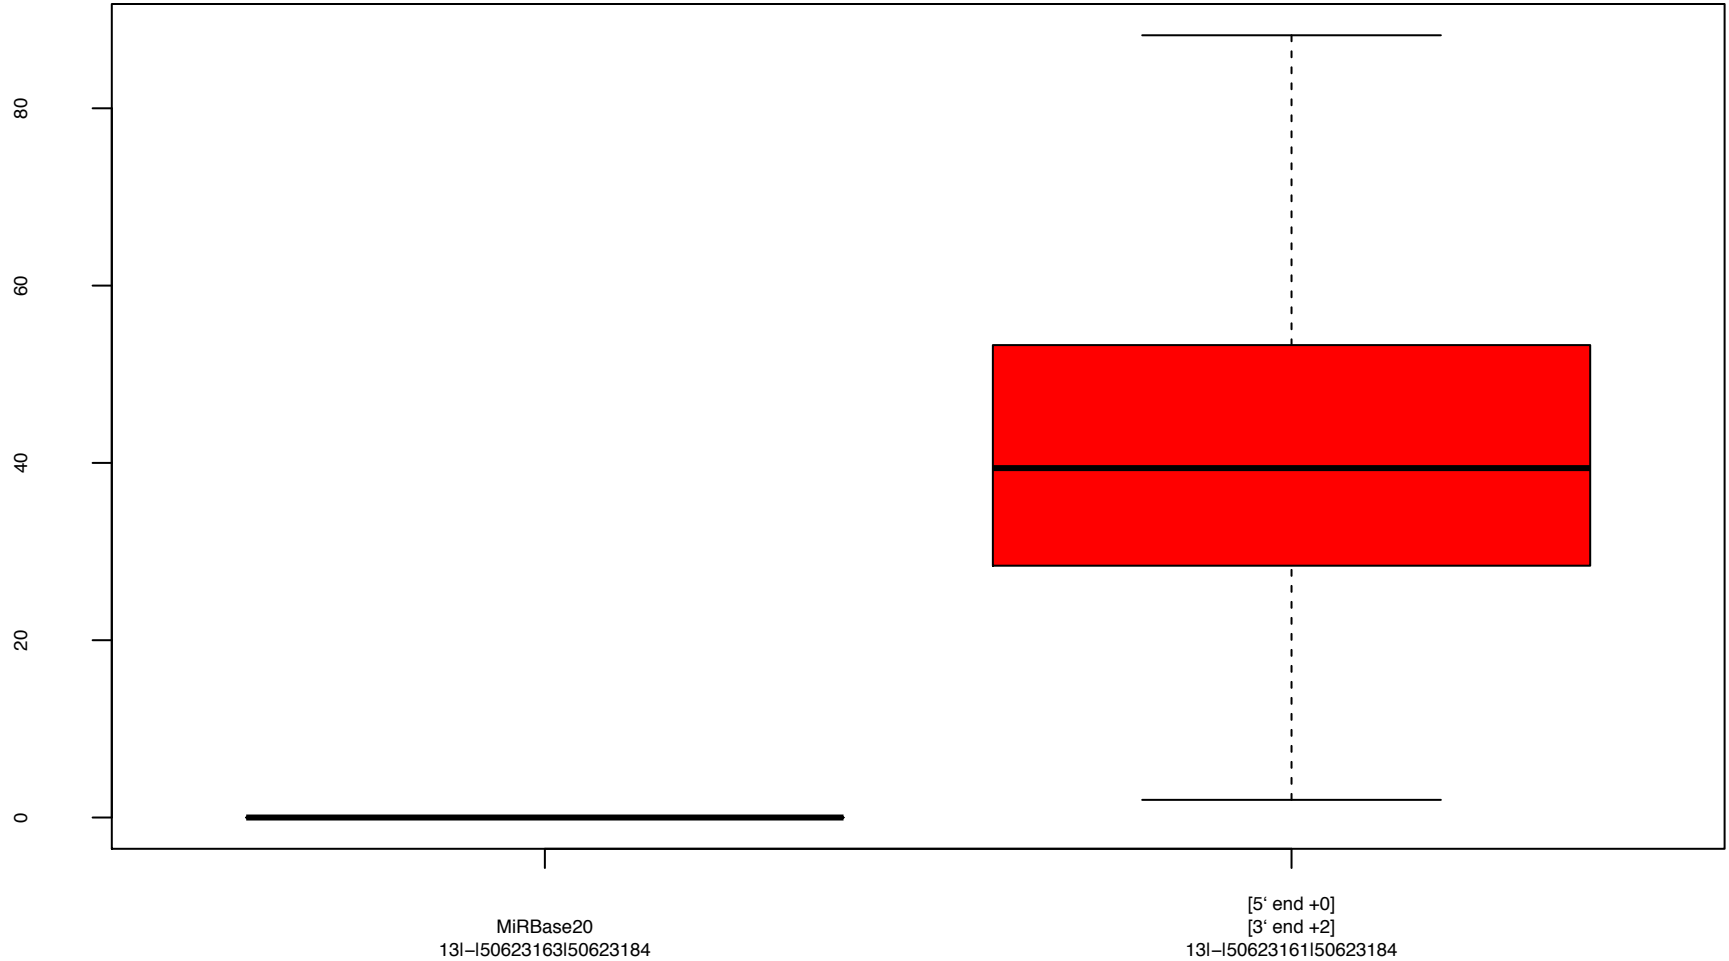

isomiRs



# MIMAT0000727=hsa-miR-374a-5p=MI0000782

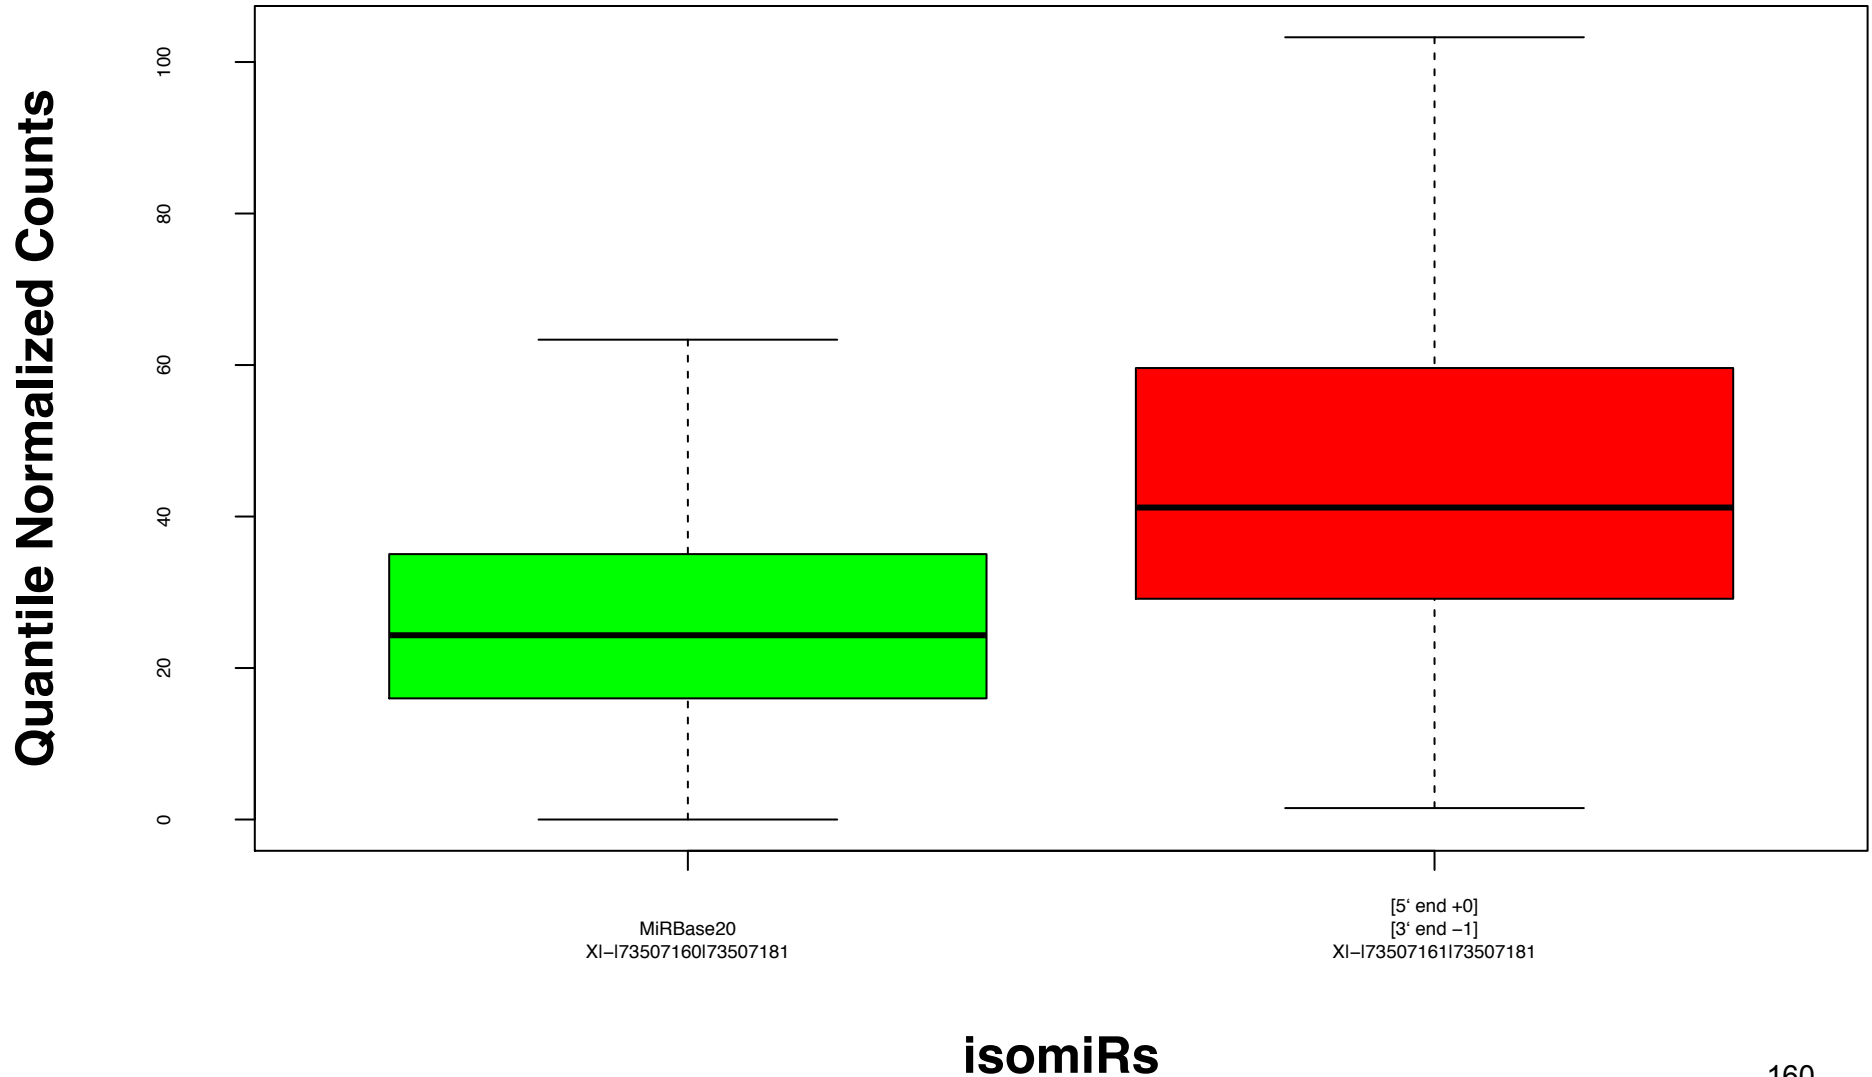

# MIMAT0019761=hsa-miR-4677-3p=MI0017308

Quantile Normalized Counts

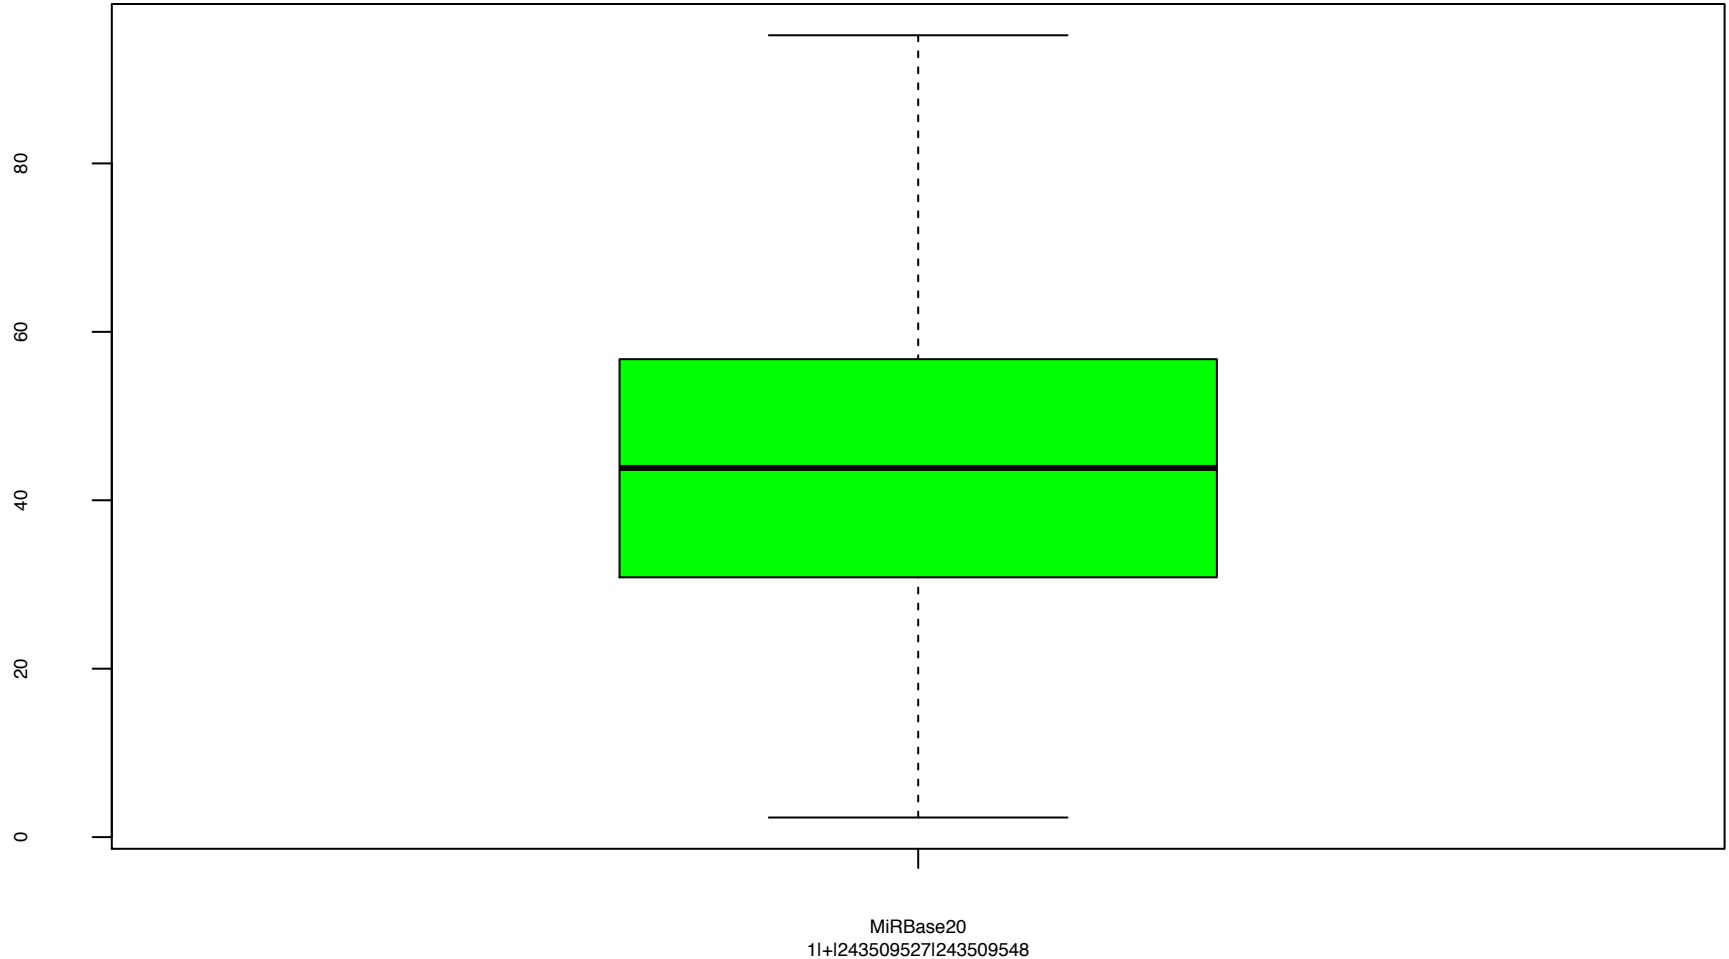

isomiRs

# MIMAT0000090=hsa-miR-32-5p=MI0000090

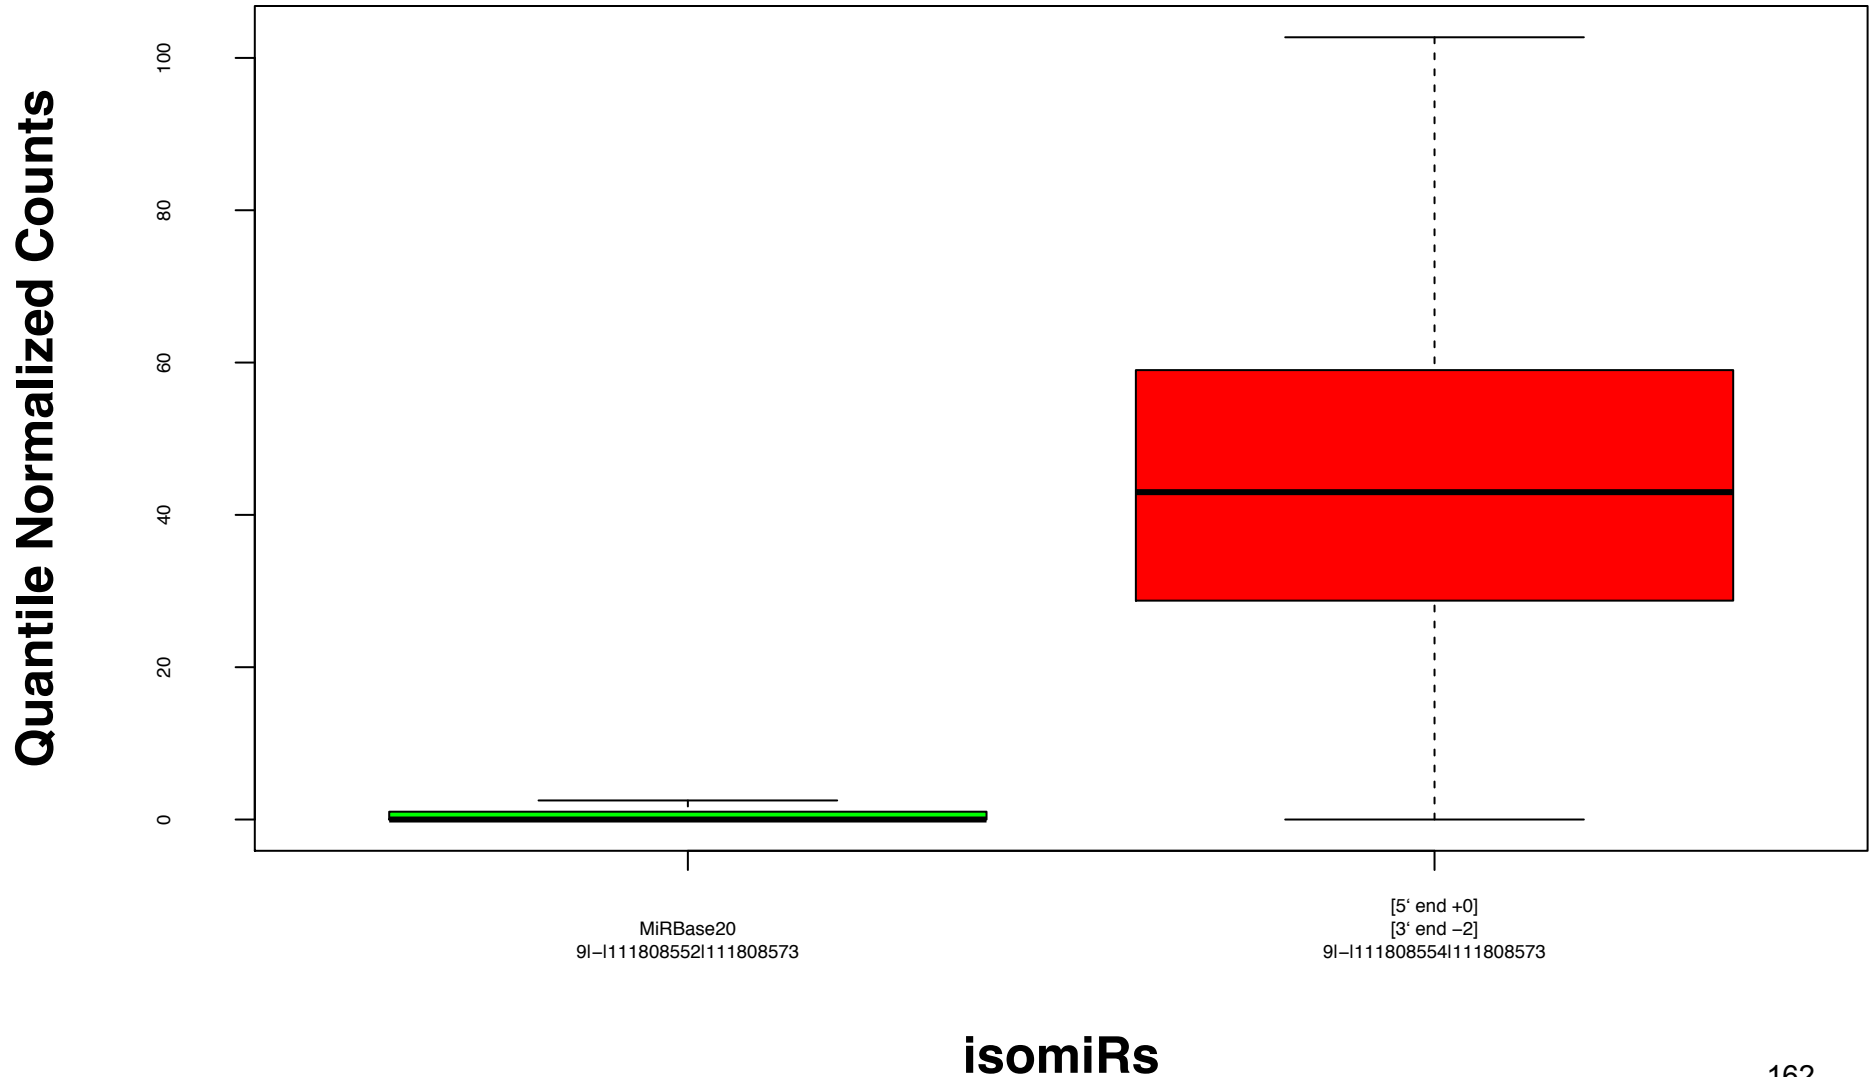

# MIMAT0000731=hsa-miR-378a-5p=MI0000786

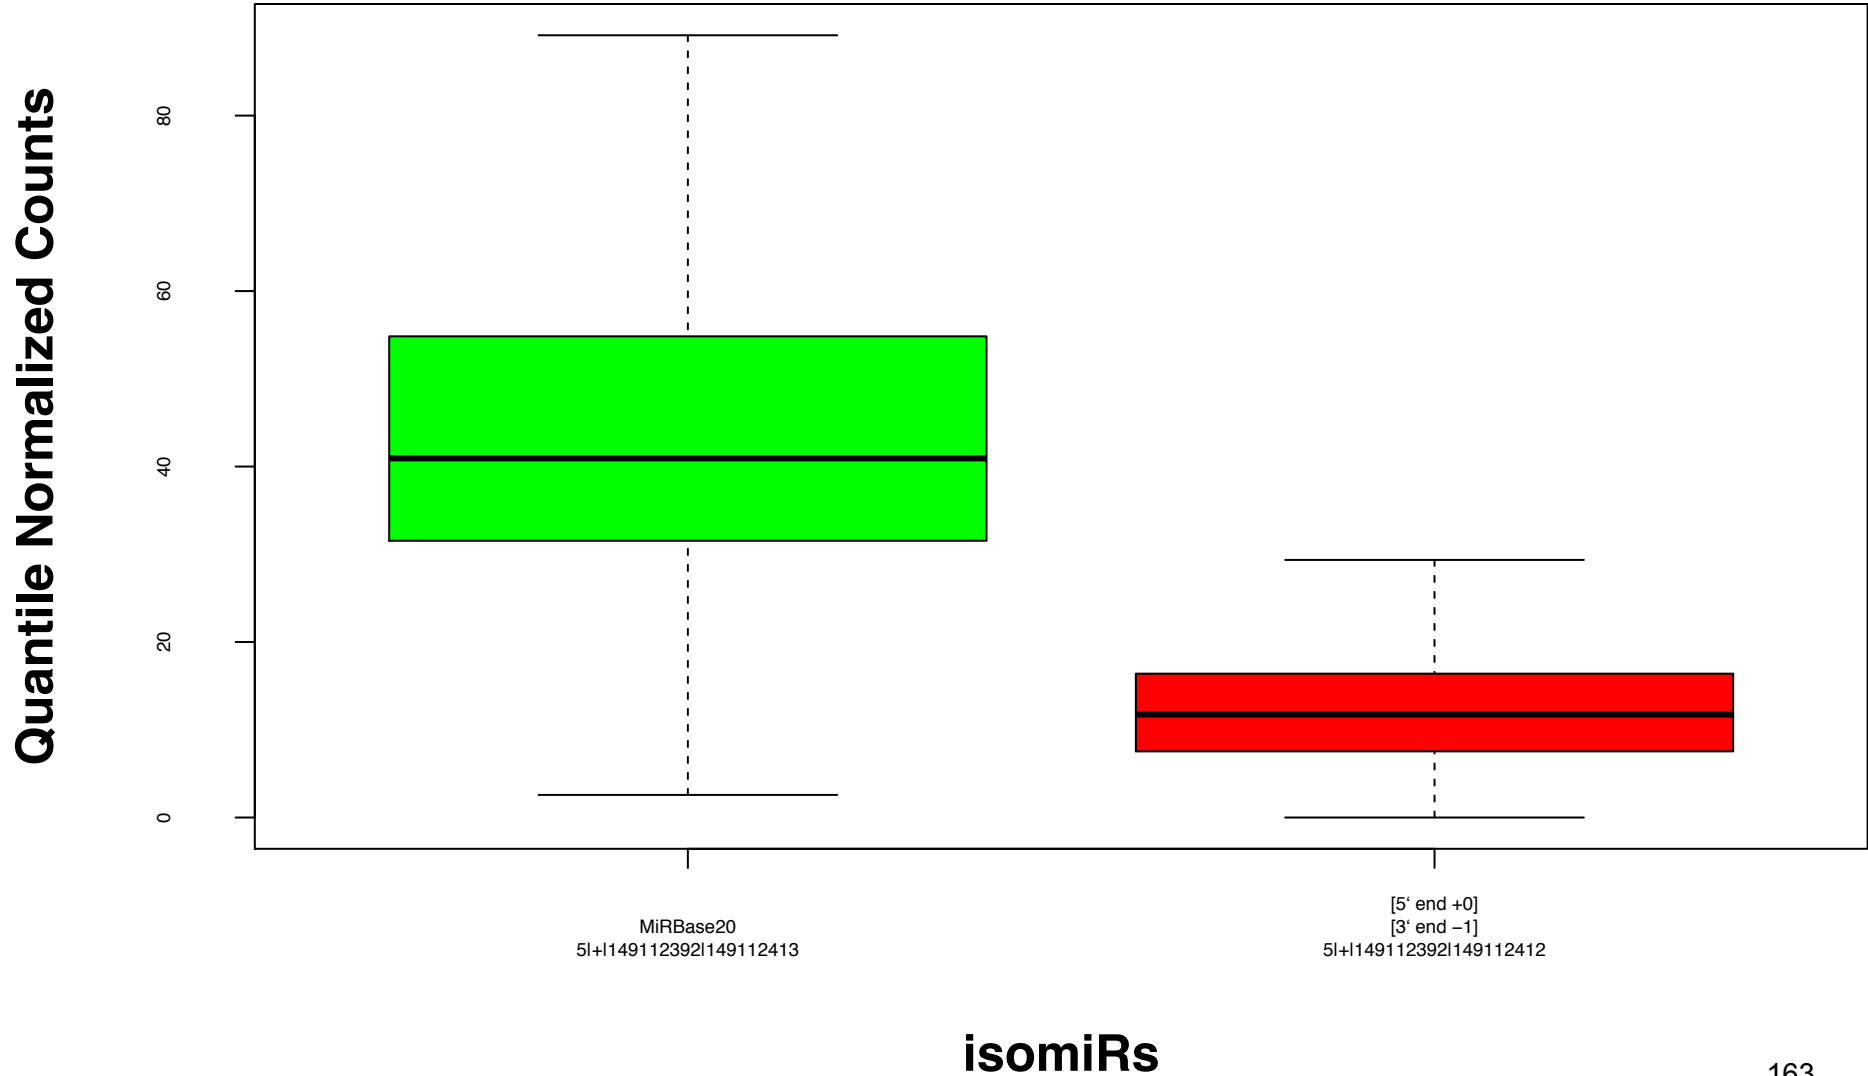

# MIMAT0000455=hsa-miR-185-5p=MI0000482

Quantile Normalized Counts

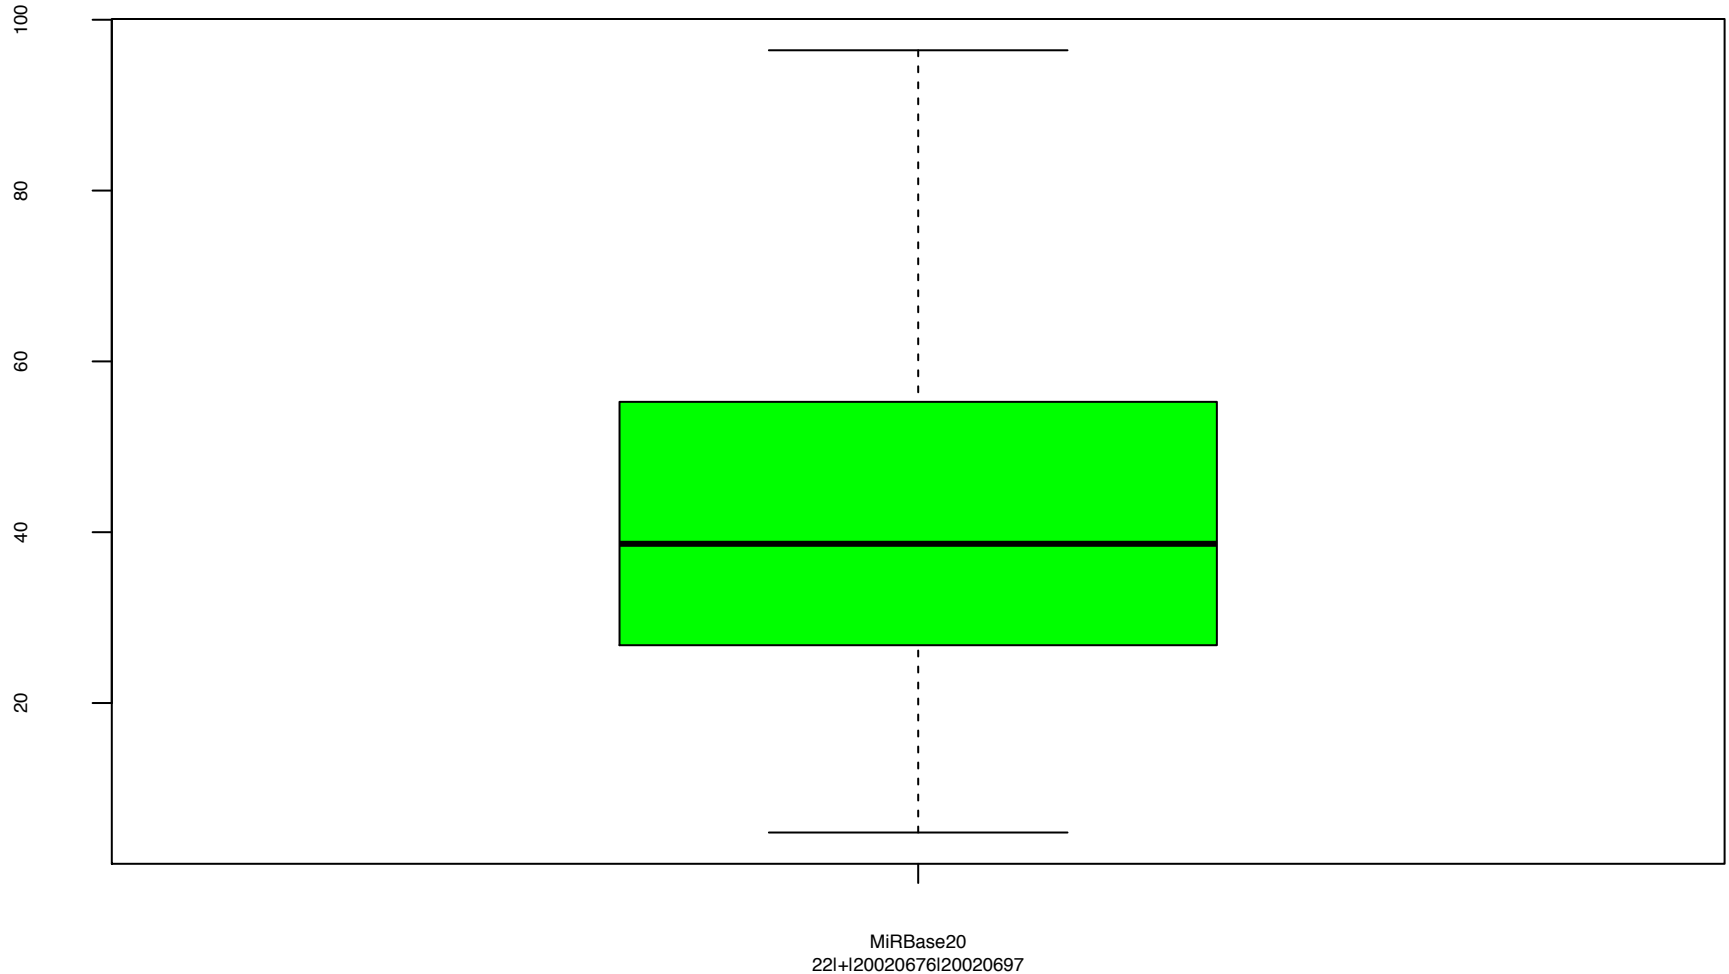

isomiRs

# MIMAT0004553=hsa-miR-7-1-3p=MI0000263

Quantile Normalized Counts

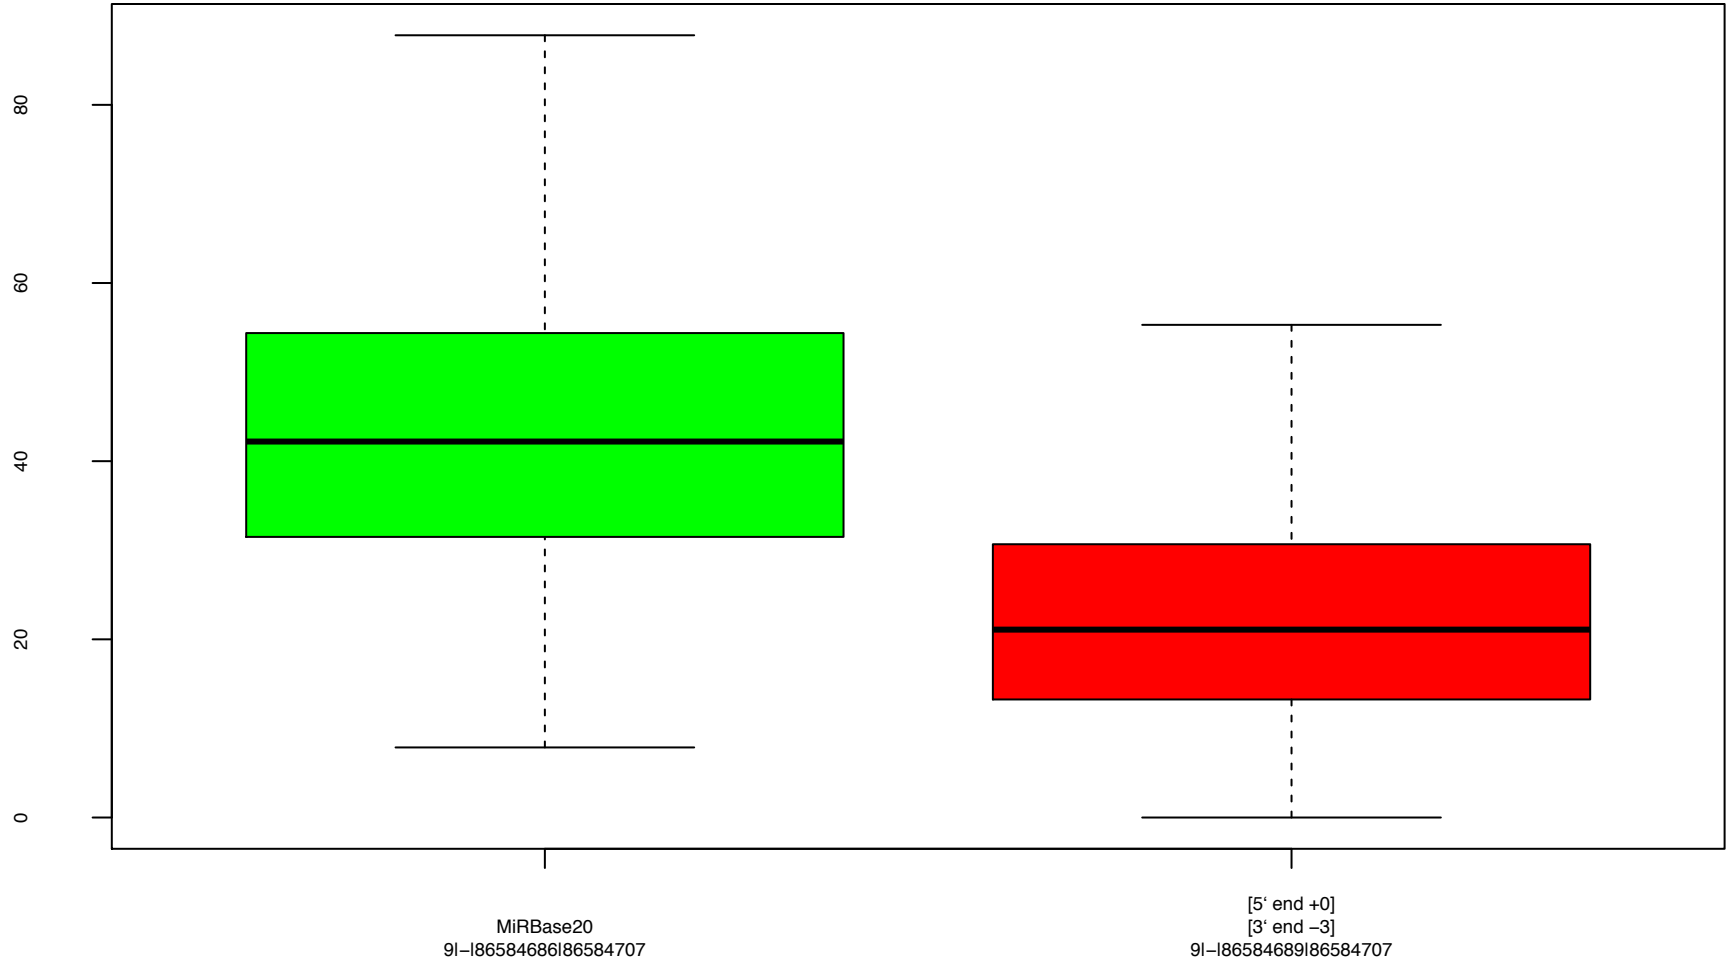

isomiRs

# MIMAT0004588=hsa-miR-27b-5p=MI0000440

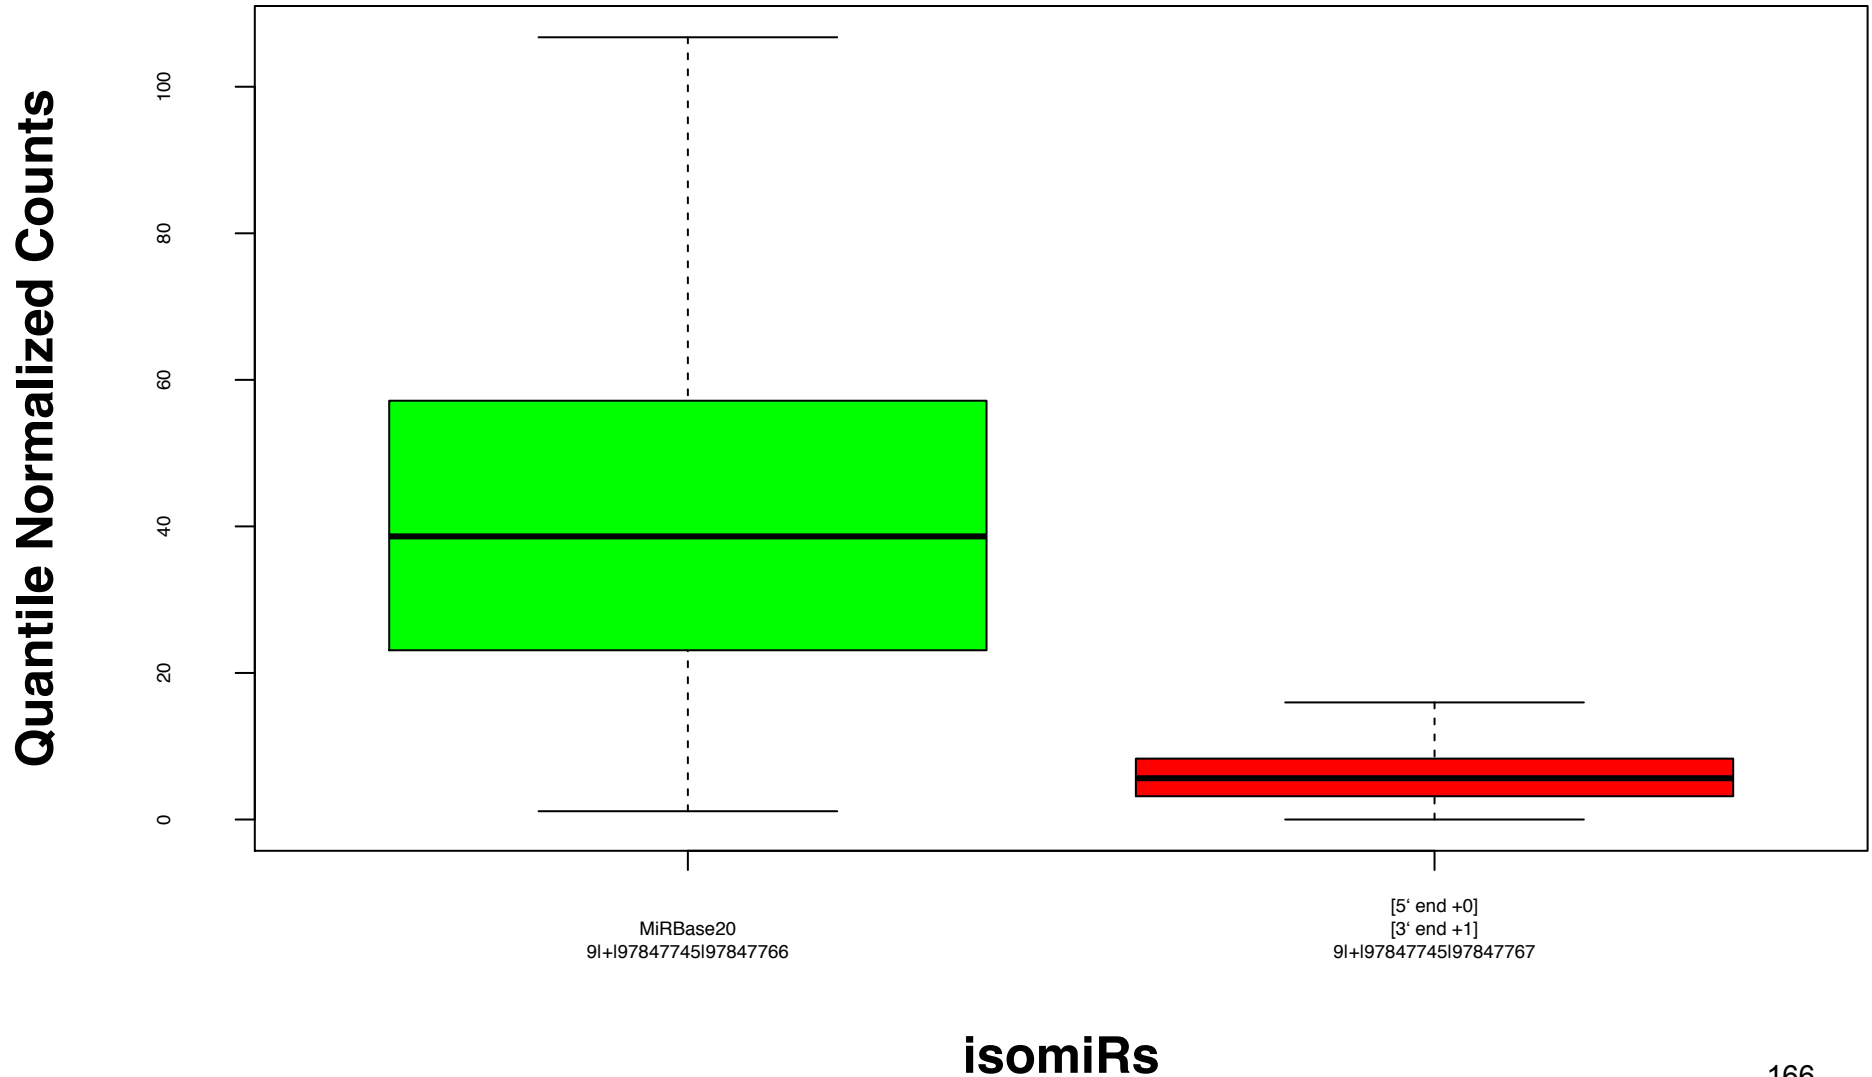

# MIMAT0030019=hsa-miR-7704=MI0025240

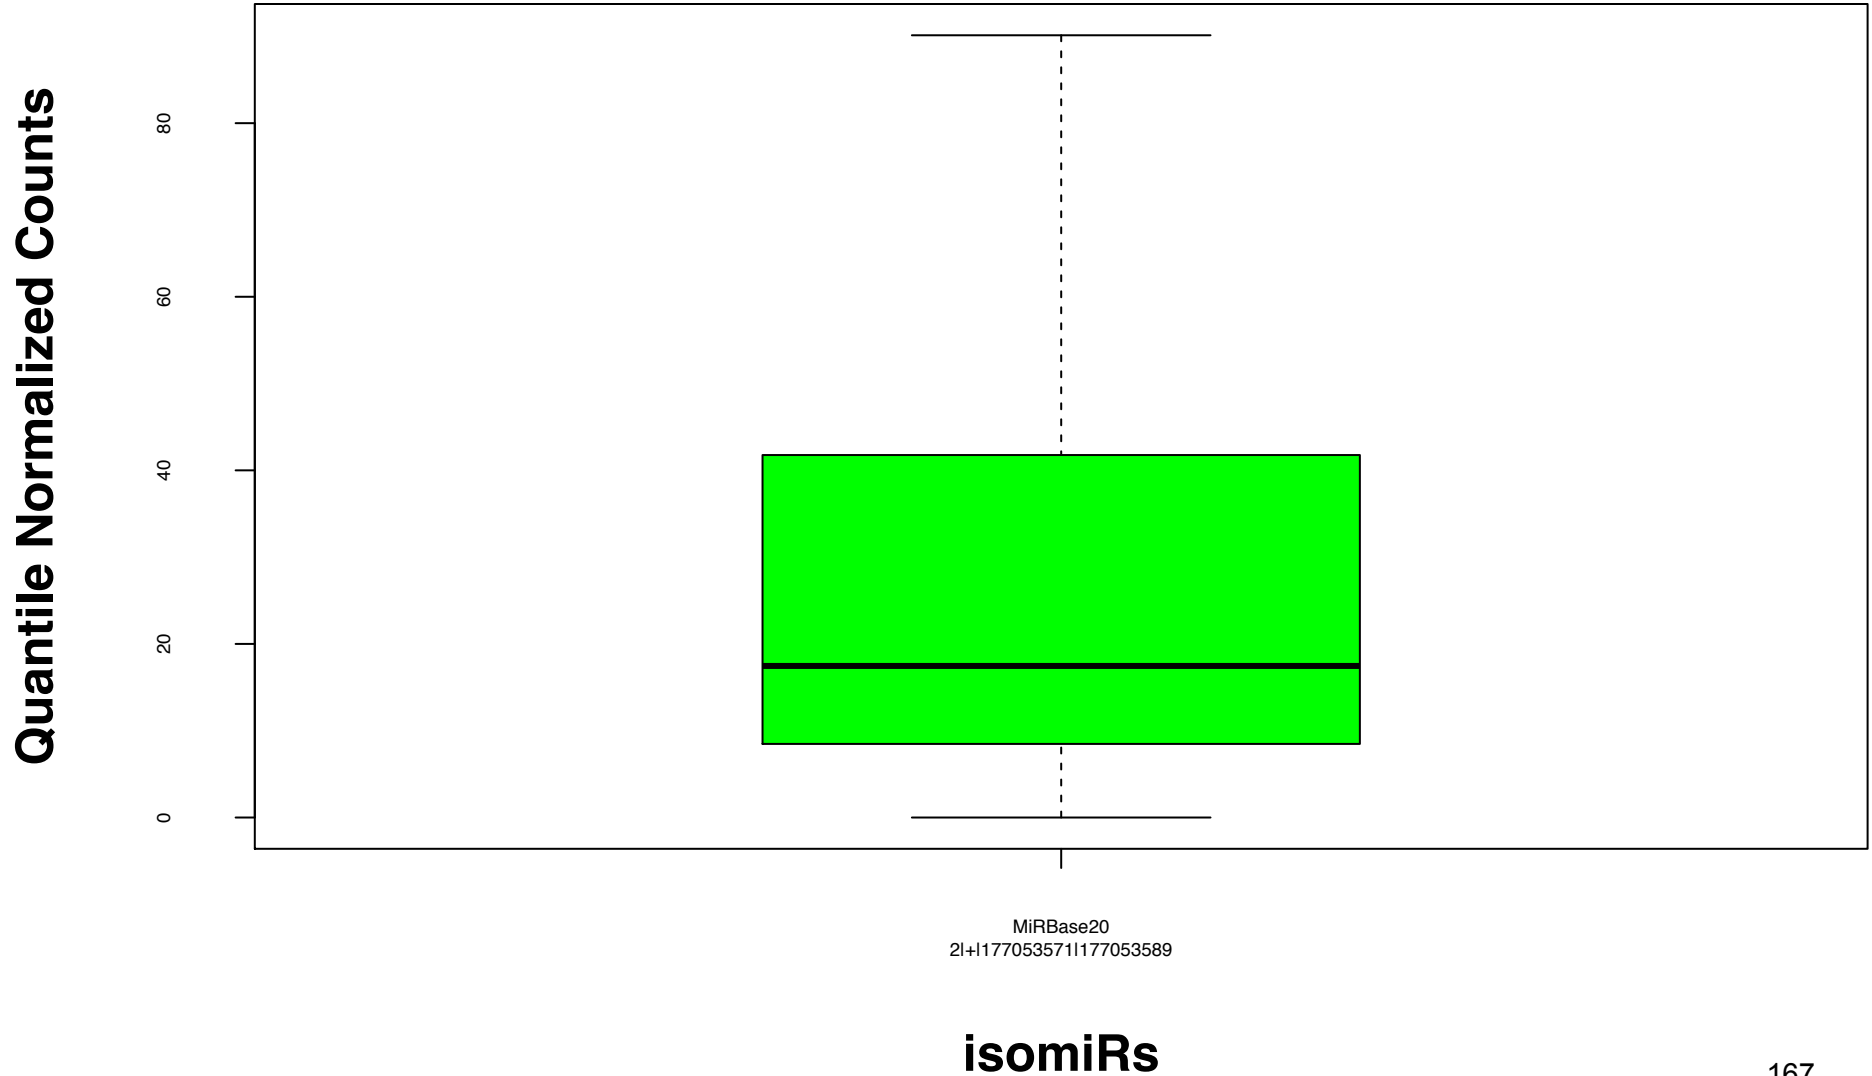



# MIMAT0004500=hsa-miR-26b-3p=MI0000084

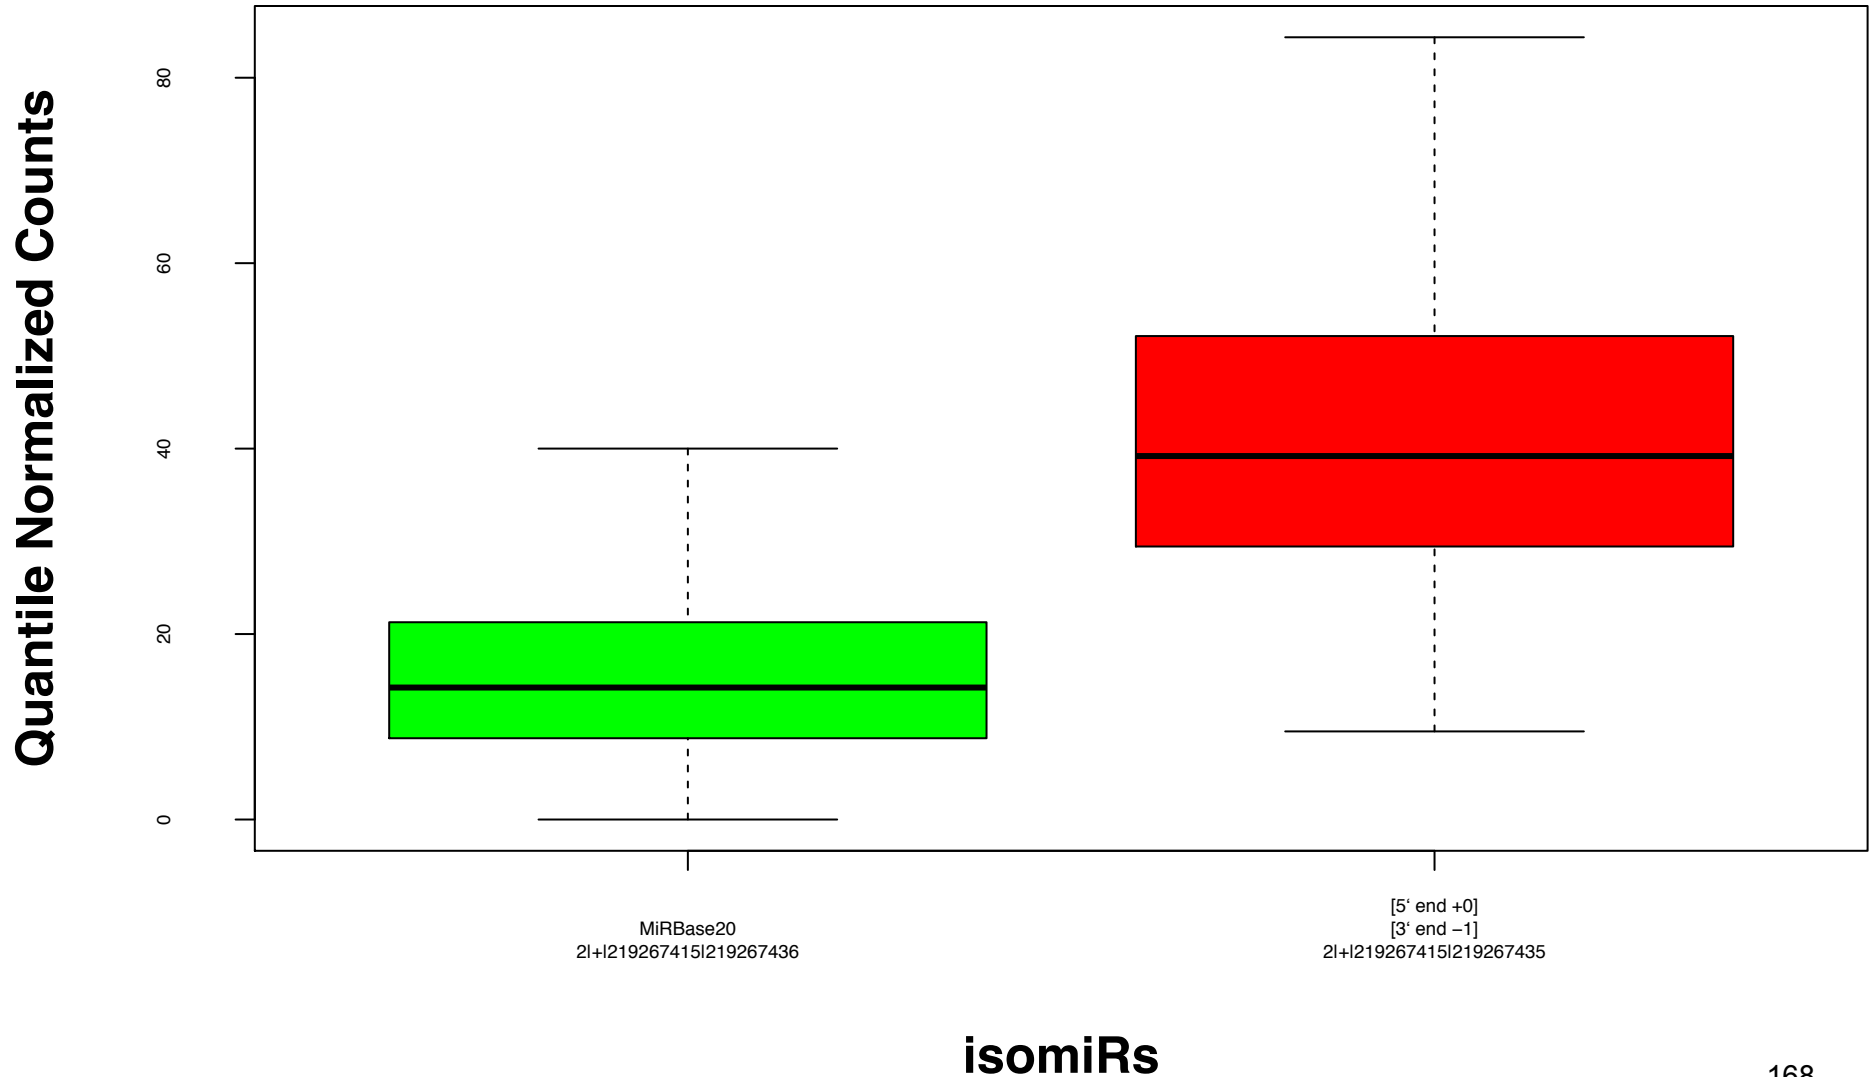

# MIMAT0004949=hsa-miR-877-5p=MI0005561

Quantile Normalized Counts

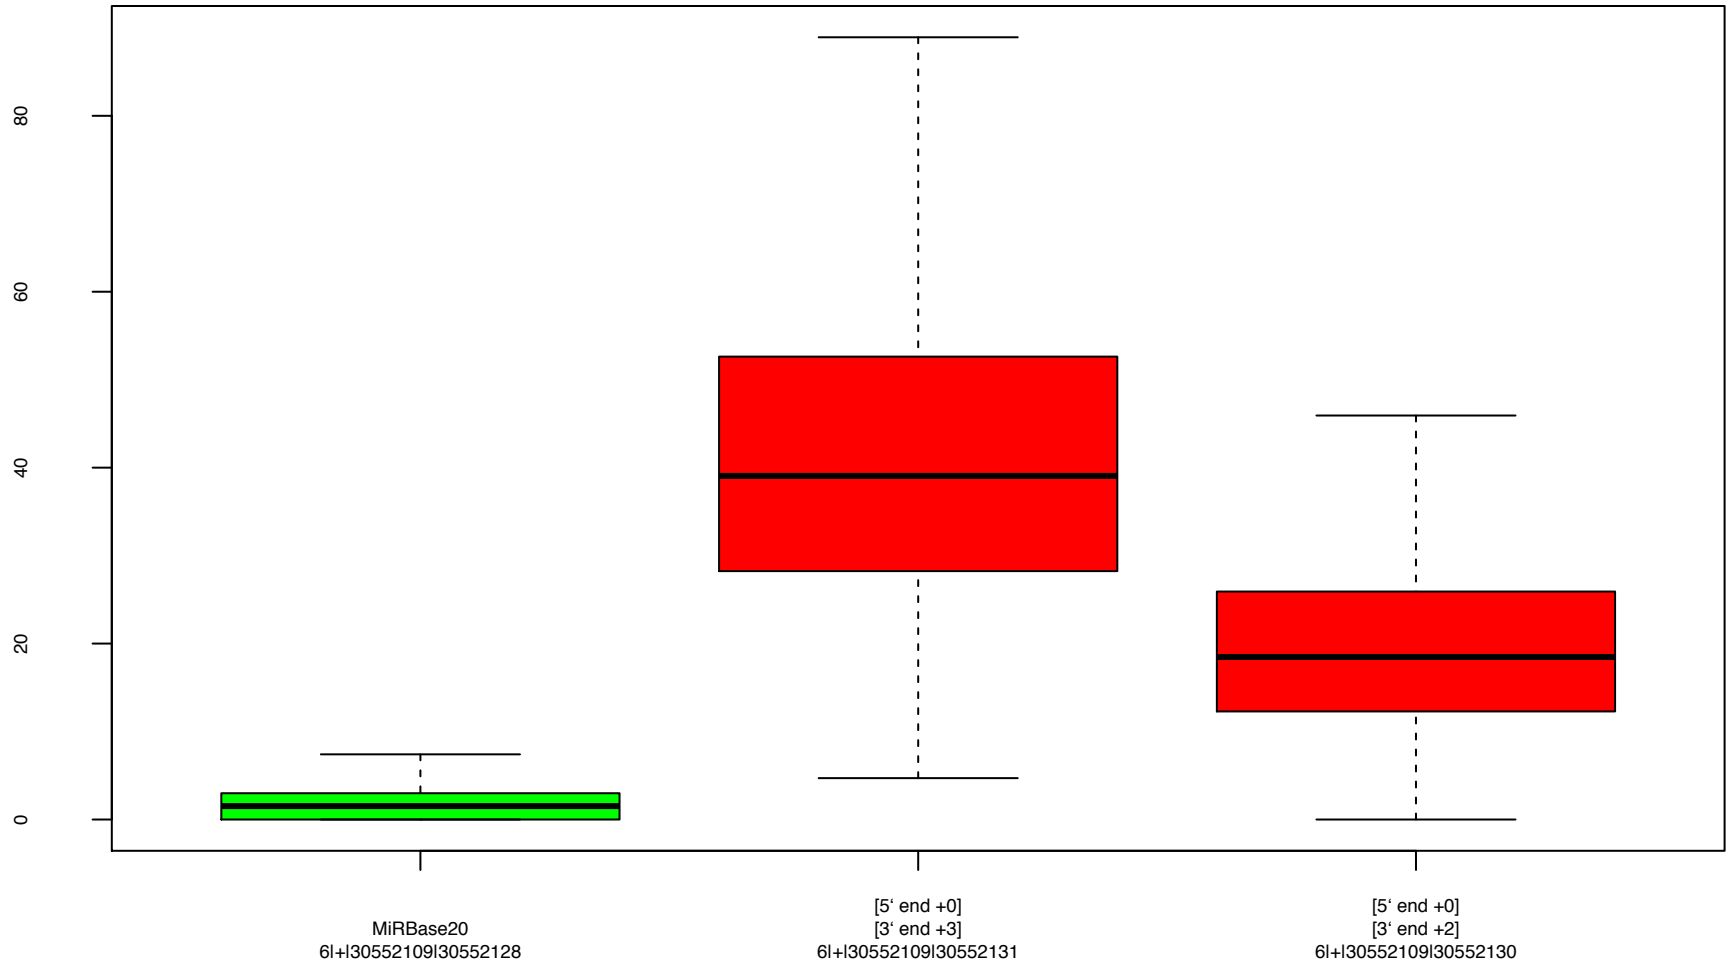

isomiRs

# MIMAT0000761=hsa-miR-324-5p=MI0000813

Quantile Normalized Counts

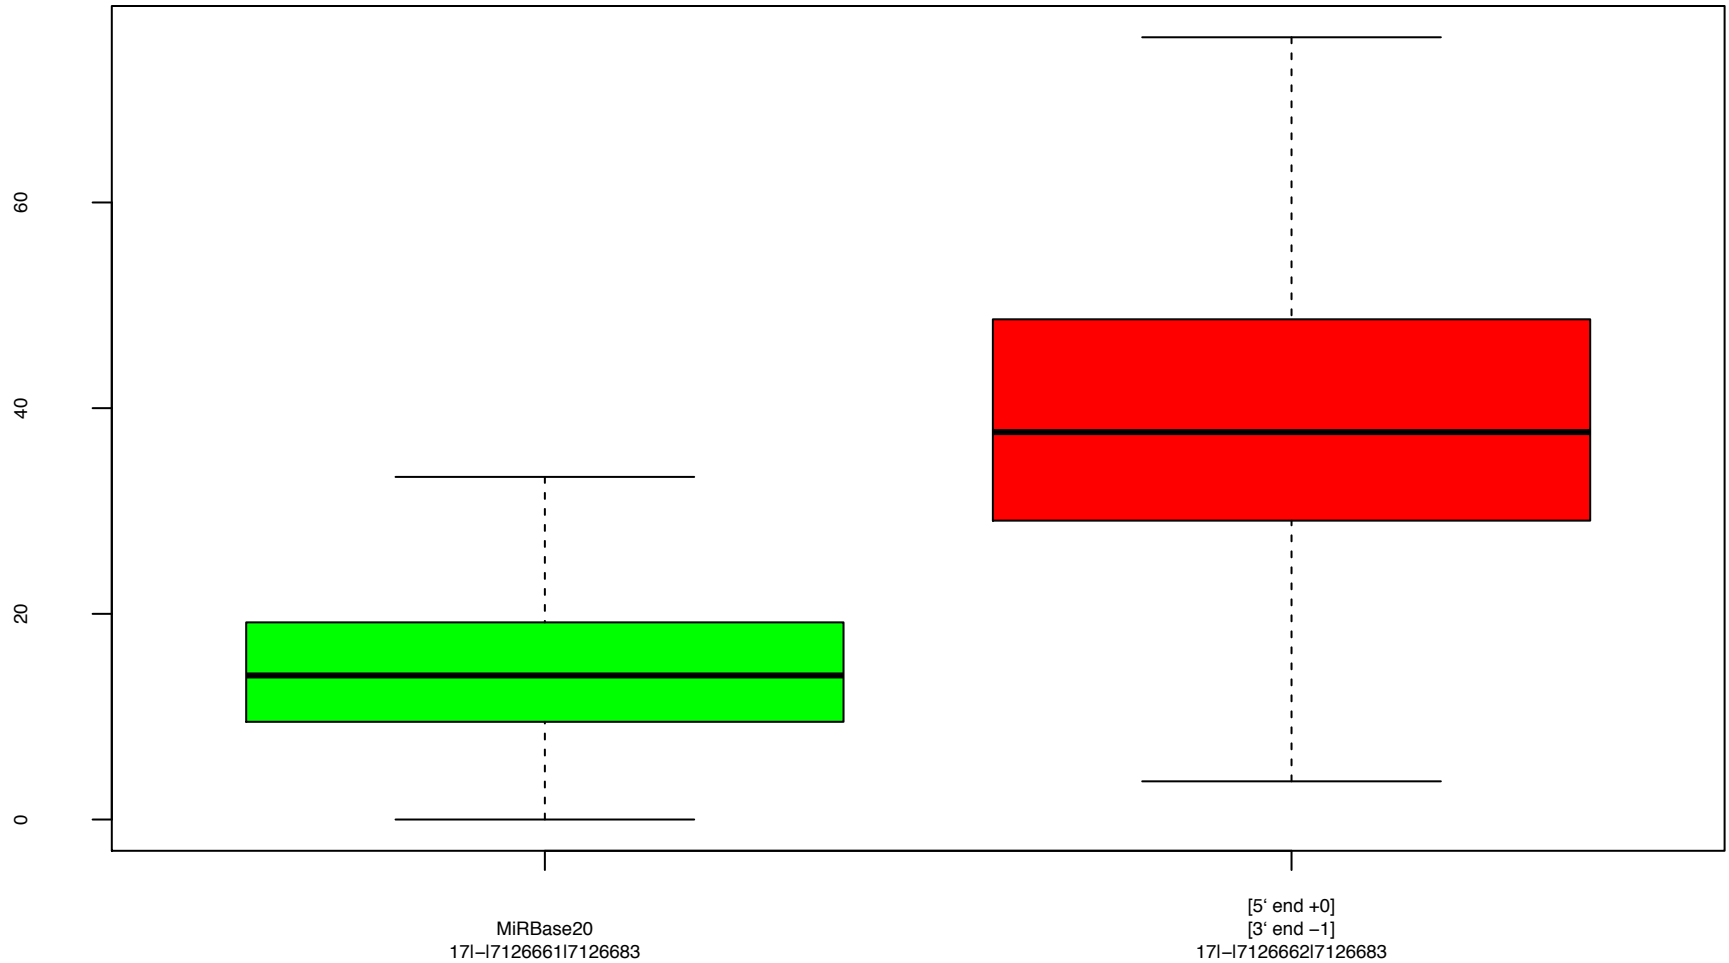

isomiRs

# MIMAT0004570=hsa-miR-223-5p=MI0000300

Quantile Normalized Counts

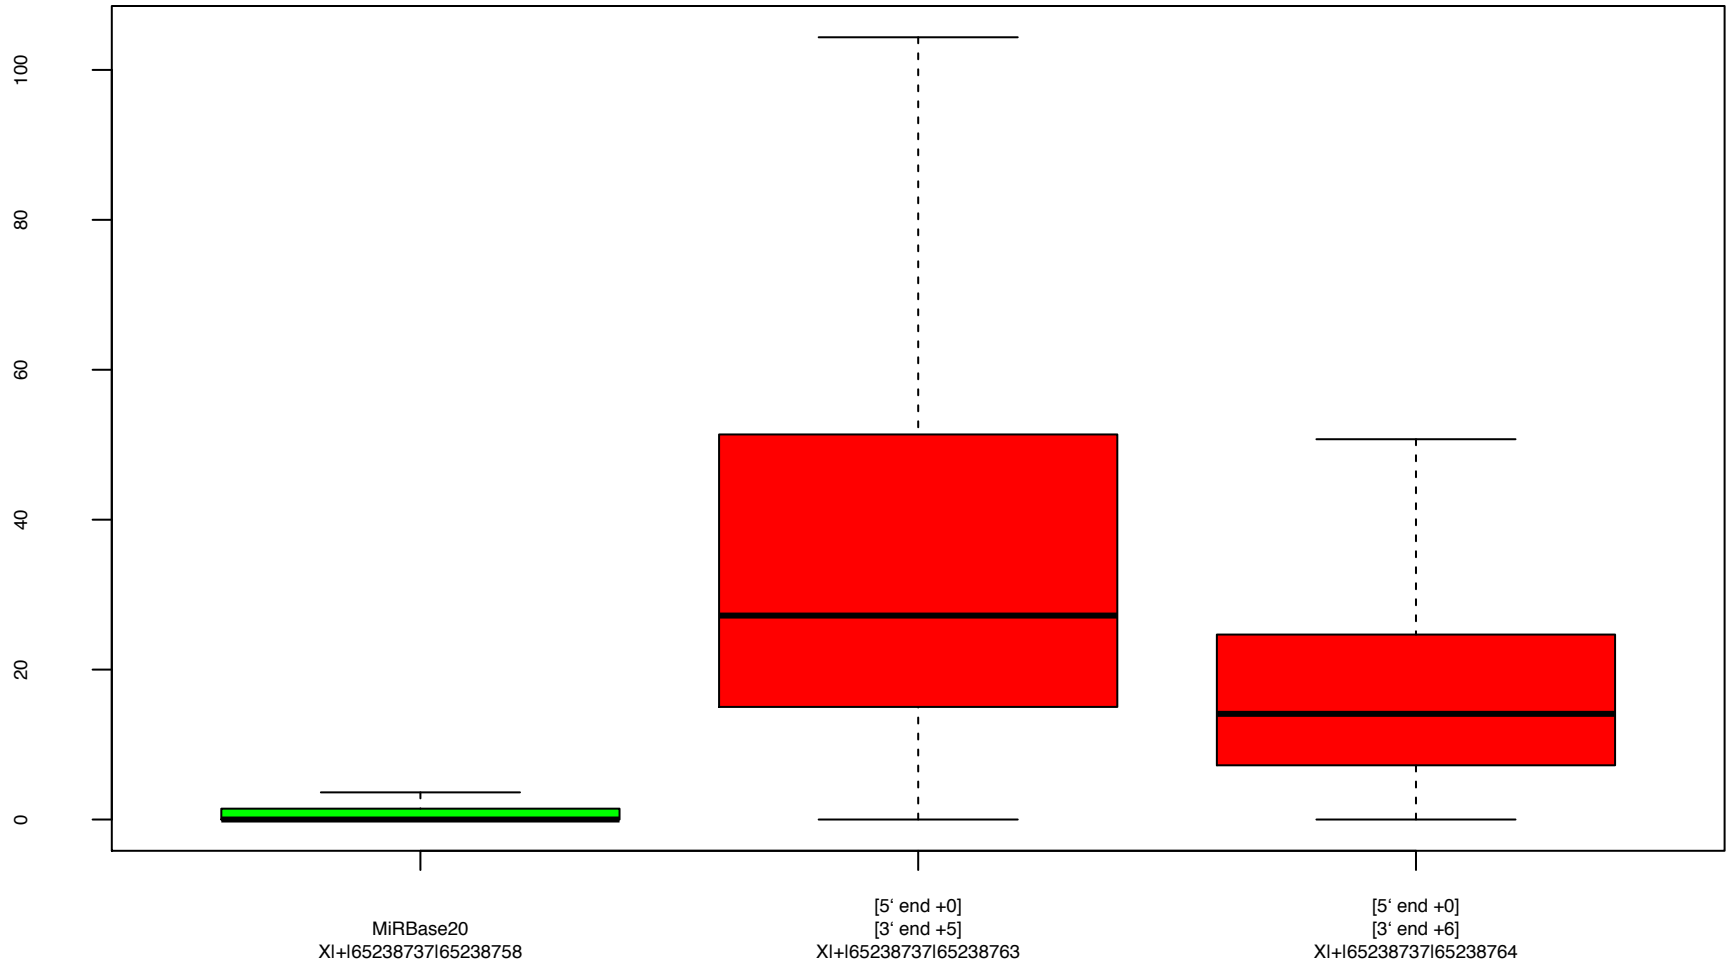

isomiRs

# MIMAT0004673=hsa-miR-29c-5p=MI0000735

Quantile Normalized Counts

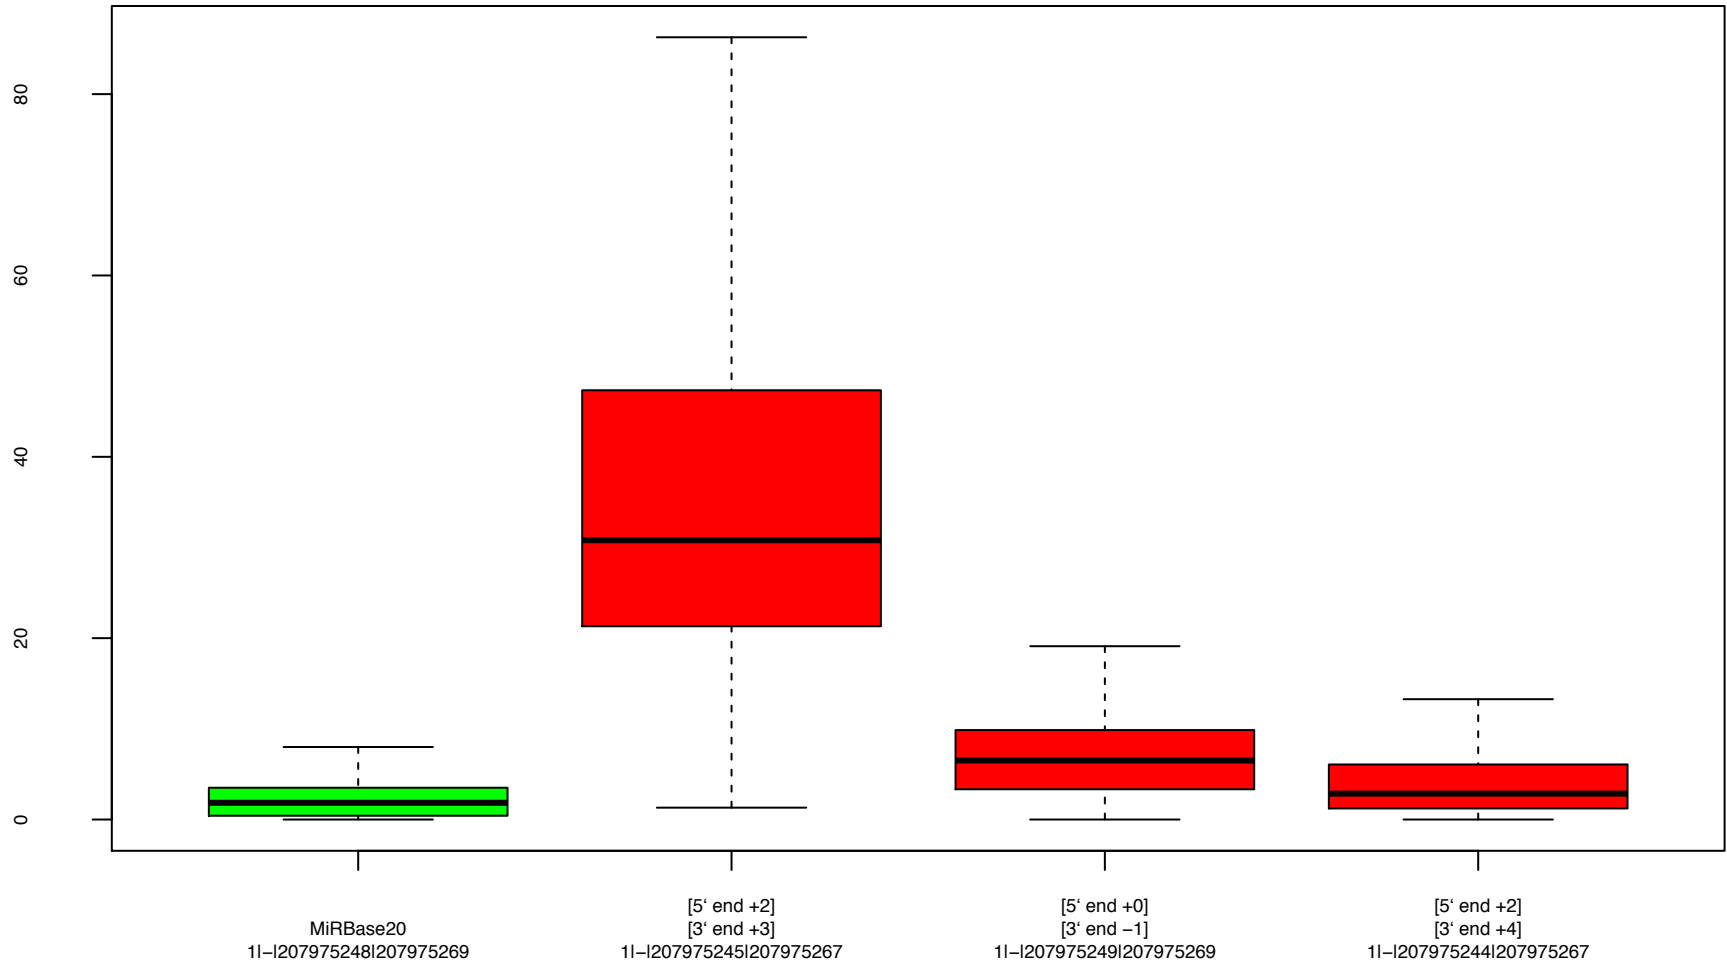

isomiRs

# MIMAT0000460\_1=hsa-miR-194-5p=MI0000732

Quantile Normalized Counts

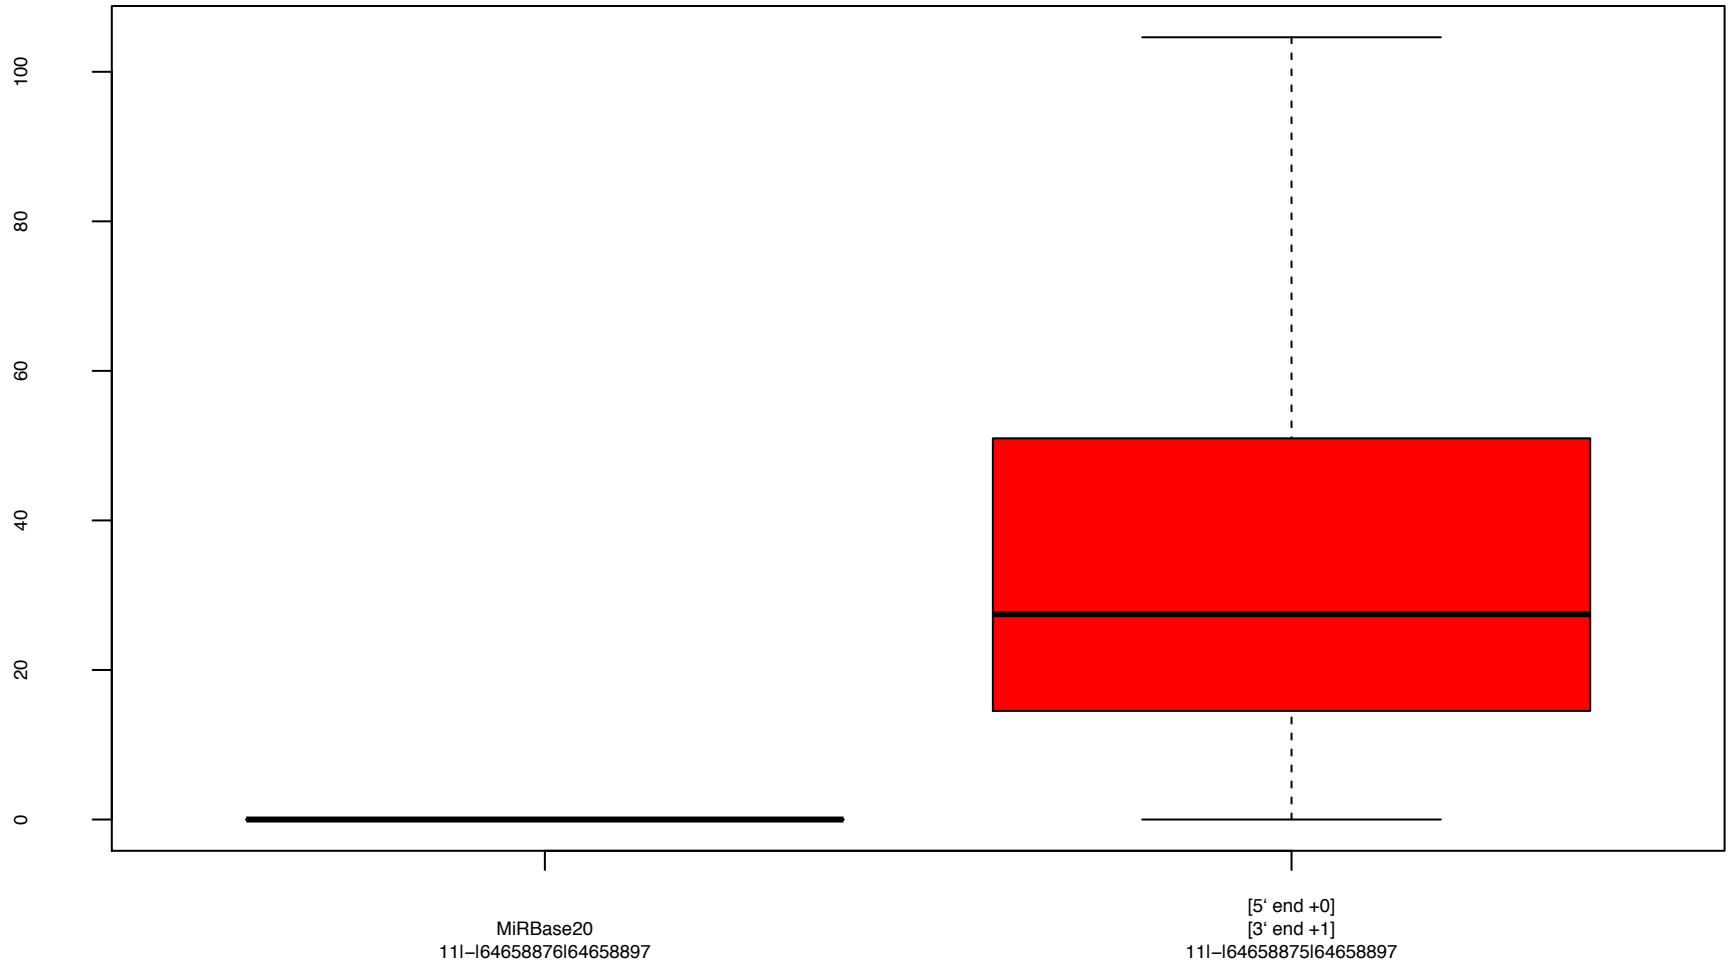

isomiRs

# MIMAT0003242=hsa-miR-577=MI0003584

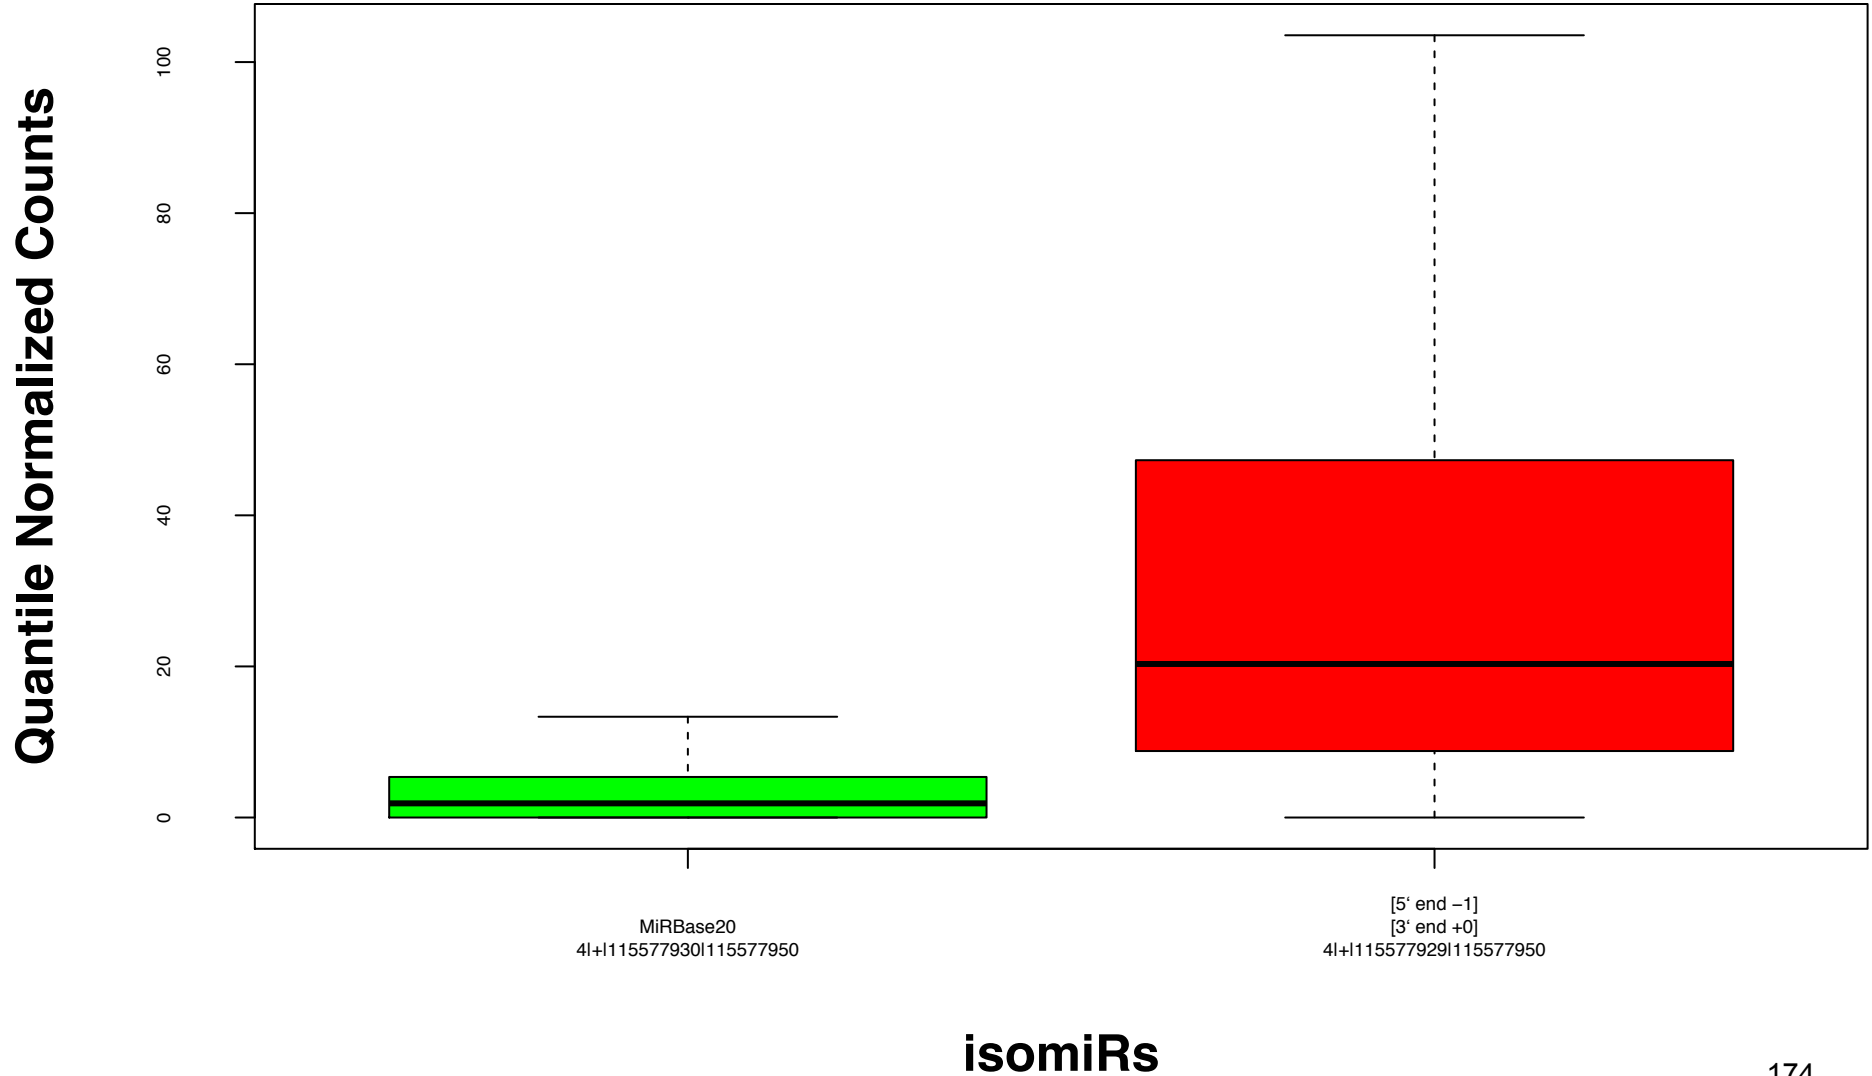

# MIMAT0003884=hsa-miR-454-5p=MI0003820

Quantile Normalized Counts

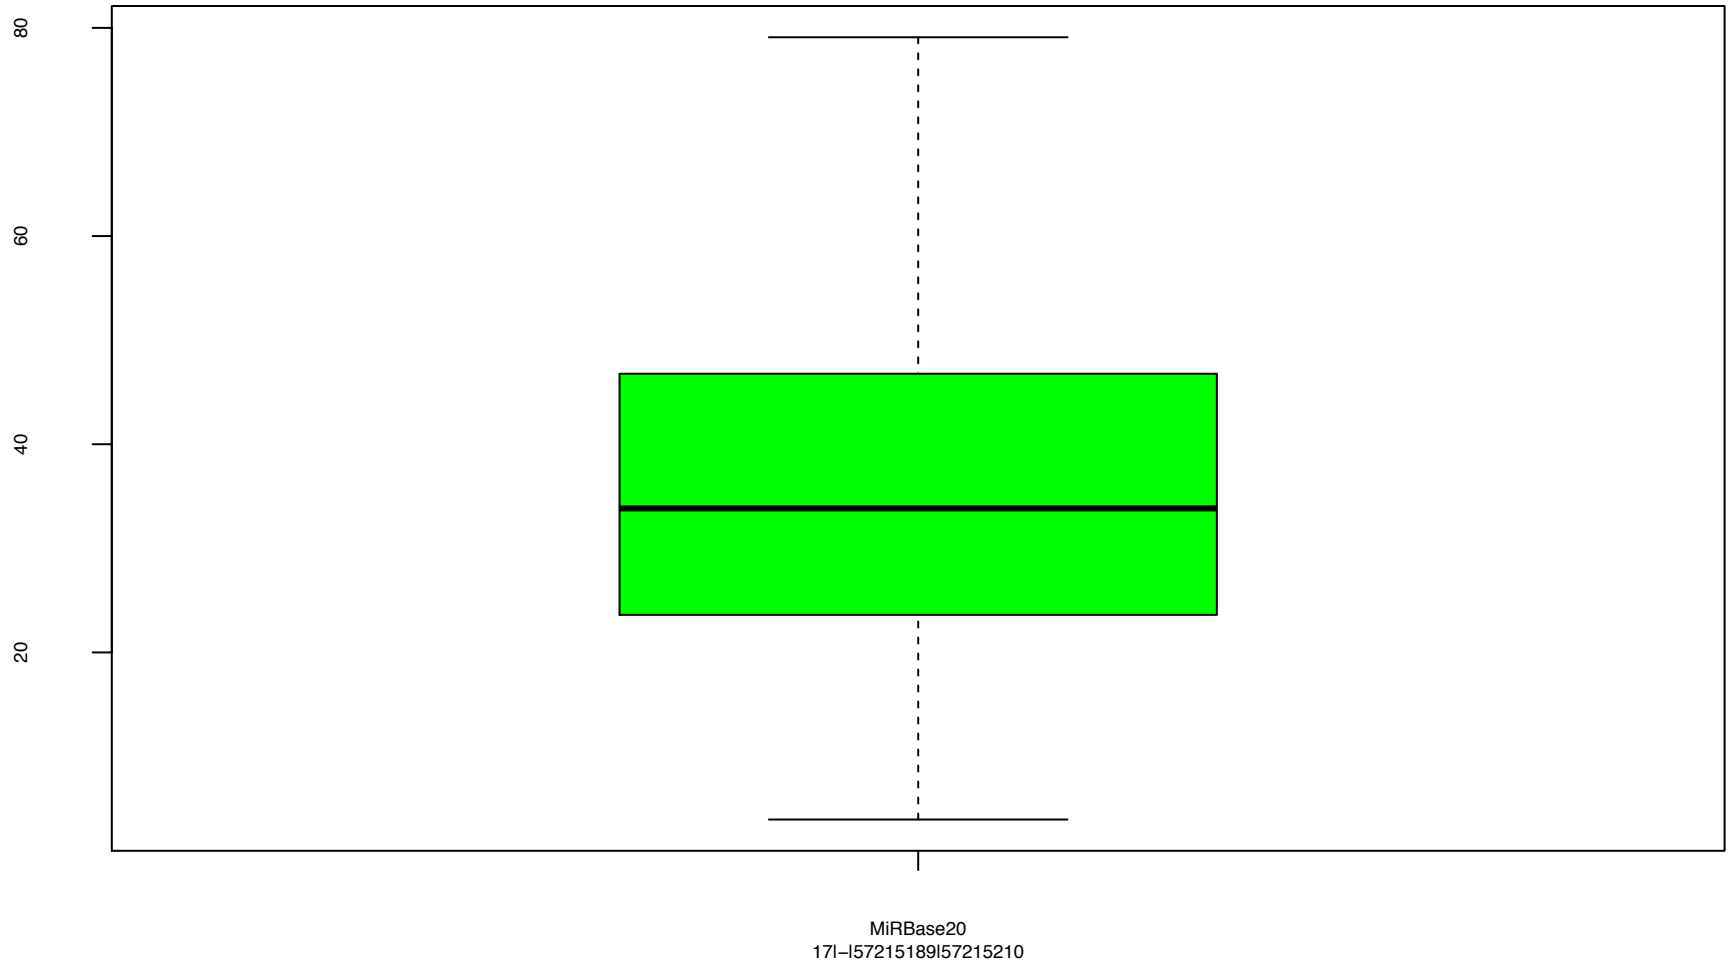

MiRBase20  
171-157215189157215210

isomiRs



# MIMAT0003266=hsa-miR-598-3p=MI0003610

Quantile Normalized Counts

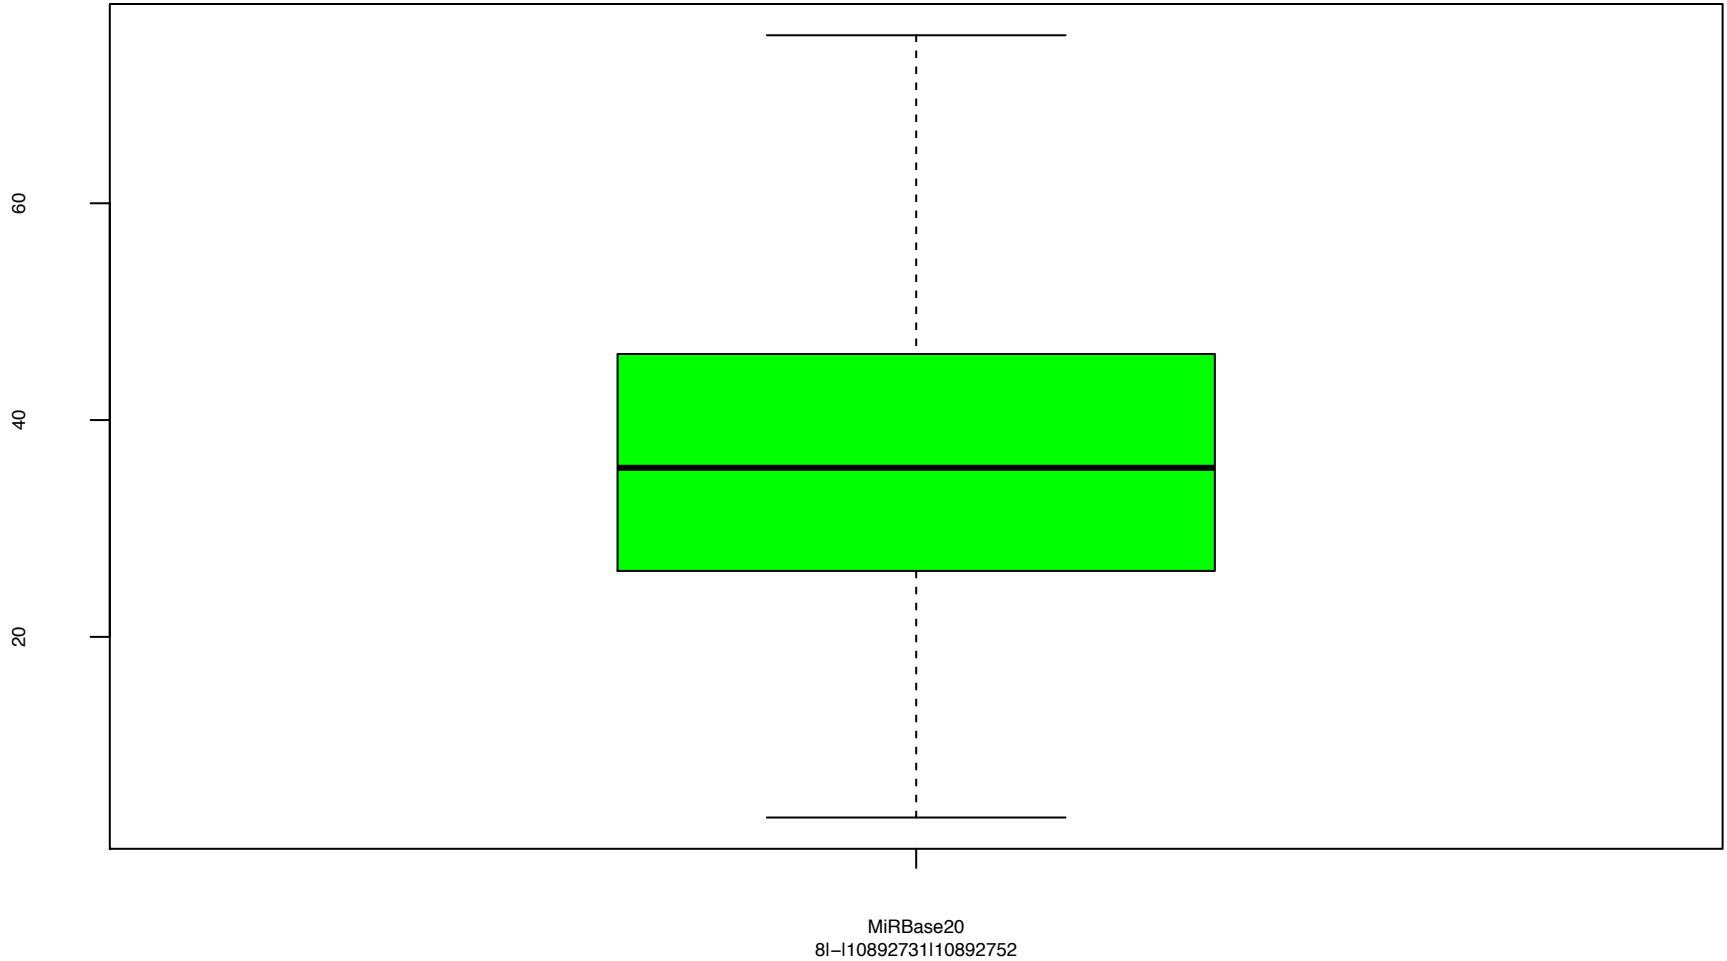

isomiRs

# MIMAT0000097=hsa-miR-99a-5p=MI0000101

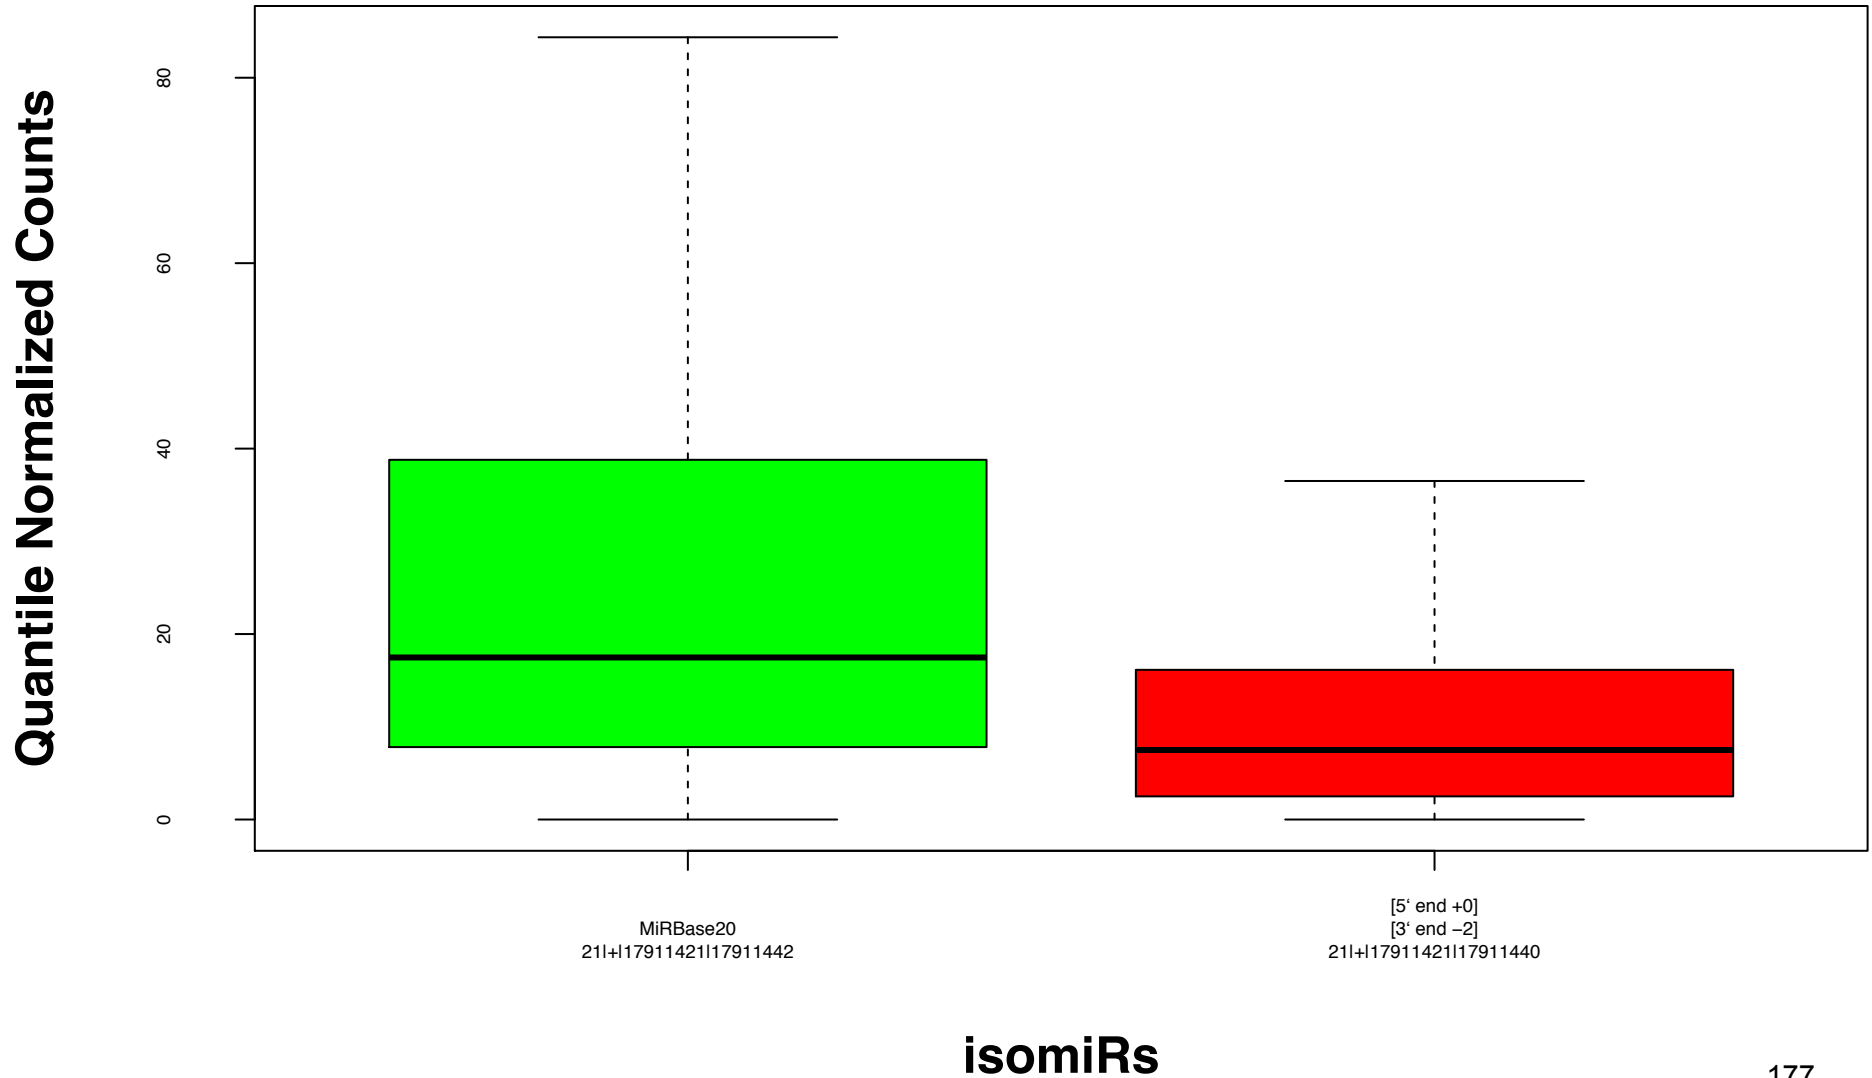

# MIMAT0017992=hsa-miR-3614-5p=MI0016004

Quantile Normalized Counts

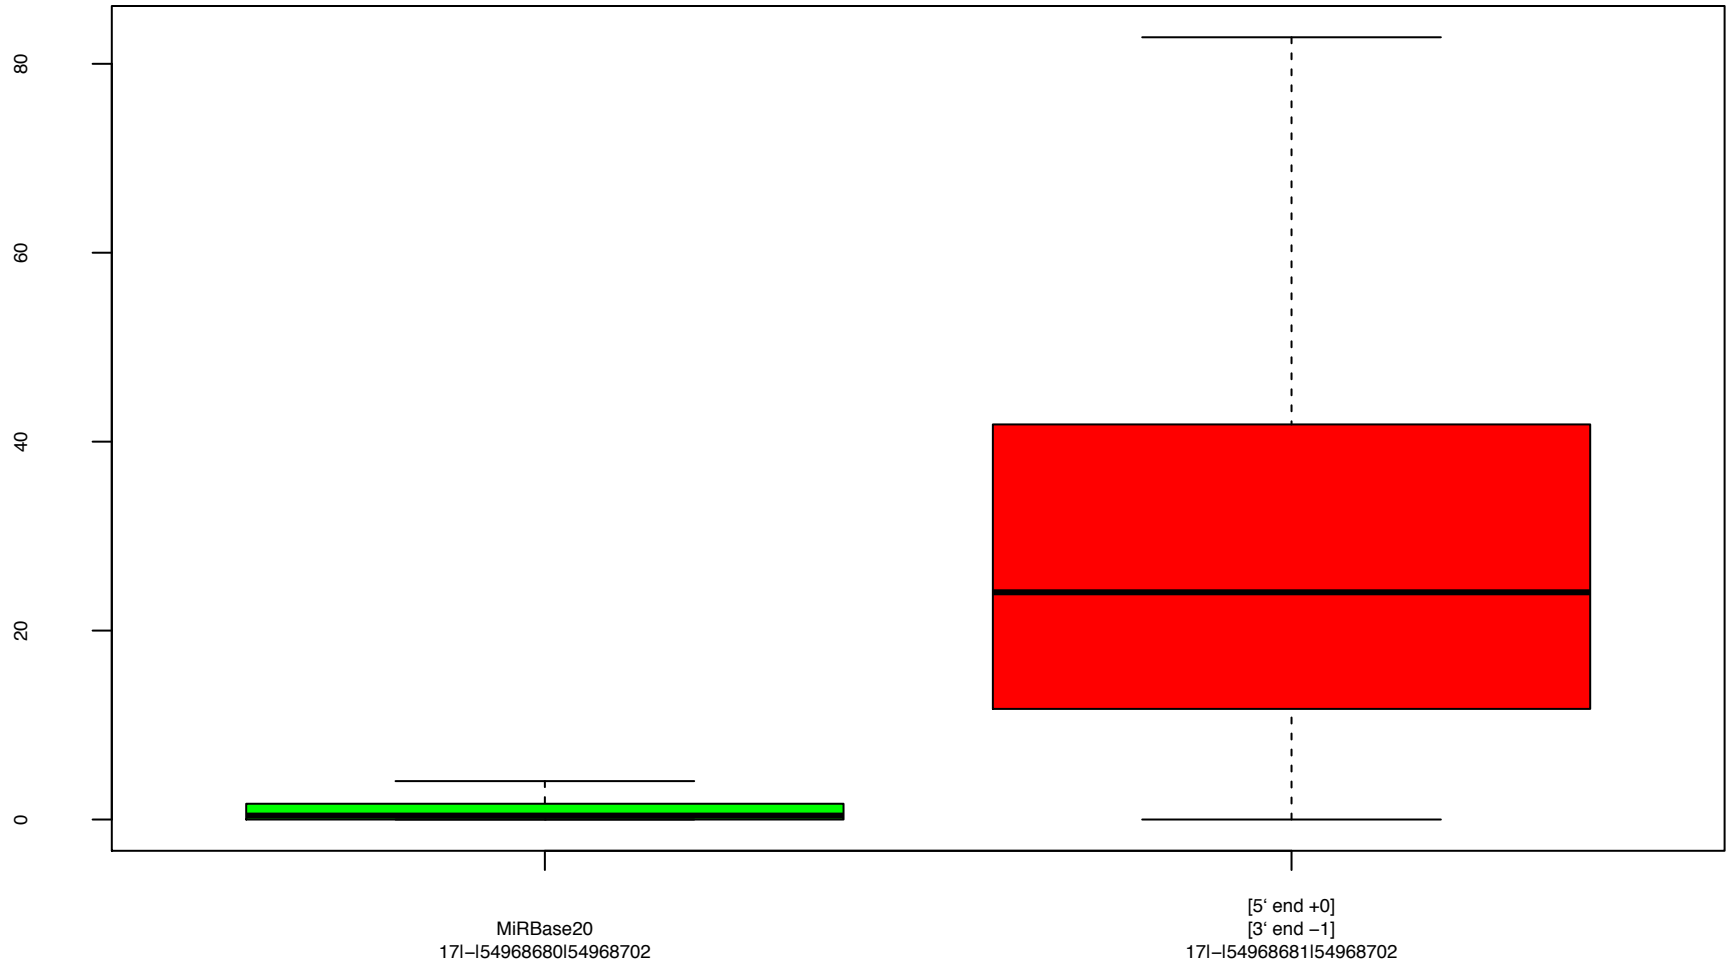

isomiRs

# MIMAT0004589=hsa-miR-30b-3p=MI0000441

Quantile Normalized Counts

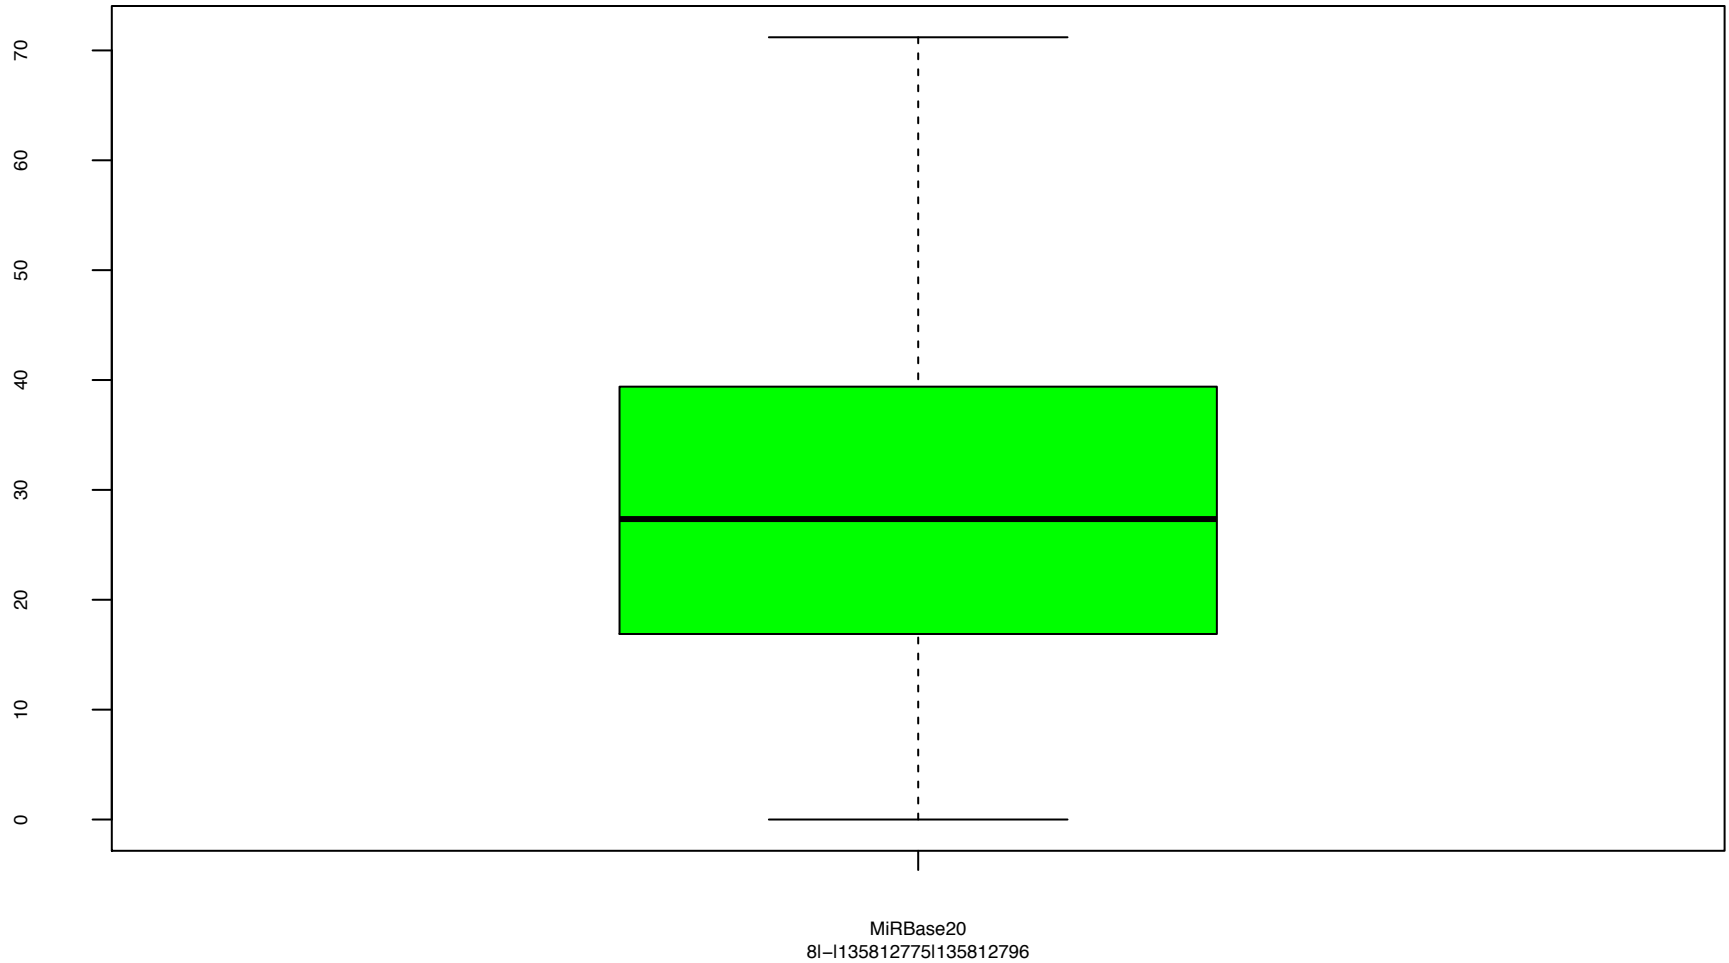

MiRBase20  
8l-11358127751135812796

isomiRs

# MIMAT0009199=hsa-miR-365a-5p=MI0000767

Quantile Normalized Counts

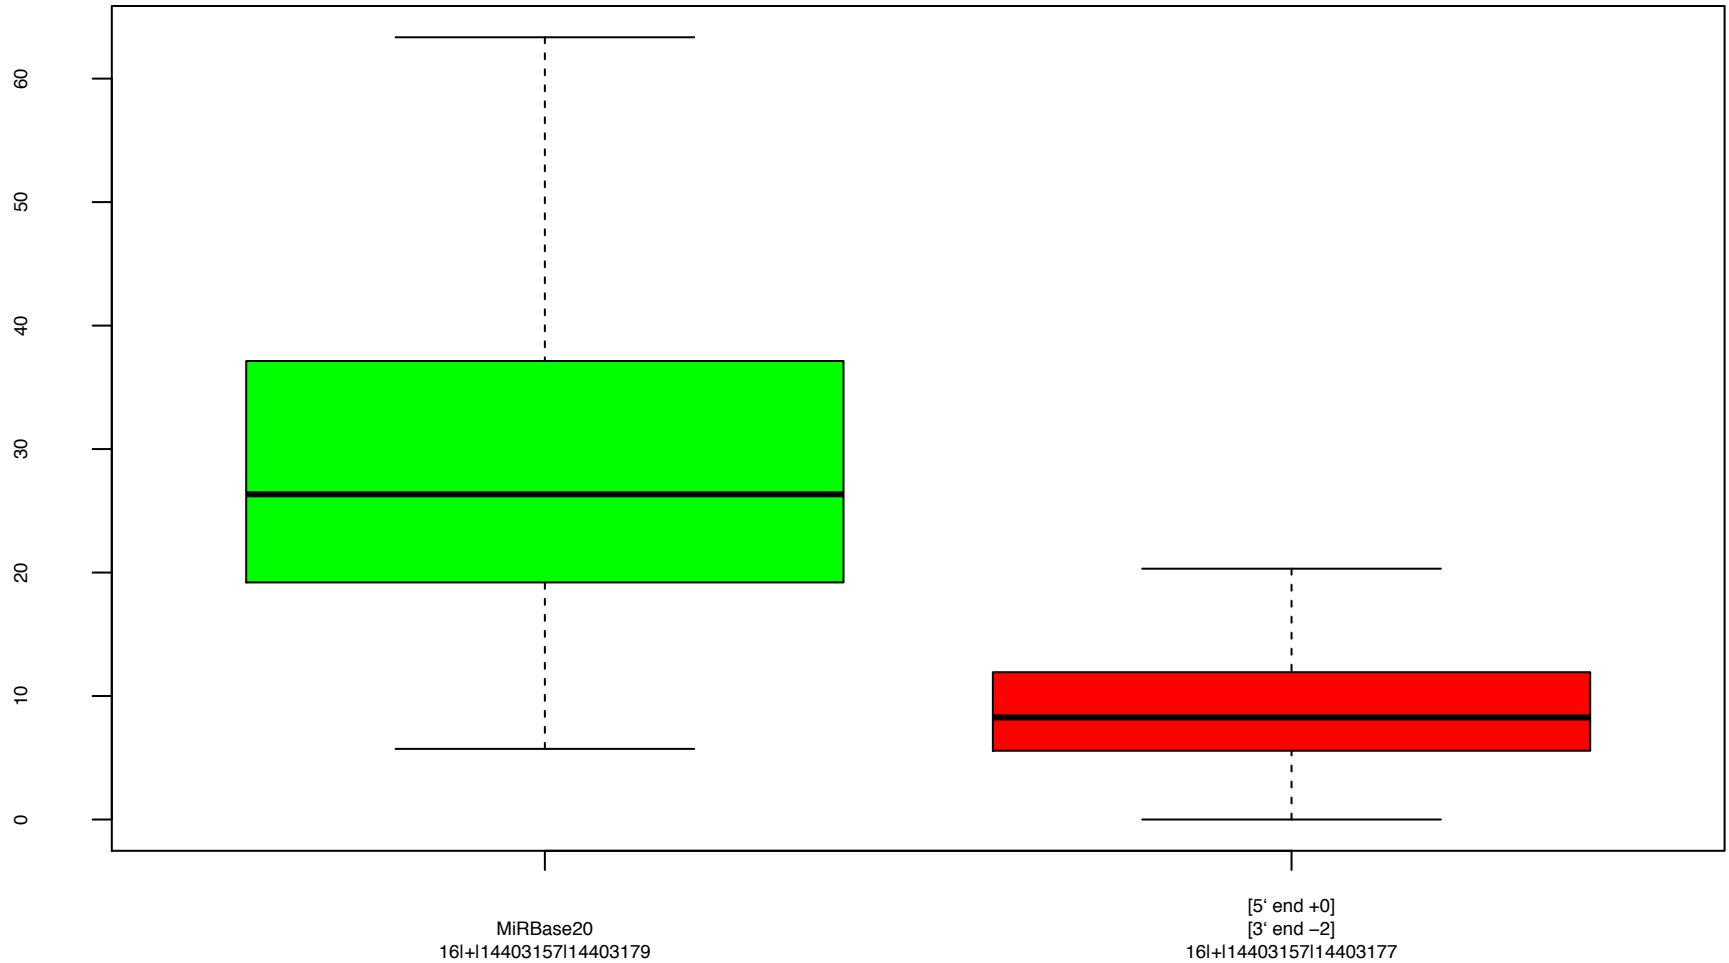

isomiRs

# MIMAT0000280=hsa-miR-223-3p=MI0000300

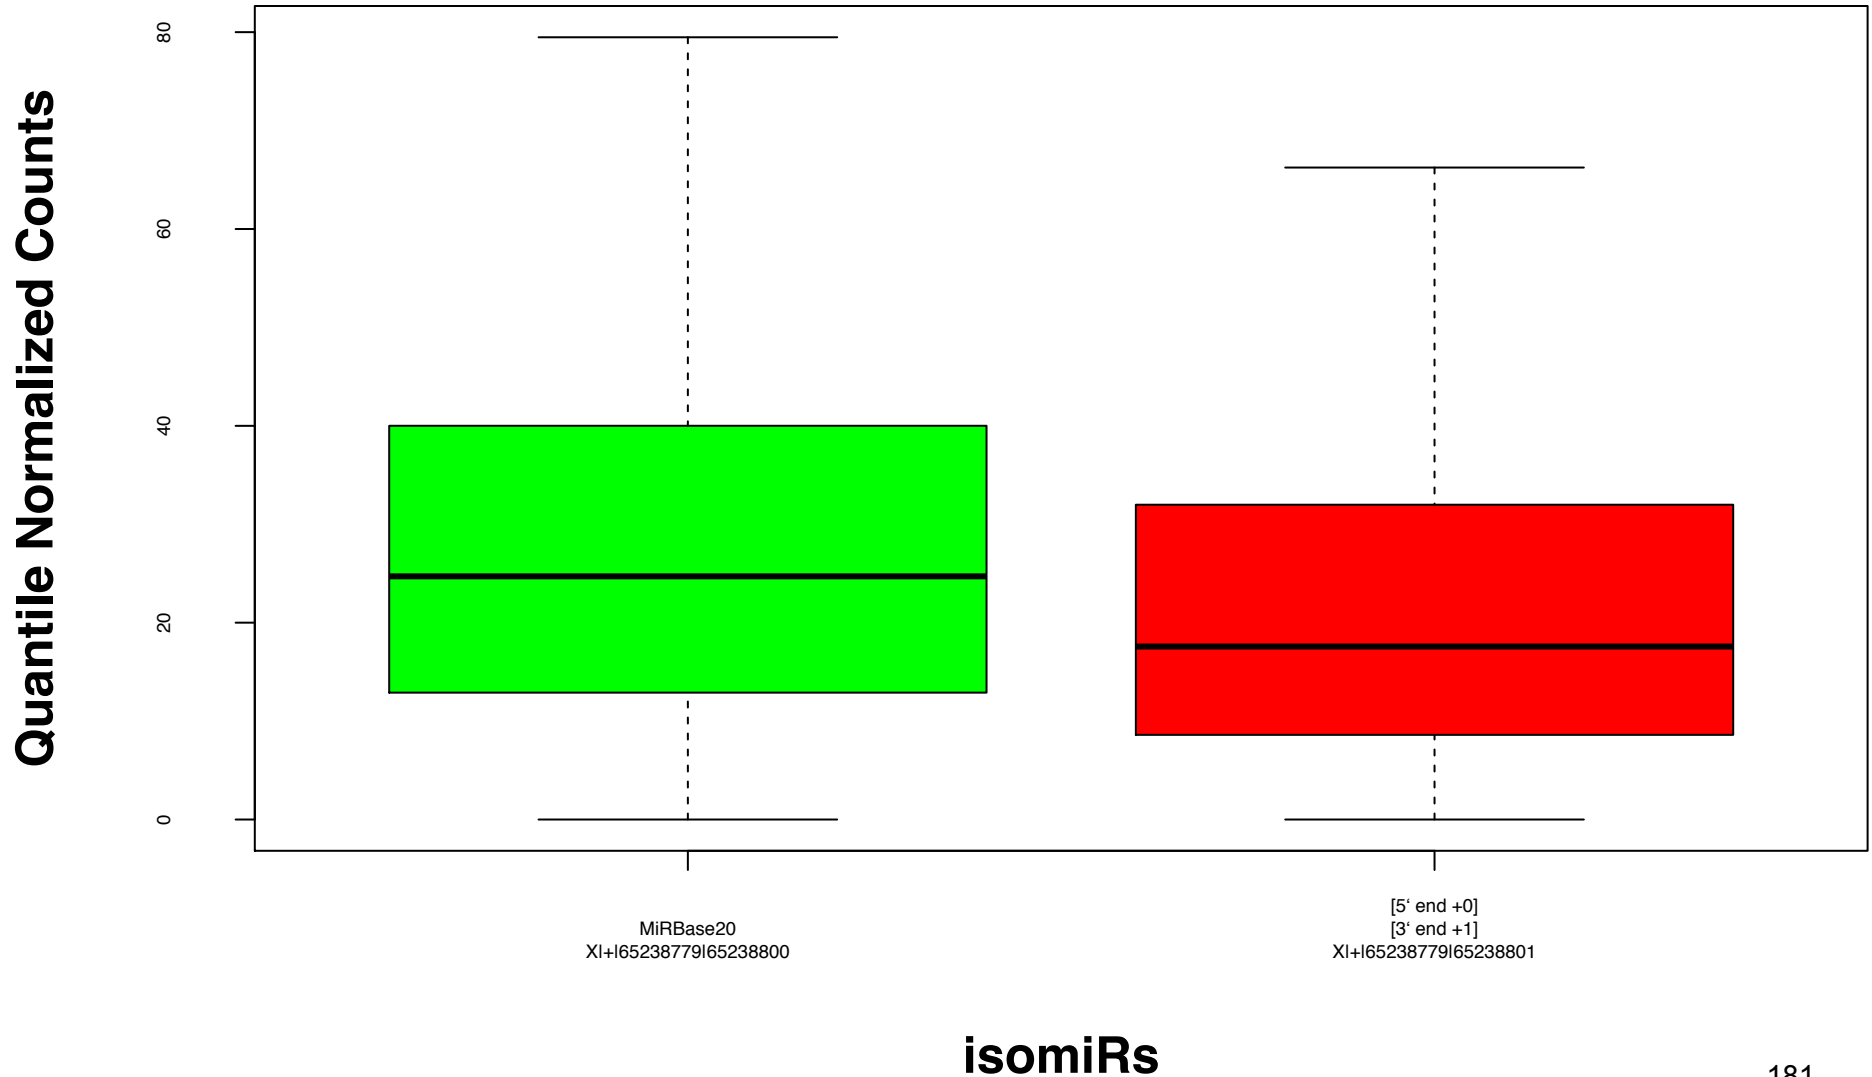

# MIMAT0005825=hsa-miR-1180-3p=MI0006273

Quantile Normalized Counts

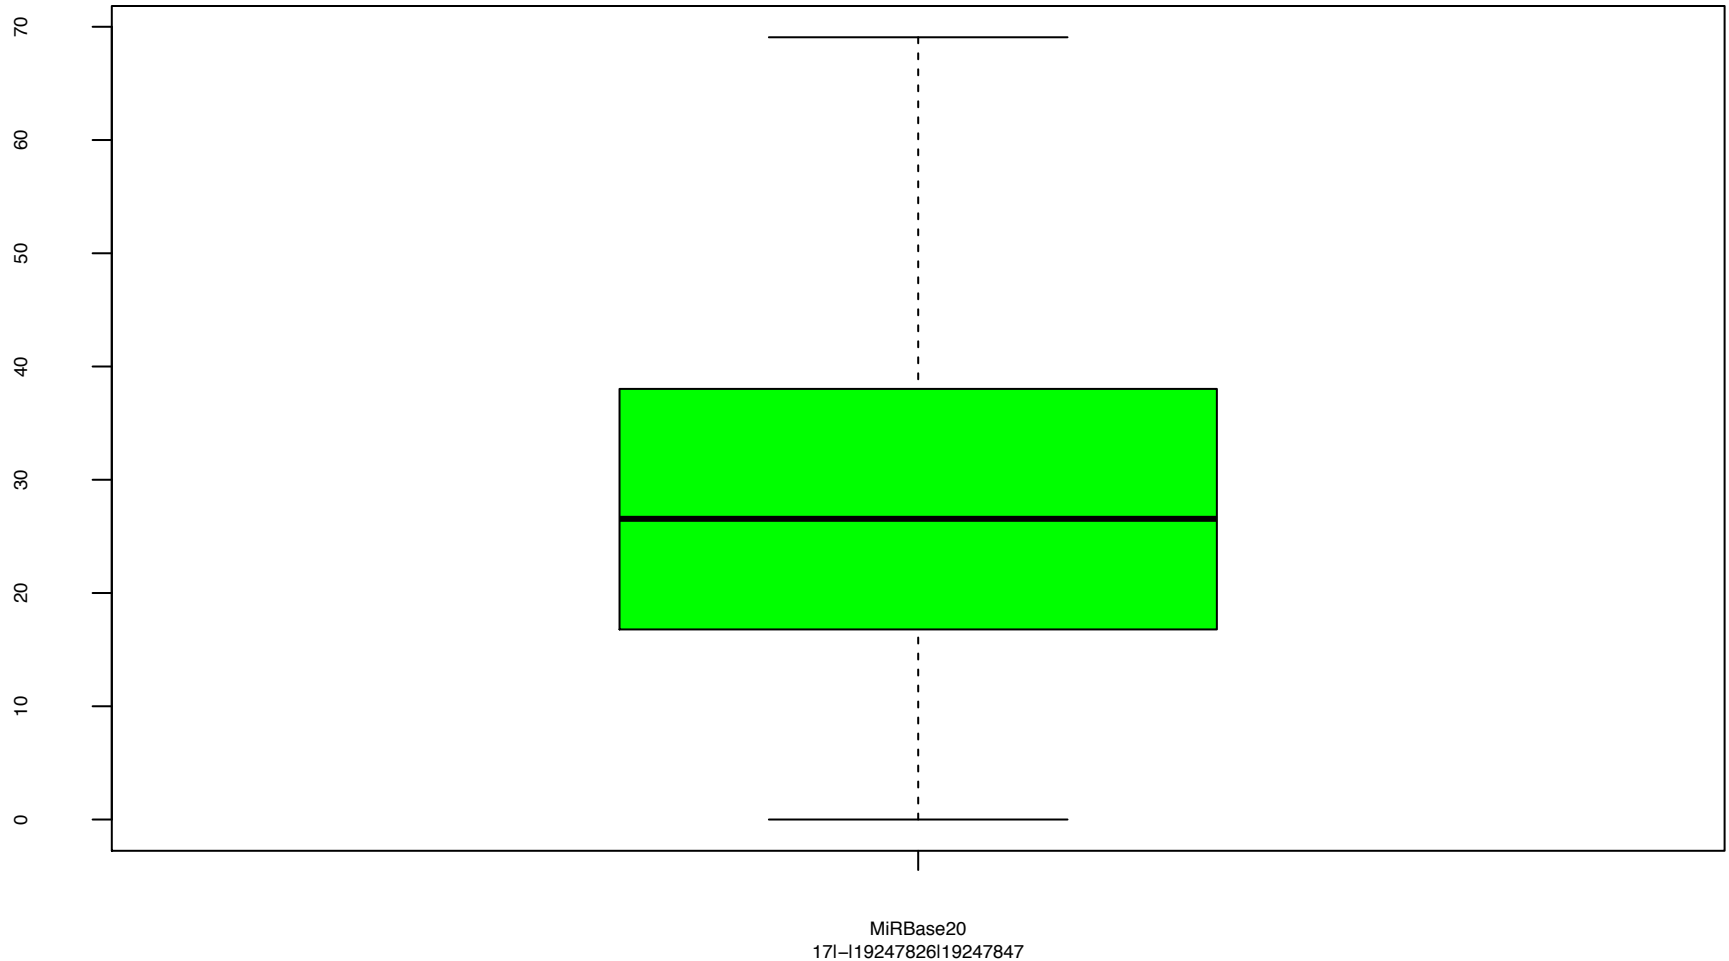

MiRBase20  
171-119247826|19247847

isomiRs

# MIMAT0004509=hsa-miR-93-3p=MI0000095

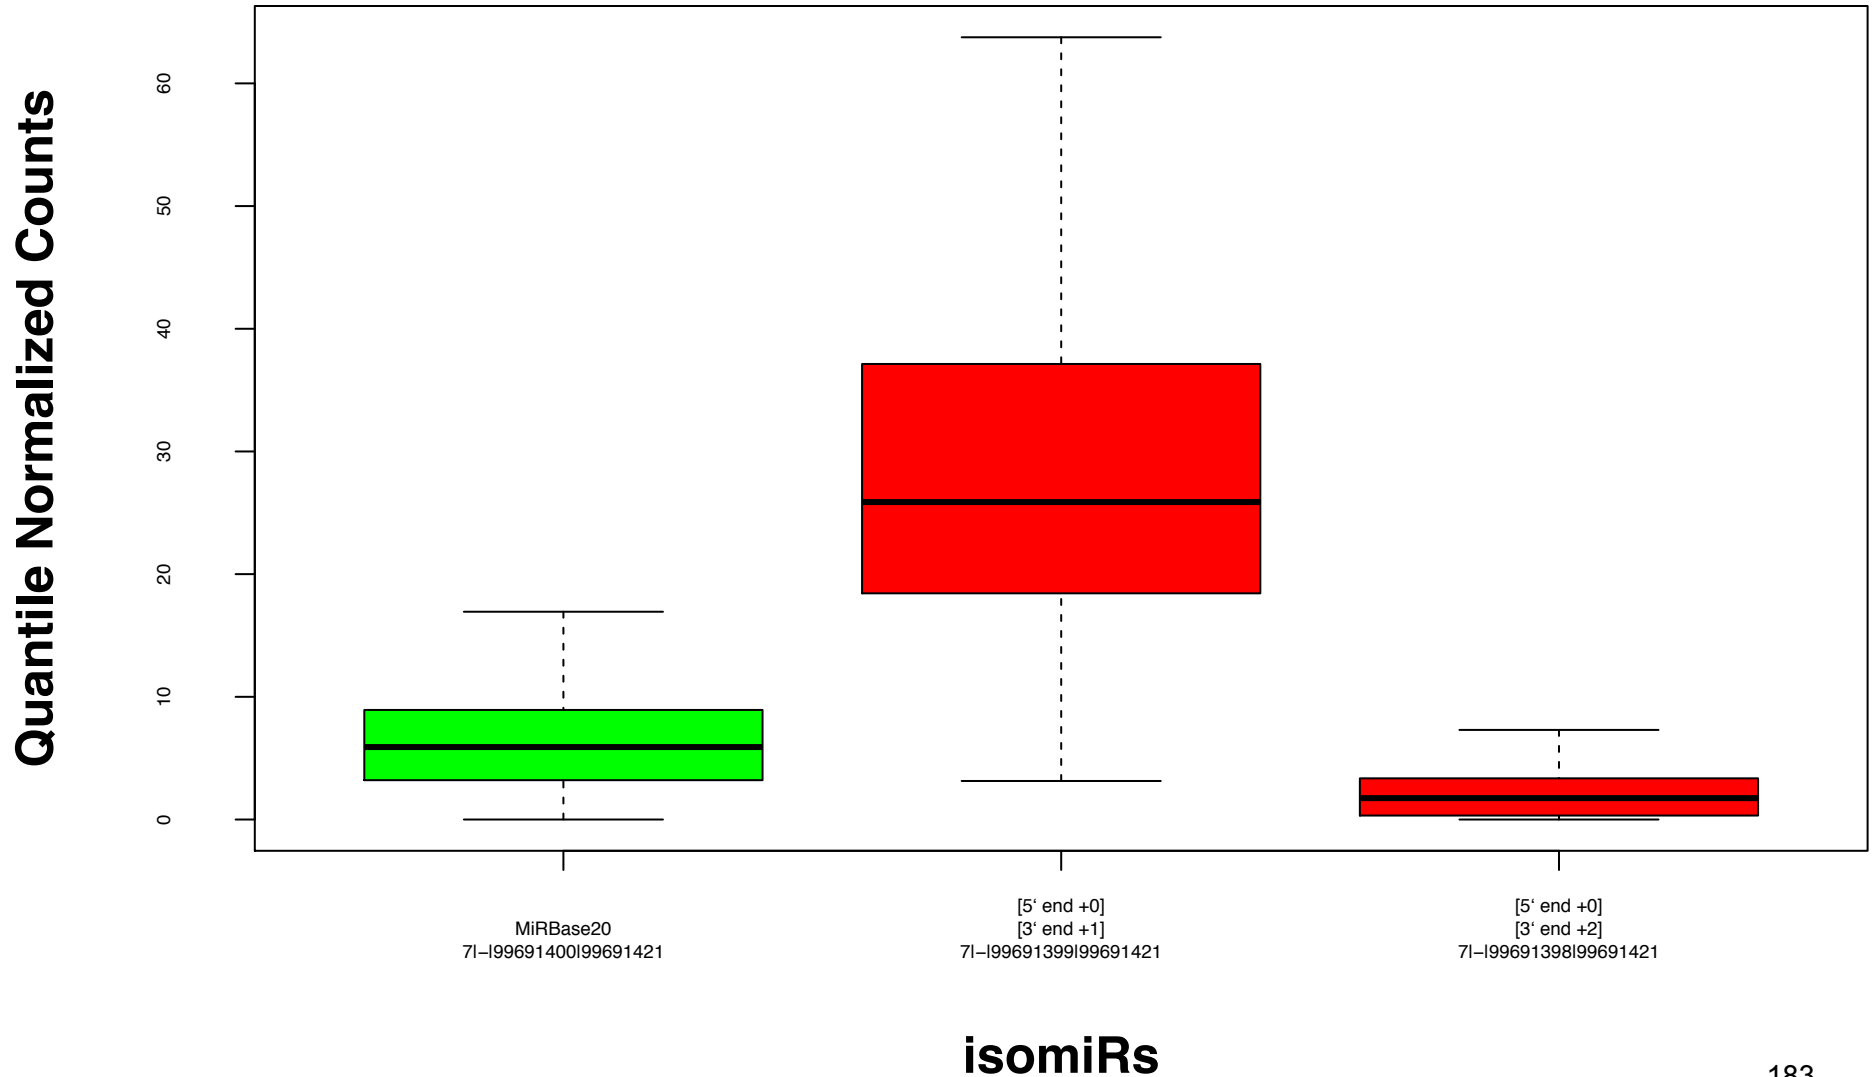



# MIMAT0019058=hsa-miR-4521=MI0016887

Quantile Normalized Counts

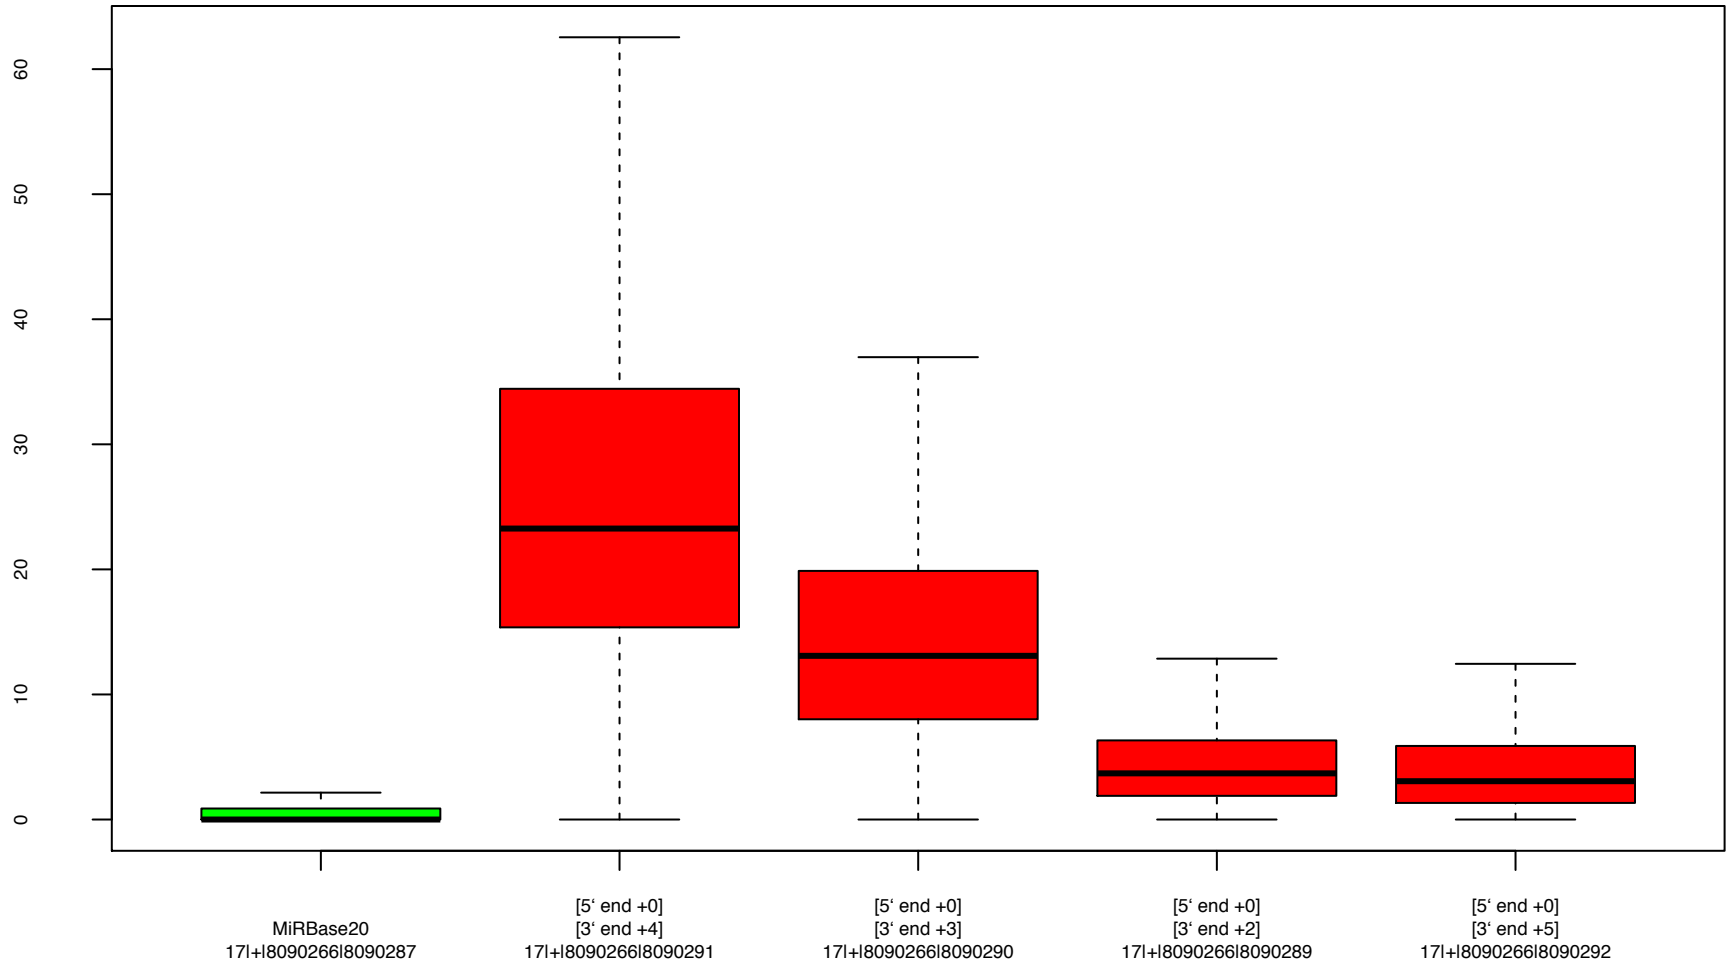

isomiRs

# MIMAT0005797=hsa-miR-1301-3p=MI0003815

Quantile Normalized Counts

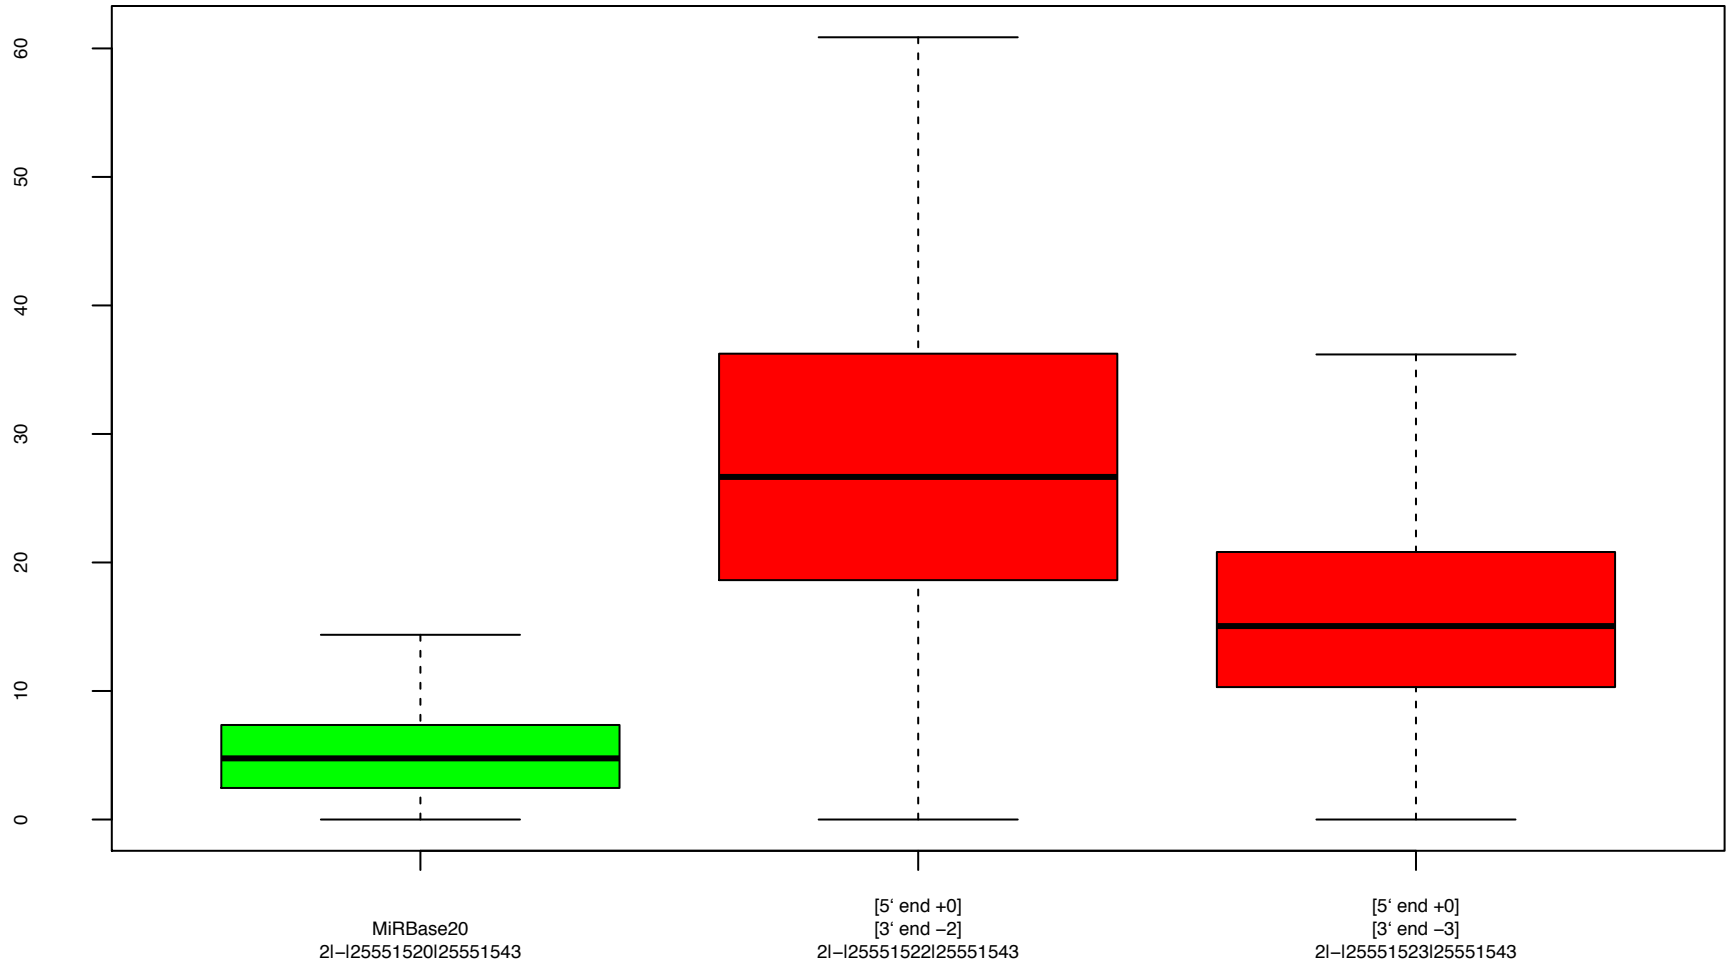

isomiRs

# MIMAT0004797=hsa-miR-582-3p=MI0003589

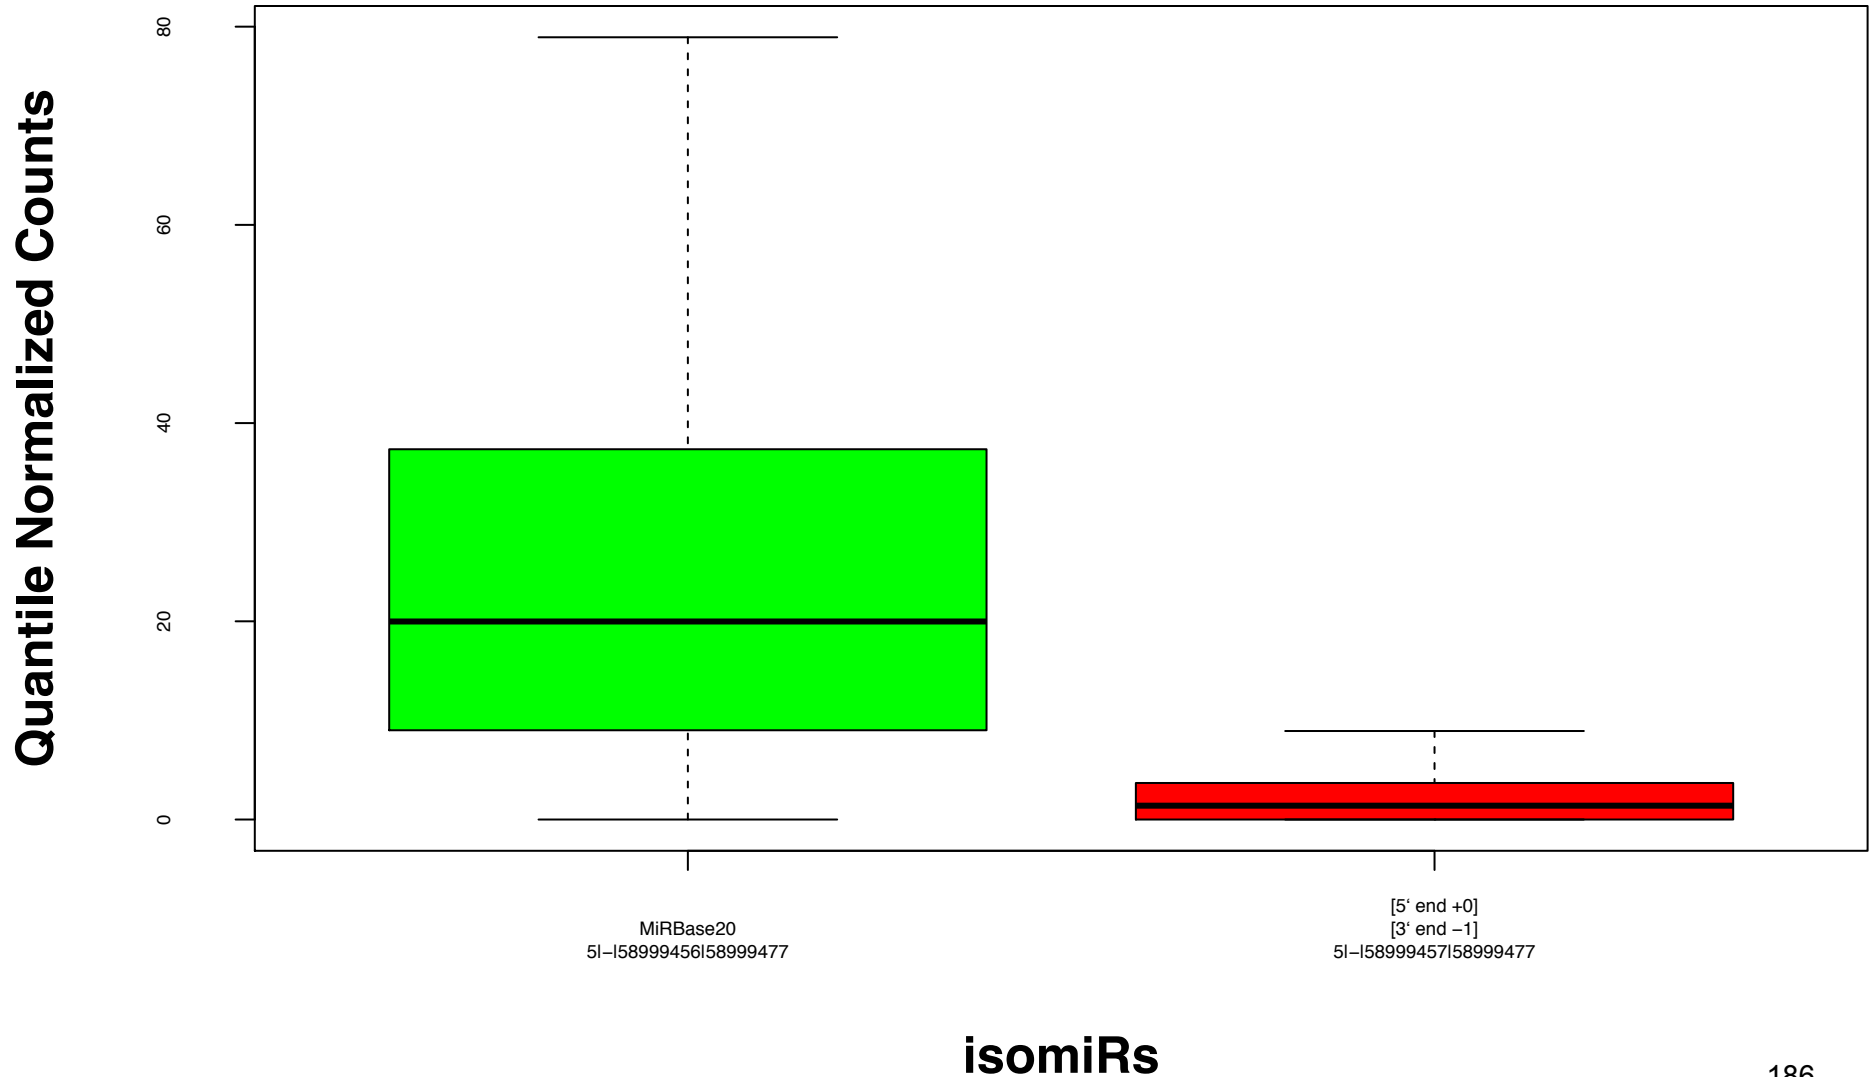

# MIMAT0004486=hsa-let-7f-1-3p=MI0000067

Quantile Normalized Counts

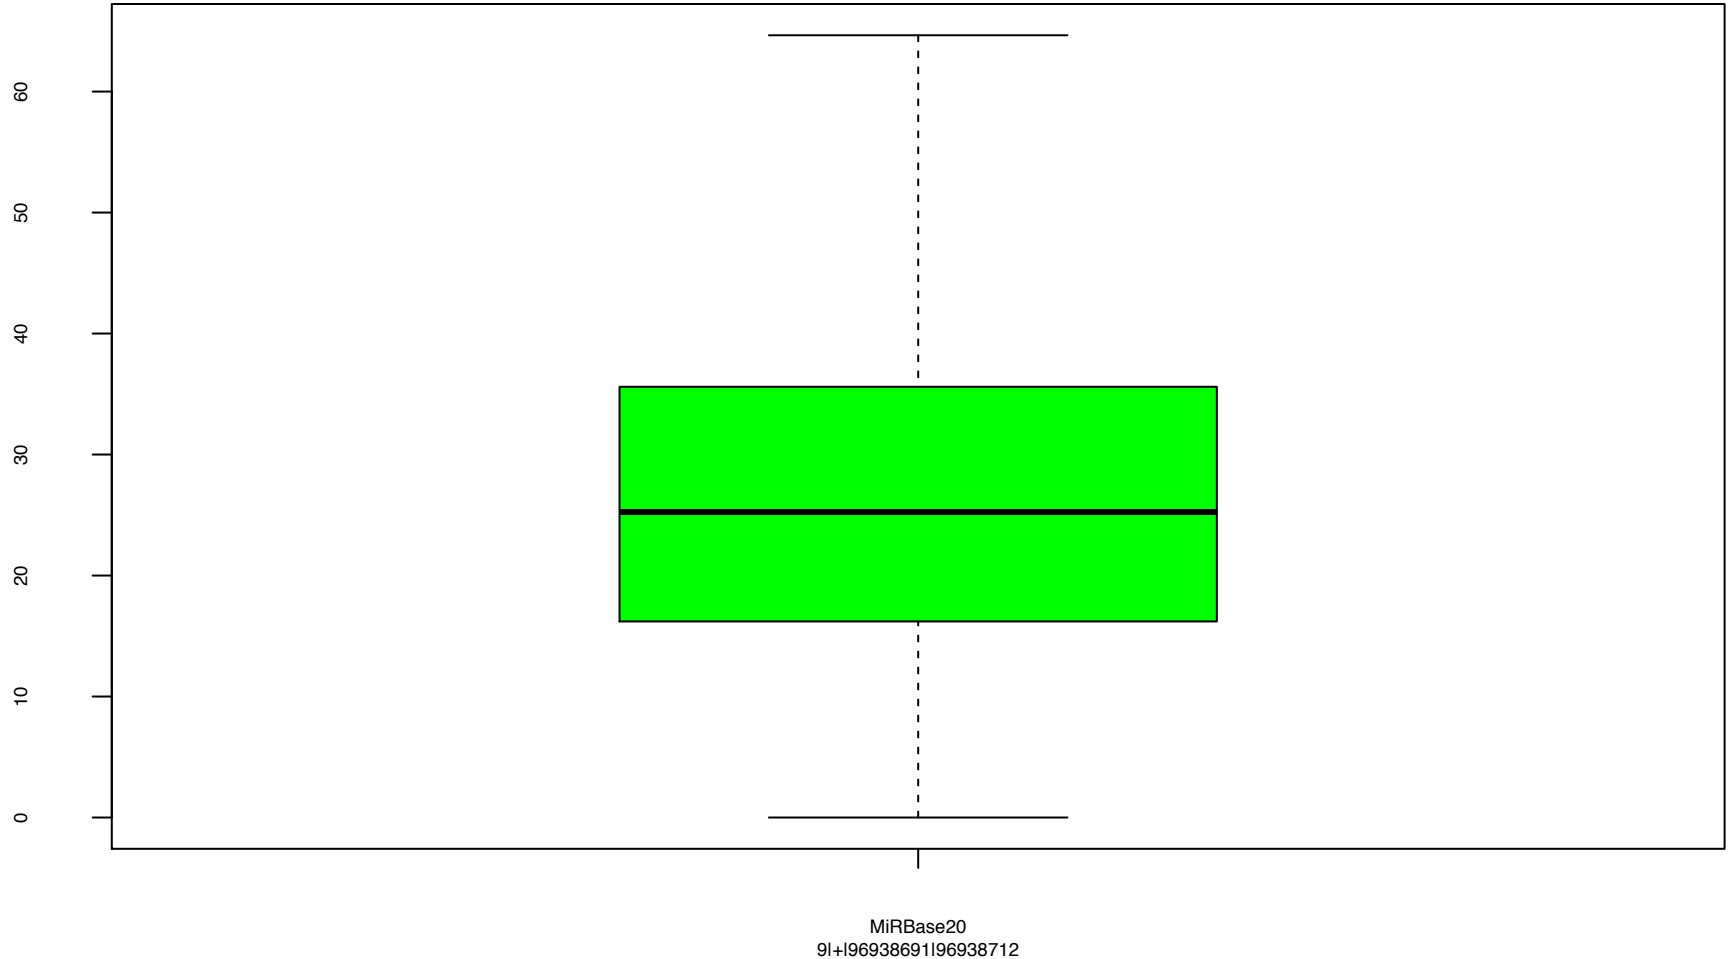

MiRBase20  
9l+l96938691196938712

isomiRs

# MIMAT0004607=hsa-miR-138-1-3p=MI0000476

Quantile Normalized Counts

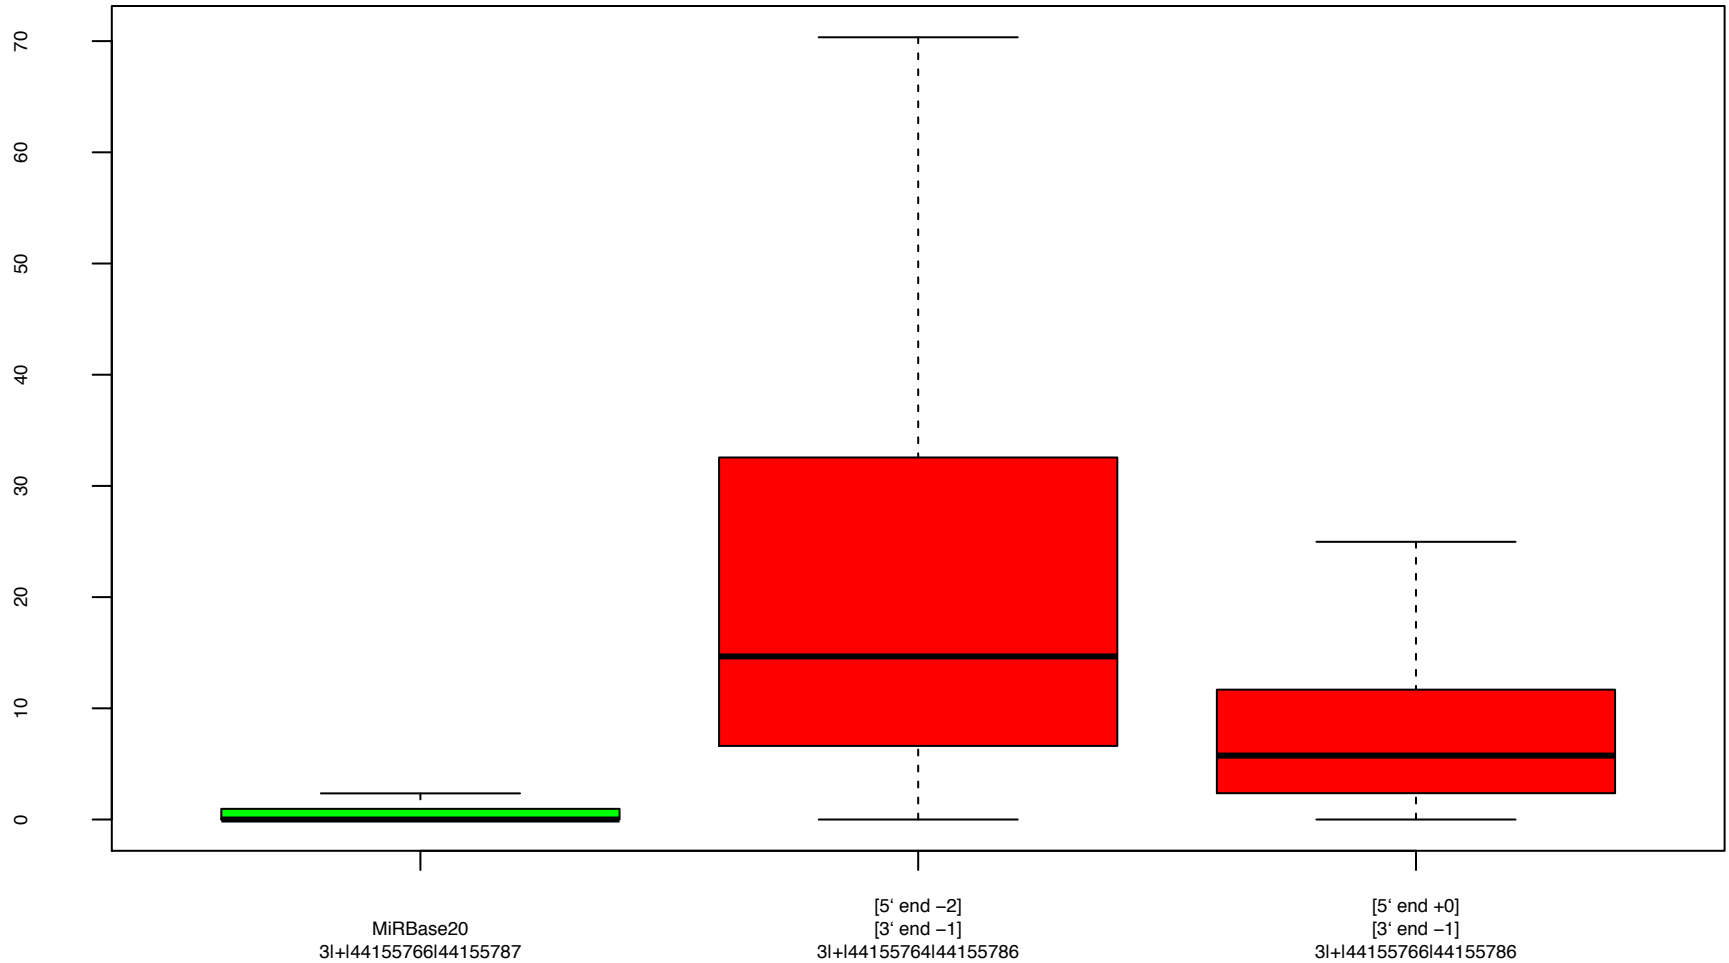

isomiRs

# MIMAT0000069\_1=hsa-miR-16-5p=MI0000115

Quantile Normalized Counts

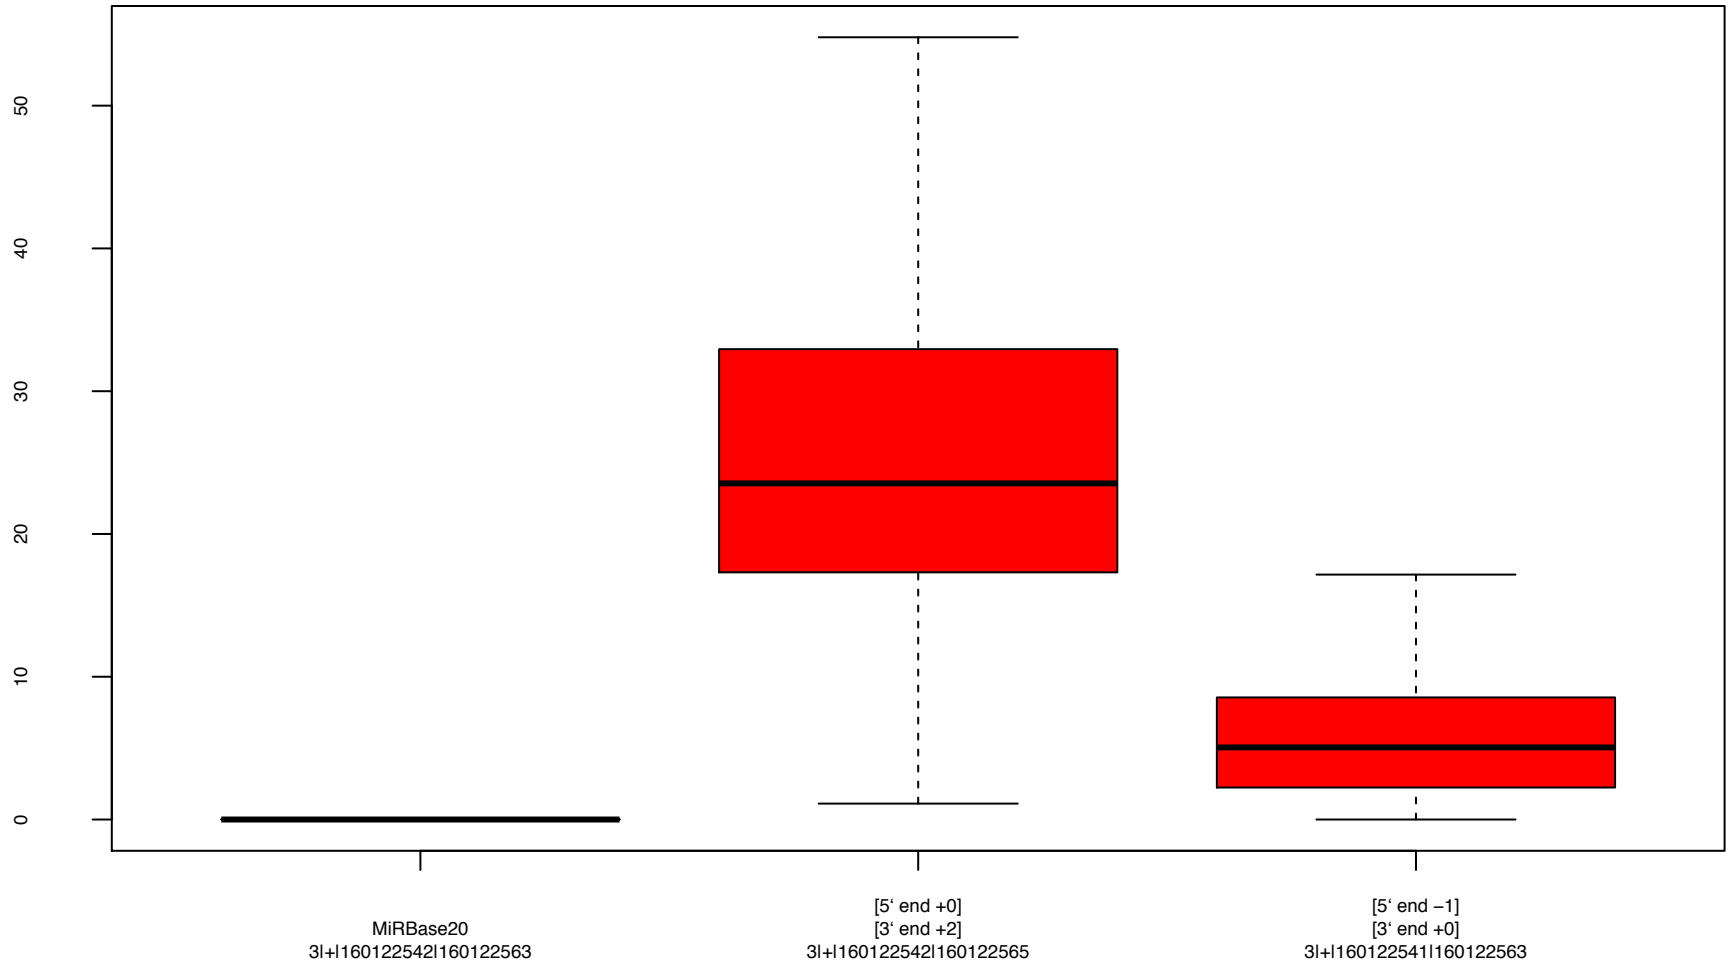

isomiRs

# MIMAT0000690=hsa-miR-296-5p=MI0000747

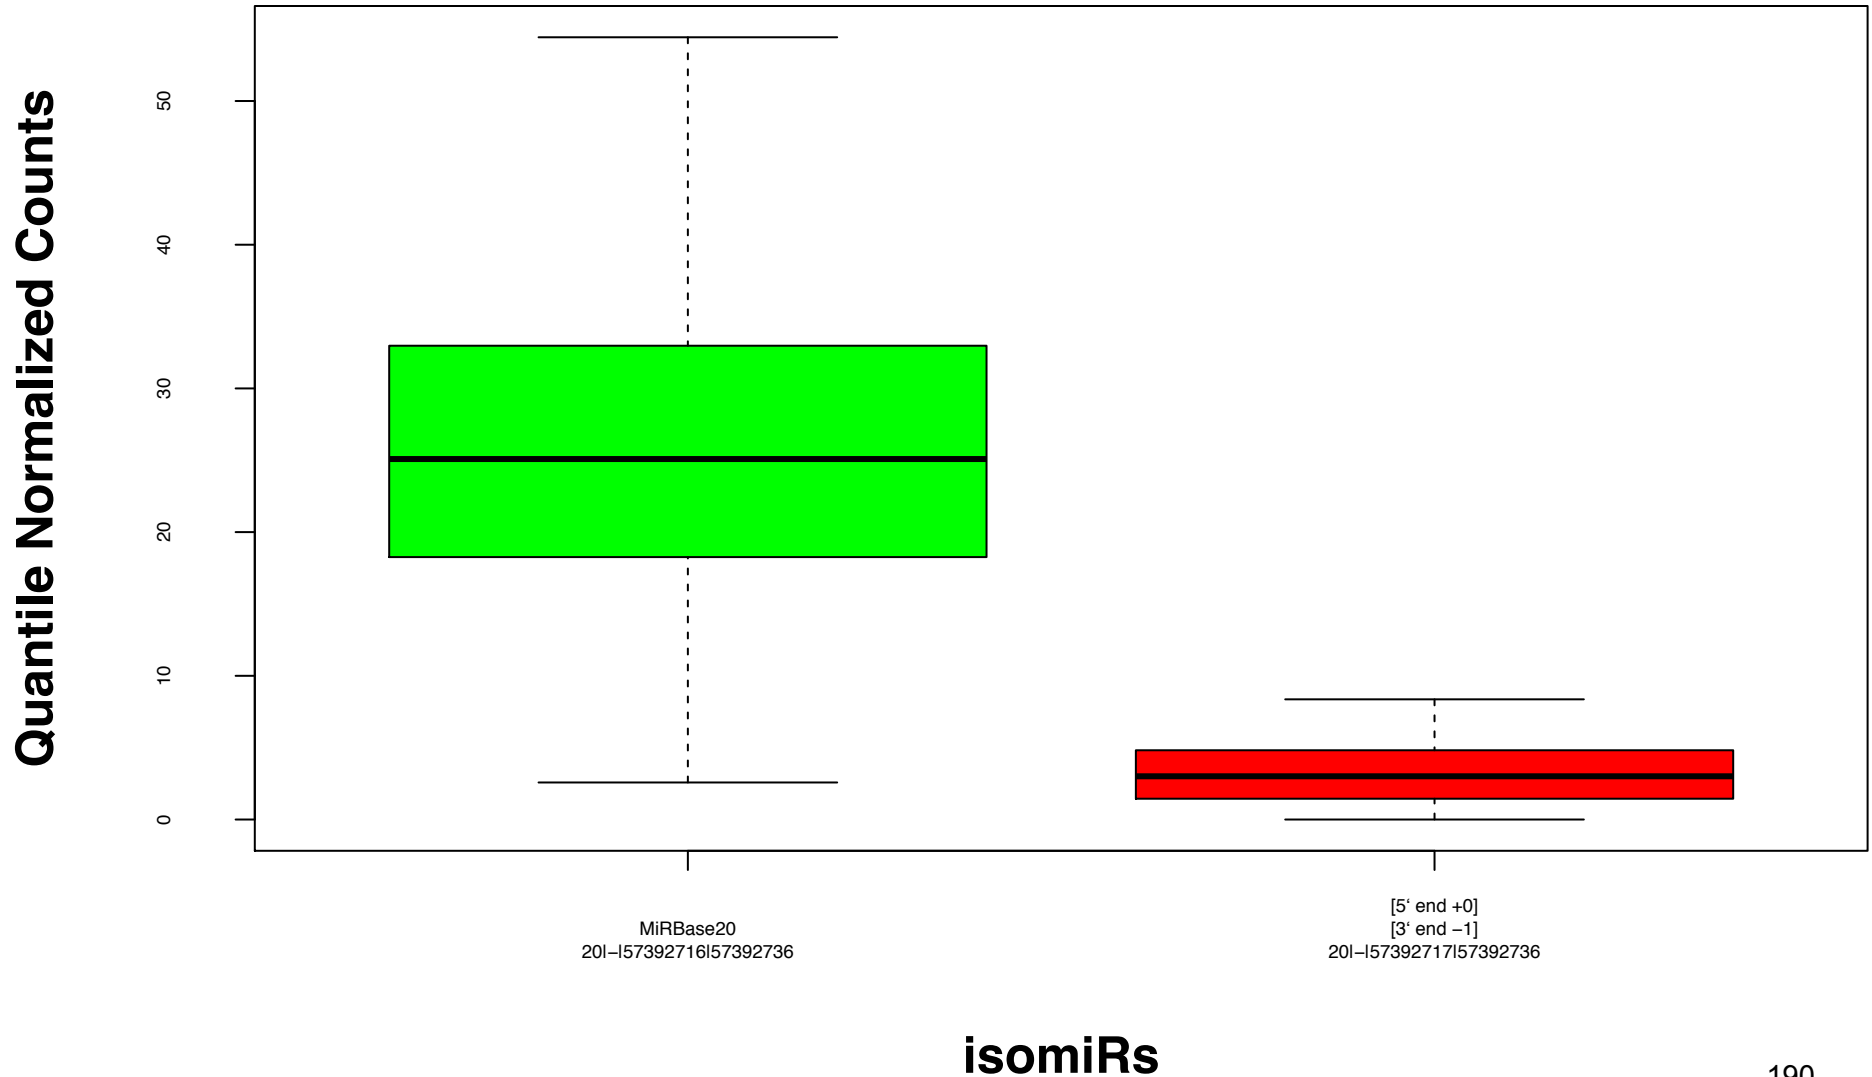

# MIMAT0019880=hsa-miR-4746-5p=MI0017385

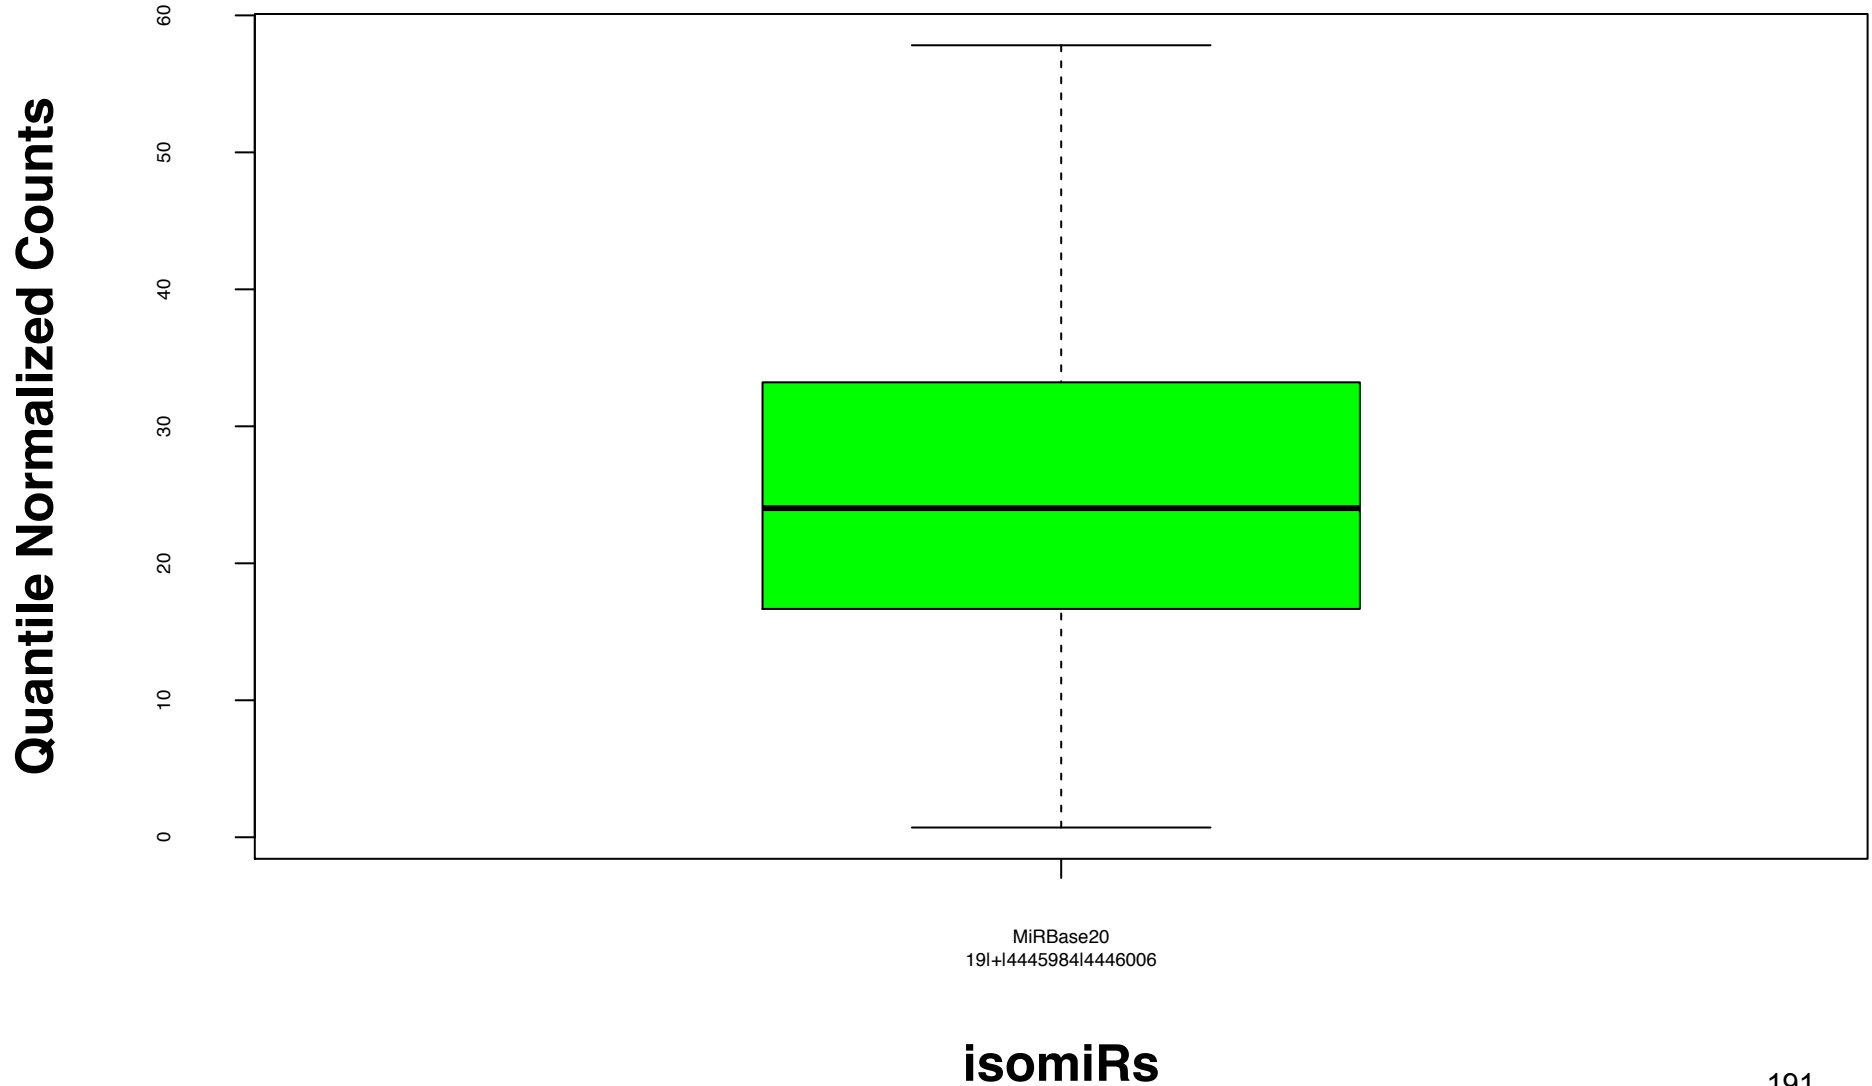



# MIMAT0004497=hsa-miR-24-2-5p=MI0000081

Quantile Normalized Counts

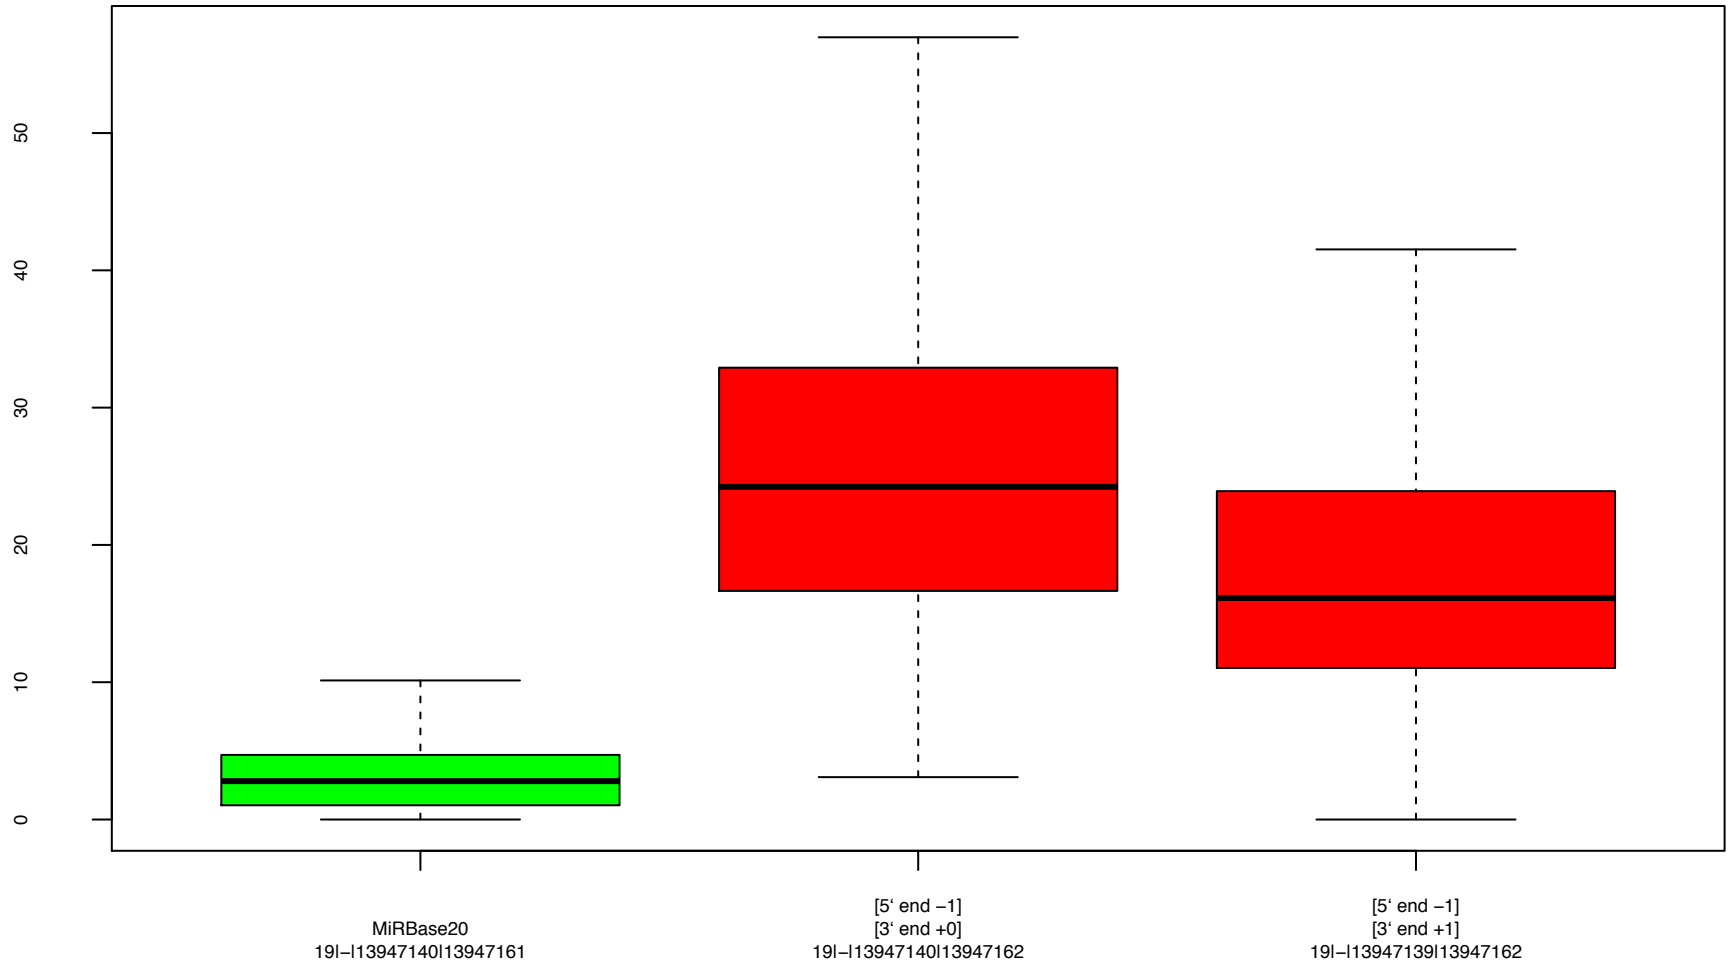

isomiRs

# MIMAT0004694=hsa-miR-342-5p=MI0000805

Quantile Normalized Counts

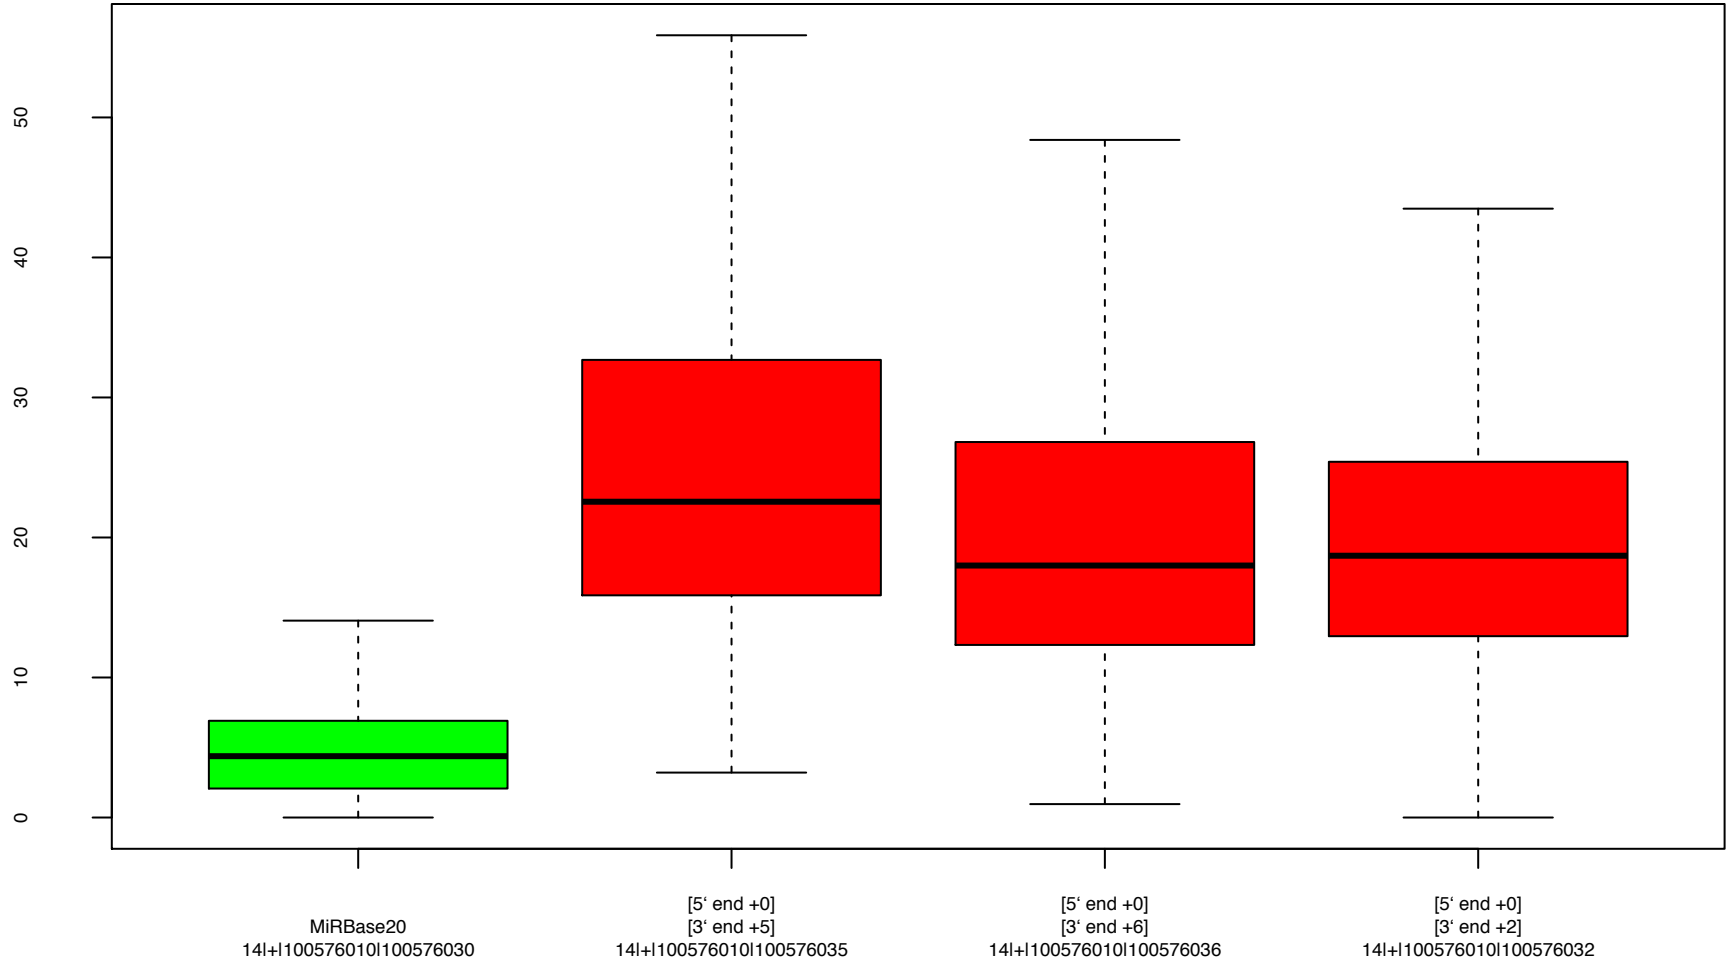

isomiRs

# MIMAT0000269=hsa-miR-212-3p=MI0000288

Quantile Normalized Counts

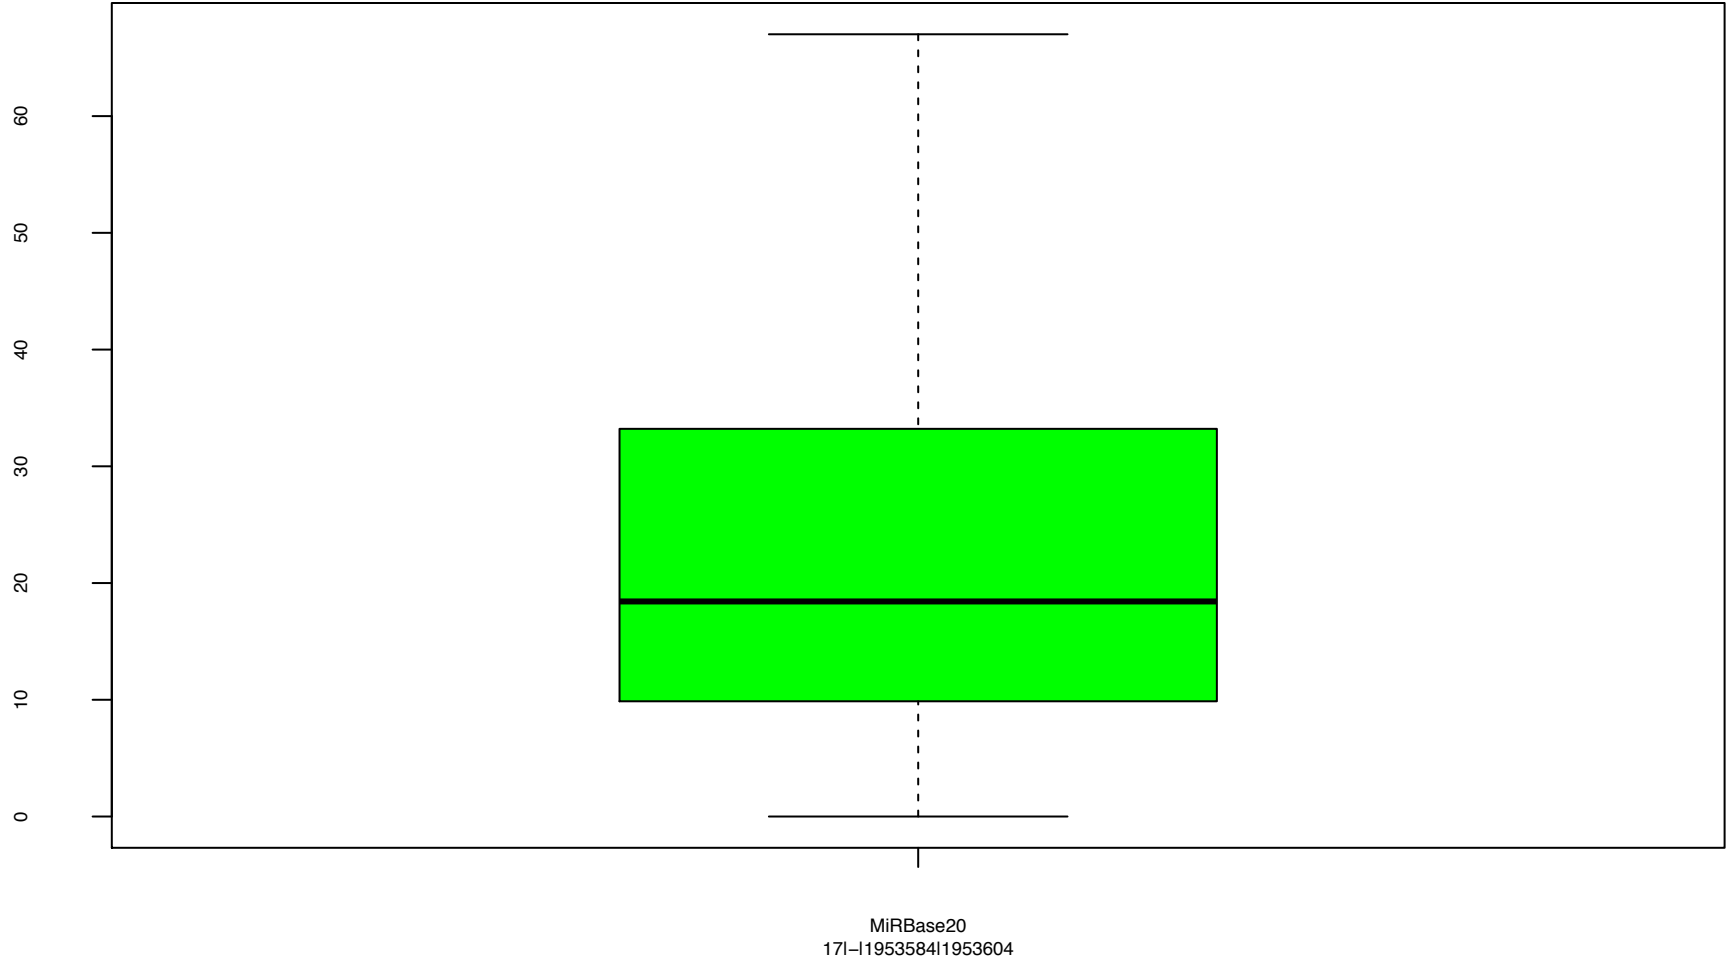

isomiRs

# CEU vs All

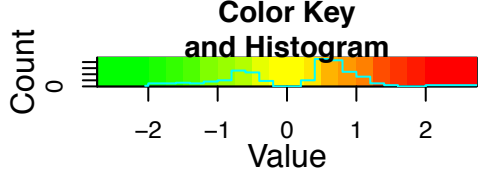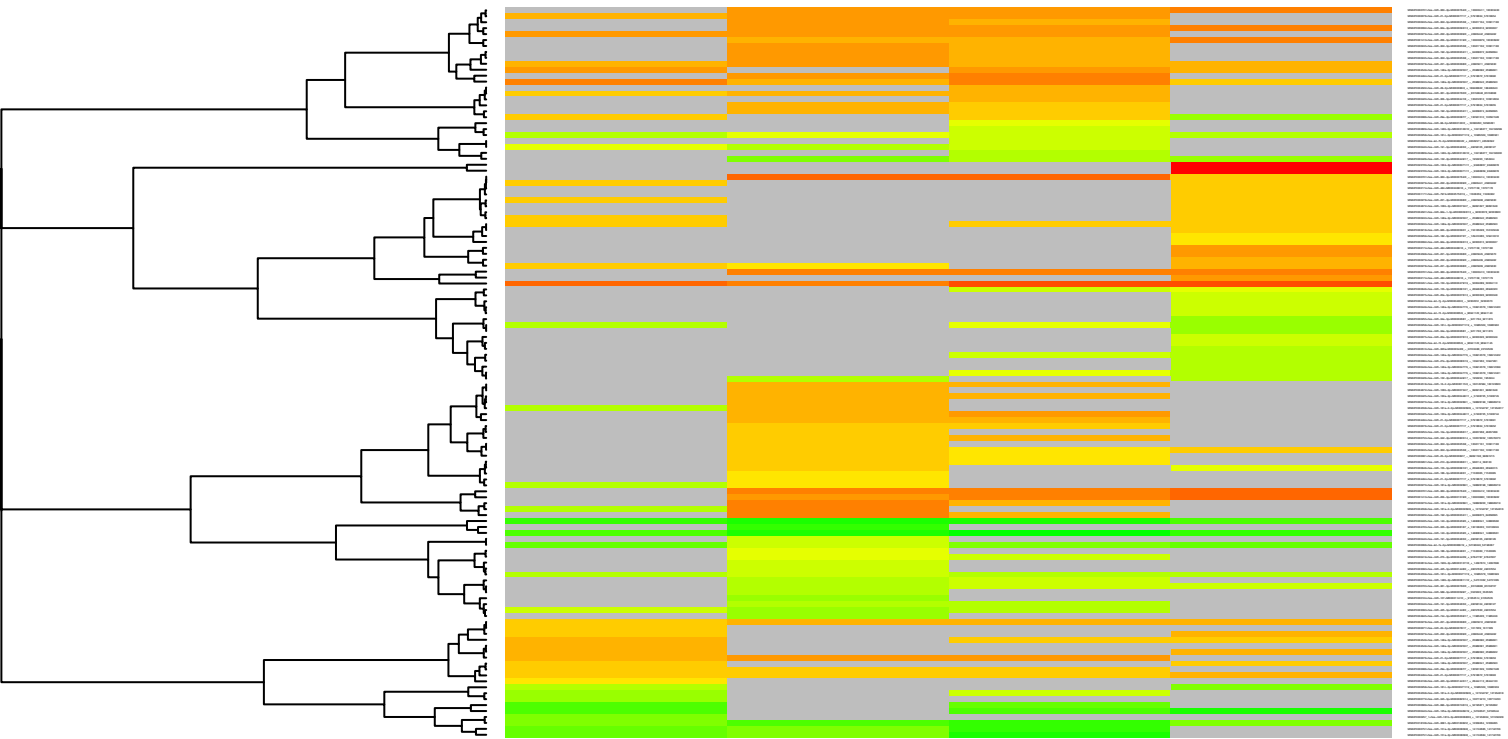

CEU\_vs\_FIN

CEU\_vs\_GBR

CEU\_vs\_TSI

CEU\_vs\_YRI

isomiR

Population Comparison

# FIN vs All

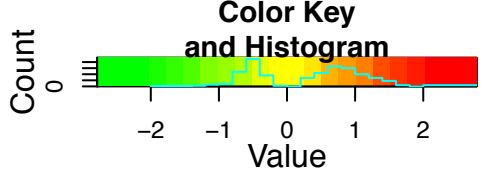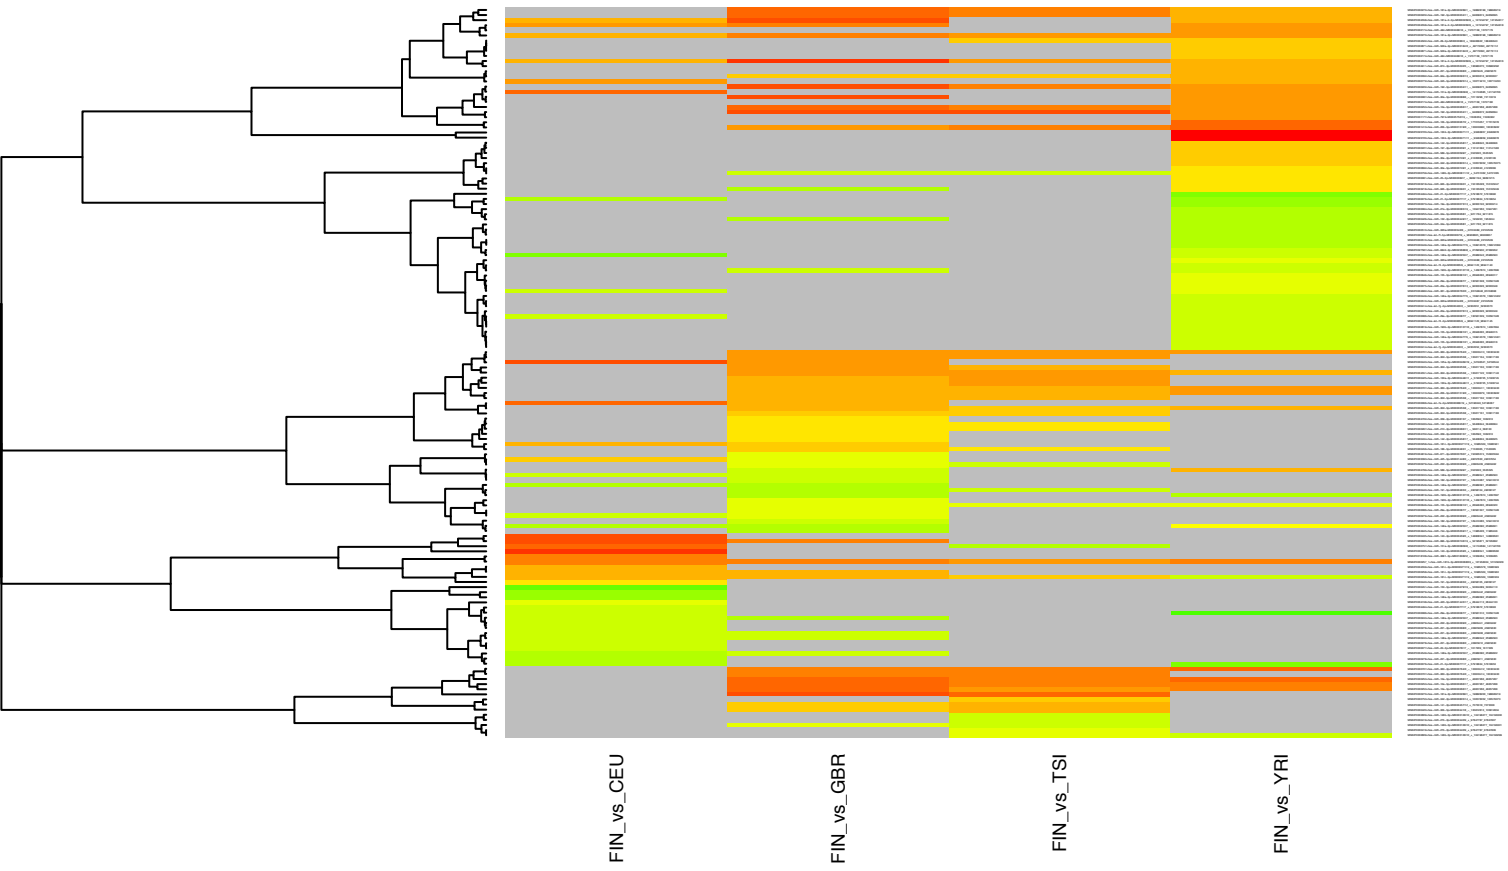

isomiR

Population Comparison

# GBR vs All

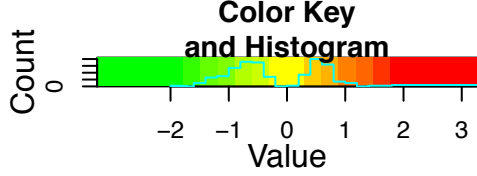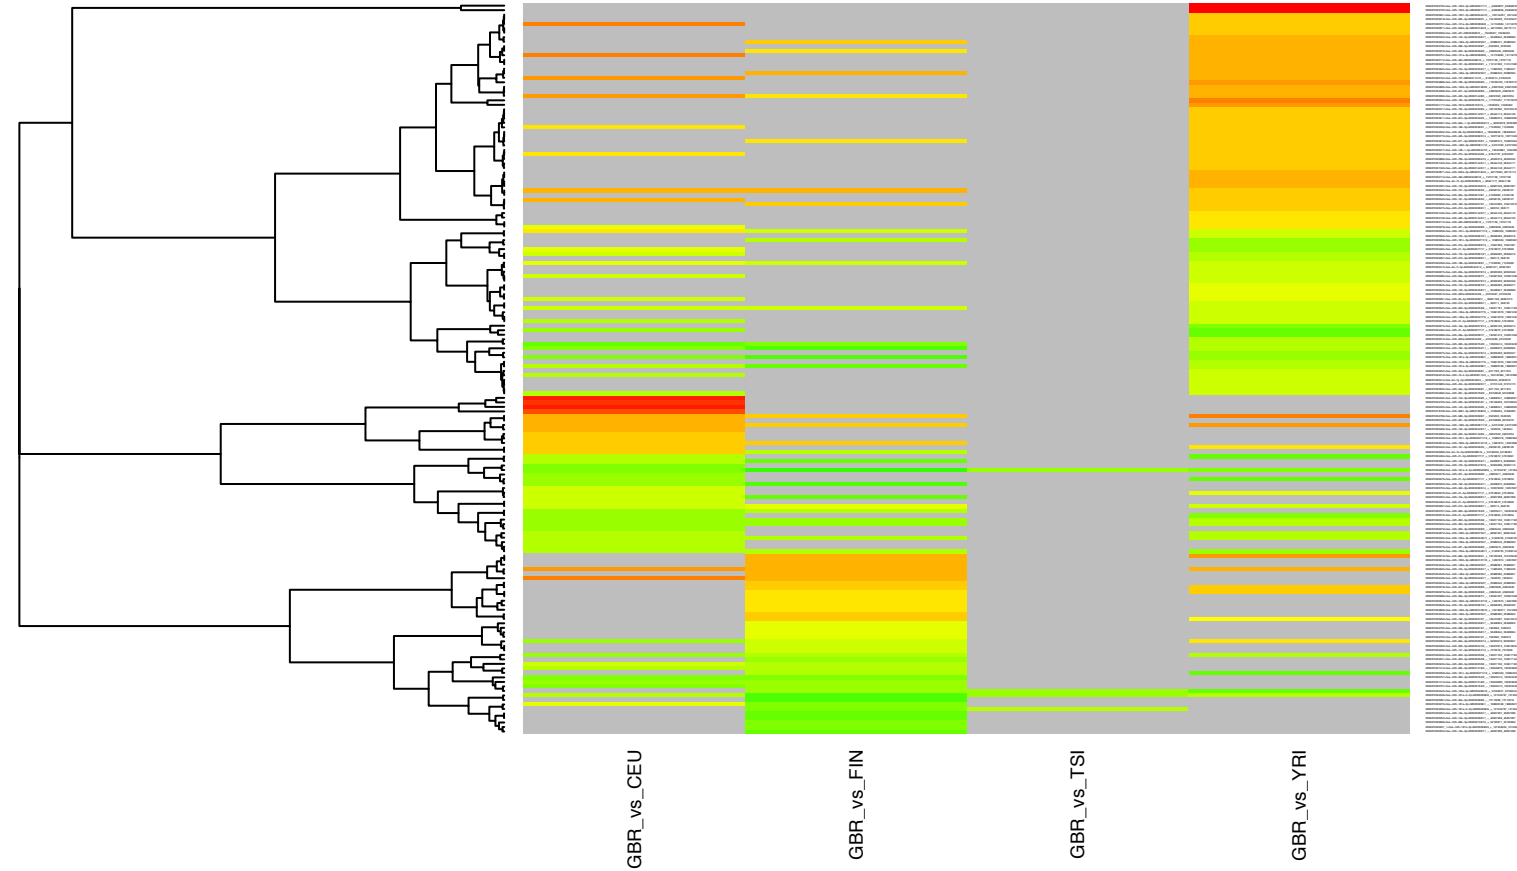

# TSI vs All

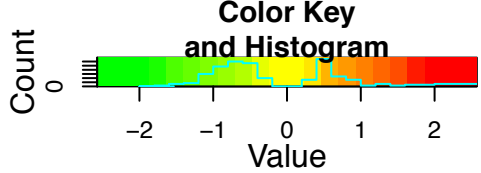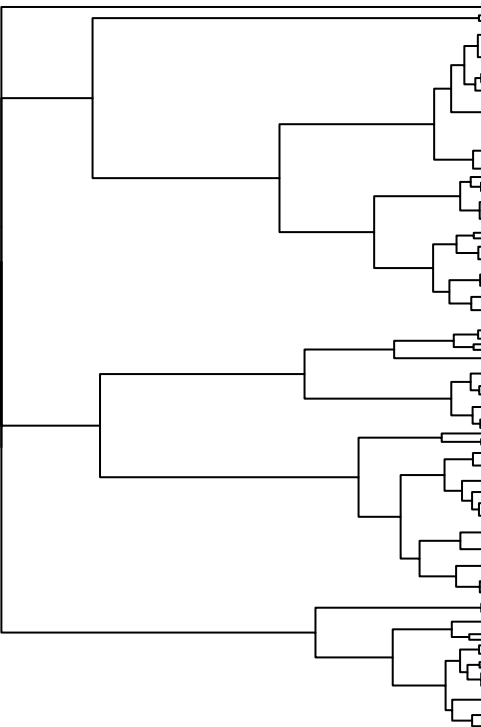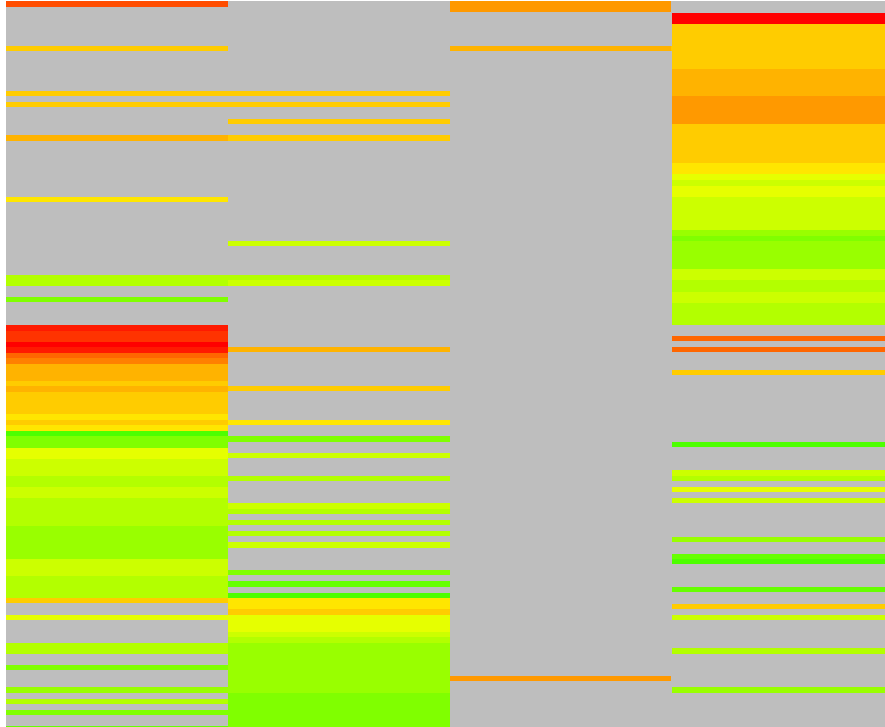

isomiR

Small text labels for individual isomiR entries, likely corresponding to the rows in the heatmap. The text is too small to read clearly but appears to be a list of identifiers.

# YRI vs All

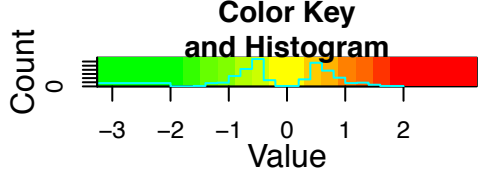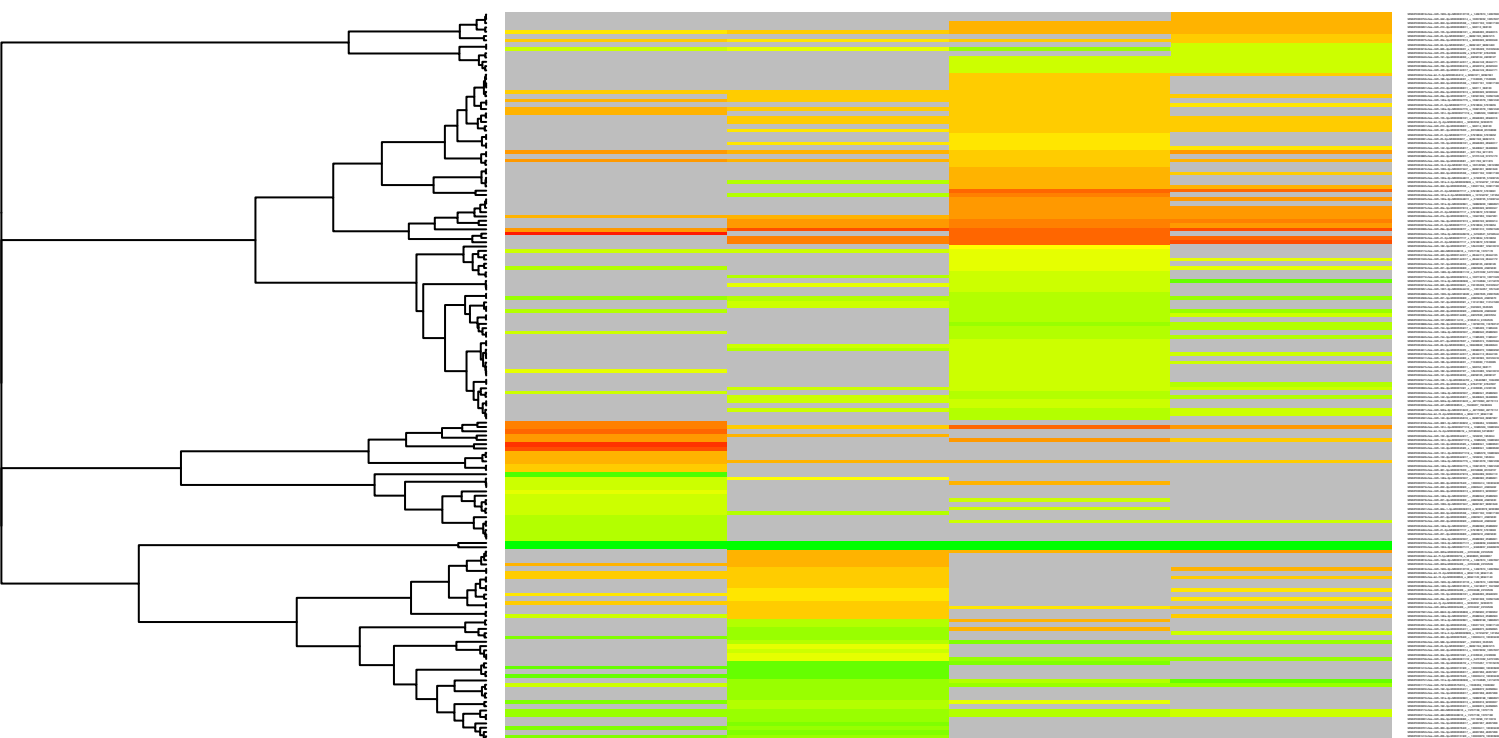

YRI\_vs\_CEU

YRI\_vs\_FIN

YRI\_vs\_GBR

YRI\_vs\_TSI

Population Comparison

isomiR



# MalesOnly: CEU vs All

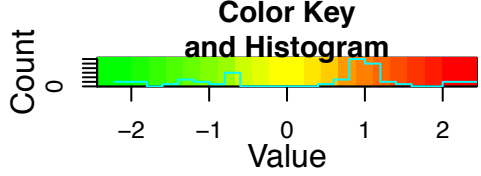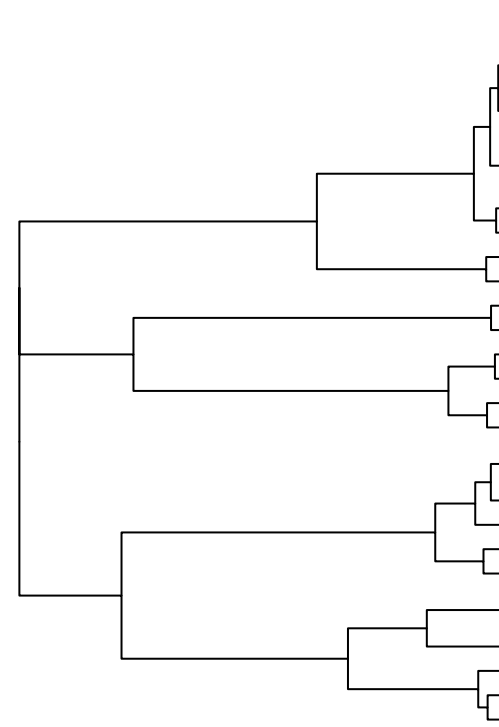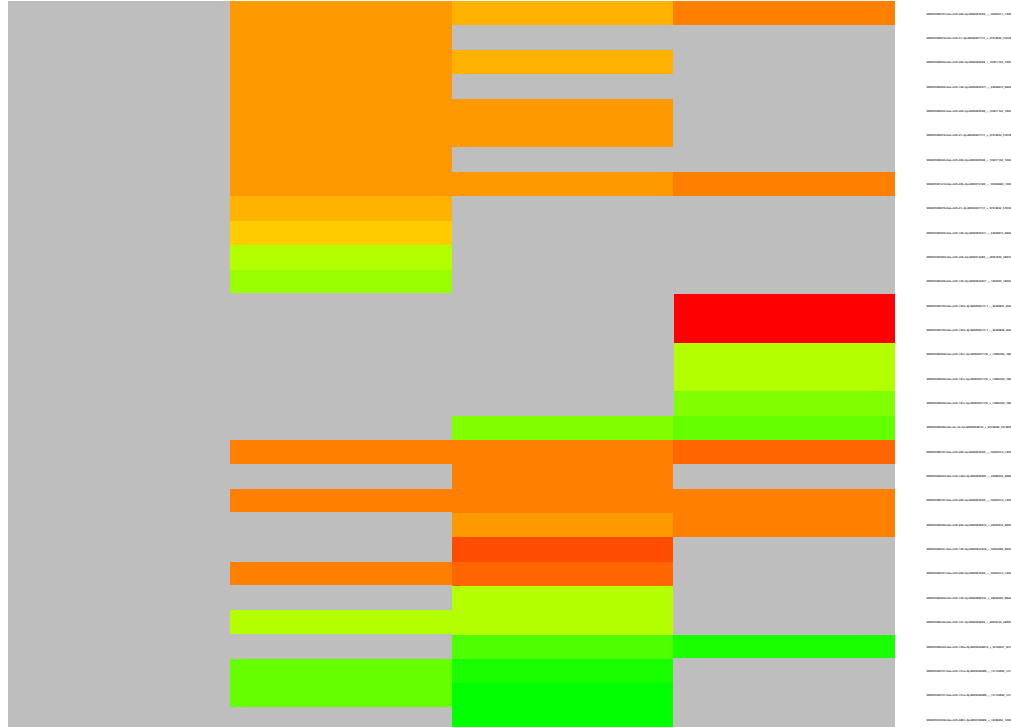

isomiR

# MalesOnly: FIN vs All

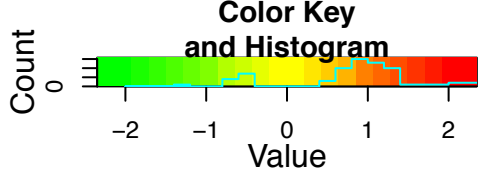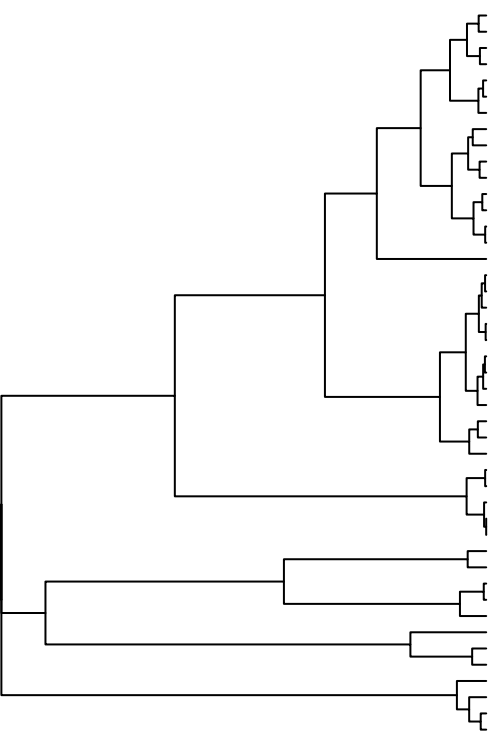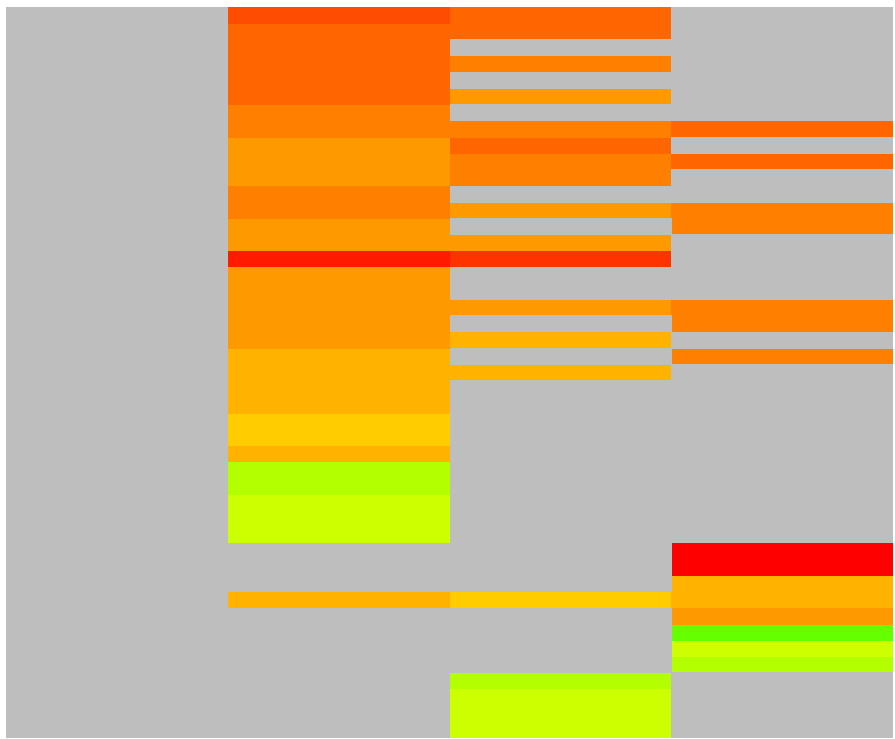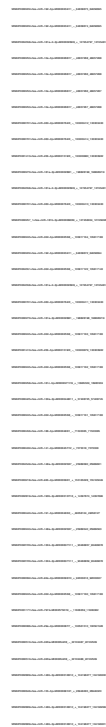

isomiR

FIN\_vs\_CEU

FIN\_vs\_GBR

FIN\_vs\_TSI

FIN\_vs\_YRI

Population Comparison

# MalesOnly: GBR vs All

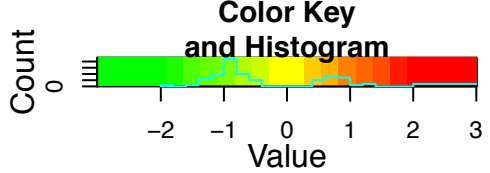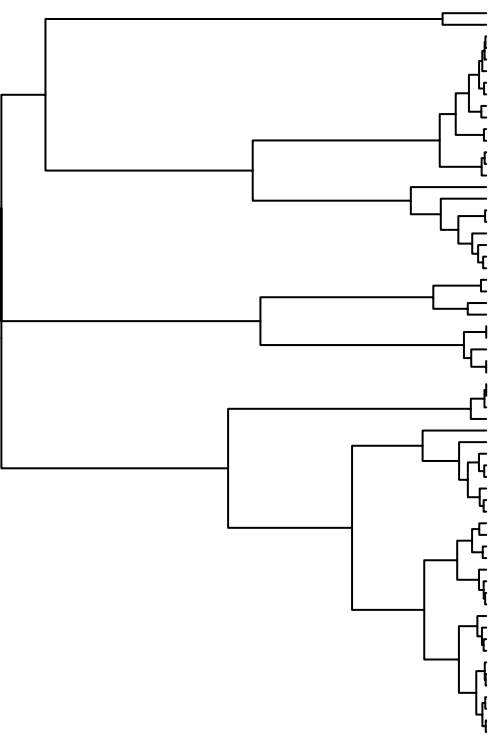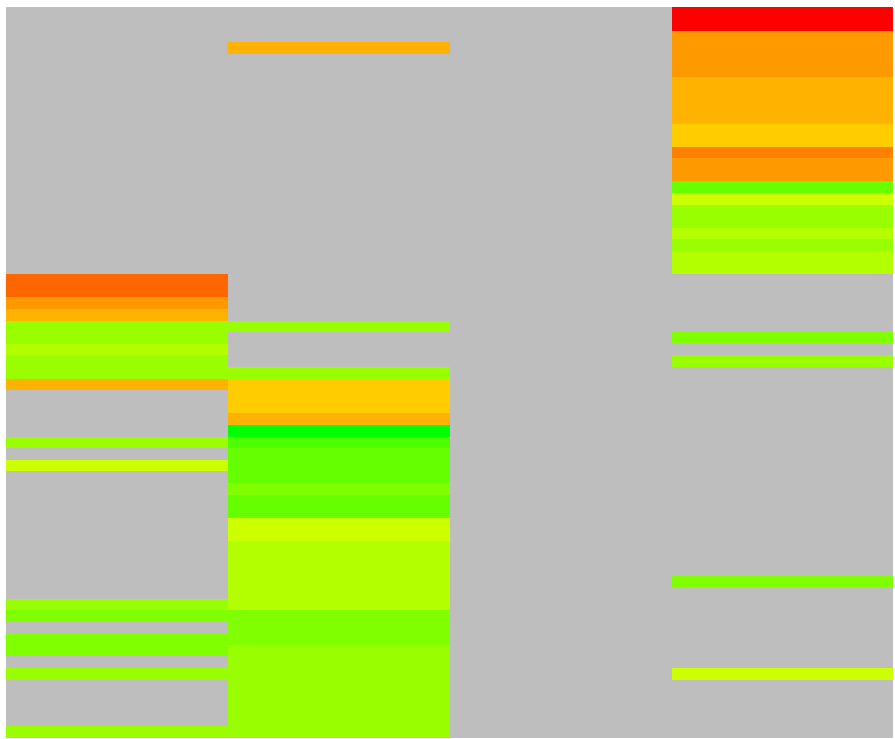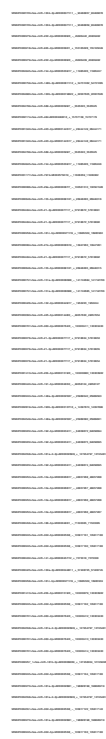

isomiR

Population Comparison

# MalesOnly: TSI vs All

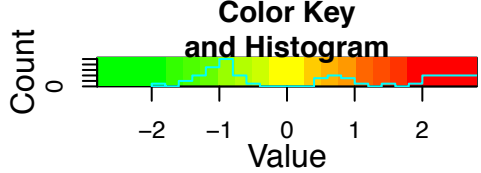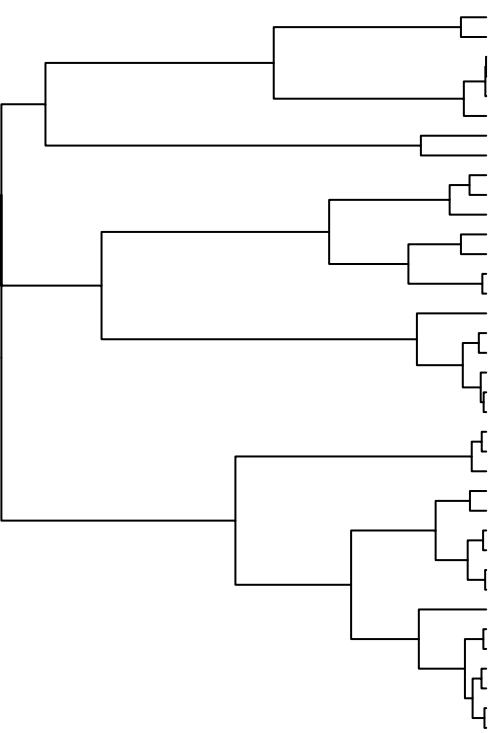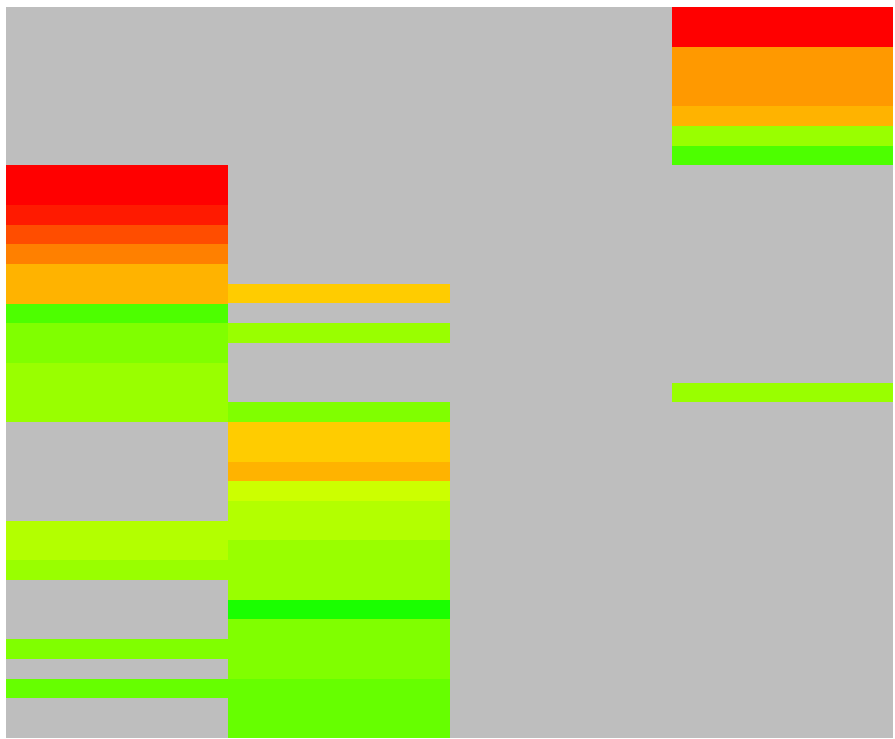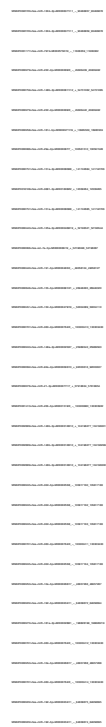

# MalesOnly: YRI vs All

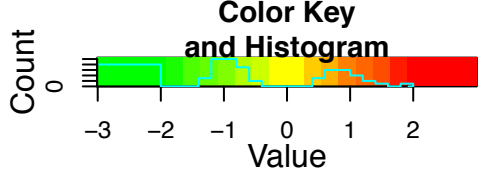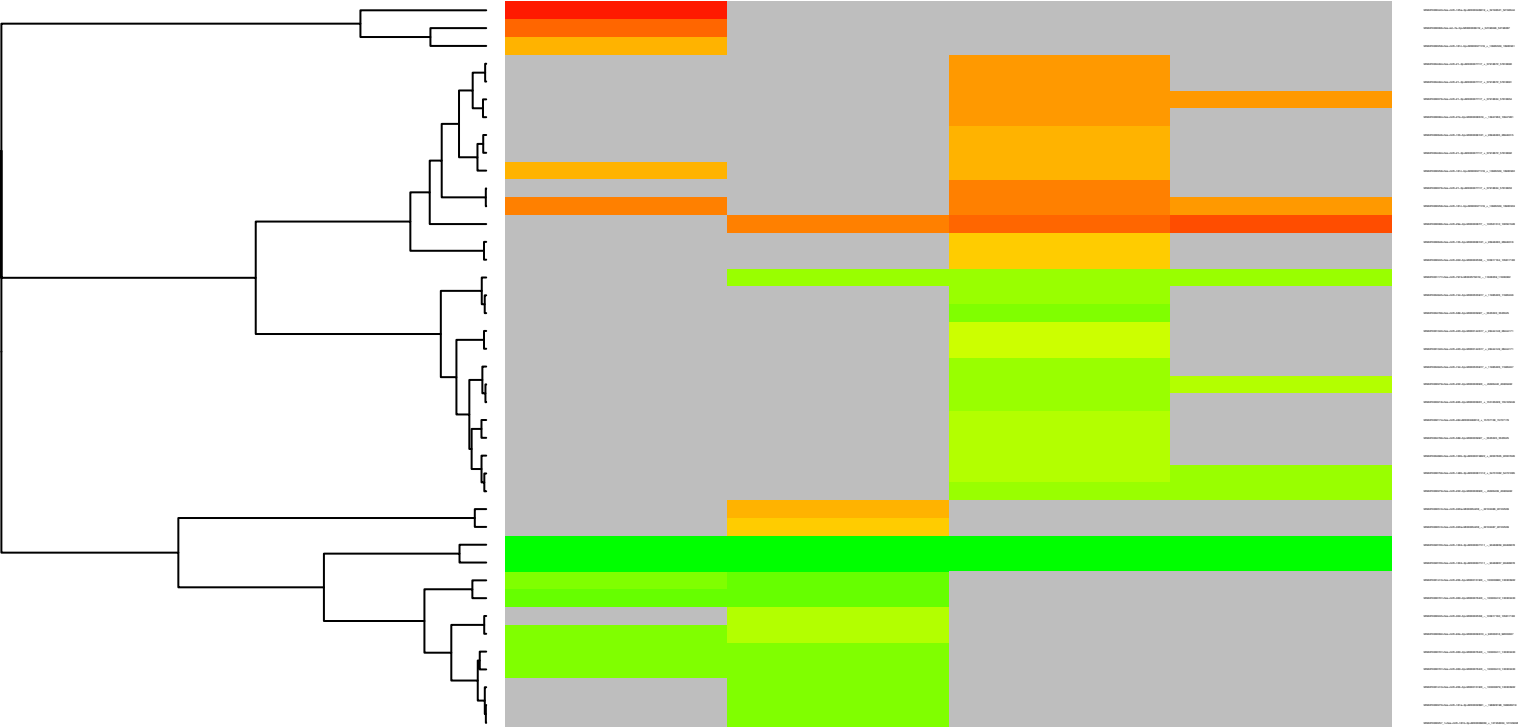

YRI\_vs\_CEU

YRI\_vs\_FIN

YRI\_vs\_GBR

YRI\_vs\_TSI

Population Comparison

isomiR

# FemalesOnly: CEU vs All

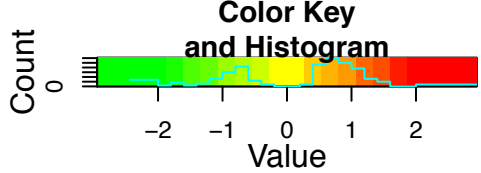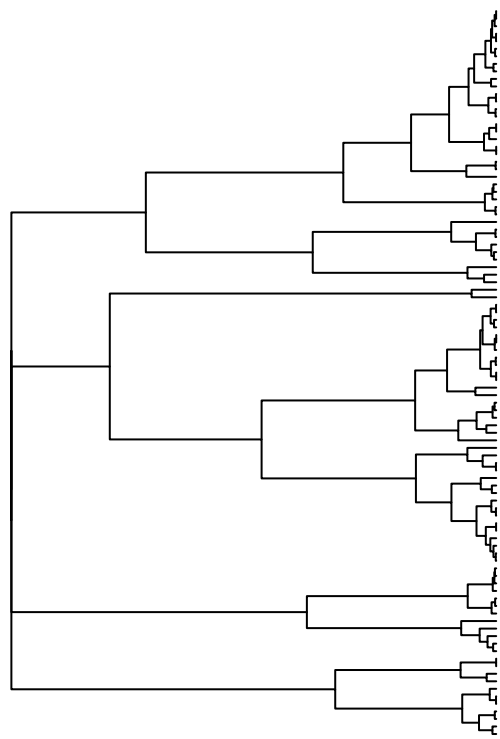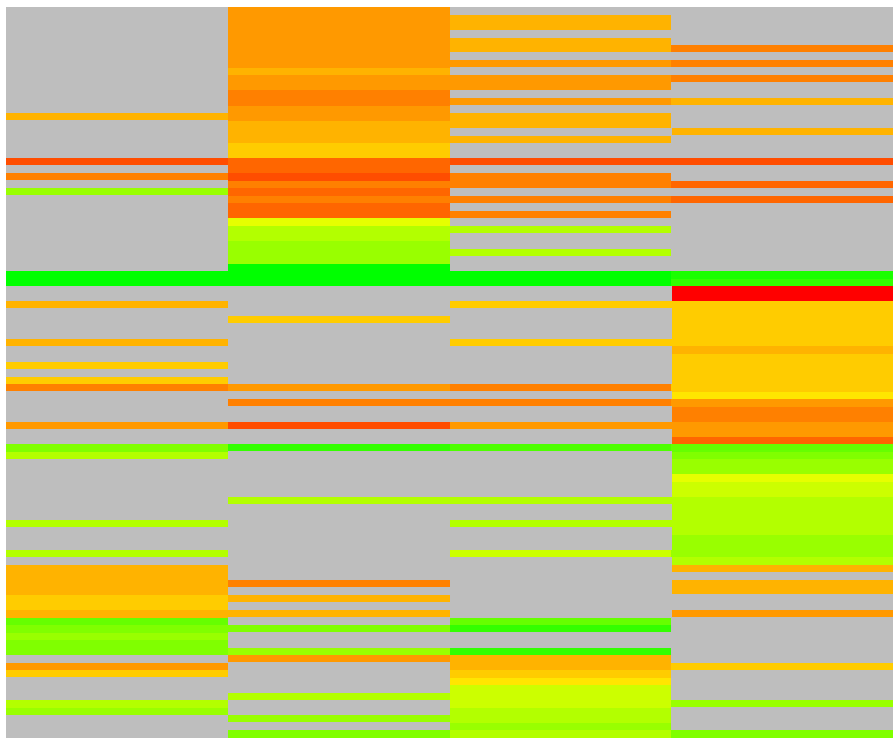

isomiR

Small text labels for individual isomiR entries, including identifiers like miR-145, miR-146, miR-147, etc.

CEU\_vs\_FIN  
CEU\_vs\_GBR  
CEU\_vs\_TSI  
CEU\_vs\_YRI

Population Comparison

# FemalesOnly: FIN vs All

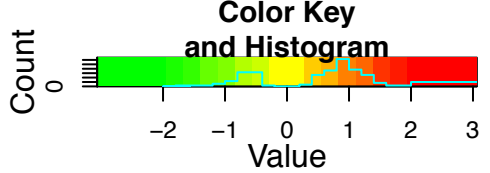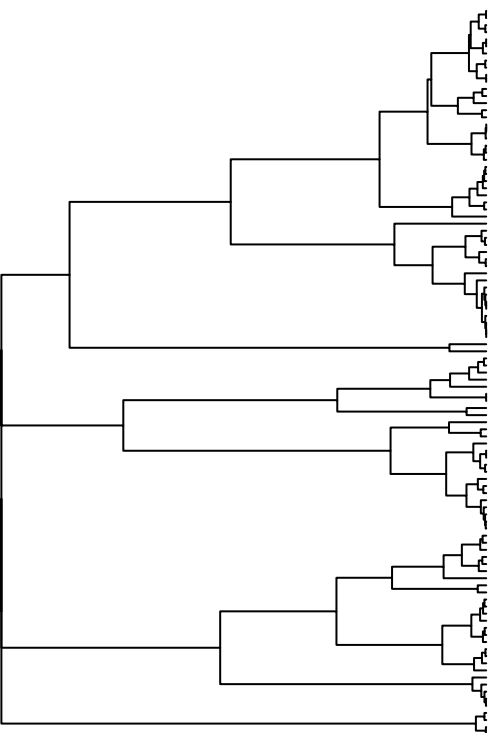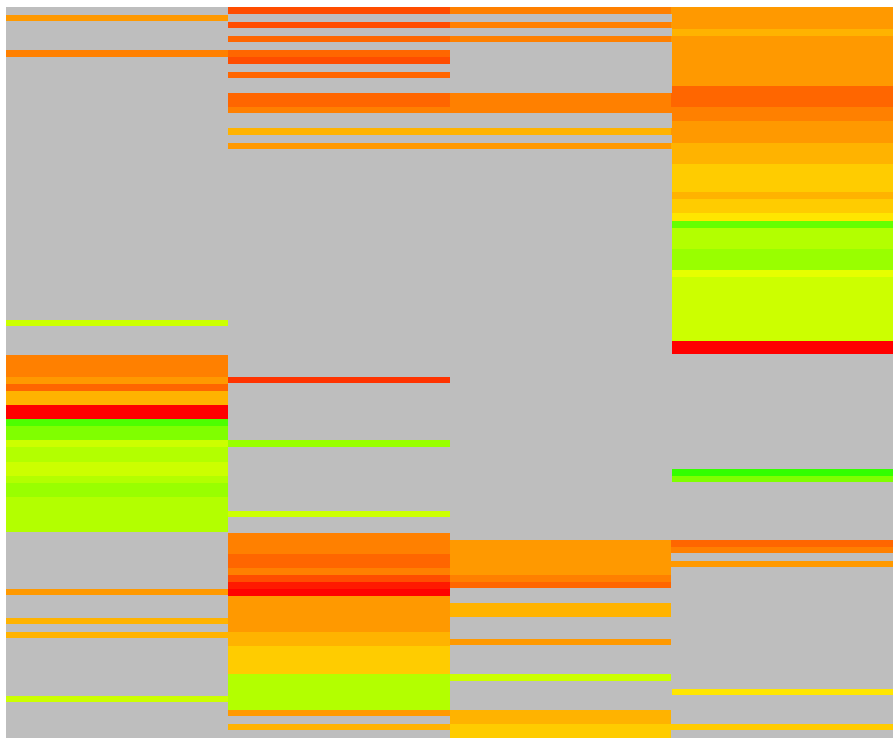

isomiR

hsa-miR-101-3p  
hsa-miR-101-5p  
hsa-miR-101-1  
hsa-miR-101-2  
hsa-miR-101-4  
hsa-miR-101-5  
hsa-miR-101-6  
hsa-miR-101-7  
hsa-miR-101-8  
hsa-miR-101-9  
hsa-miR-101-10  
hsa-miR-101-11  
hsa-miR-101-12  
hsa-miR-101-13  
hsa-miR-101-14  
hsa-miR-101-15  
hsa-miR-101-16  
hsa-miR-101-17  
hsa-miR-101-18  
hsa-miR-101-19  
hsa-miR-101-20  
hsa-miR-101-21  
hsa-miR-101-22  
hsa-miR-101-23  
hsa-miR-101-24  
hsa-miR-101-25  
hsa-miR-101-26  
hsa-miR-101-27  
hsa-miR-101-28  
hsa-miR-101-29  
hsa-miR-101-30  
hsa-miR-101-31  
hsa-miR-101-32  
hsa-miR-101-33  
hsa-miR-101-34  
hsa-miR-101-35  
hsa-miR-101-36  
hsa-miR-101-37  
hsa-miR-101-38  
hsa-miR-101-39  
hsa-miR-101-40  
hsa-miR-101-41  
hsa-miR-101-42  
hsa-miR-101-43  
hsa-miR-101-44  
hsa-miR-101-45  
hsa-miR-101-46  
hsa-miR-101-47  
hsa-miR-101-48  
hsa-miR-101-49  
hsa-miR-101-50  
hsa-miR-101-51  
hsa-miR-101-52  
hsa-miR-101-53  
hsa-miR-101-54  
hsa-miR-101-55  
hsa-miR-101-56  
hsa-miR-101-57  
hsa-miR-101-58  
hsa-miR-101-59  
hsa-miR-101-60  
hsa-miR-101-61  
hsa-miR-101-62  
hsa-miR-101-63  
hsa-miR-101-64  
hsa-miR-101-65  
hsa-miR-101-66  
hsa-miR-101-67  
hsa-miR-101-68  
hsa-miR-101-69  
hsa-miR-101-70  
hsa-miR-101-71  
hsa-miR-101-72  
hsa-miR-101-73  
hsa-miR-101-74  
hsa-miR-101-75  
hsa-miR-101-76  
hsa-miR-101-77  
hsa-miR-101-78  
hsa-miR-101-79  
hsa-miR-101-80  
hsa-miR-101-81  
hsa-miR-101-82  
hsa-miR-101-83  
hsa-miR-101-84  
hsa-miR-101-85  
hsa-miR-101-86  
hsa-miR-101-87  
hsa-miR-101-88  
hsa-miR-101-89  
hsa-miR-101-90  
hsa-miR-101-91  
hsa-miR-101-92  
hsa-miR-101-93  
hsa-miR-101-94  
hsa-miR-101-95  
hsa-miR-101-96  
hsa-miR-101-97  
hsa-miR-101-98  
hsa-miR-101-99  
hsa-miR-101-100

# FemalesOnly: GBR vs All

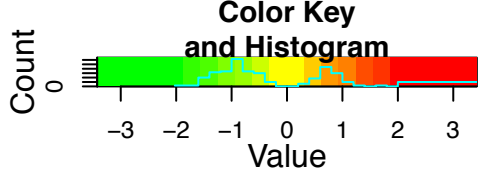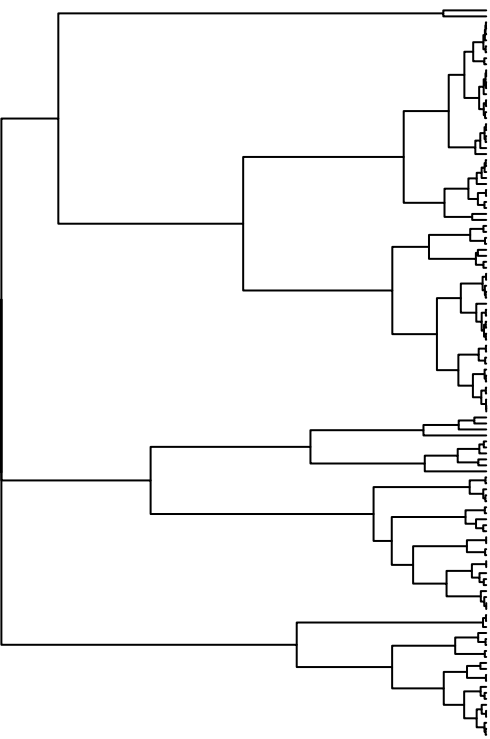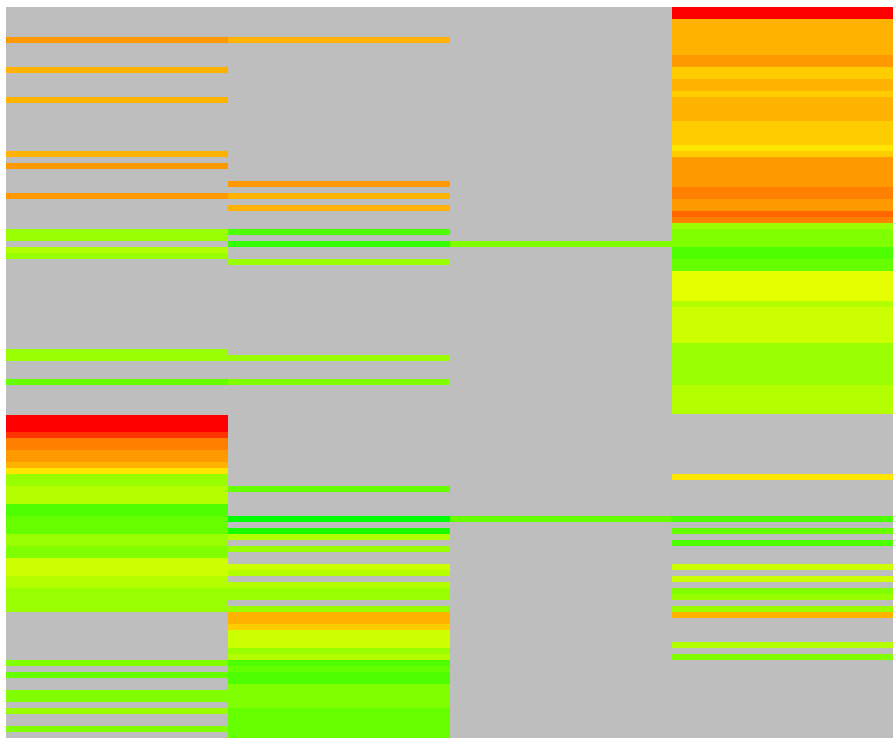

isomiR

Small text labels for individual isomiRs, including names like hsa-miR-101-3, hsa-miR-101-5, hsa-miR-101-1, etc.

isomiR

GBR\_vs\_CEU

GBR\_vs\_FIN

GBR\_vs\_TSI

GBR\_vs\_YRI

Population Comparison



# FemalesOnly: TSI vs All

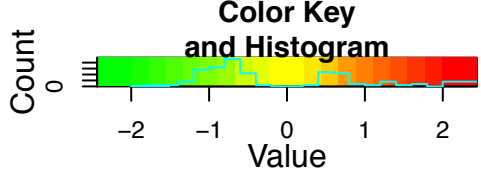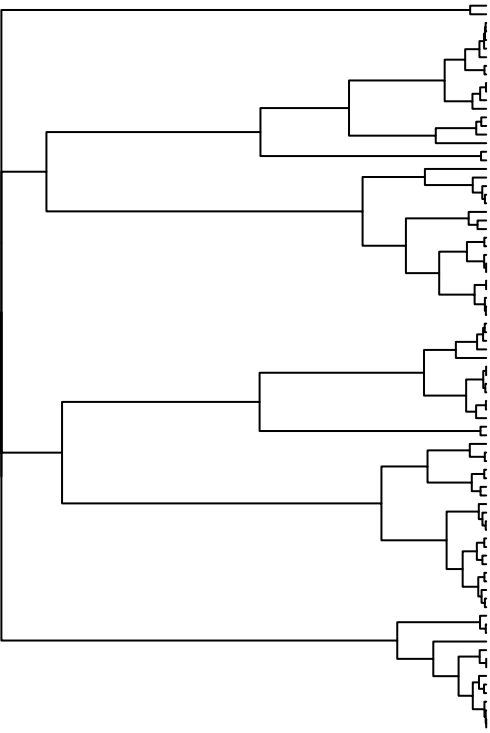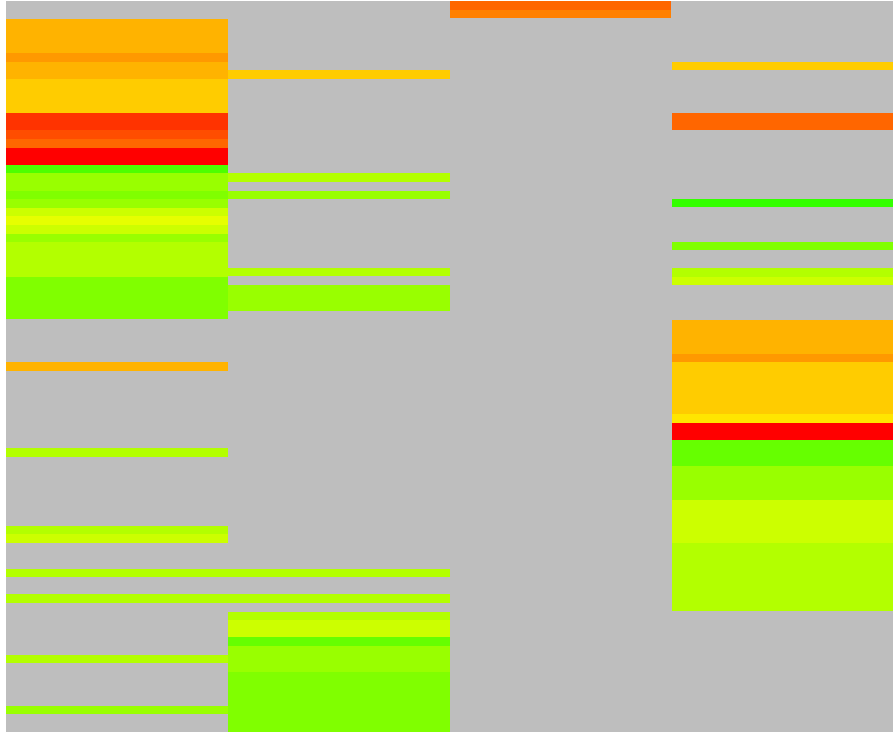

isomiR

Small text labels for individual samples, likely miRNA identifiers, listed vertically on the right side of the heatmap.

# FemalesOnly: YRI vs All

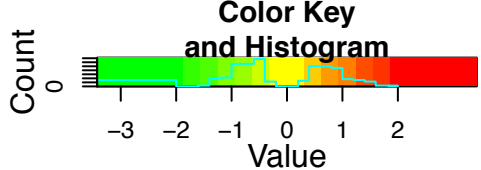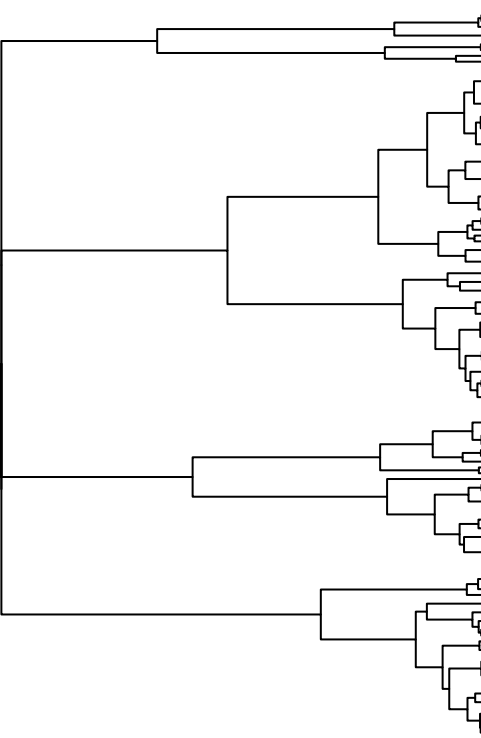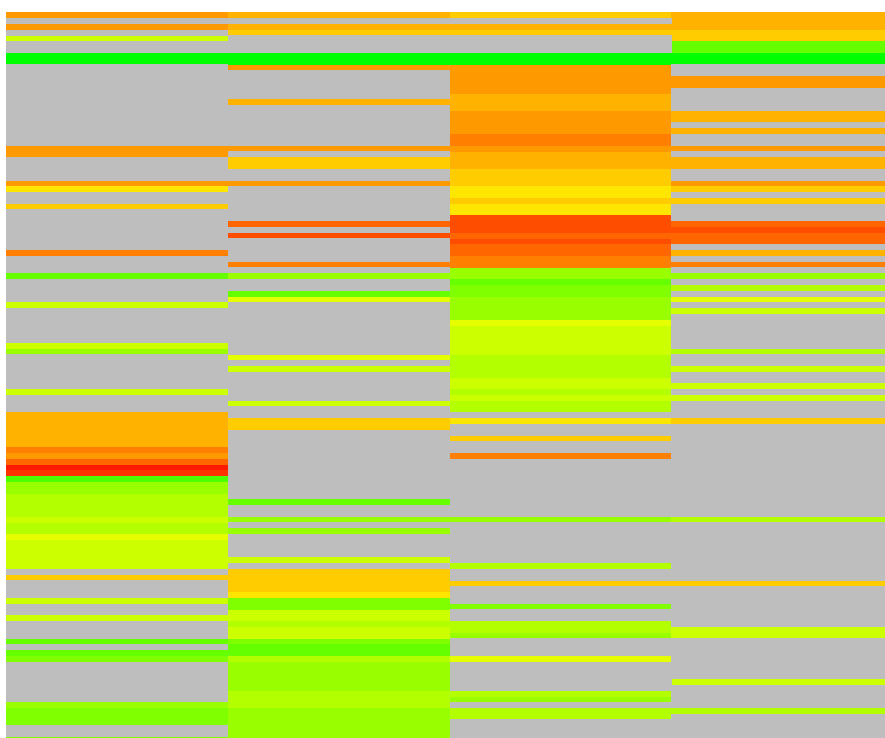

isomiR

hsa-miR-145-3-3p  
hsa-miR-145-3-2p  
hsa-miR-145-3-1p  
hsa-miR-145-3-4p  
hsa-miR-145-3-5p  
hsa-miR-145-3-6p  
hsa-miR-145-3-7p  
hsa-miR-145-3-8p  
hsa-miR-145-3-9p  
hsa-miR-145-3-10p  
hsa-miR-145-3-11p  
hsa-miR-145-3-12p  
hsa-miR-145-3-13p  
hsa-miR-145-3-14p  
hsa-miR-145-3-15p  
hsa-miR-145-3-16p  
hsa-miR-145-3-17p  
hsa-miR-145-3-18p  
hsa-miR-145-3-19p  
hsa-miR-145-3-20p  
hsa-miR-145-3-21p  
hsa-miR-145-3-22p  
hsa-miR-145-3-23p  
hsa-miR-145-3-24p  
hsa-miR-145-3-25p  
hsa-miR-145-3-26p  
hsa-miR-145-3-27p  
hsa-miR-145-3-28p  
hsa-miR-145-3-29p  
hsa-miR-145-3-30p  
hsa-miR-145-3-31p  
hsa-miR-145-3-32p  
hsa-miR-145-3-33p  
hsa-miR-145-3-34p  
hsa-miR-145-3-35p  
hsa-miR-145-3-36p  
hsa-miR-145-3-37p  
hsa-miR-145-3-38p  
hsa-miR-145-3-39p  
hsa-miR-145-3-40p  
hsa-miR-145-3-41p  
hsa-miR-145-3-42p  
hsa-miR-145-3-43p  
hsa-miR-145-3-44p  
hsa-miR-145-3-45p  
hsa-miR-145-3-46p  
hsa-miR-145-3-47p  
hsa-miR-145-3-48p  
hsa-miR-145-3-49p  
hsa-miR-145-3-50p  
hsa-miR-145-3-51p  
hsa-miR-145-3-52p  
hsa-miR-145-3-53p  
hsa-miR-145-3-54p  
hsa-miR-145-3-55p  
hsa-miR-145-3-56p  
hsa-miR-145-3-57p  
hsa-miR-145-3-58p  
hsa-miR-145-3-59p  
hsa-miR-145-3-60p  
hsa-miR-145-3-61p  
hsa-miR-145-3-62p  
hsa-miR-145-3-63p  
hsa-miR-145-3-64p  
hsa-miR-145-3-65p  
hsa-miR-145-3-66p  
hsa-miR-145-3-67p  
hsa-miR-145-3-68p  
hsa-miR-145-3-69p  
hsa-miR-145-3-70p  
hsa-miR-145-3-71p  
hsa-miR-145-3-72p  
hsa-miR-145-3-73p  
hsa-miR-145-3-74p  
hsa-miR-145-3-75p  
hsa-miR-145-3-76p  
hsa-miR-145-3-77p  
hsa-miR-145-3-78p  
hsa-miR-145-3-79p  
hsa-miR-145-3-80p  
hsa-miR-145-3-81p  
hsa-miR-145-3-82p  
hsa-miR-145-3-83p  
hsa-miR-145-3-84p  
hsa-miR-145-3-85p  
hsa-miR-145-3-86p  
hsa-miR-145-3-87p  
hsa-miR-145-3-88p  
hsa-miR-145-3-89p  
hsa-miR-145-3-90p  
hsa-miR-145-3-91p  
hsa-miR-145-3-92p  
hsa-miR-145-3-93p  
hsa-miR-145-3-94p  
hsa-miR-145-3-95p  
hsa-miR-145-3-96p  
hsa-miR-145-3-97p  
hsa-miR-145-3-98p  
hsa-miR-145-3-99p  
hsa-miR-145-3-100p  
hsa-miR-145-3-101p  
hsa-miR-145-3-102p  
hsa-miR-145-3-103p  
hsa-miR-145-3-104p  
hsa-miR-145-3-105p  
hsa-miR-145-3-106p  
hsa-miR-145-3-107p  
hsa-miR-145-3-108p  
hsa-miR-145-3-109p  
hsa-miR-145-3-110p  
hsa-miR-145-3-111p  
hsa-miR-145-3-112p  
hsa-miR-145-3-113p  
hsa-miR-145-3-114p  
hsa-miR-145-3-115p  
hsa-miR-145-3-116p  
hsa-miR-145-3-117p  
hsa-miR-145-3-118p  
hsa-miR-145-3-119p  
hsa-miR-145-3-120p  
hsa-miR-145-3-121p  
hsa-miR-145-3-122p  
hsa-miR-145-3-123p  
hsa-miR-145-3-124p  
hsa-miR-145-3-125p  
hsa-miR-145-3-126p  
hsa-miR-145-3-127p  
hsa-miR-145-3-128p  
hsa-miR-145-3-129p  
hsa-miR-145-3-130p  
hsa-miR-145-3-131p  
hsa-miR-145-3-132p  
hsa-miR-145-3-133p  
hsa-miR-145-3-134p  
hsa-miR-145-3-135p  
hsa-miR-145-3-136p  
hsa-miR-145-3-137p  
hsa-miR-145-3-138p  
hsa-miR-145-3-139p  
hsa-miR-145-3-140p  
hsa-miR-145-3-141p  
hsa-miR-145-3-142p  
hsa-miR-145-3-143p  
hsa-miR-145-3-144p  
hsa-miR-145-3-145p  
hsa-miR-145-3-146p  
hsa-miR-145-3-147p  
hsa-miR-145-3-148p  
hsa-miR-145-3-149p  
hsa-miR-145-3-150p  
hsa-miR-145-3-151p  
hsa-miR-145-3-152p  
hsa-miR-145-3-153p  
hsa-miR-145-3-154p  
hsa-miR-145-3-155p  
hsa-miR-145-3-156p  
hsa-miR-145-3-157p  
hsa-miR-145-3-158p  
hsa-miR-145-3-159p  
hsa-miR-145-3-160p  
hsa-miR-145-3-161p  
hsa-miR-145-3-162p  
hsa-miR-145-3-163p  
hsa-miR-145-3-164p  
hsa-miR-145-3-165p  
hsa-miR-145-3-166p  
hsa-miR-145-3-167p  
hsa-miR-145-3-168p  
hsa-miR-145-3-169p  
hsa-miR-145-3-170p  
hsa-miR-145-3-171p  
hsa-miR-145-3-172p  
hsa-miR-145-3-173p  
hsa-miR-145-3-174p  
hsa-miR-145-3-175p  
hsa-miR-145-3-176p  
hsa-miR-145-3-177p  
hsa-miR-145-3-178p  
hsa-miR-145-3-179p  
hsa-miR-145-3-180p  
hsa-miR-145-3-181p  
hsa-miR-145-3-182p  
hsa-miR-145-3-183p  
hsa-miR-145-3-184p  
hsa-miR-145-3-185p  
hsa-miR-145-3-186p  
hsa-miR-145-3-187p  
hsa-miR-145-3-188p  
hsa-miR-145-3-189p  
hsa-miR-145-3-190p  
hsa-miR-145-3-191p  
hsa-miR-145-3-192p  
hsa-miR-145-3-193p  
hsa-miR-145-3-194p  
hsa-miR-145-3-195p  
hsa-miR-145-3-196p  
hsa-miR-145-3-197p  
hsa-miR-145-3-198p  
hsa-miR-145-3-199p  
hsa-miR-145-3-200p

YRI\_vs\_CEU  
YRI\_vs\_FIN  
YRI\_vs\_GBR  
YRI\_vs\_TSI

Population Comparison

Supp. Figure 5  
(page 210)

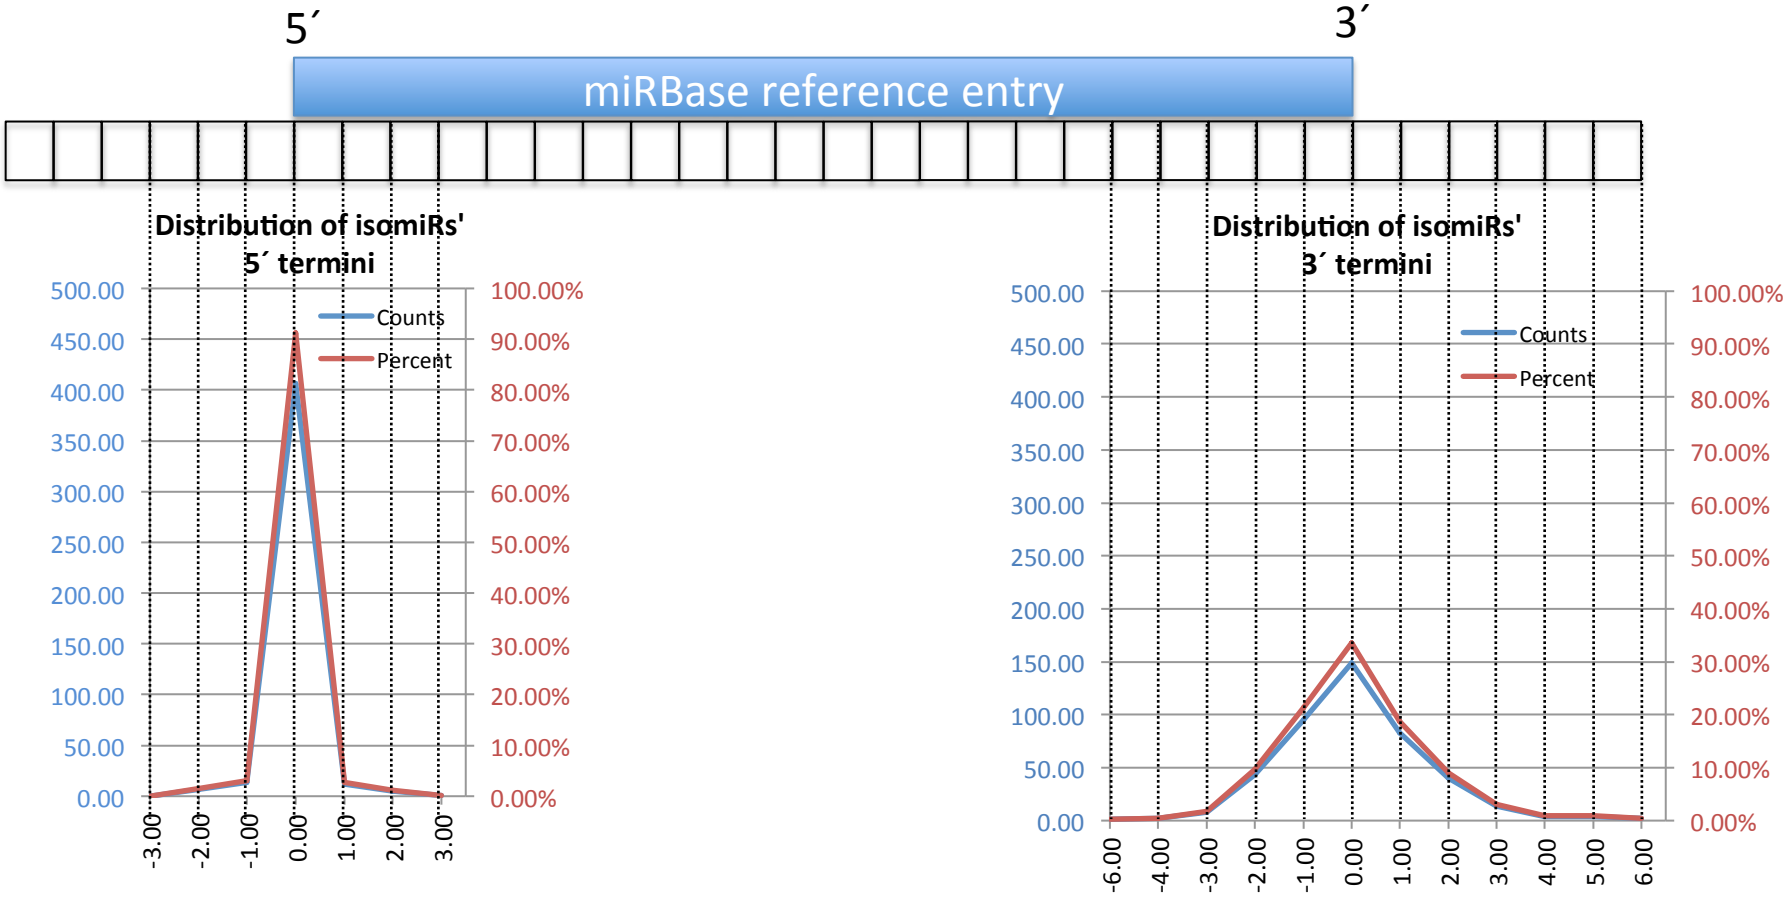

**Supp. Table 1. Statistics for each population separately for the single most abundant isomiR produced from a given precursor arm.** The most abundant isomiR's identity was determined by analyzing the technical replicates separately for each of the populations. At each locus, we also generated the “conservative” estimate by requiring that the most abundant isomiR have higher expression than the miRBase reference by at least 0.585 log<sub>2</sub> units.

|                                                         | CEU    |            | FIN    |            | GBR    |            | TSI    |            | YRI    |            |
|---------------------------------------------------------|--------|------------|--------|------------|--------|------------|--------|------------|--------|------------|
|                                                         | Number | Percentage | Number | Percentage | Number | Percentage | Number | Percentage | Number | Percentage |
| MiRNA precursor arms considered                         | 197    |            | 190    |            | 170    |            | 192    |            | 188    |            |
| MiRBase miRNA sequence not among the 95-th percentile   | 63     | 32%        | 61     | 32%        | 56     | 33%        | 66     | 34%        | 57     | 30%        |
| Top isomiR not in agreement with miRBase                | 99     | 50%        | 93     | 49%        | 92     | 54%        | 97     | 51%        | 96     | 51%        |
| Top isomiR (conservative) not in agreement with miRBase | 86     | 44%        | 84     | 44%        | 77     | 45%        | 87     | 45%        | 83     | 44%        |
| Top isomiR disagrees with miRBase at 5' end             | 13     | 7%         | 13     | 7%         | 10     | 6%         | 13     | 7%         | 10     | 5%         |
| Top isomiR disagrees with miRBase at 5' end <i>only</i> | 3      | 2%         | 2      | 1%         | 2      | 1%         | 3      | 2%         | 2      | 1%         |
| Top isomiR disagrees with miRBase at 3' end             | 96     | 49%        | 91     | 48%        | 90     | 53%        | 94     | 49%        | 94     | 50%        |
| Top isomiR disagrees with miRBase at 3' end <i>only</i> | 86     | 44%        | 80     | 42%        | 82     | 48%        | 84     | 44%        | 86     | 46%        |
| Top isomiR disagrees with miRBase at <i>both ends</i>   | 10     | 5%         | 11     | 6%         | 8      | 5%         | 10     | 5%         | 8      | 4%         |

**Supp. Table 2. Statistics for each population separately for the single most abundant isomiR produced from a given precursor arm – using only females.** The most abundant isomiR’s identity was determined by analyzing the entire collection of all unique datasets that passed quality control and belonged to females. At each locus, we also generated the “conservative” estimate by requiring that the most abundant isomiR have higher expression than the miRBase reference by at least 0.585 log2 units.

|                                                         | CEU    |            | FIN    |            | GBR    |            | TSI    |            | YRI    |            |
|---------------------------------------------------------|--------|------------|--------|------------|--------|------------|--------|------------|--------|------------|
|                                                         | Number | Percentage | Number | Percentage | Number | Percentage | Number | Percentage | Number | Percentage |
| MiRNA precursor arms considered                         | 198    |            | 189    |            | 193    |            | 182    |            | 199    |            |
| MiRBase miRNA sequence not among the 95-th percentile   | 57     | 30%        | 52     | 28%        | 58     | 31%        | 56     | 30%        | 59     | 30%        |
| Top isomiR not in agreement with miRBase                | 94     | 47%        | 91     | 48%        | 95     | 49%        | 87     | 48%        | 97     | 49%        |
| Top isomiR (conservative) not in agreement with miRBase | 84     | 42%        | 81     | 43%        | 87     | 45%        | 79     | 43%        | 87     | 44%        |
| Top isomiR disagrees with miRBase at 5' end             | 13     | 7%         | 12     | 6%         | 12     | 6%         | 10     | 5%         | 13     | 7%         |
| Top isomiR disagrees with miRBase at 5' end <b>only</b> | 2      | 1%         | 3      | 2%         | 3      | 2%         | 1      | 1%         | 2      | 1%         |
| Top isomiR disagrees with miRBase at 3' end             | 92     | 46%        | 88     | 47%        | 92     | 48%        | 86     | 47%        | 95     | 48%        |
| Top isomiR disagrees with miRBase at 3' end <b>only</b> | 81     | 41%        | 79     | 42%        | 83     | 43%        | 77     | 42%        | 84     | 42%        |
| Top isomiR disagrees with miRBase at <b>both ends</b>   | 11     | 6%         | 9      | 5%         | 9      | 5%         | 9      | 5%         | 11     | 6%         |

**Supp. Table 3. Statistics for each population separately for the single most abundant isomiR produced from a given precursor arm – using only males.** The most abundant isomiR’s identity was determined by analyzing the entire collection of all unique datasets that passed quality control and belonged to males. At each locus, we also generated the “conservative” estimate by requiring that the most abundant isomiR have higher expression than the miRBase reference by at least 0.585 log2 units.

|                                                         | CEU    |            | FIN    |            | GBR    |            | TSI    |            | YRI    |            |
|---------------------------------------------------------|--------|------------|--------|------------|--------|------------|--------|------------|--------|------------|
|                                                         | Number | Percentage | Number | Percentage | Number | Percentage | Number | Percentage | Number | Percentage |
| MiRNA precursor arms considered                         | 192    |            | 183    |            | 187    |            | 189    |            | 195    |            |
| MiRBase miRNA sequence not among the 95-th percentile   | 63     | 32%        | 58     | 31%        | 60     | 31%        | 54     | 30%        | 62     | 31%        |
| Top isomiR not in agreement with miRBase                | 92     | 48%        | 87     | 48%        | 91     | 49%        | 92     | 49%        | 93     | 48%        |
| Top isomiR (conservative) not in agreement with miRBase | 81     | 42%        | 79     | 43%        | 82     | 44%        | 83     | 44%        | 82     | 42%        |
| Top isomiR disagrees with miRBase at 5' end             | 13     | 7%         | 11     | 6%         | 10     | 5%         | 11     | 6%         | 11     | 6%         |
| Top isomiR disagrees with miRBase at 5' end <b>only</b> | 2      | 1%         | 3      | 2%         | 3      | 2%         | 2      | 1%         | 3      | 2%         |
| Top isomiR disagrees with miRBase at 3' end             | 90     | 47%        | 84     | 46%        | 88     | 47%        | 90     | 48%        | 90     | 46%        |
| Top isomiR disagrees with miRBase at 3' end <b>only</b> | 79     | 41%        | 76     | 42%        | 81     | 43%        | 81     | 43%        | 82     | 42%        |
| Top isomiR disagrees with miRBase at <b>both ends</b>   | 11     | 6%         | 8      | 4%         | 7      | 4%         | 9      | 5%         | 8      | 4%         |
